# Supplementary material for: Conformation-controlled catalytic asymmetric synthesis of Swaminathan ketones
Source: Royal Society of Chemistry journal article supplement (doi:10.1039/d3gc02975a), 2023-09-12

## Supporting Information-II

### Conformation-controlled Catalytic Asymmetric Synthesis of Swaminathan Ketones

*Anugam V. Krishna, Shyam D. Sanwal,<sup>‡</sup> Sibani Rath,<sup>‡</sup> P. R. Lakshmi, and  
Dhevalapally B. Ramachary\**

*Catalysis Laboratory, School of Chemistry, University of Hyderabad, Hyderabad-500 046, India;*

*E-mail: [ramsc@uohyd.ac.in](mailto:ramsc@uohyd.ac.in) and [ramchary.db@gmail.com](mailto:ramchary.db@gmail.com)*

*<sup>‡</sup>These authors contributed equally.*

<sup>1</sup>H NMR 500 MHz CDCl<sub>3</sub>

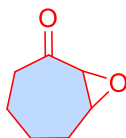

8-oxabicyclo[5.1.0]octan-2-one (crude)

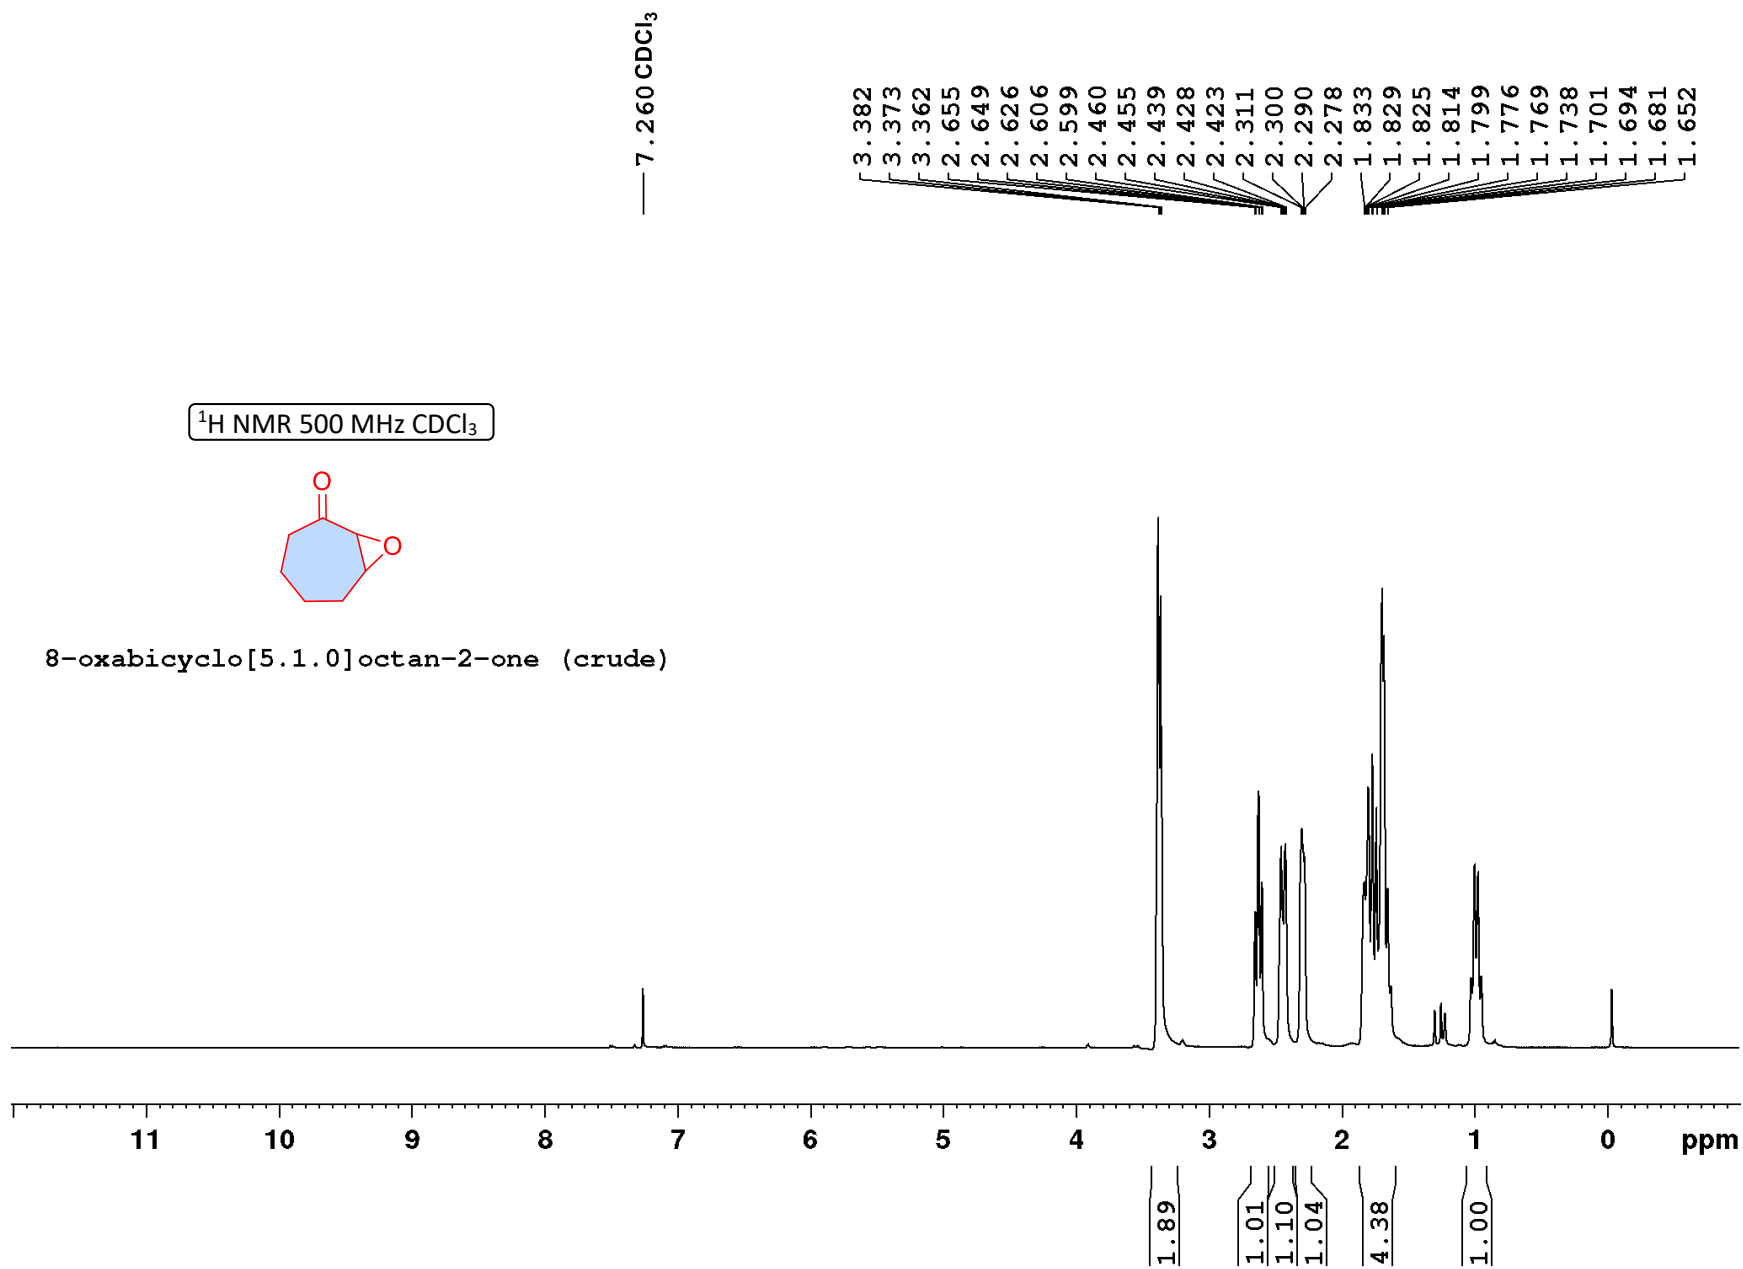

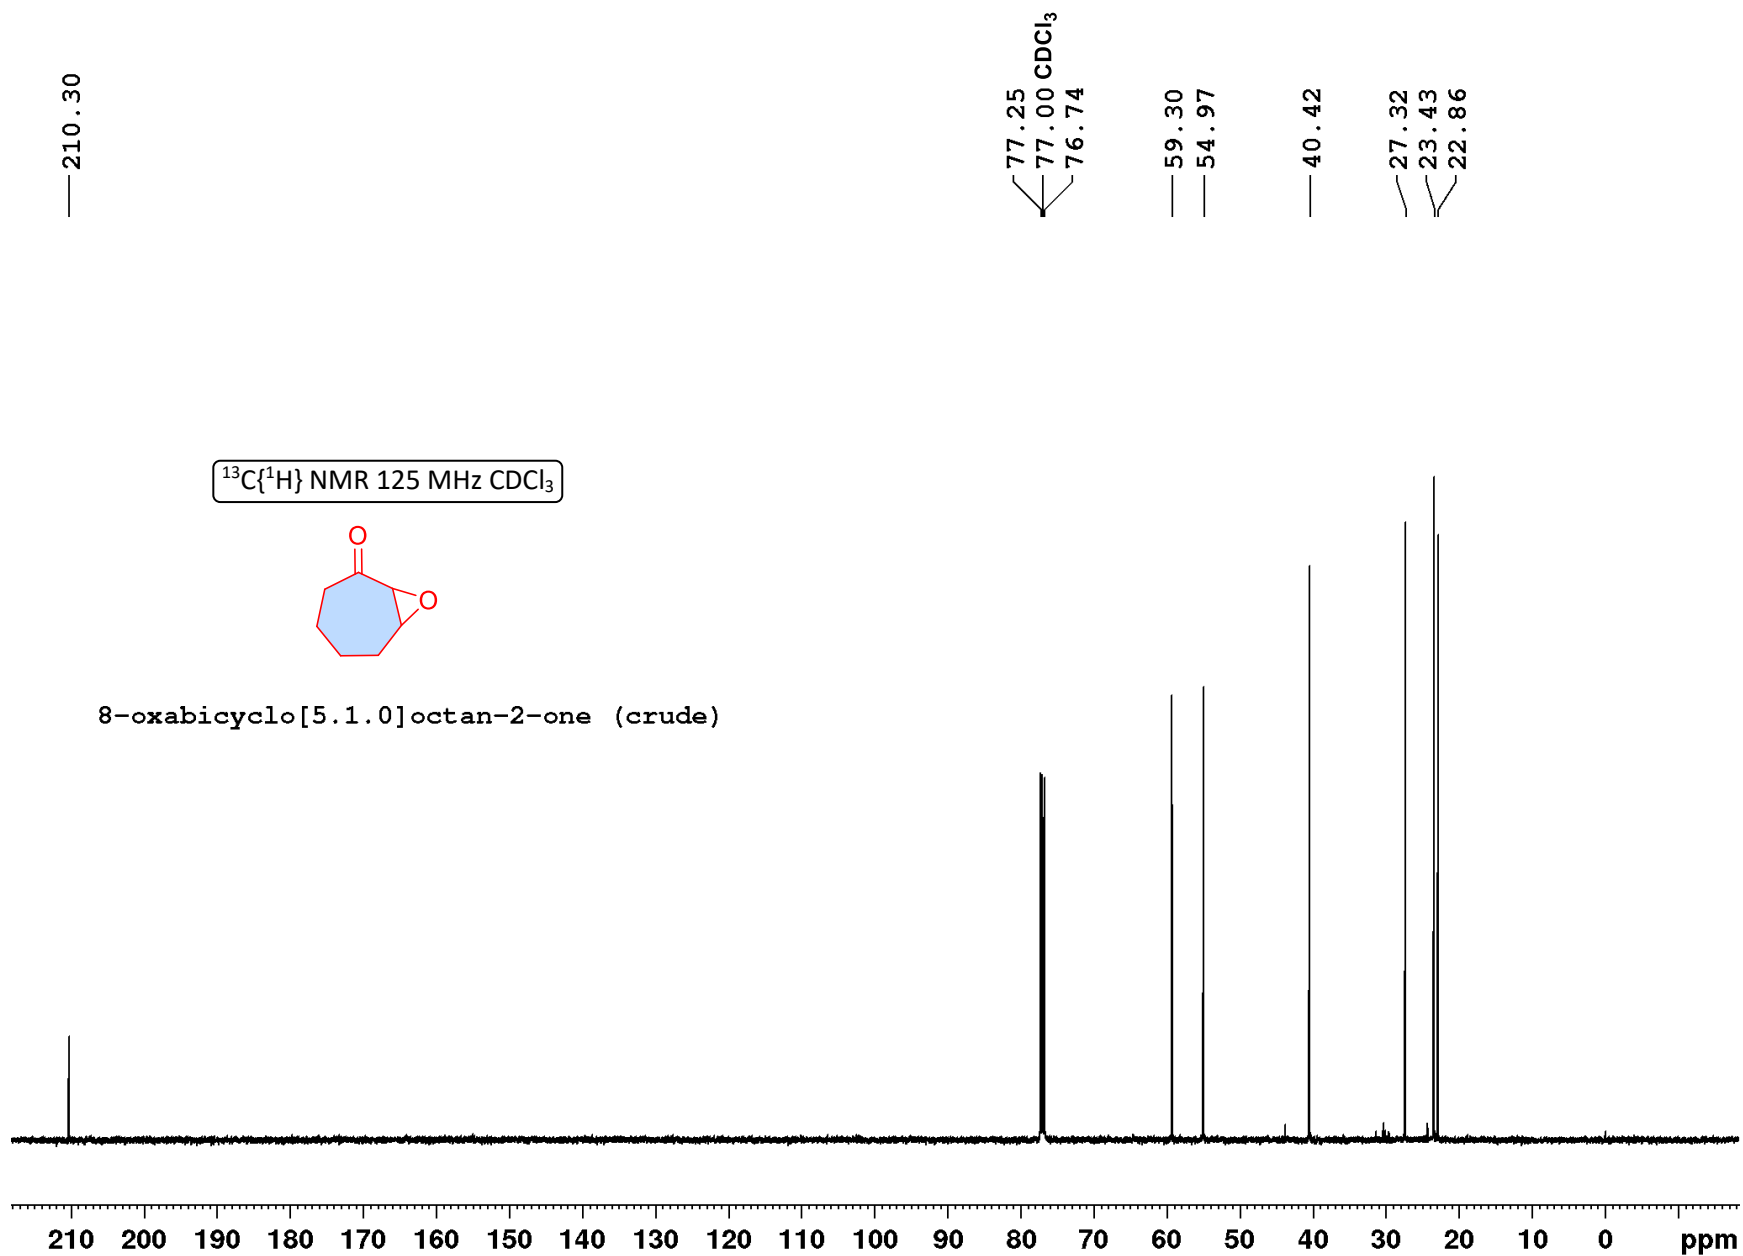

DEPT-135 125 MHz CDCl<sub>3</sub>

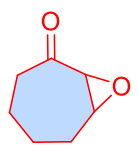

8-oxabicyclo[5.1.0]octan-2-one (crude)

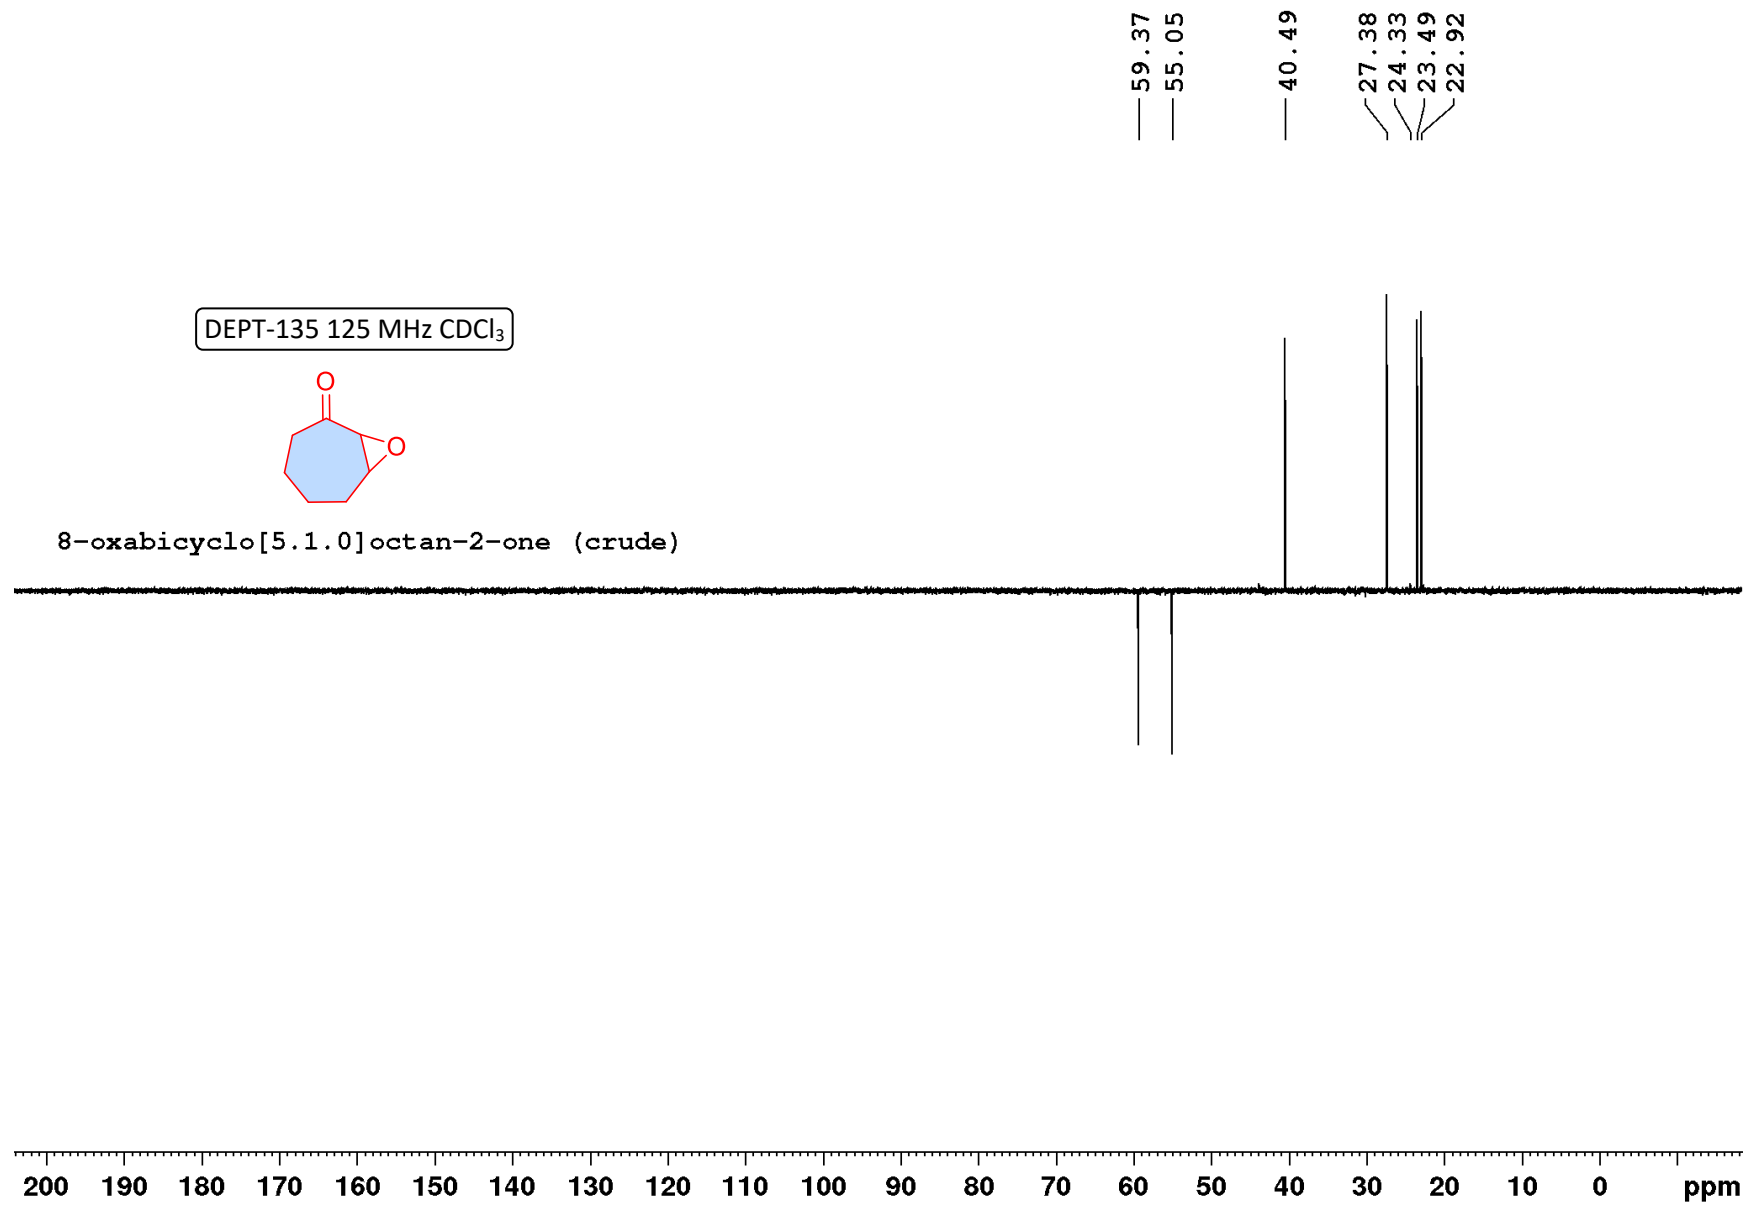

$^1\text{H}$  NMR 500 MHz  $\text{CDCl}_3$

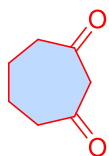

Product-1

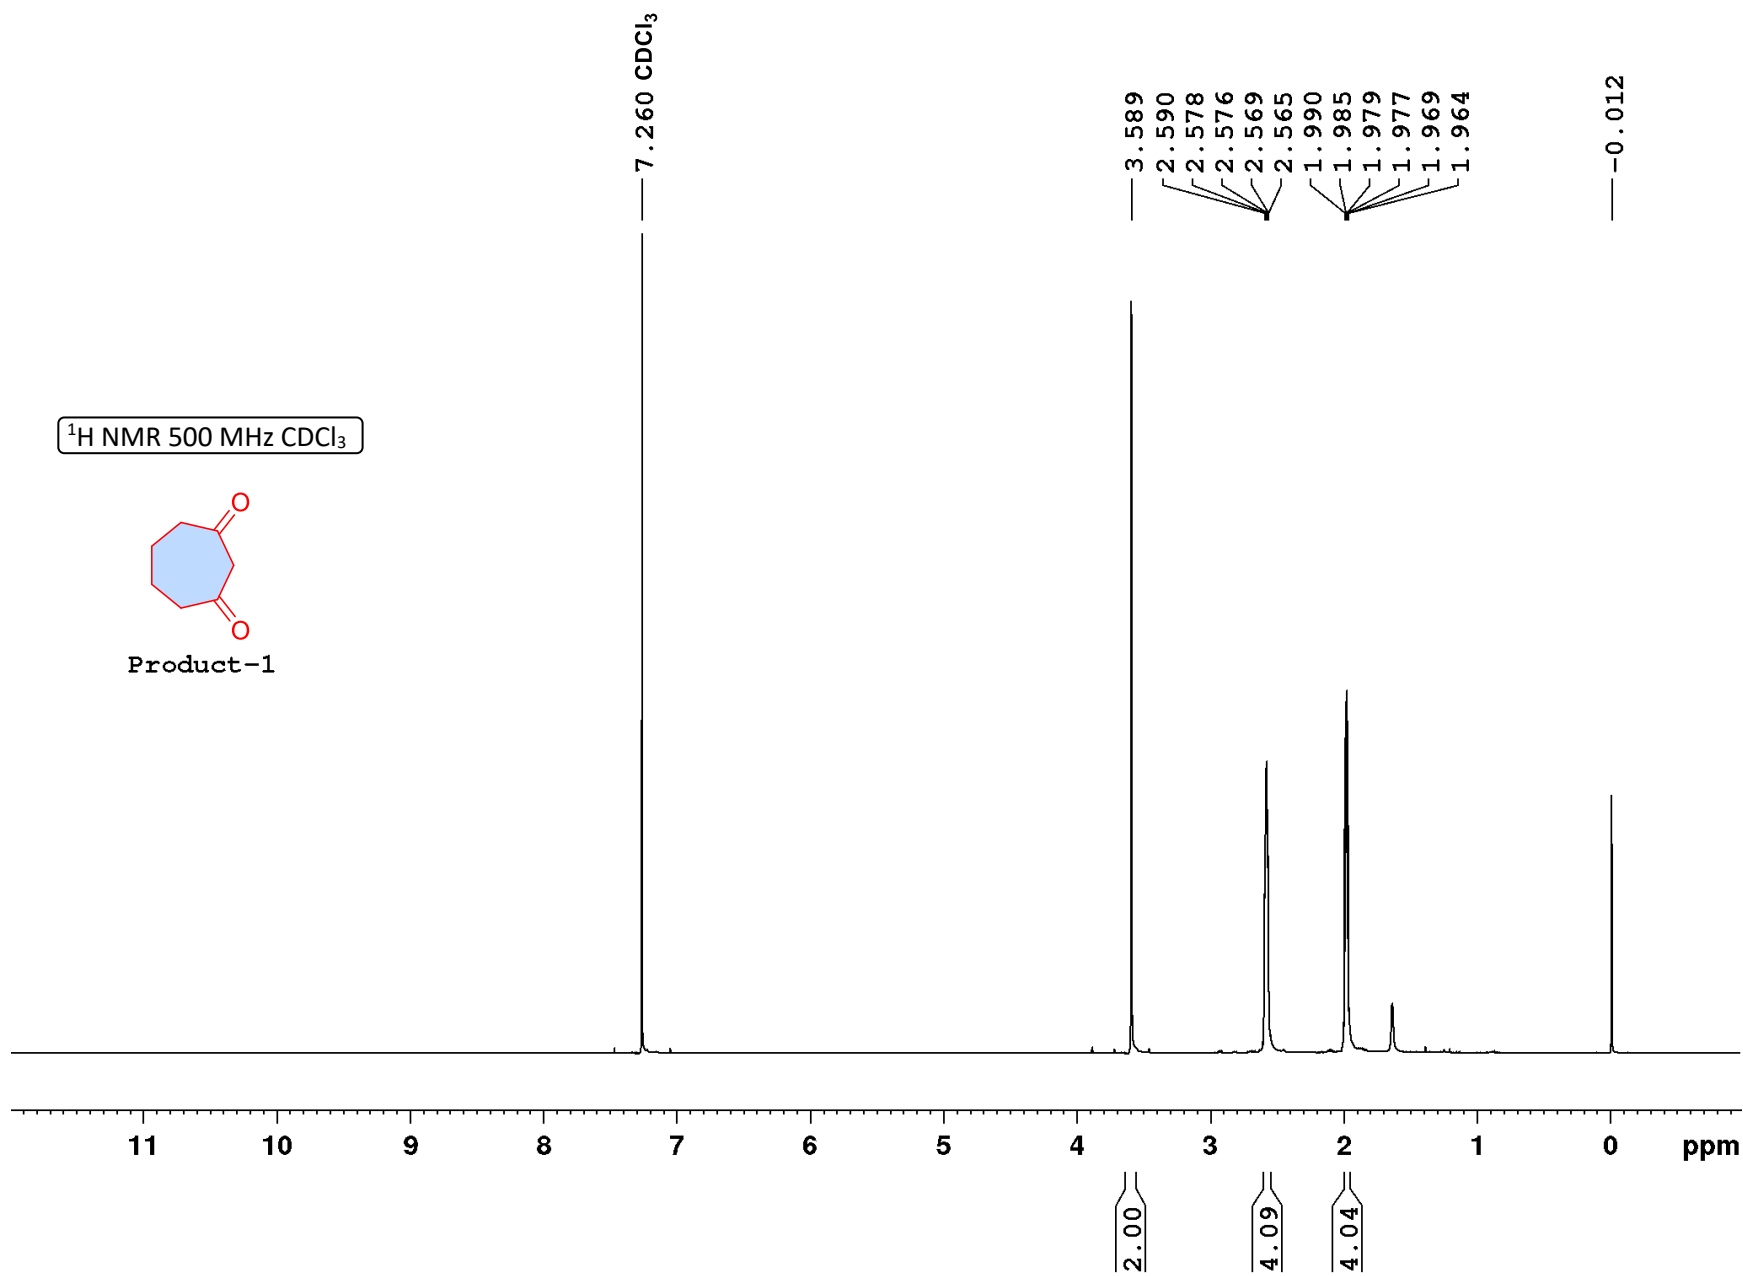

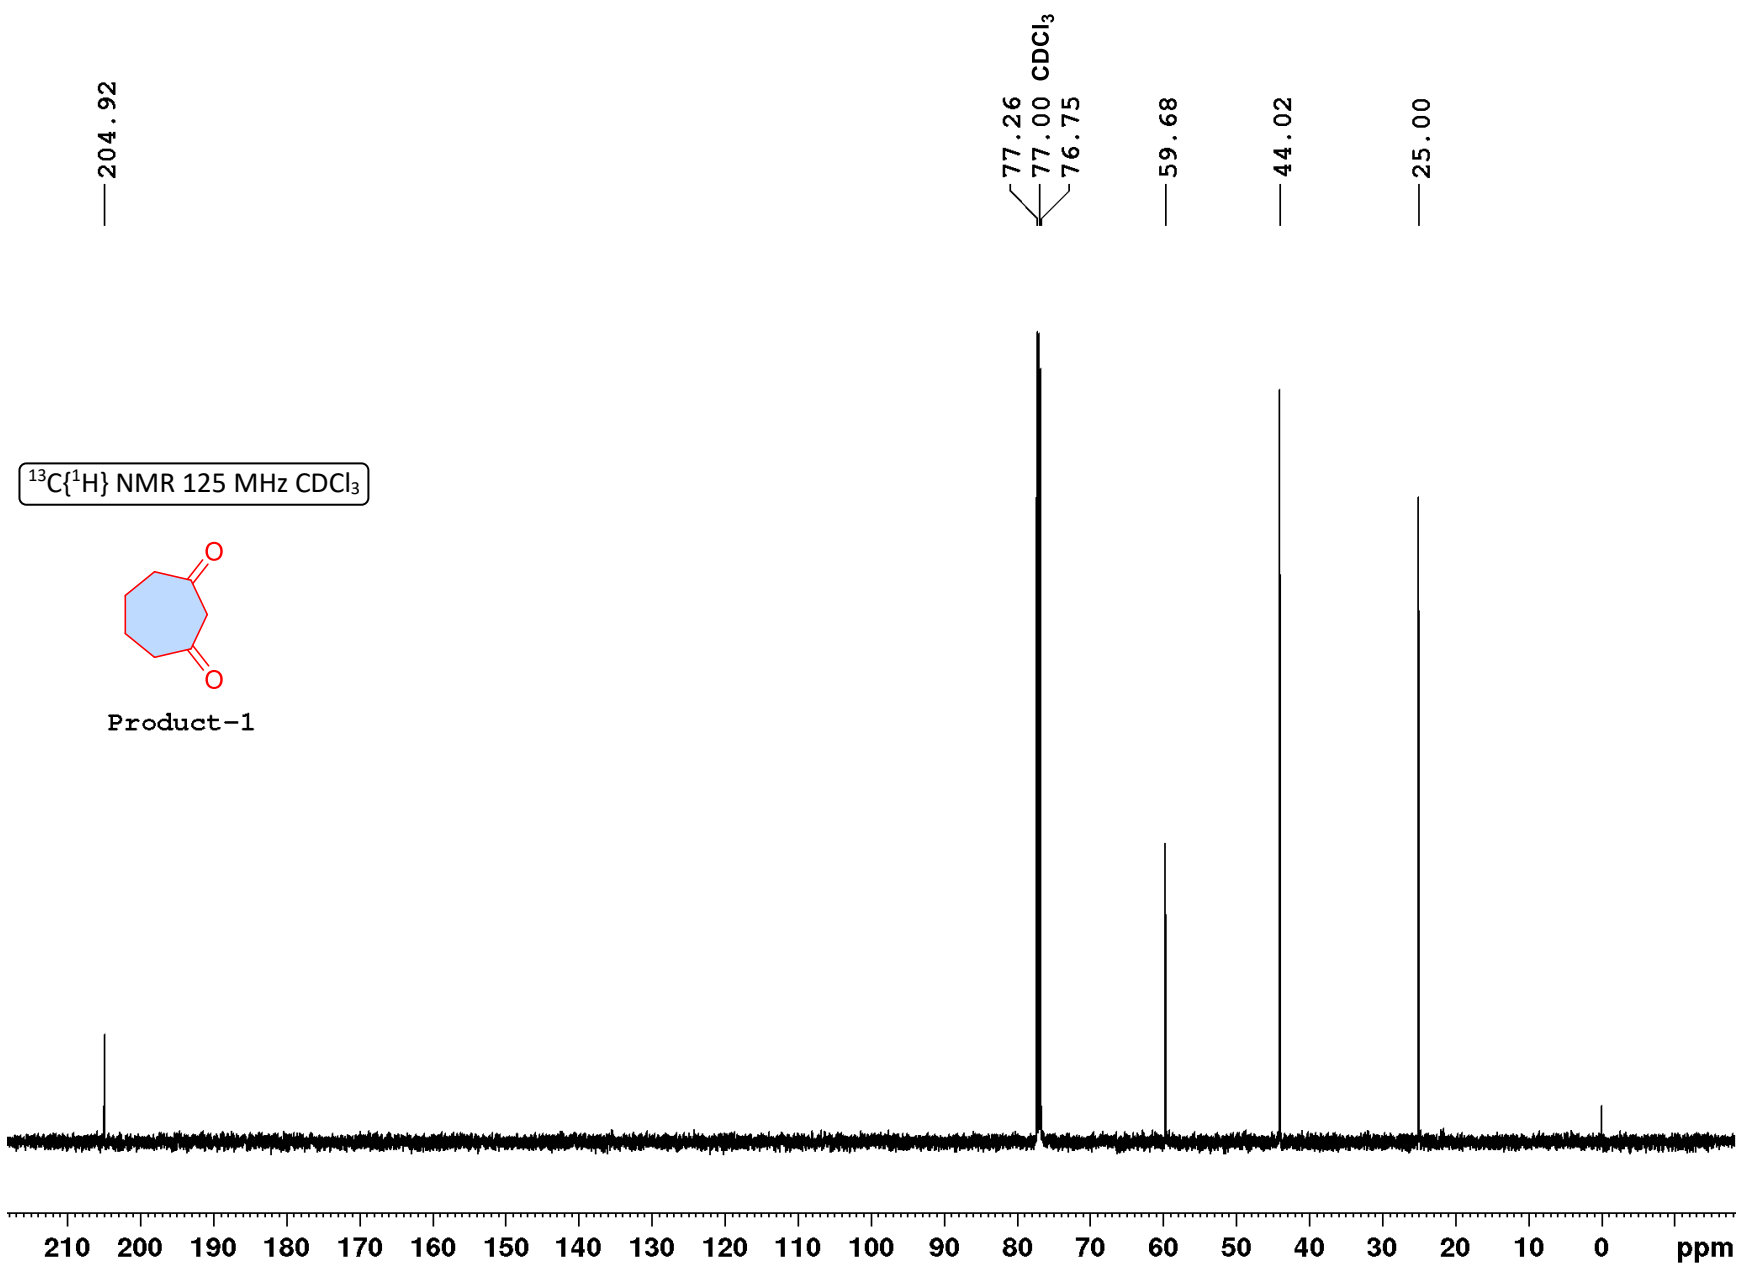

DEPT-135 125 MHz CDCl<sub>3</sub>

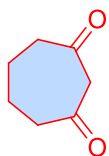

Product-1

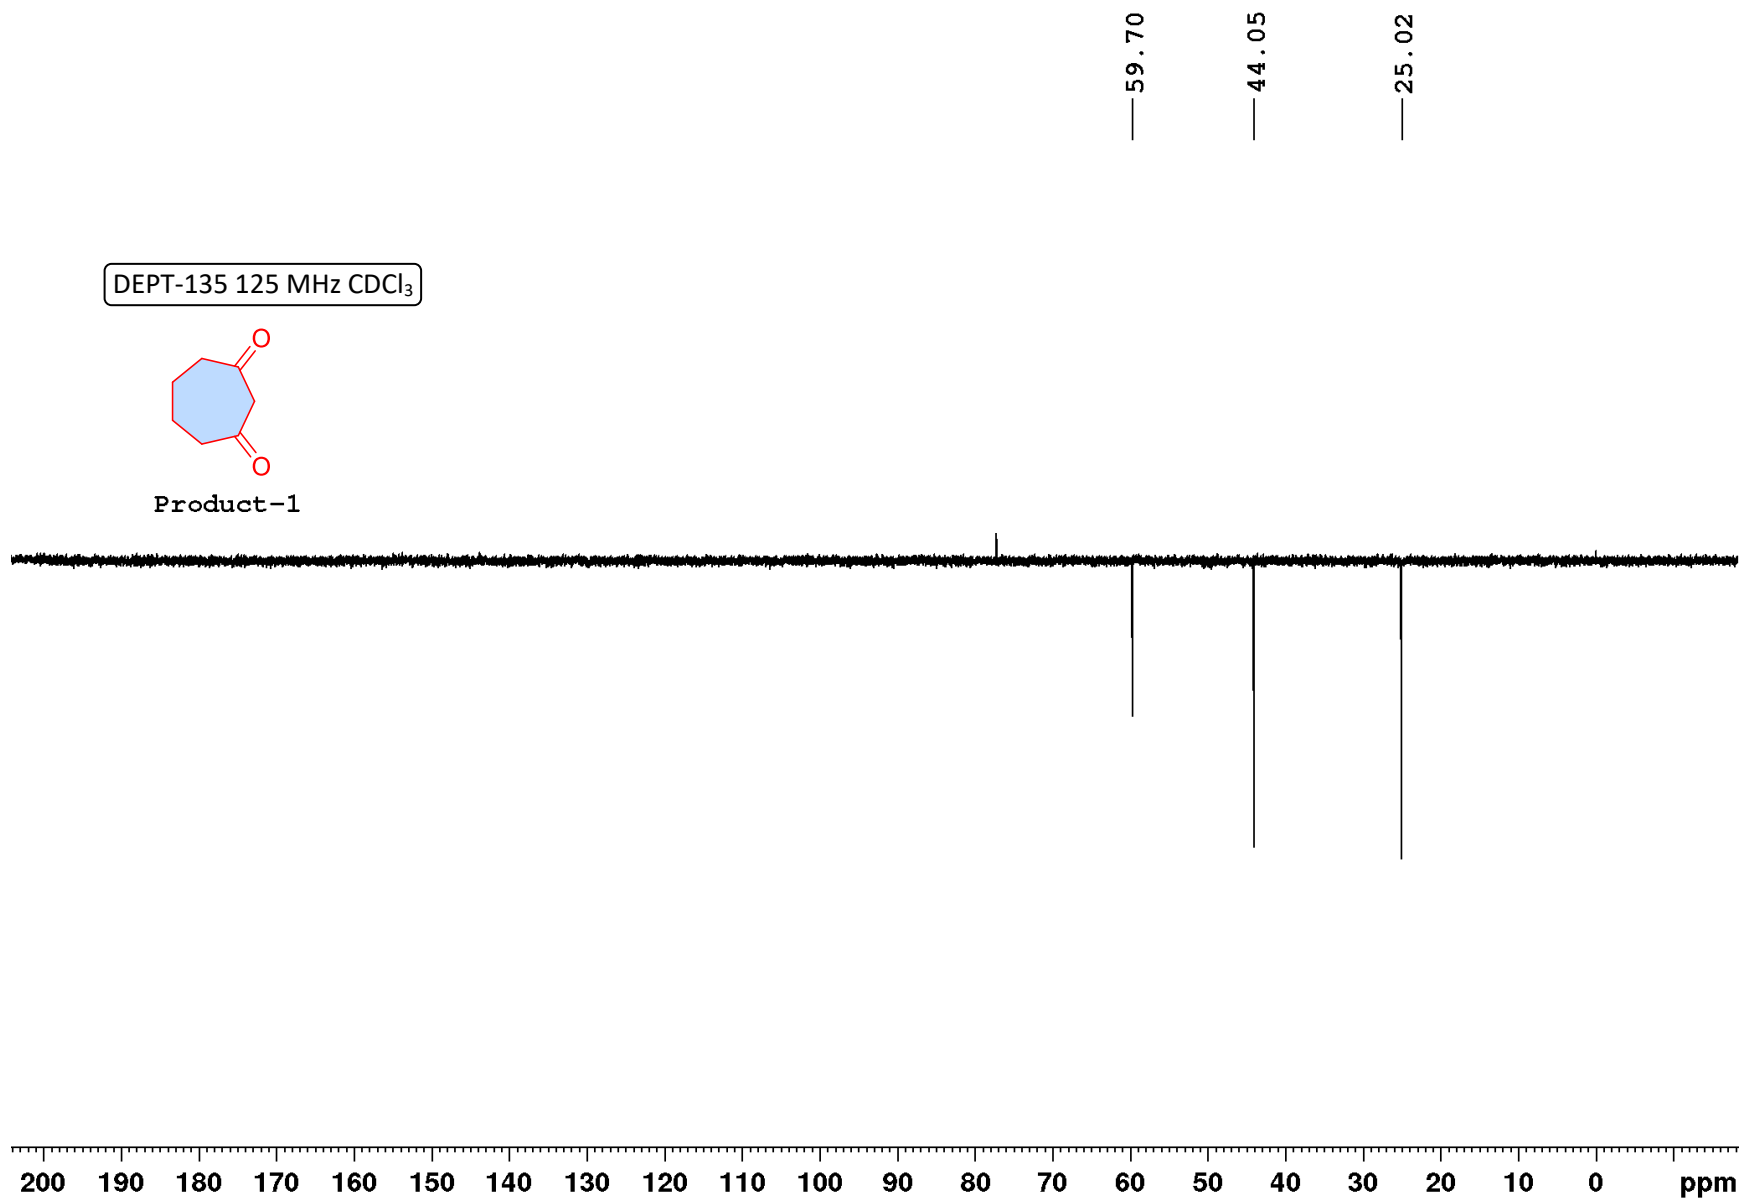

$^1\text{H}$  NMR 500 MHz  $\text{CDCl}_3$

7.260  
7.253  
7.239  
7.224  
7.182  
7.168  
7.149  
7.134  
4.223  
4.210  
4.196  
3.155  
3.142  
2.581  
2.573  
2.564  
2.553  
2.545  
2.536  
2.527  
2.491  
2.484  
2.473  
2.466  
2.455  
2.445  
2.438  
2.125  
2.118  
2.111  
2.107  
2.102  
2.094  
2.084  
2.077  
2.069  
2.060  
2.052  
1.877  
1.874  
1.869  
1.866  
1.865  
1.856  
1.849  
1.845  
1.842  
1.841  
1.835  
1.832  
1.828  
1.825  
1.824  
1.819  
1.815  
1.814  
1.809  
-0.001

$^1\text{H}$  NMR 500 MHz  $\text{CDCl}_3$

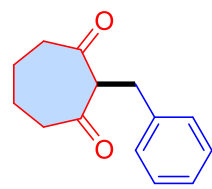

Product-6a

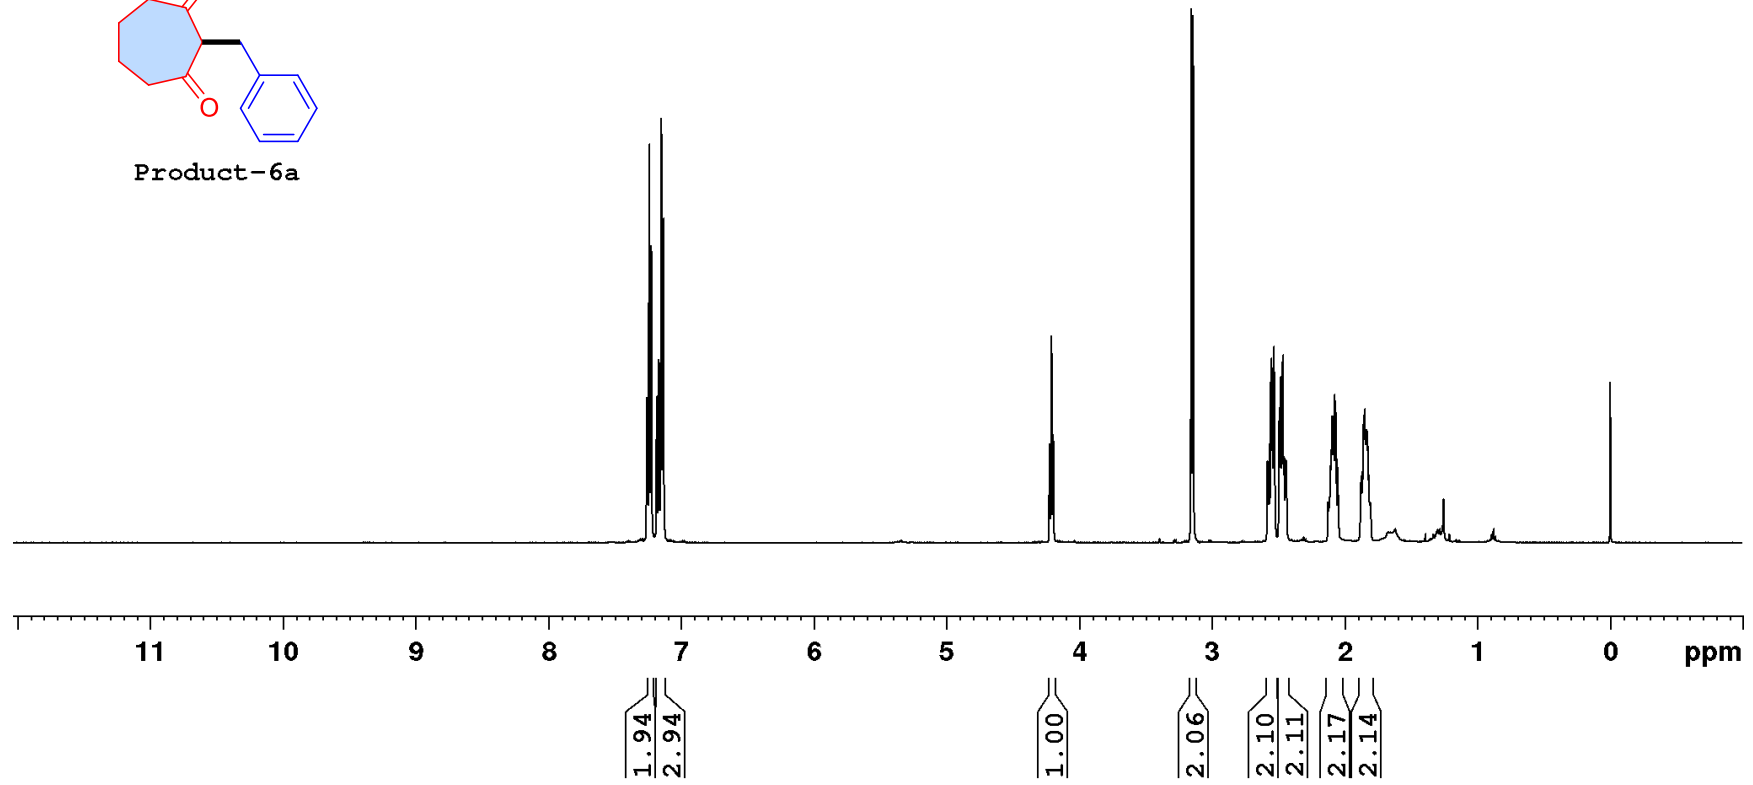



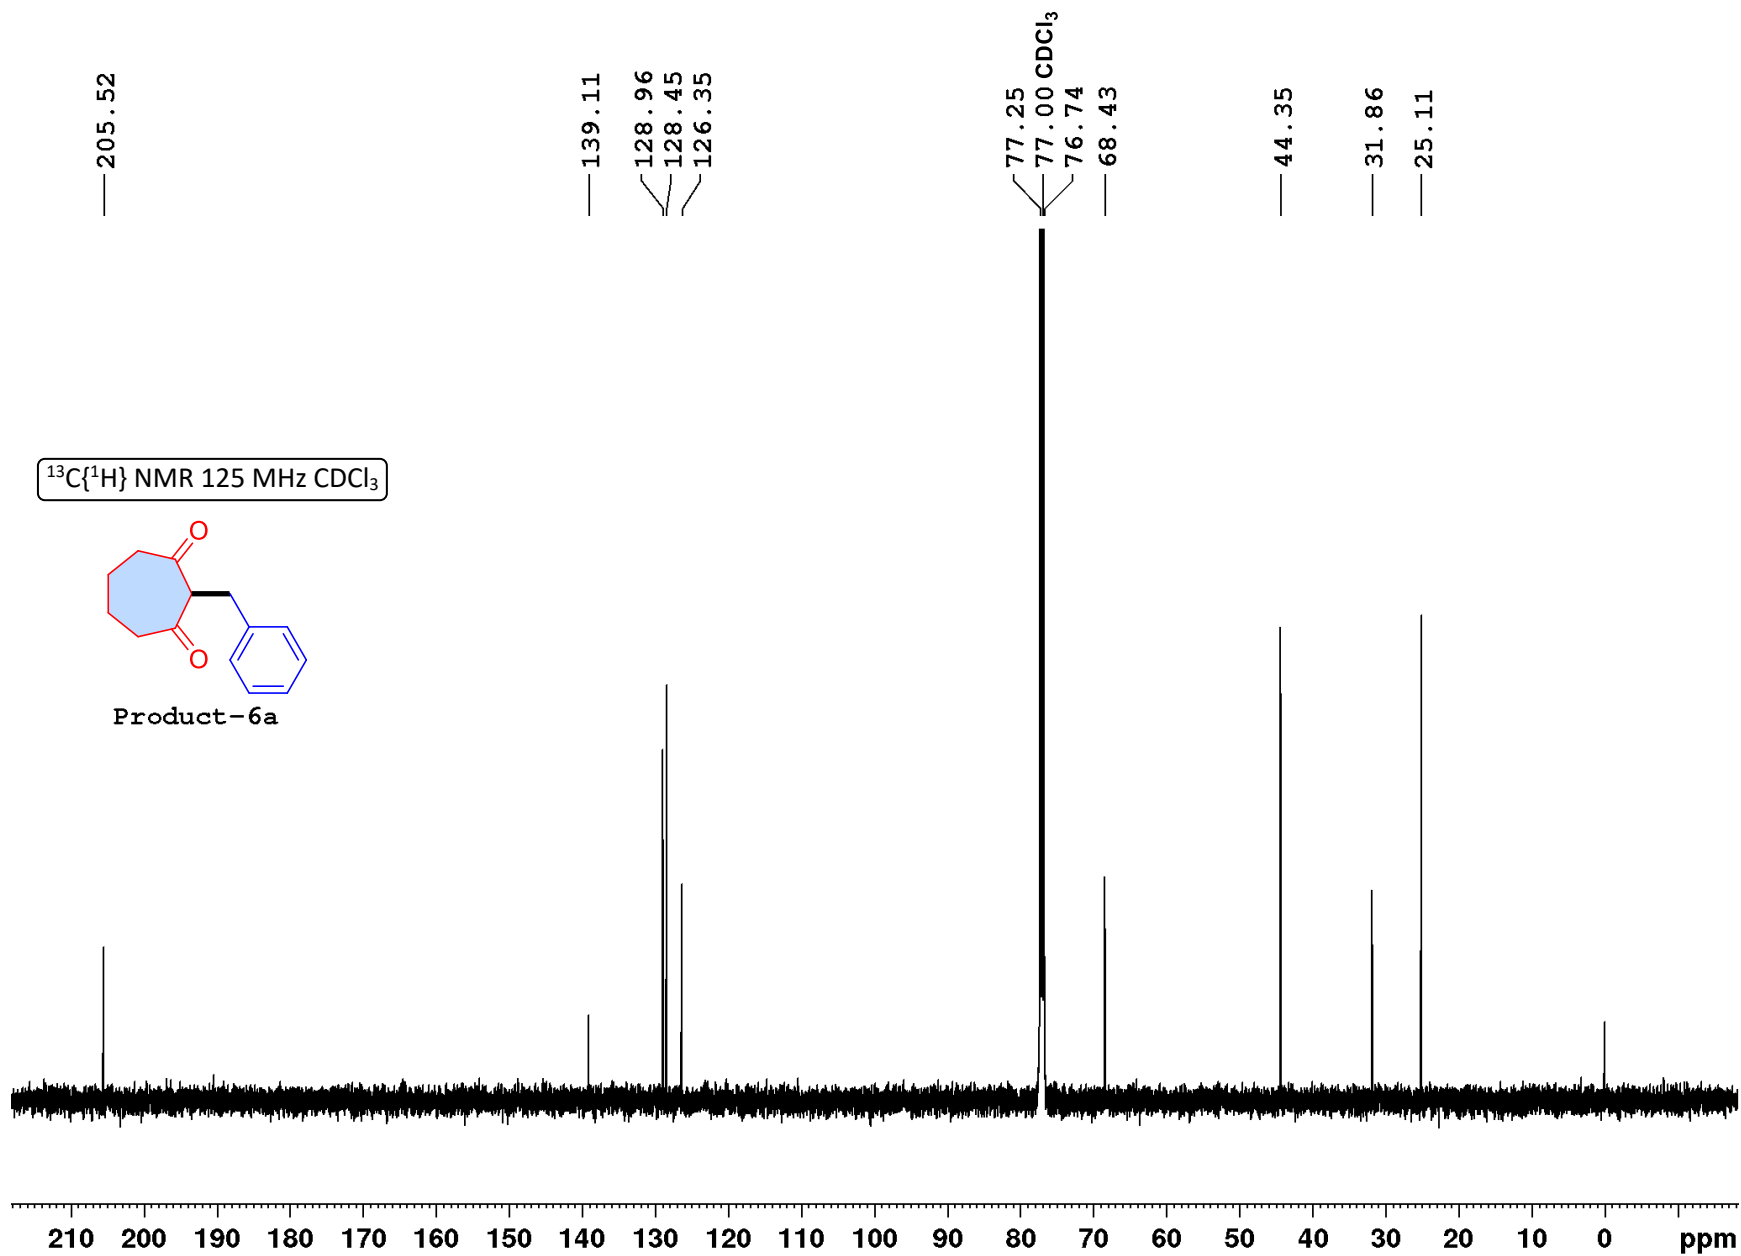

DEPT-135 125 MHz CDCl<sub>3</sub>

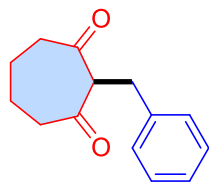

Product-6a

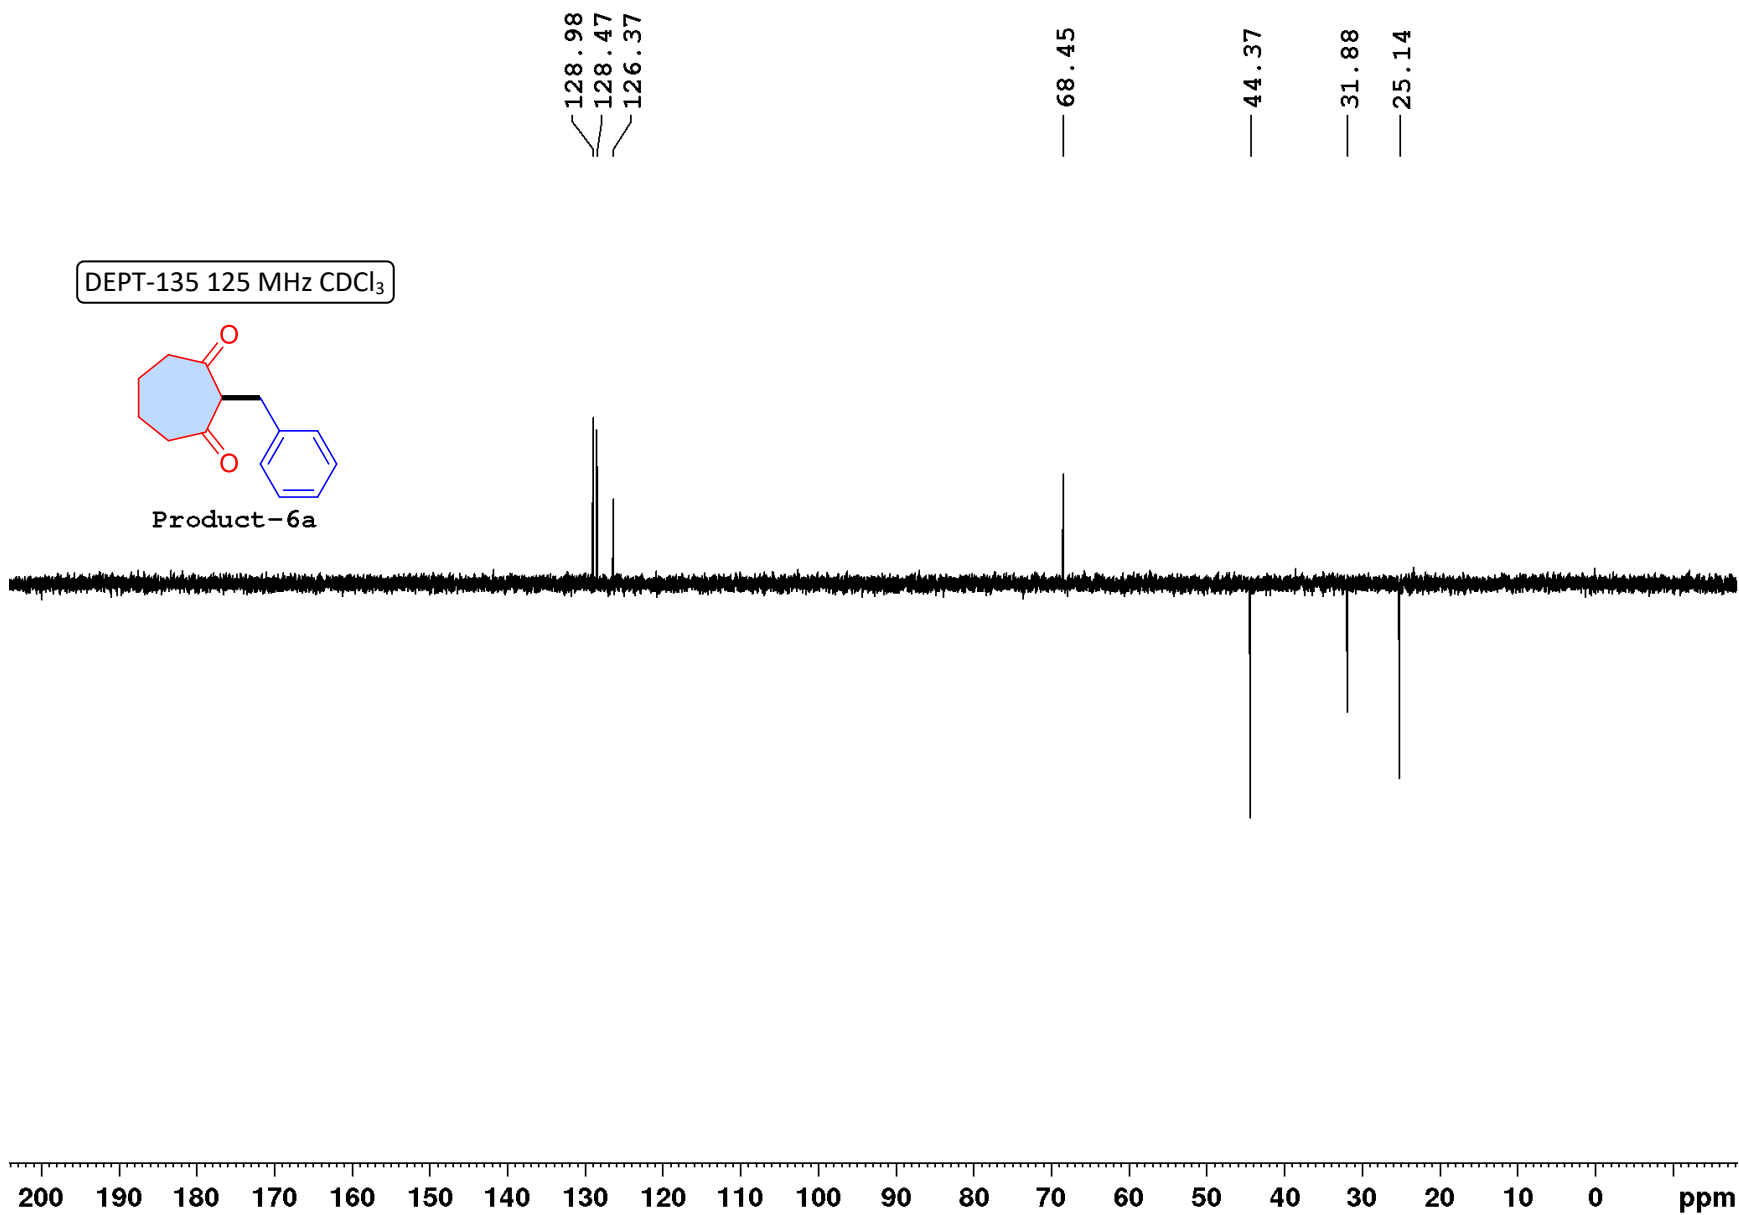

$^1\text{H NMR}$  500 MHz  $\text{CDCl}_3$

$^1\text{H NMR}$  500 MHz  $\text{CDCl}_3$

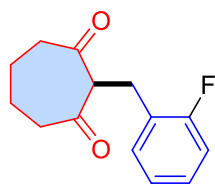

Product-6b

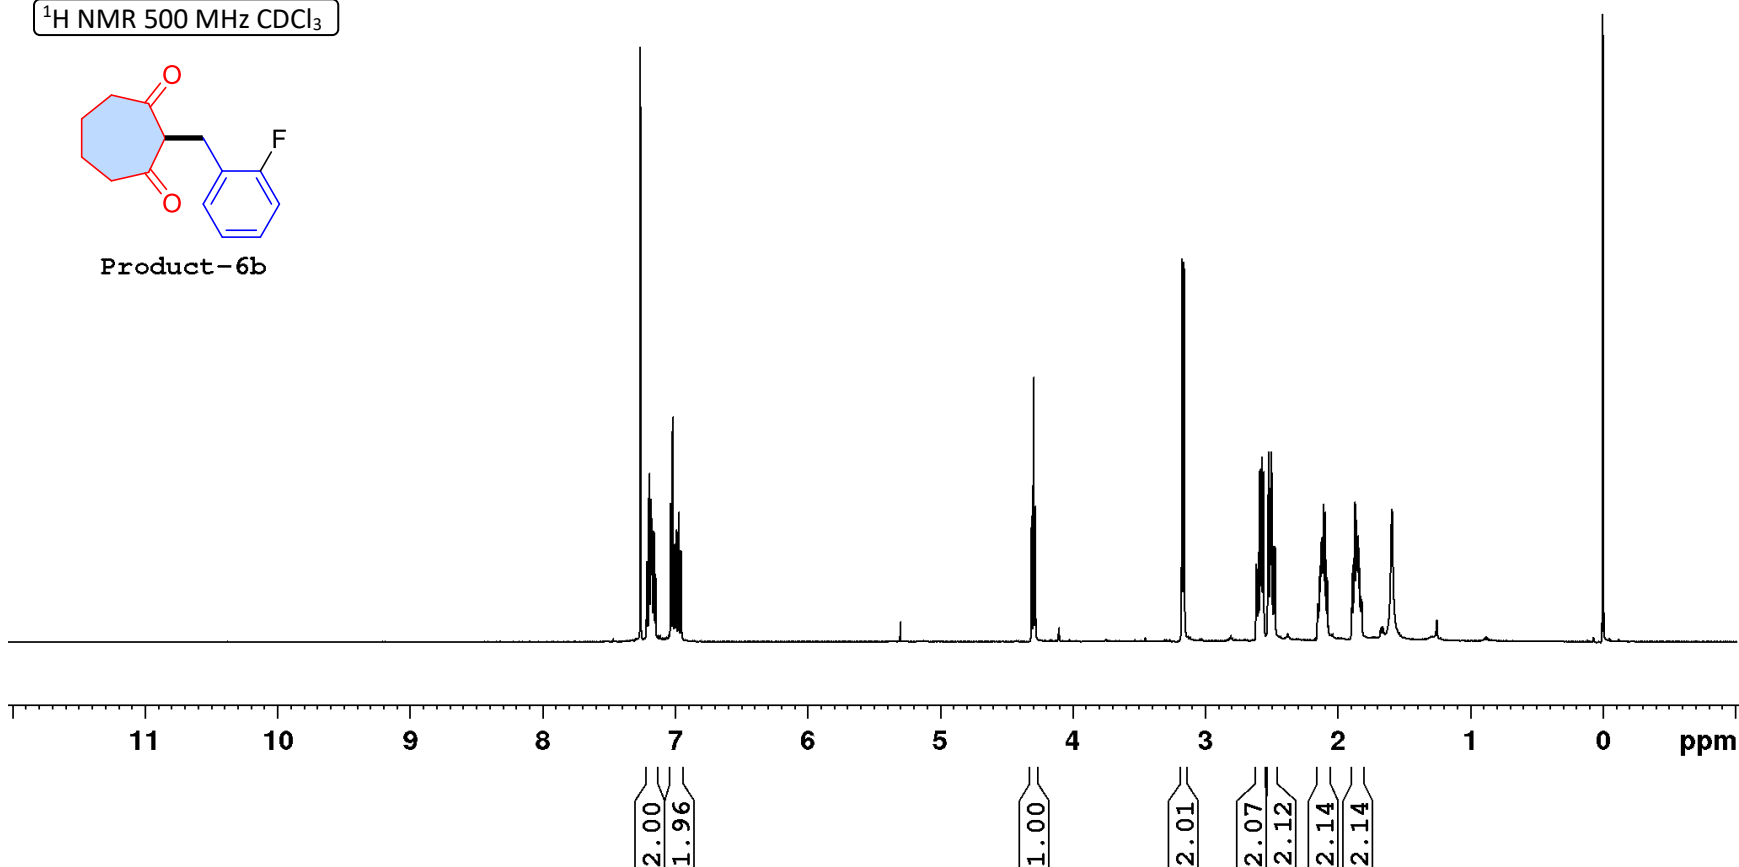

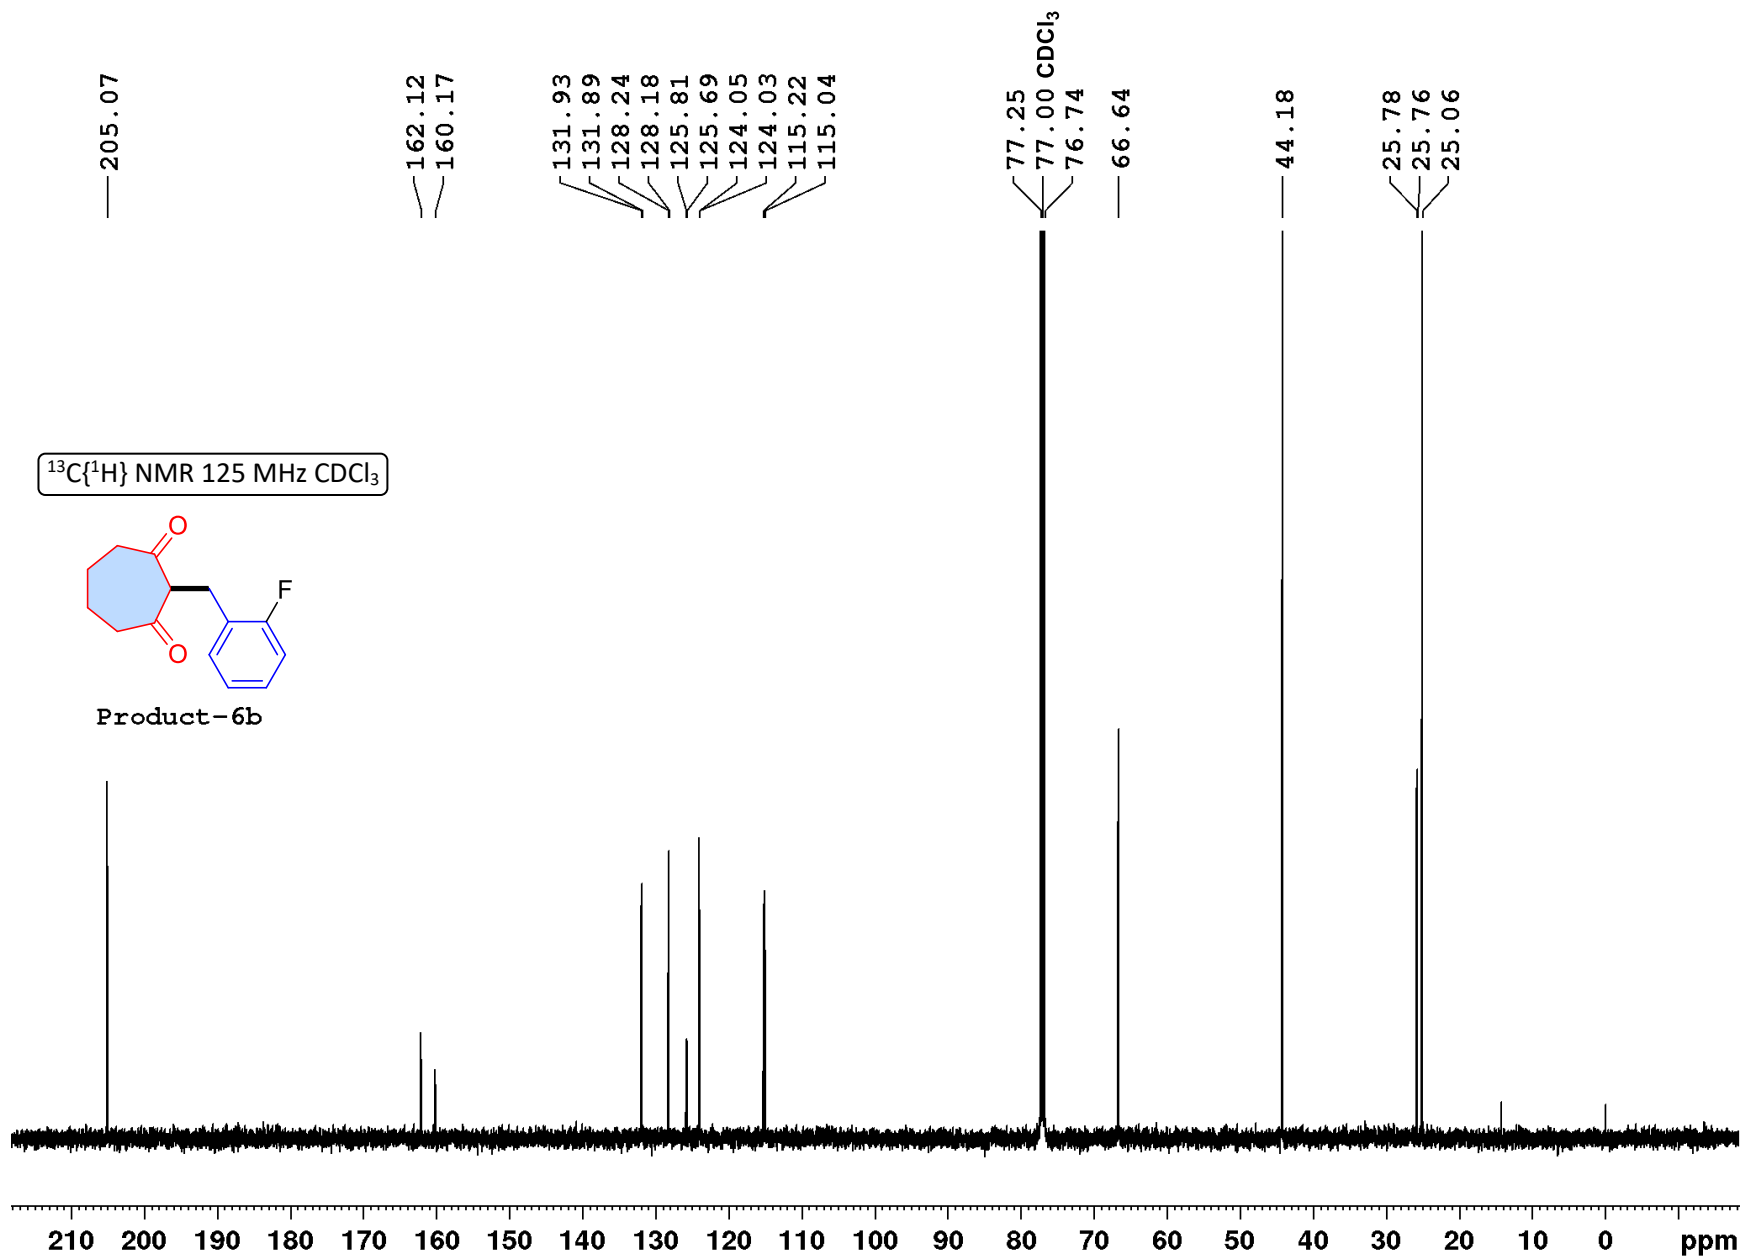

DEPT-135 125 MHz CDCl<sub>3</sub>

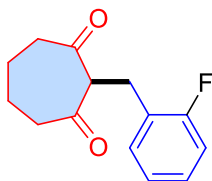

Product-6b

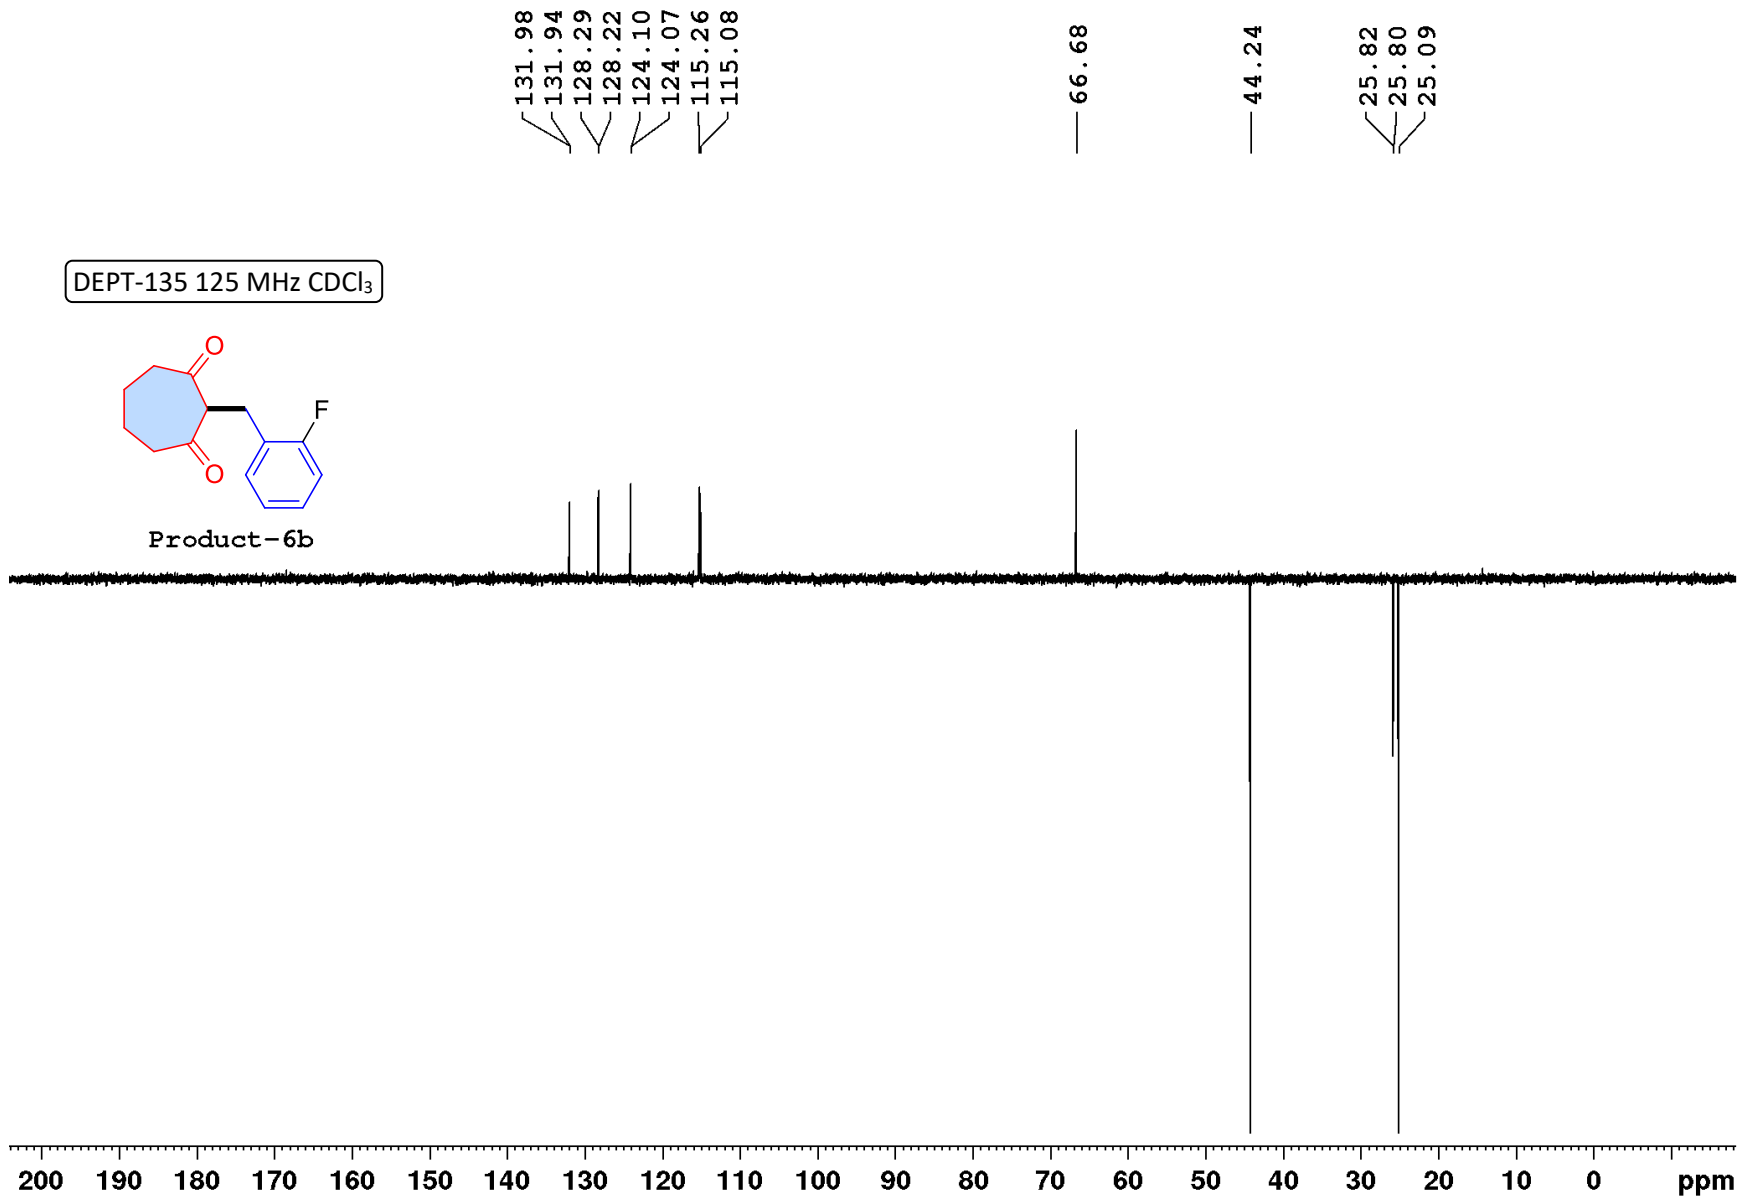

<sup>19</sup>F NMR 375 MHz CDCl<sub>3</sub>

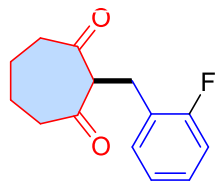

Product-6b

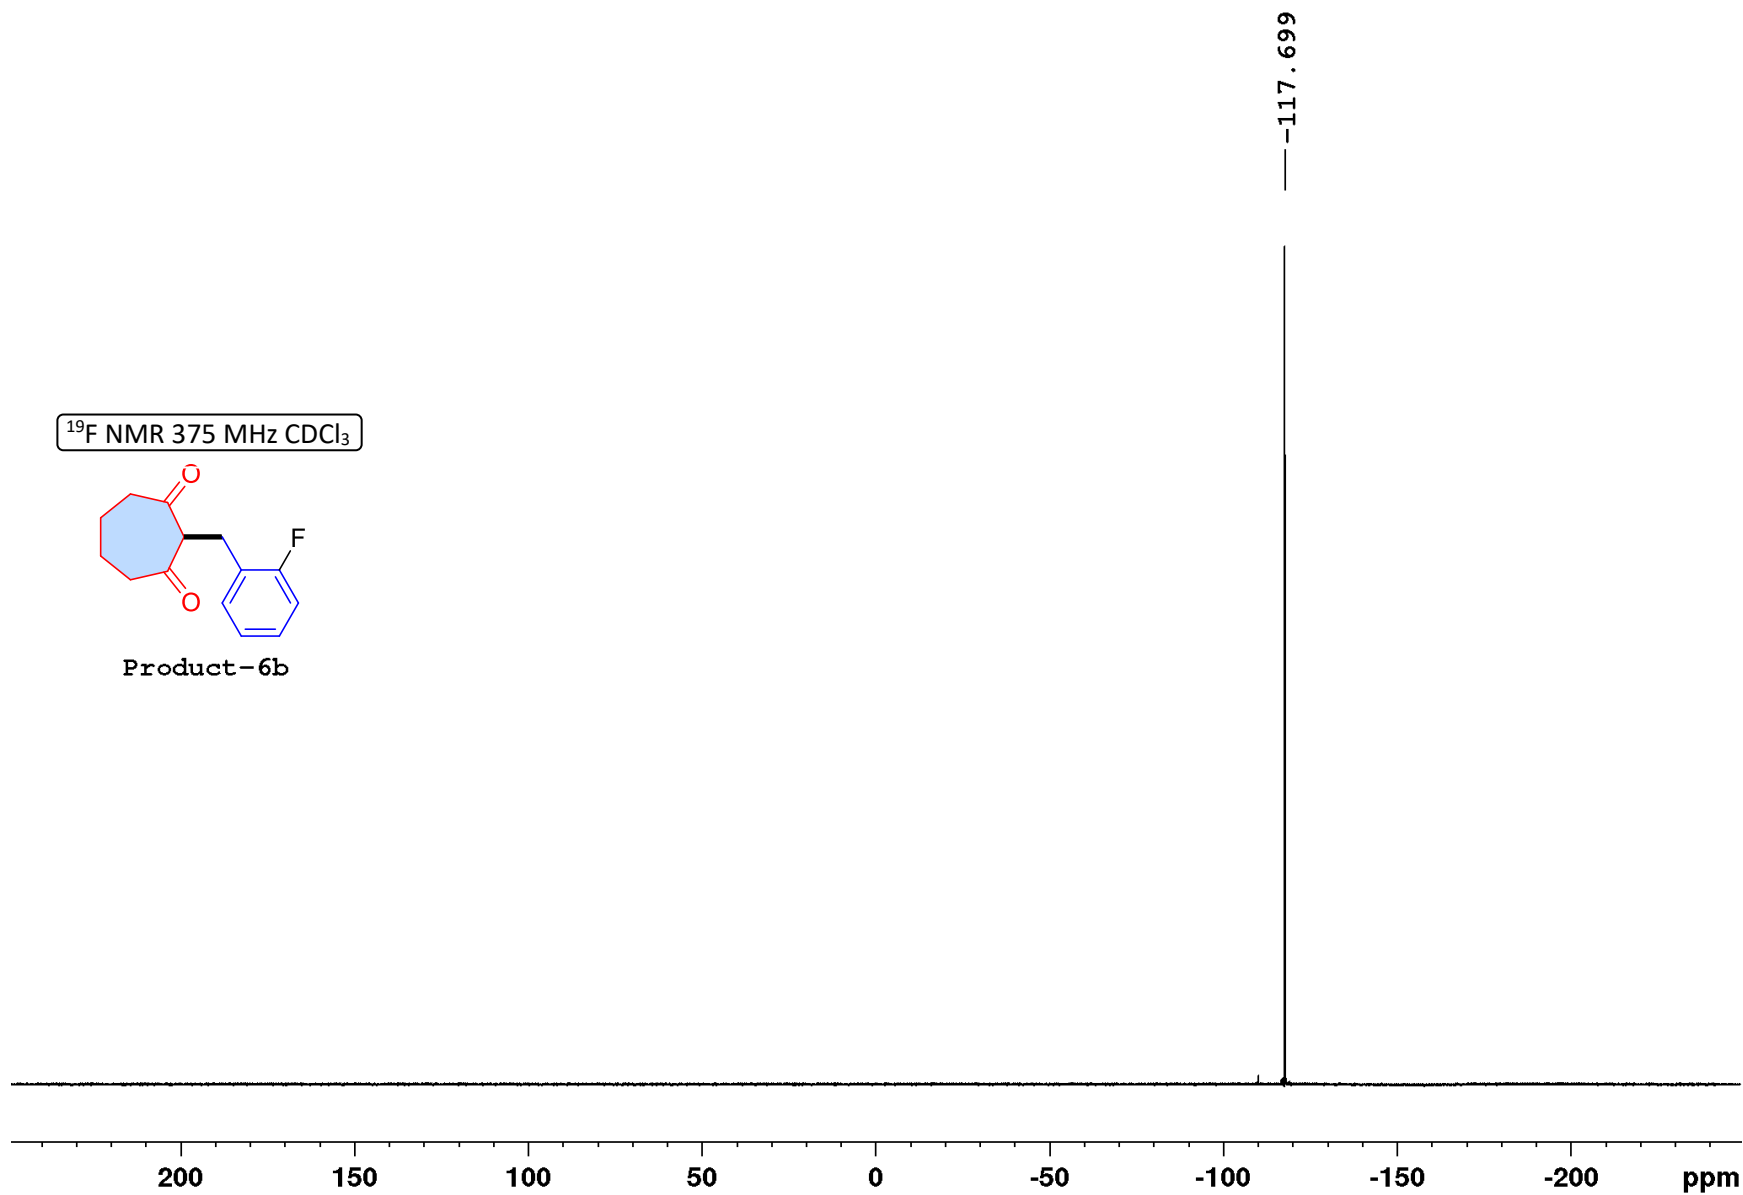

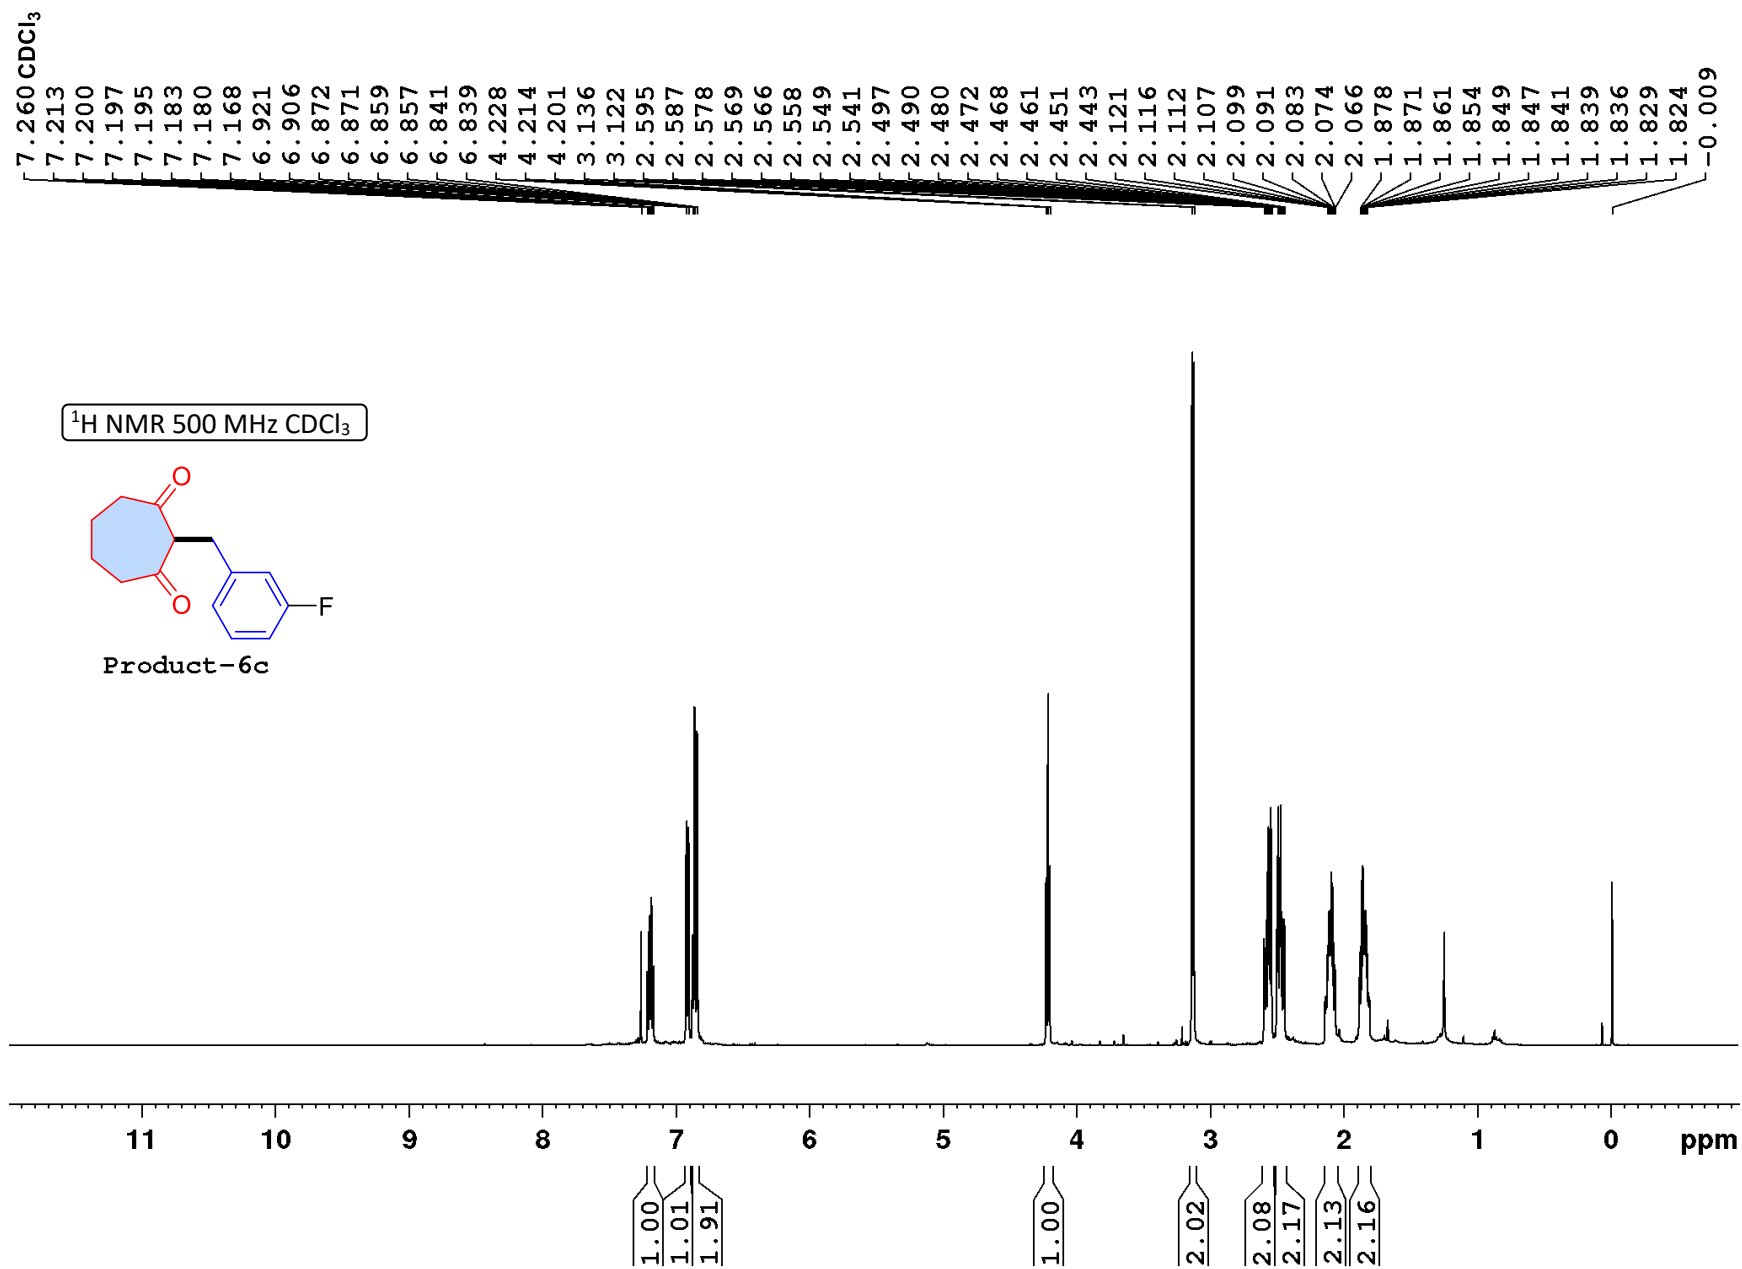

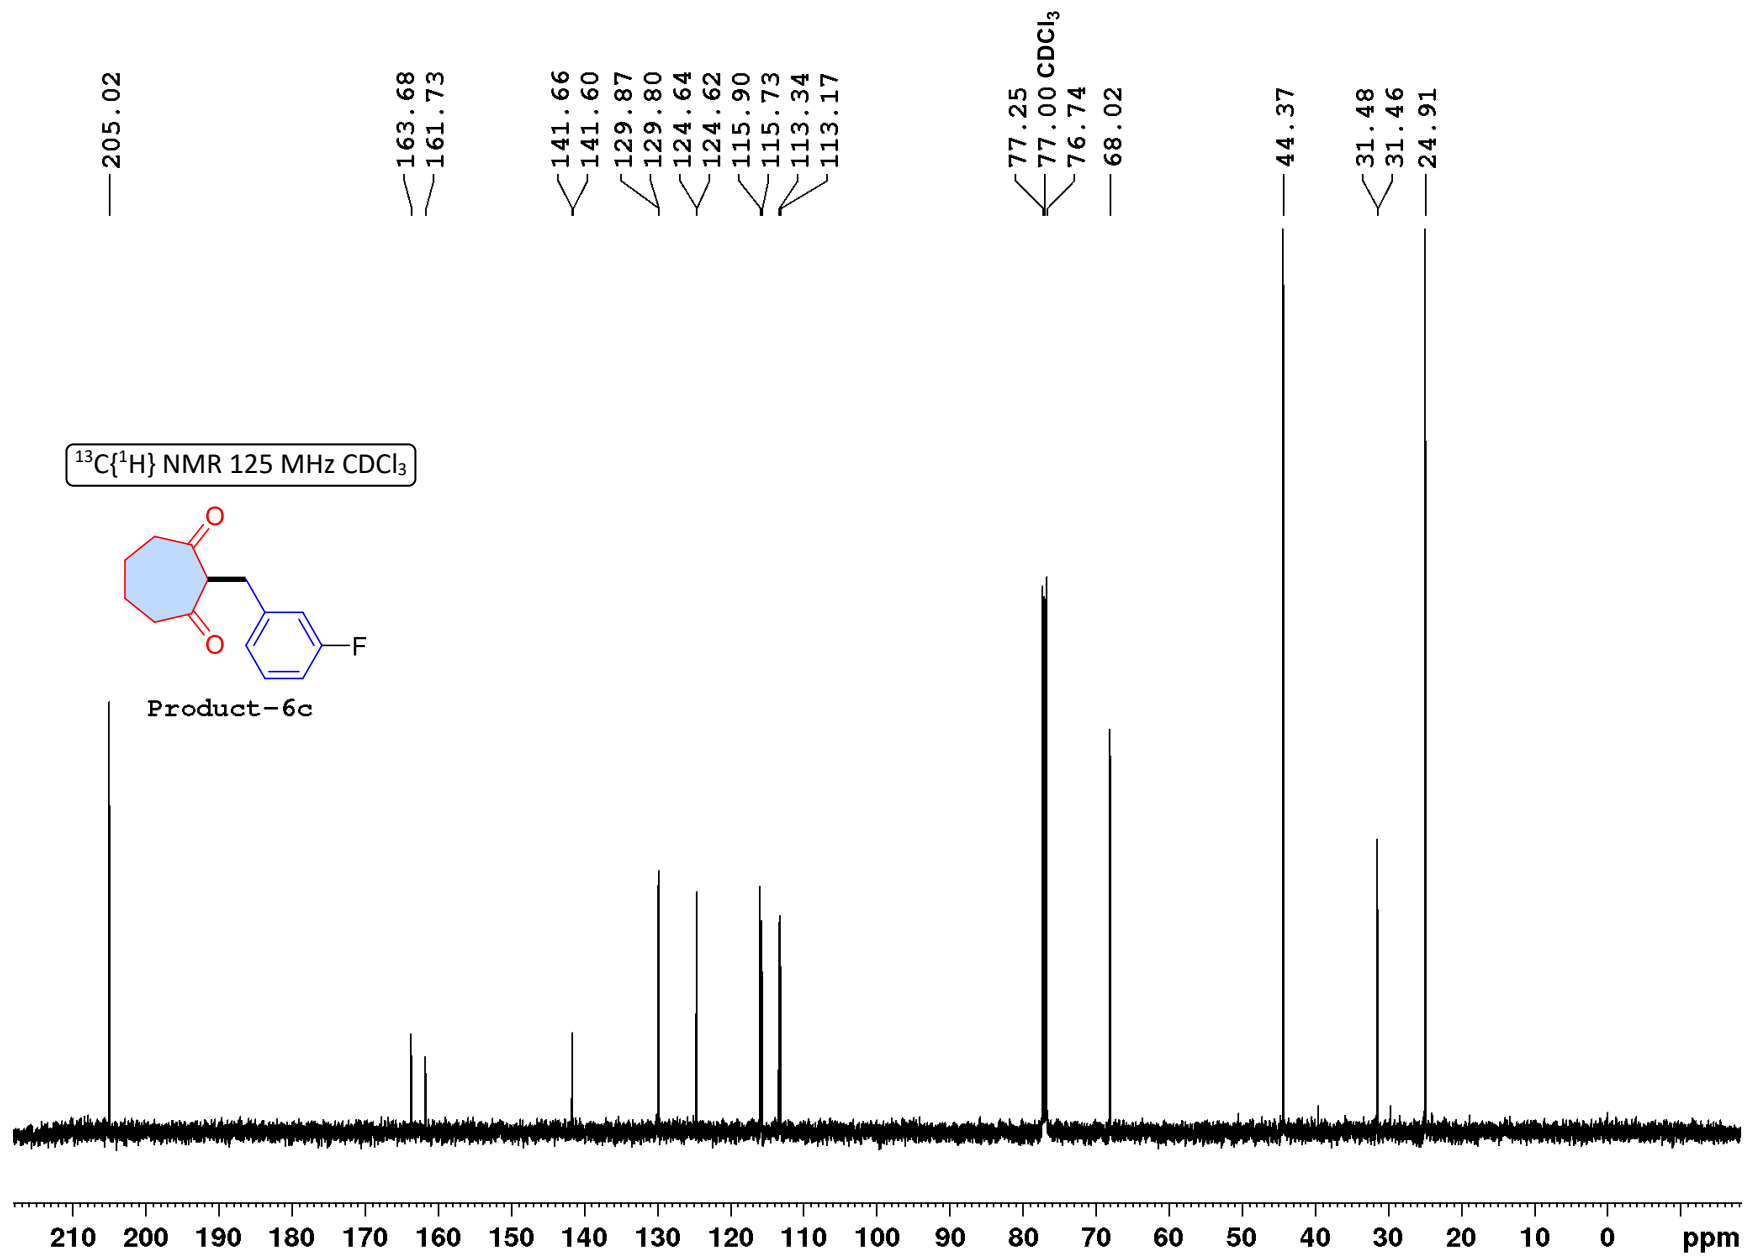



DEPT-135 125 MHz CDCl<sub>3</sub>

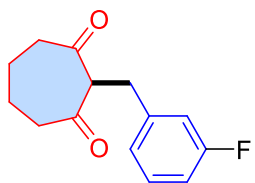

Product-6c

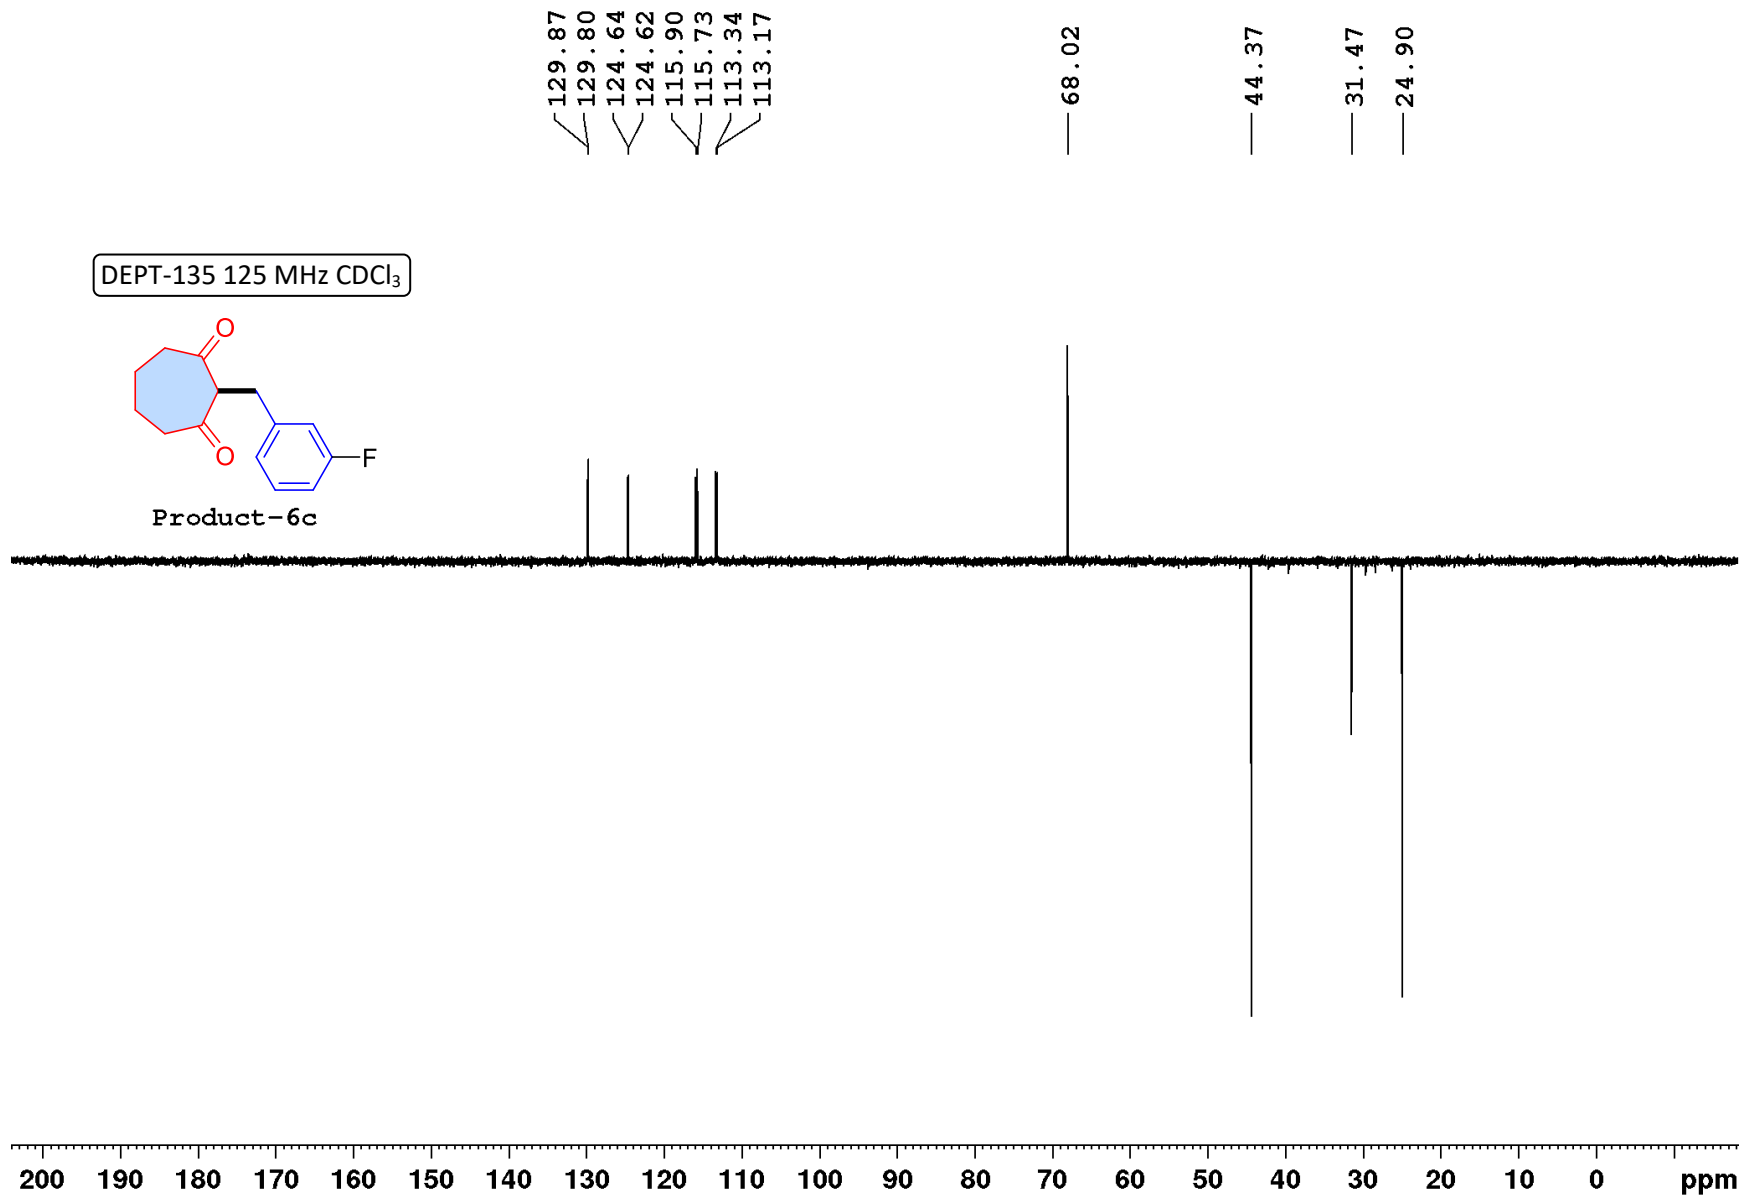

$^{19}\text{F}$  NMR 375 MHz  $\text{CDCl}_3$

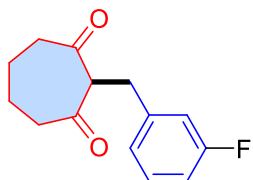

Product-6c

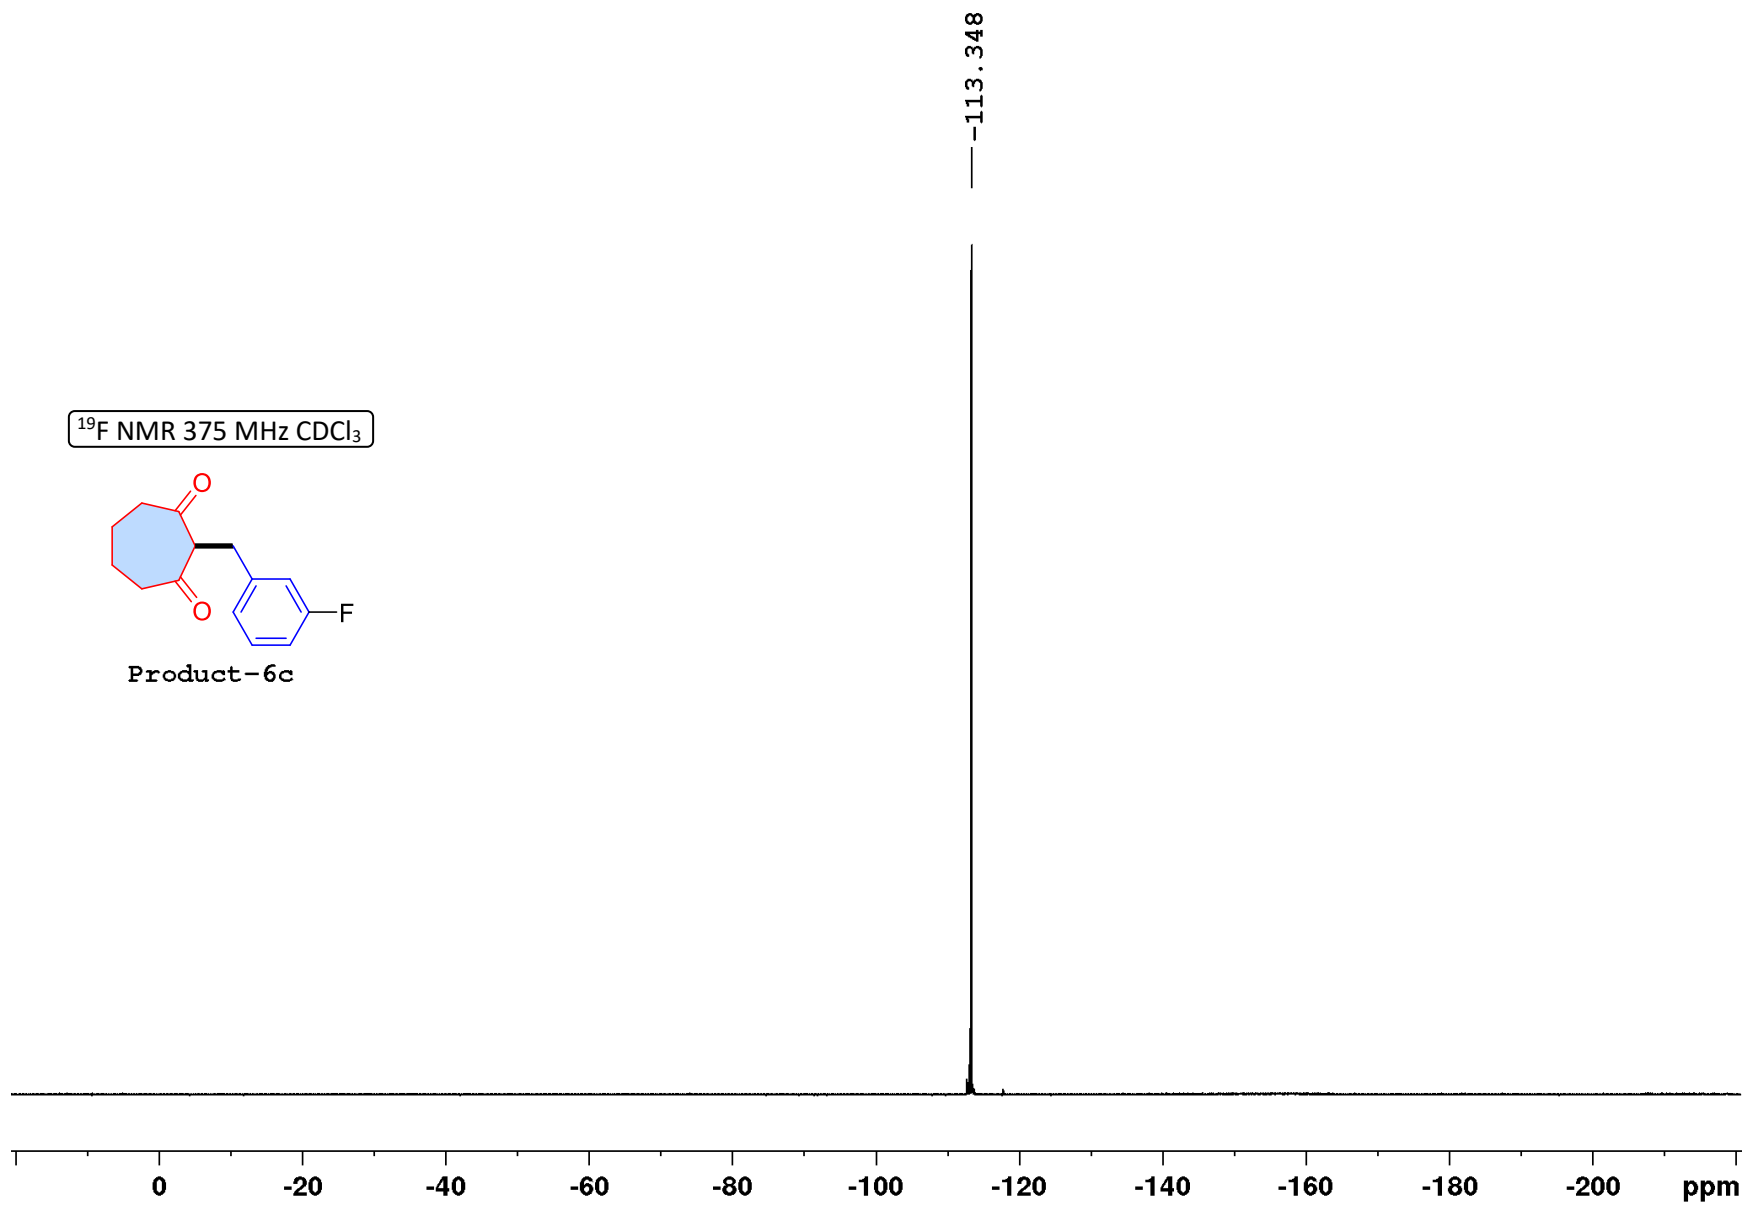

$^1\text{H}$  NMR 500 MHz  $\text{CDCl}_3$

$^1\text{H}$  NMR 500 MHz  $\text{CDCl}_3$

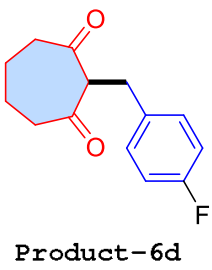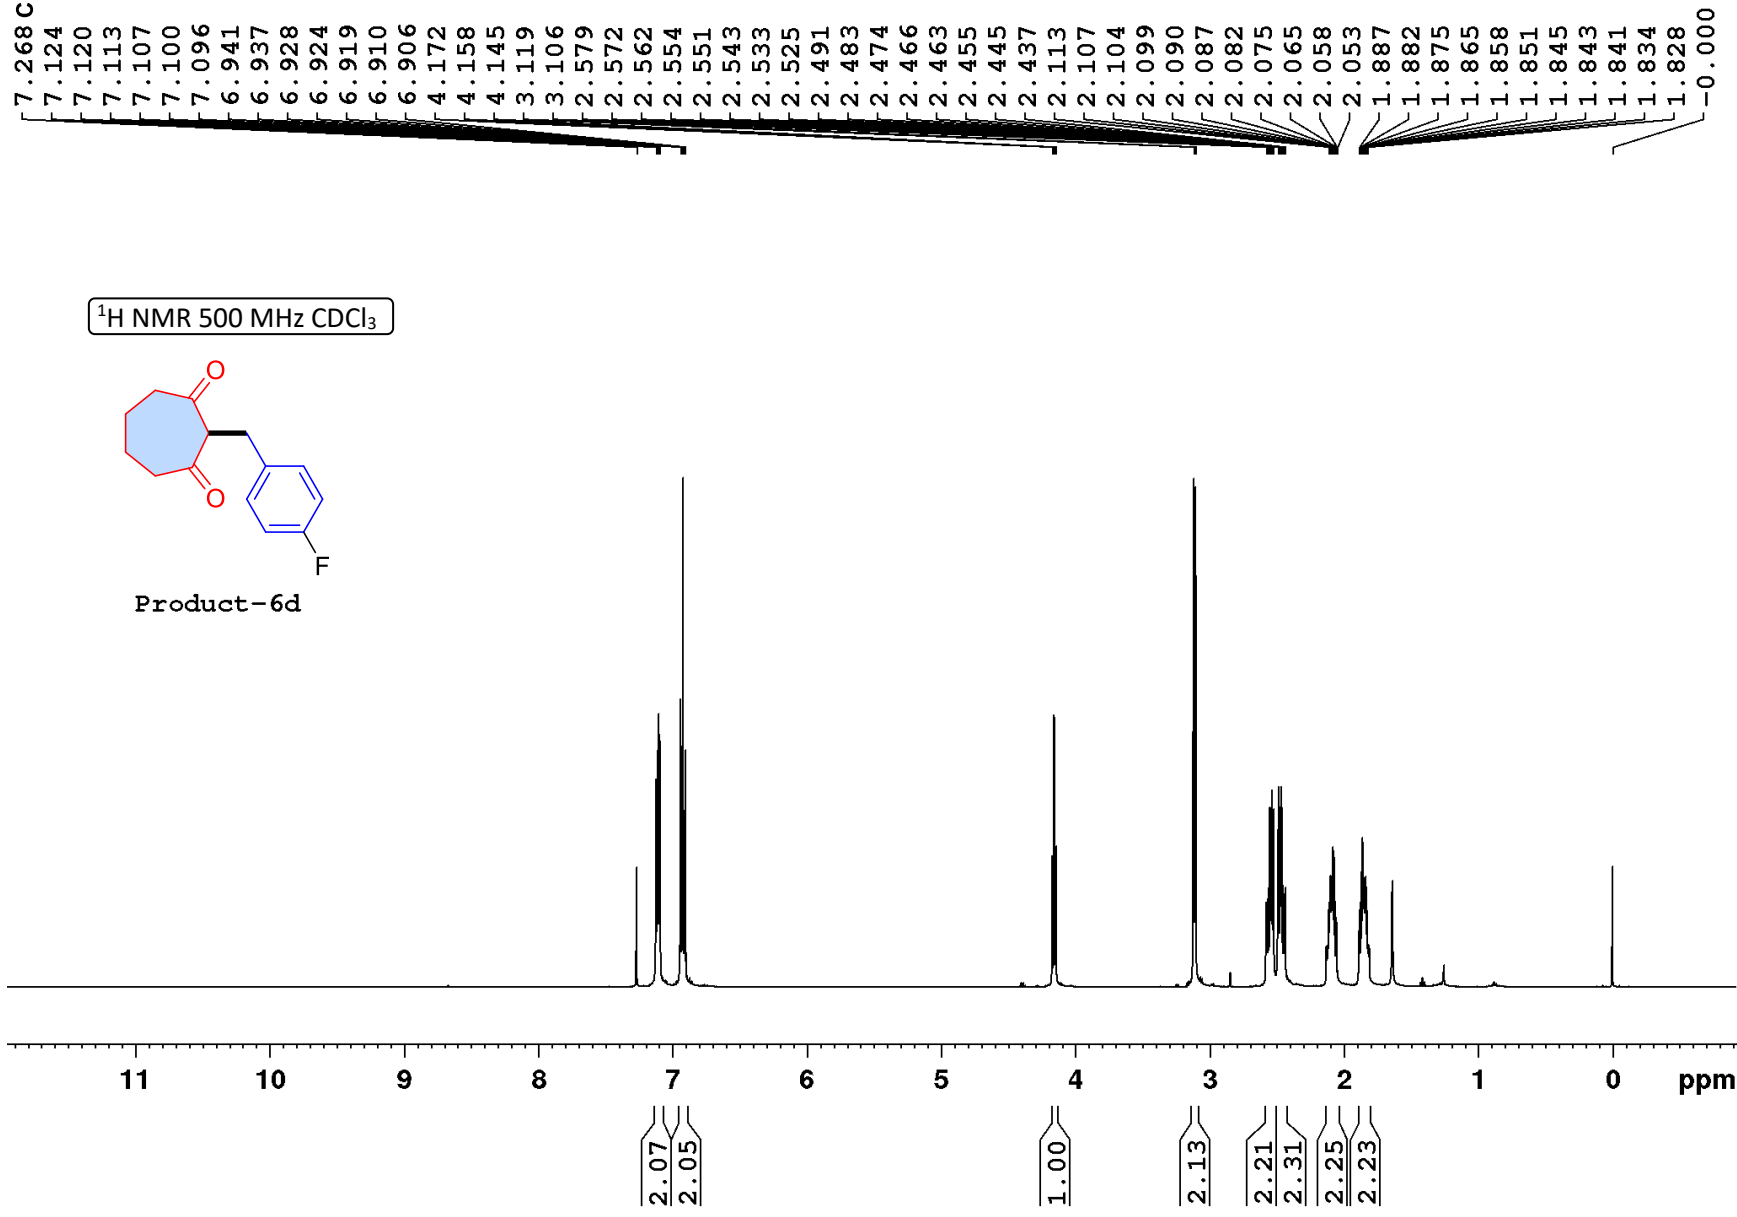

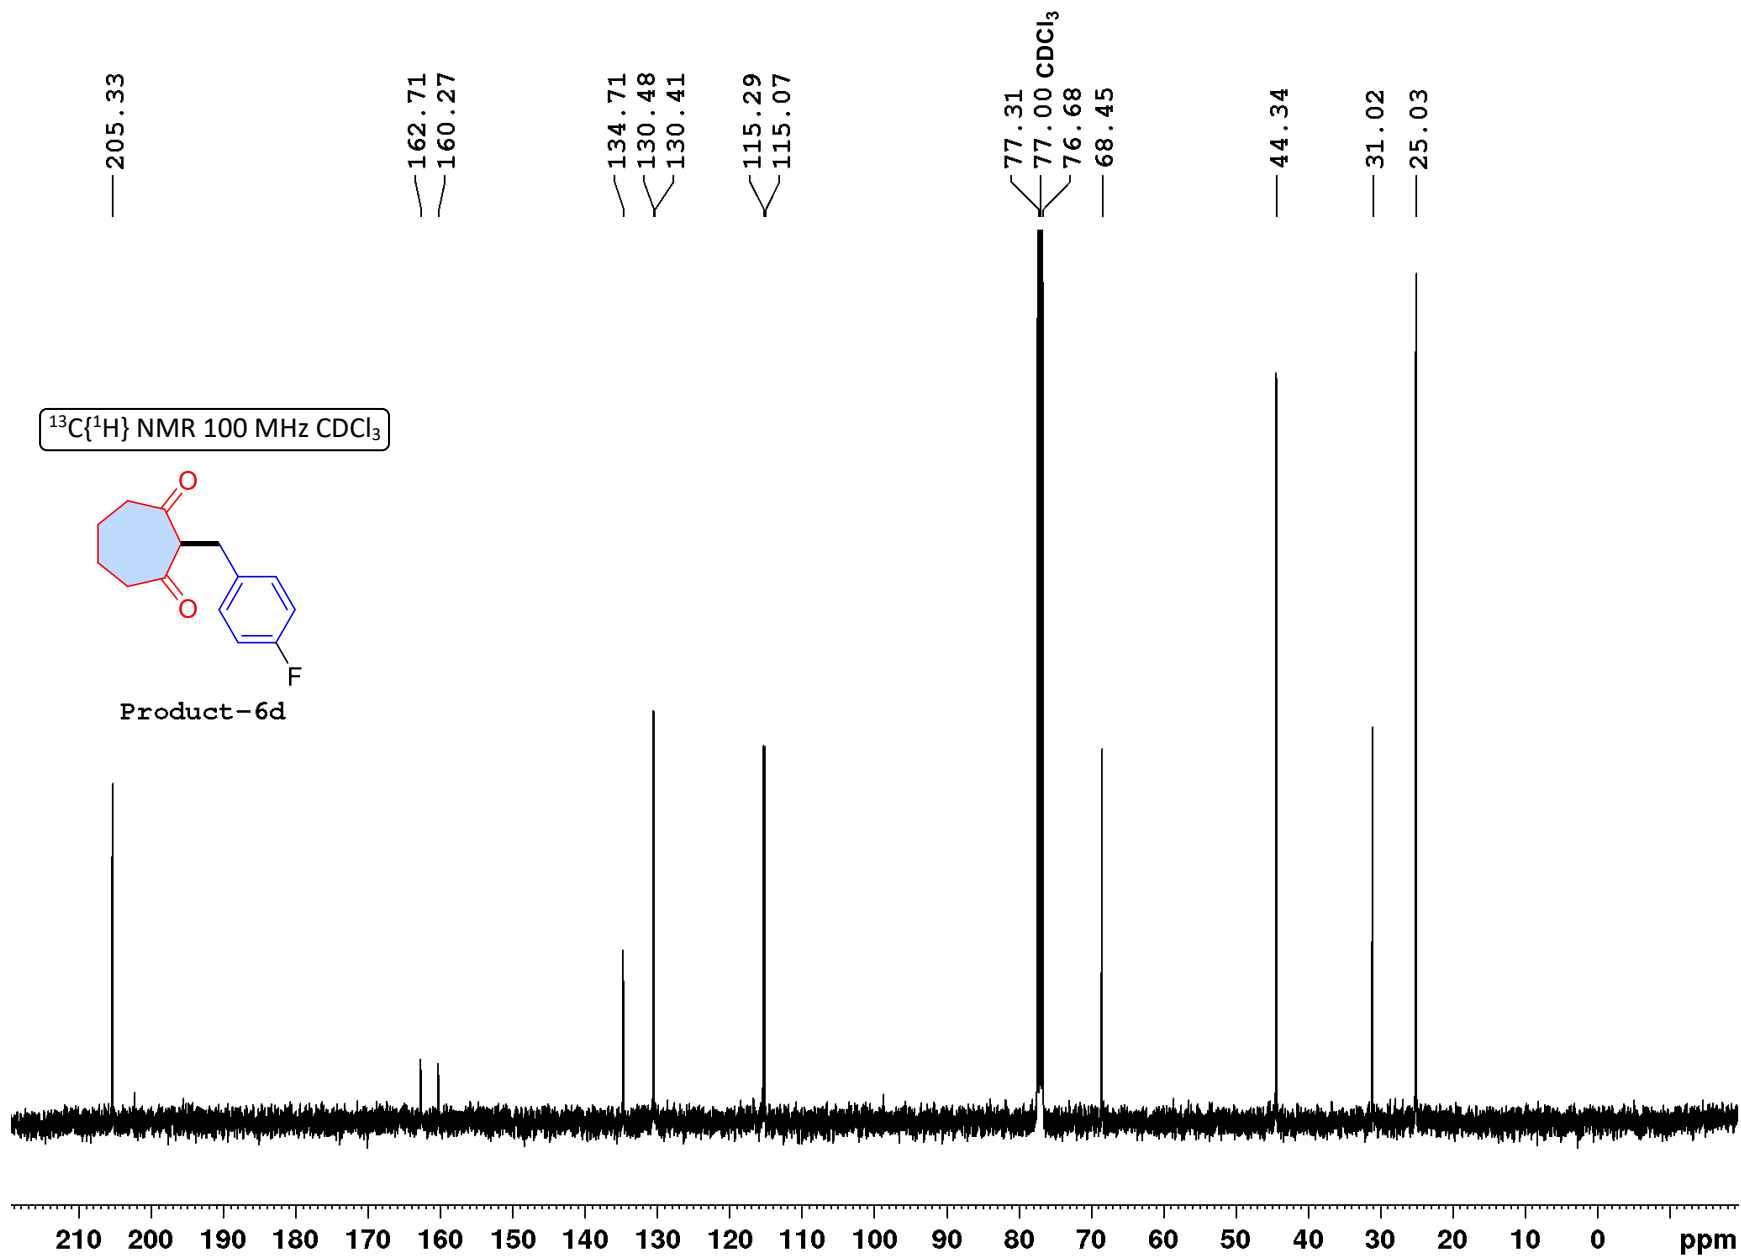

DEPT-135 100 MHz CDCl<sub>3</sub>

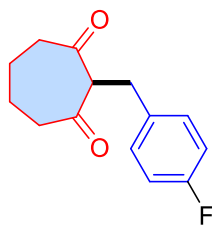

Product-6d

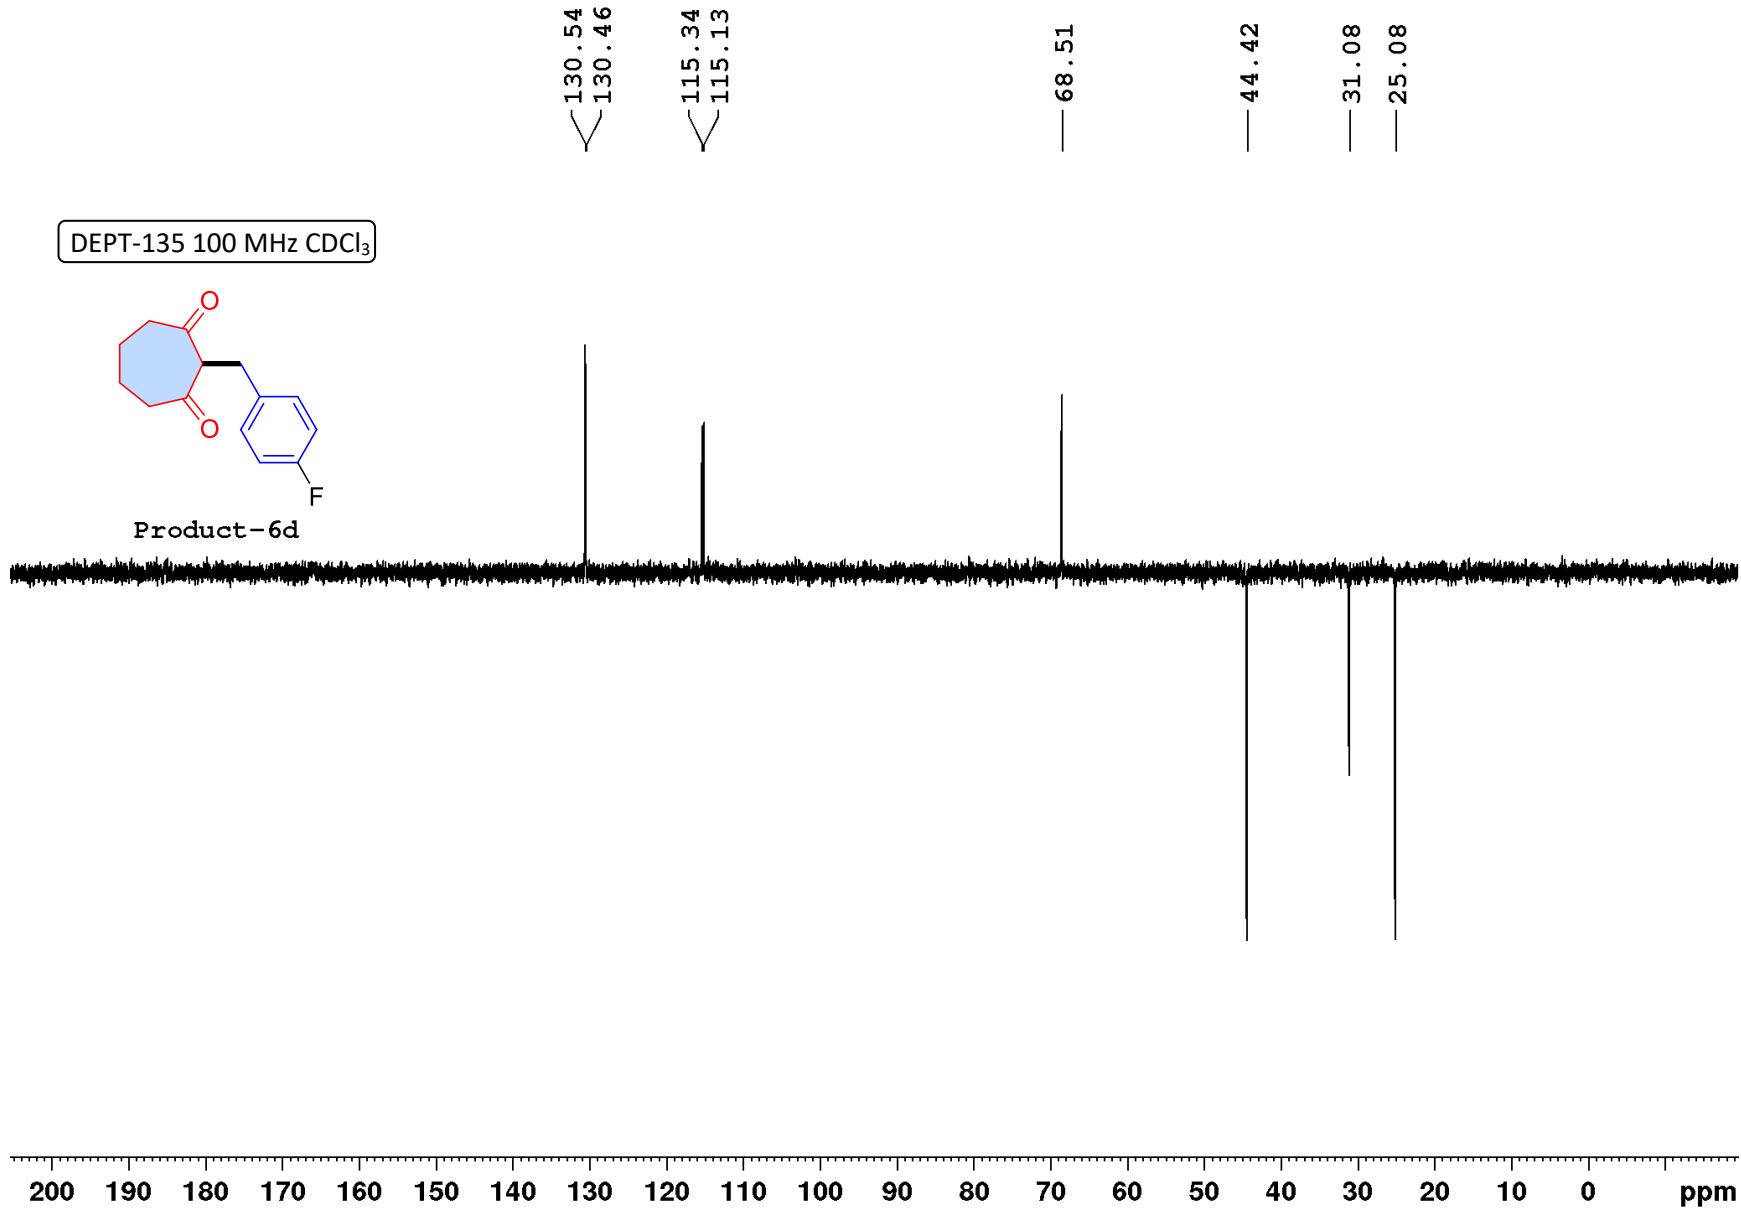

<sup>19</sup>F NMR 375 MHz CDCl<sub>3</sub>

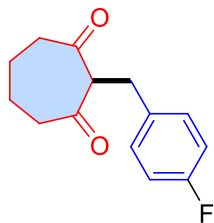

Product-6d

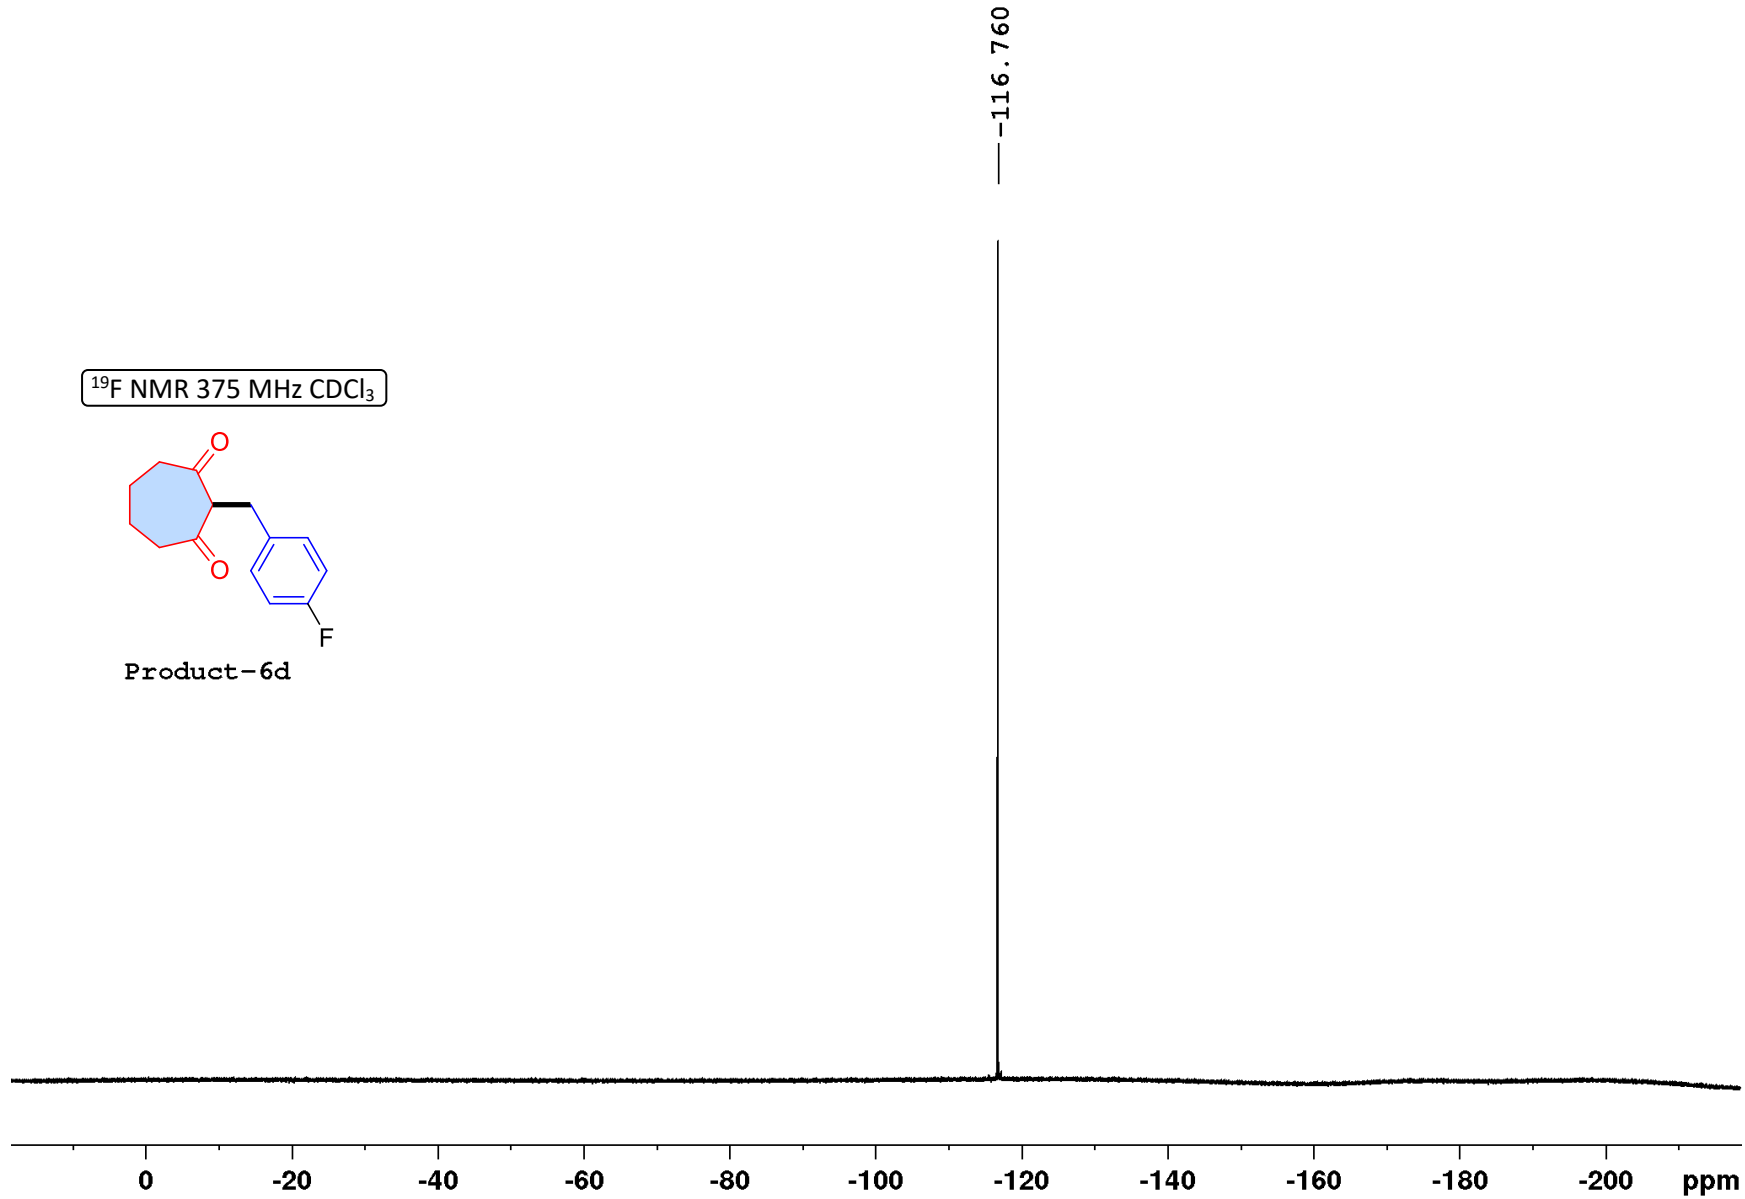

<sup>1</sup>H NMR 500 MHz CDCl<sub>3</sub>

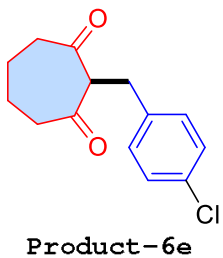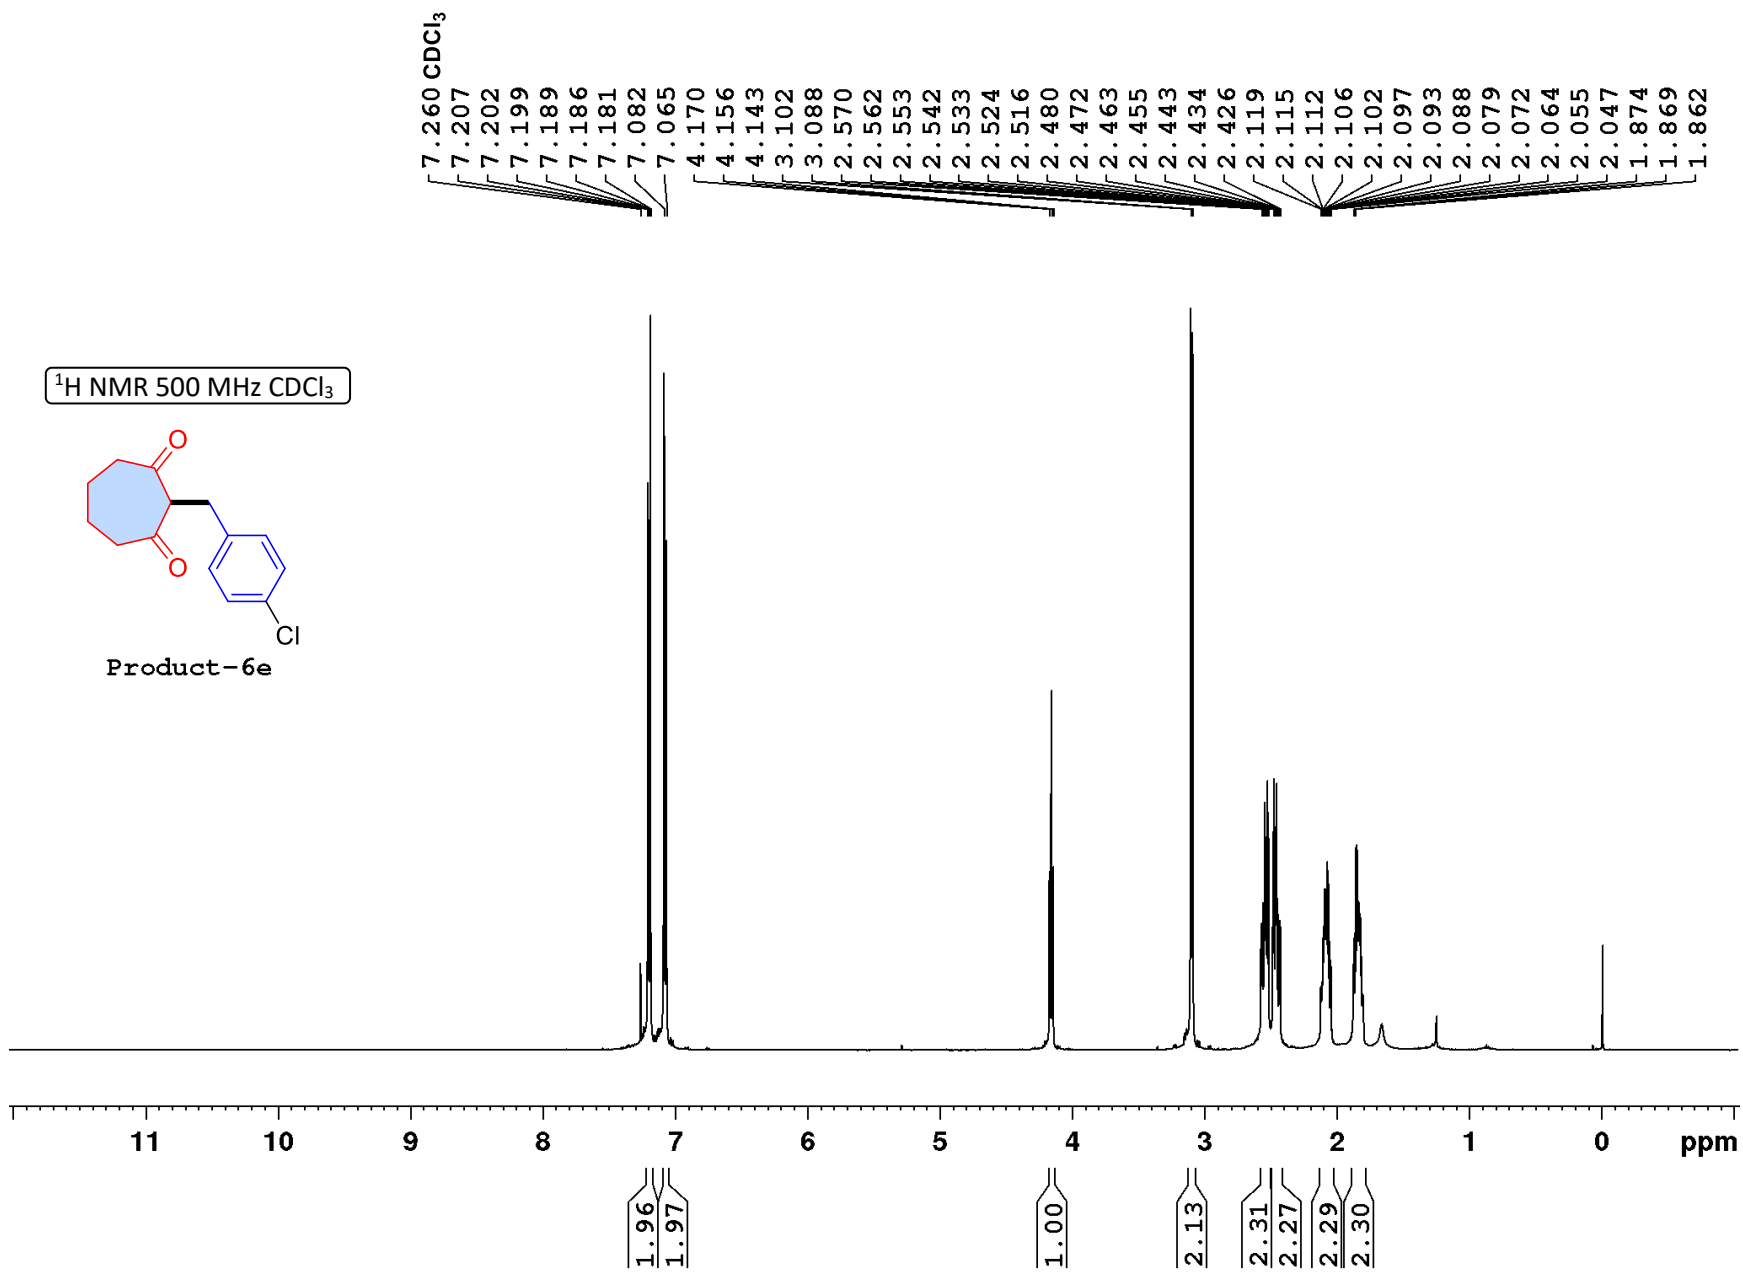

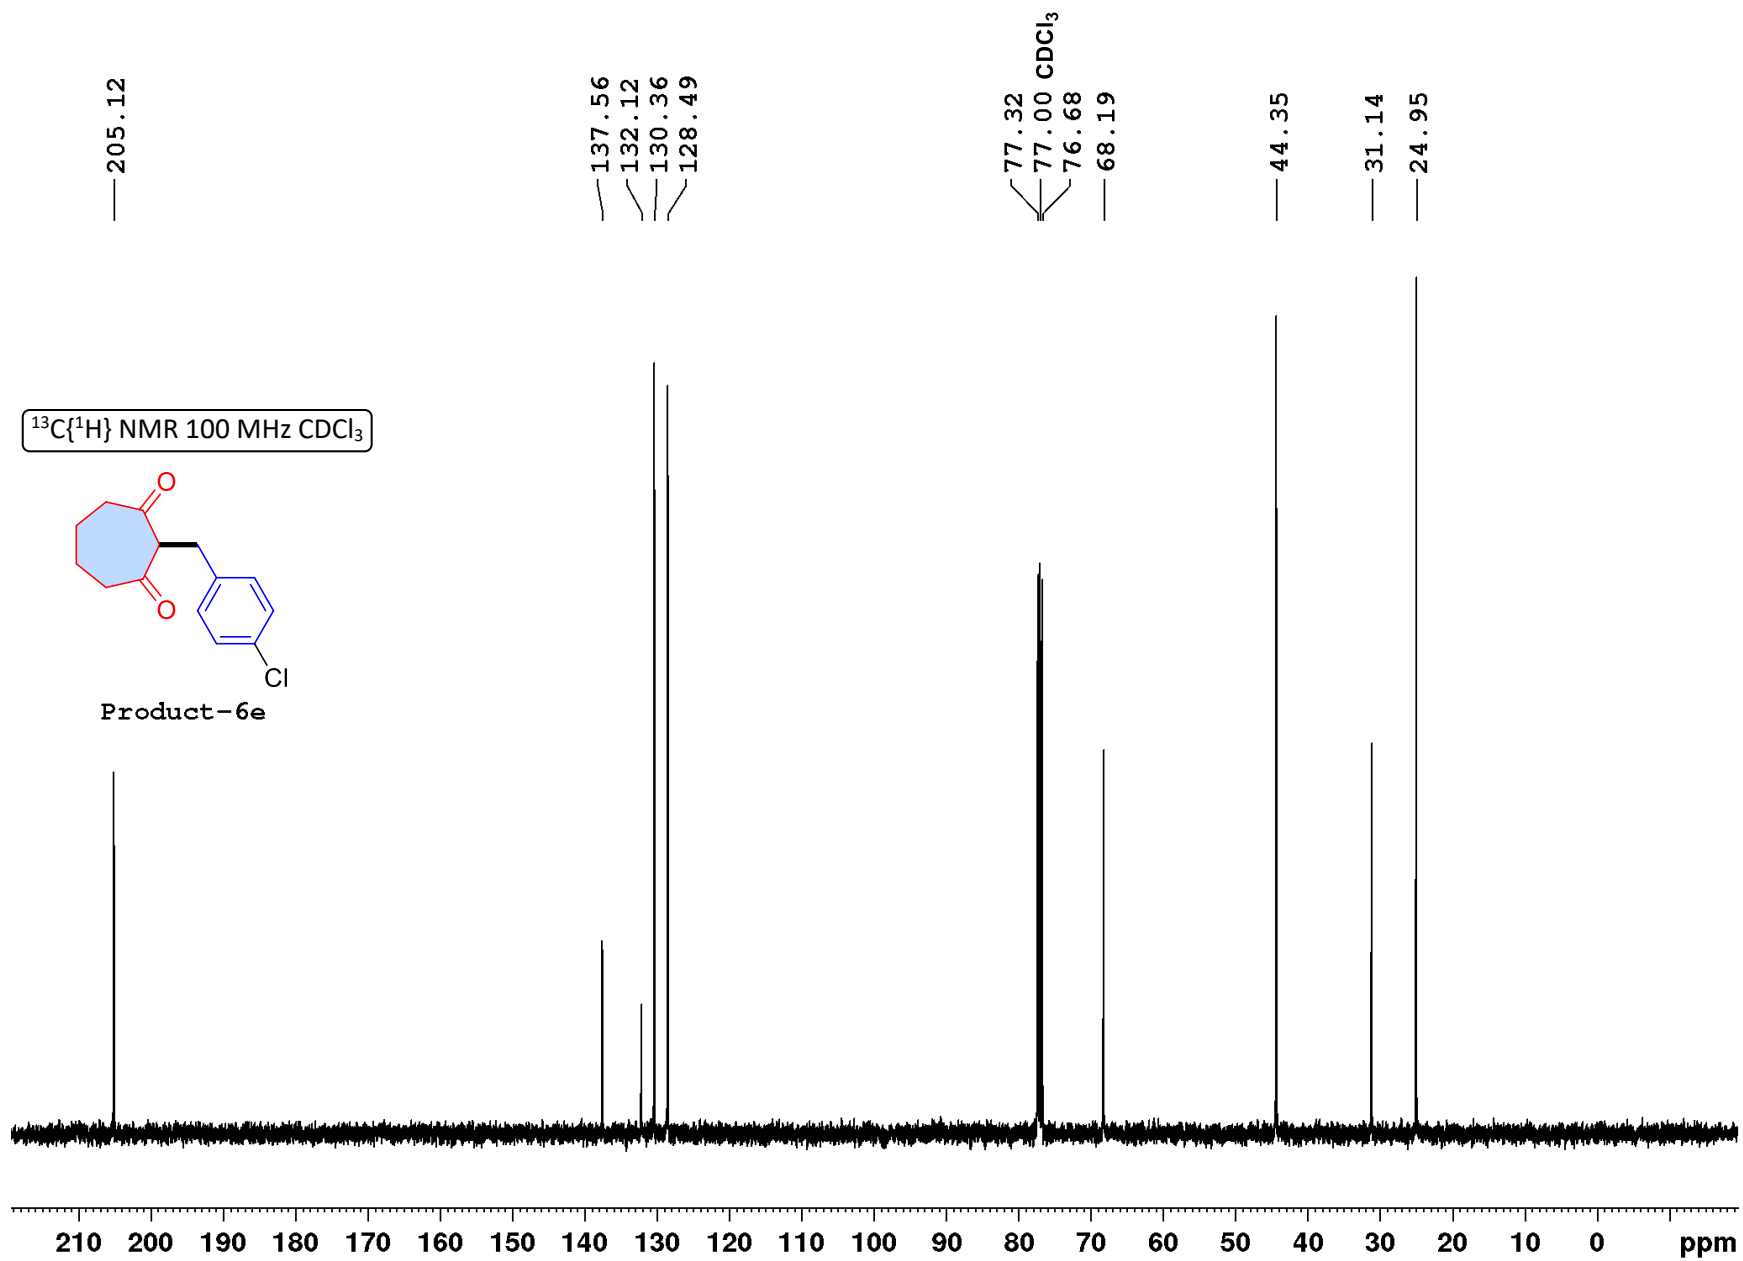



DEPT-135 100 MHz CDCl<sub>3</sub>

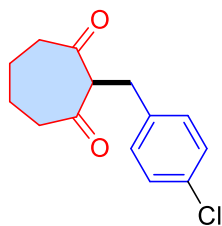

Product-6e

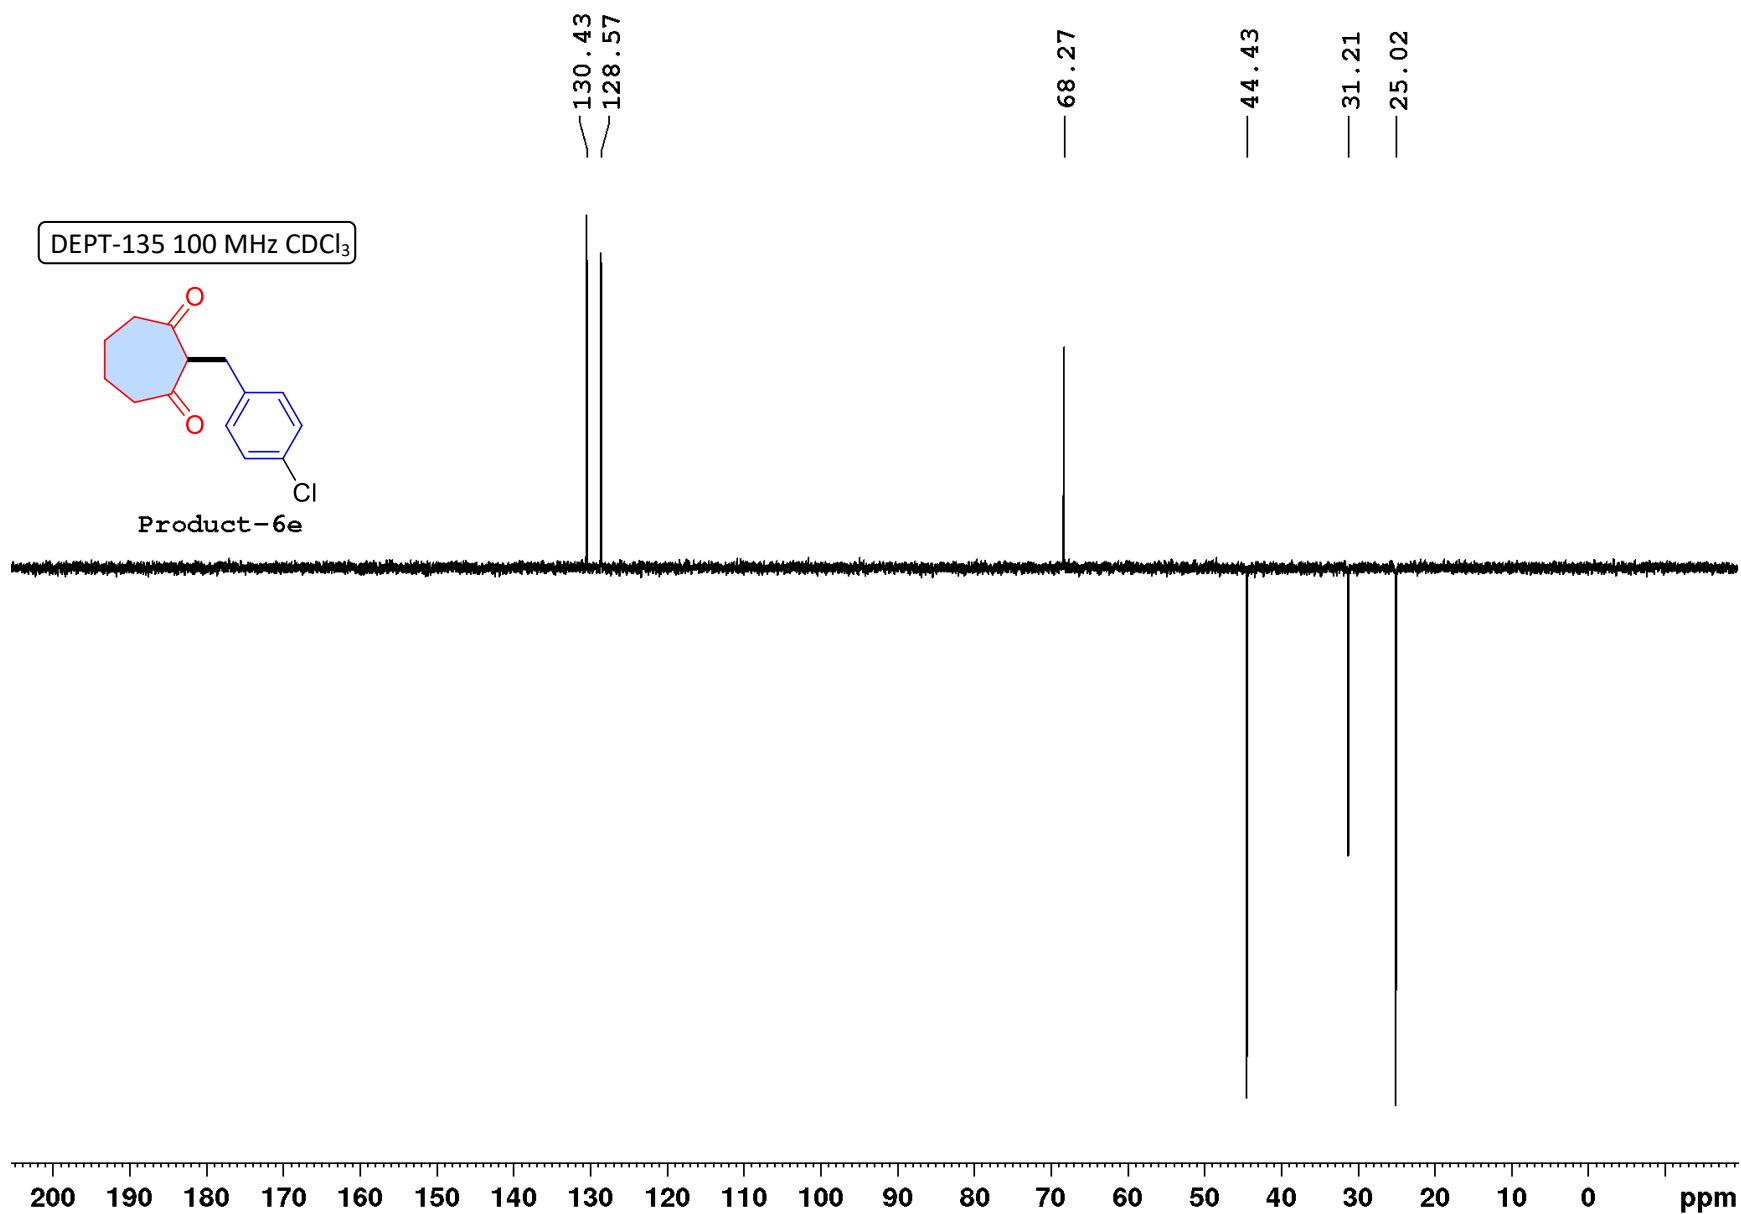

<sup>1</sup>H NMR 500 MHz CDCl<sub>3</sub>

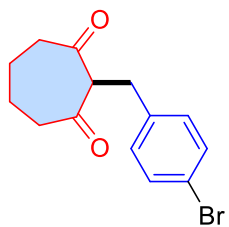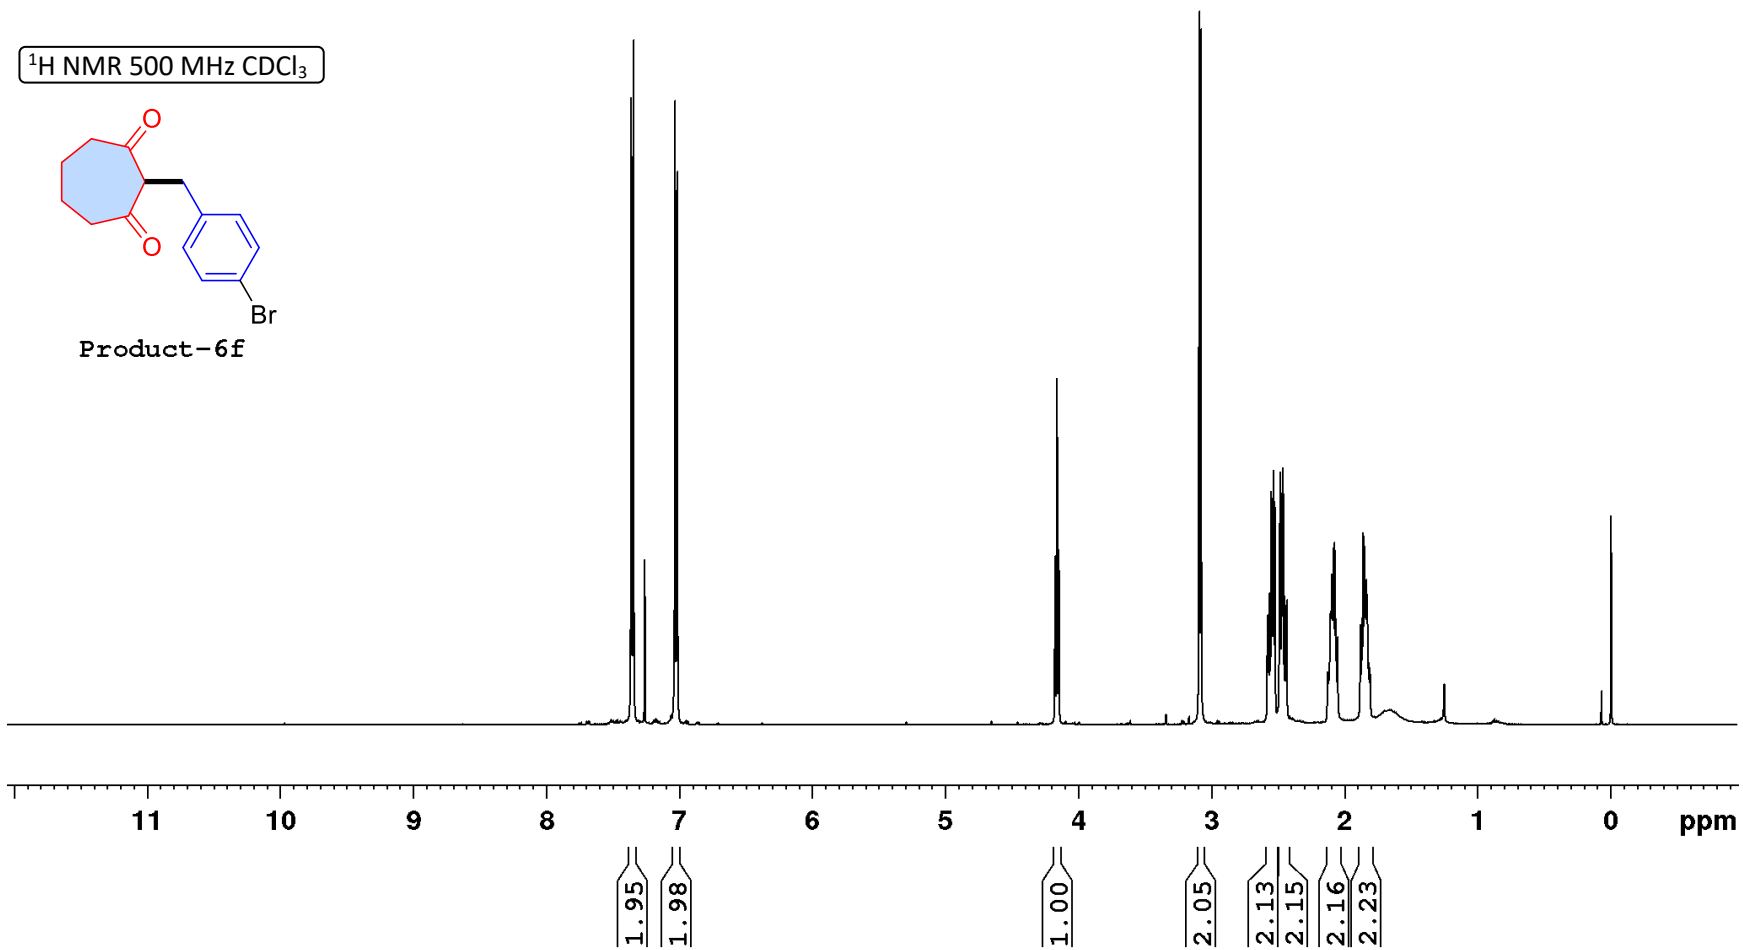

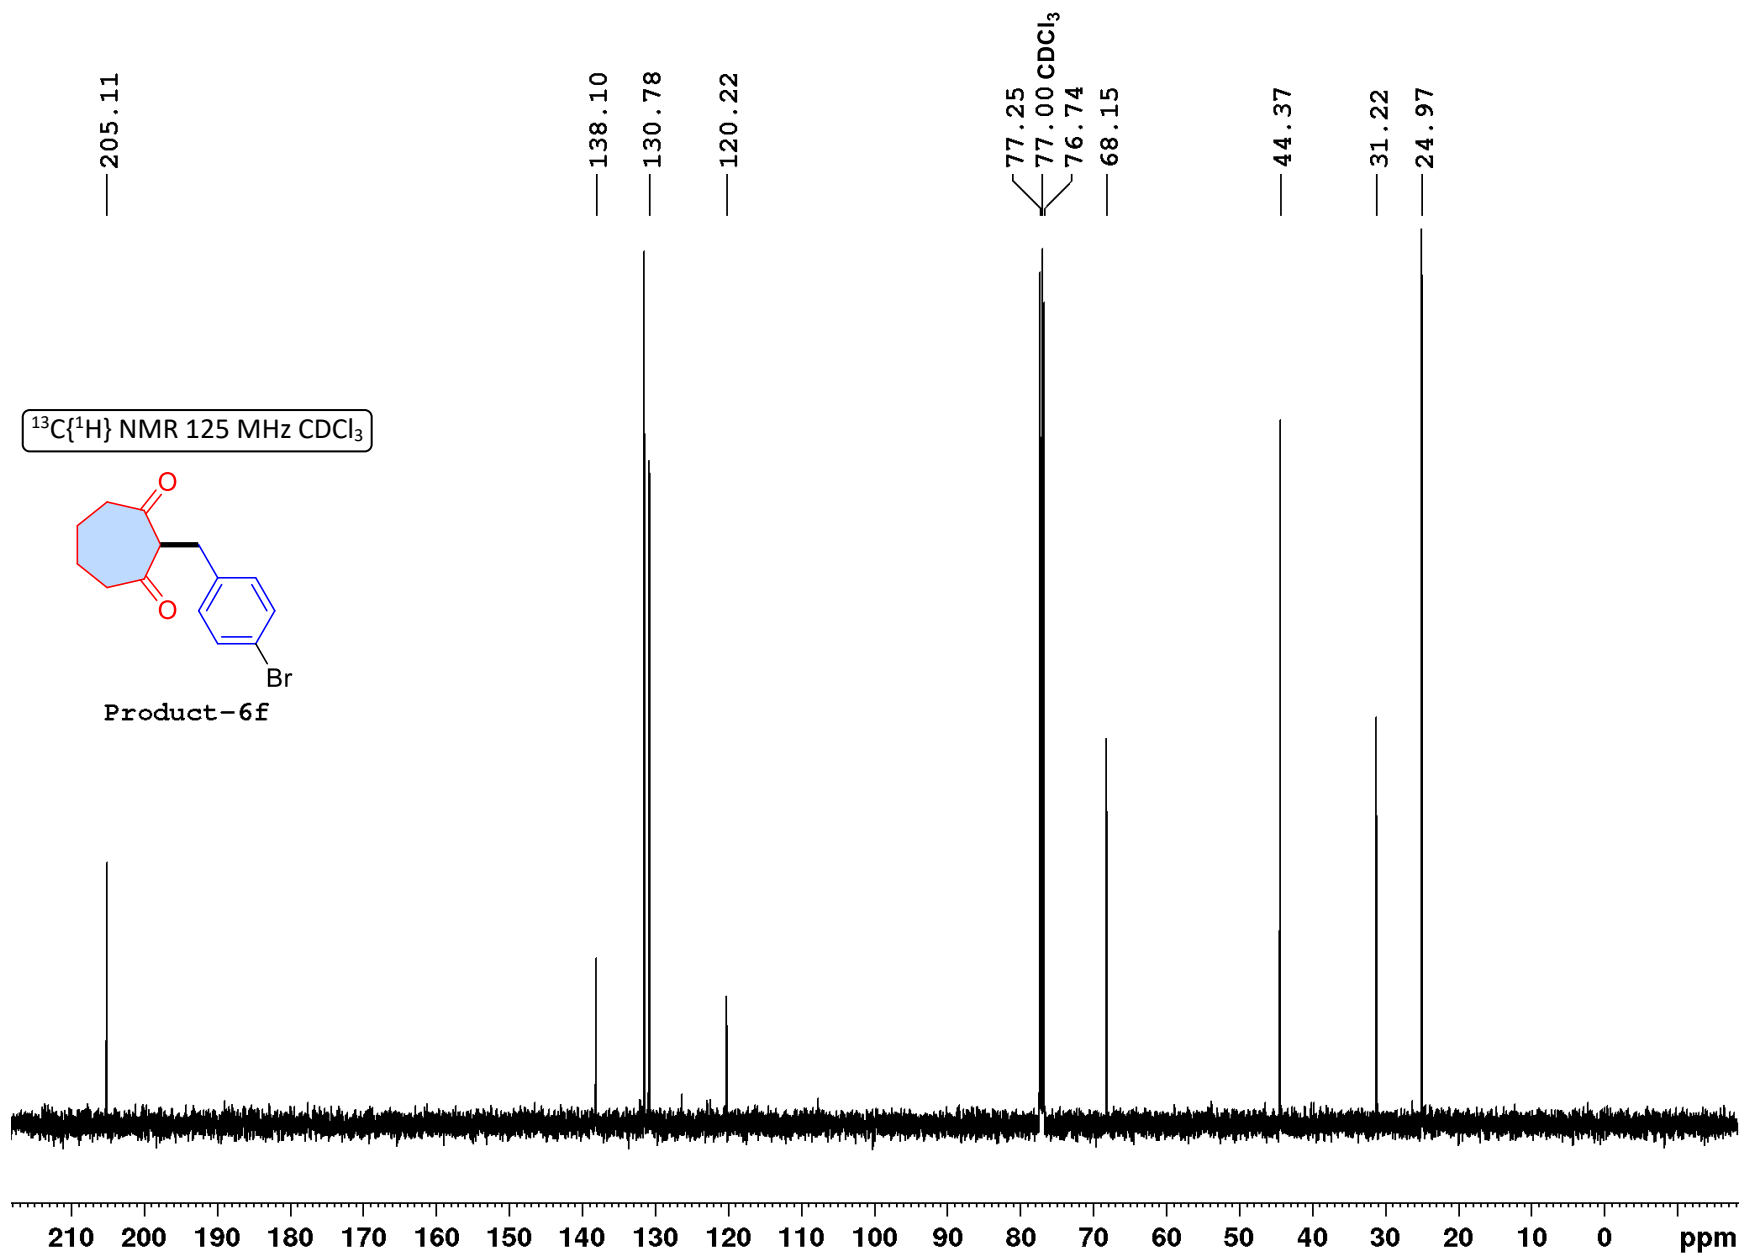

DEPT-135 125 MHz CDCl<sub>3</sub>

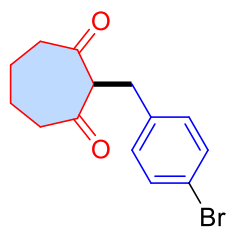

Product-6f

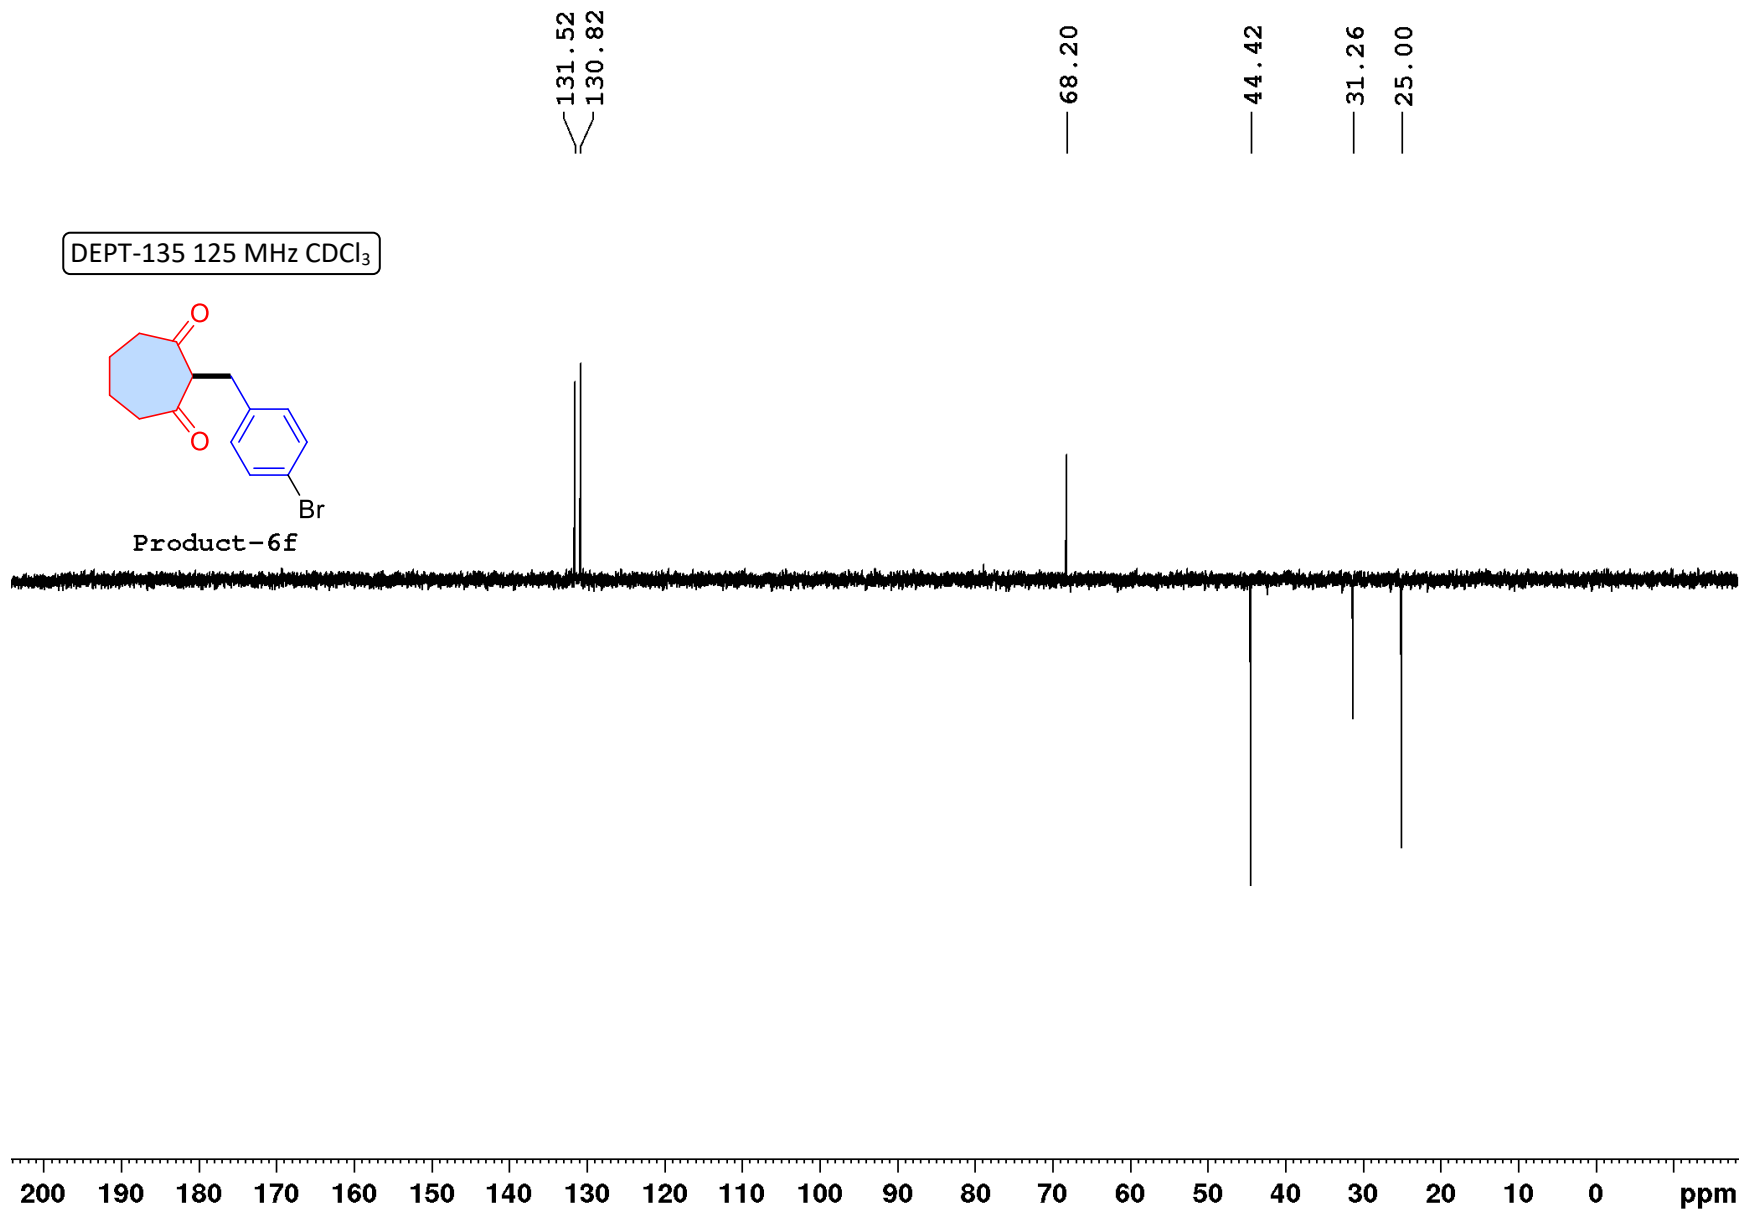

7.260 CDCl<sub>3</sub>

7.128  
7.122  
7.109  
7.102  
7.093  
7.089  
7.082  
7.075  
7.071  
7.061  
7.055  
7.042  
7.036  
4.167  
4.154  
4.141  
3.168  
3.154  
2.609  
2.601  
2.592  
2.584  
2.581  
2.573  
2.564  
2.555  
2.538  
2.530  
2.521  
2.513  
2.510  
2.502  
2.492  
2.485  
2.304  
2.115  
2.109  
2.107  
2.100  
2.092  
2.090  
2.085  
2.077  
2.068  
2.060  
2.056  
1.906  
1.899  
1.889  
1.881  
1.875  
1.867  
1.864  
1.861  
1.857  
1.851  
1.848

<sup>1</sup>H NMR 500 MHz CDCl<sub>3</sub>

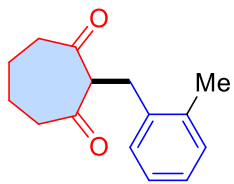

Product-6g

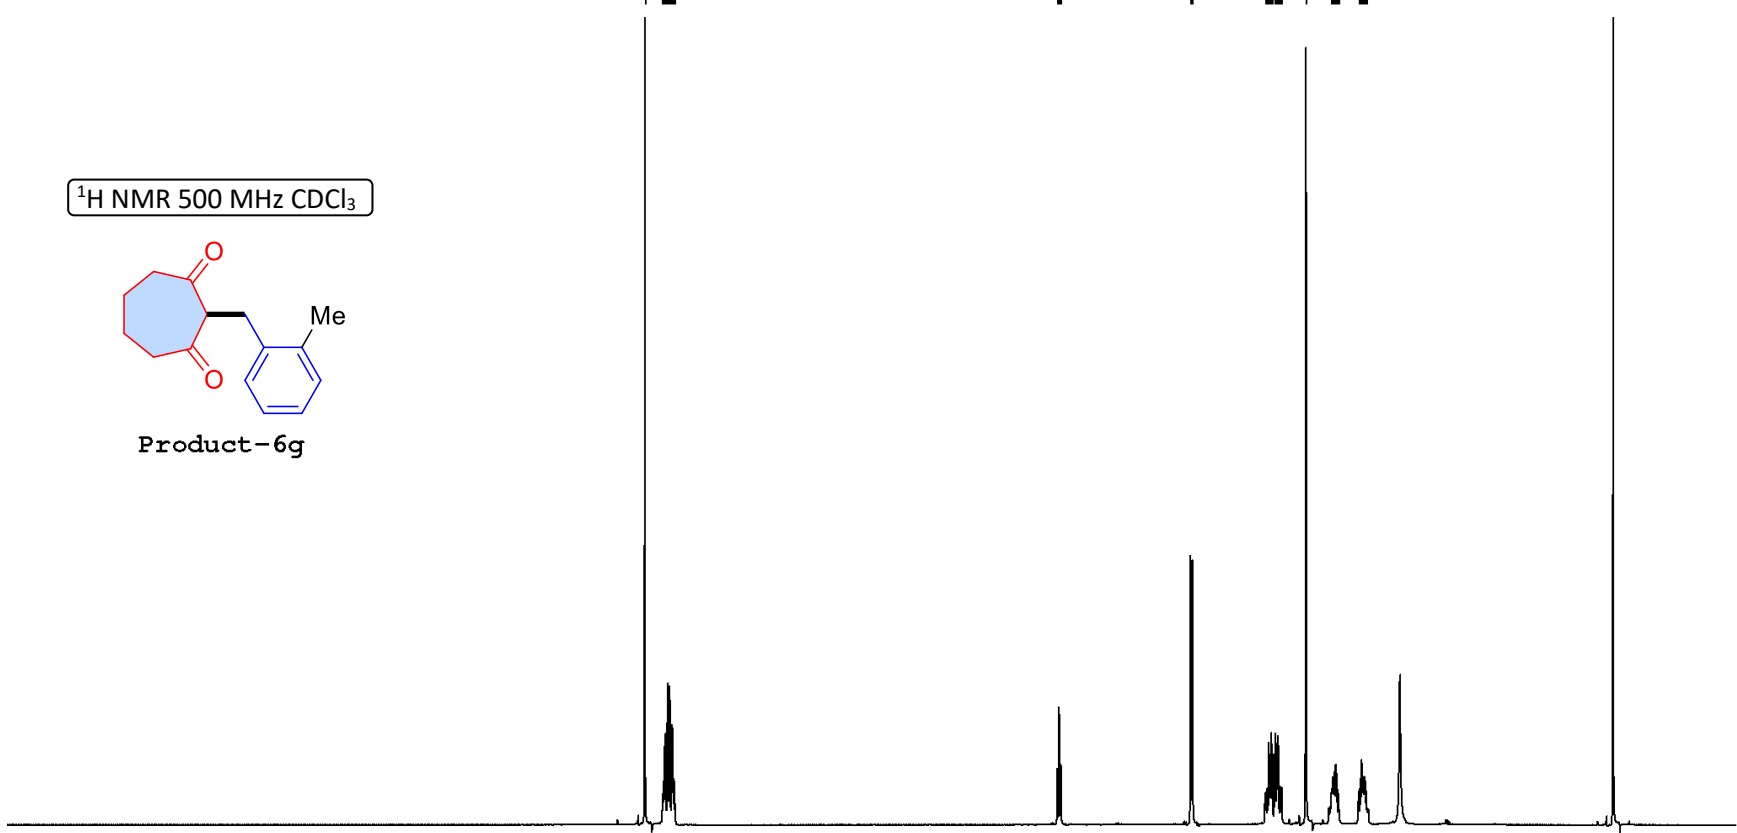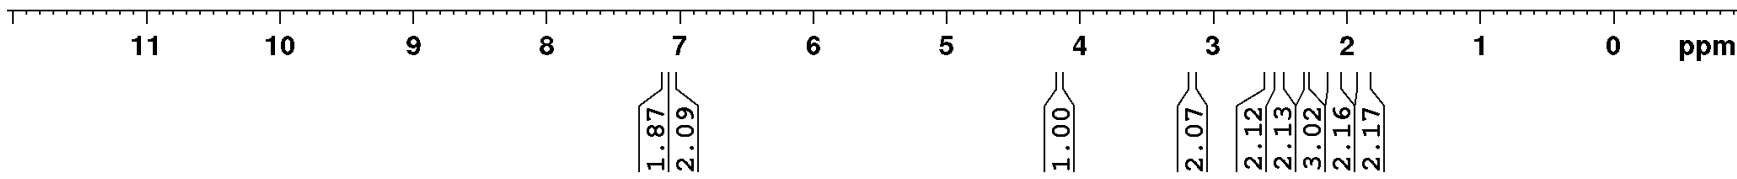

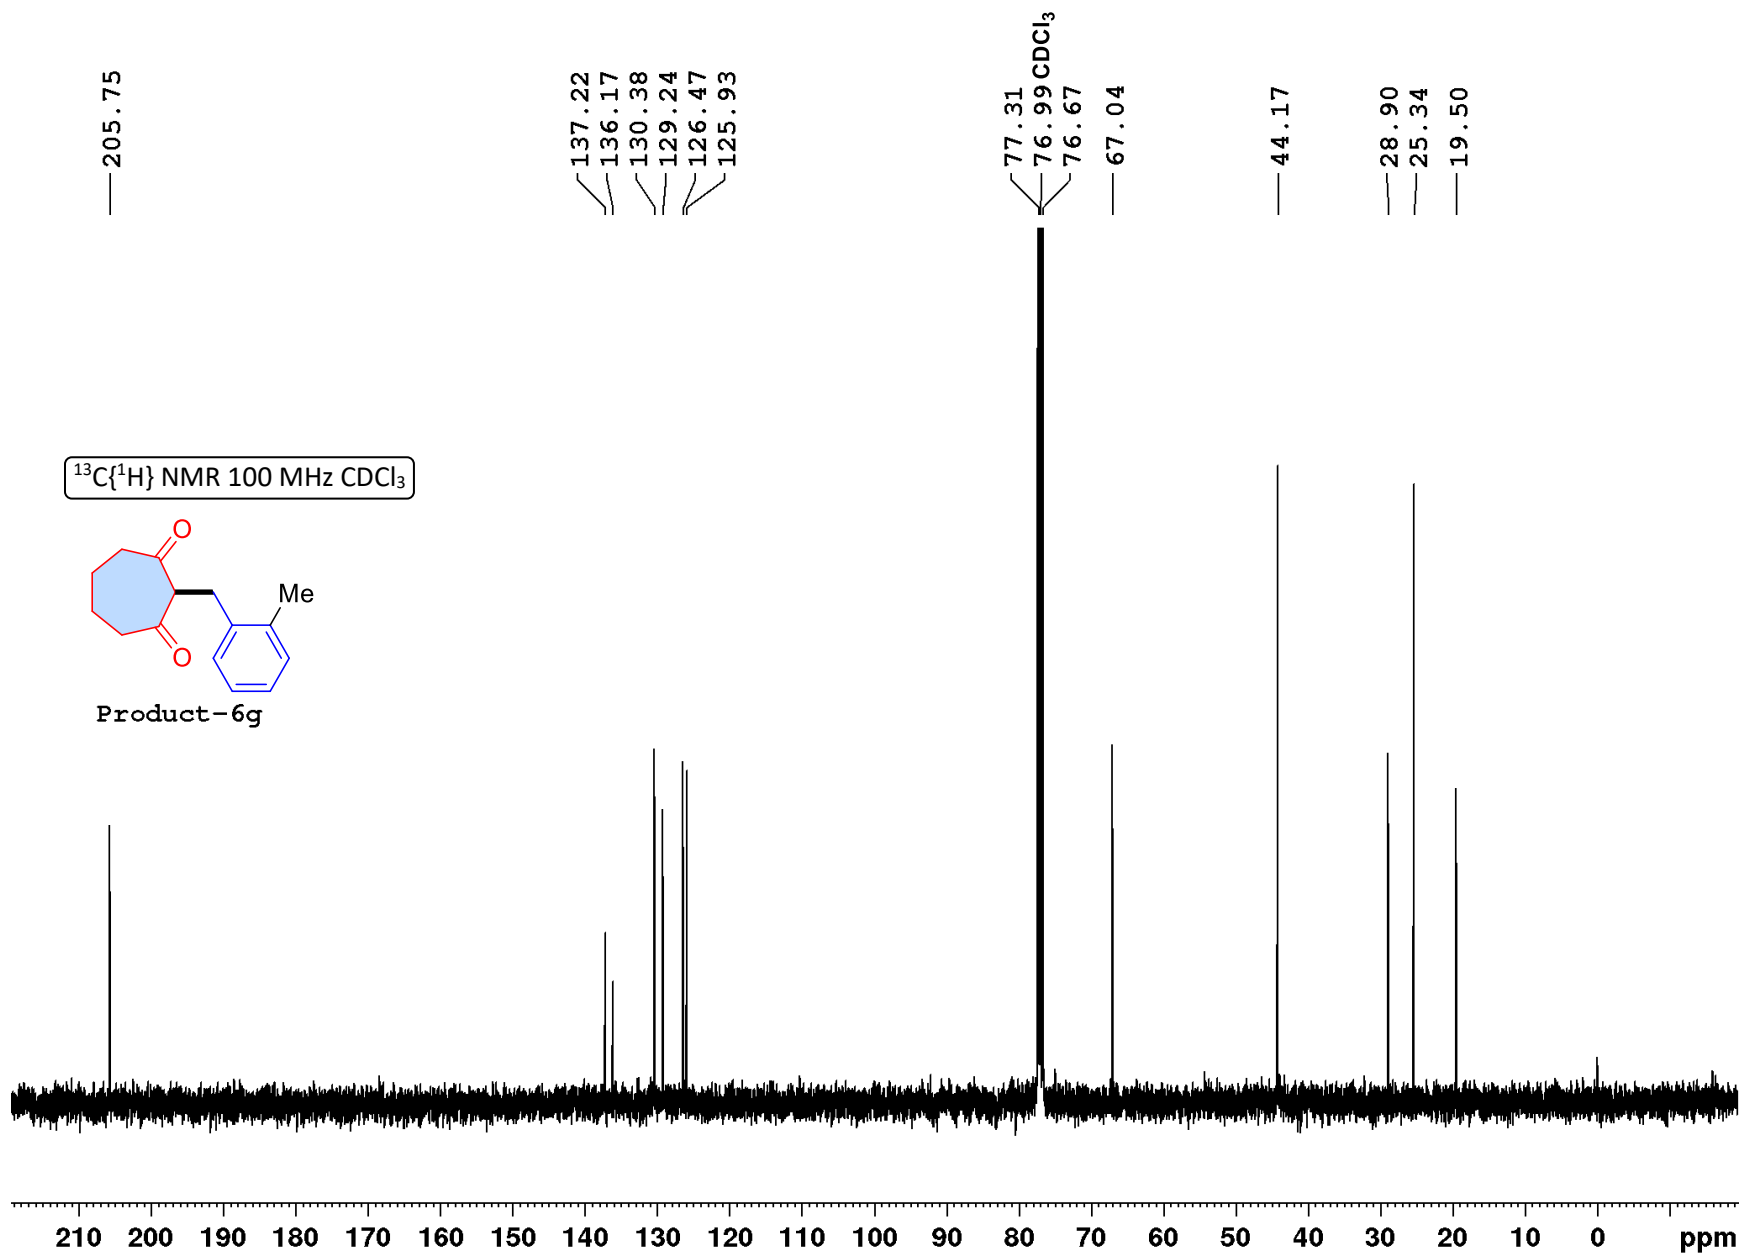

DEPT-135 100 MHz CDCl<sub>3</sub>

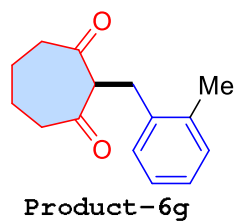

130.42  
129.28  
126.52  
125.97

67.08

44.22

28.94

25.38

19.55

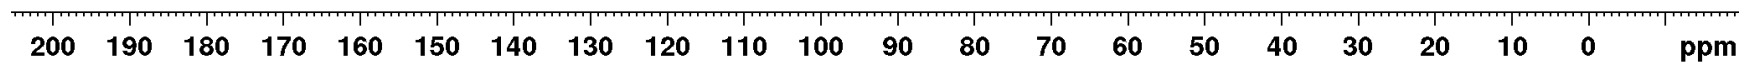

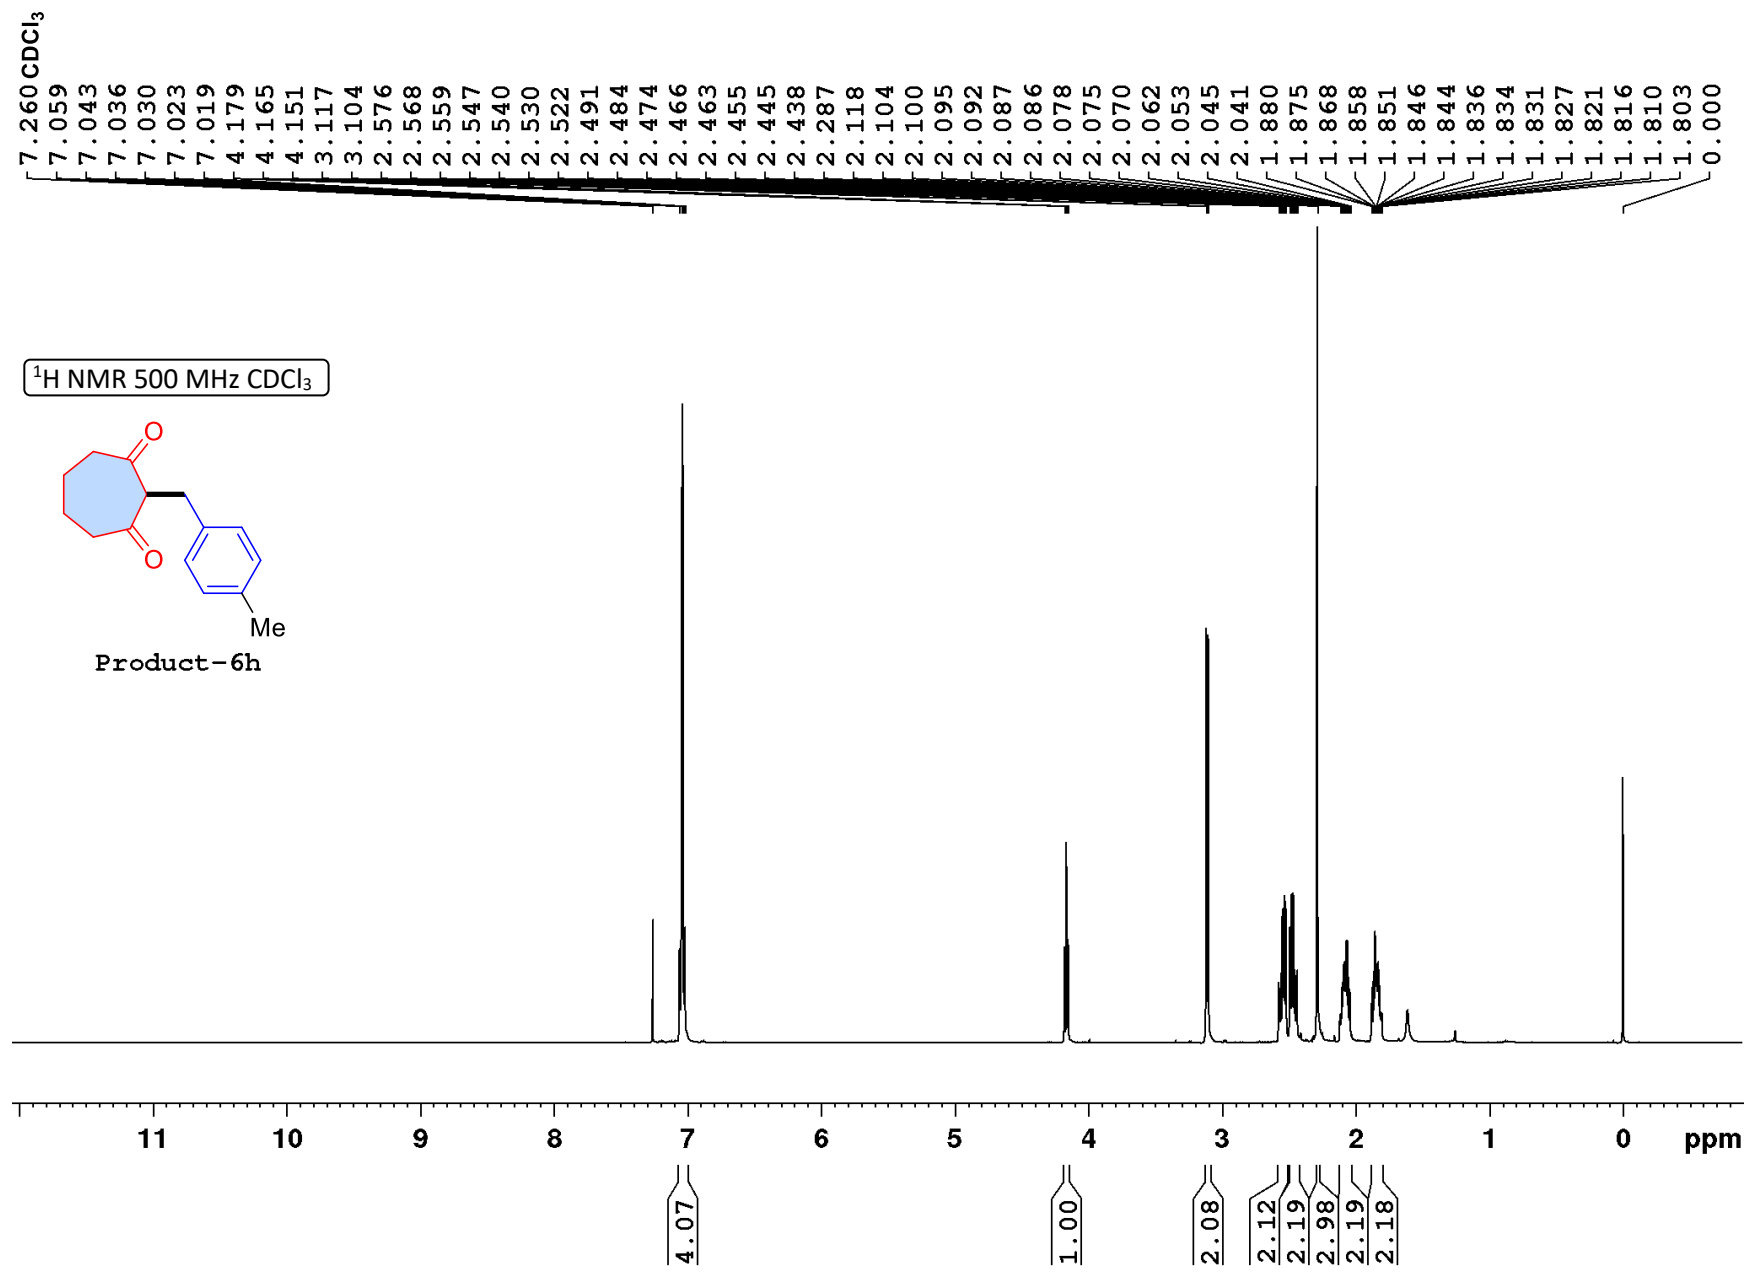



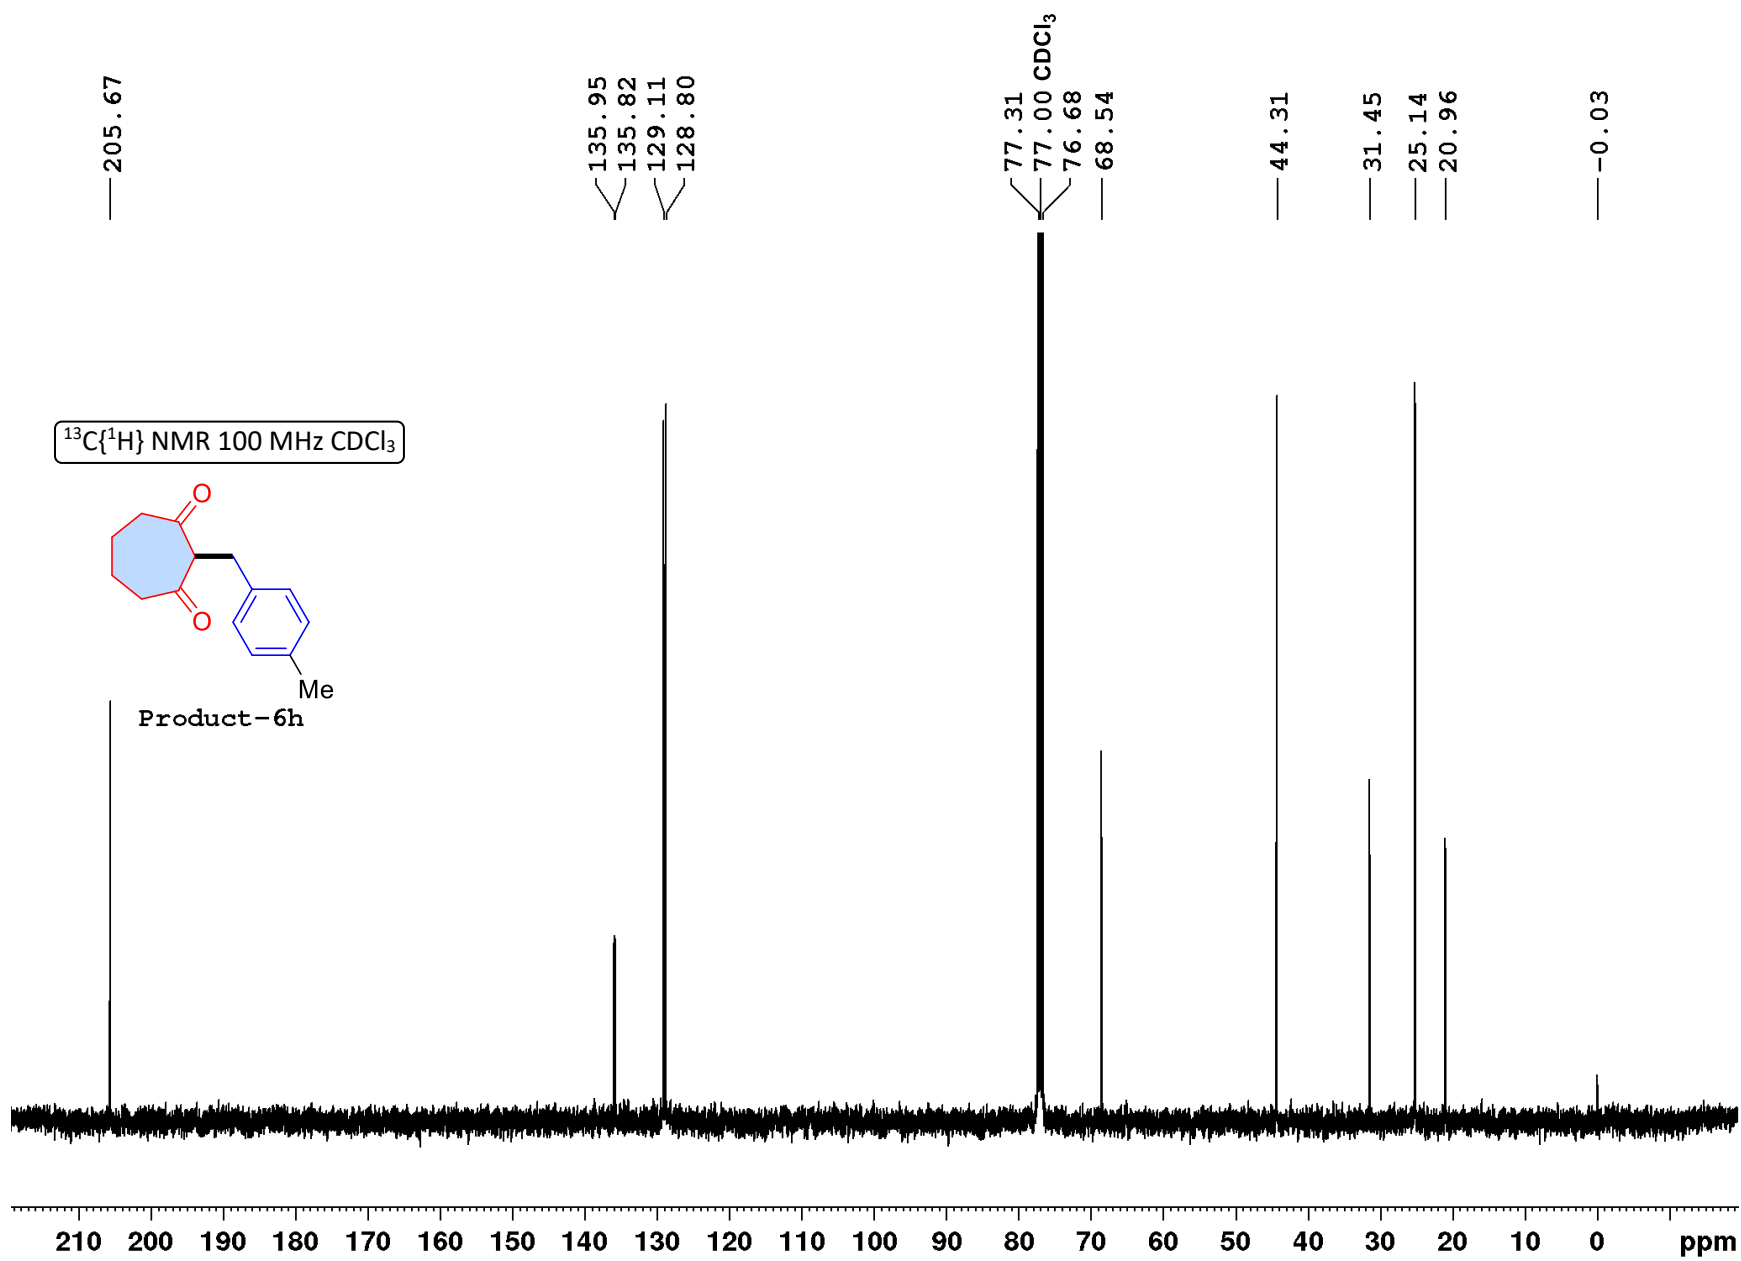

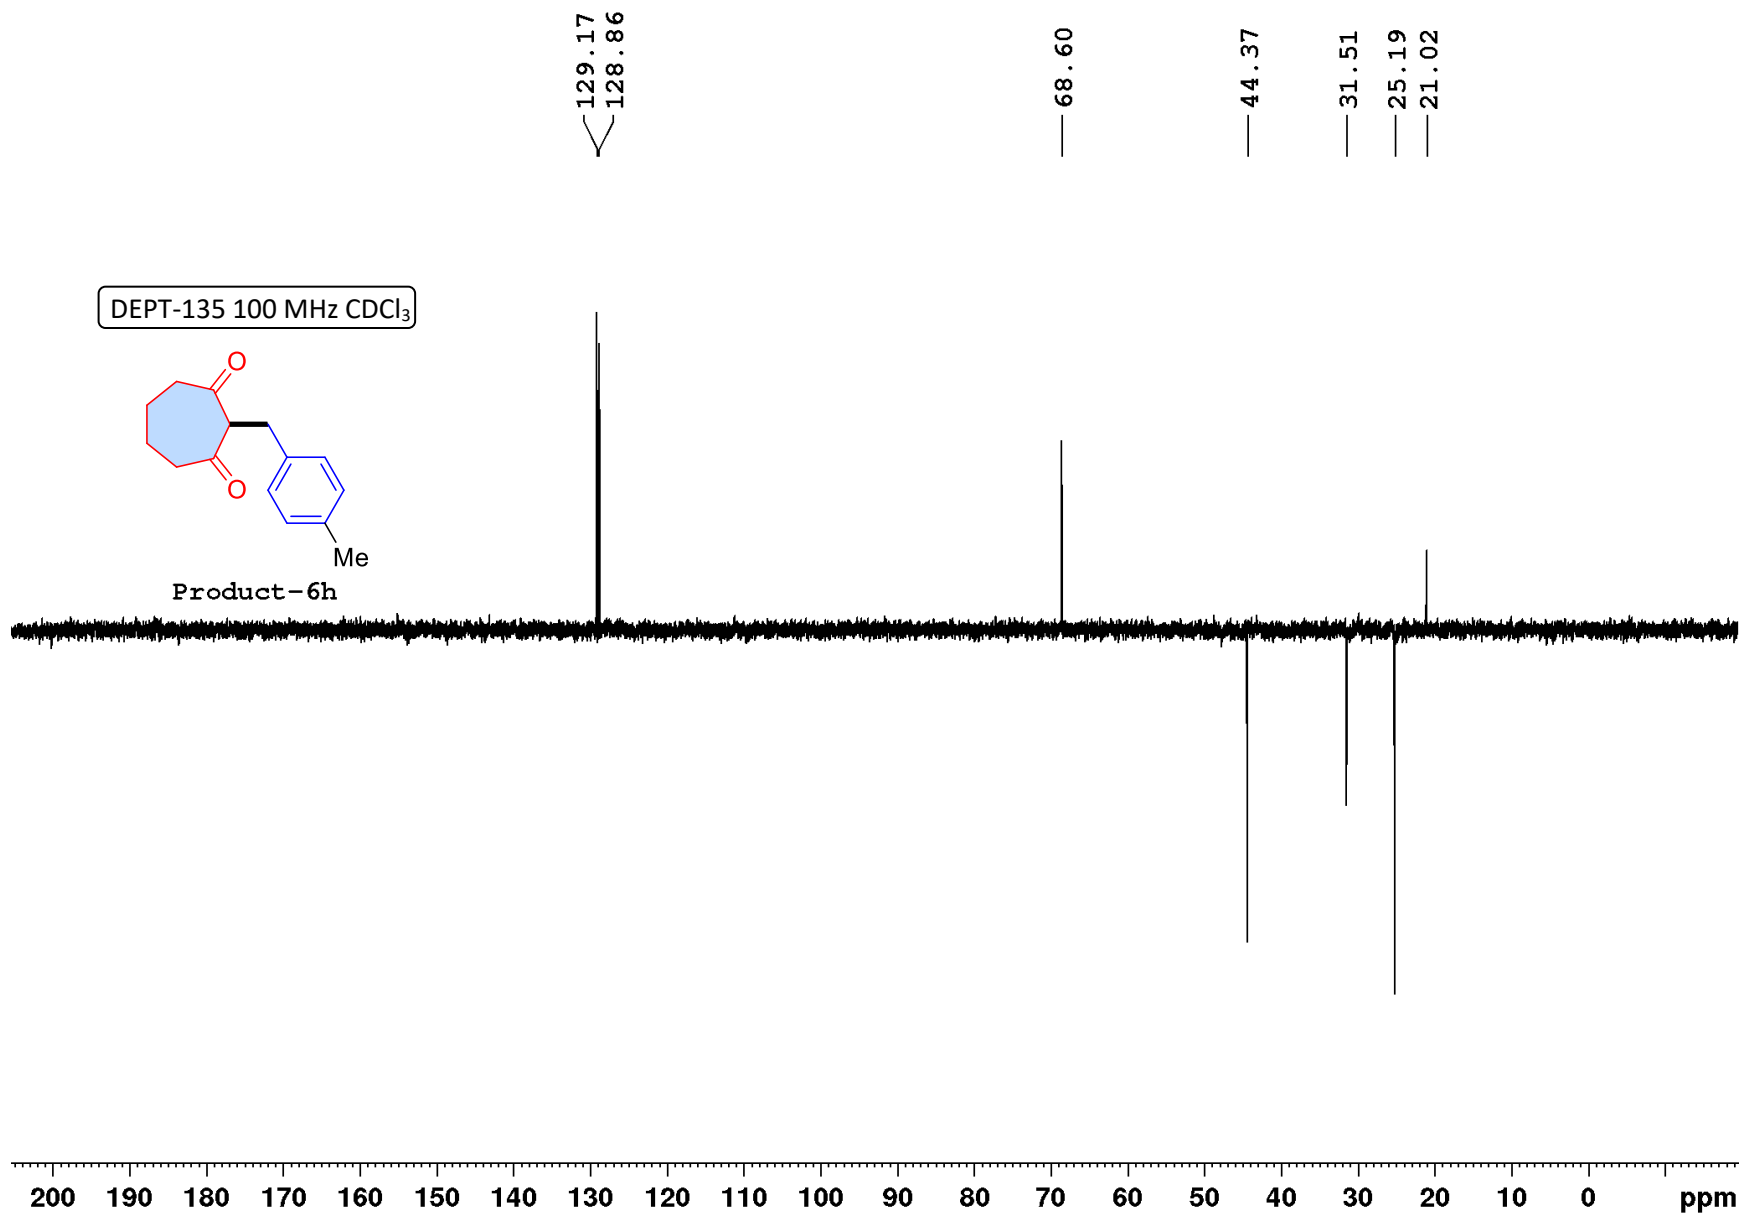

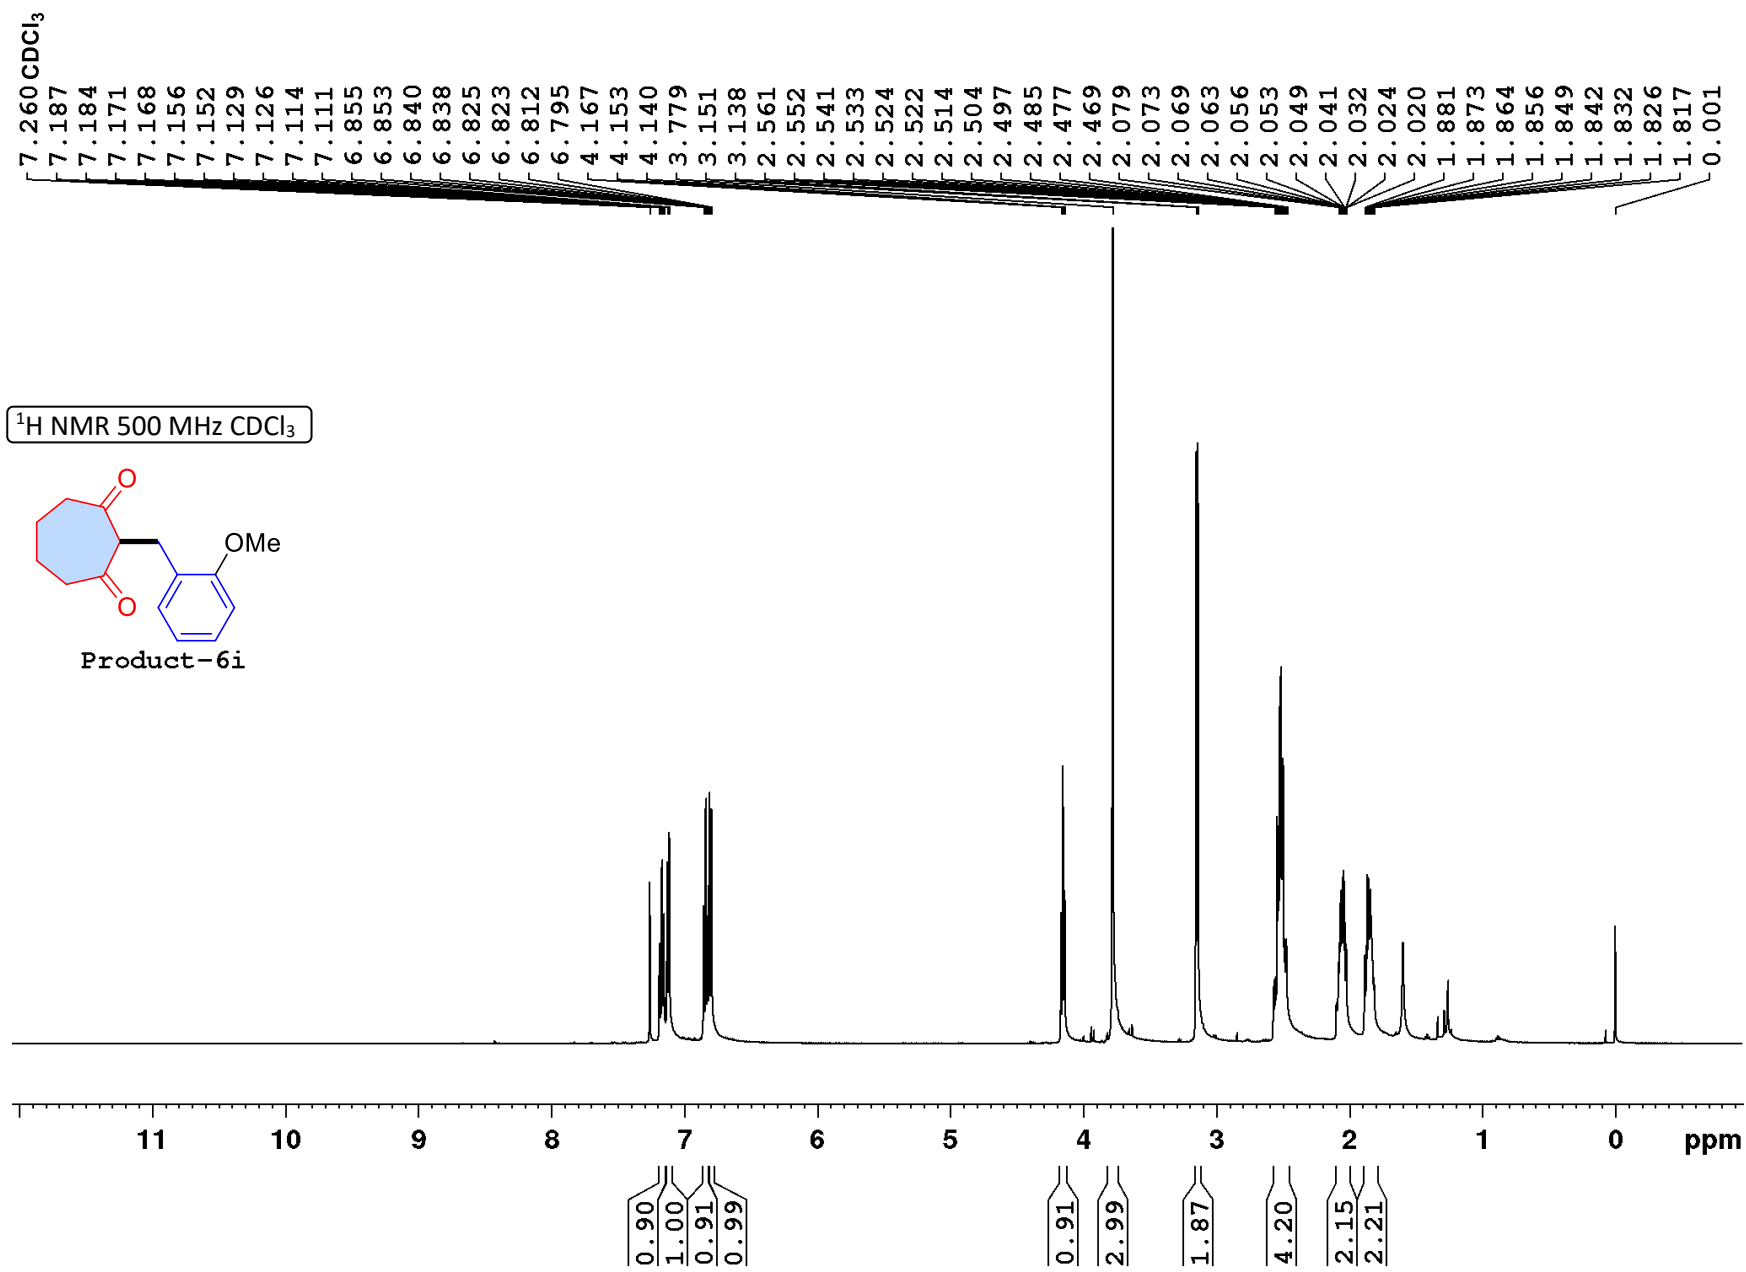

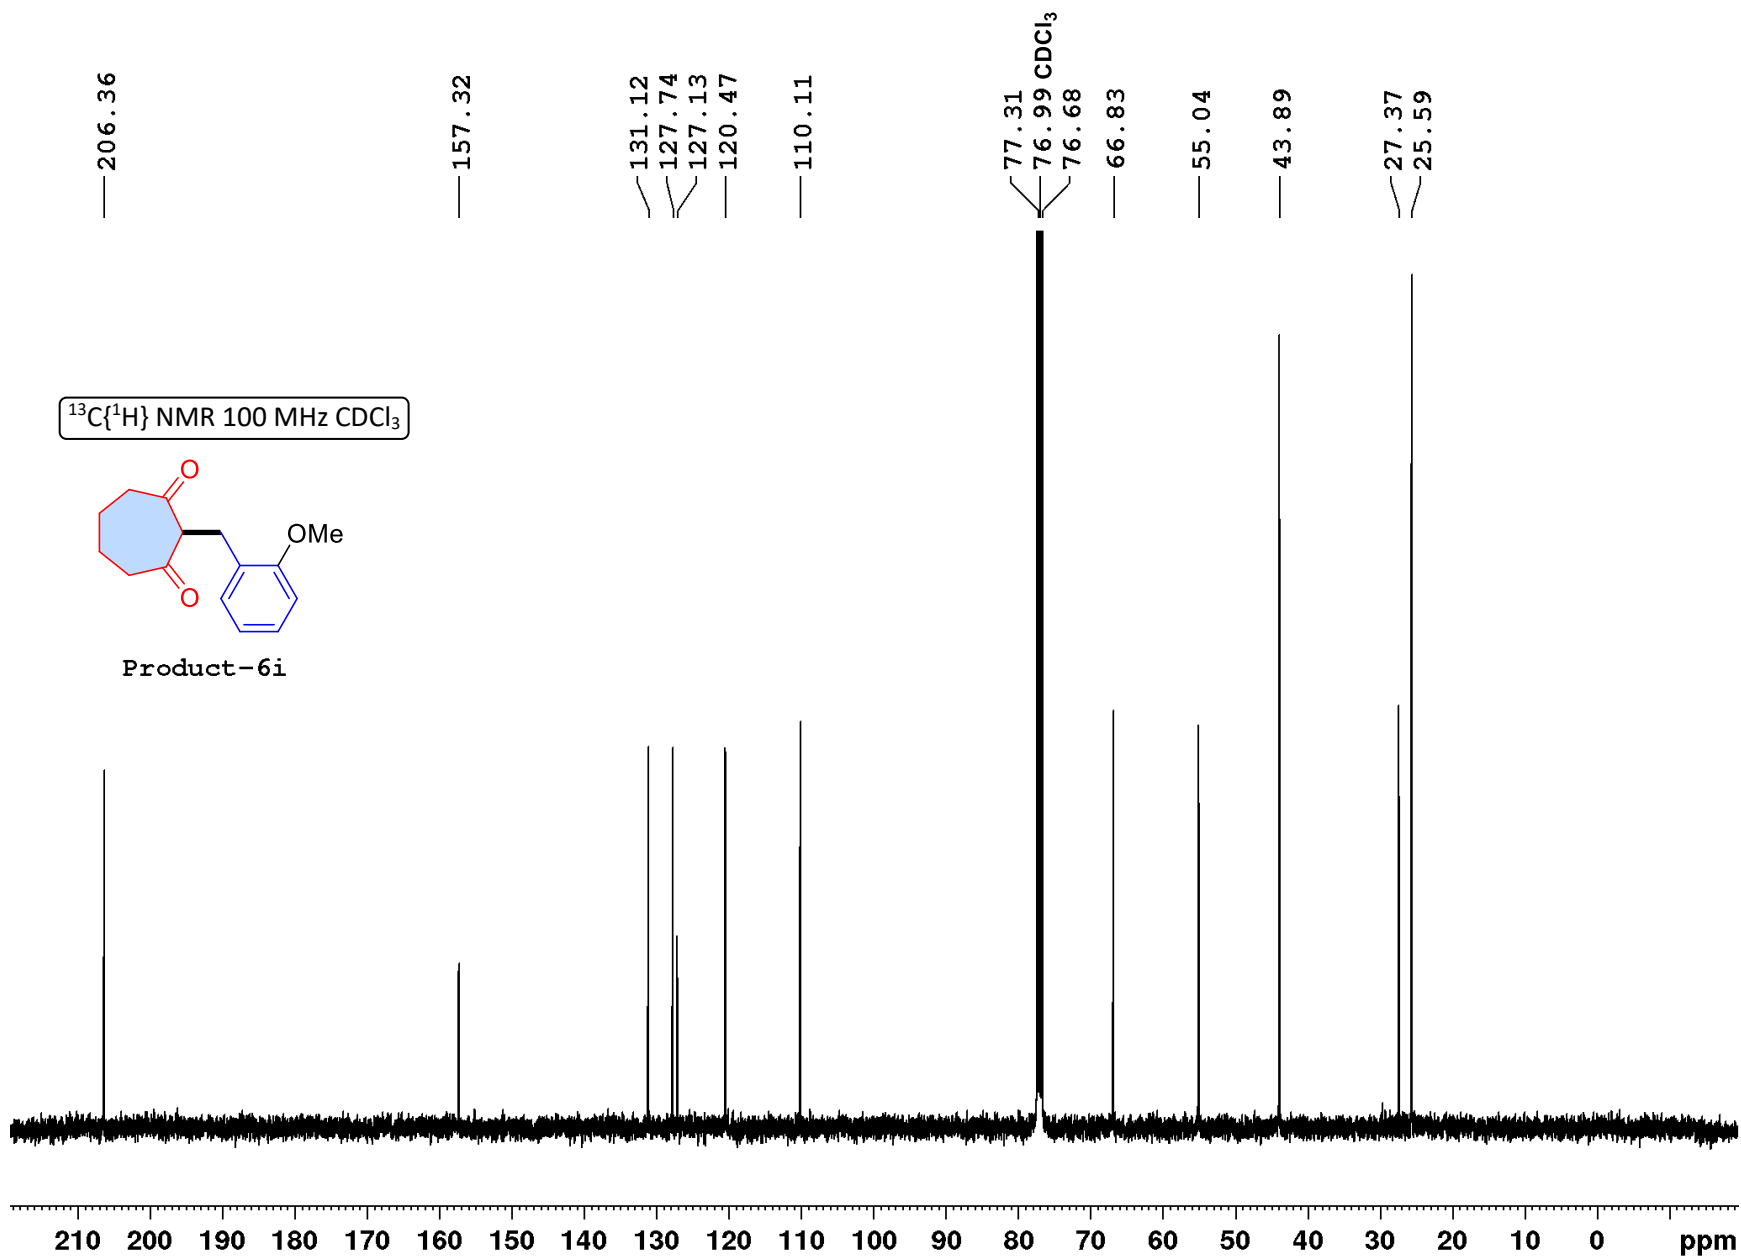

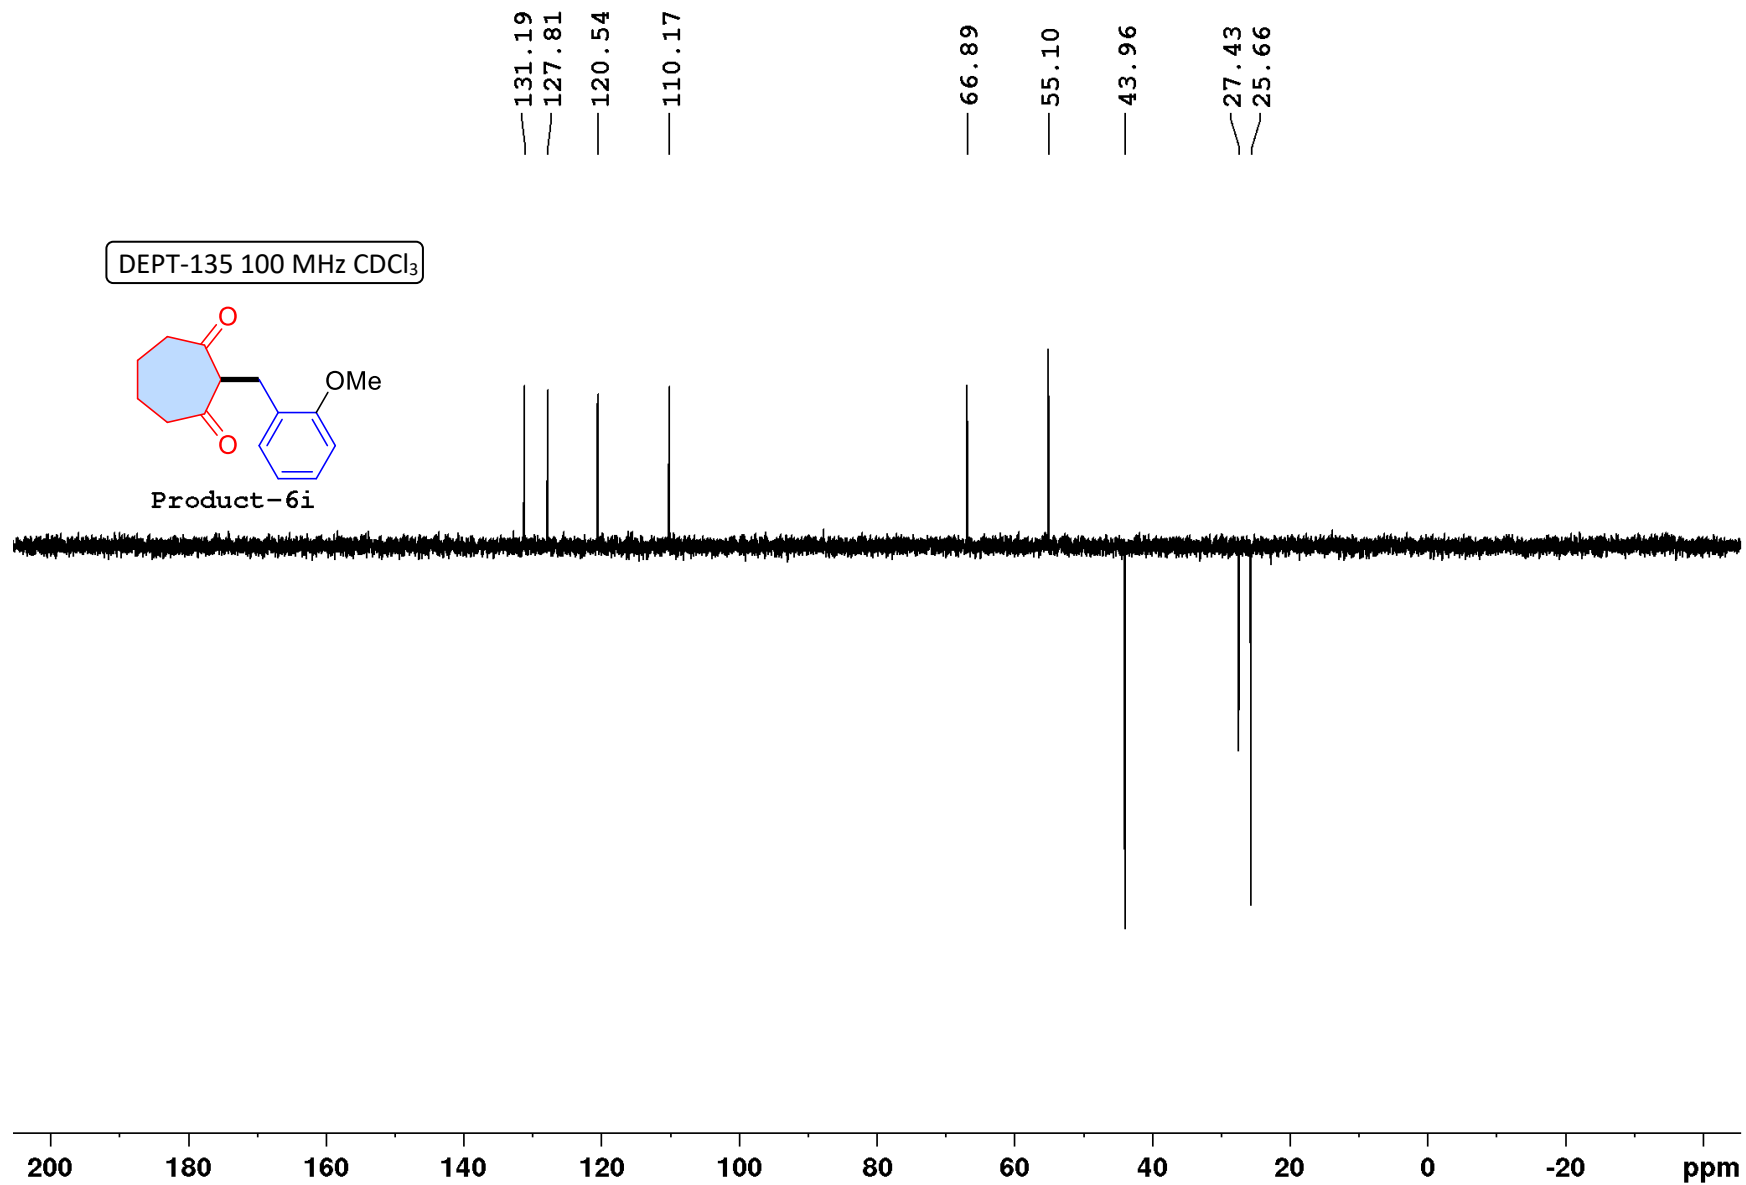

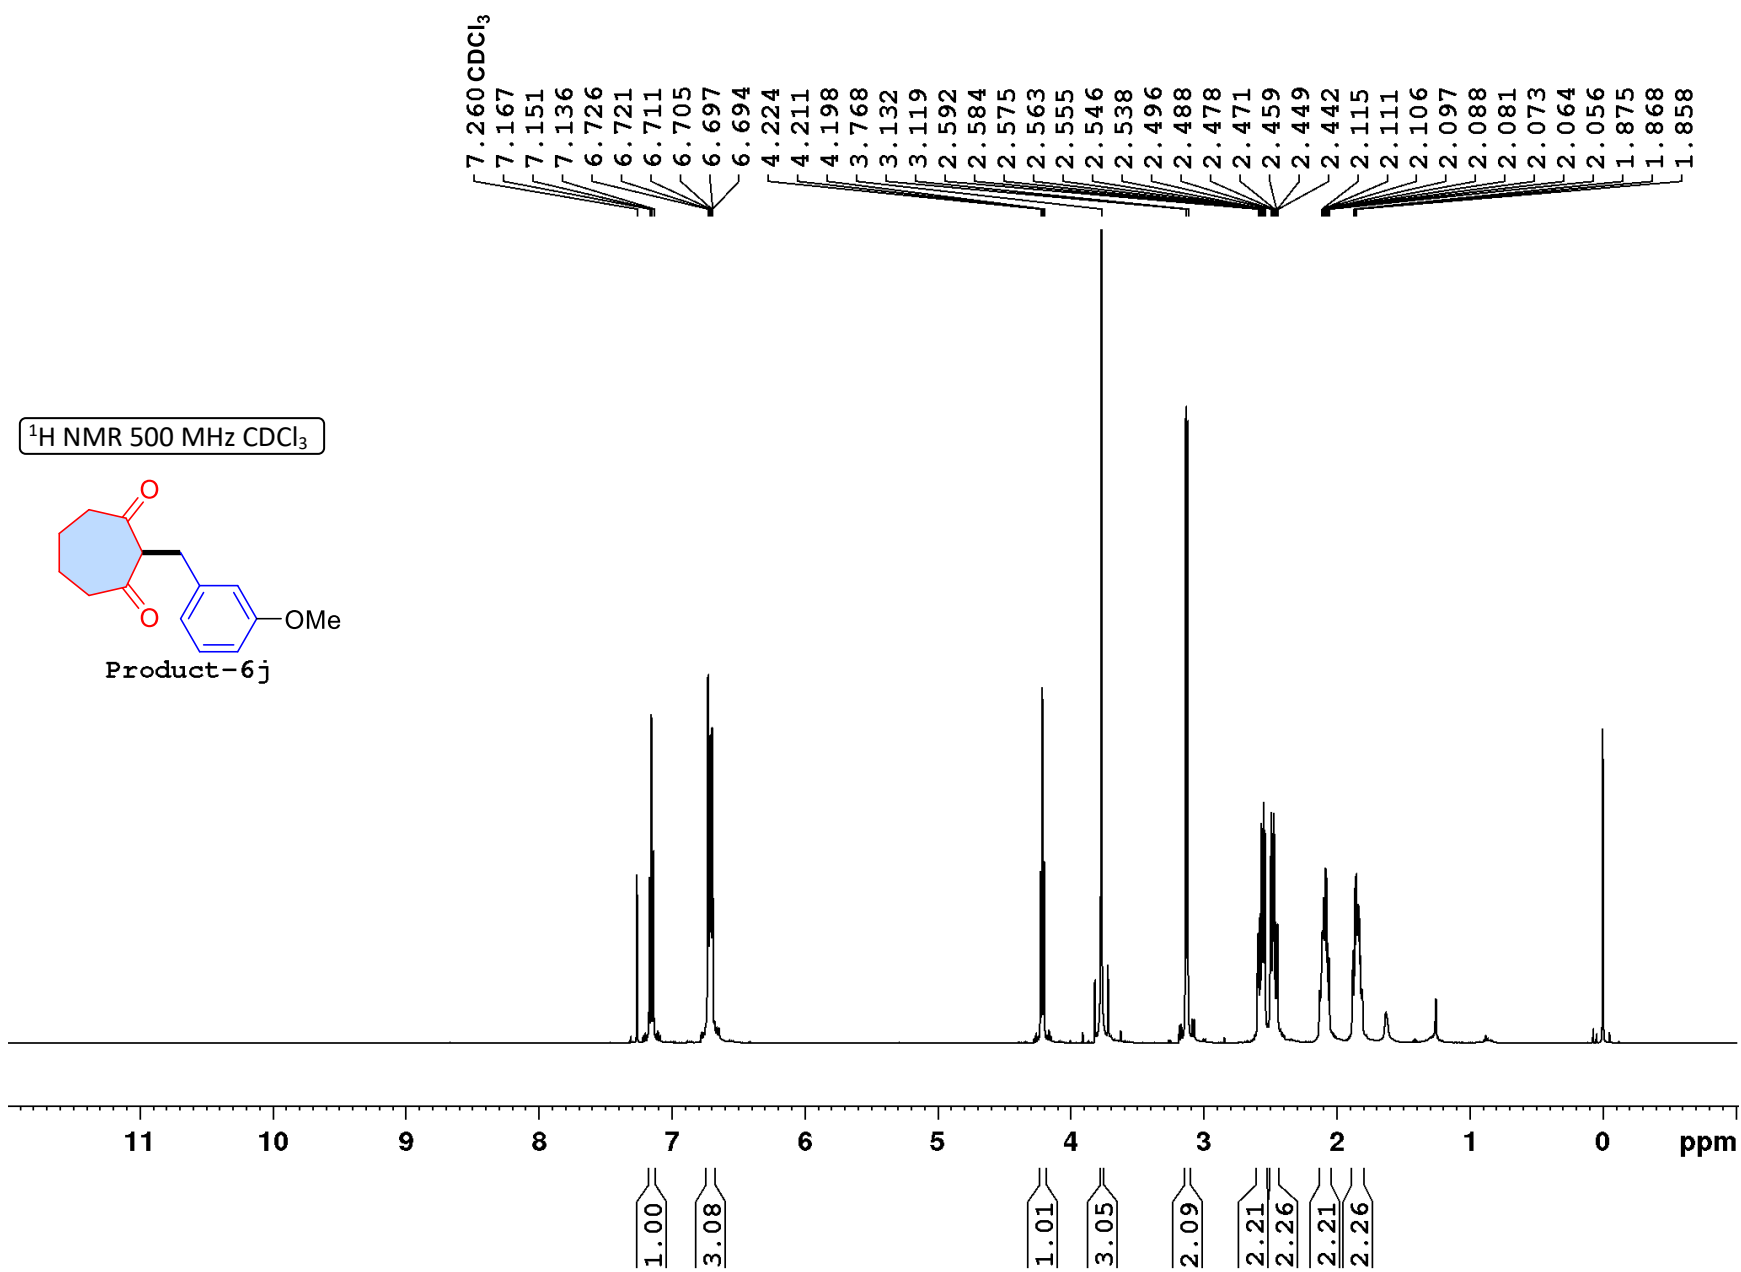

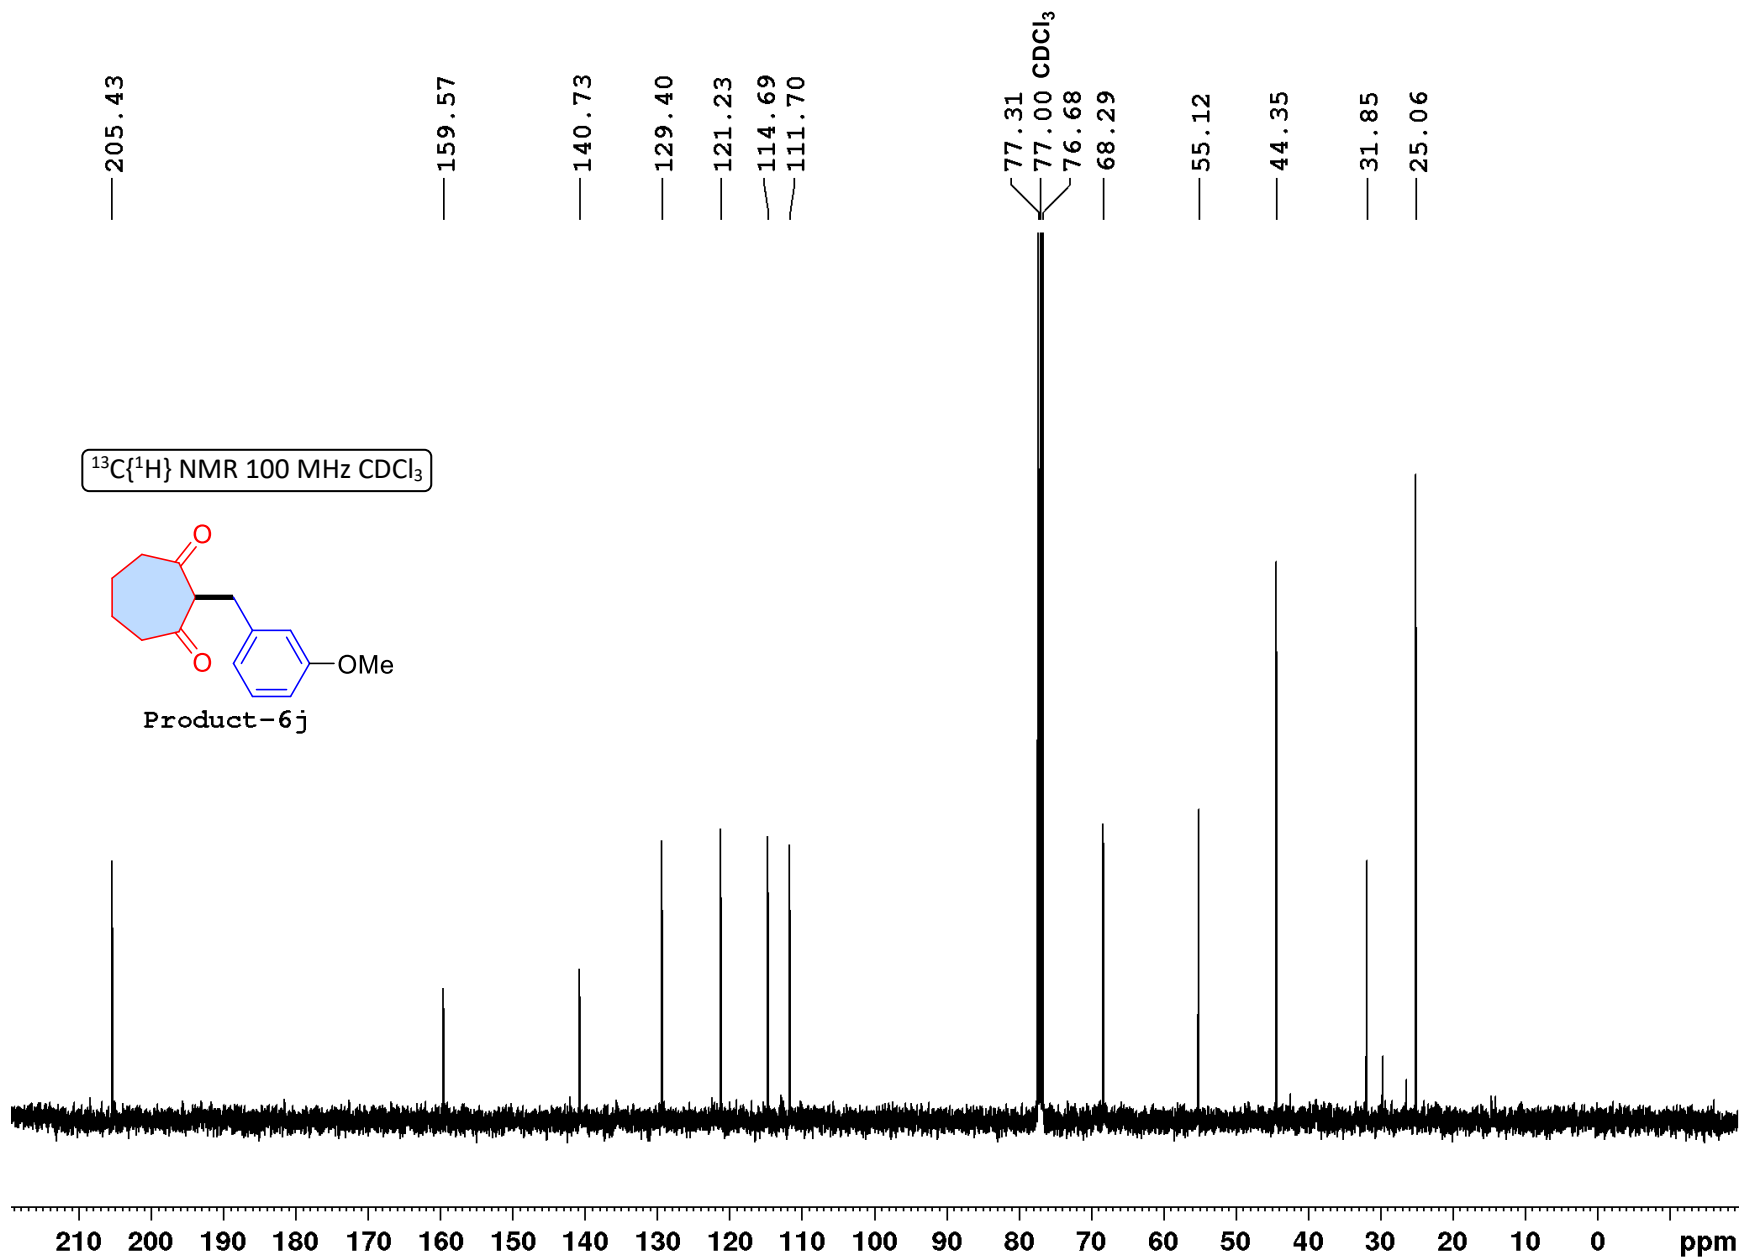

DEPT-135 100 MHz CDCl<sub>3</sub>

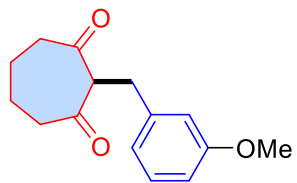

Product-6j

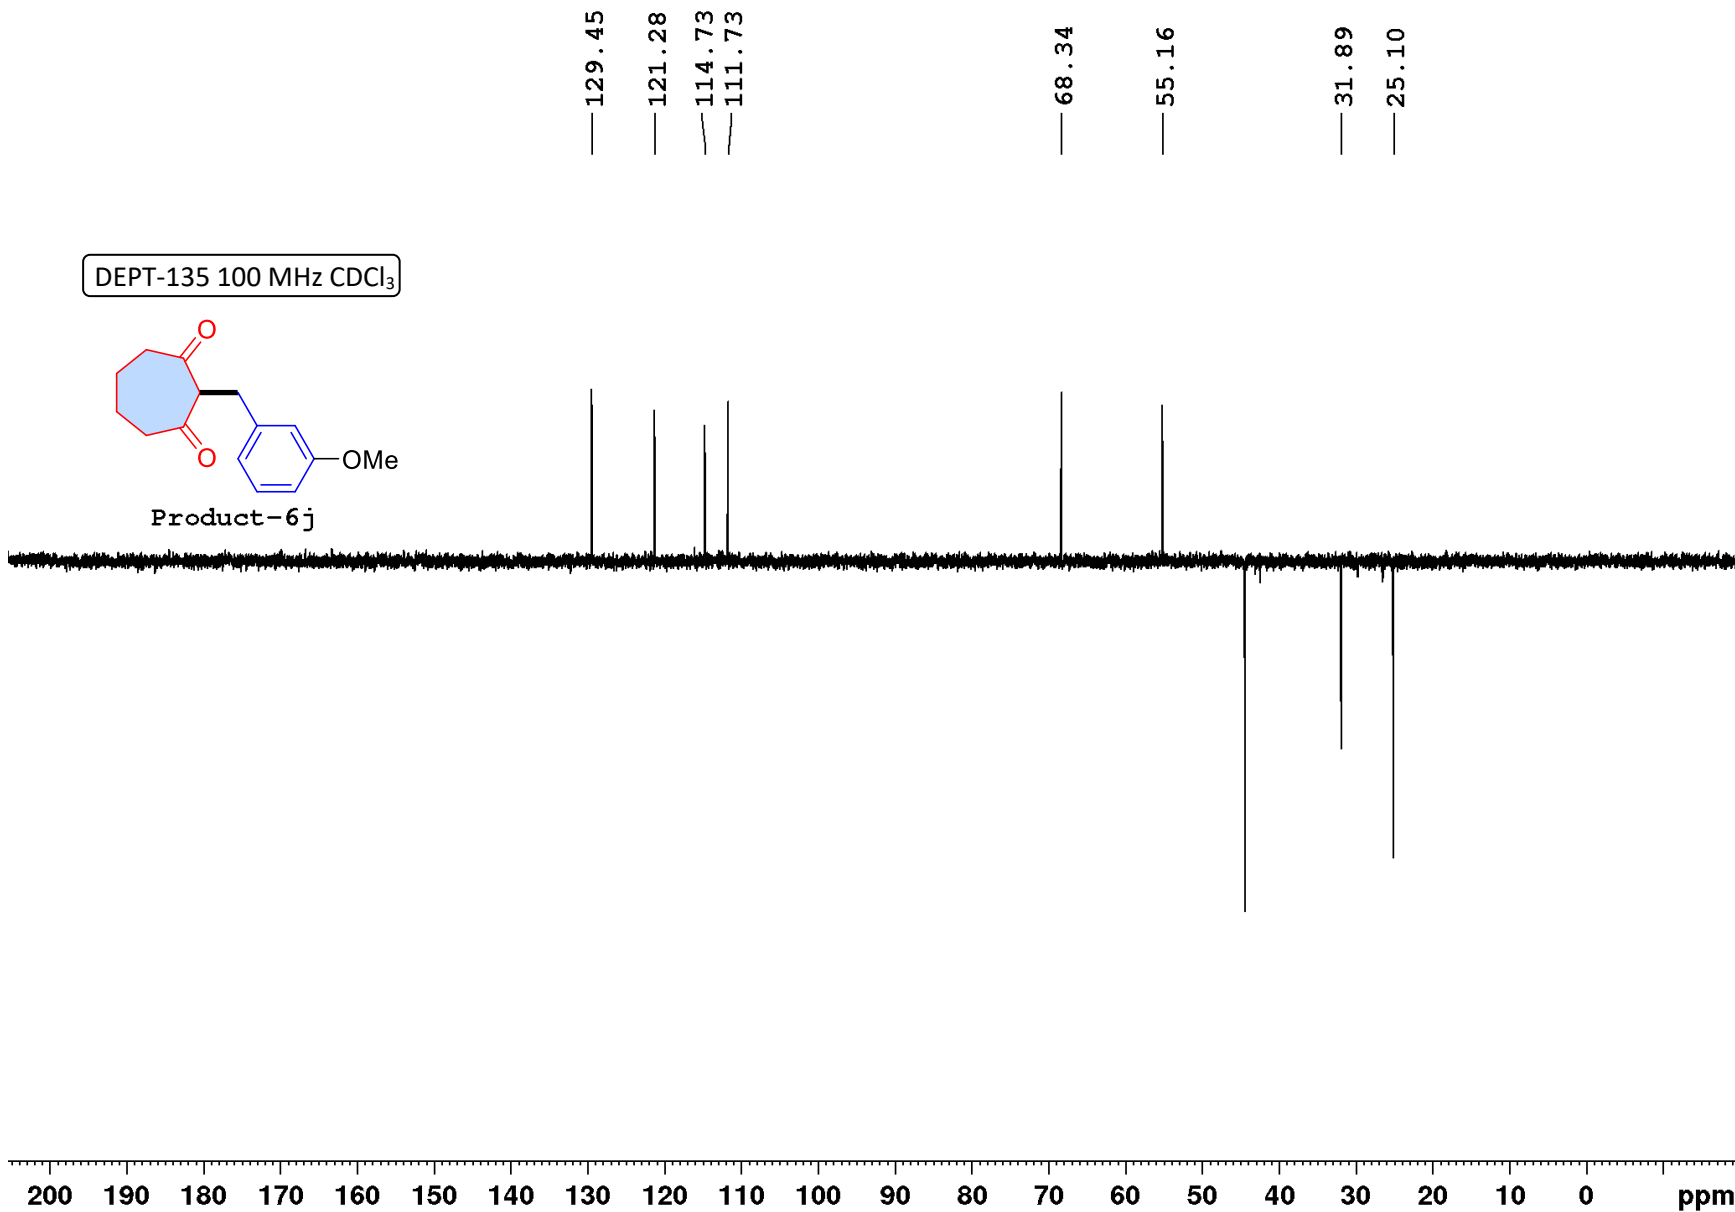



$^1\text{H}$  NMR 500 MHz  $\text{CDCl}_3$

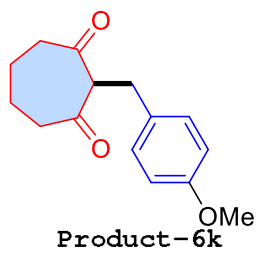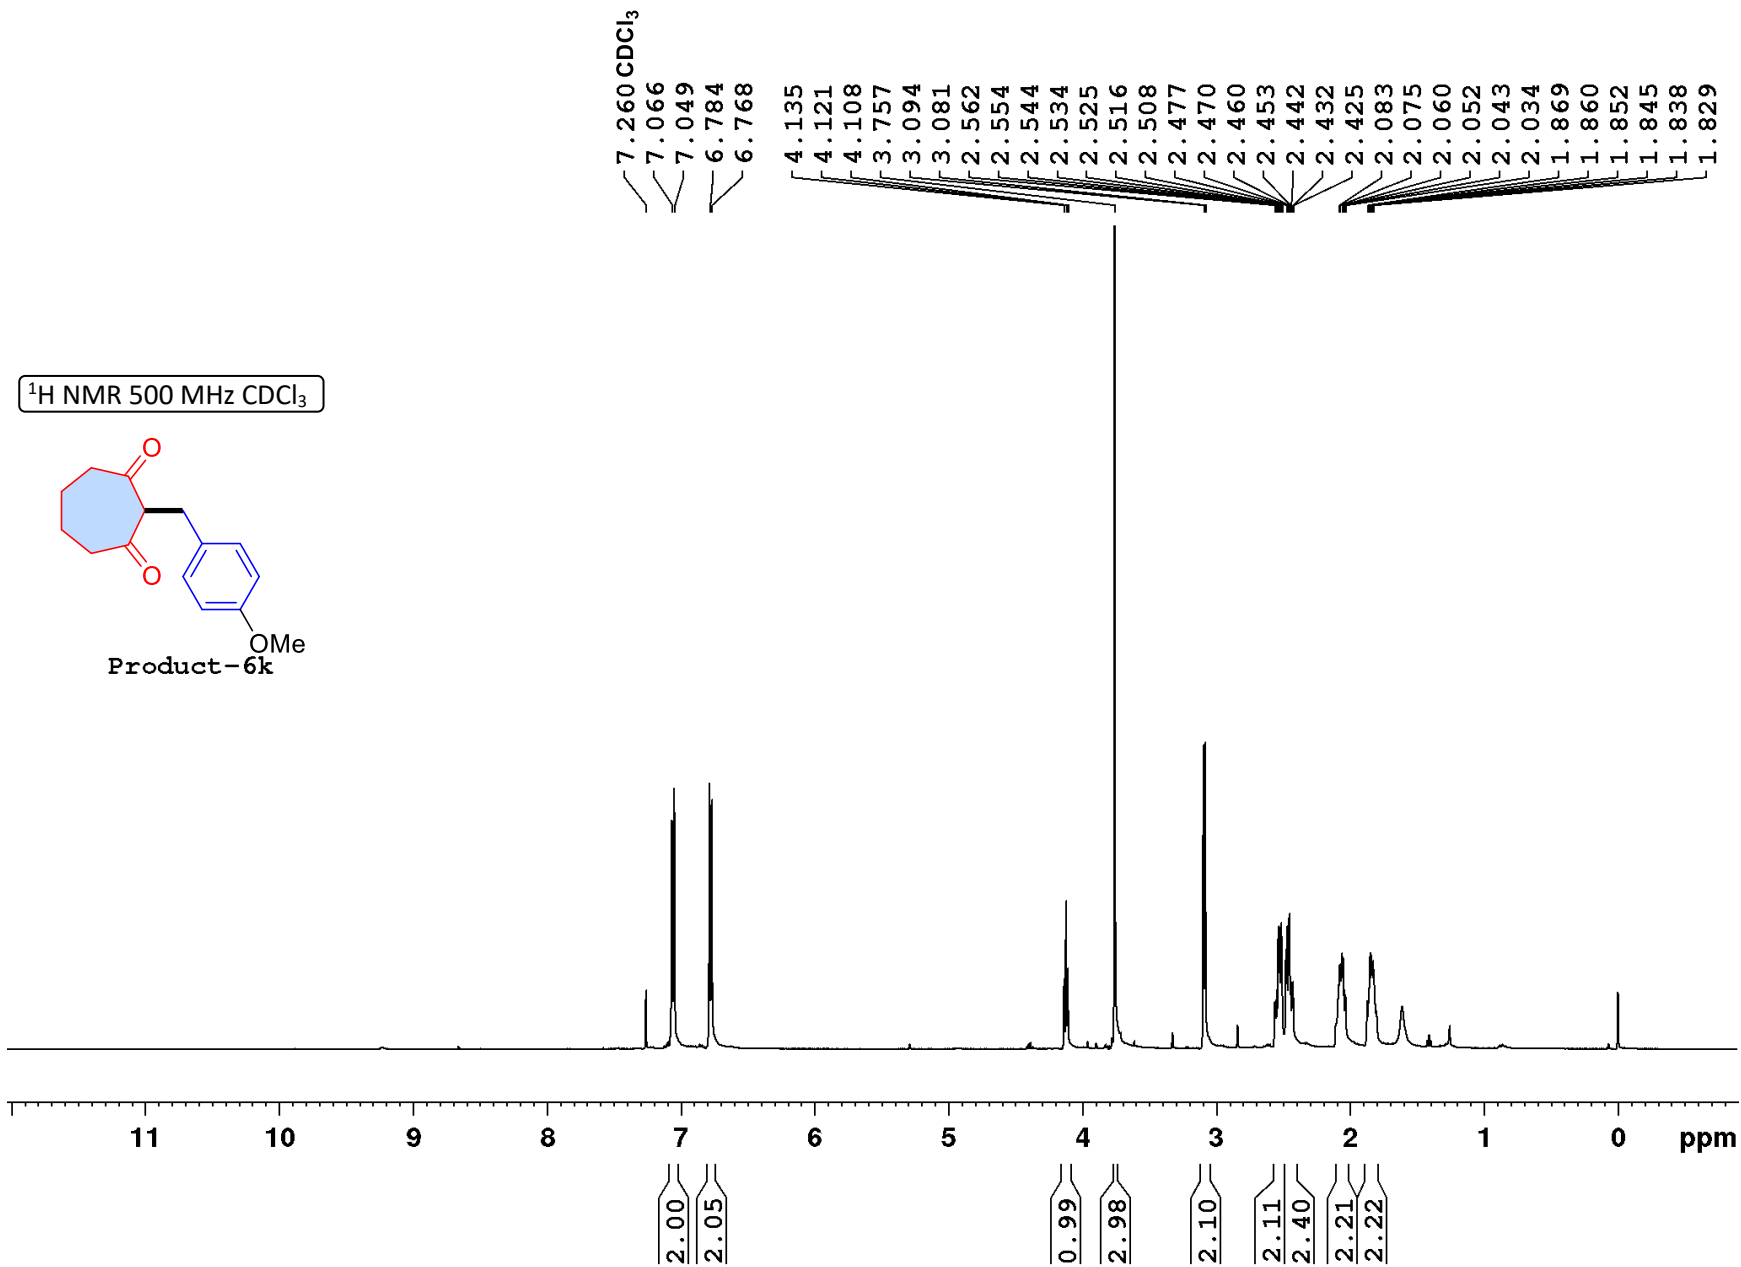

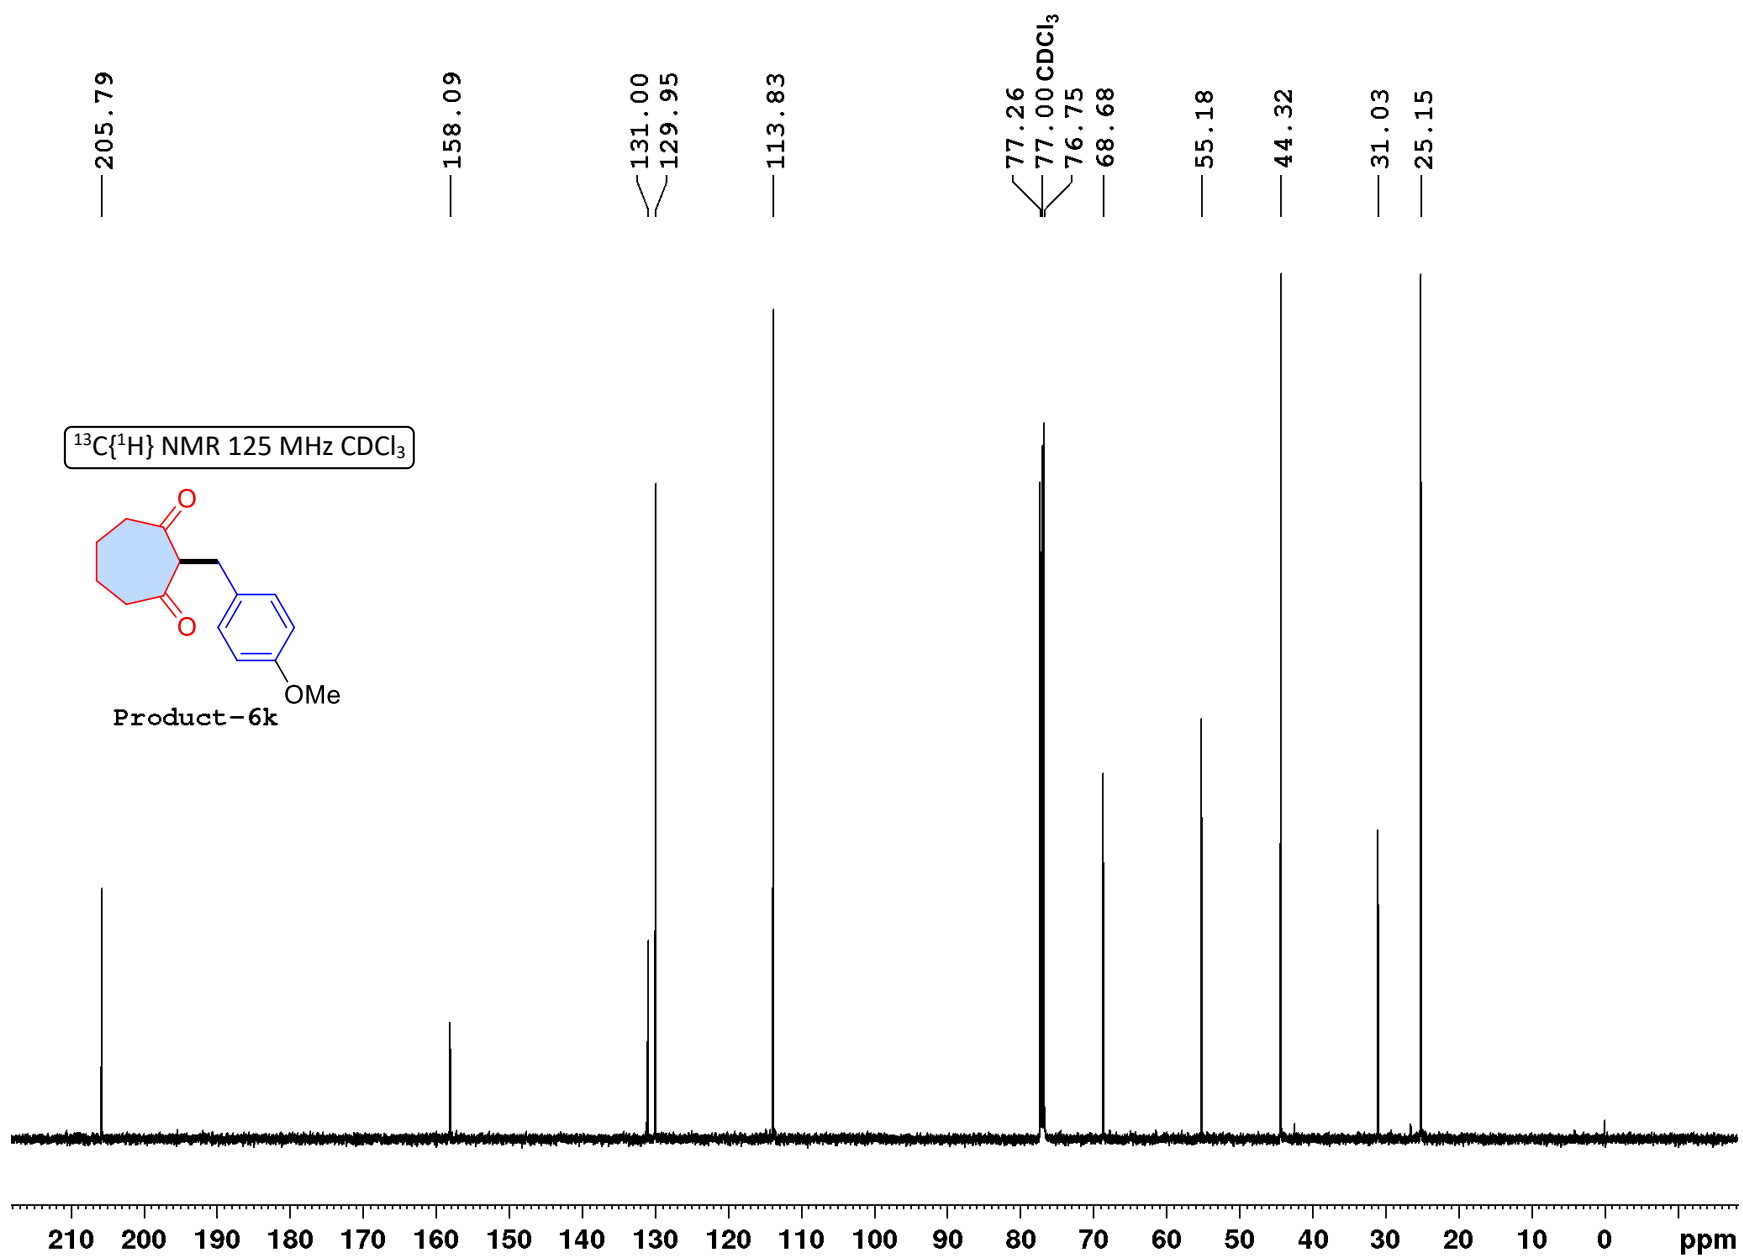

DEPT-135 125 MHz CDCl<sub>3</sub>

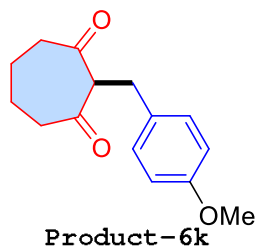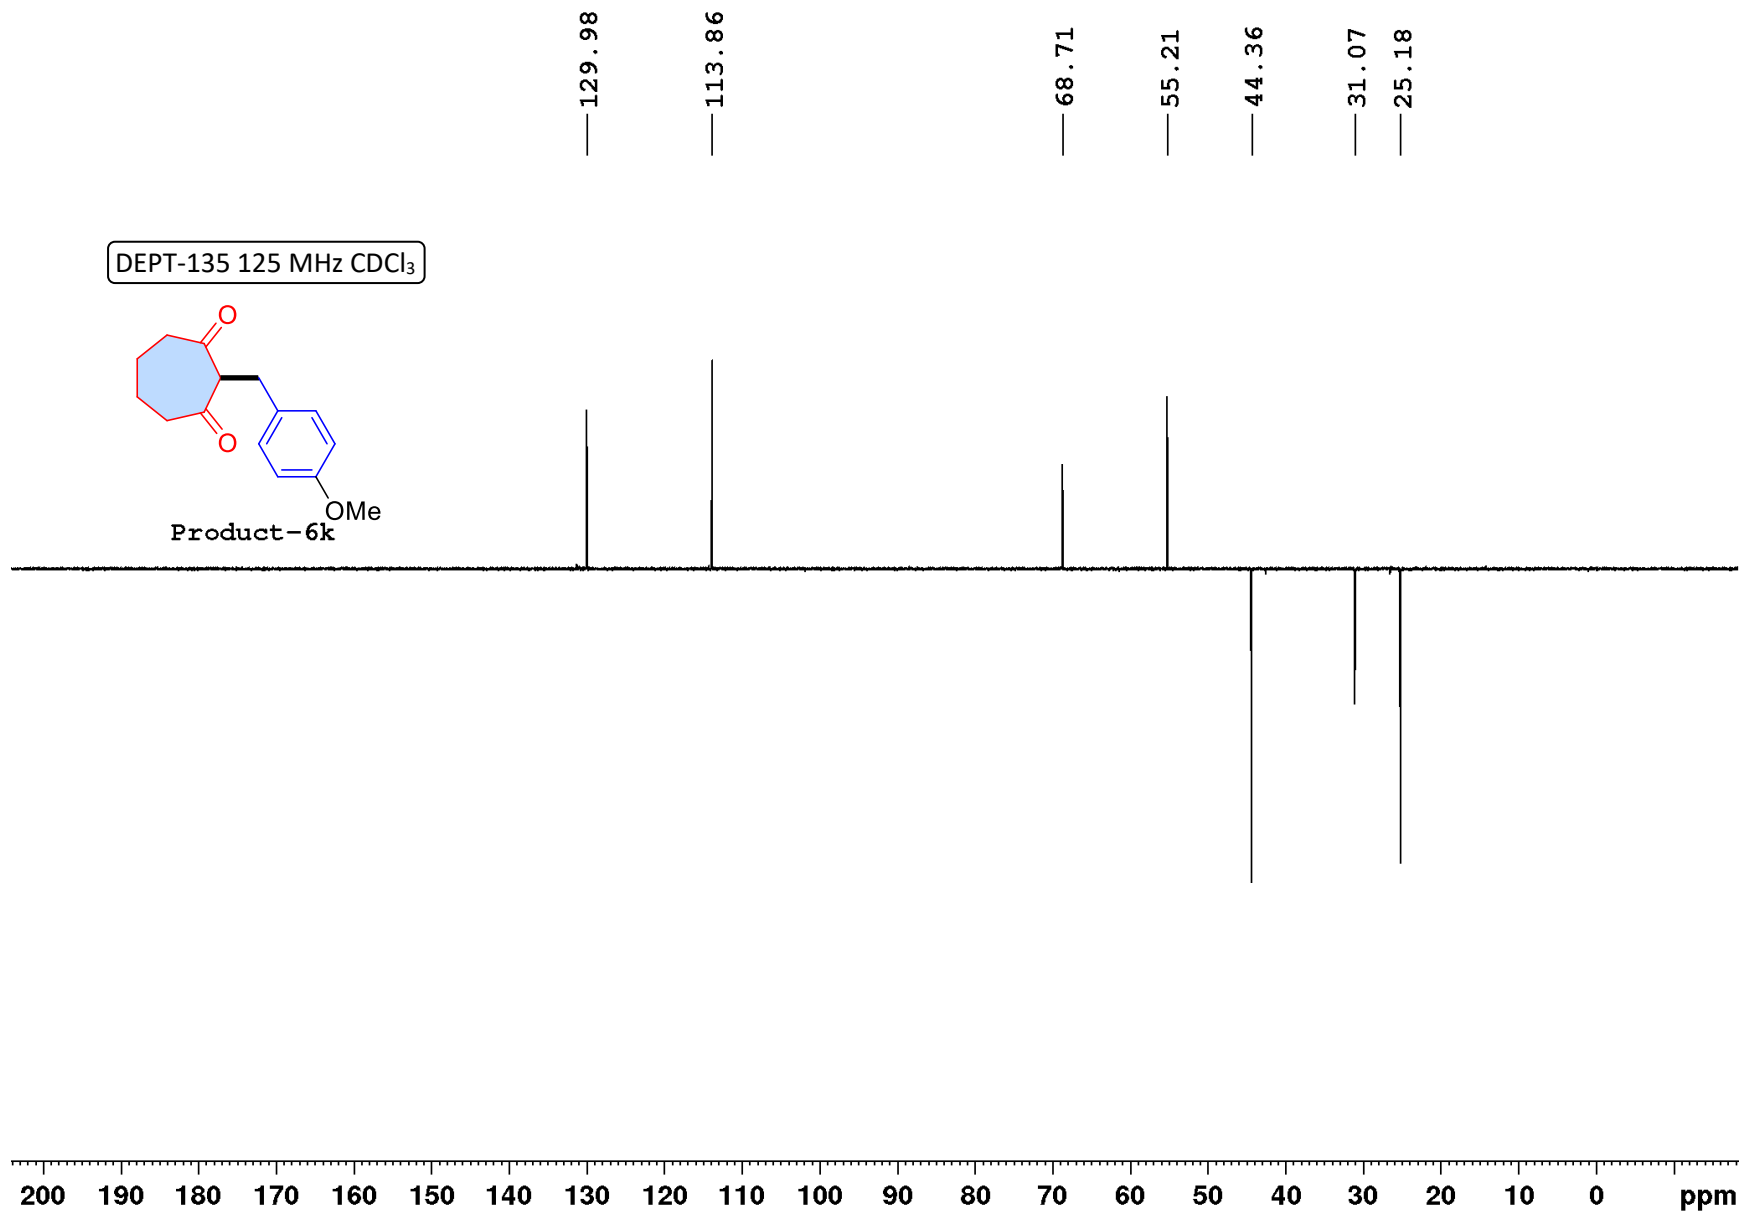

<sup>1</sup>H NMR 500 MHz CDCl<sub>3</sub>

<sup>1</sup>H NMR 500 MHz CDCl<sub>3</sub>

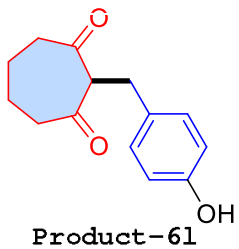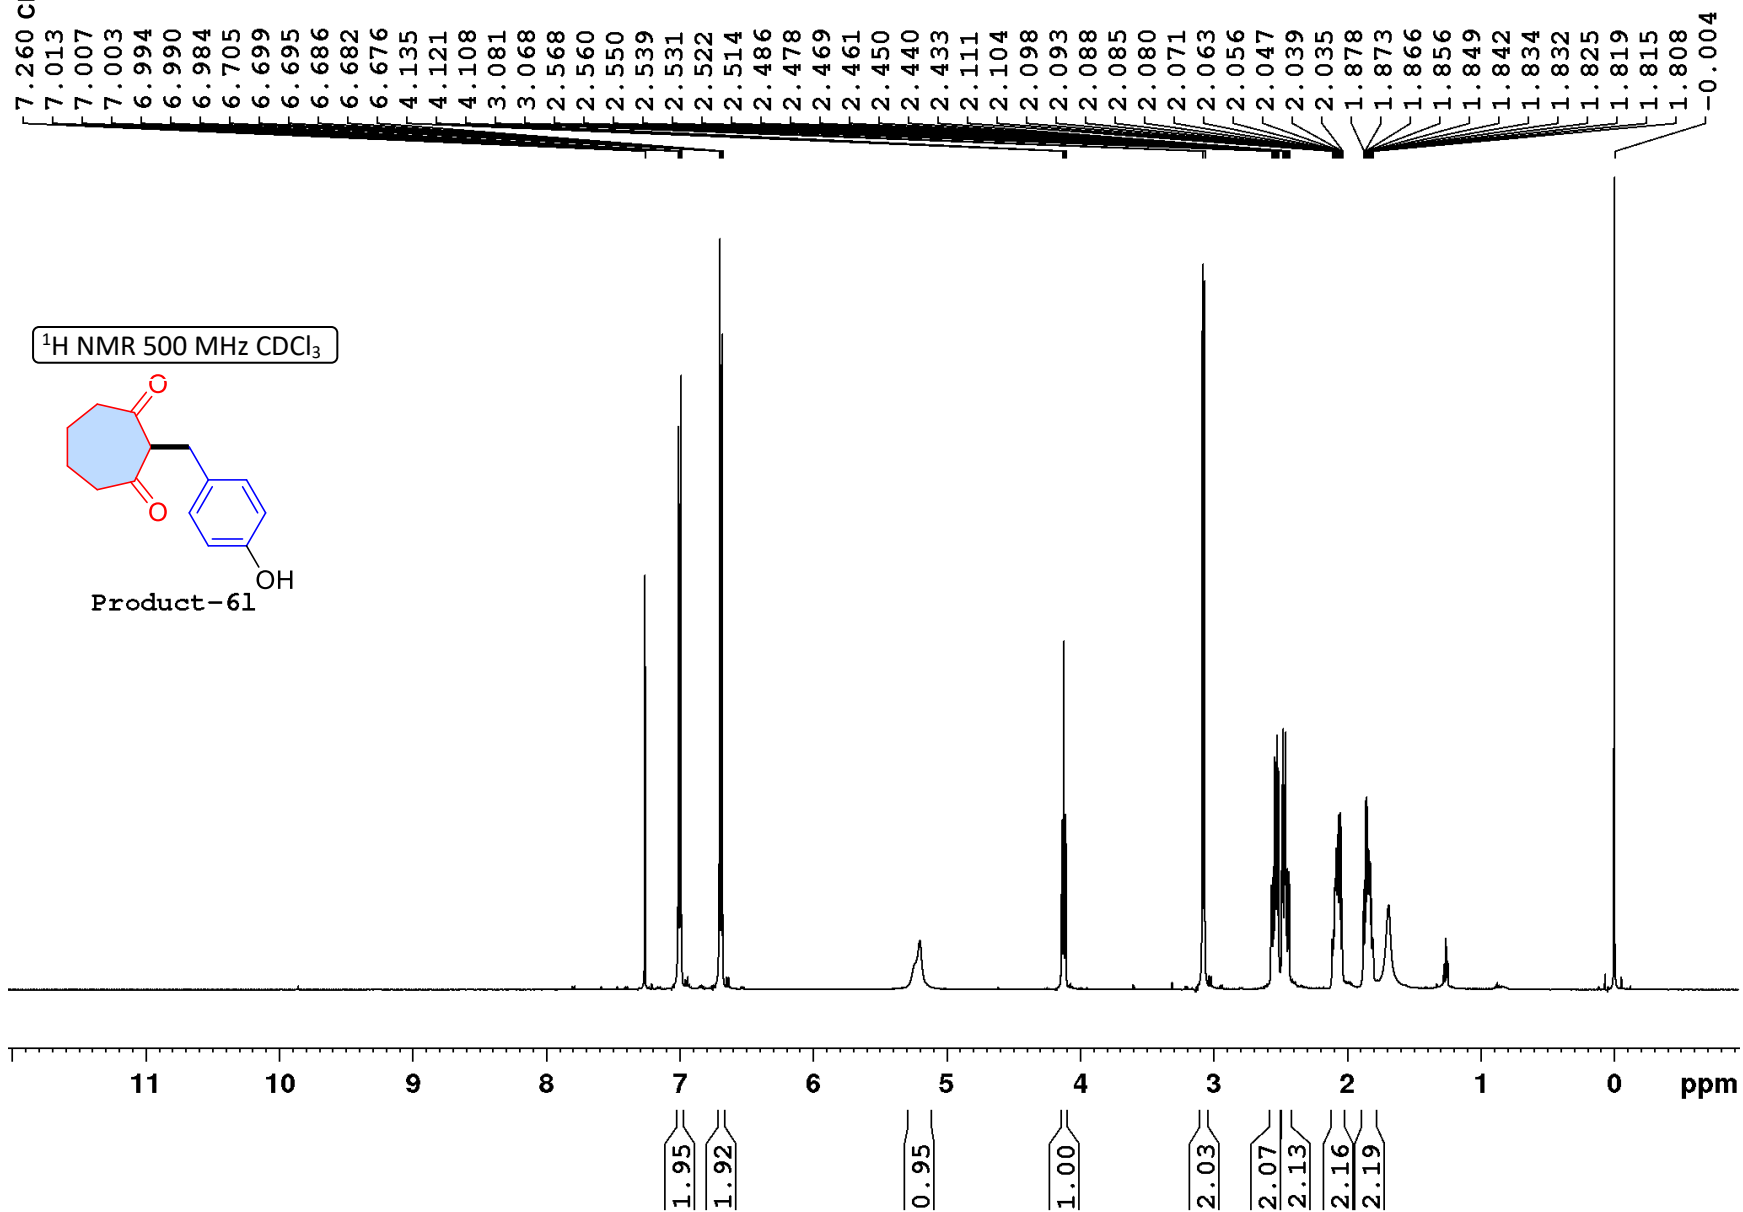

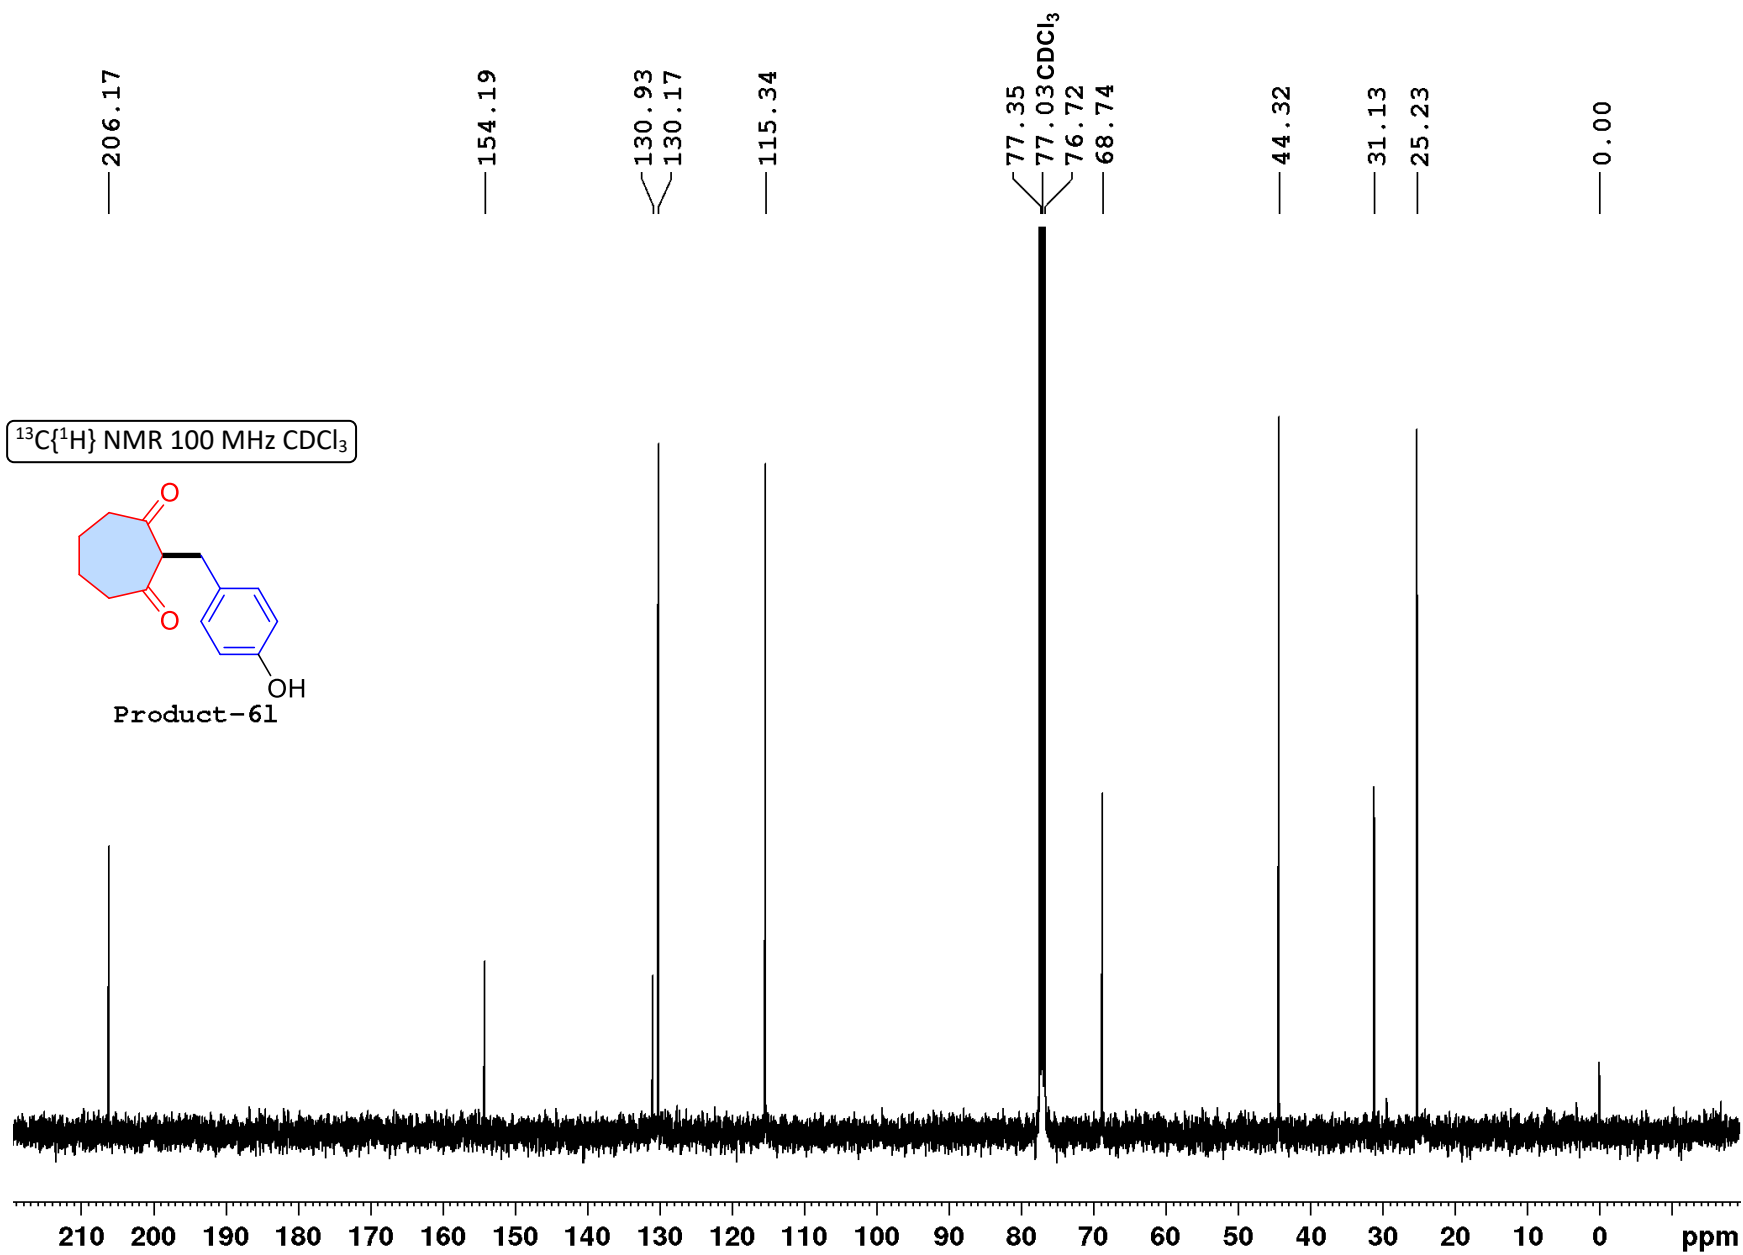

DEPT-135 100 MHz CDCl<sub>3</sub>

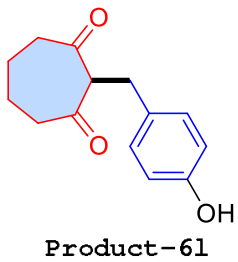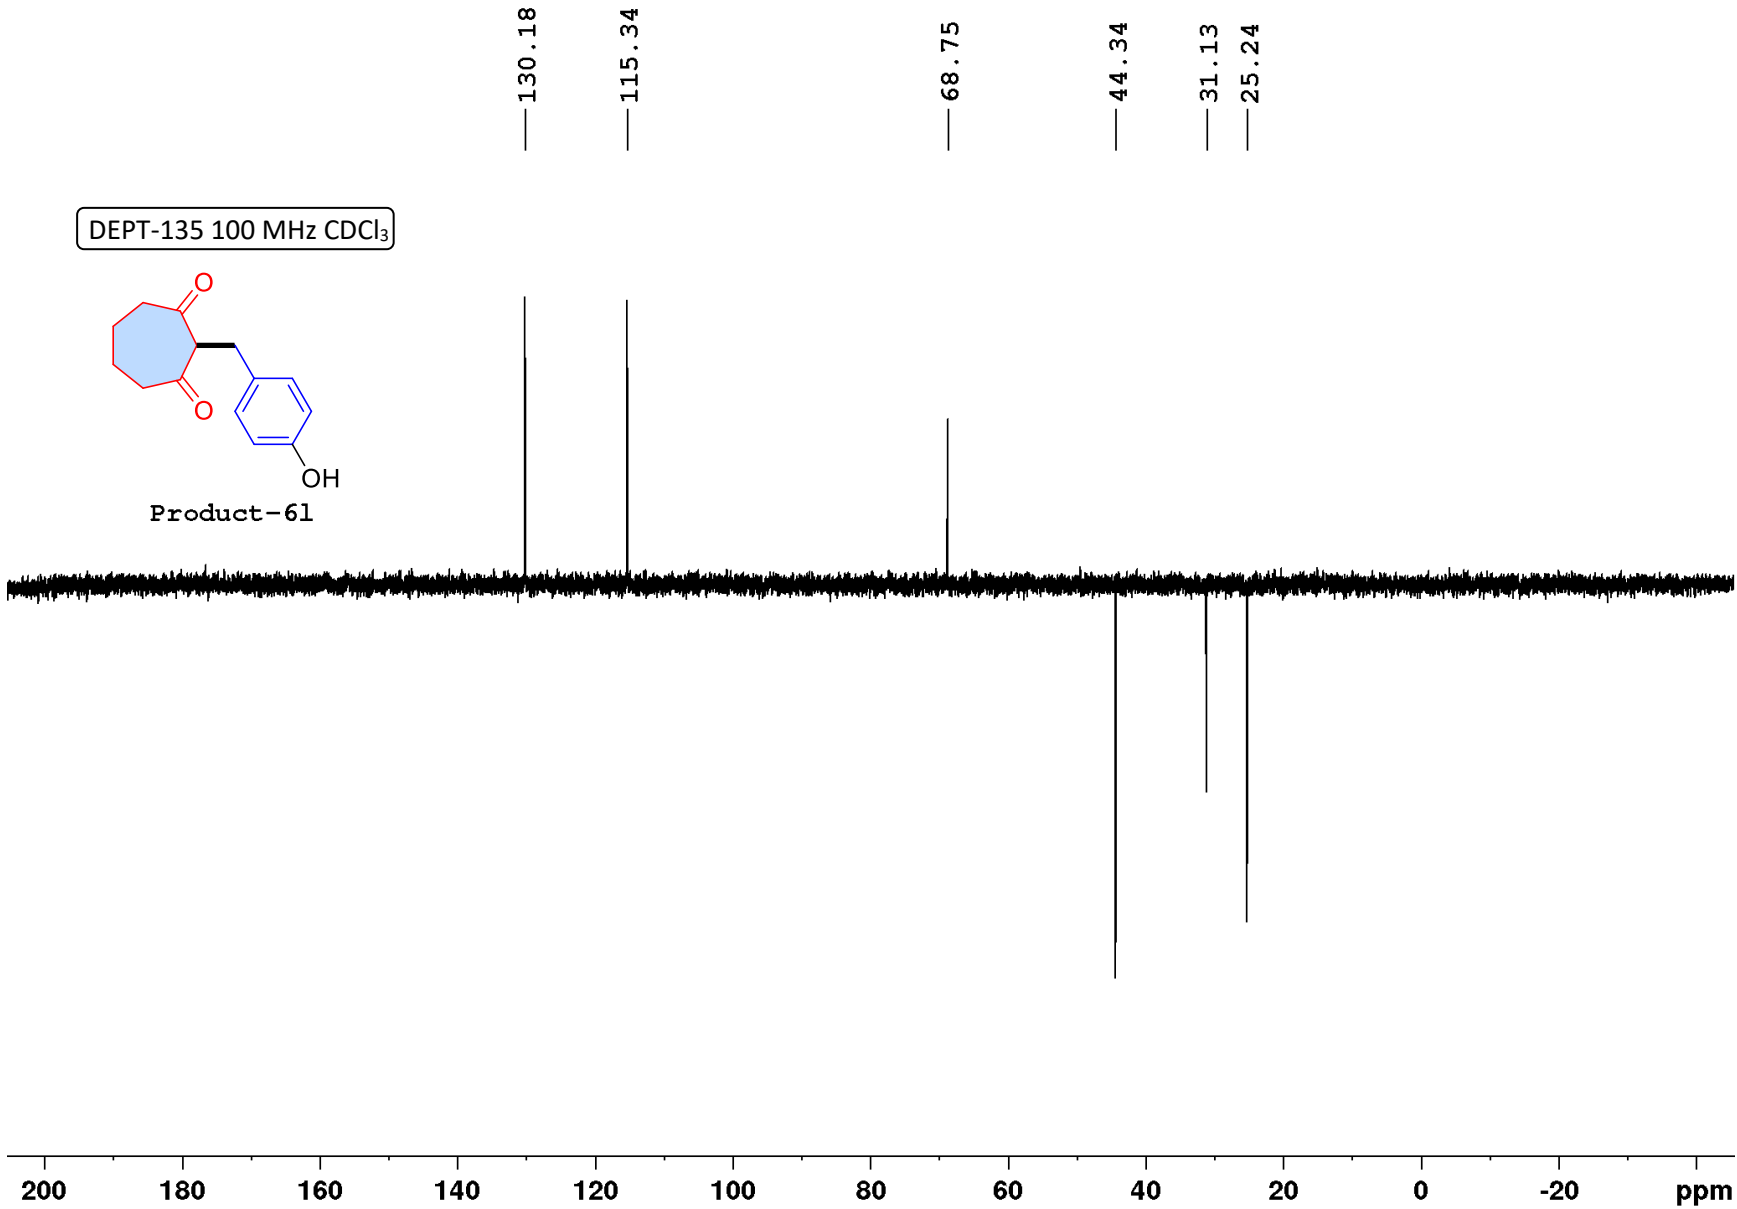

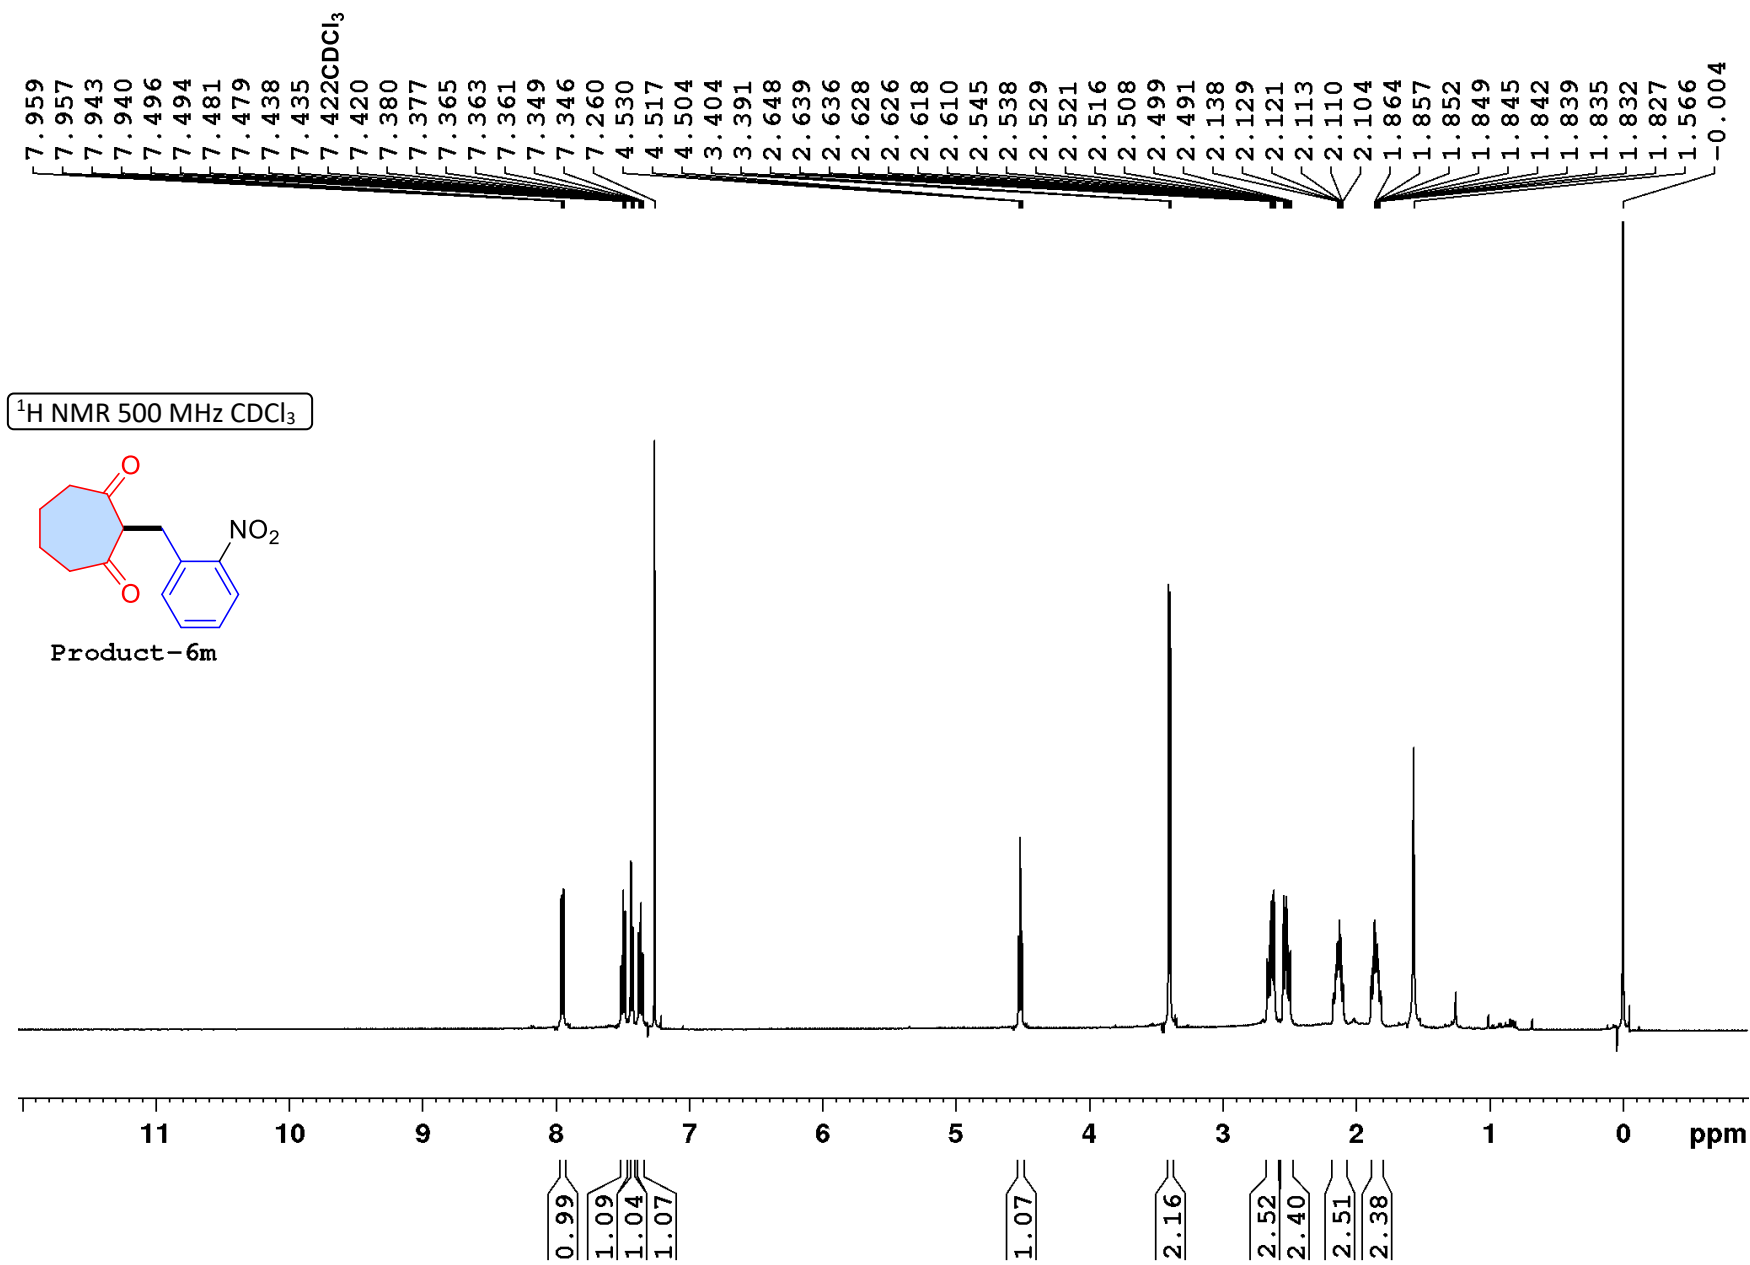

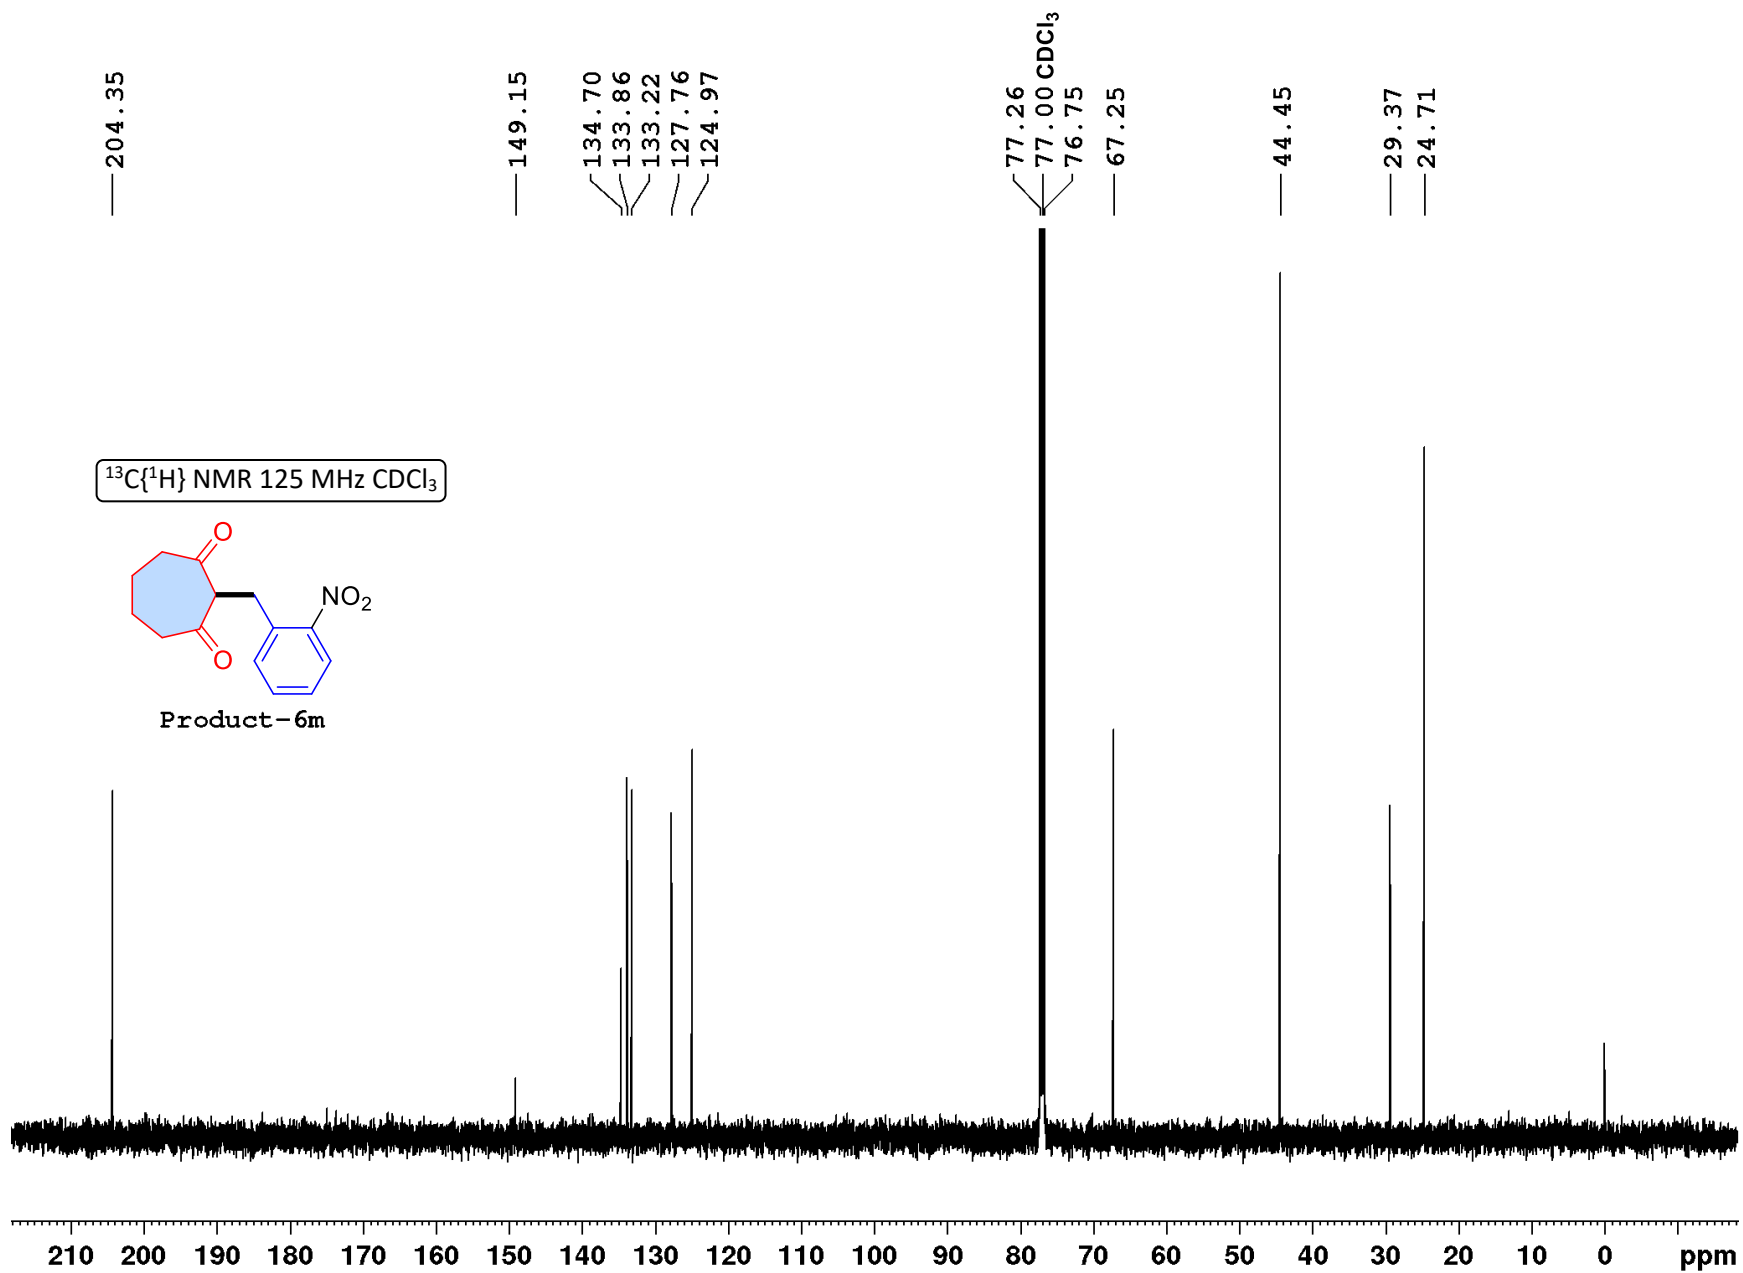



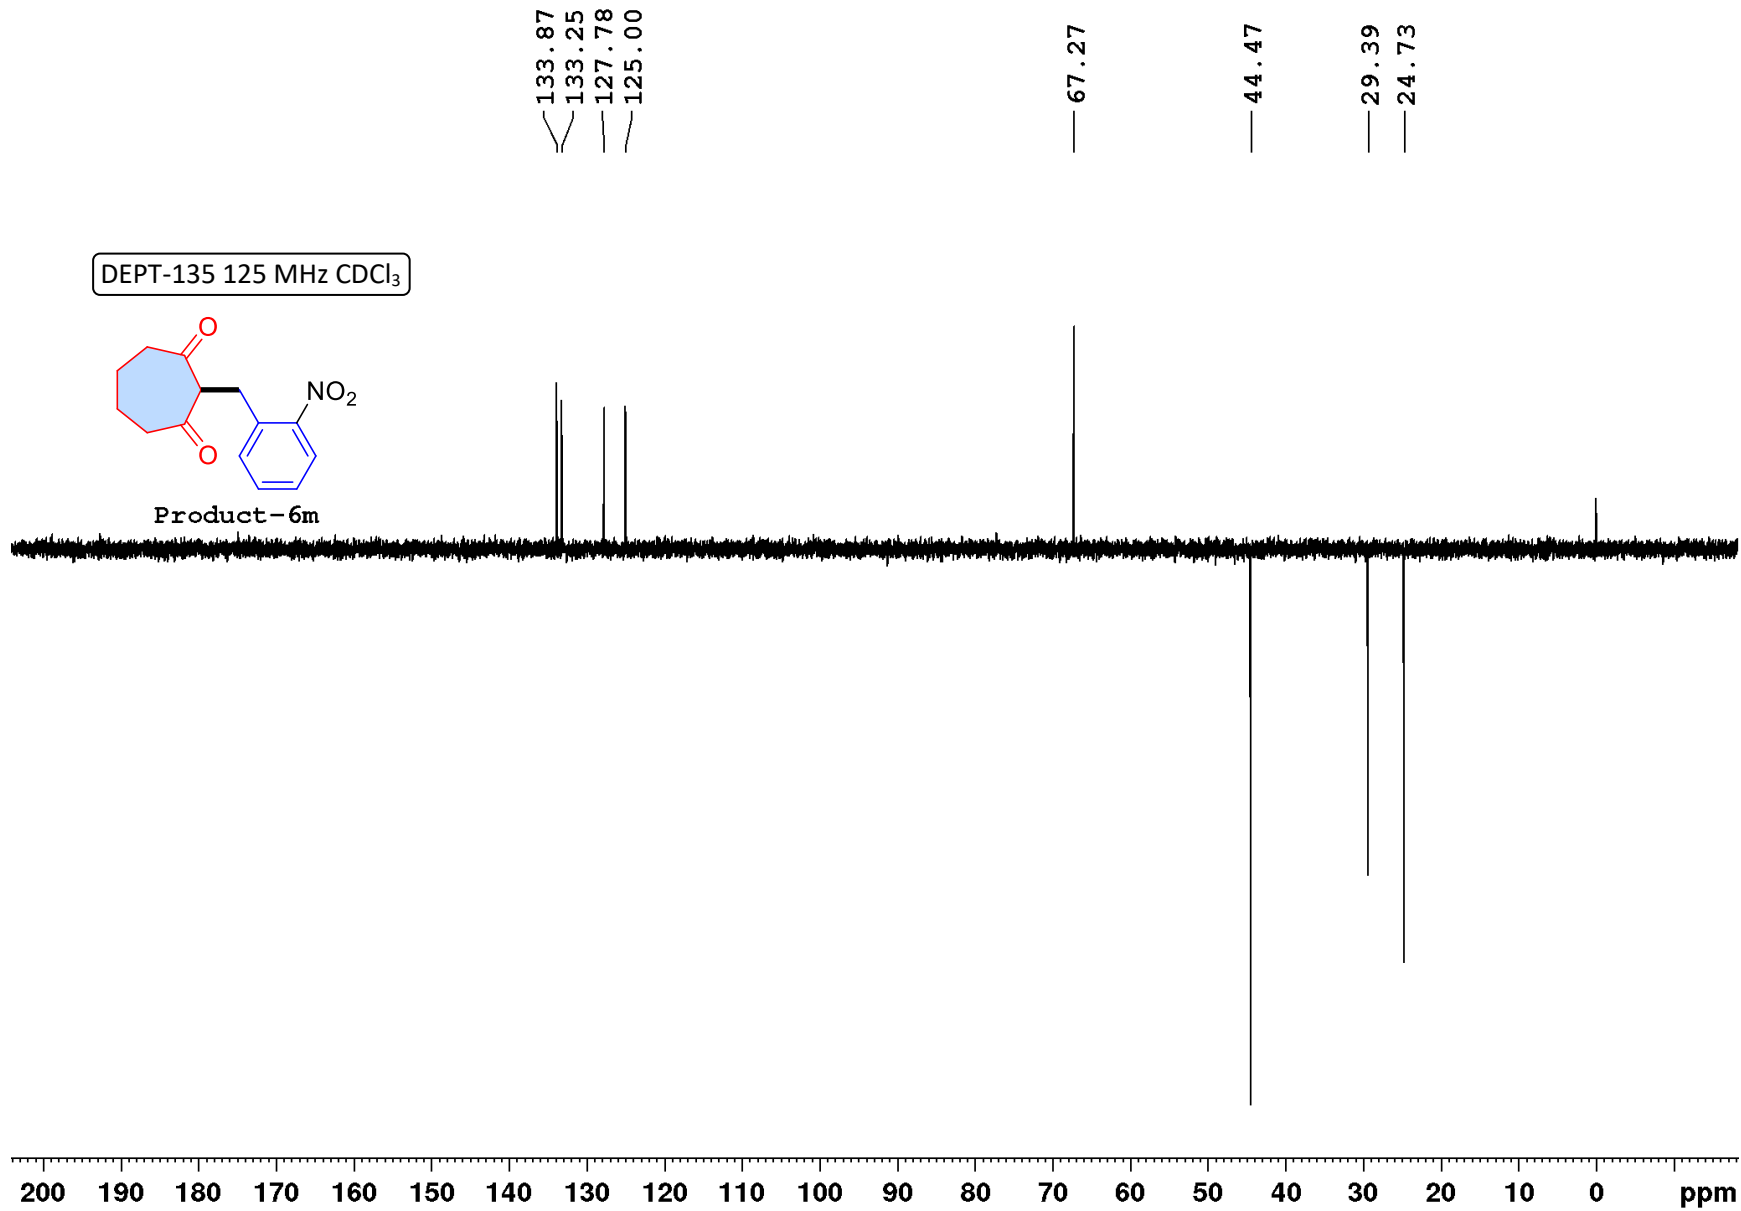

<sup>1</sup>H NMR 500 MHz CDCl<sub>3</sub>

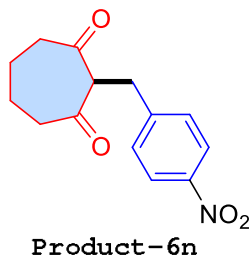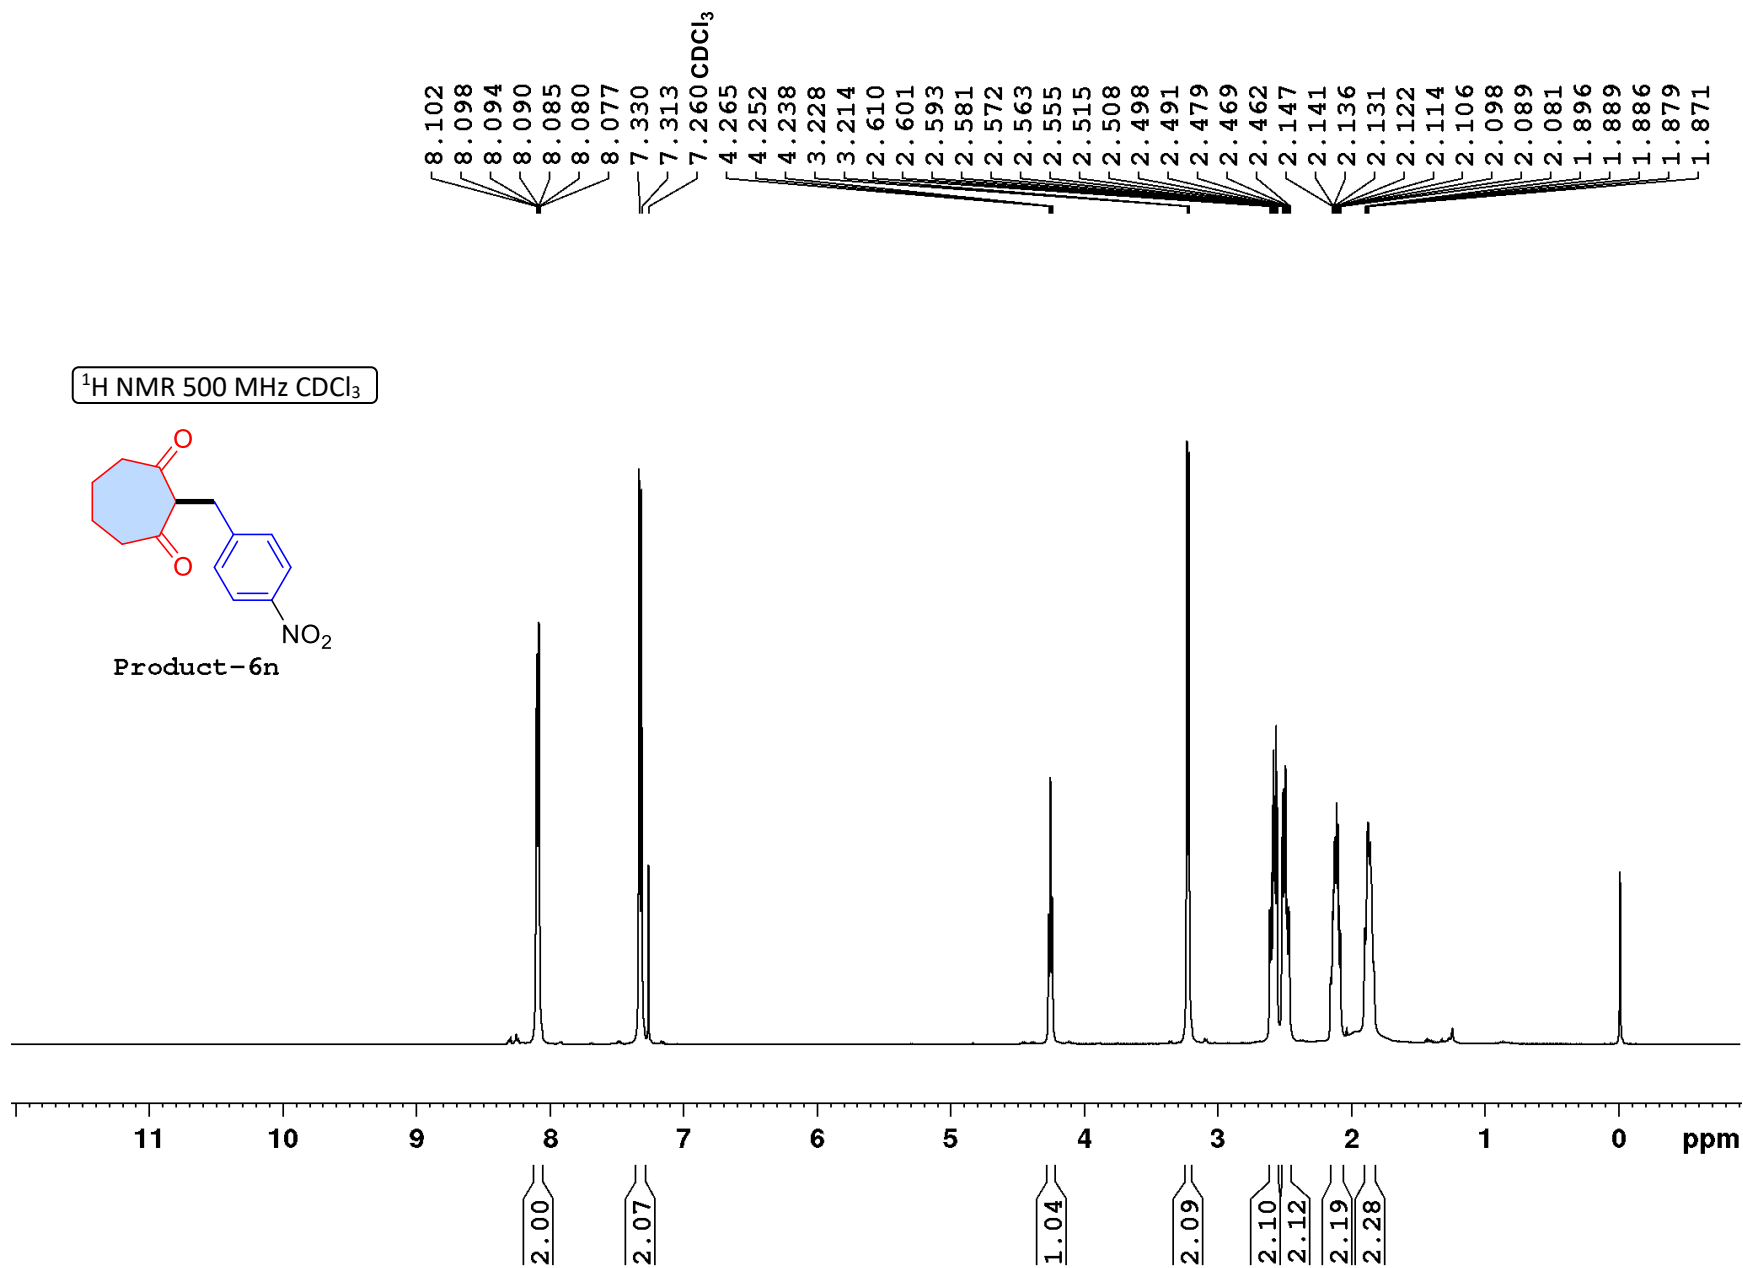

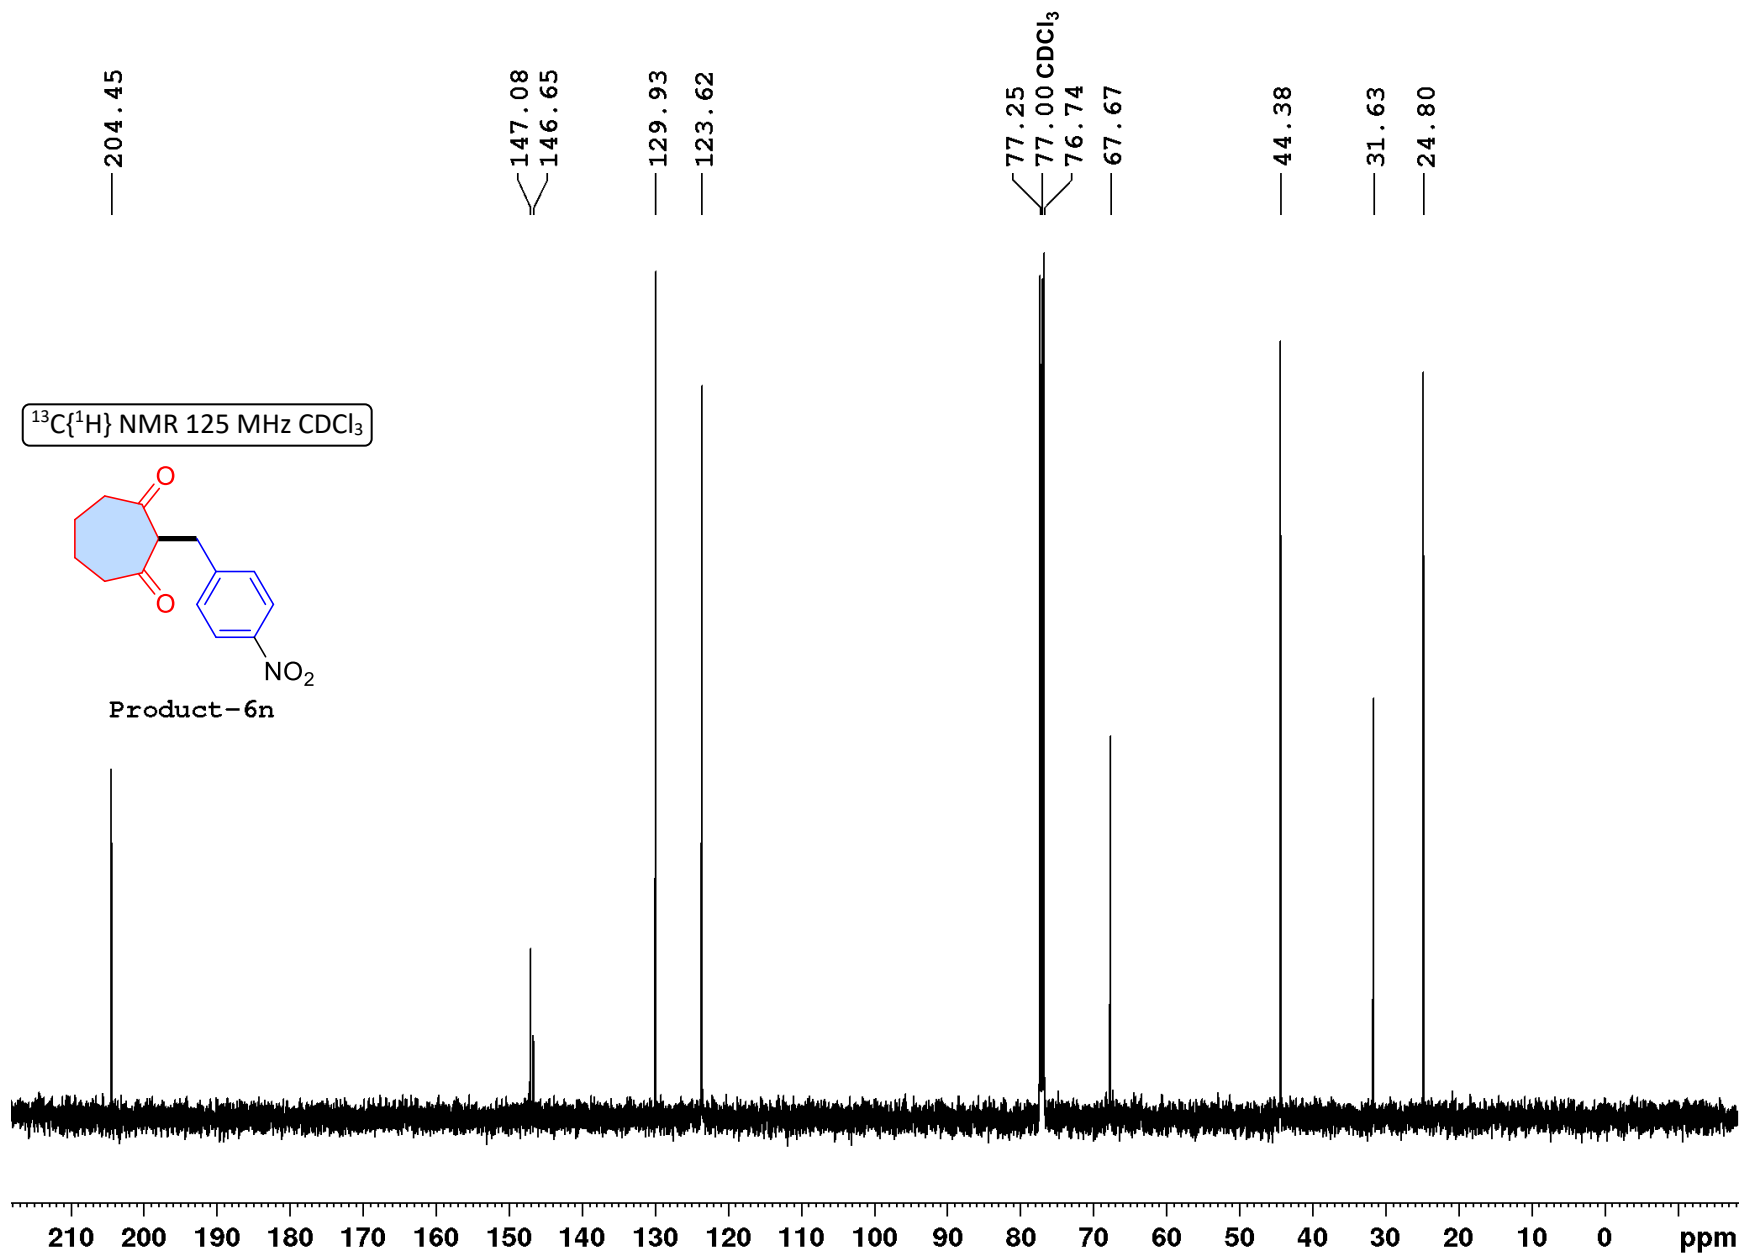

DEPT-135 125 MHz CDCl<sub>3</sub>

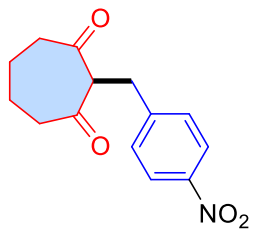

Product-6n

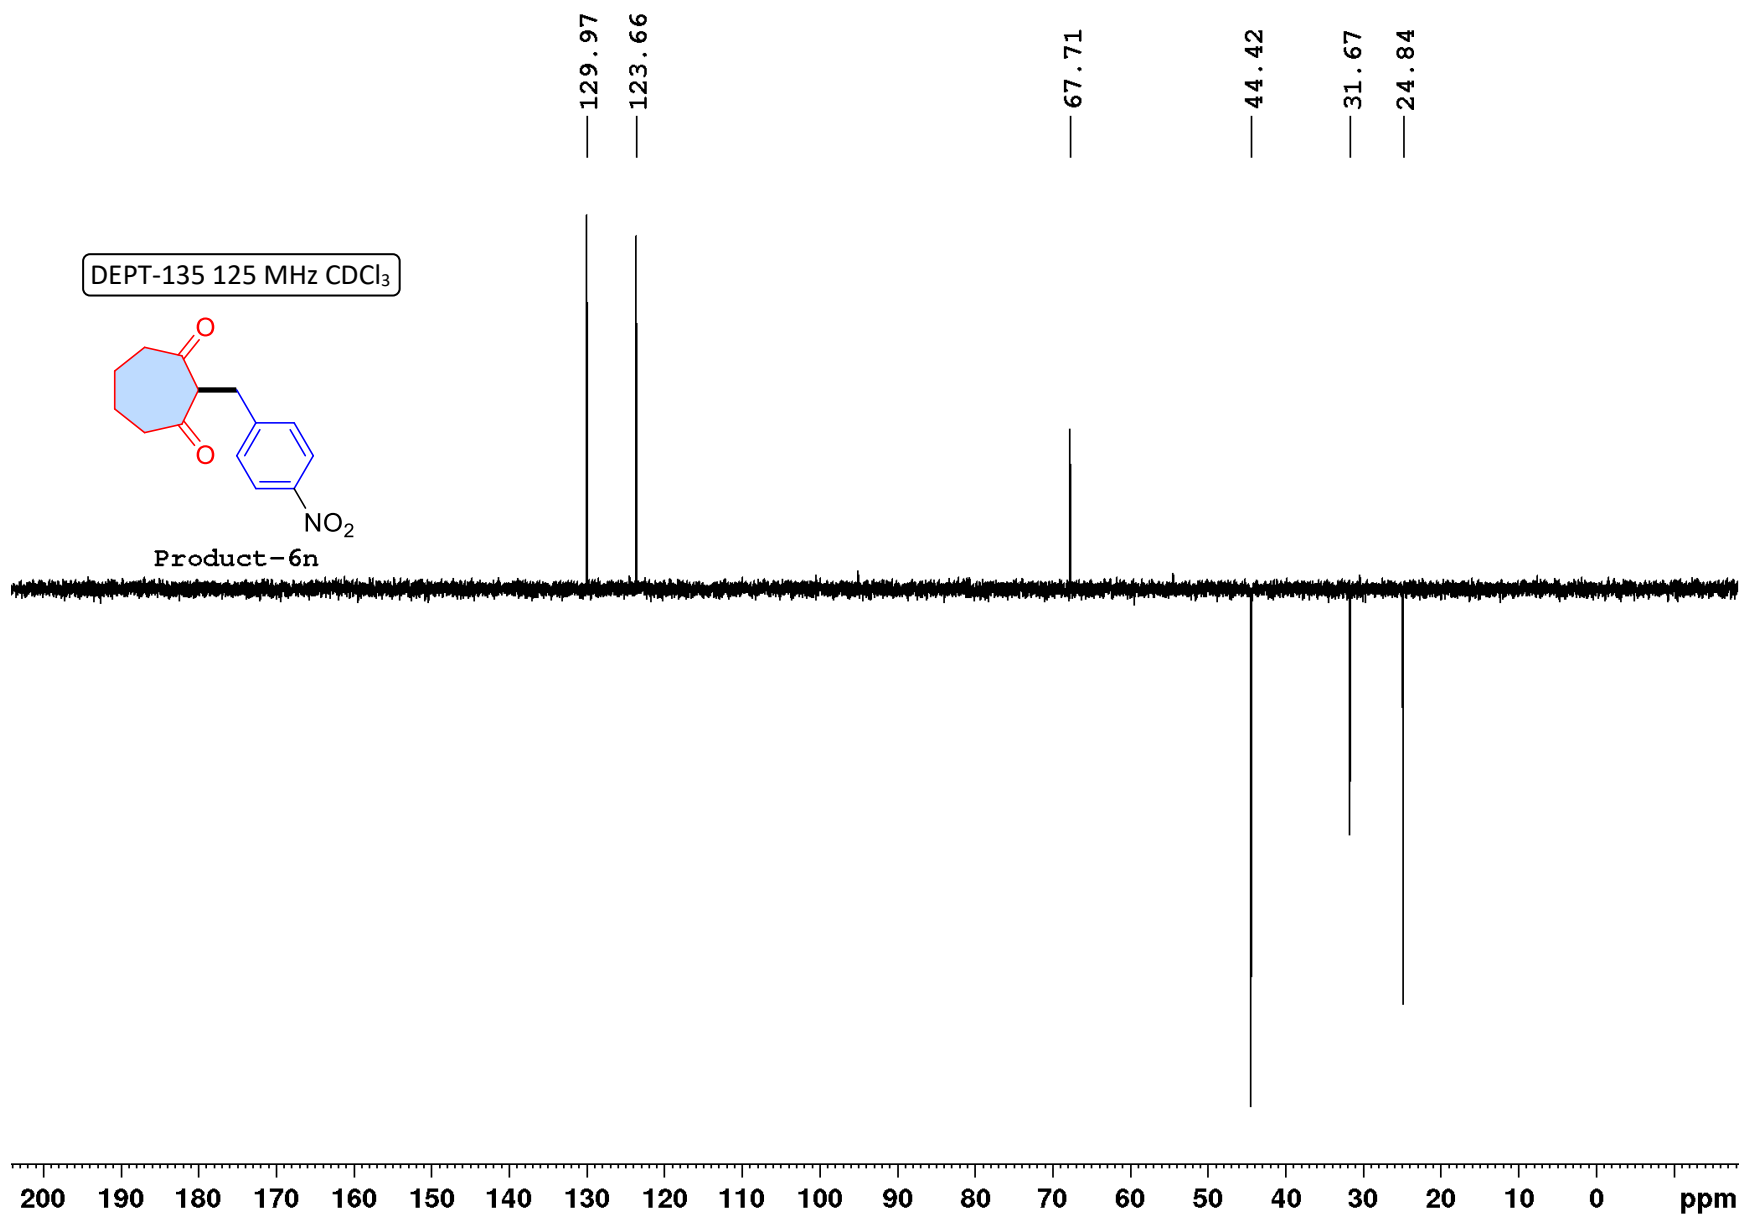

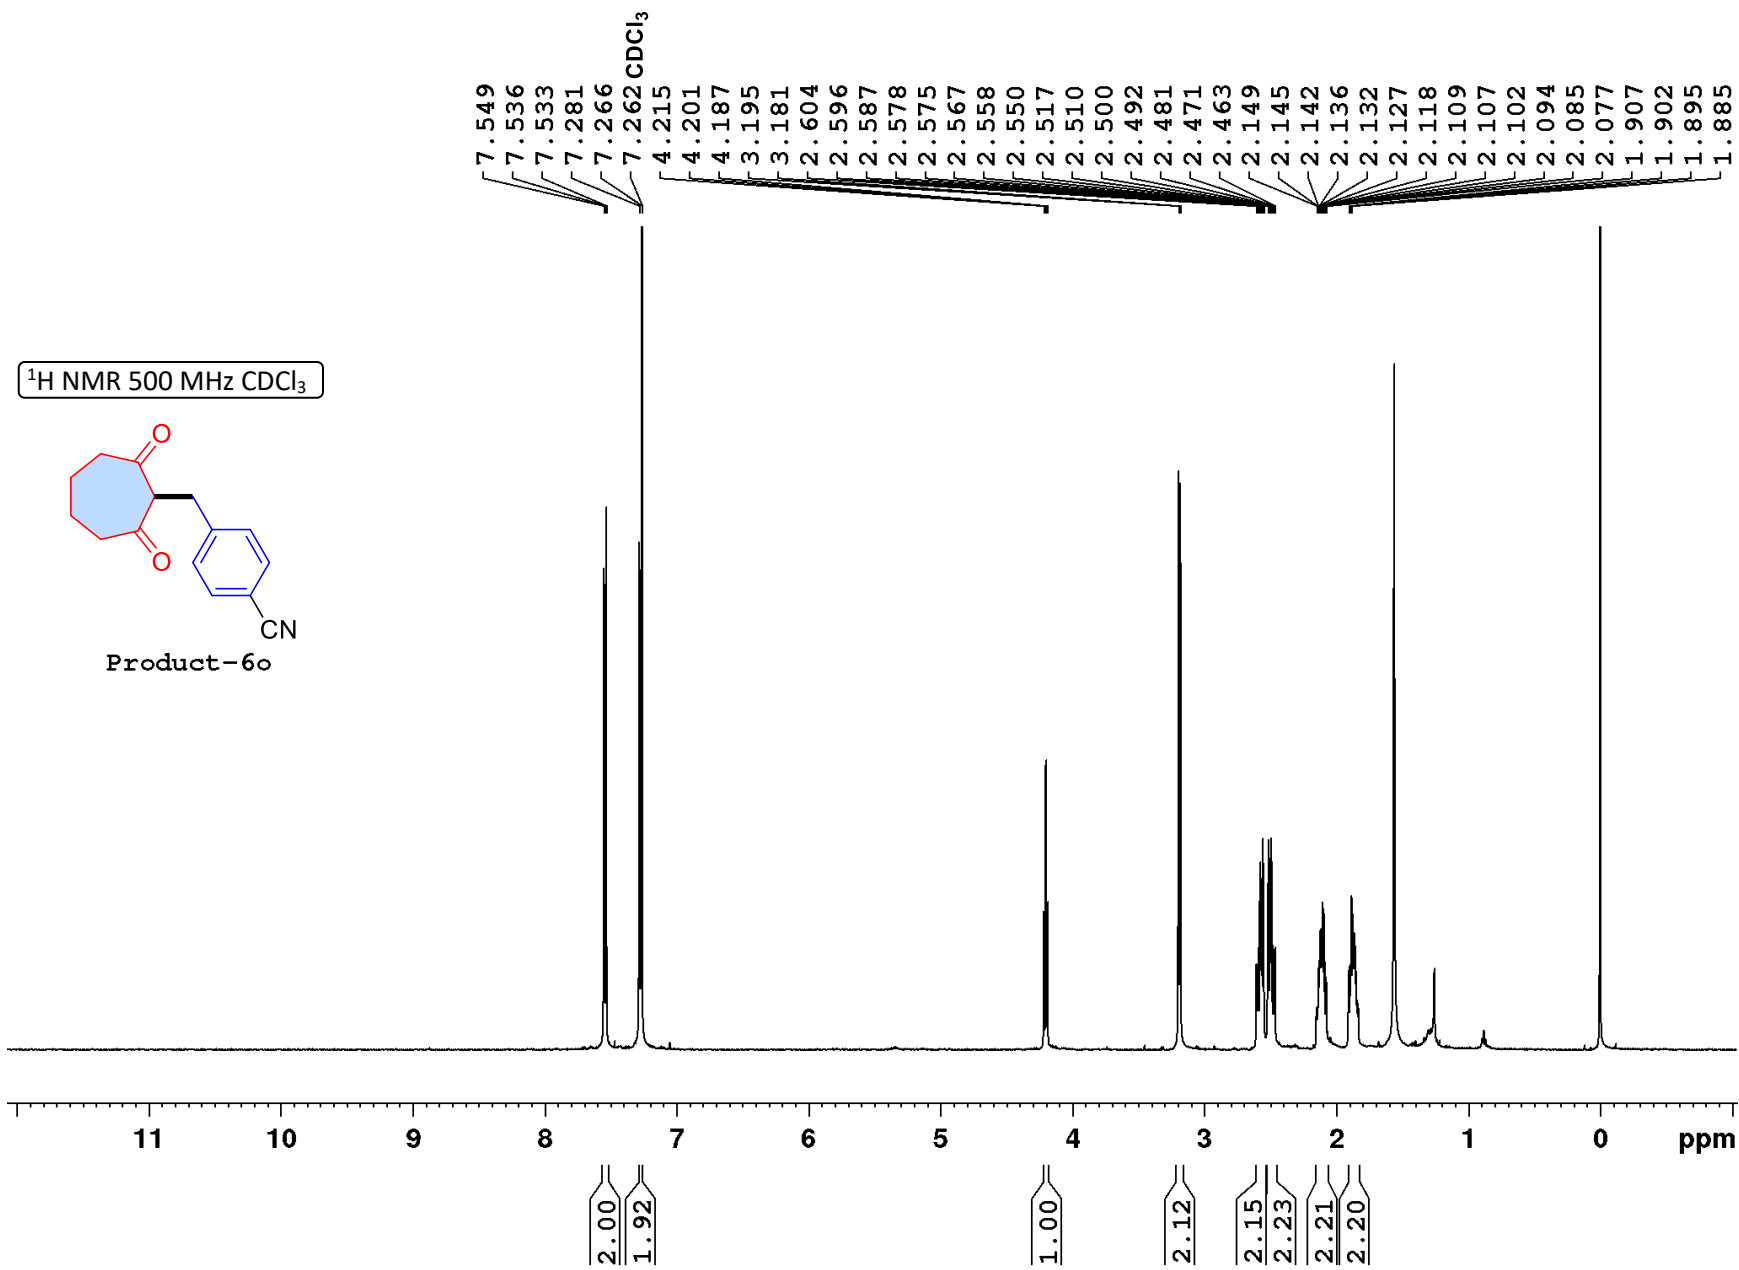

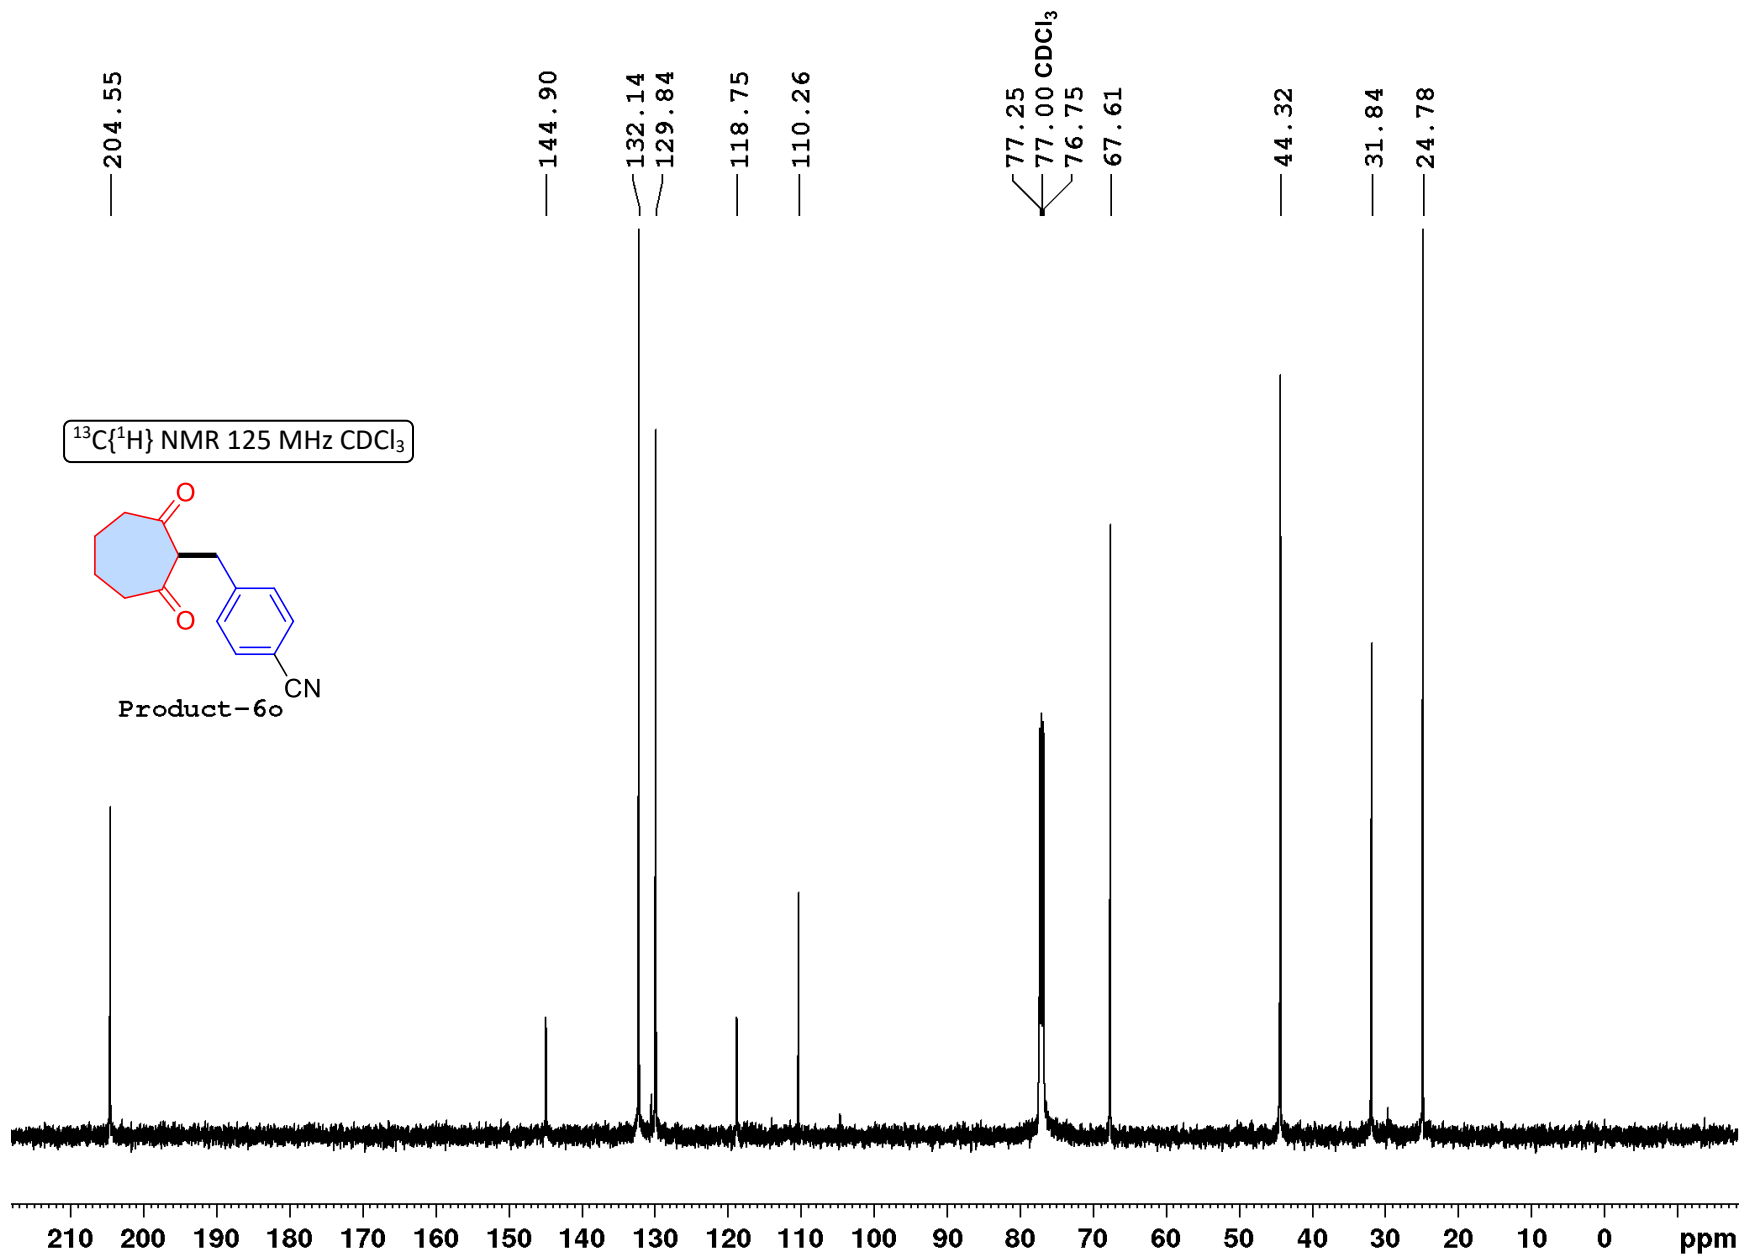

DEPT-135 125 MHz CDCl<sub>3</sub>

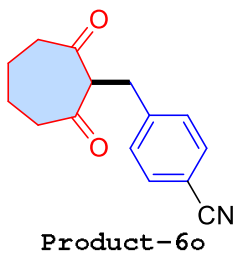

132.23  
129.92

67.70

44.41

31.92

24.86

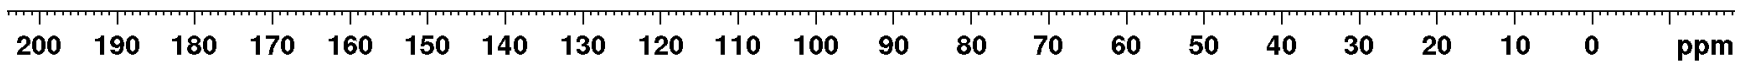

<sup>1</sup>H NMR 500 MHz CDCl<sub>3</sub>

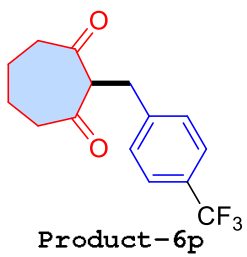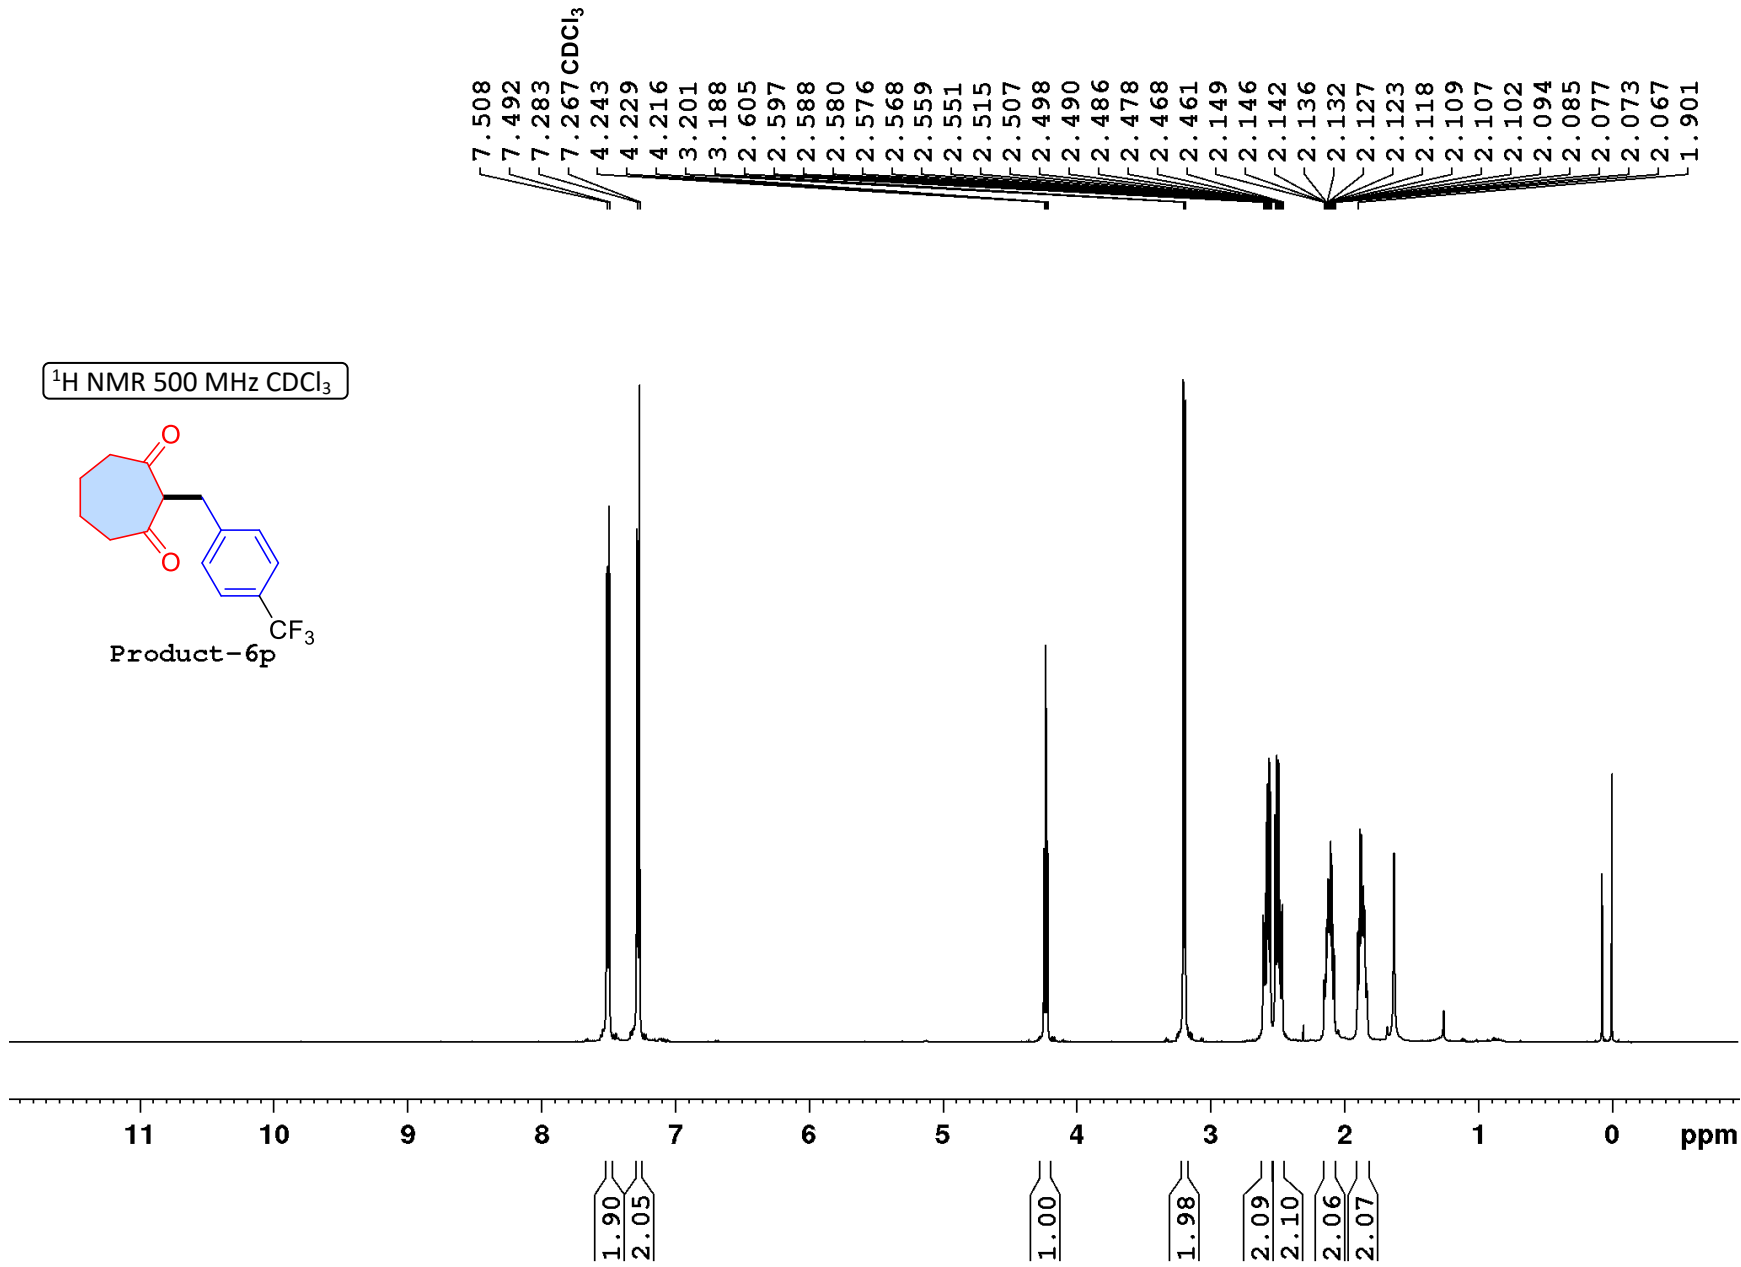



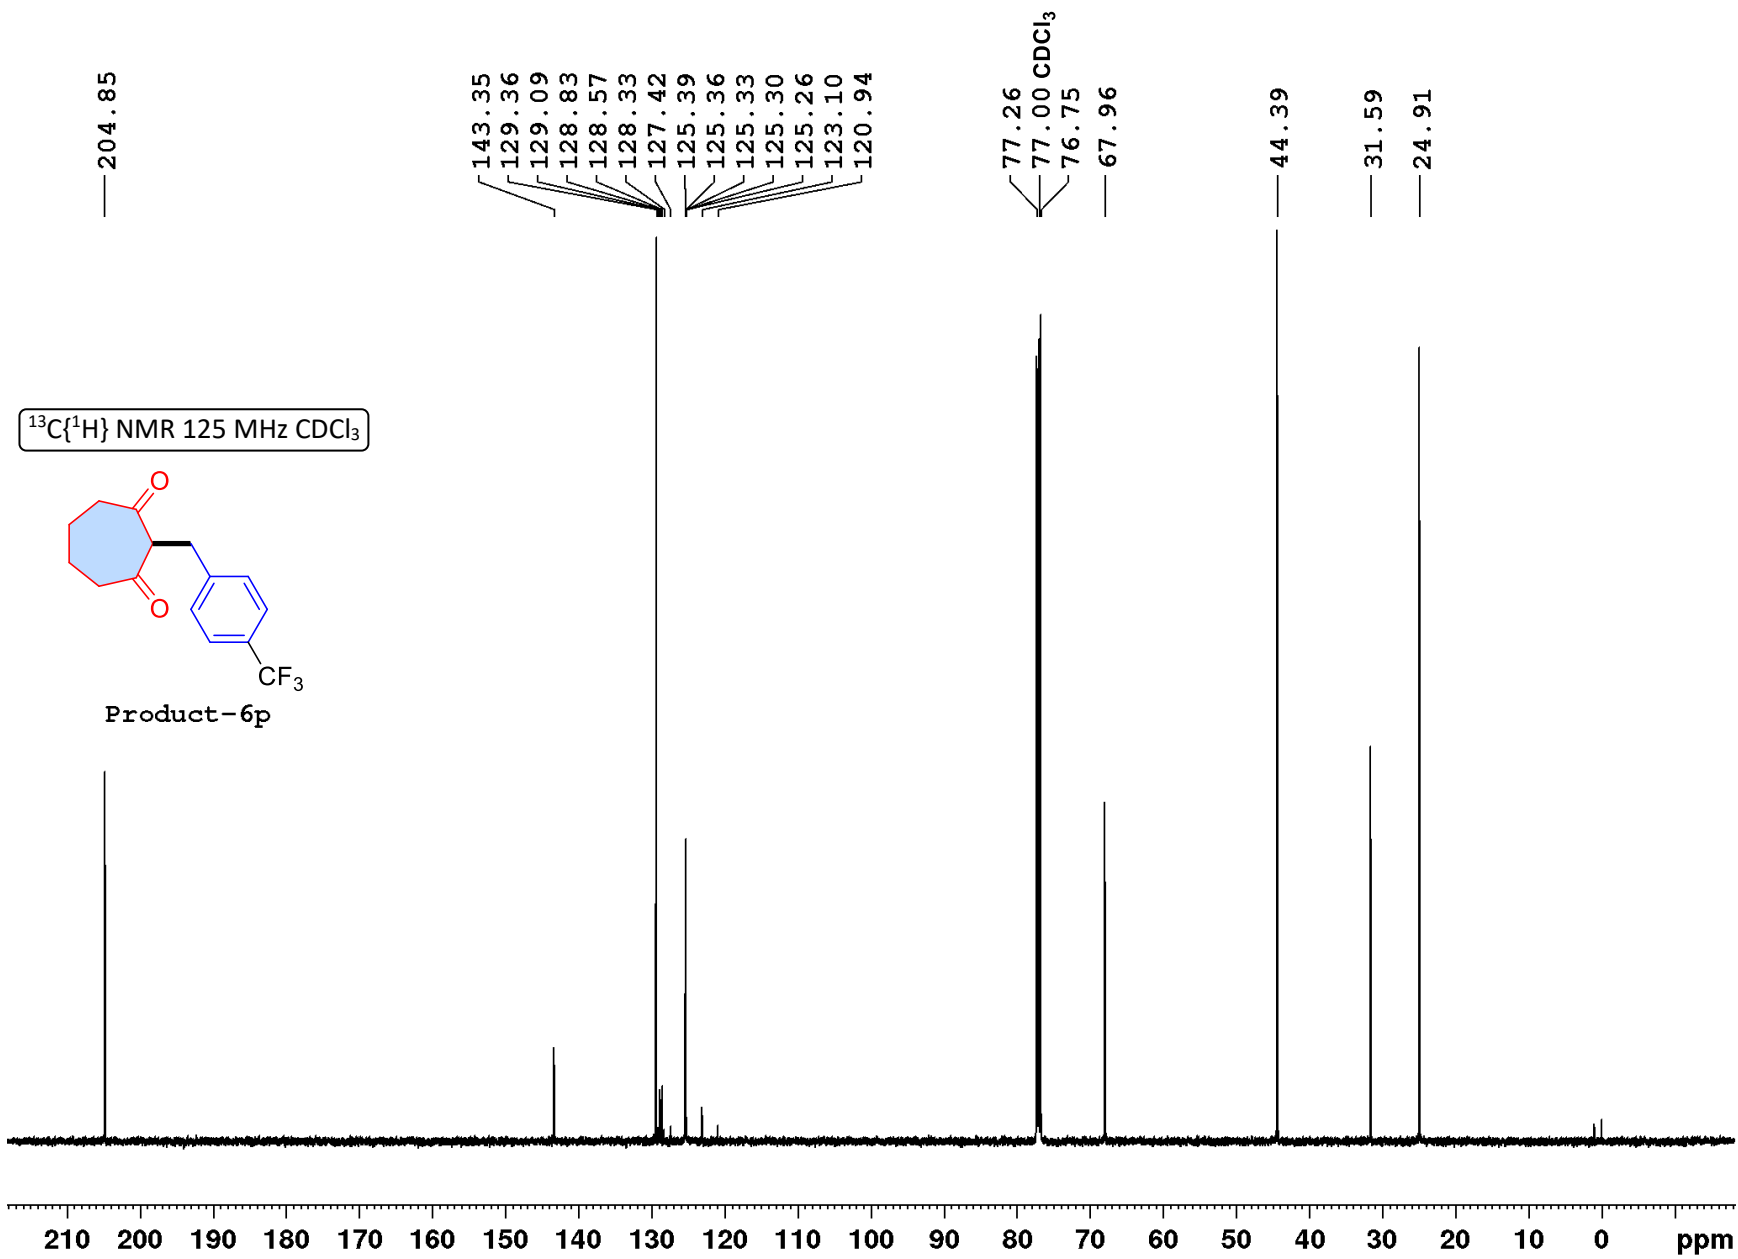

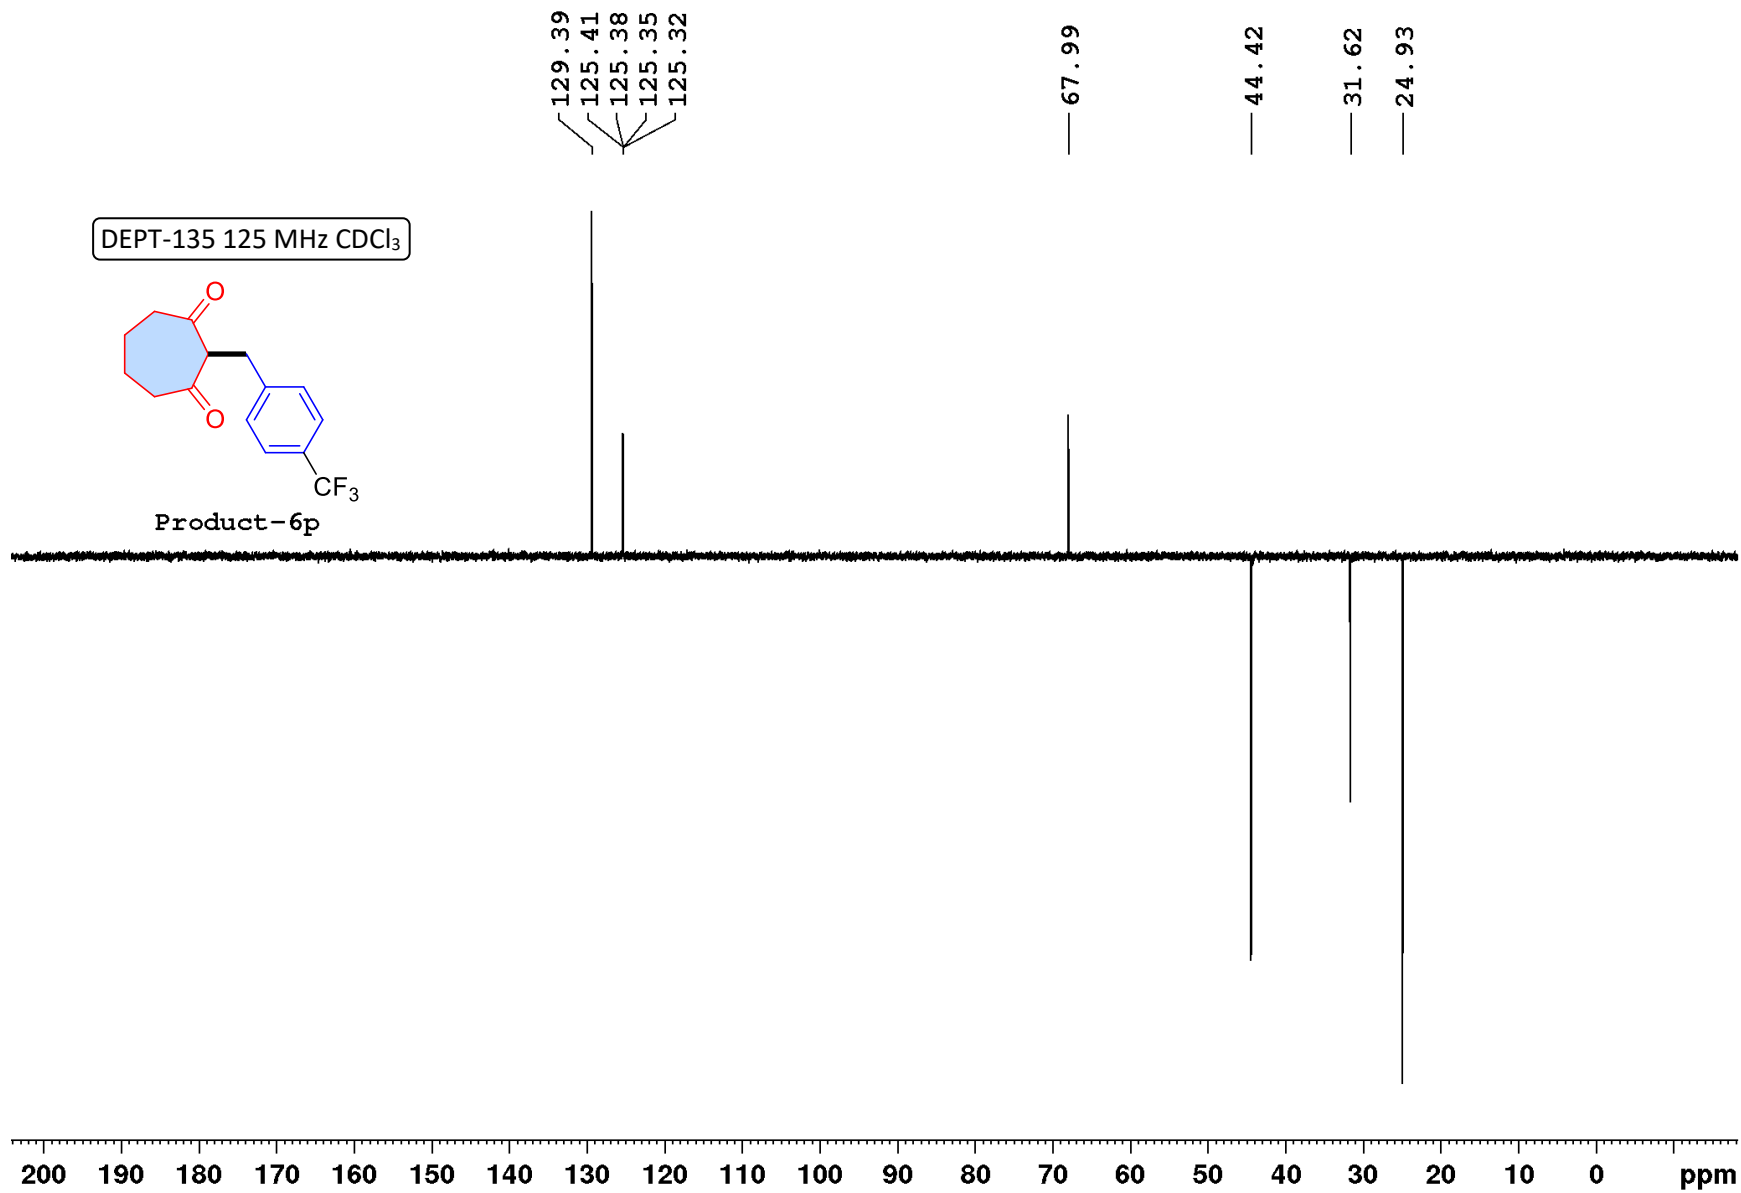

$^{19}\text{F}$  NMR 375 MHz  $\text{CDCl}_3$

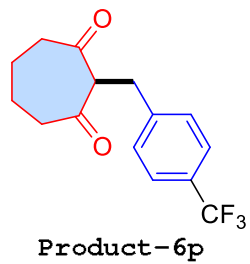

-62.466

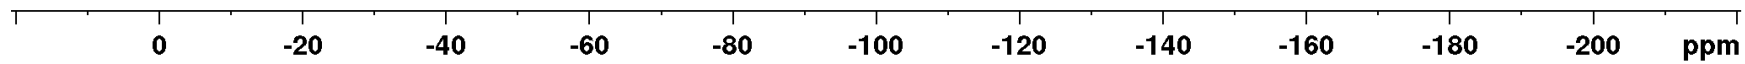

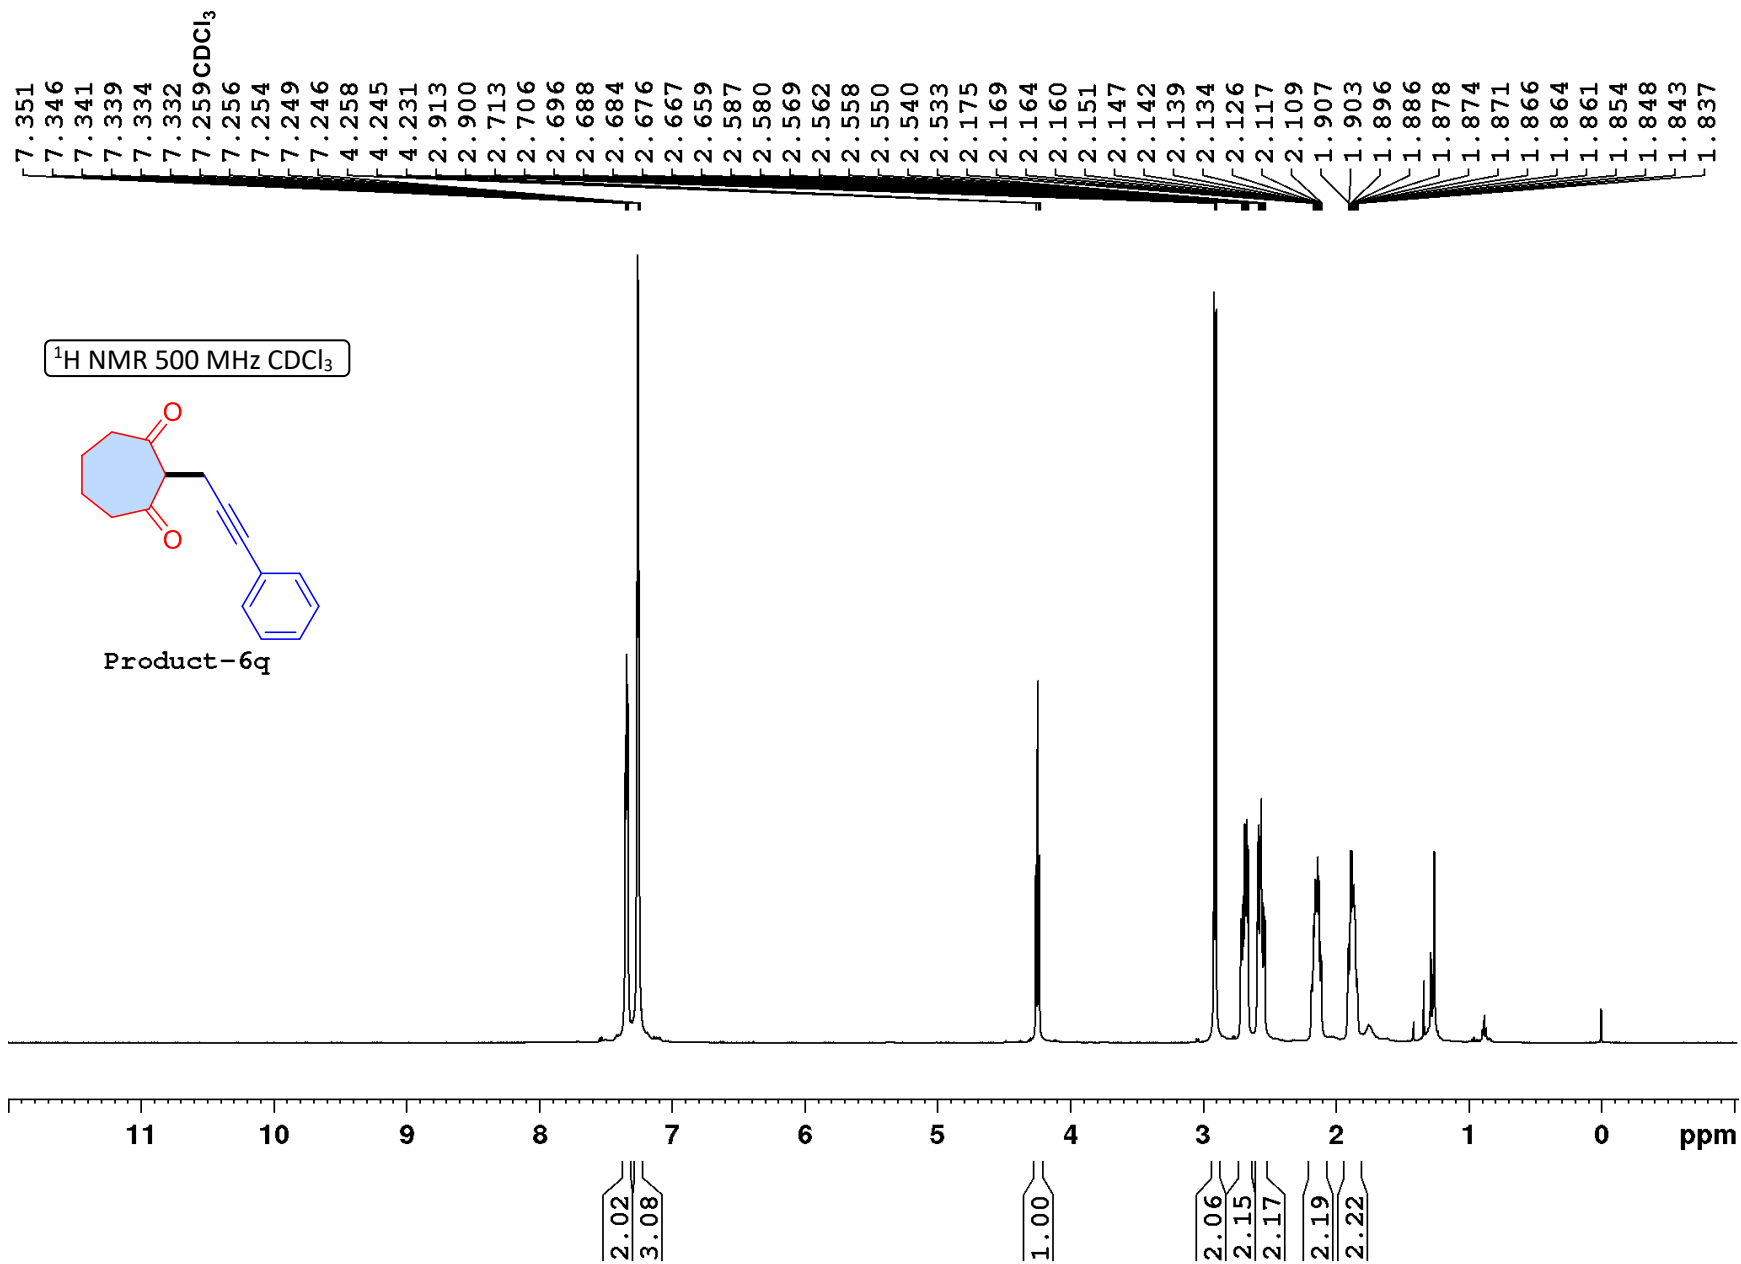

$^{13}\text{C}\{^1\text{H}\}$  NMR 125 MHz  $\text{CDCl}_3$

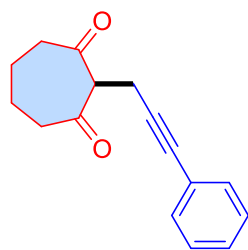

Product-6q

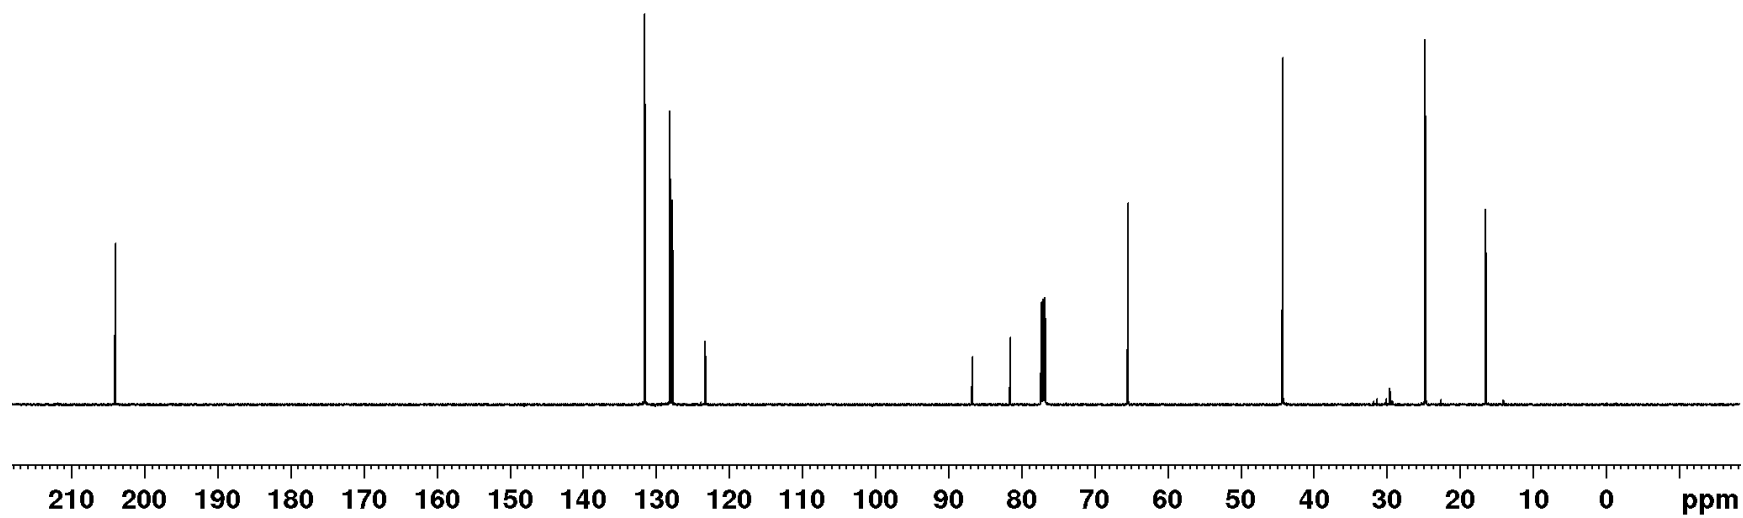

— 204.01

131.53  
128.09  
127.76  
123.27

86.72  
81.51  
77.26  
77.00  $\text{CDCl}_3$   
76.75  
— 65.42

— 44.23

— 24.72

— 16.43

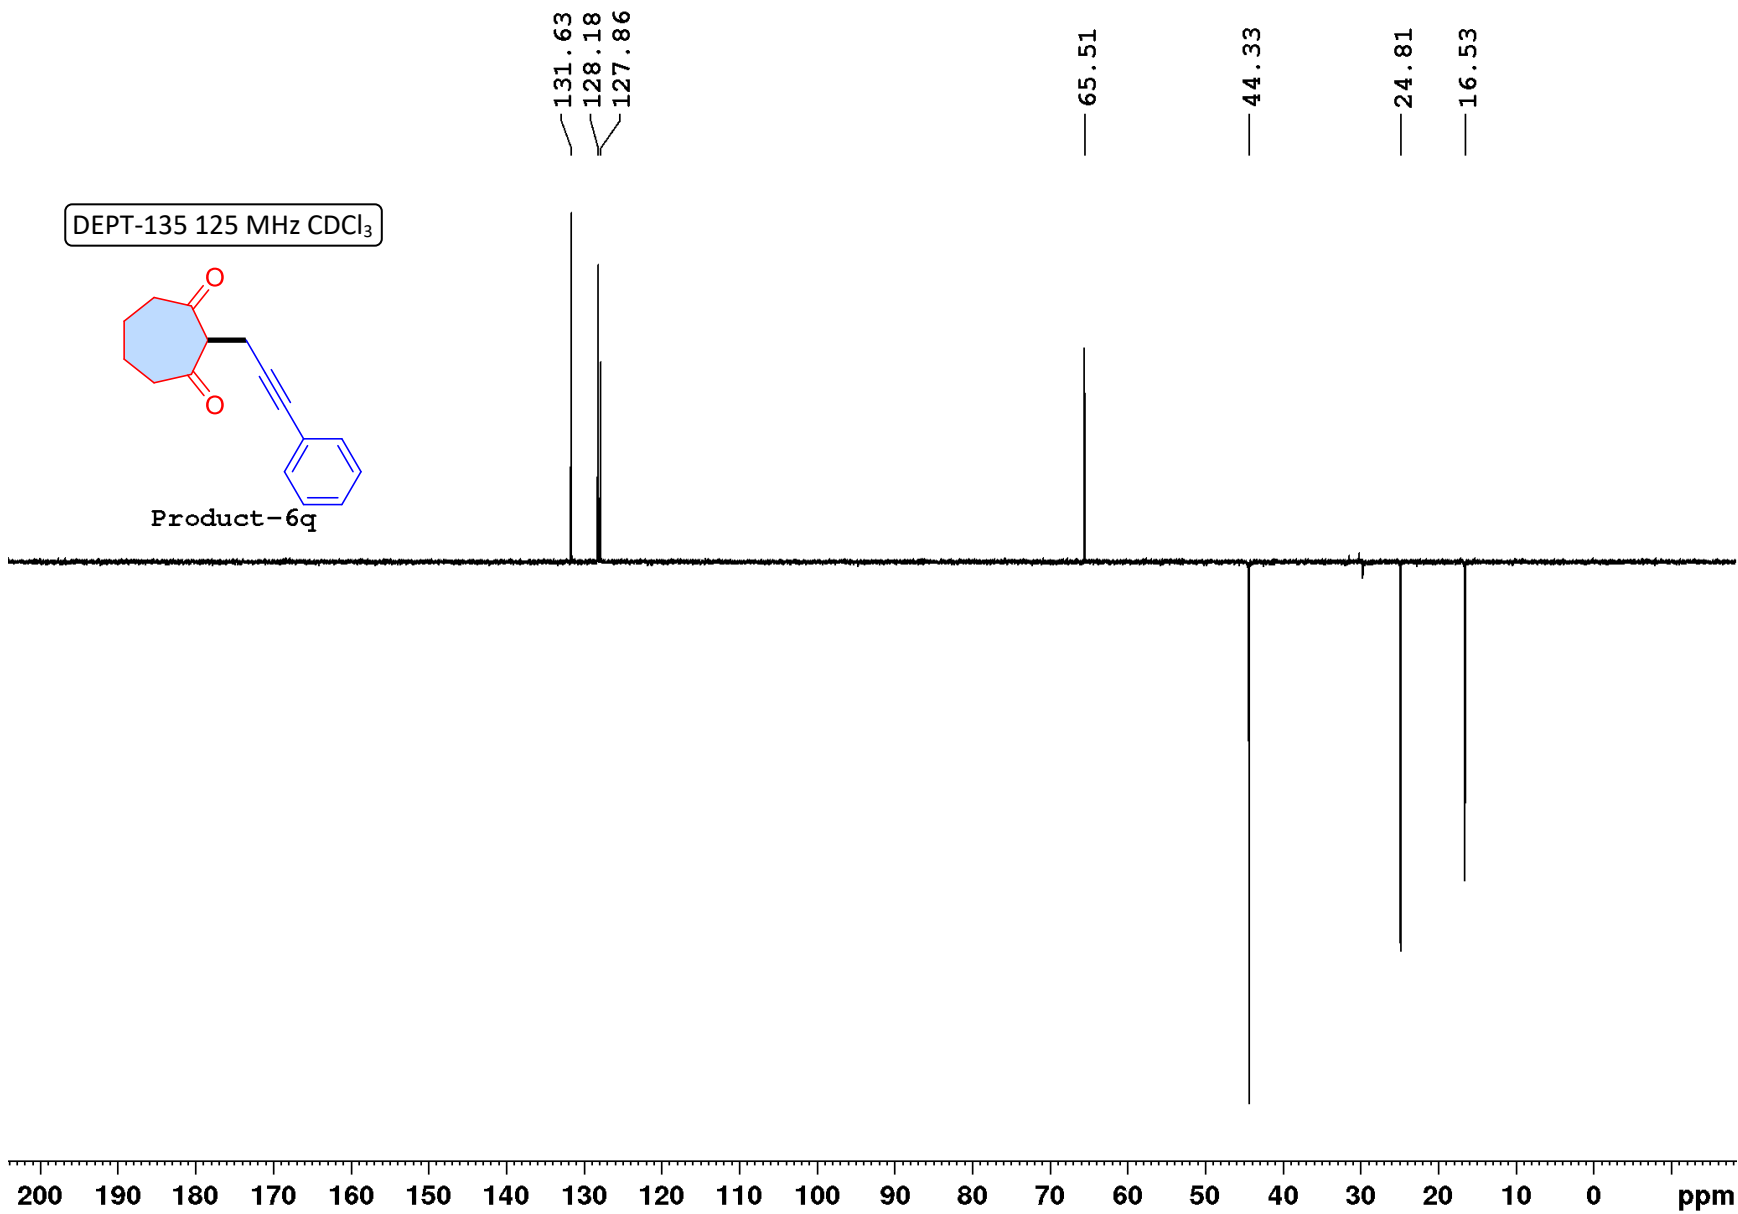

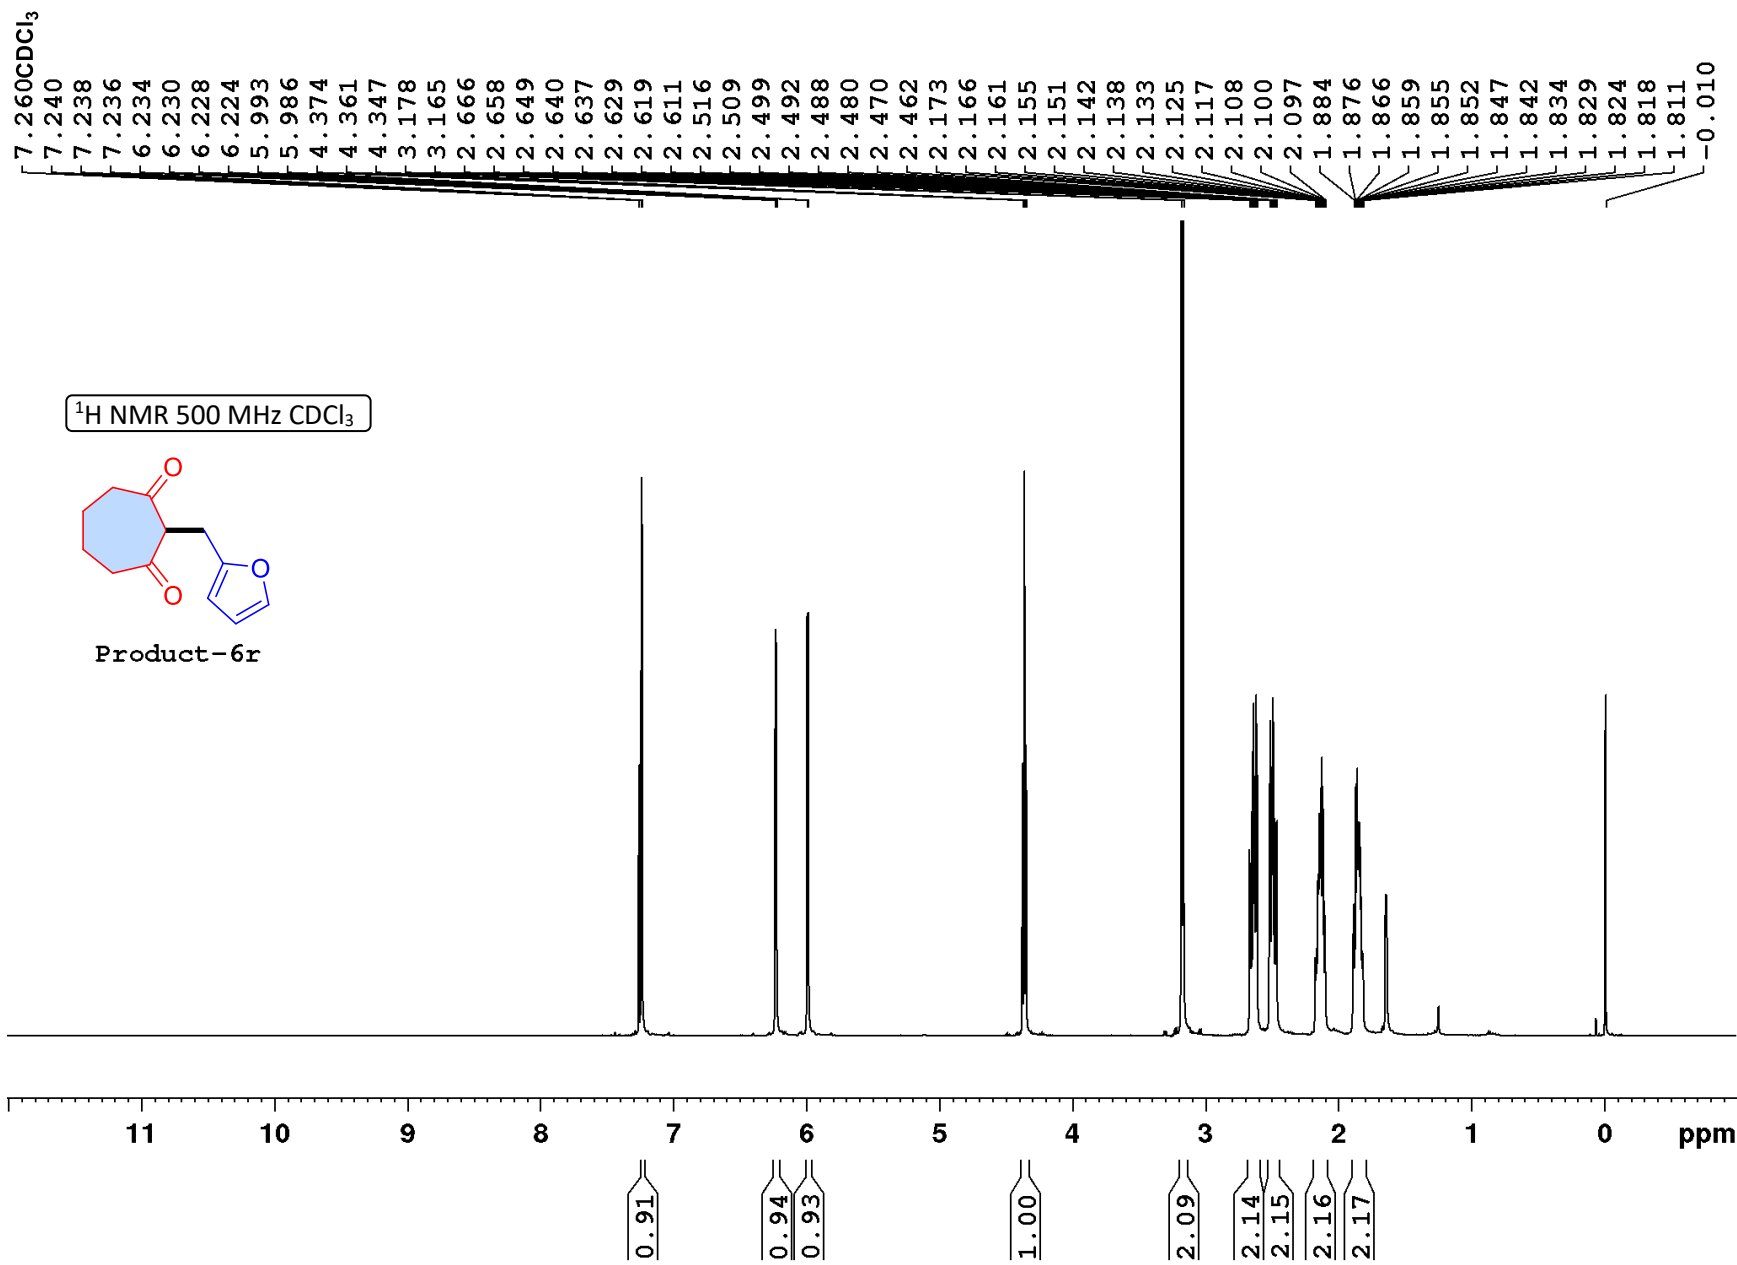

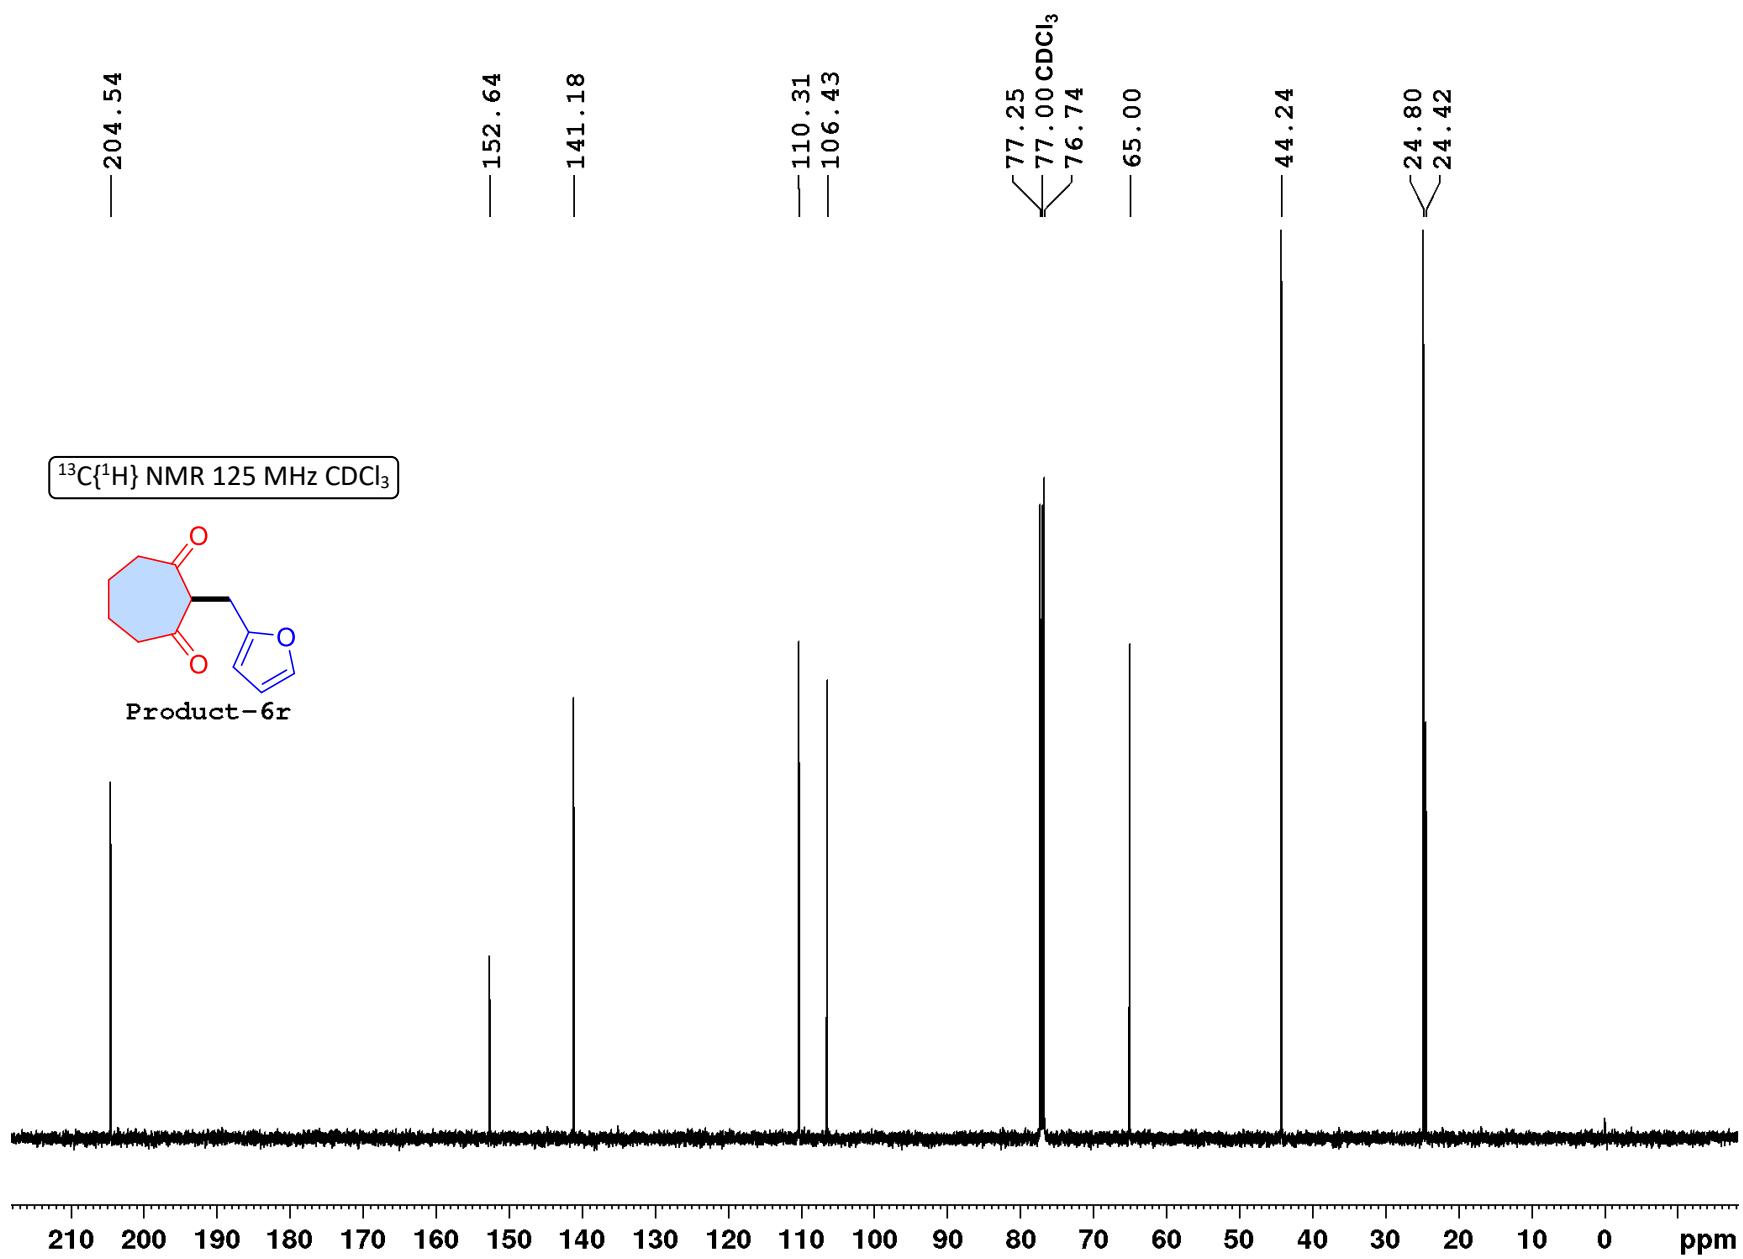



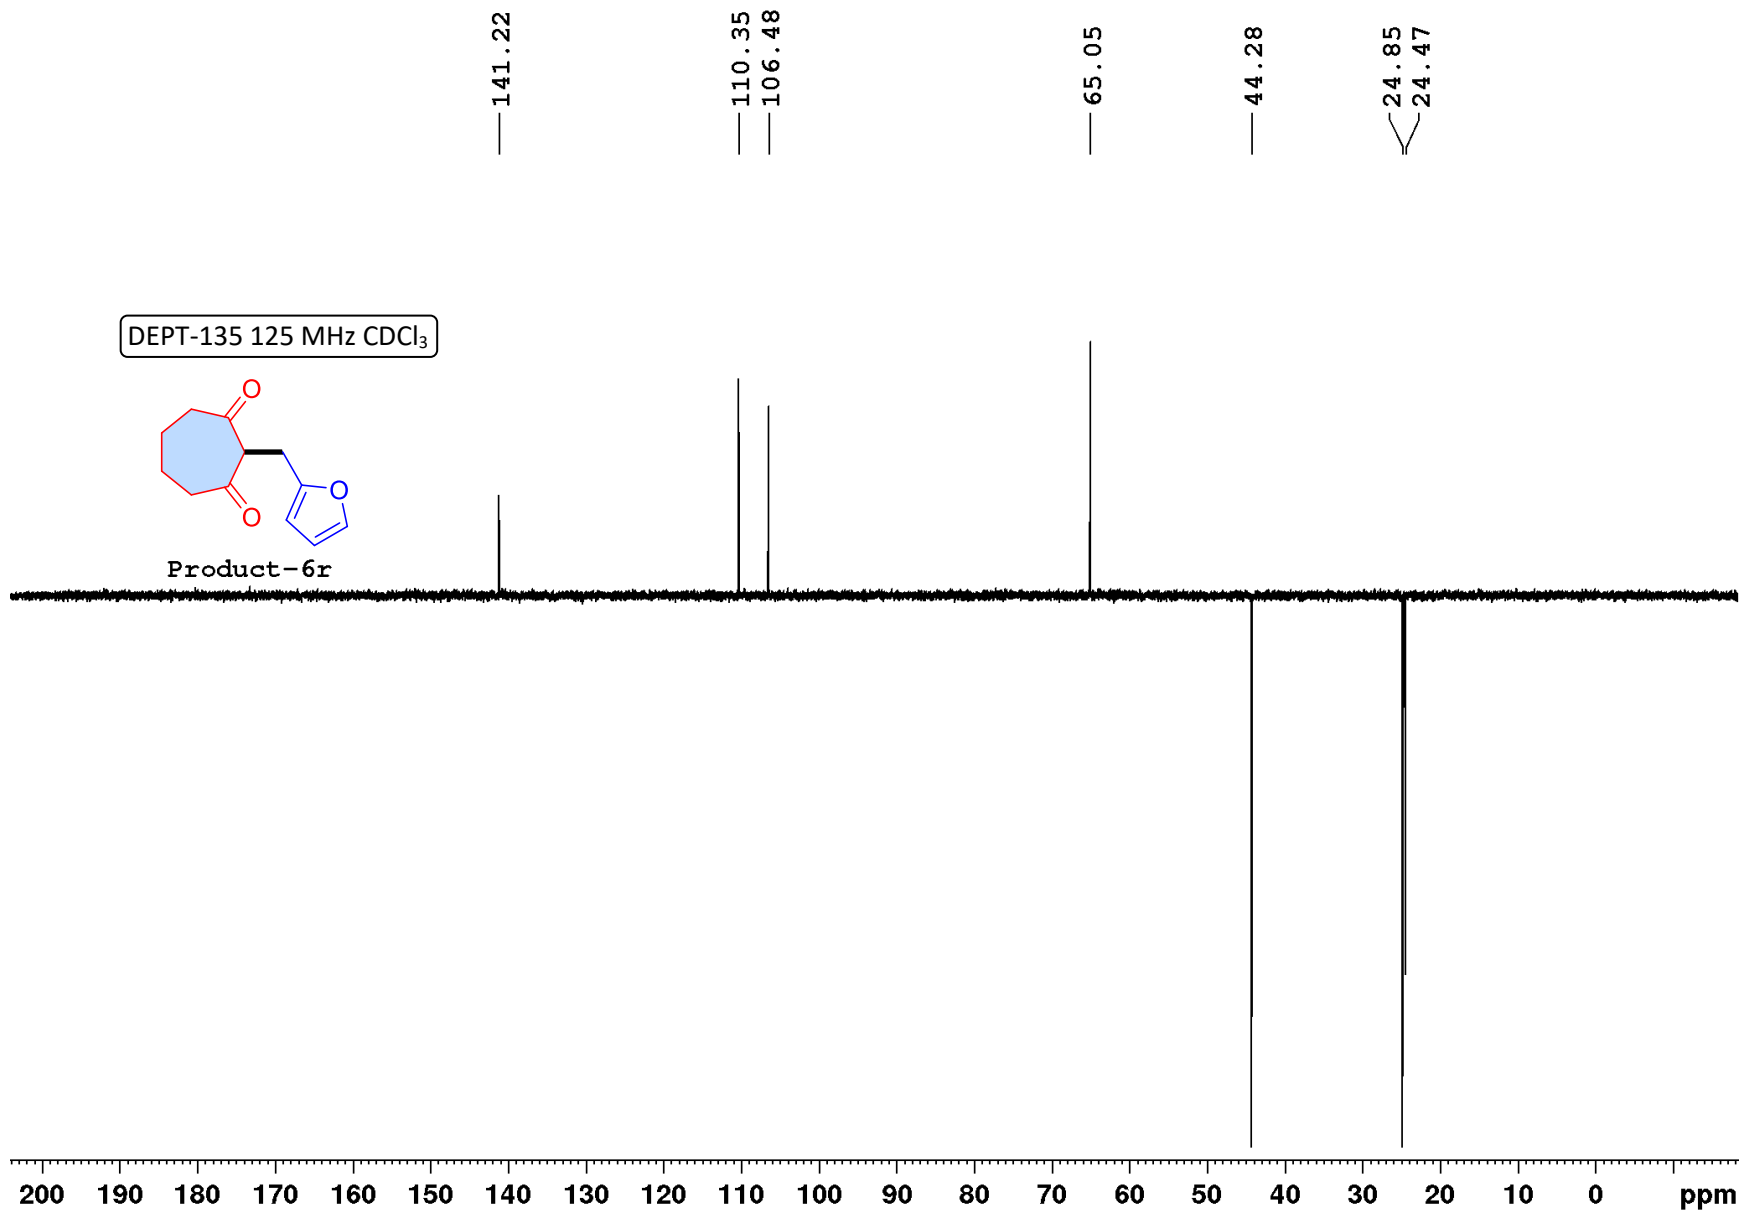

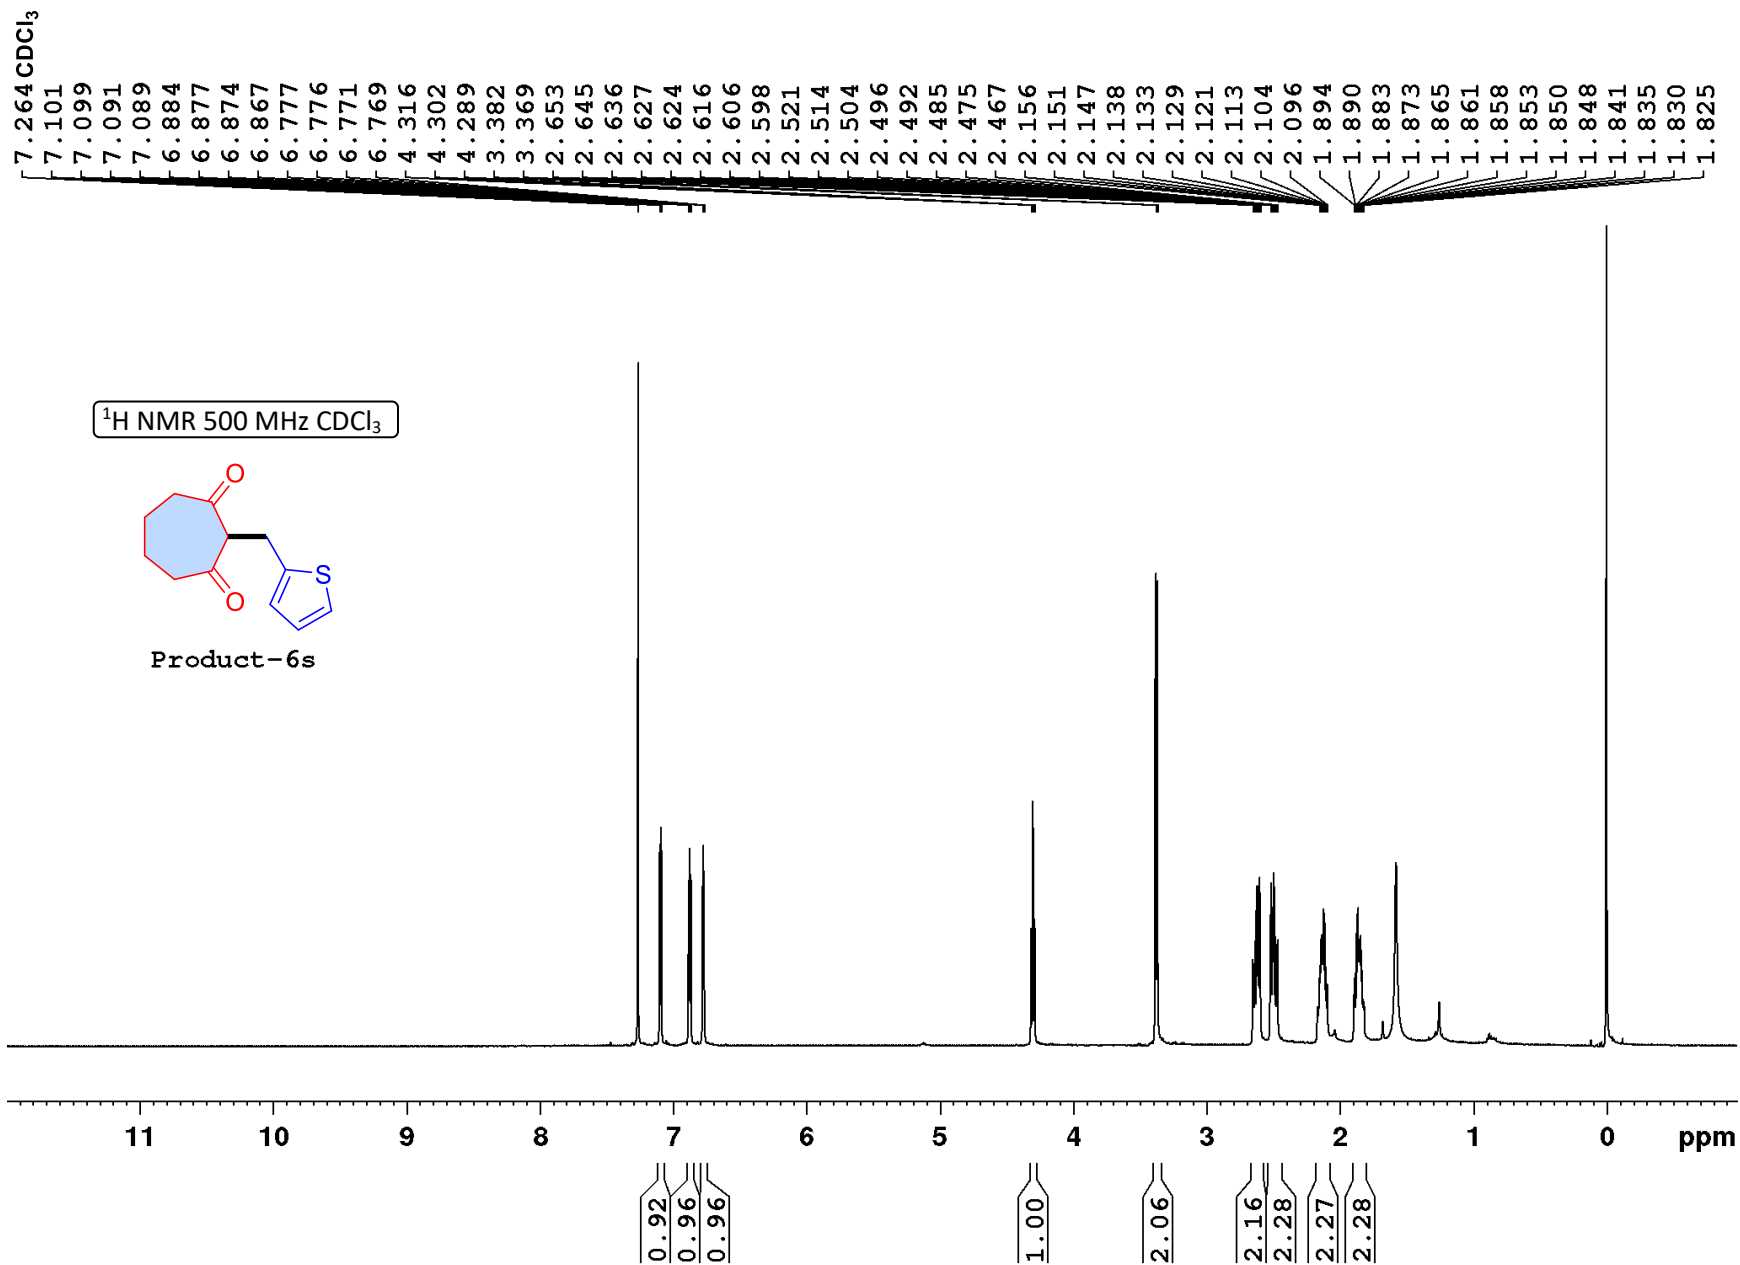

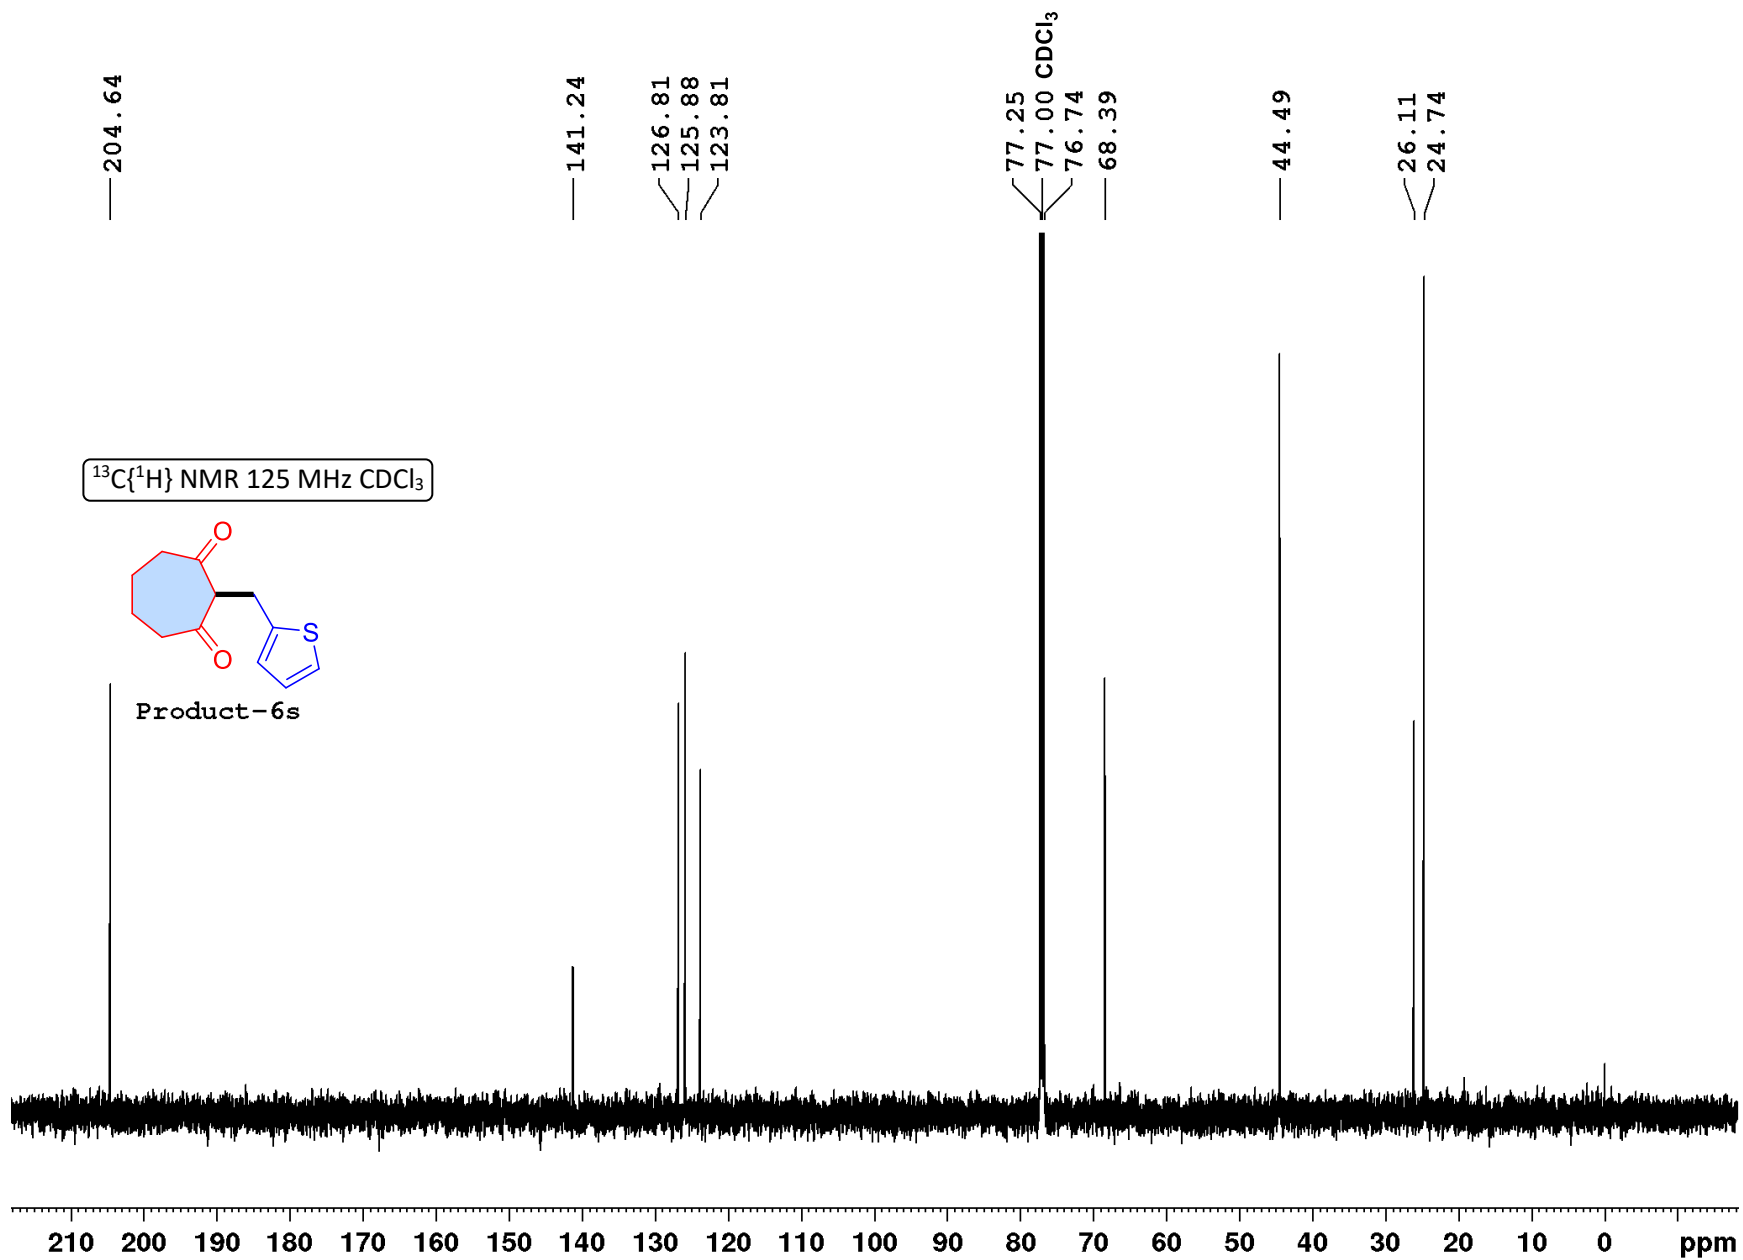

DEPT-135 125 MHz CDCl<sub>3</sub>

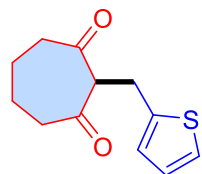

Product-6s

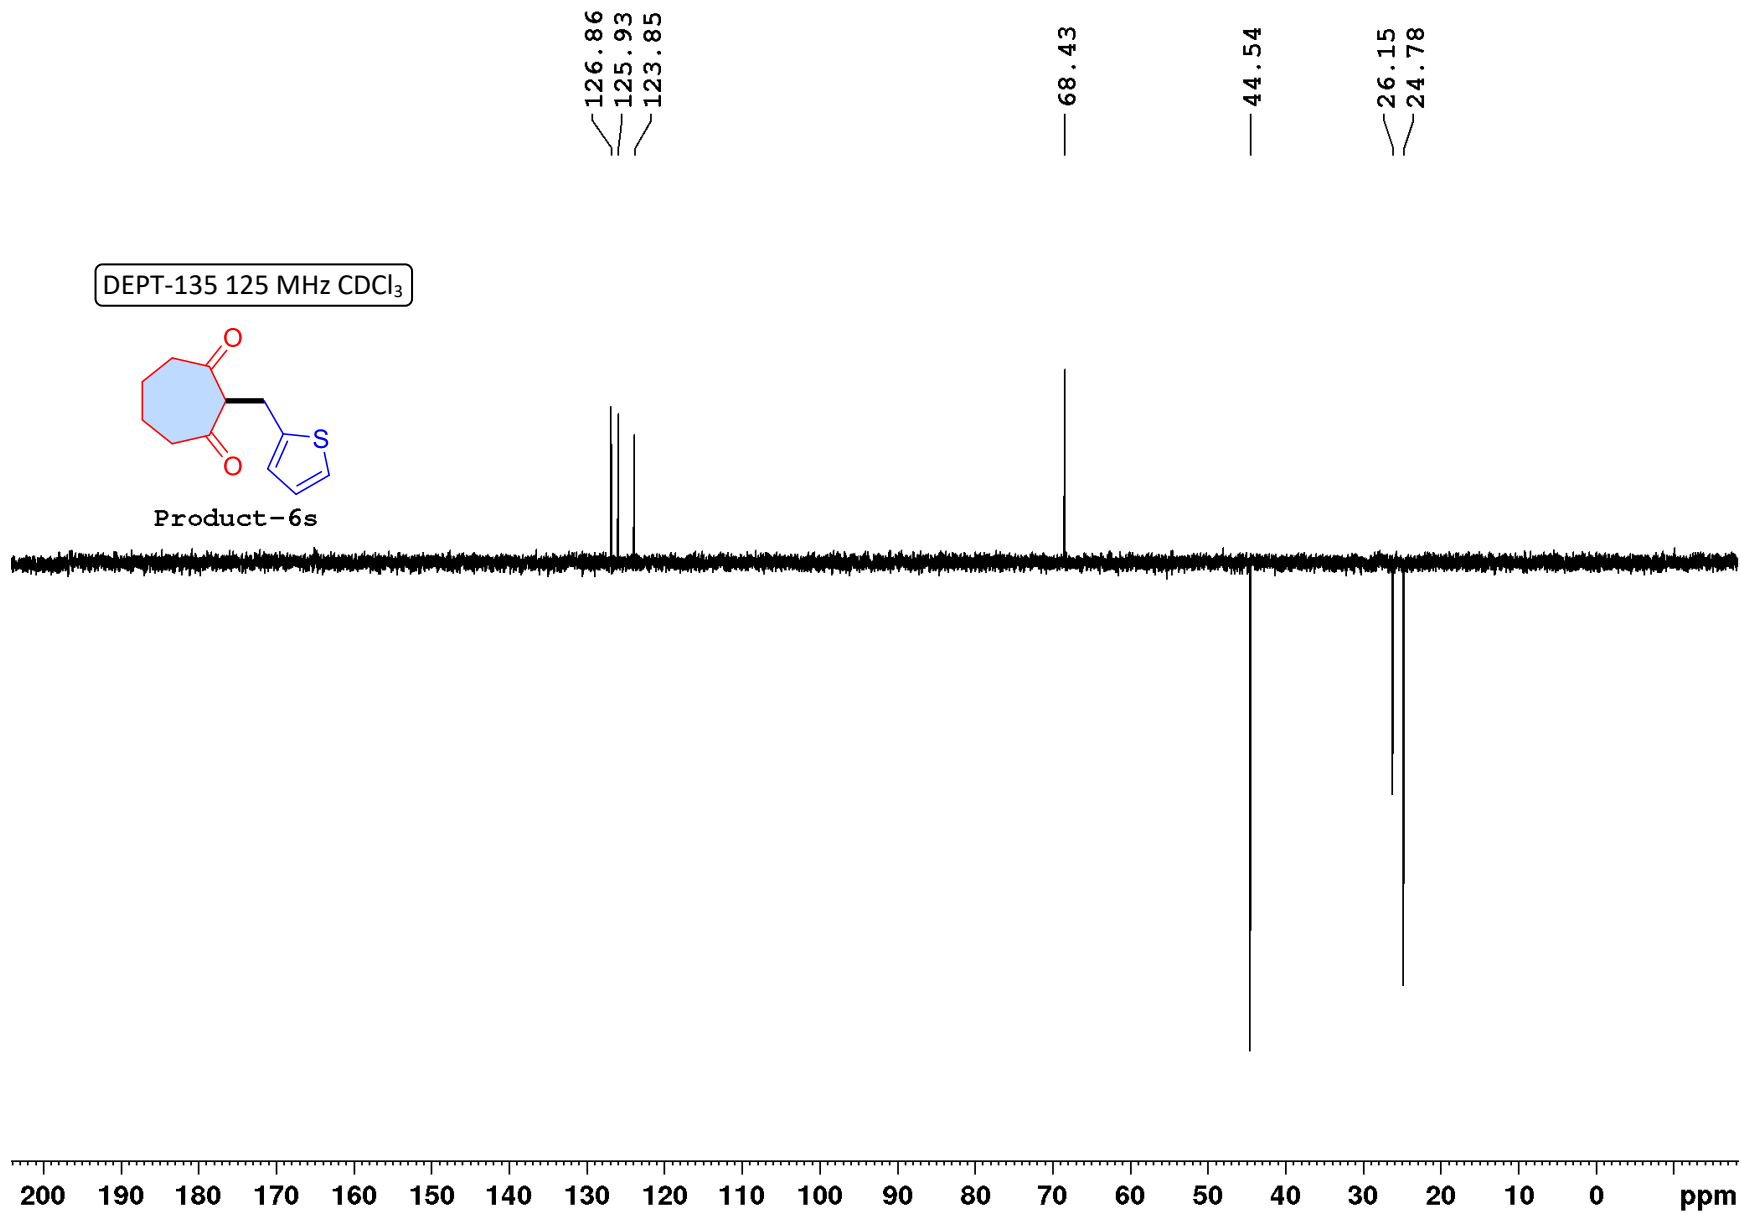



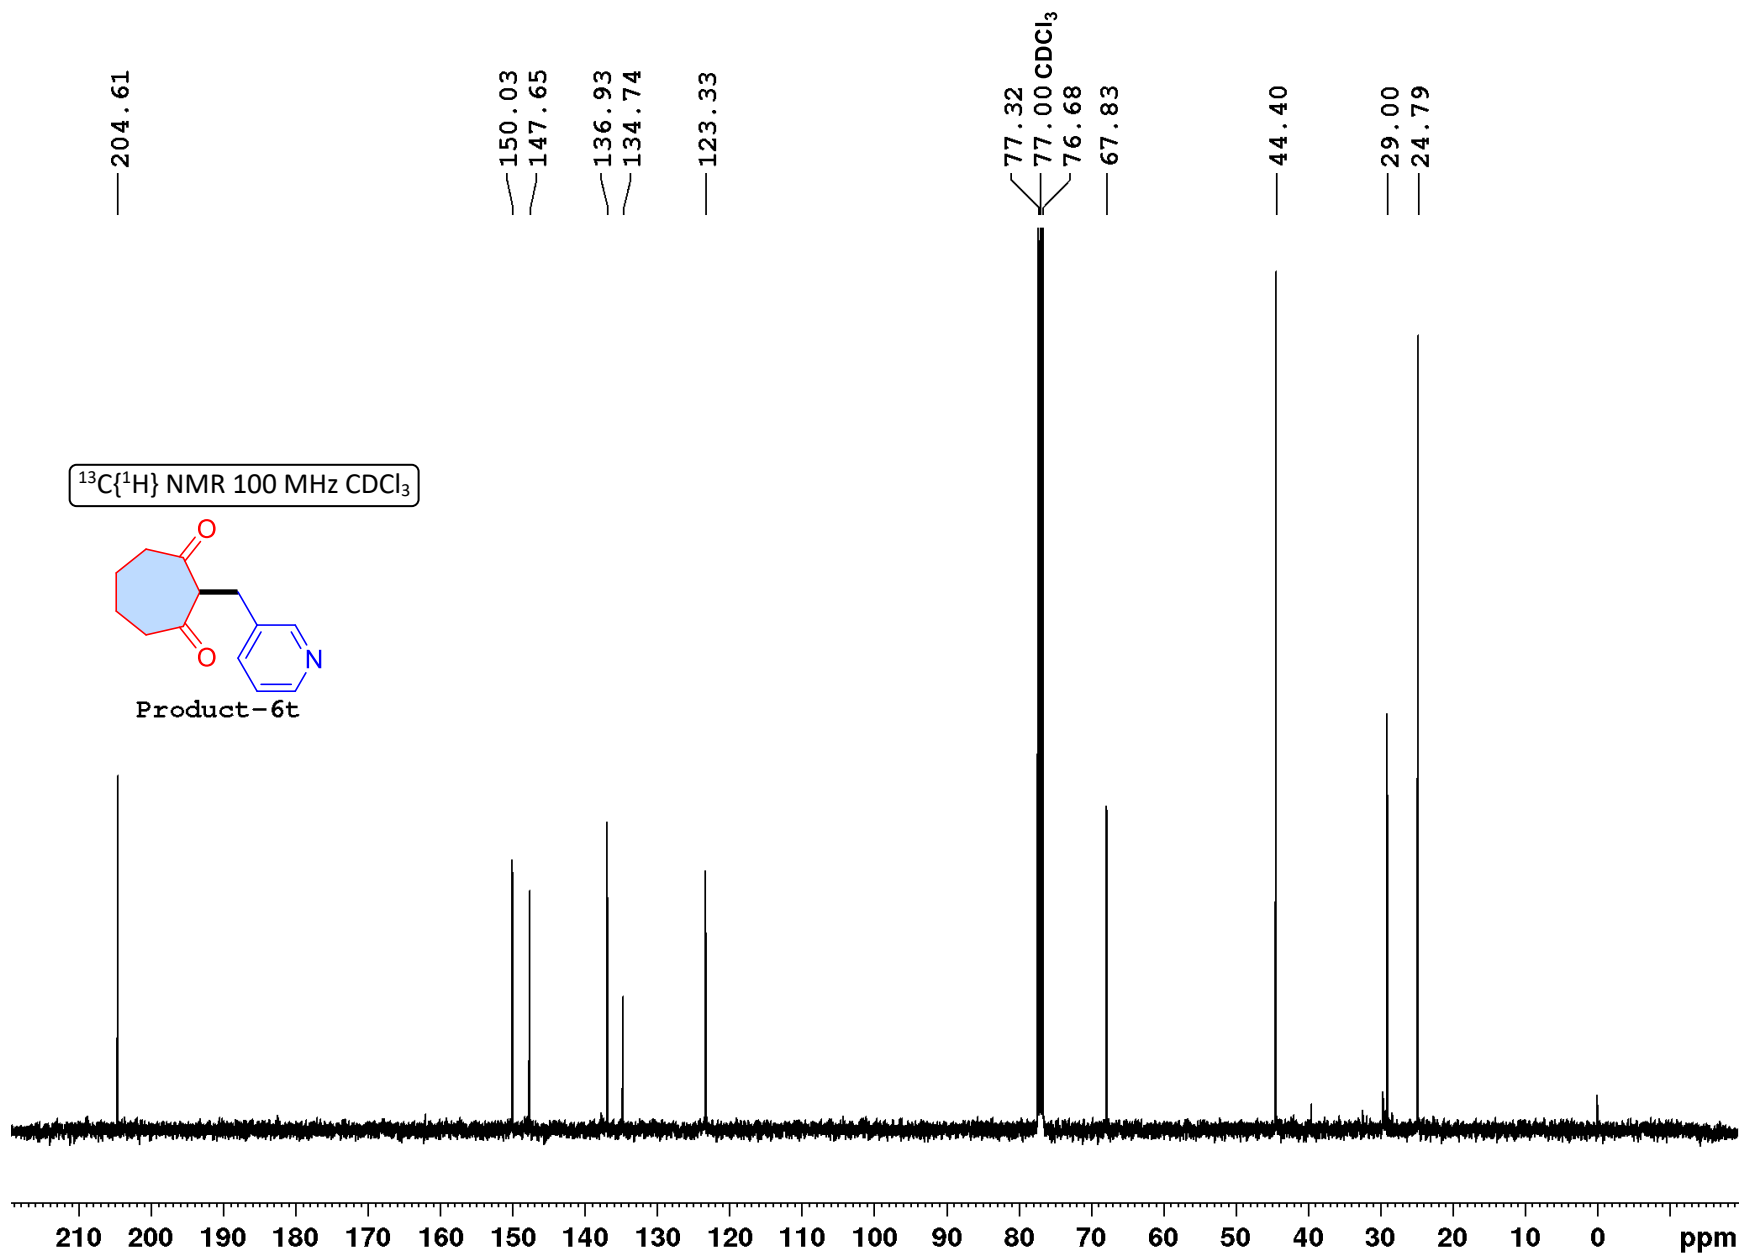

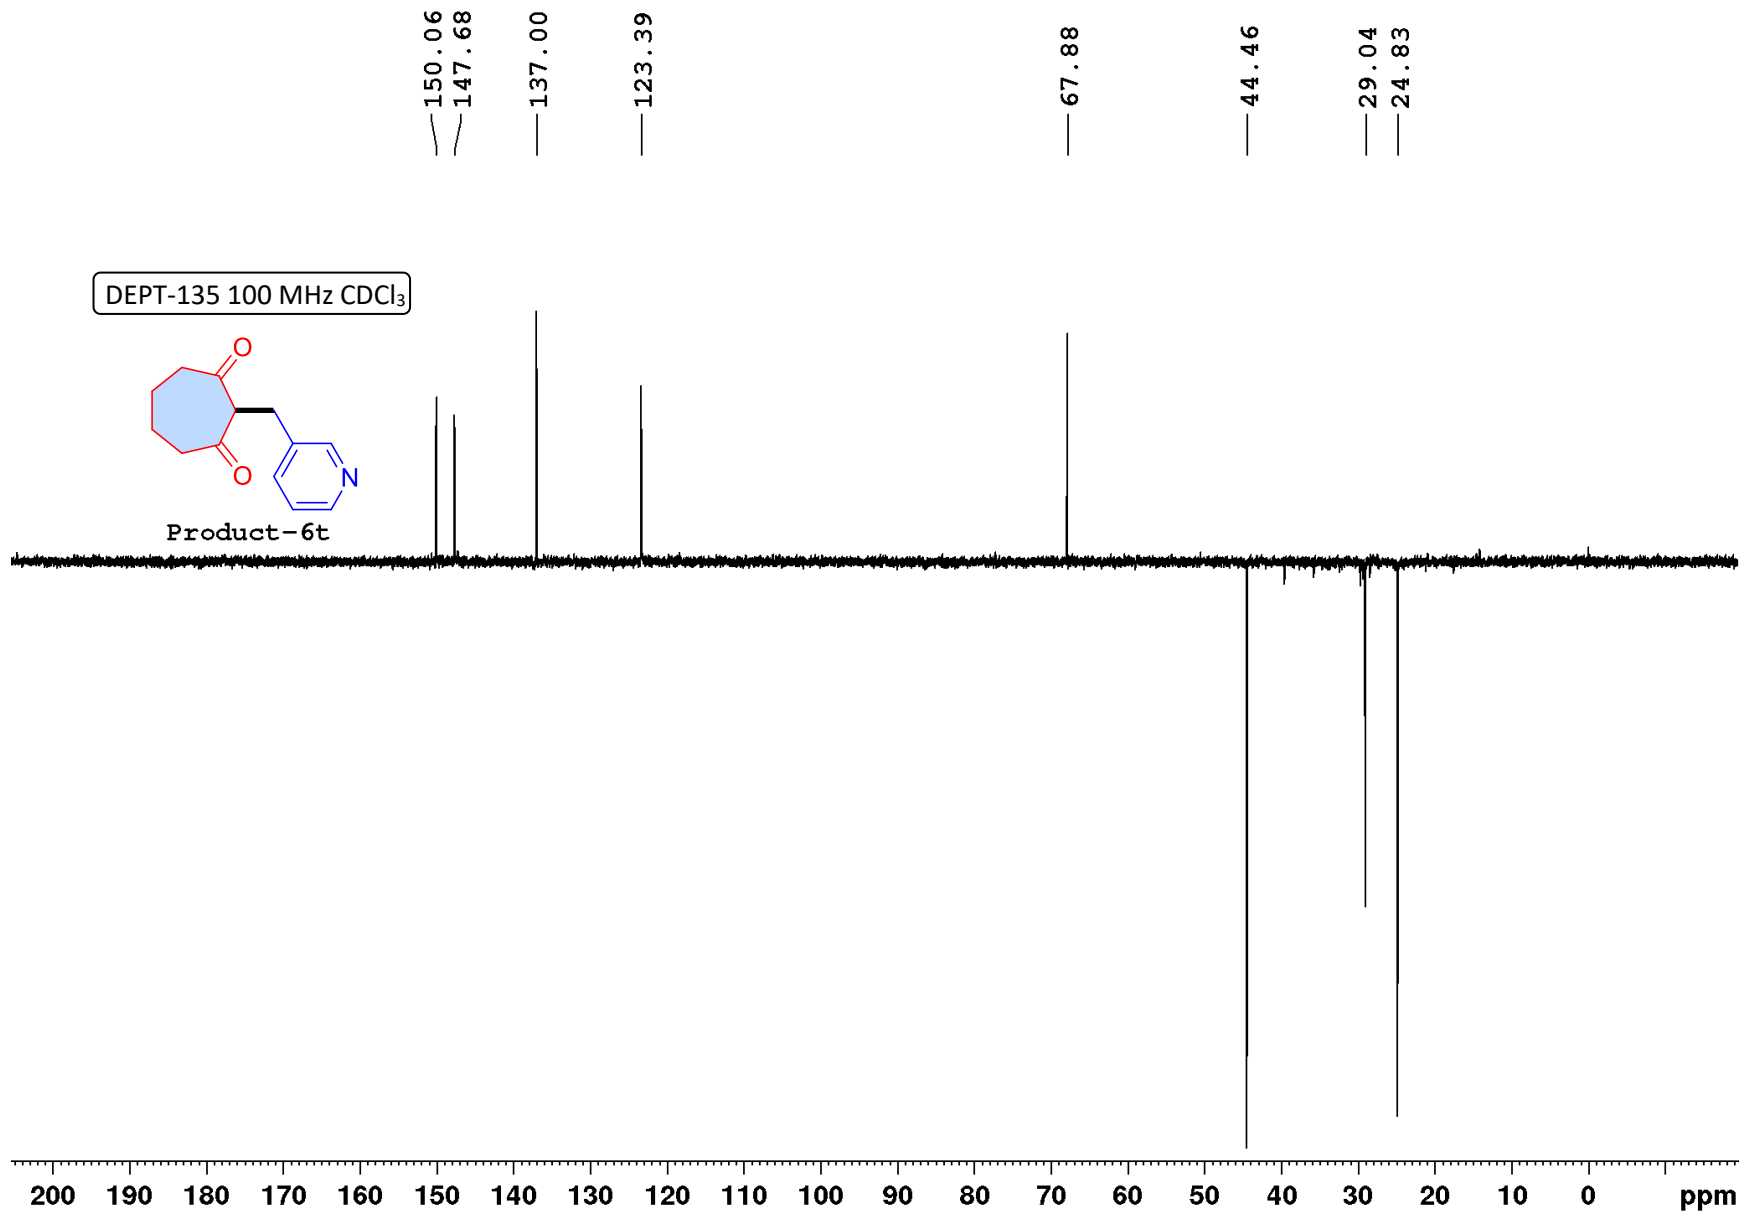

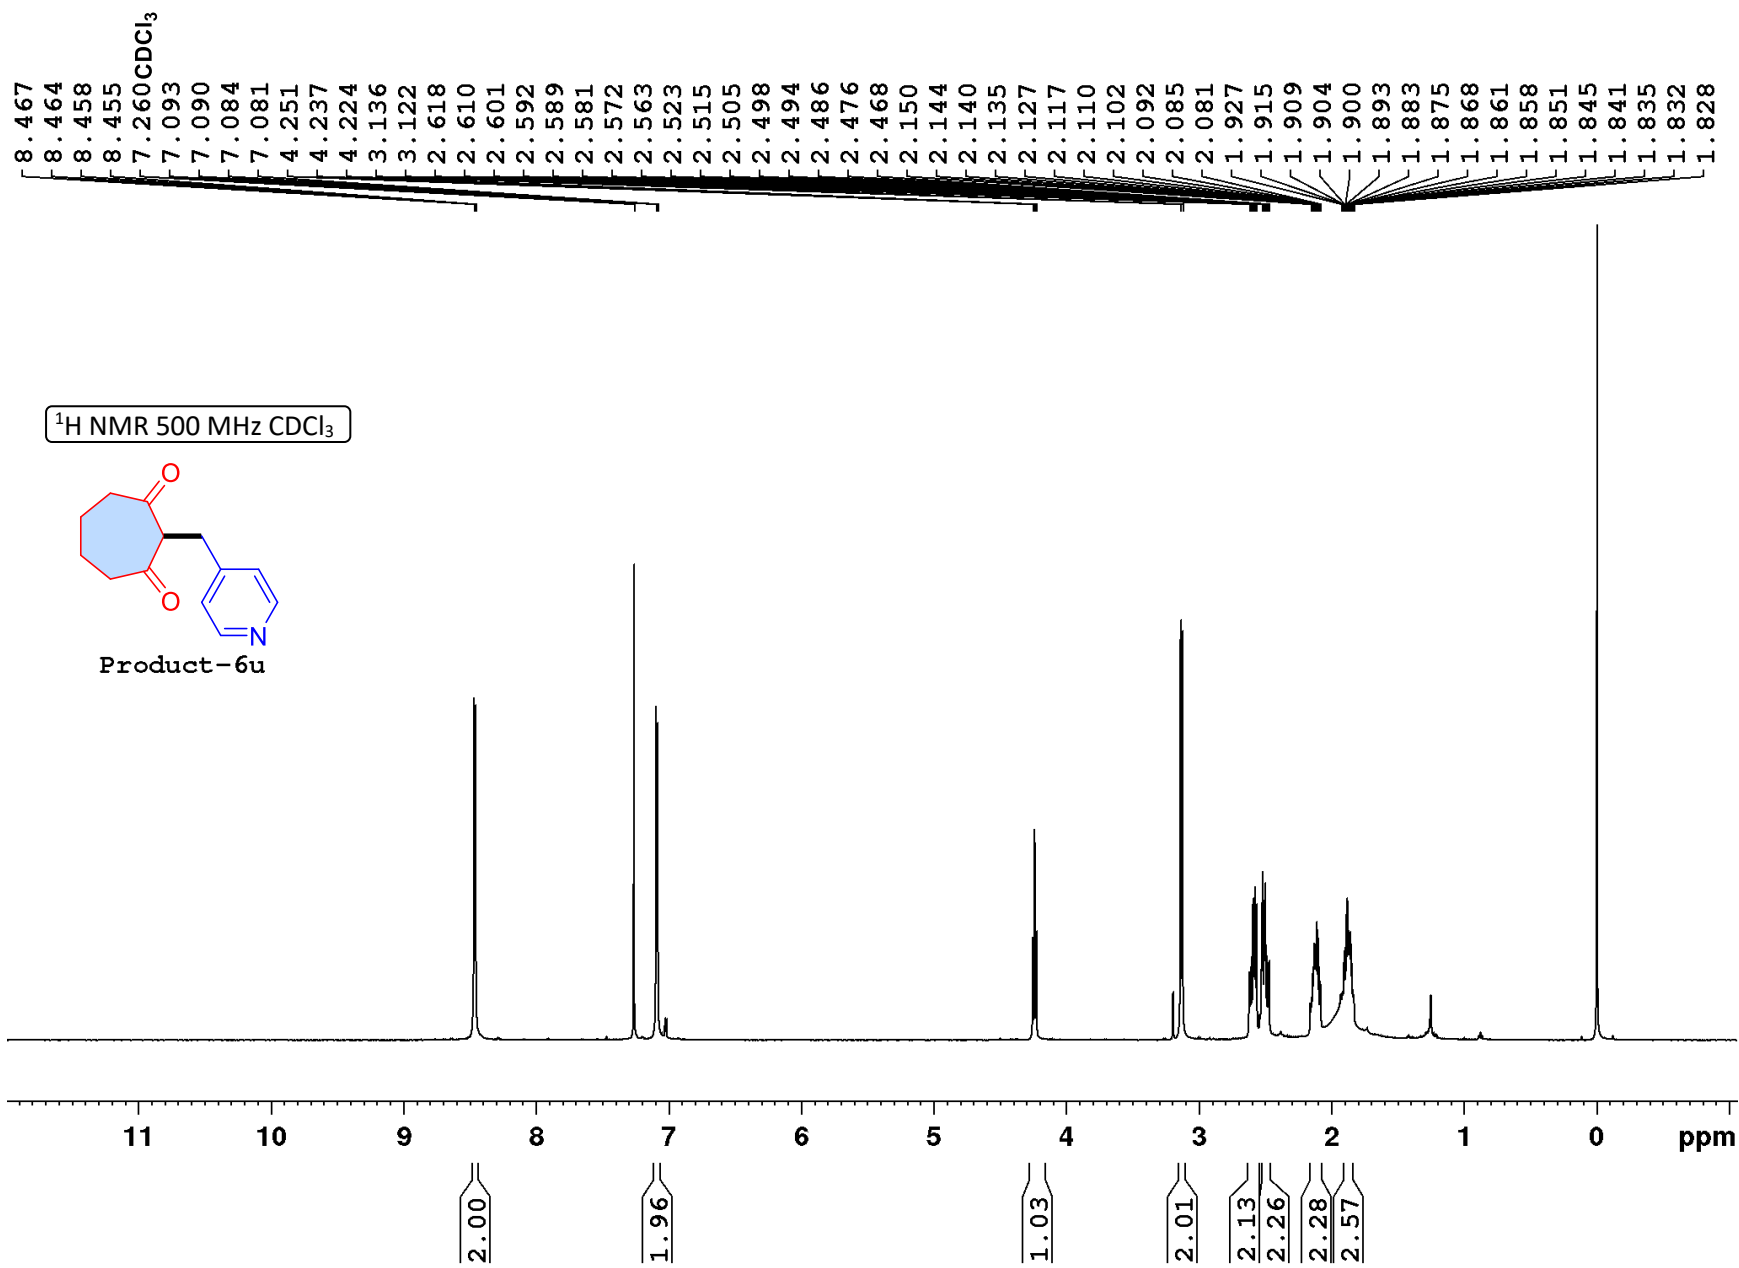



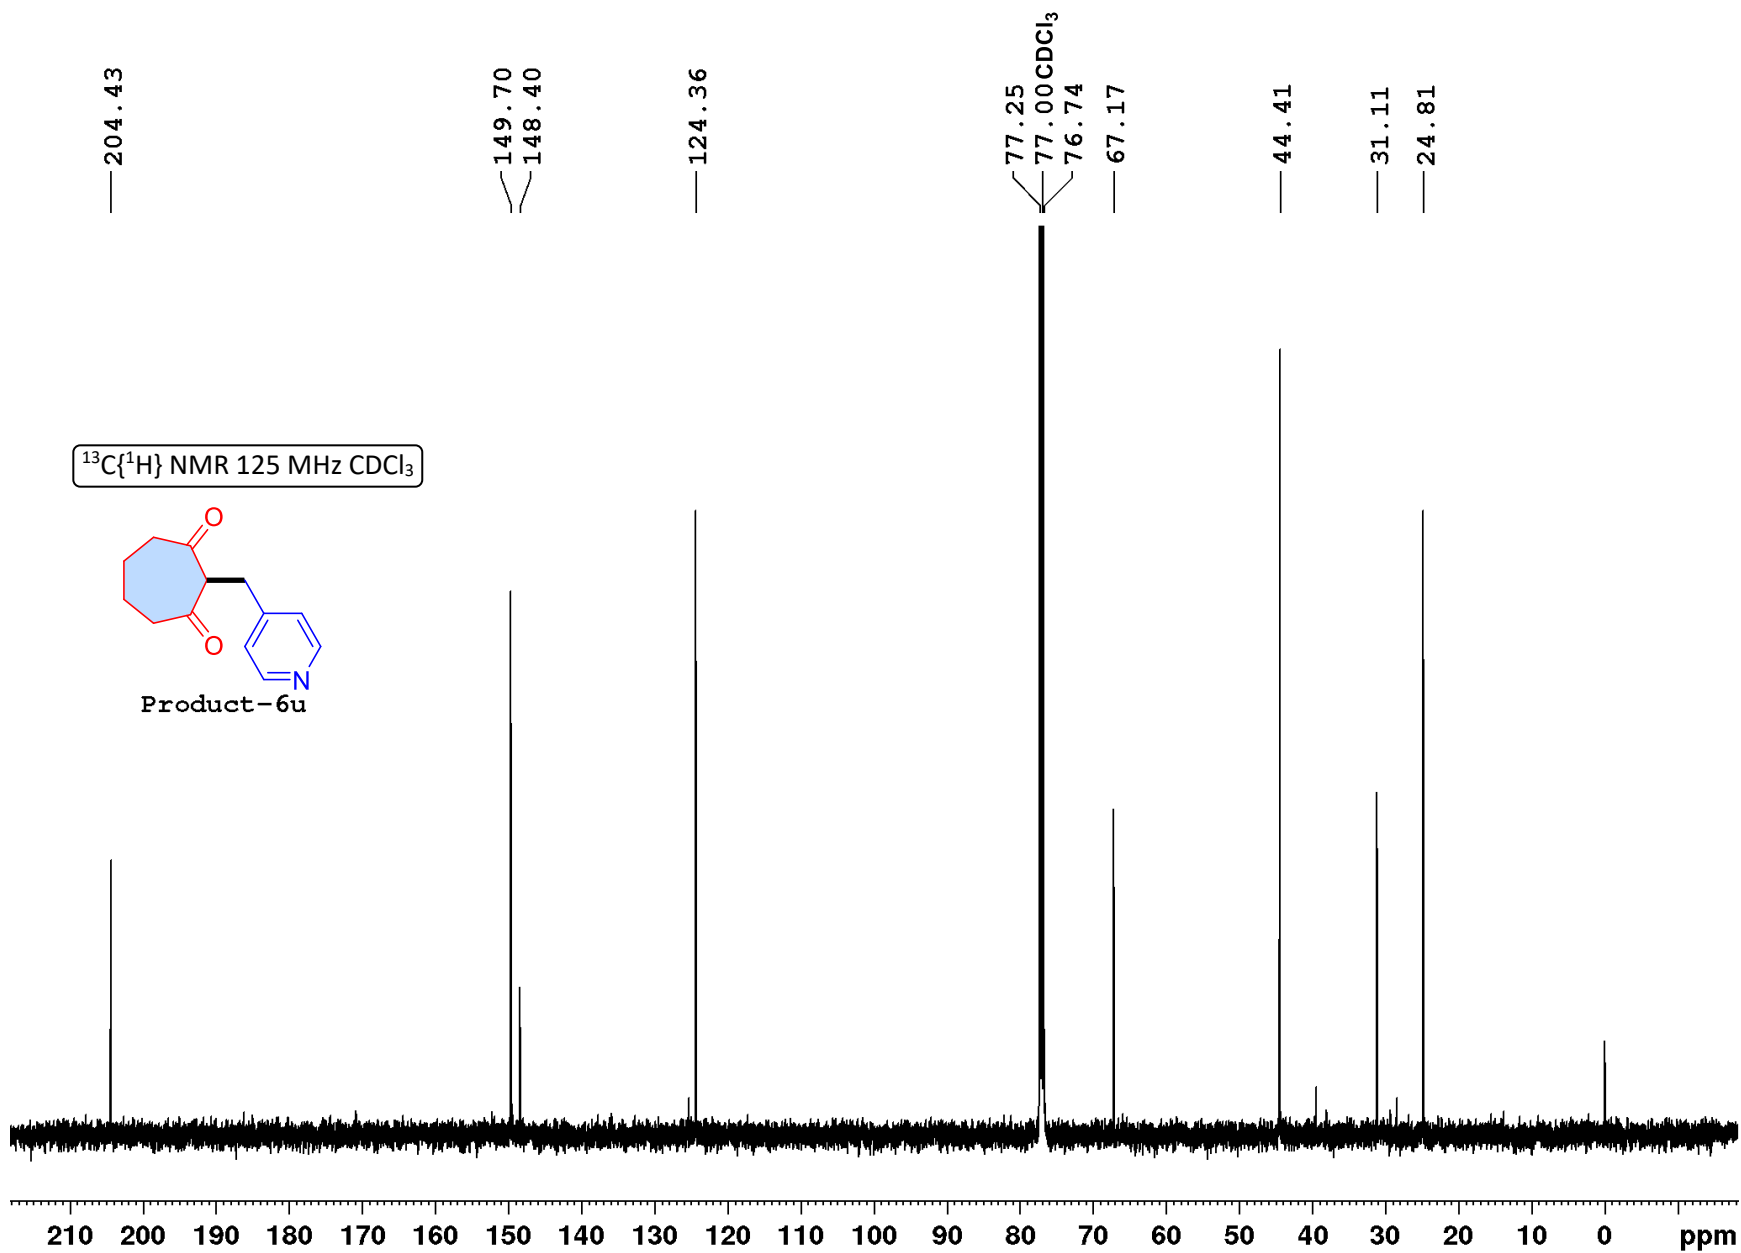

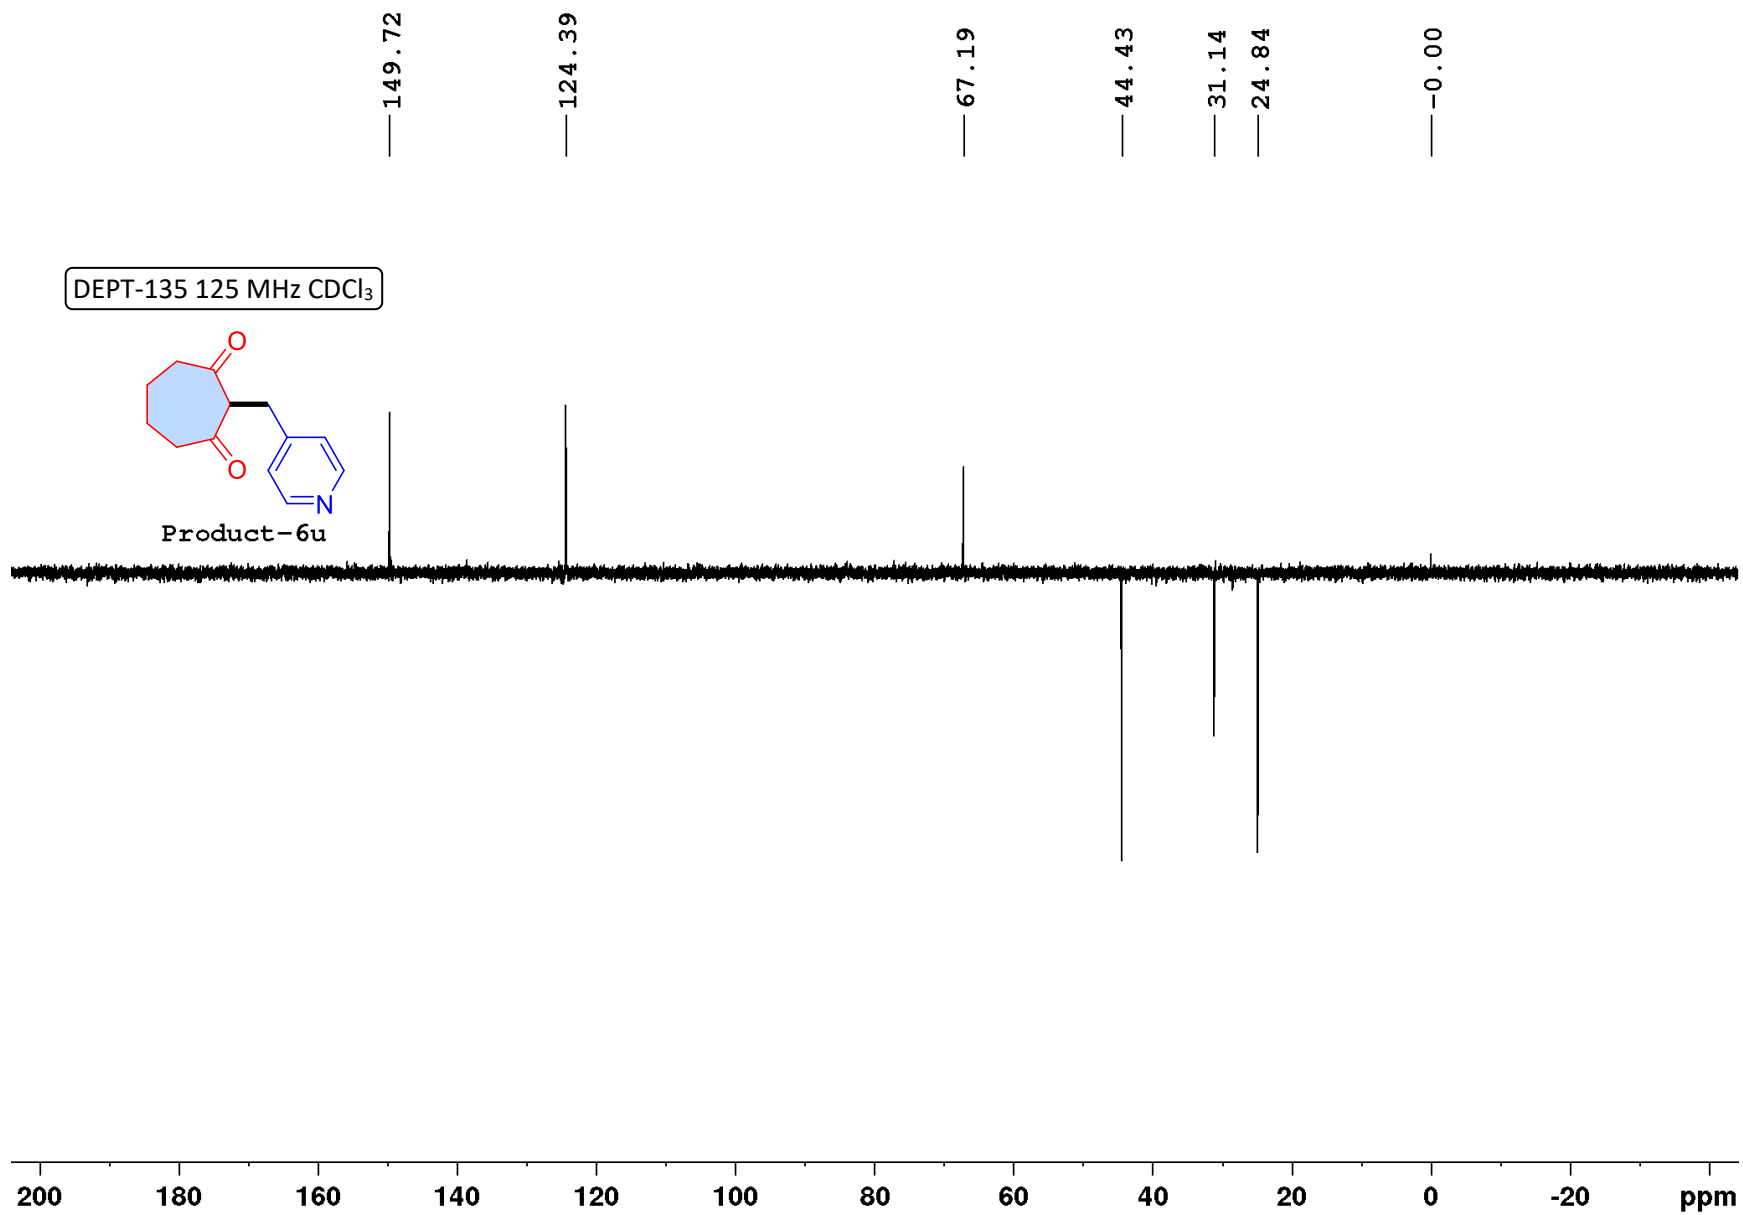

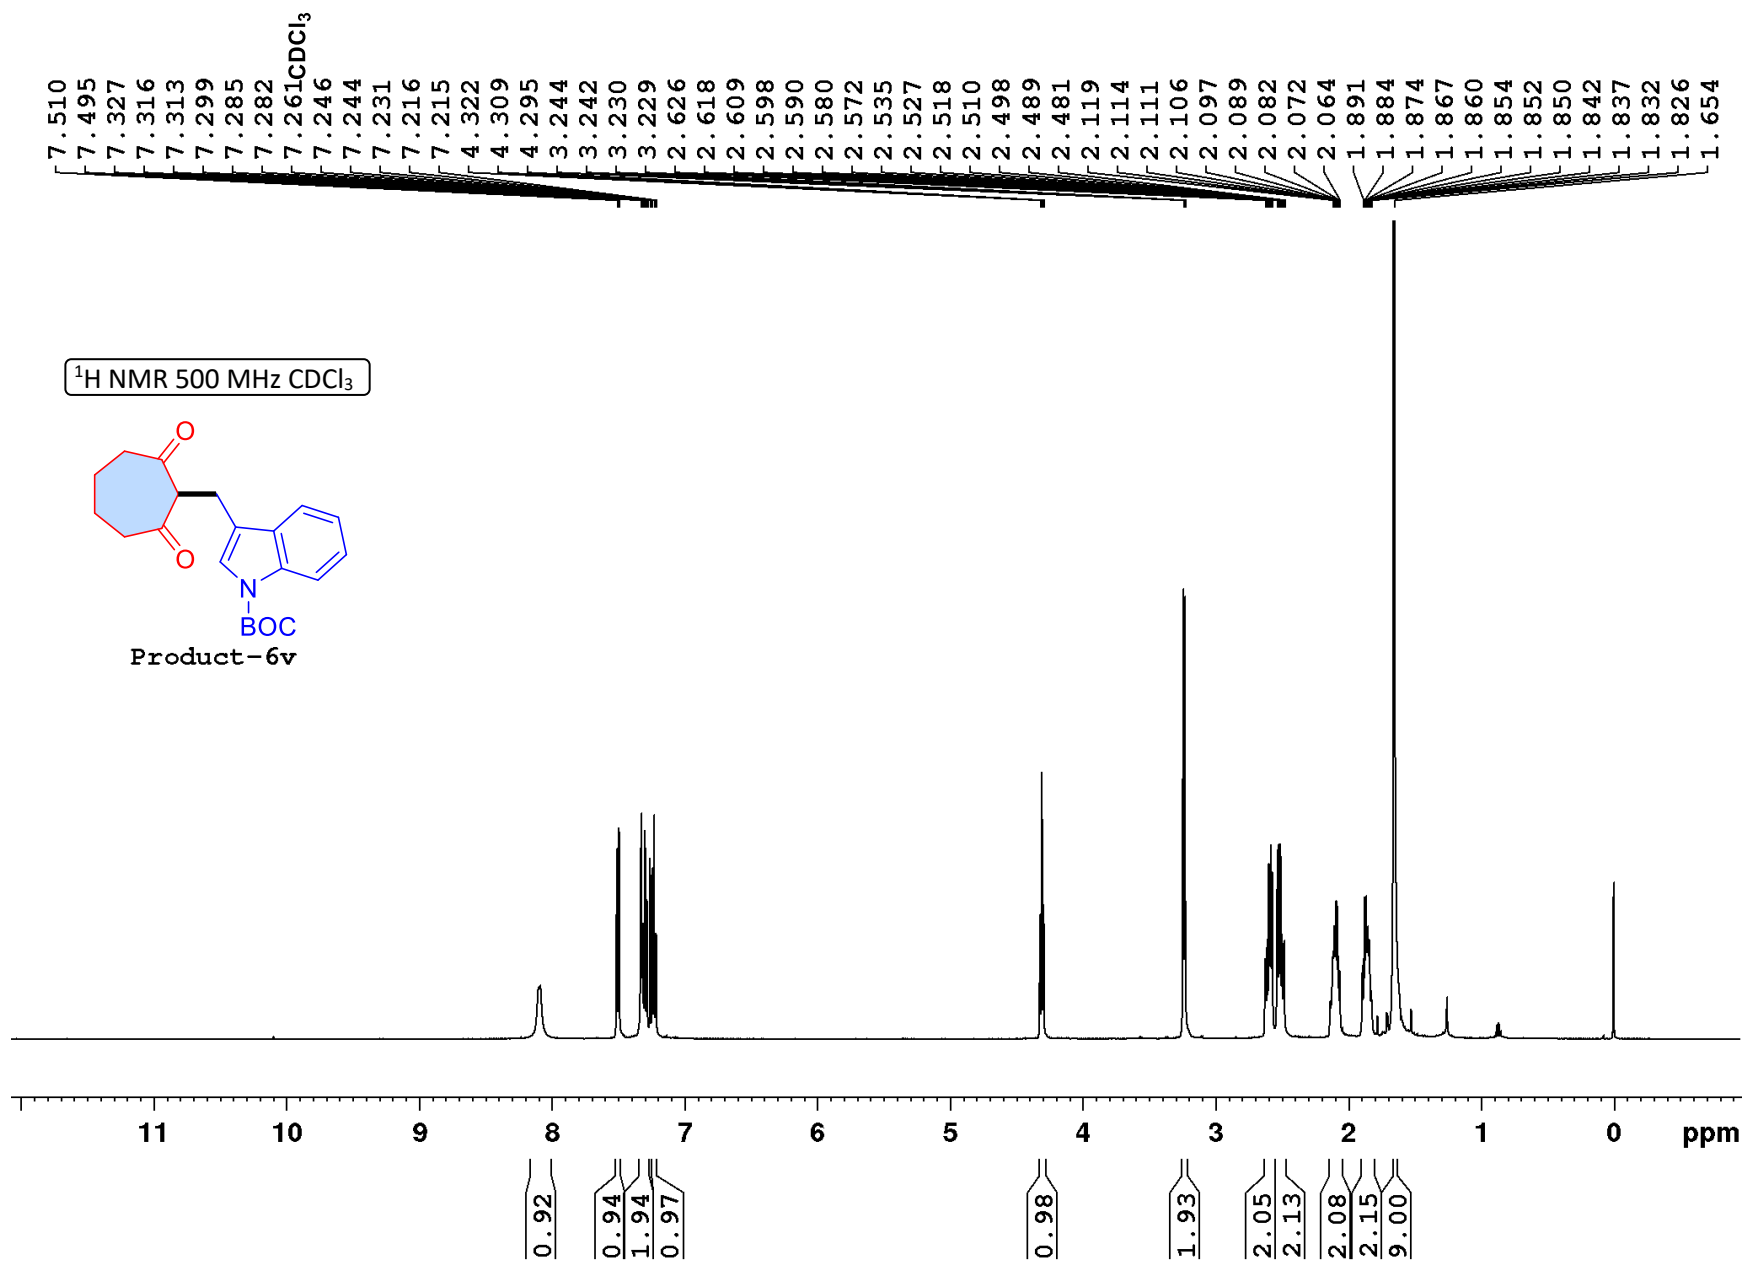

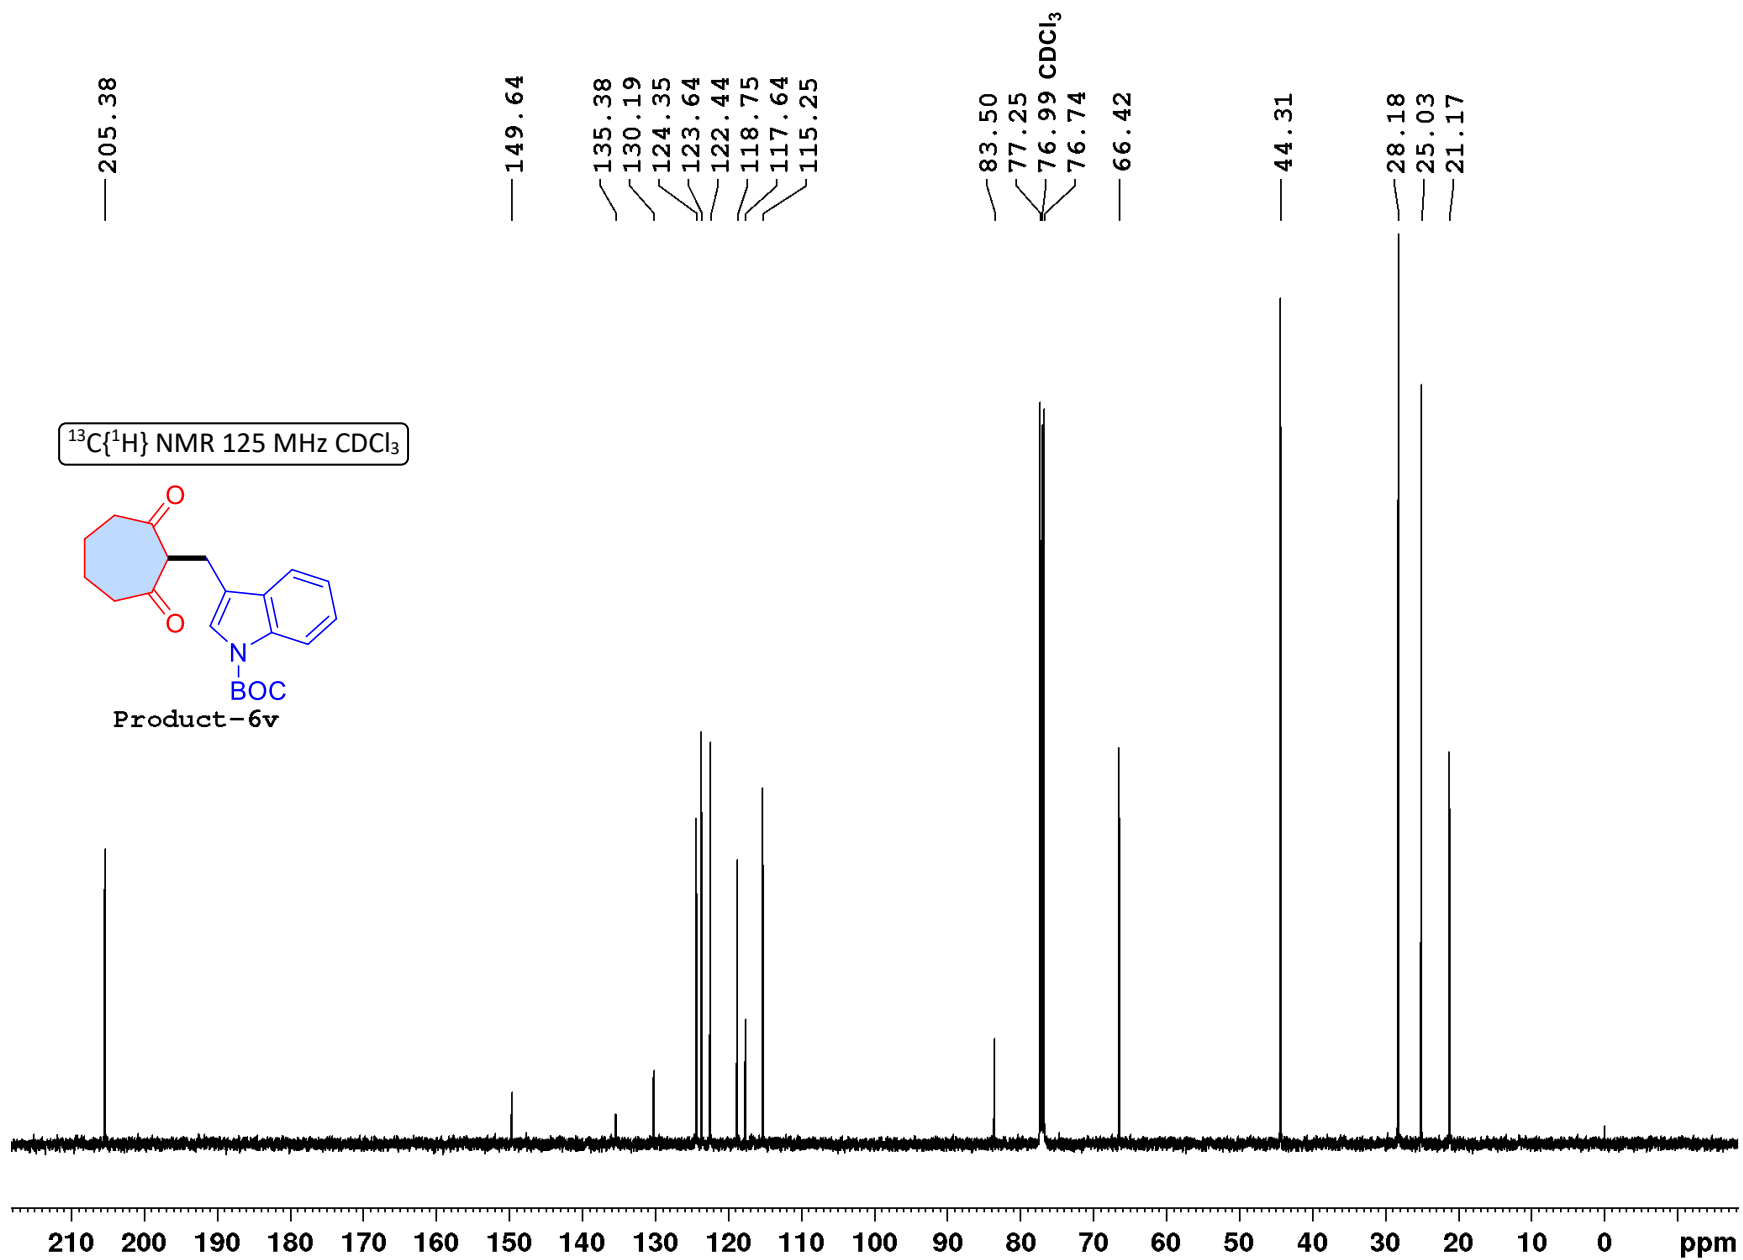

DEPT-135 125 MHz CDCl<sub>3</sub>

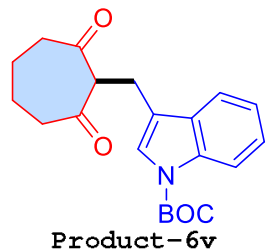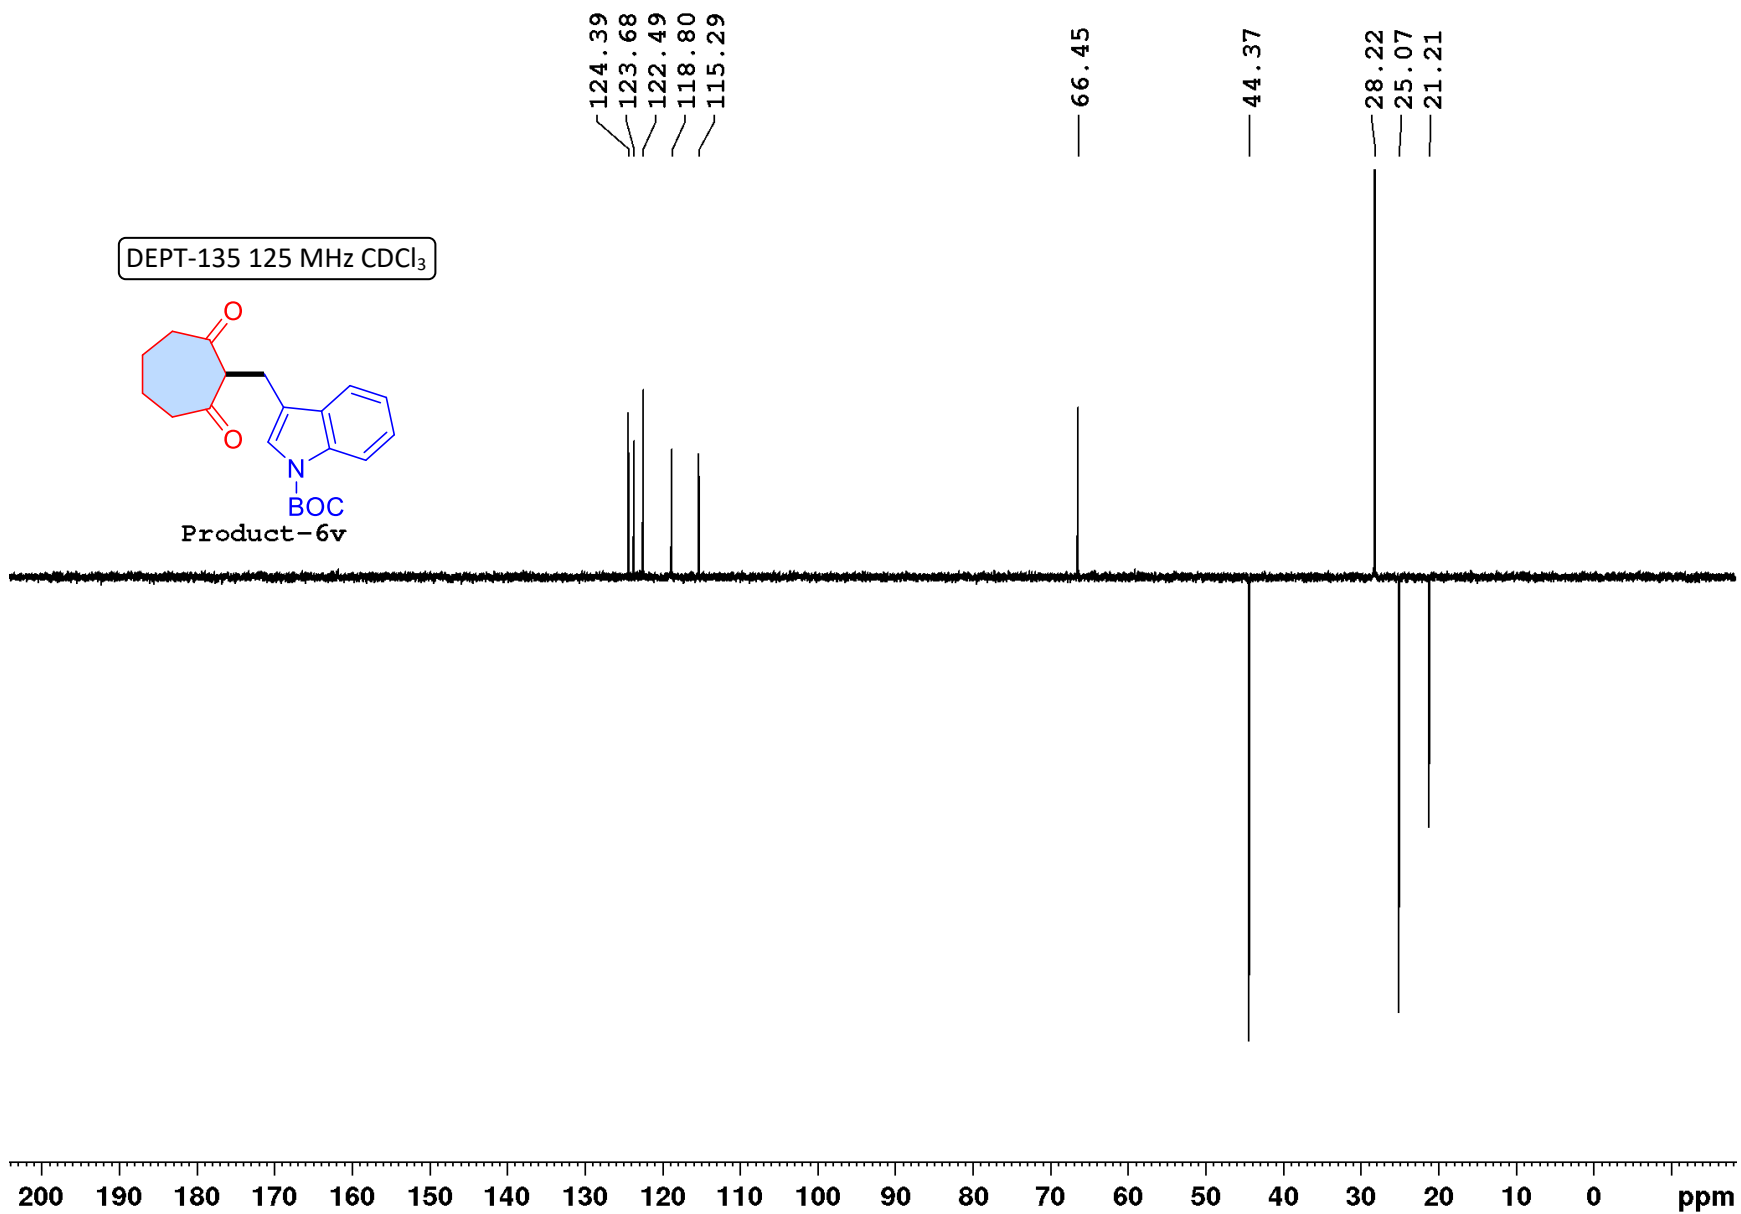

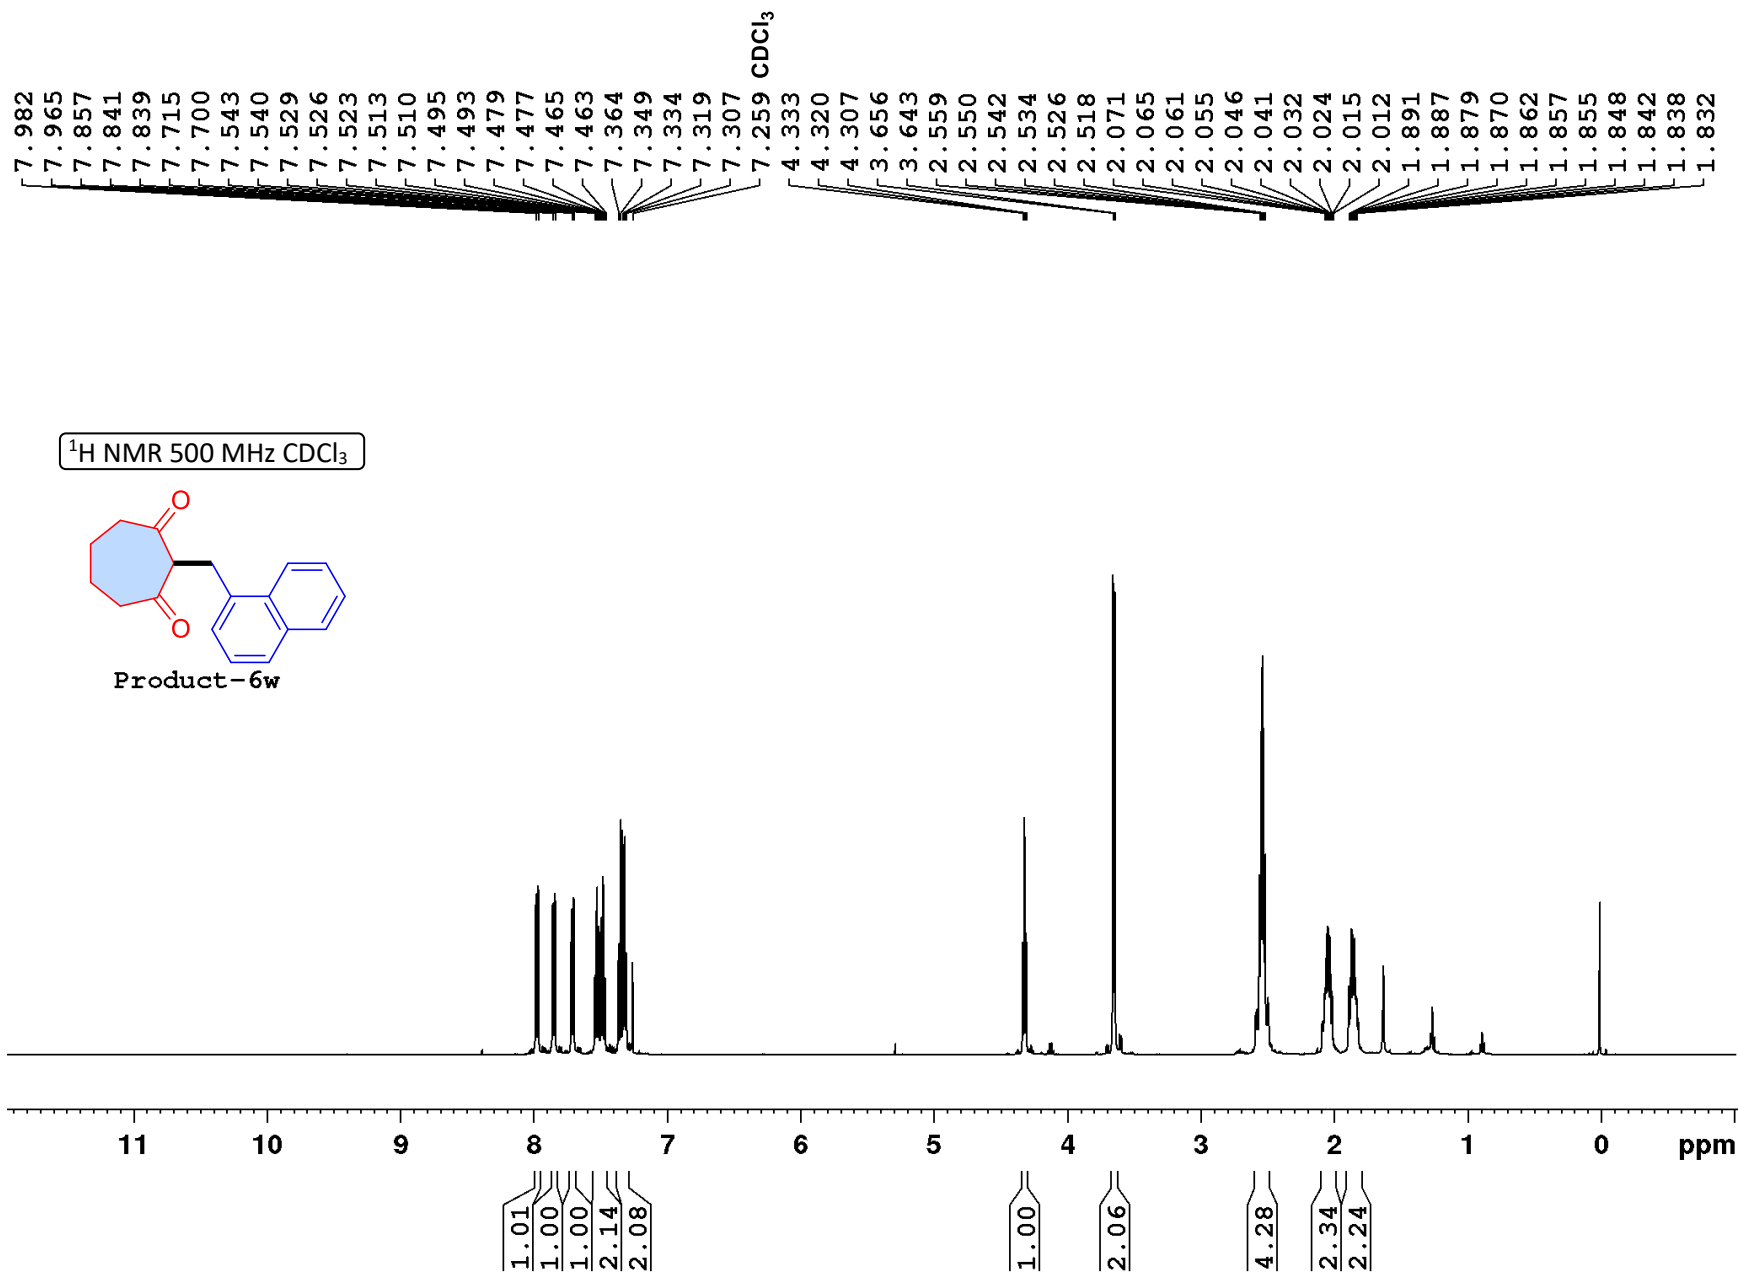

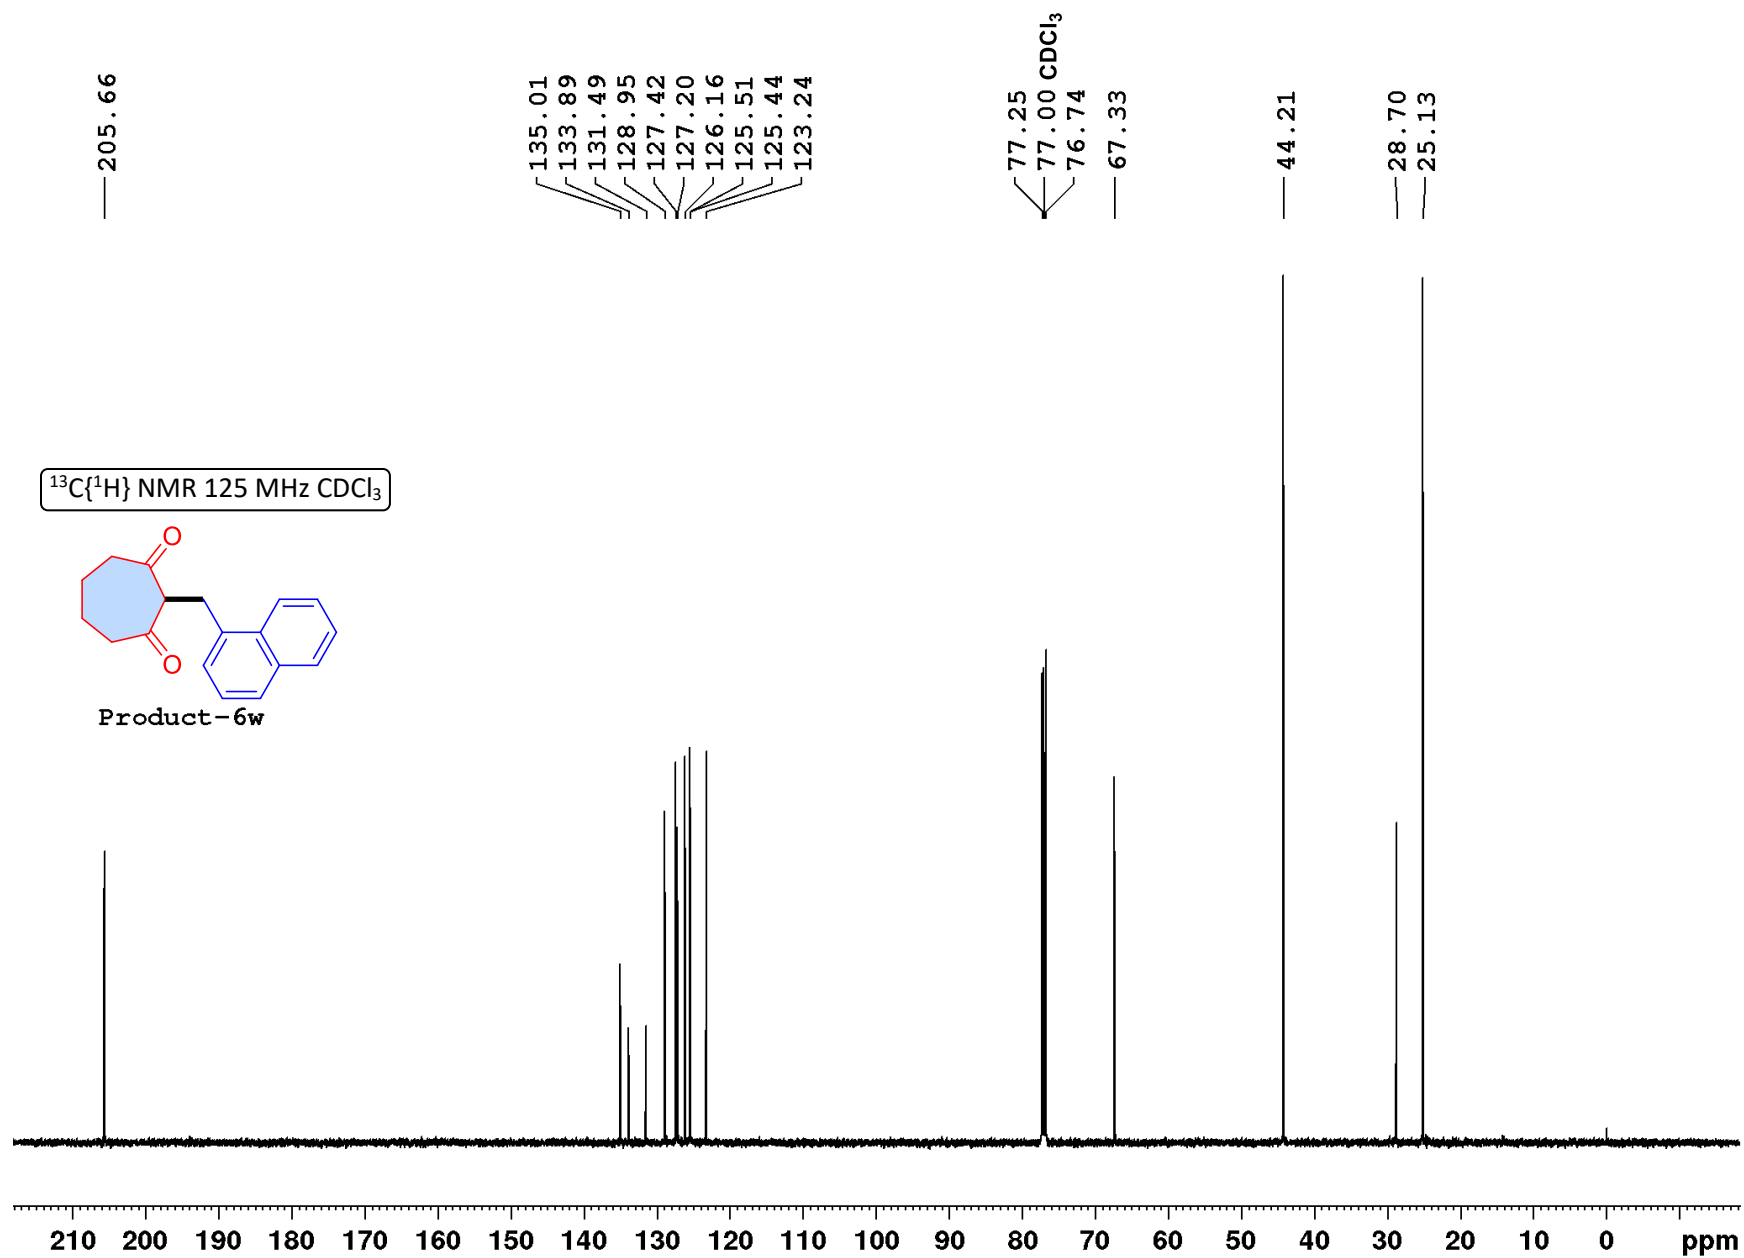

DEPT-135 125 MHz CDCl<sub>3</sub>

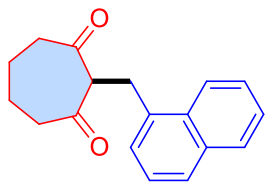

Product-6w

129.02  
127.49  
127.26  
126.22  
125.58  
125.51  
123.31

67.39

44.27

28.76  
25.19

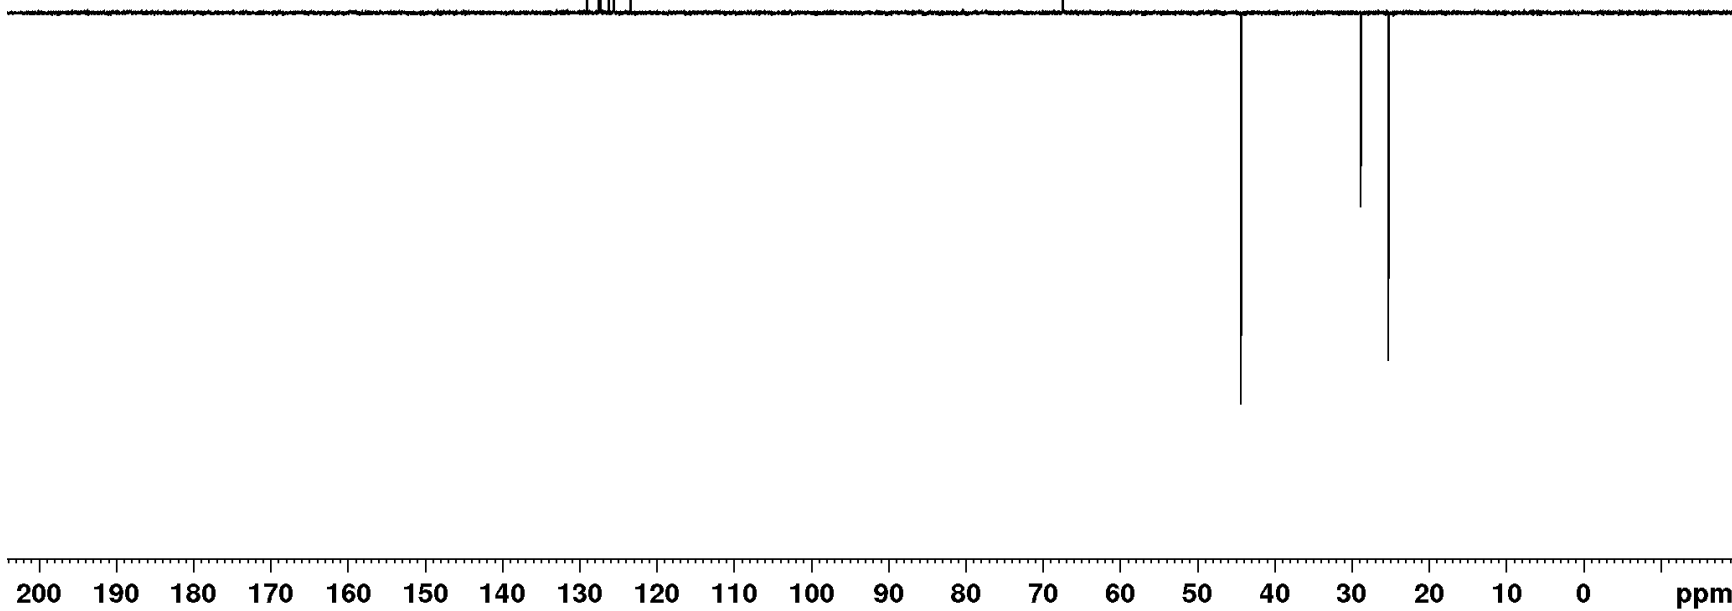



7.789  
7.774  
7.770  
7.767  
7.751  
7.747  
7.729  
7.605  
7.458  
7.447  
7.444  
7.433  
7.429  
7.418  
7.415  
7.404  
7.297  
7.294  
7.280  
7.277  
7.260 CDCl<sub>3</sub>  
4.332  
4.318  
4.305  
3.326  
3.312  
2.586  
2.578  
2.569  
2.557  
2.549  
2.540  
2.532  
2.502  
2.495  
2.485  
2.477  
2.466  
2.456  
2.449  
2.110  
2.104  
2.096  
2.088  
2.085  
2.080  
2.073  
2.064  
1.870  
1.860  
1.853  
1.849  
1.846  
1.838  
1.835  
1.831  
1.828  
1.823

<sup>1</sup>H NMR 500 MHz CDCl<sub>3</sub>

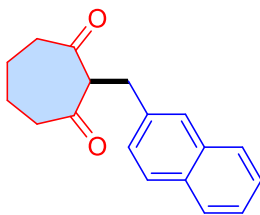

Product-6x

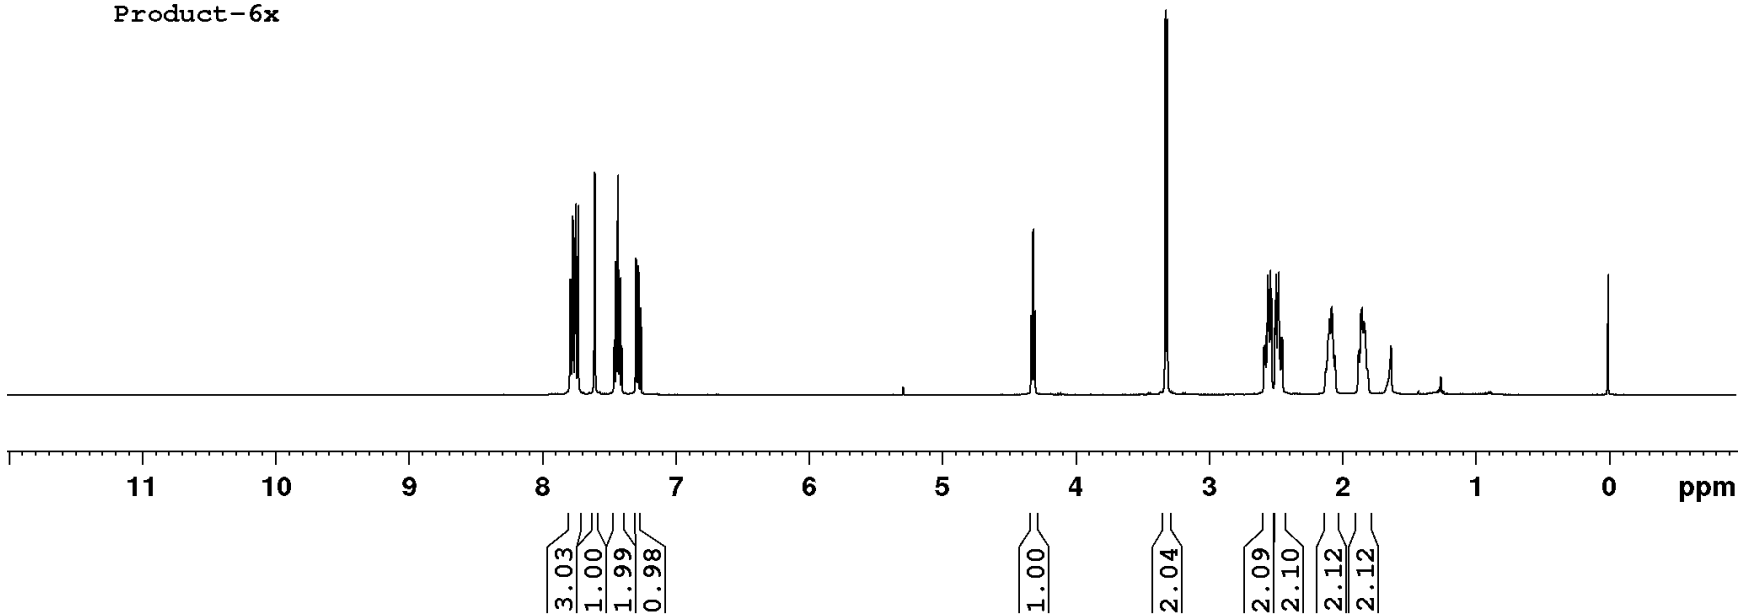

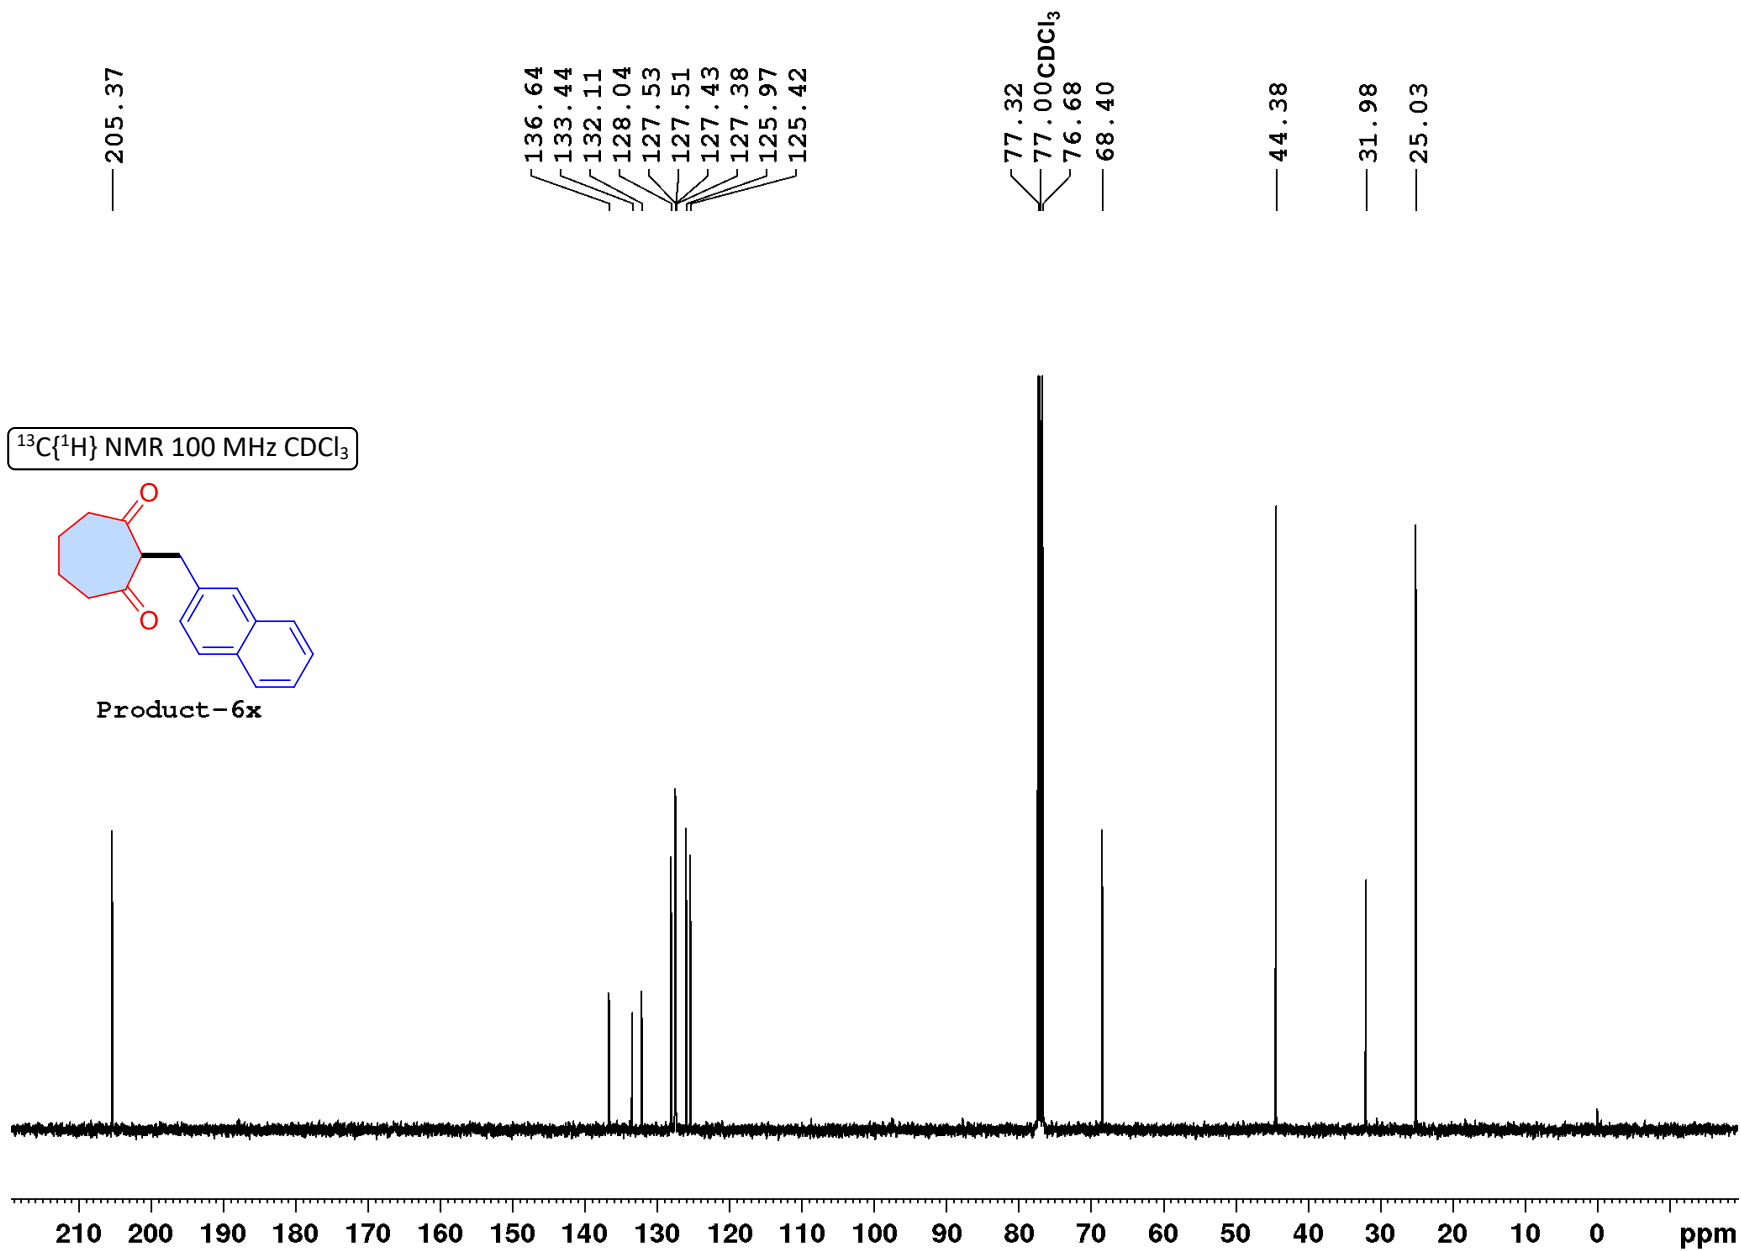

DEPT-135 100 MHz CDCl<sub>3</sub>

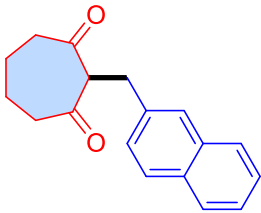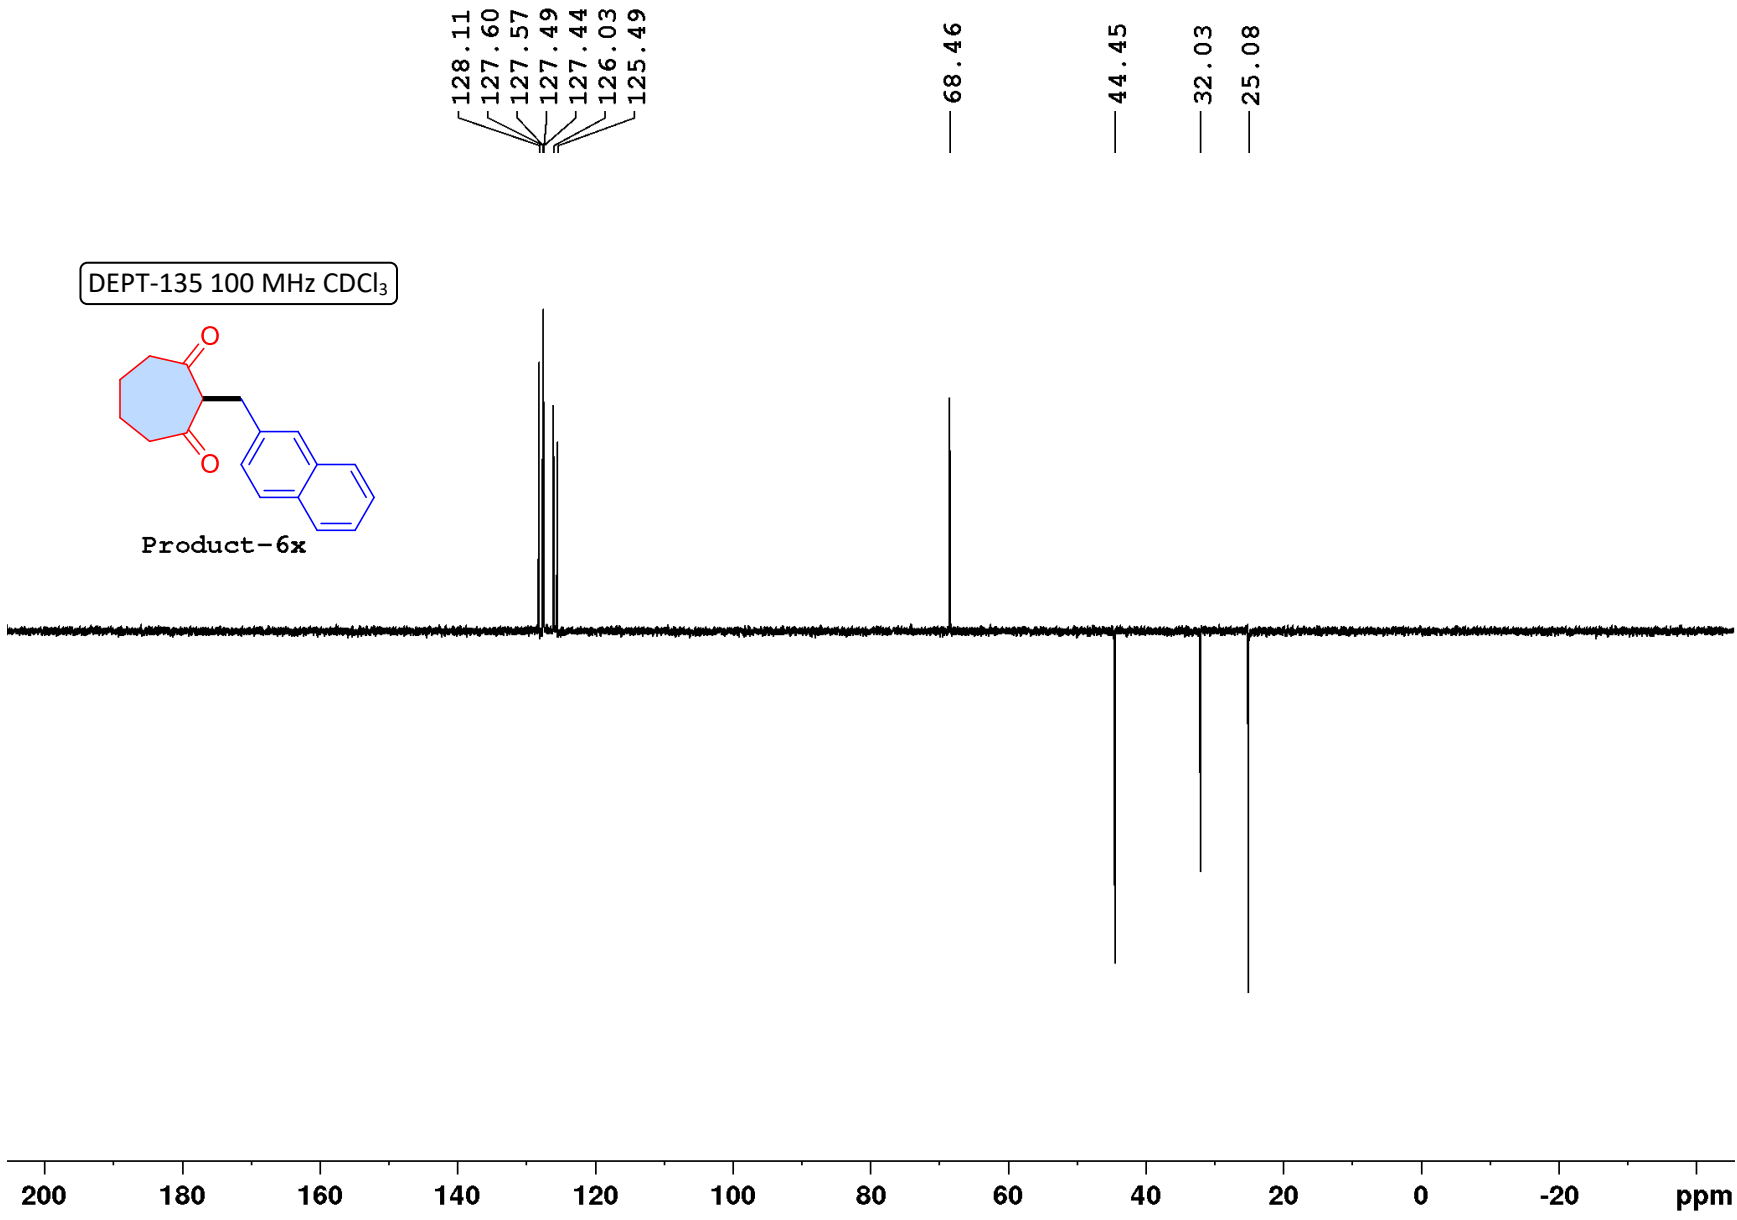

$^1\text{H}$  NMR 500 MHz  $\text{CDCl}_3$

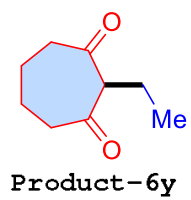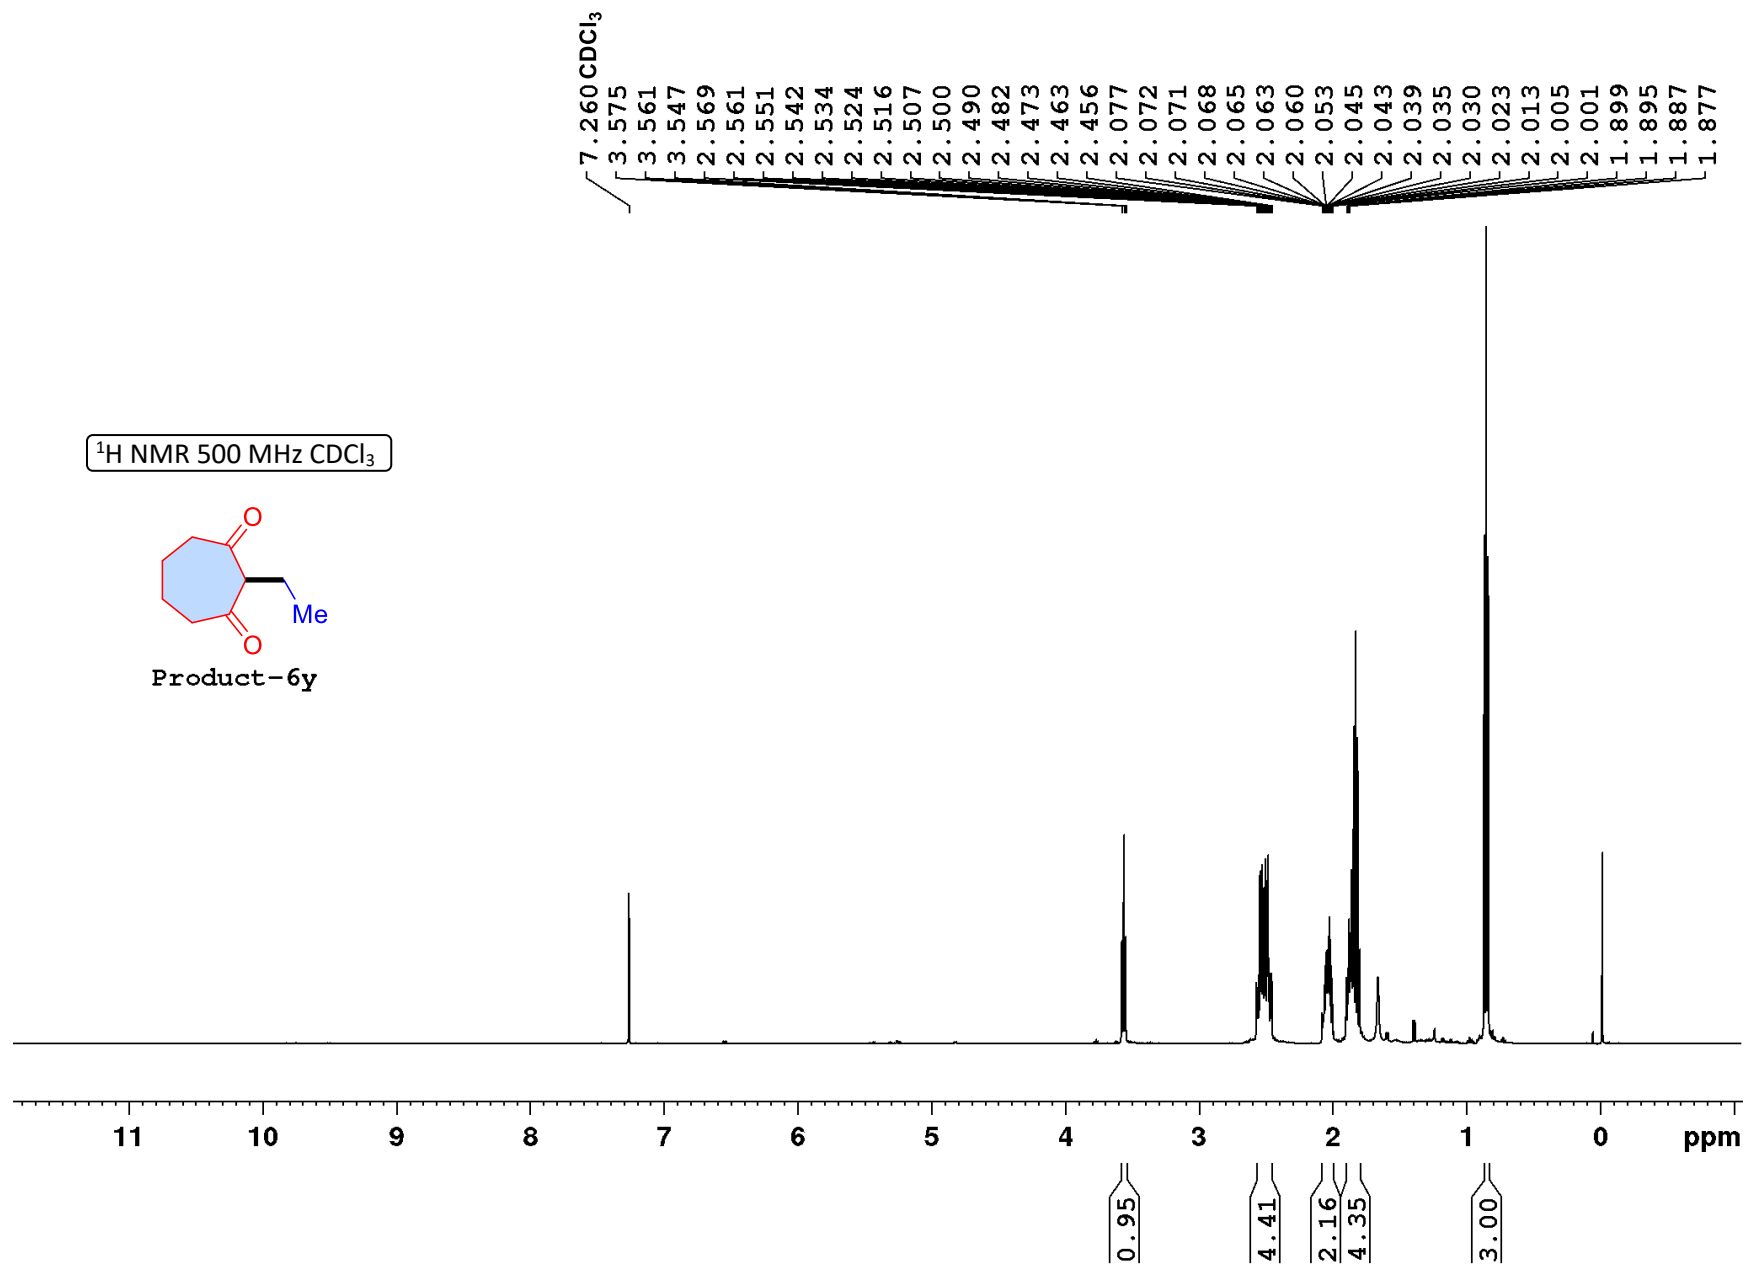

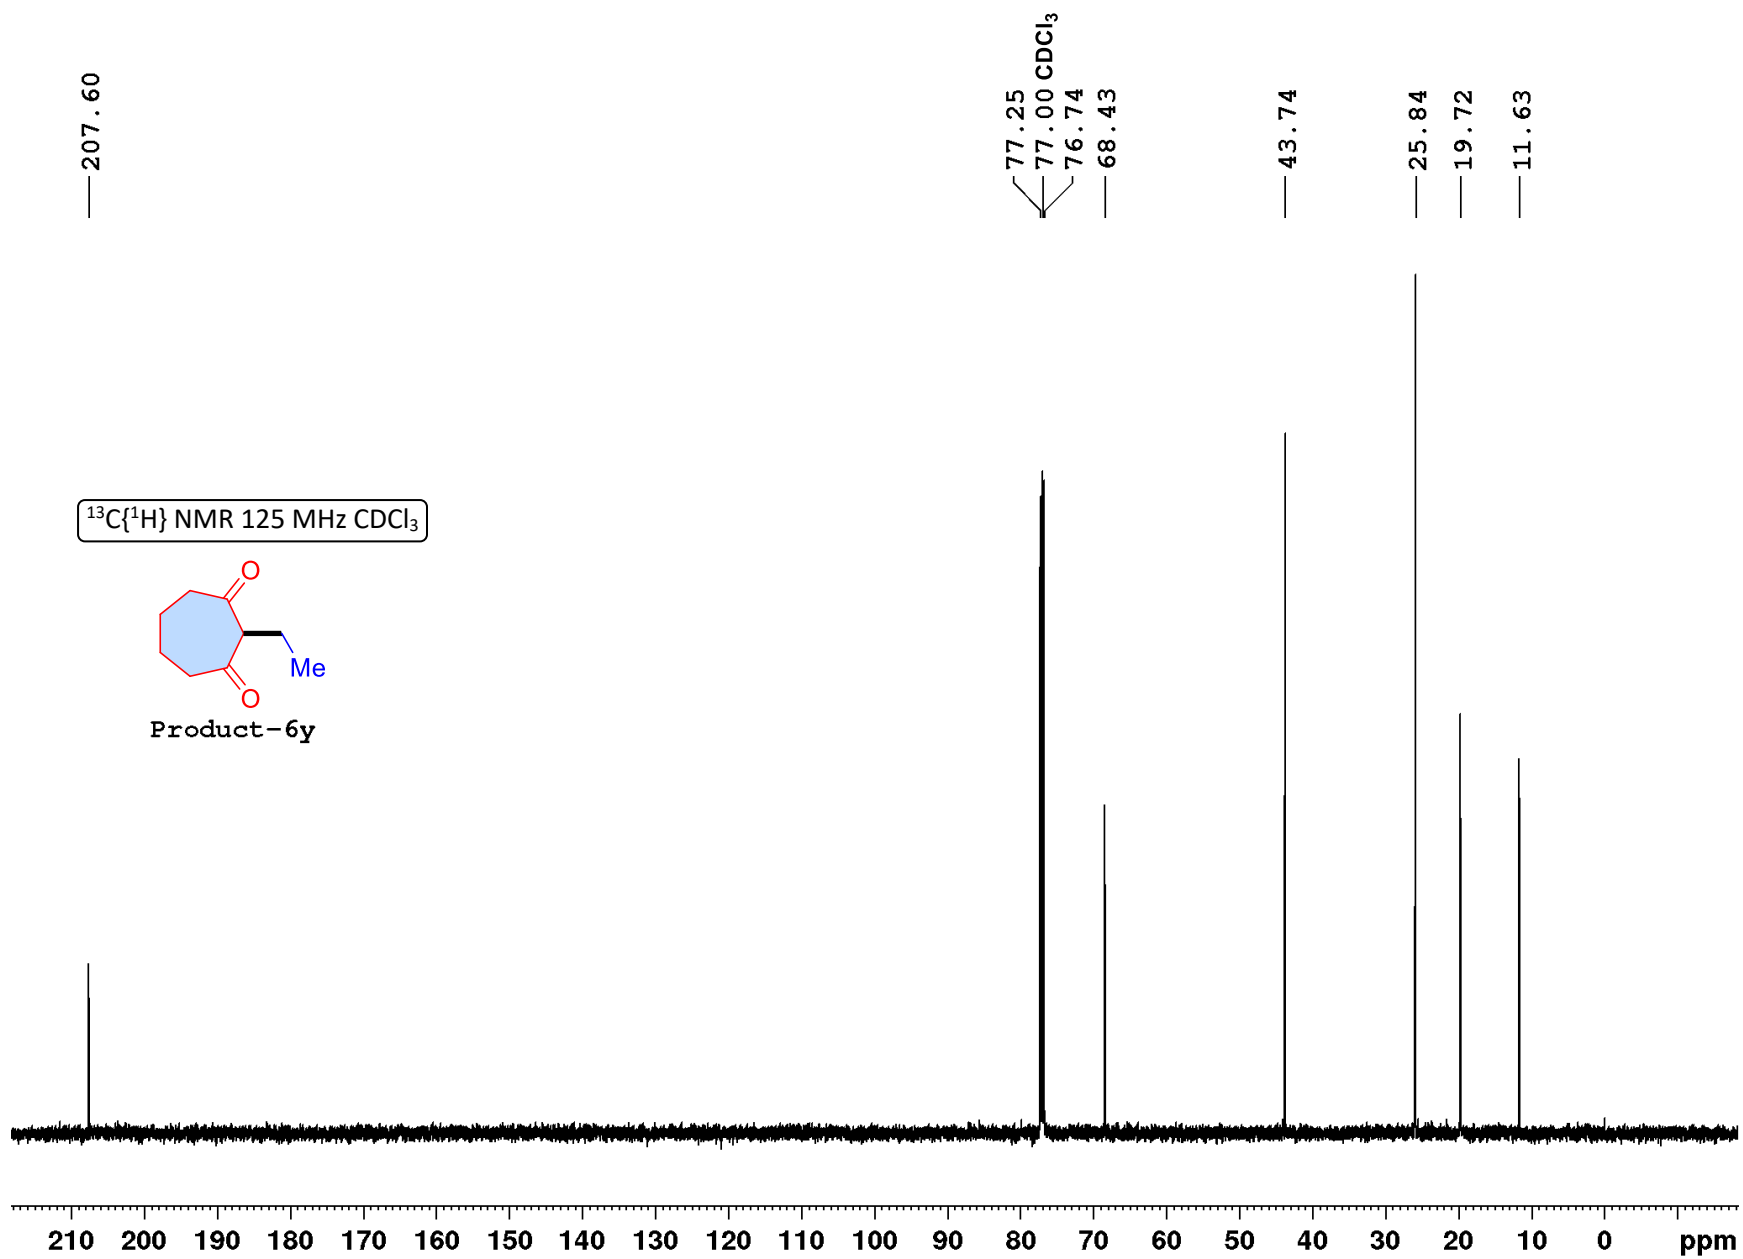

DEPT-135 125 MHz CDCl<sub>3</sub>

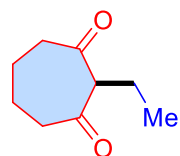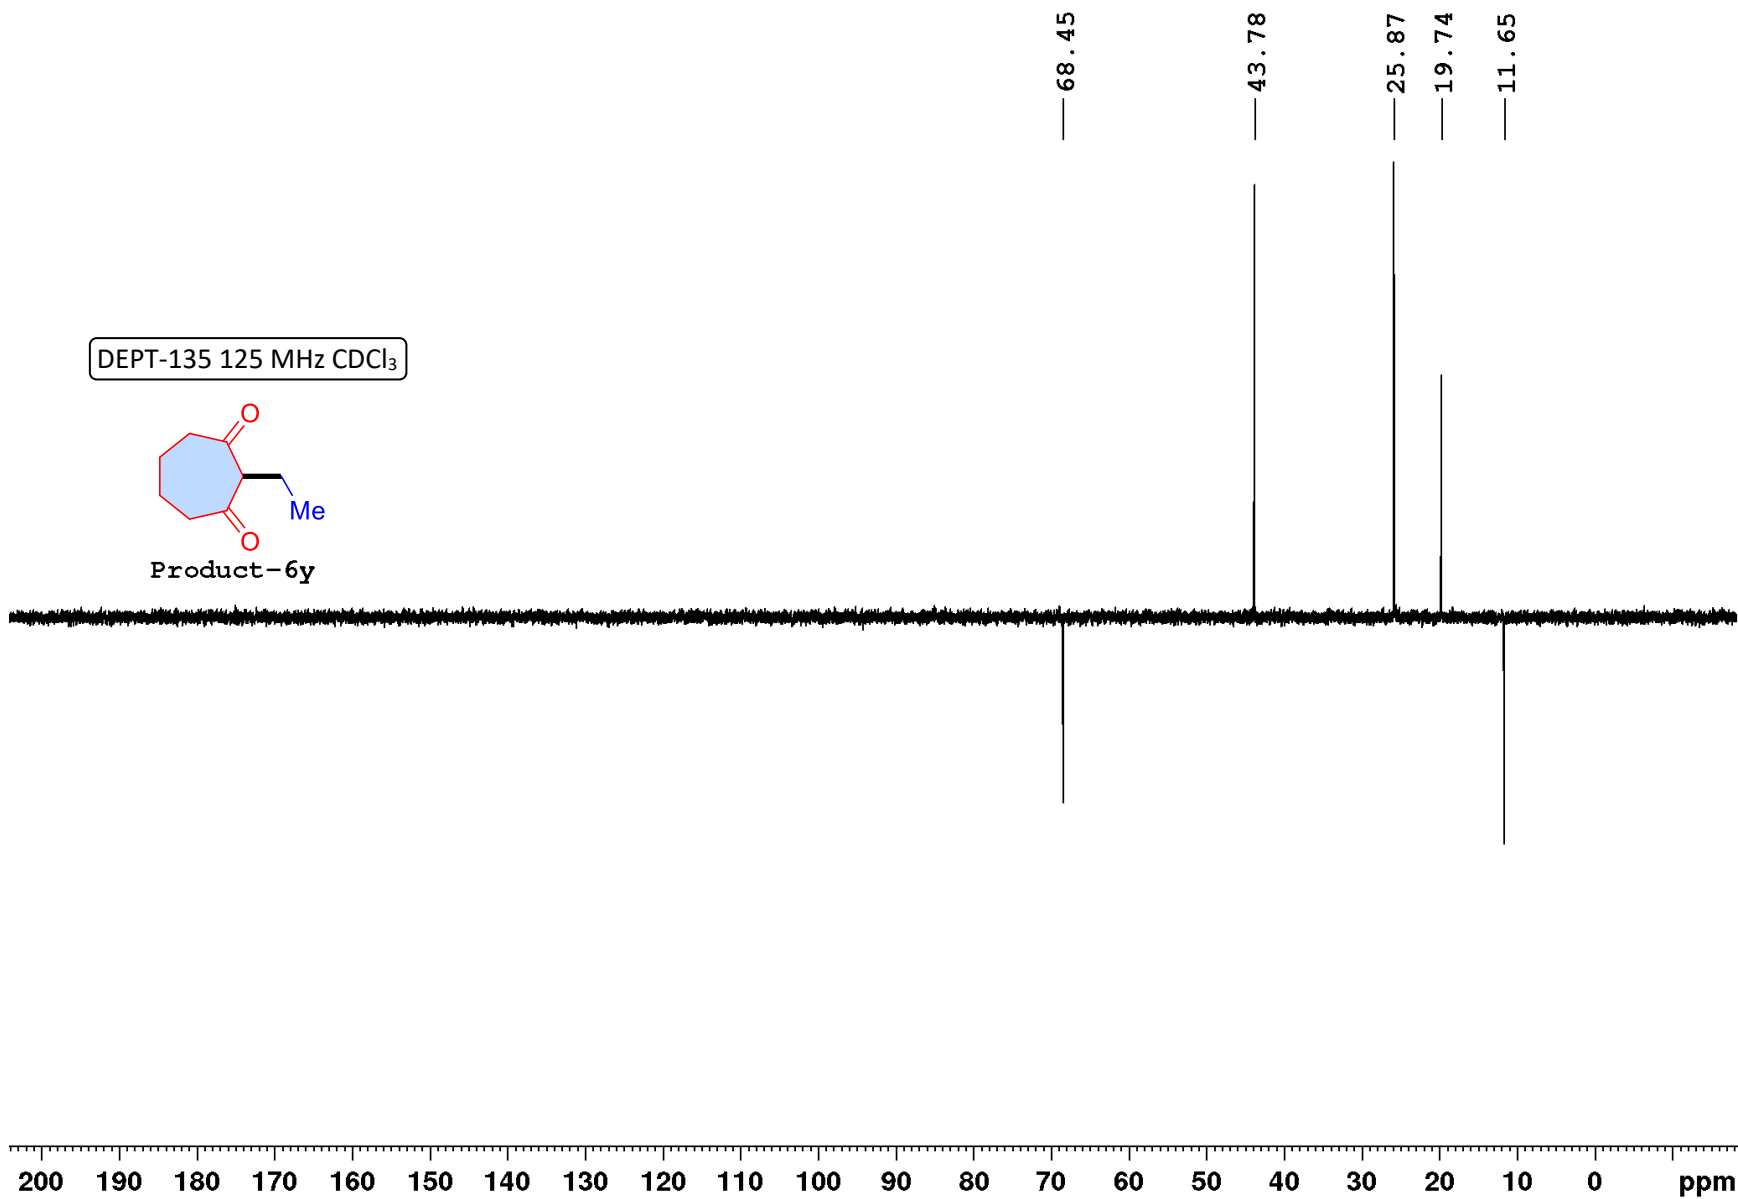

<sup>1</sup>H NMR 500 MHz CDCl<sub>3</sub>

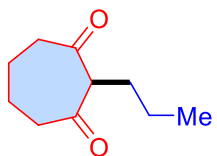

Product-6z

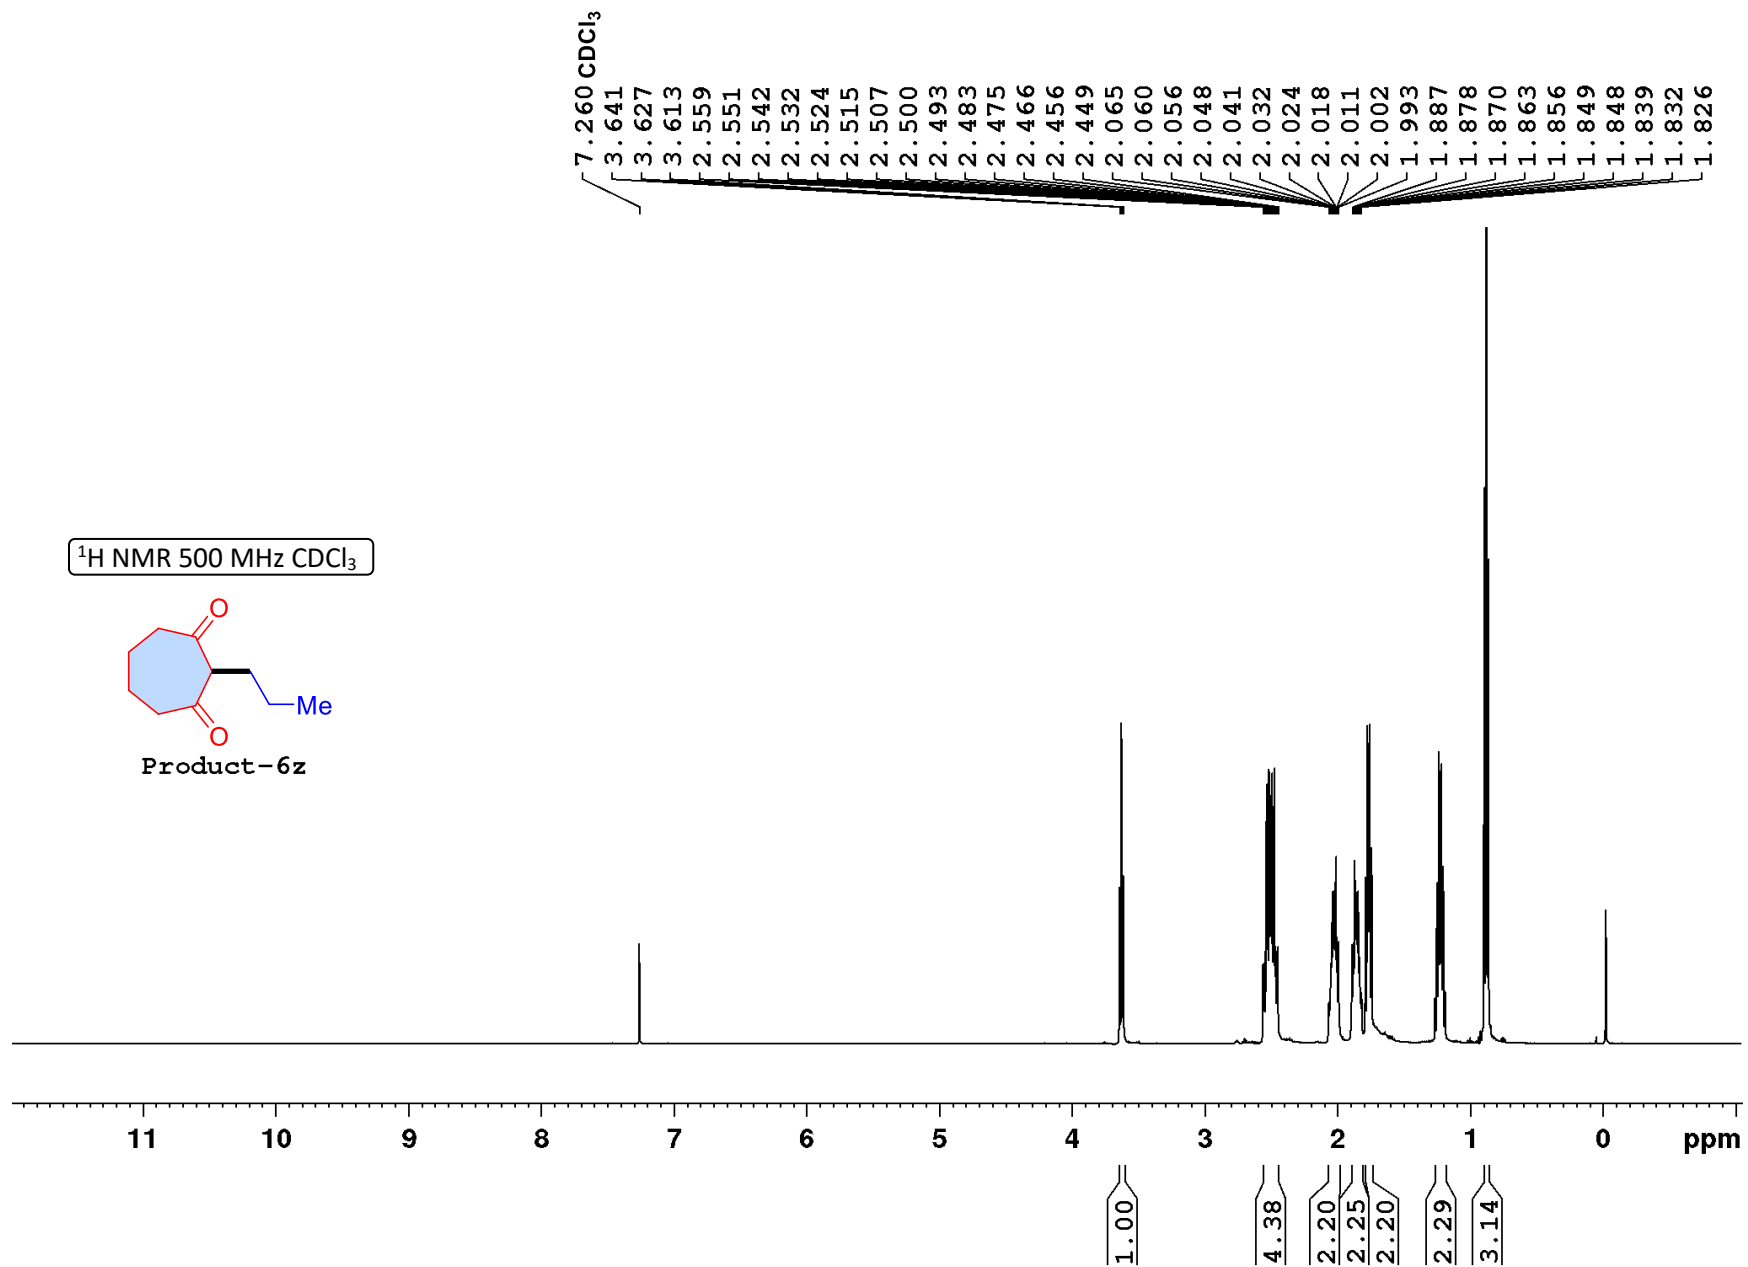

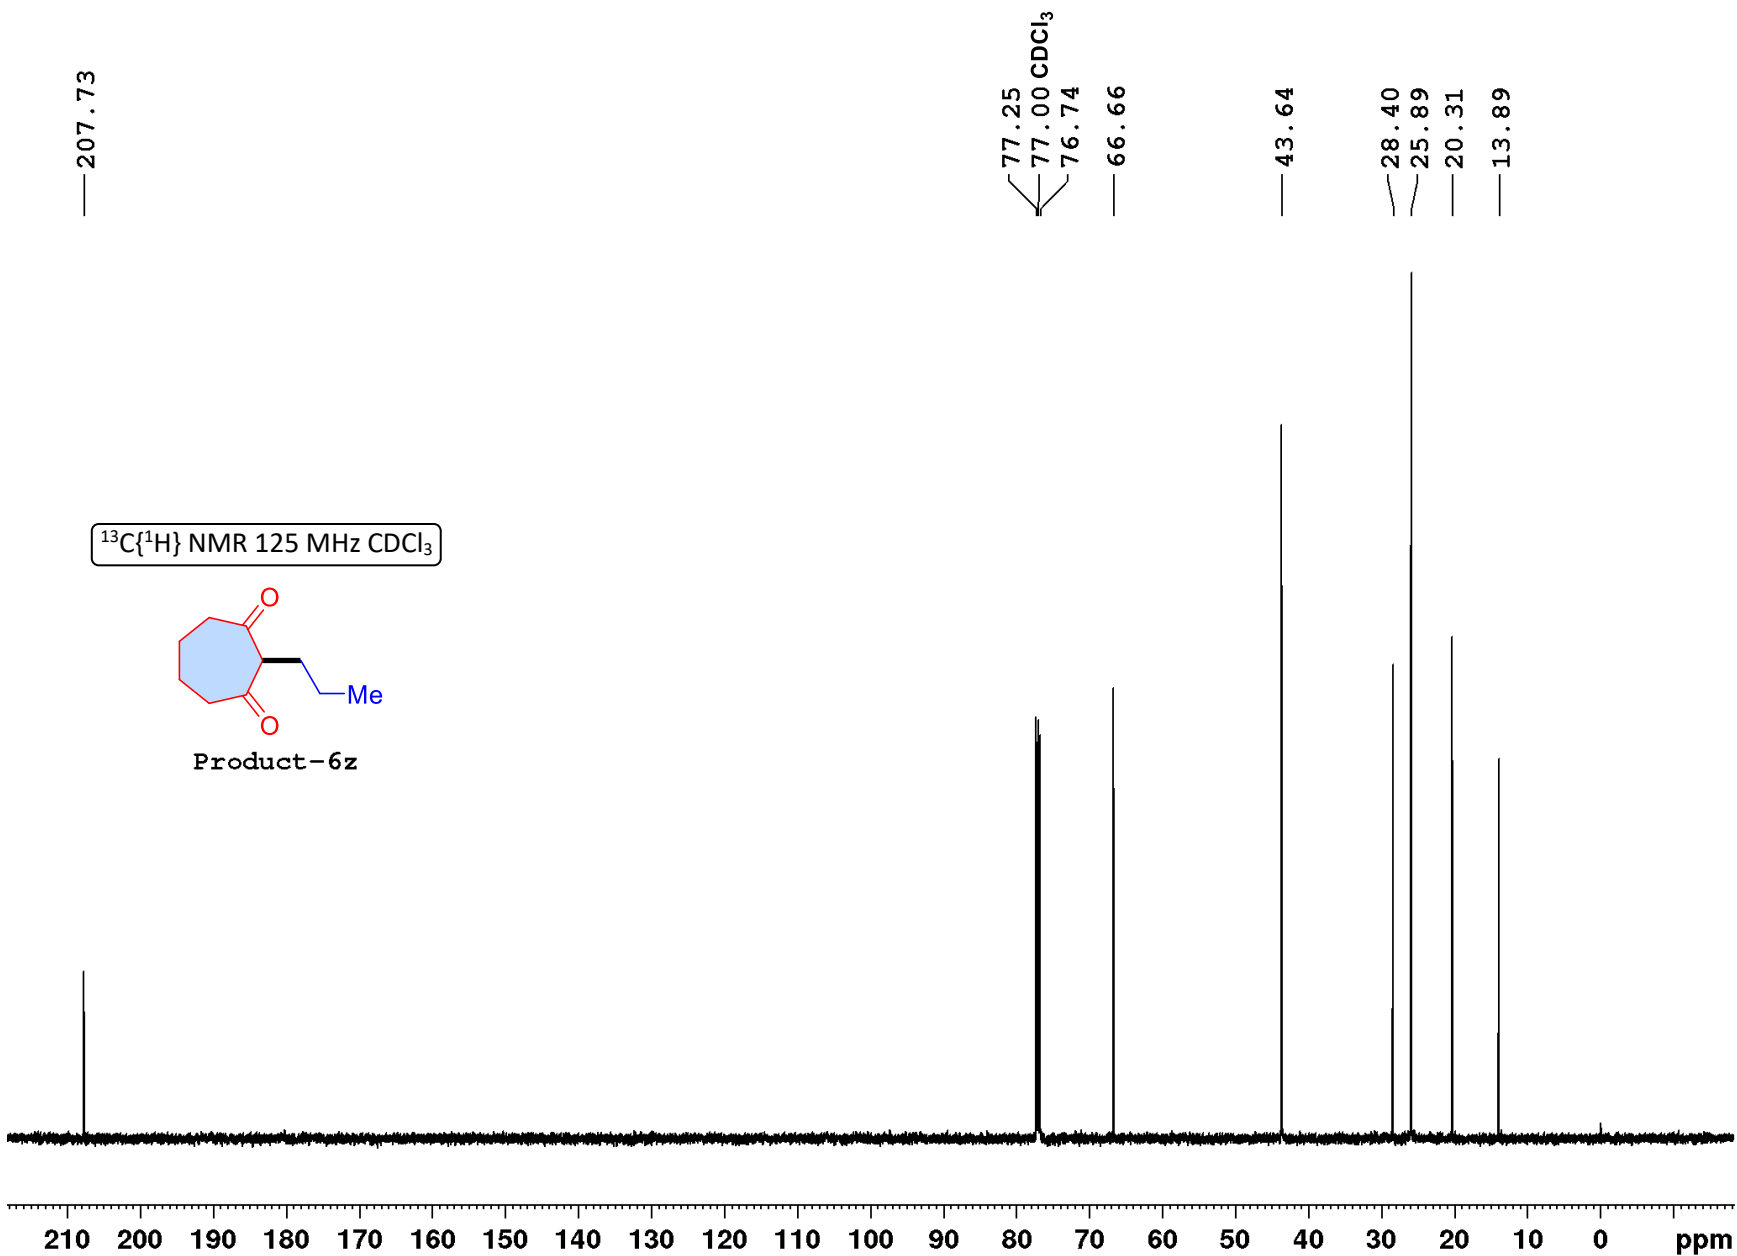



DEPT-135 125 MHz CDCl<sub>3</sub>

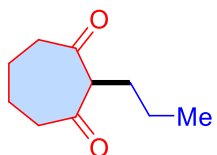

Product-6z

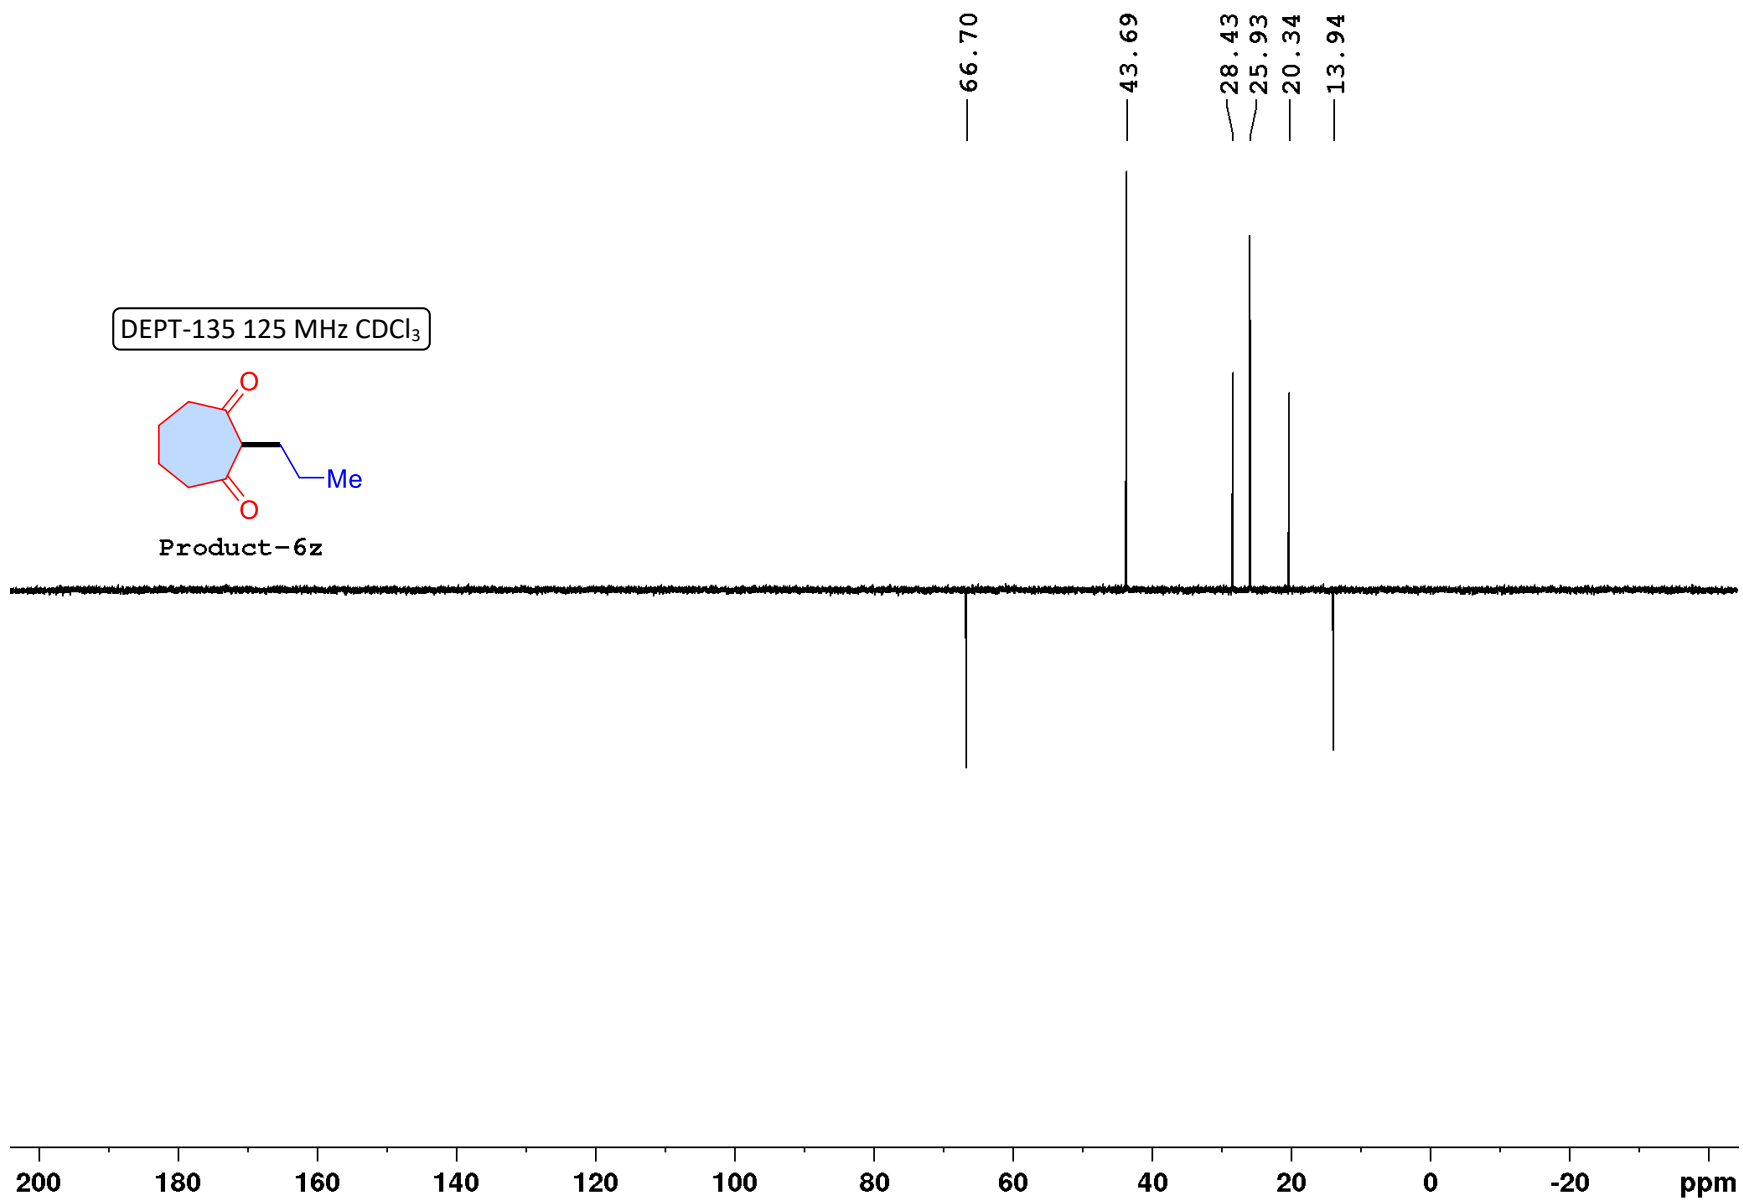

$^1\text{H}$  NMR 500 MHz  $\text{CDCl}_3$

$^1\text{H}$  NMR 500 MHz  $\text{CDCl}_3$

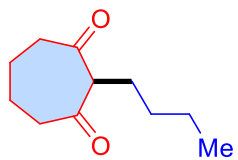

Product-6aa

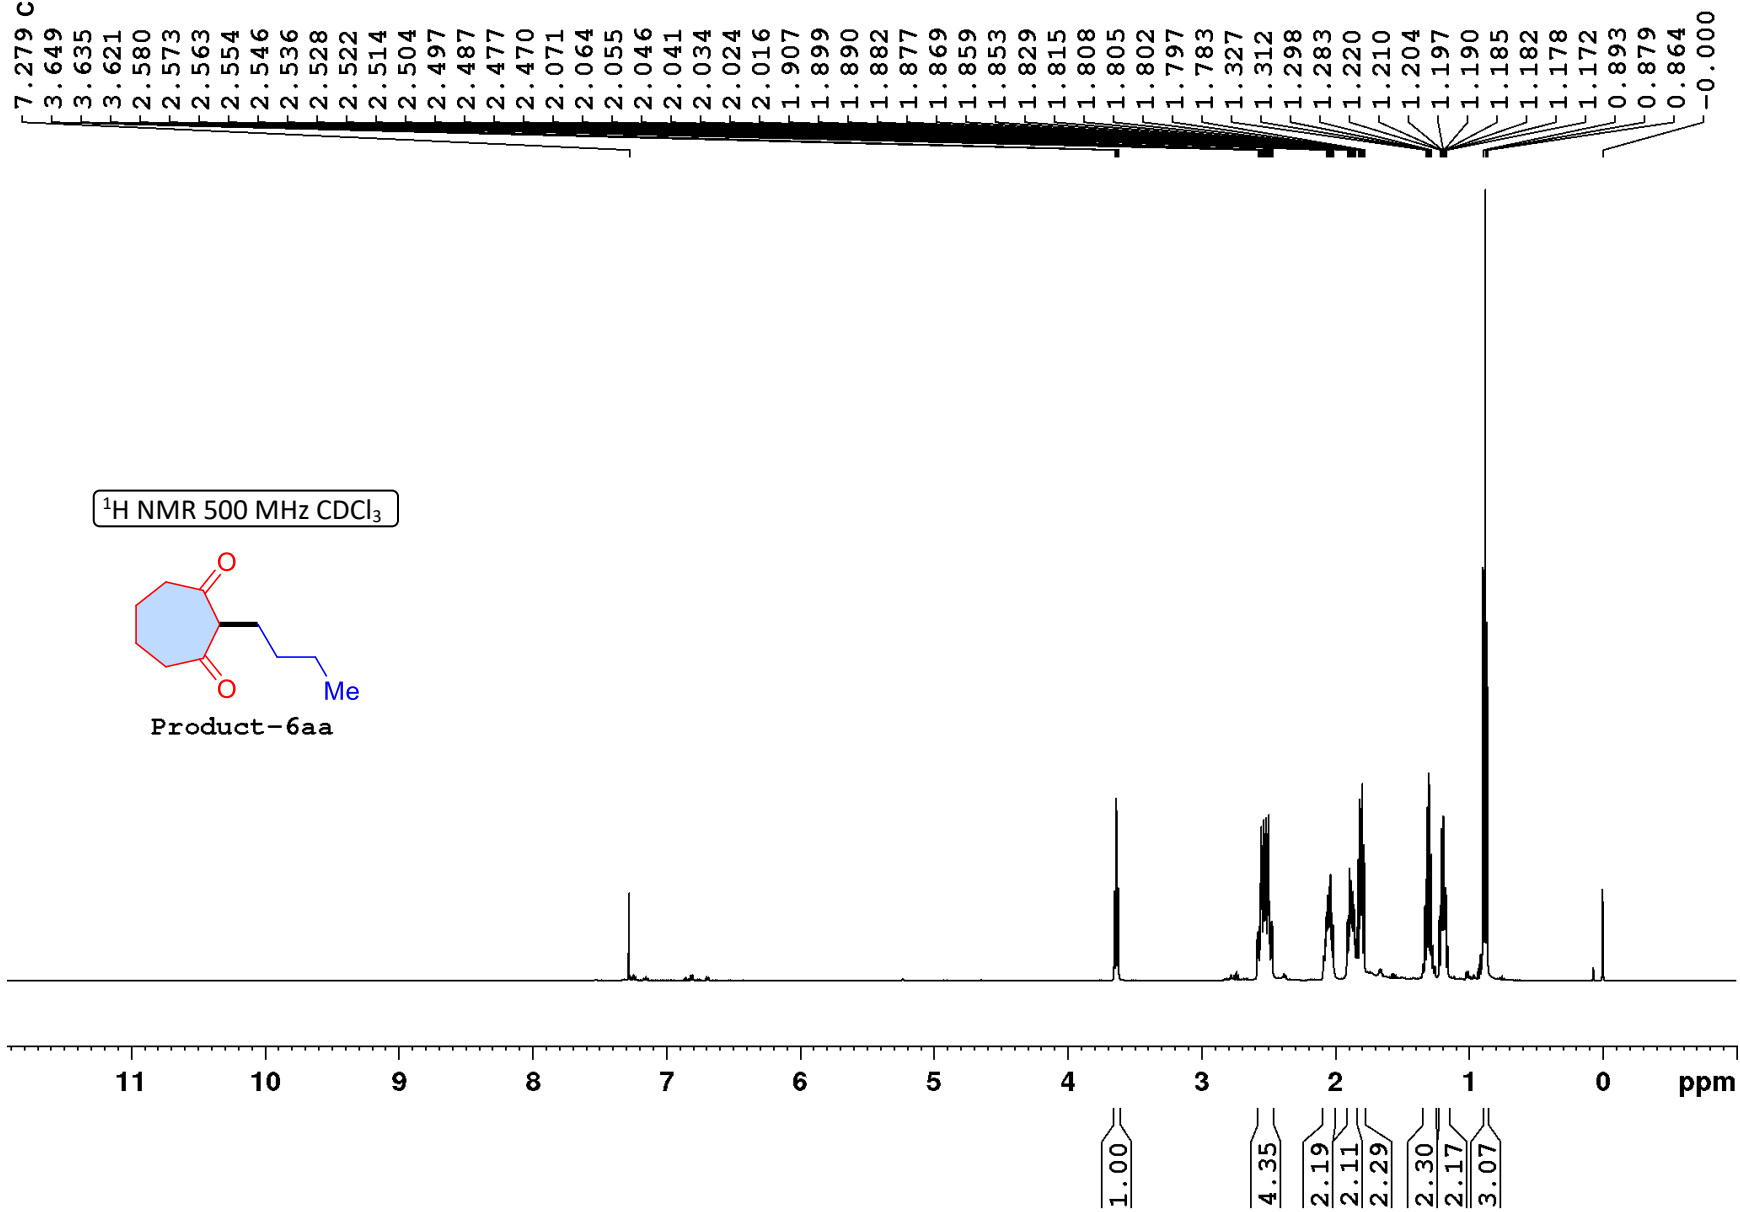

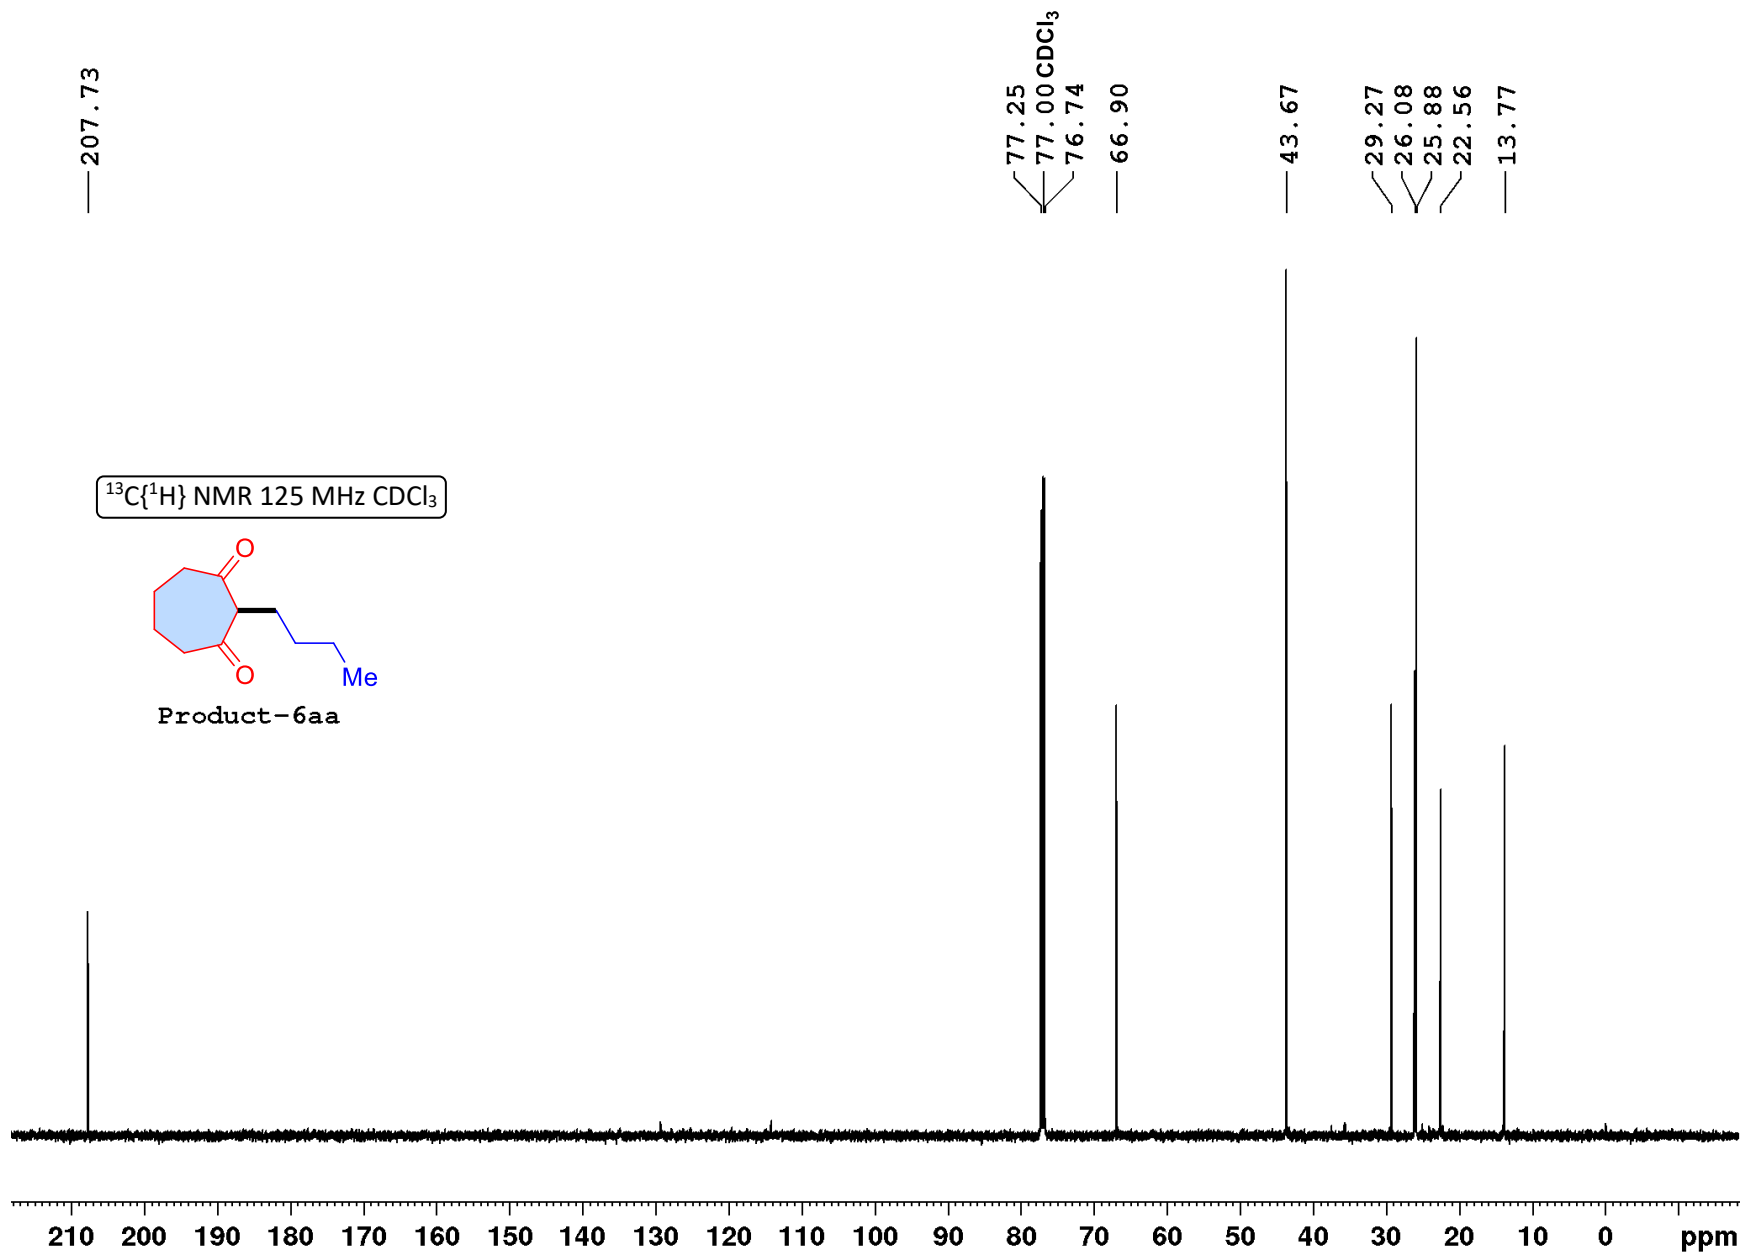

DEPT-135 125 MHz CDCl<sub>3</sub>

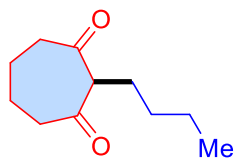

Product-6aa

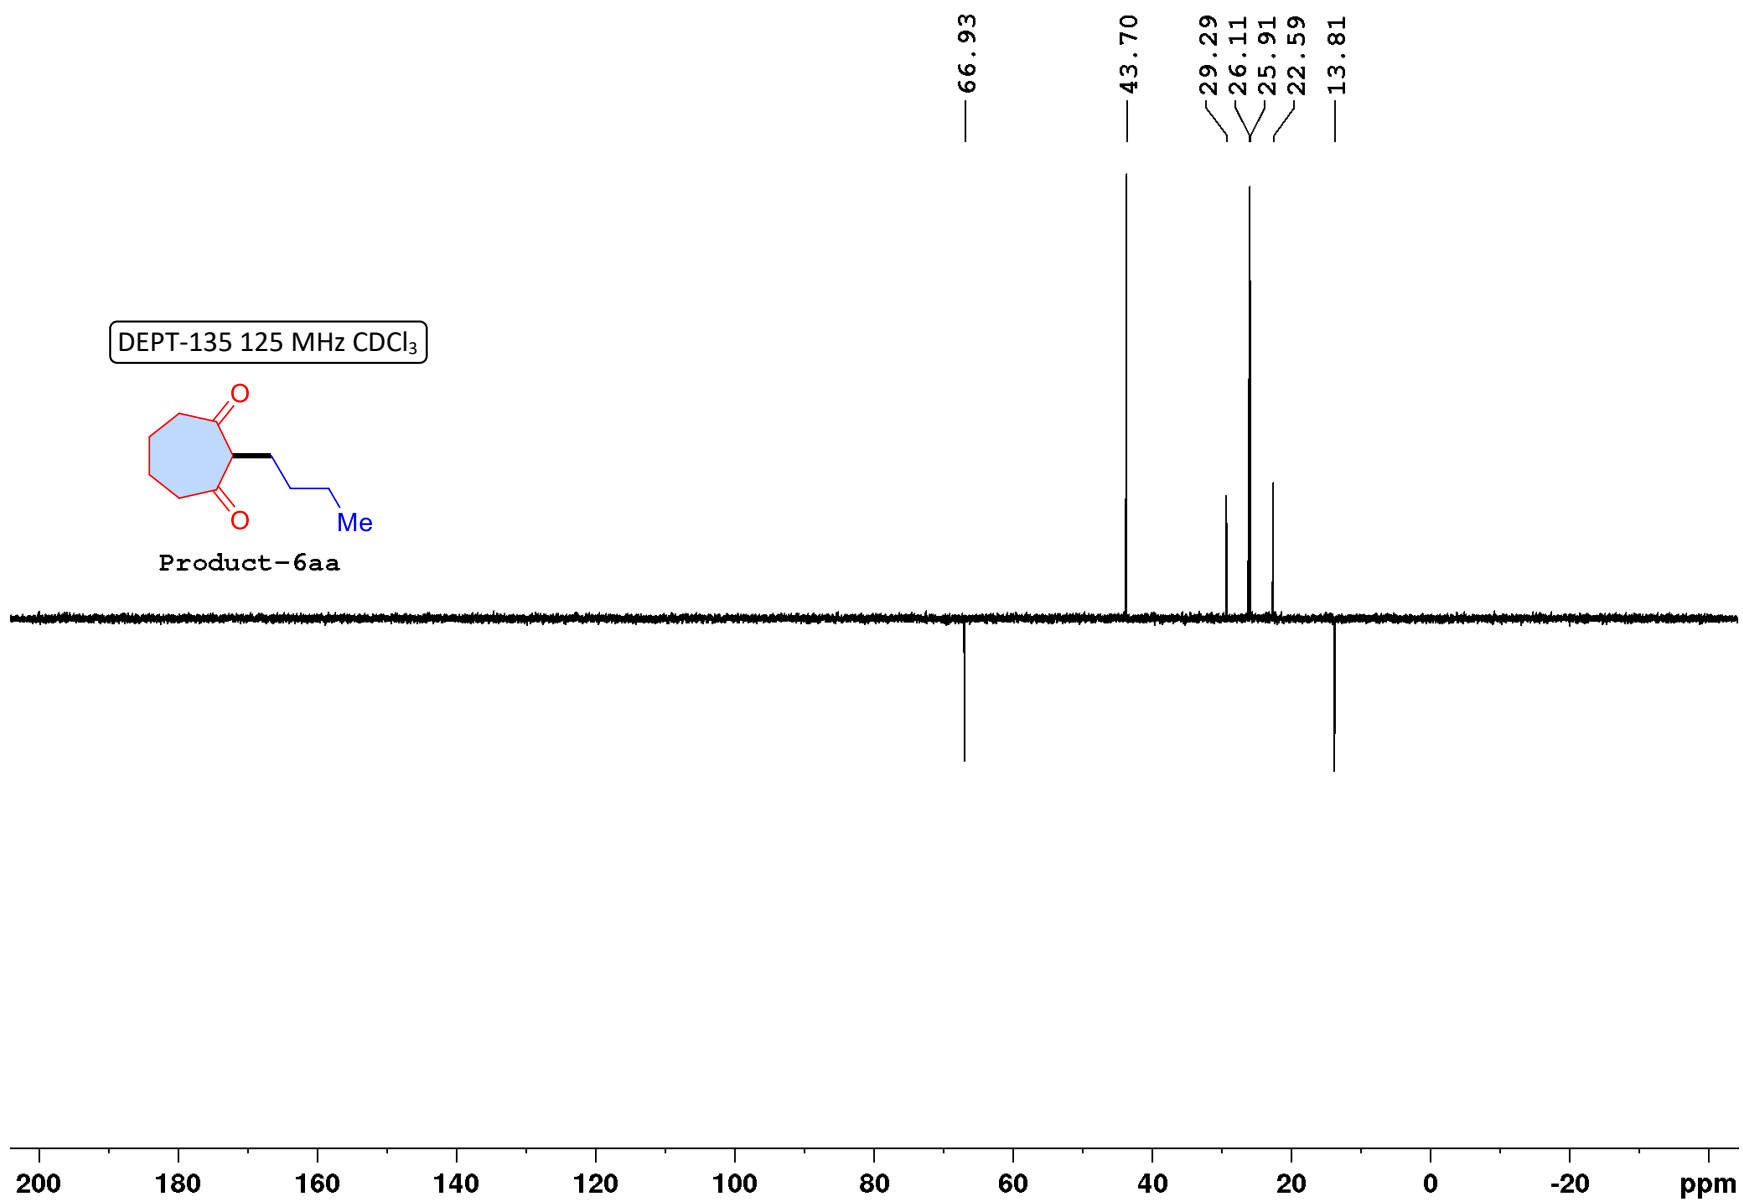

7.278 CDCl<sub>3</sub>

3.647  
3.634  
3.620  
2.552  
2.544  
2.535  
2.527  
2.520  
2.513  
2.503  
2.496  
2.486  
2.469  
2.063  
2.054  
2.045  
2.040  
2.033  
2.023  
1.907  
1.899  
1.889  
1.882  
1.876  
1.873  
1.868  
1.866  
1.858  
1.819  
1.806  
1.800  
1.789  
1.775  
1.296  
1.283  
1.282  
1.278  
1.271  
1.264  
1.259  
1.250  
1.245  
1.243  
1.237  
1.233  
1.230  
1.223  
1.216  
1.211  
1.204  
1.194  
1.190  
0.880  
0.875  
0.866  
0.852  
-0.000

<sup>1</sup>H NMR 500 MHz CDCl<sub>3</sub>

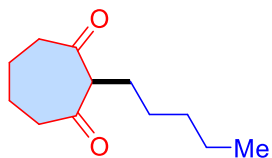

Product-6bb

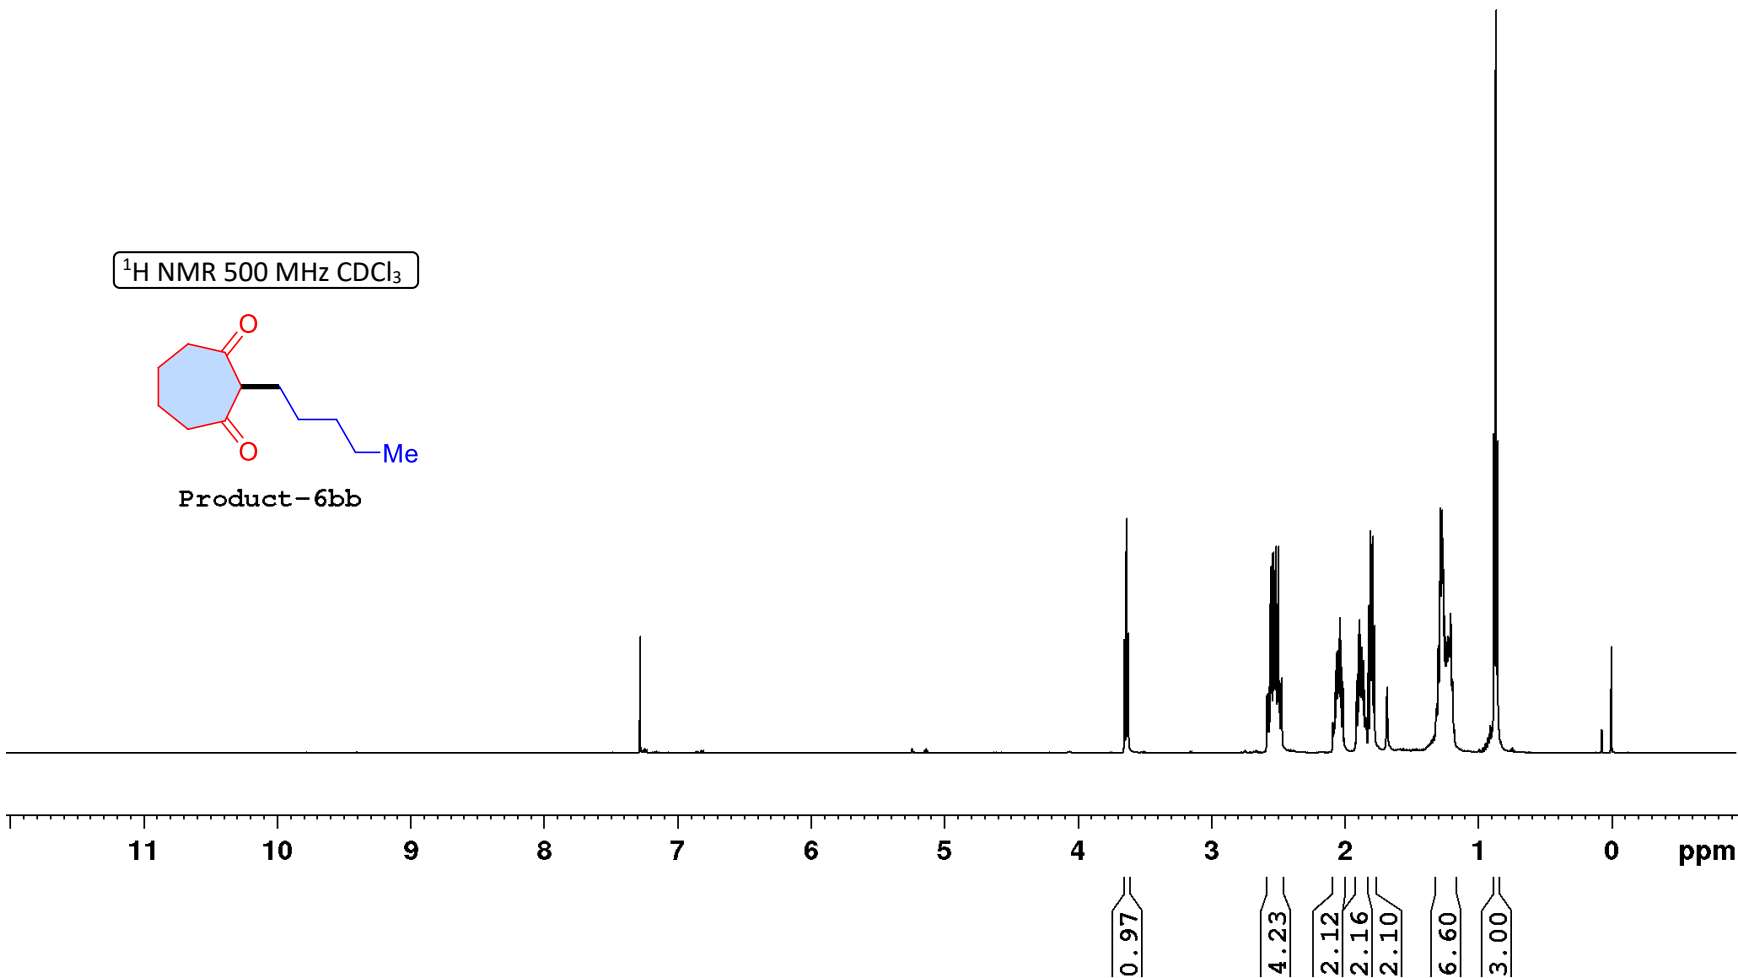

— 207.72

77.25  
77.00 CDCl<sub>3</sub>  
76.74  
— 66.94

— 43.67

31.64  
26.77  
26.33  
25.89  
22.34  
— 13.91

<sup>13</sup>C{<sup>1</sup>H} NMR 125 MHz CDCl<sub>3</sub>

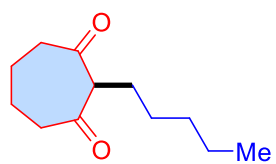

Product-6bb

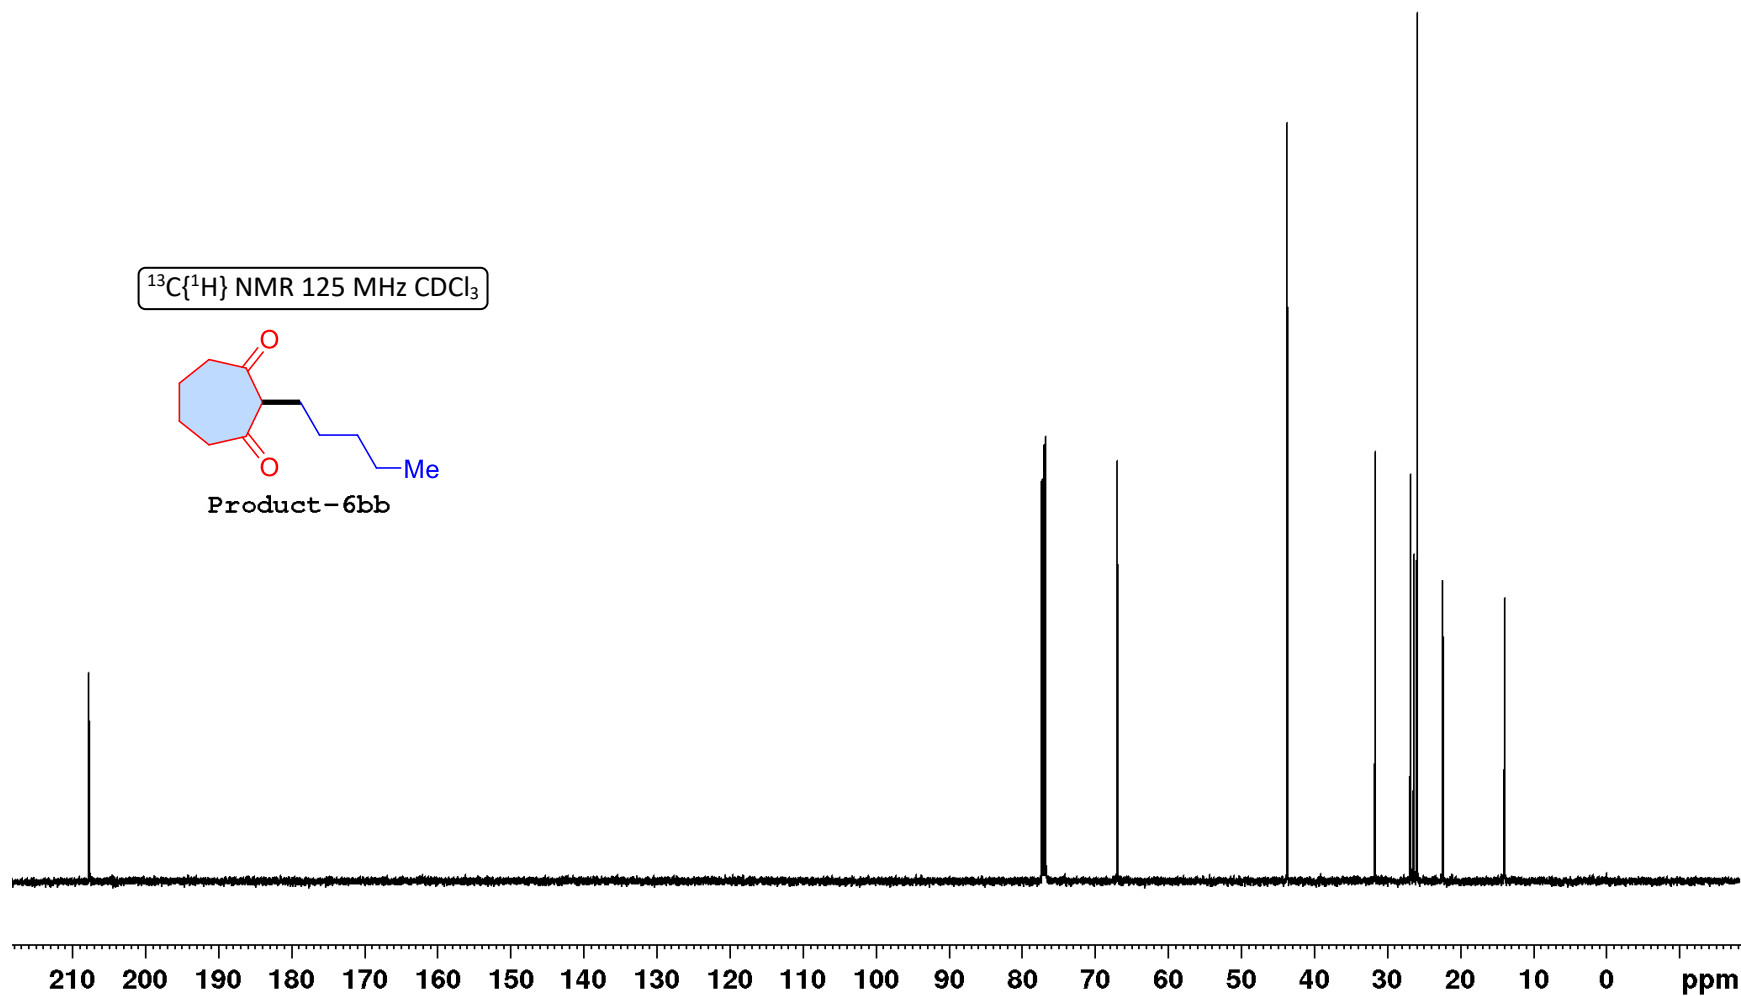

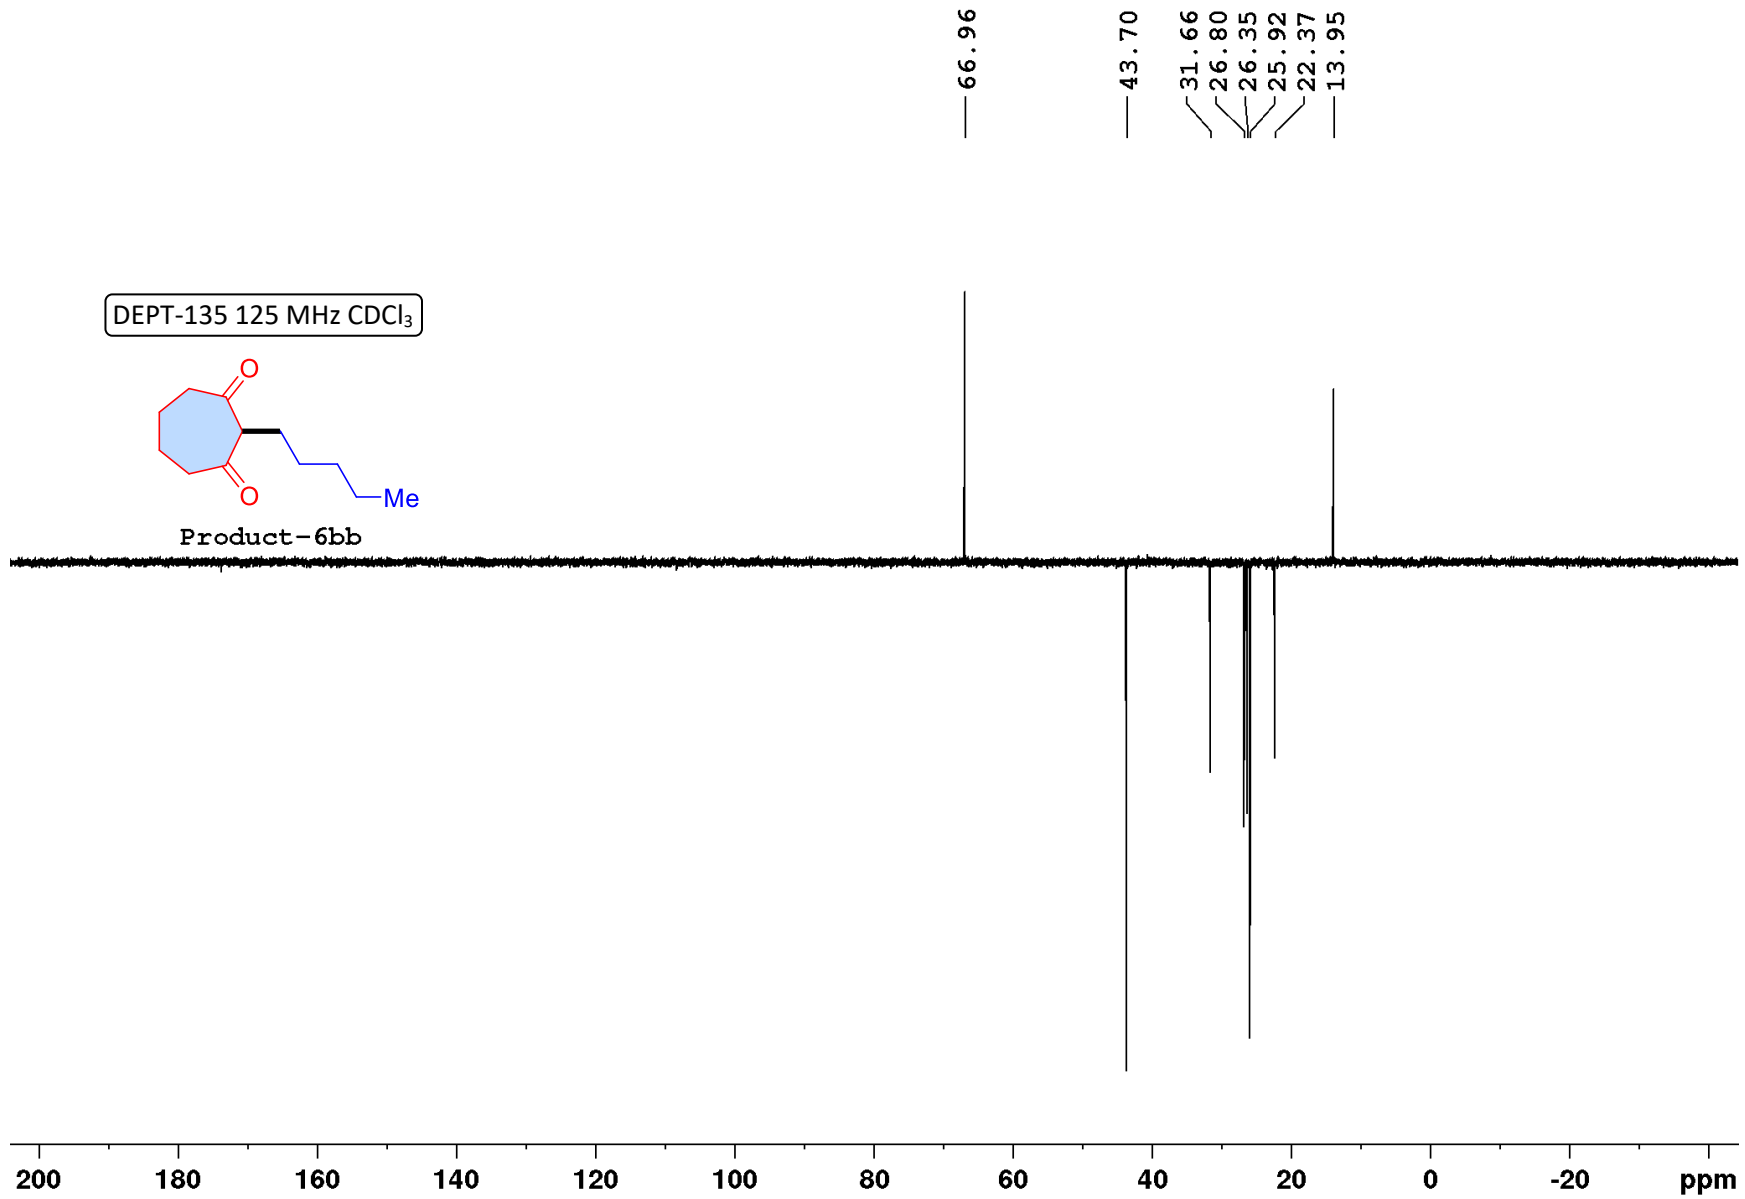

7.280 CDCl<sub>3</sub>

3.643  
3.629  
3.615  
2.577  
2.569  
2.560  
2.550  
2.542  
2.533  
2.525  
2.519  
2.511  
2.502  
2.494  
2.485  
2.475  
2.467  
2.068  
2.061  
2.052  
2.043  
2.038  
2.031  
2.021  
2.013  
2.010  
1.910  
1.906  
1.898  
1.888  
1.881  
1.875  
1.867  
1.858  
1.851  
1.840  
1.821  
1.807  
1.790  
1.776  
1.296  
1.292  
1.281  
1.269  
1.257  
1.255  
1.237  
1.229  
1.213  
1.207  
1.199  
1.187  
1.184  
0.880  
0.867  
0.853  
-0.000

<sup>1</sup>H NMR 500 MHz CDCl<sub>3</sub>

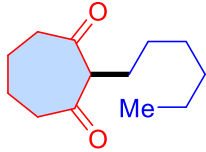

Product-6cc

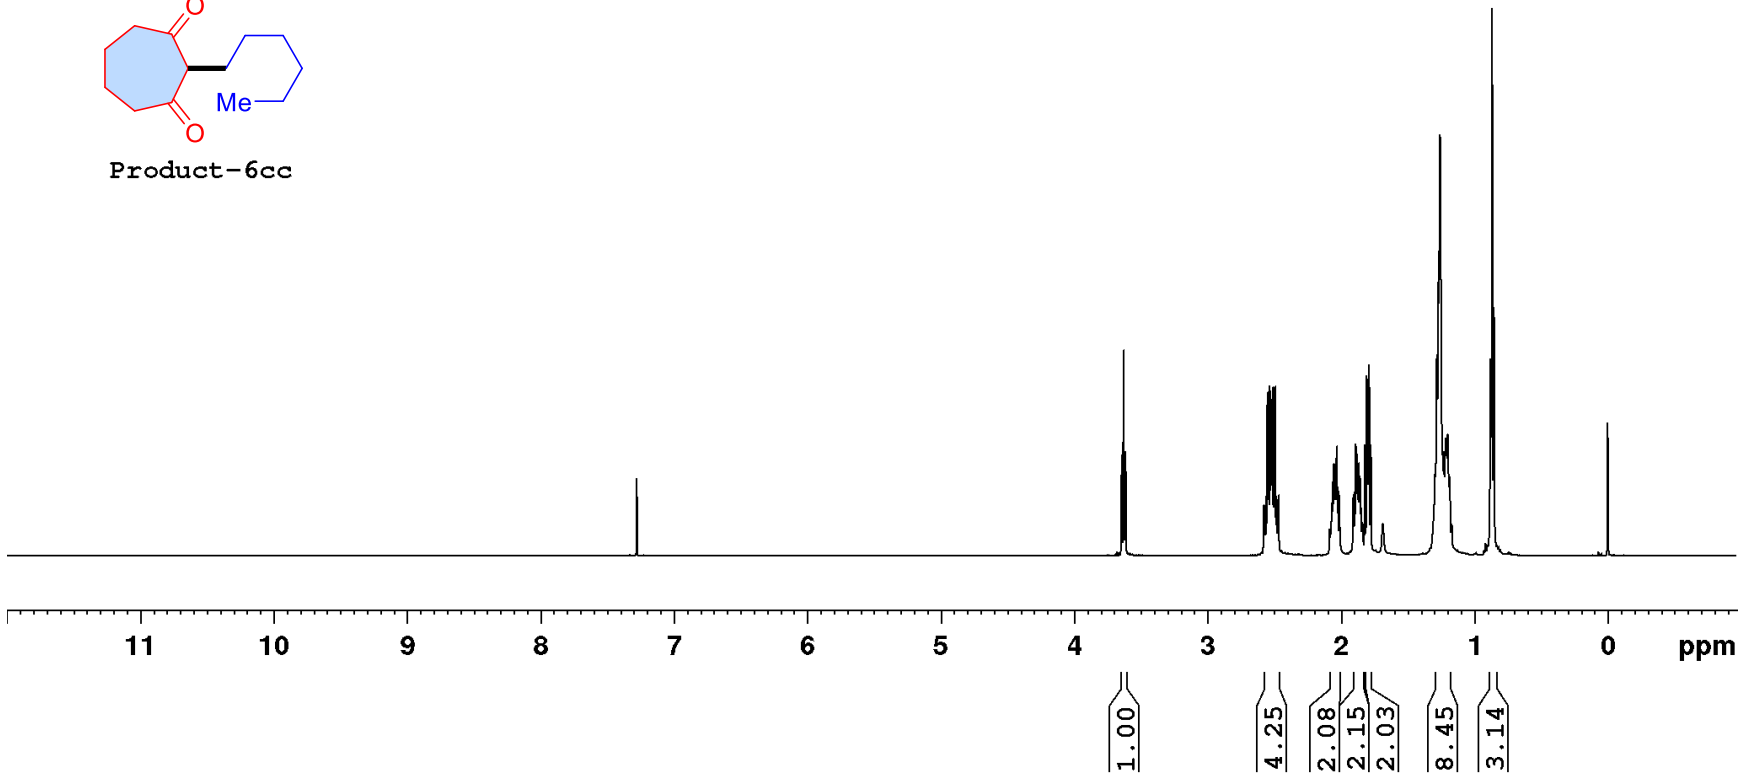



— 207.73

77.25  
76.99 CDCl<sub>3</sub>  
76.74  
— 66.92

— 43.66  
31.48  
29.11  
27.04  
26.35  
25.88  
22.49  
— 13.97

<sup>13</sup>C{<sup>1</sup>H} NMR 125 MHz CDCl<sub>3</sub>

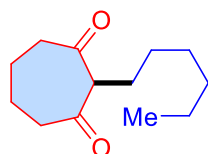

Product-6cc

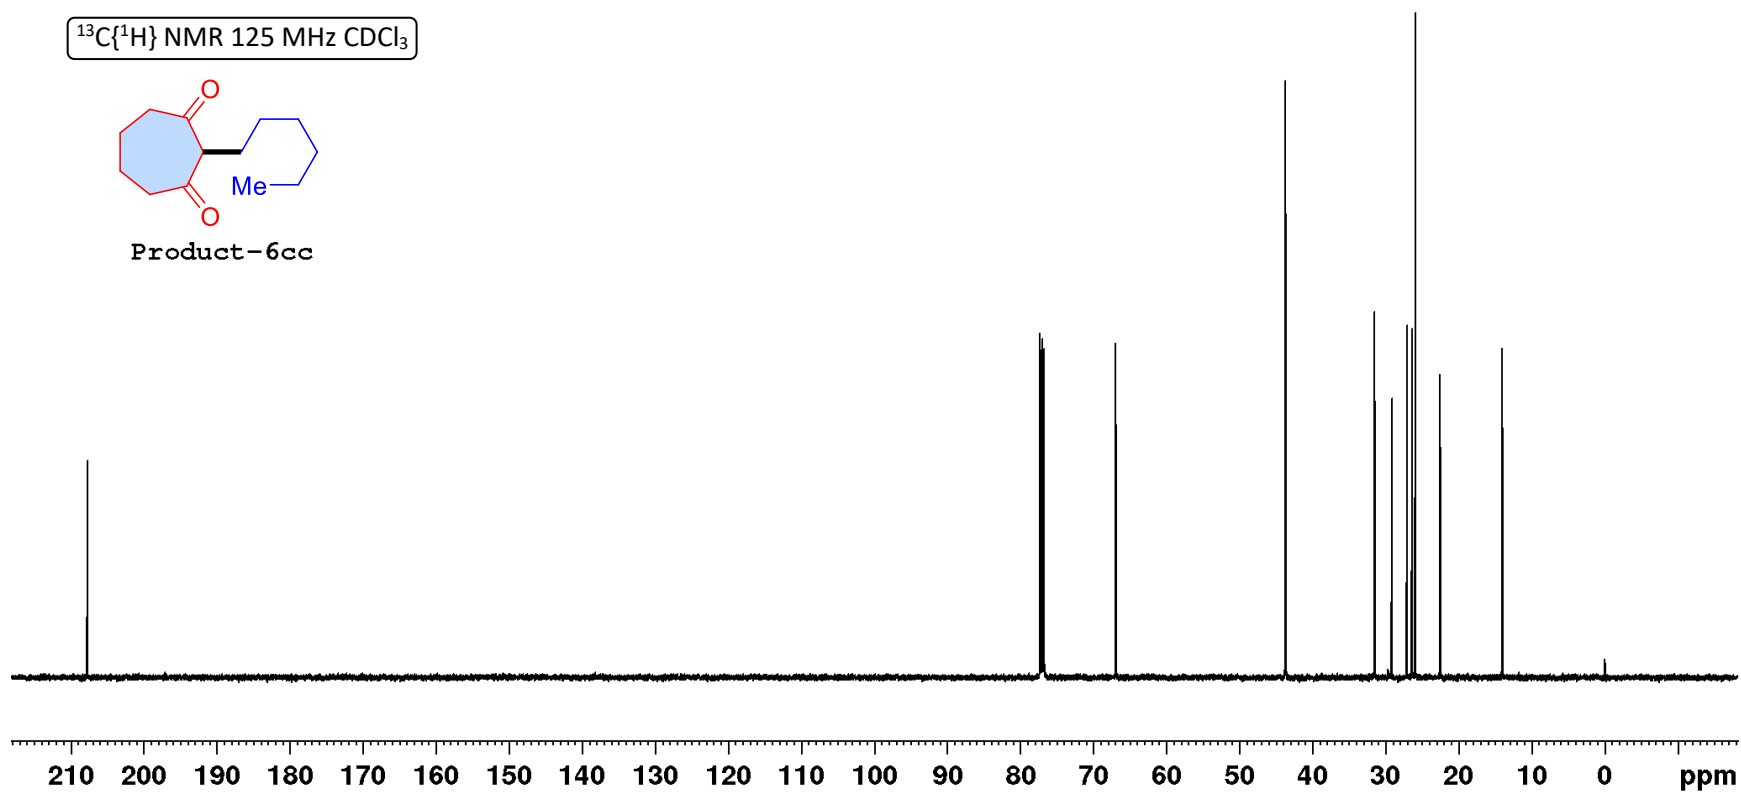

DEPT-135 125 MHz CDCl<sub>3</sub>

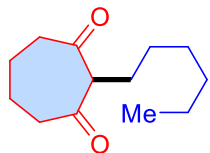

Product-6cc

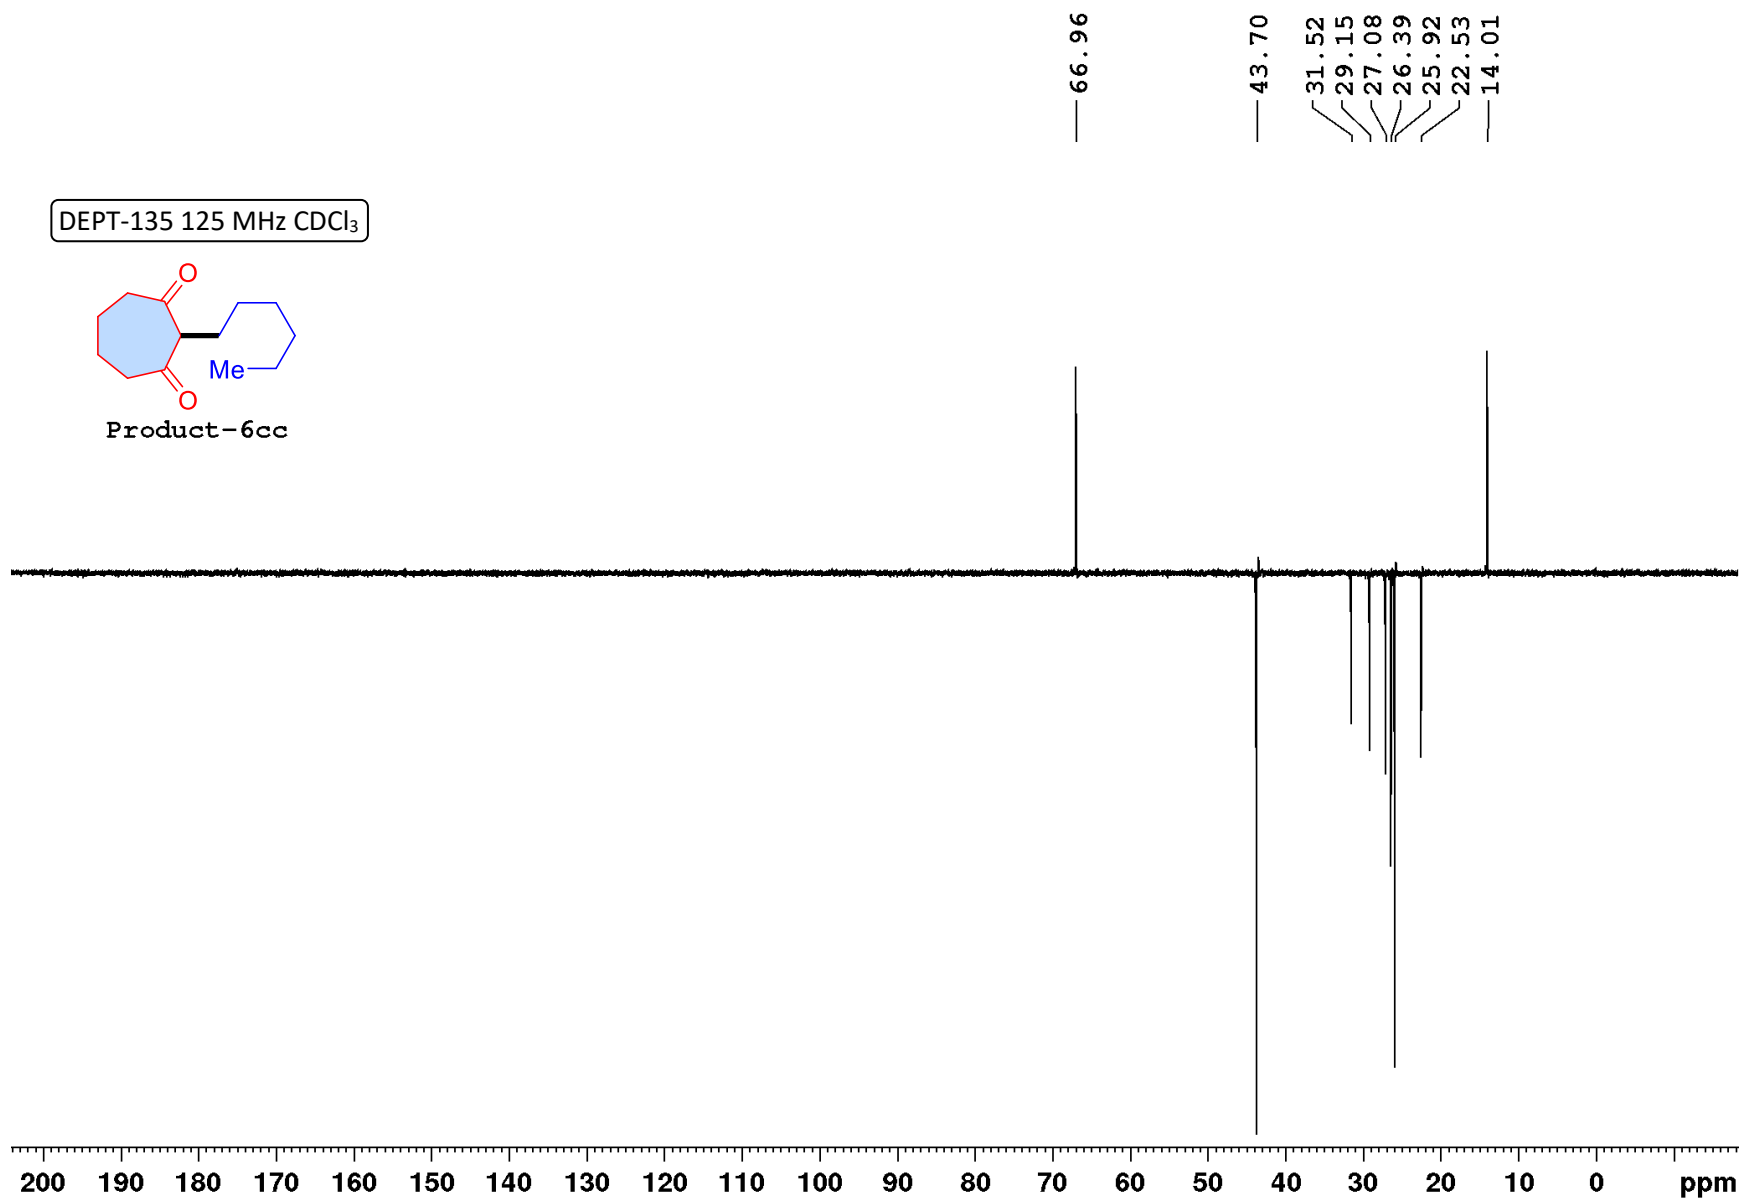

<sup>1</sup>H NMR 500 MHz CDCl<sub>3</sub>

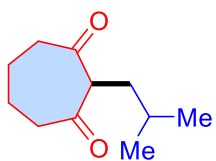

Product-6dd

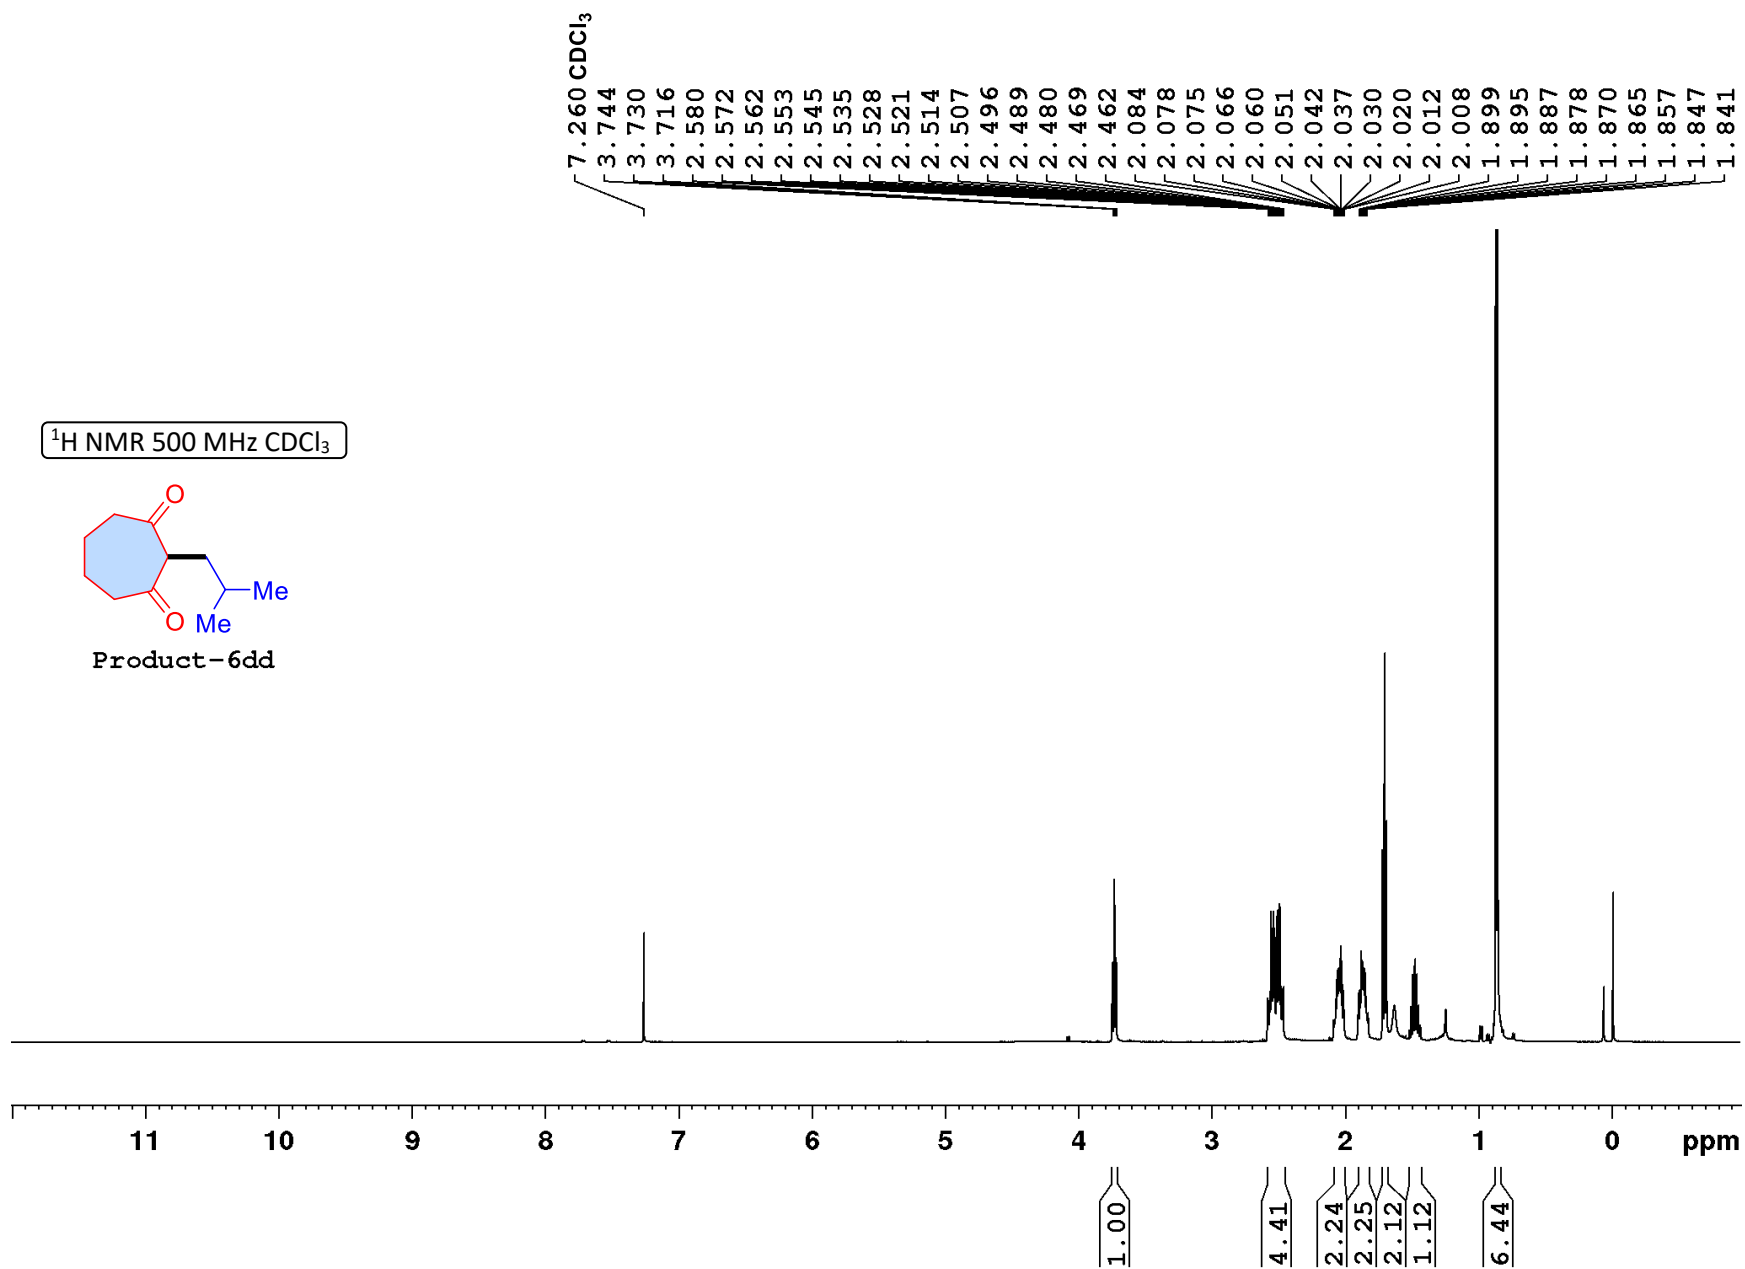

$^{13}\text{C}\{^1\text{H}\}$  NMR 125 MHz  $\text{CDCl}_3$

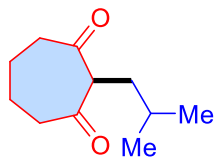

Product-6dd

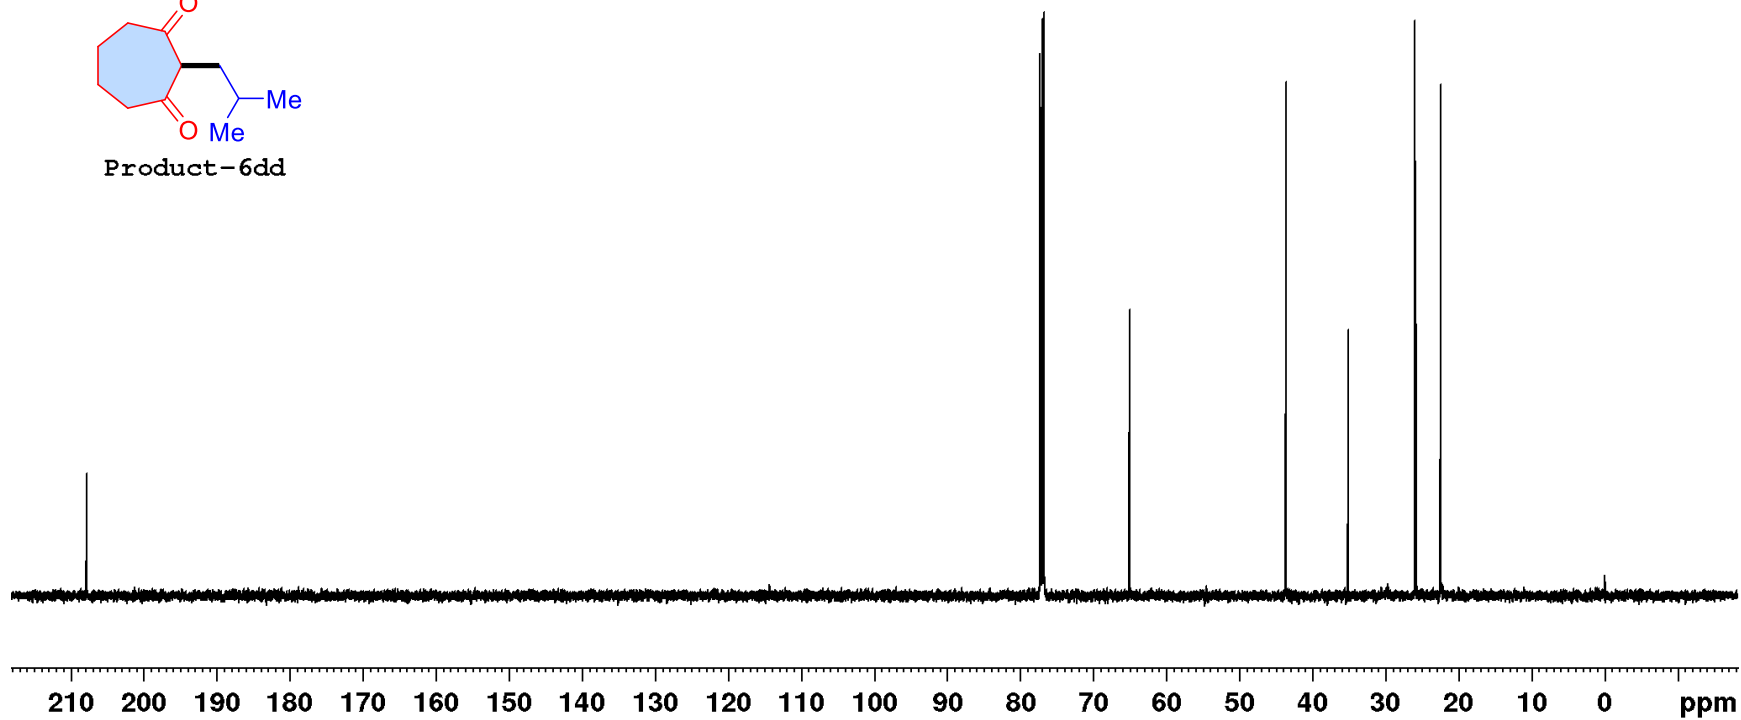

DEPT-135 125 MHz CDCl<sub>3</sub>

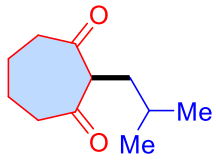

Product-6dd

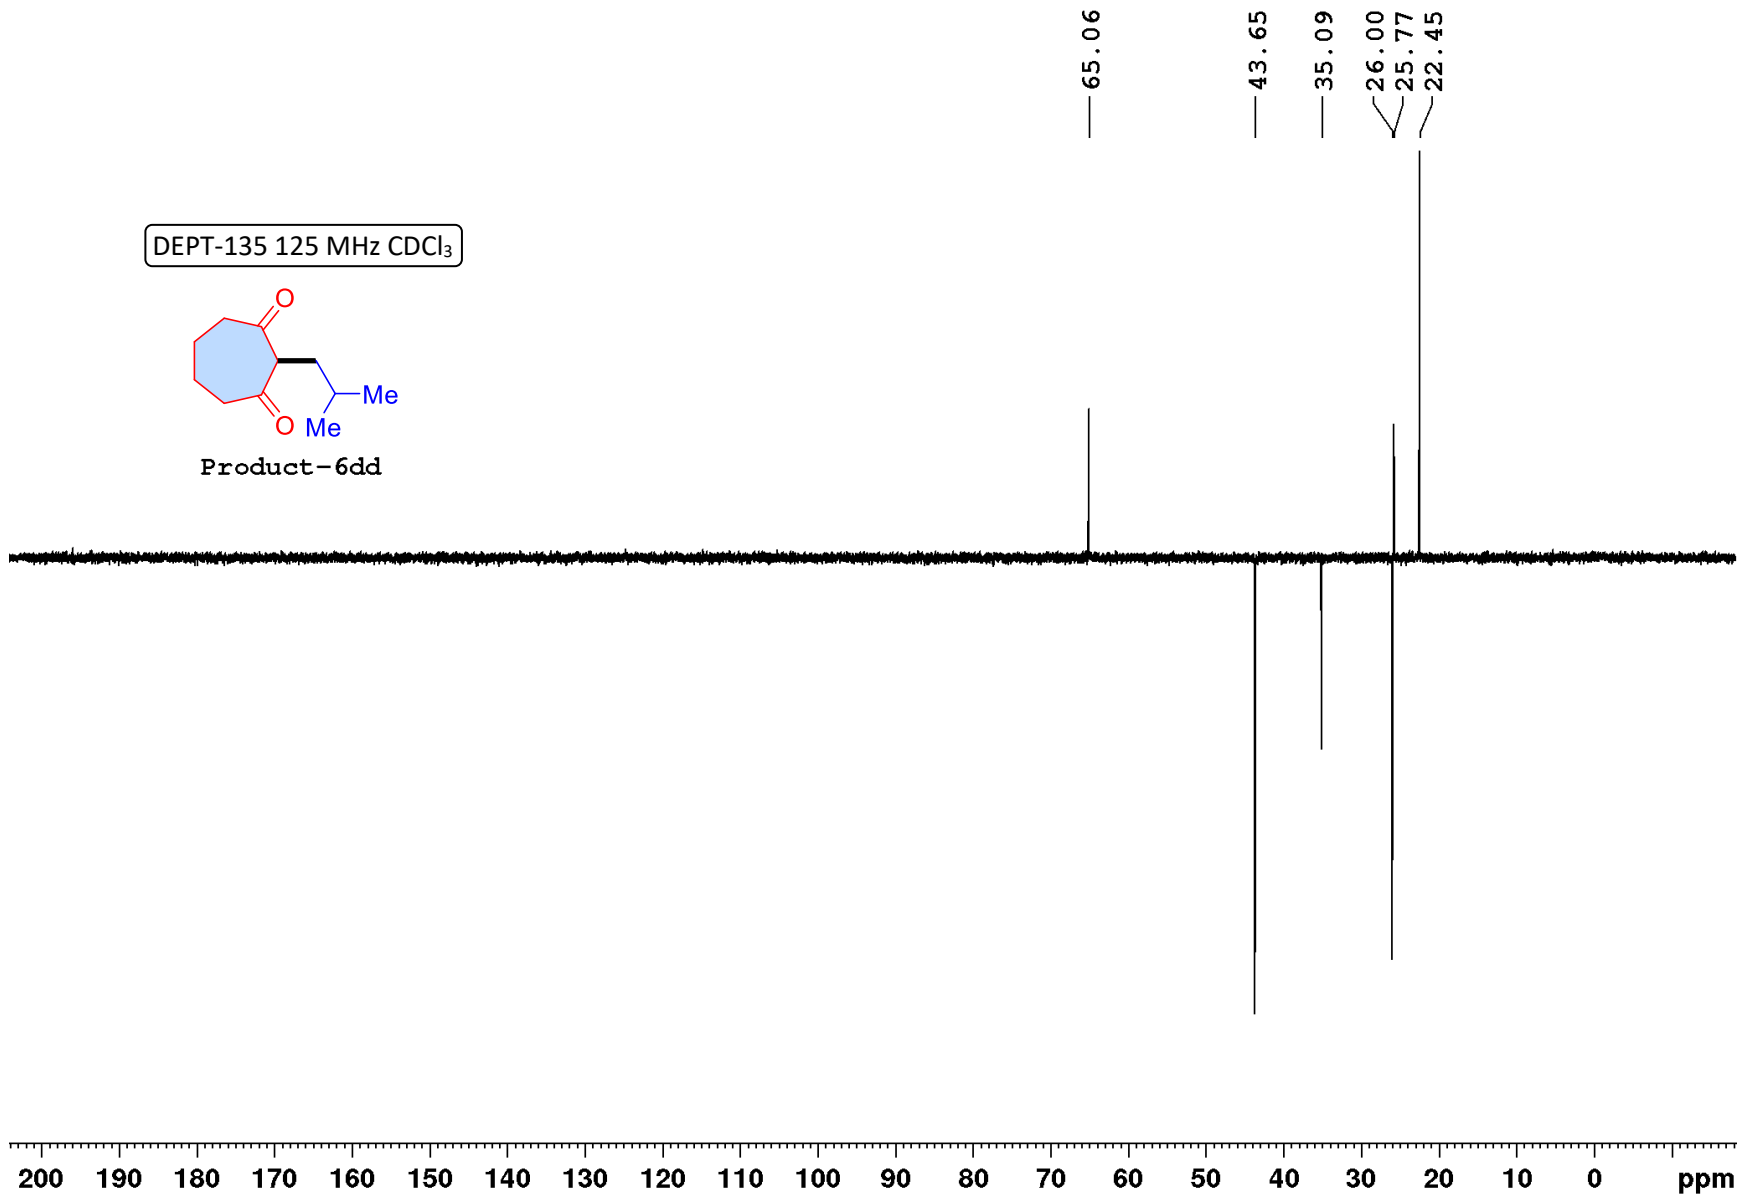

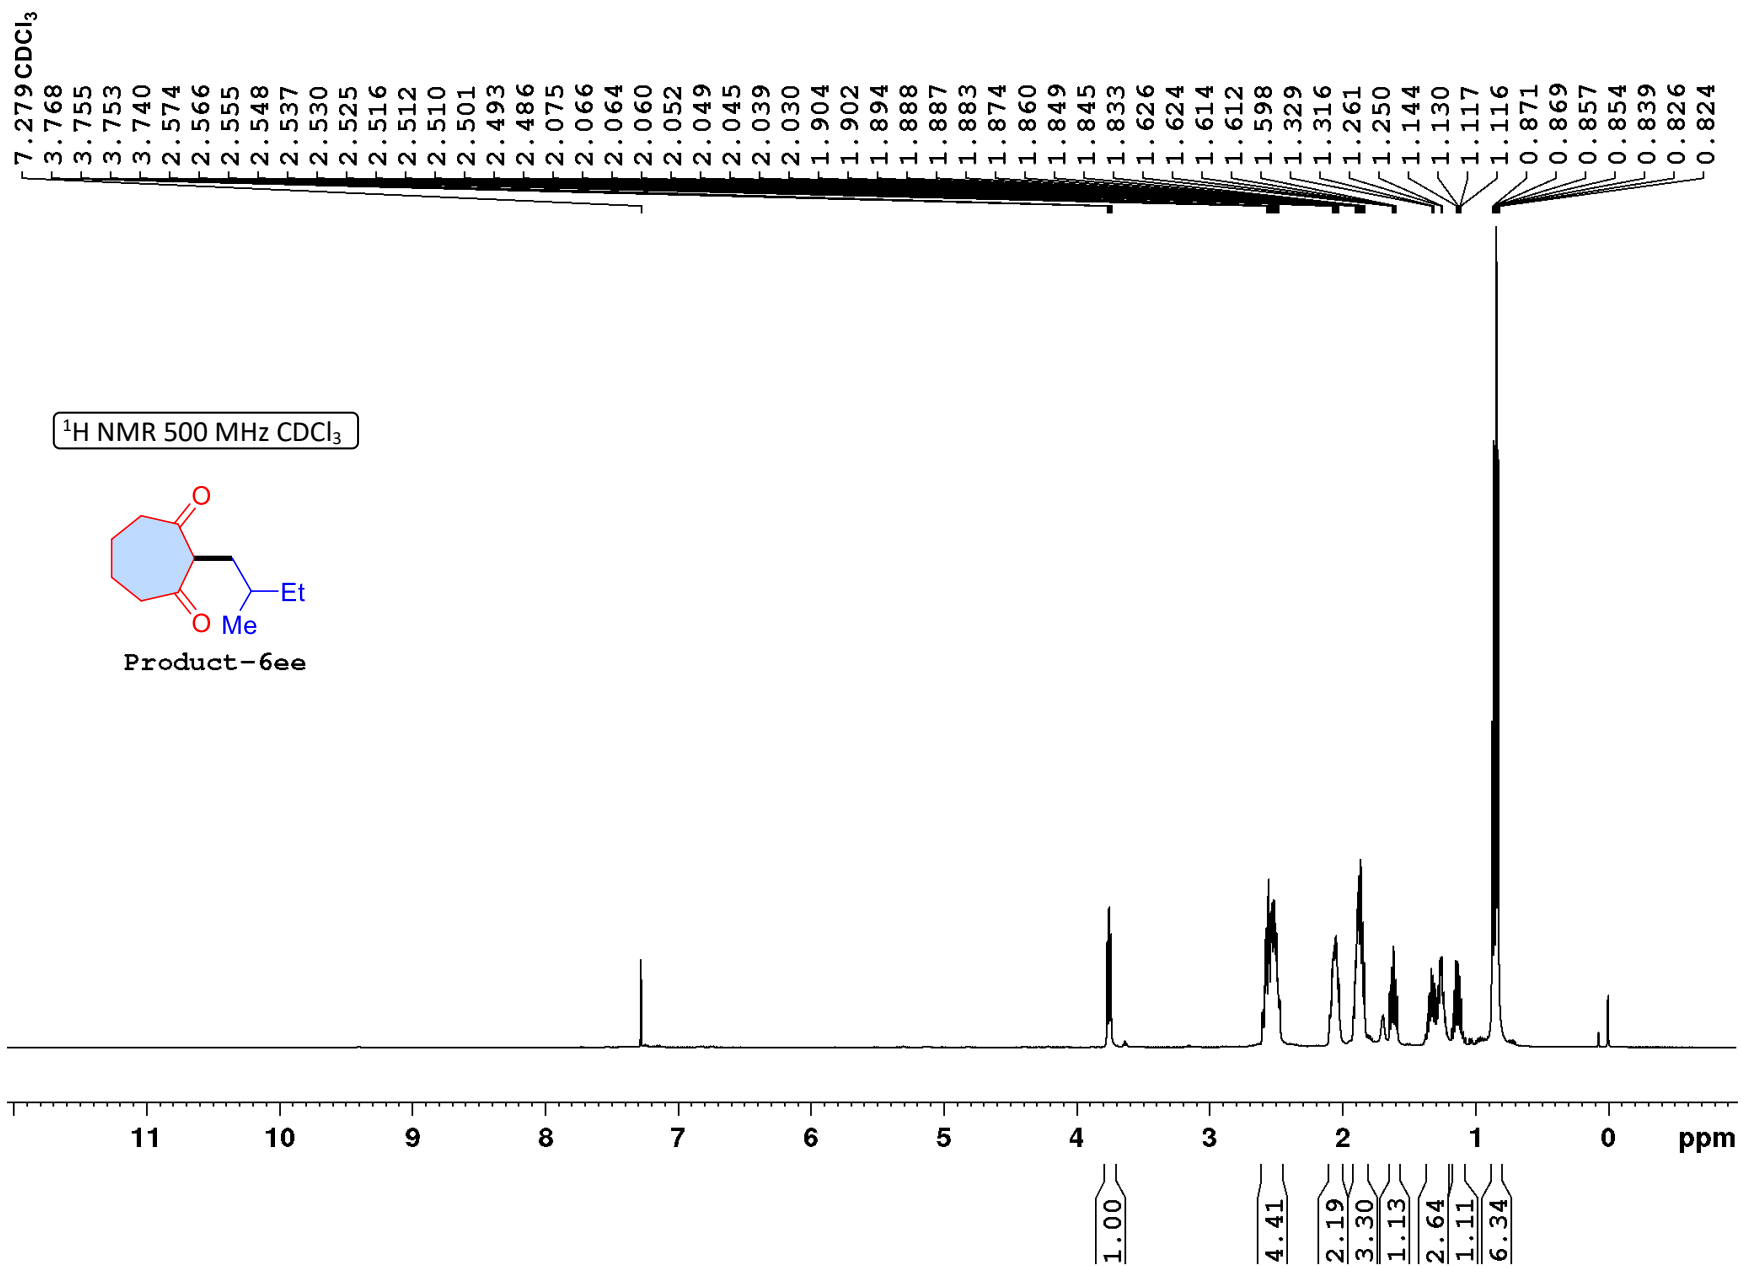

207.95  
207.80

77.31  
77.00 CDCl<sub>3</sub>  
76.68  
64.86

43.67  
43.54  
33.02  
32.03  
29.36  
26.06  
25.88  
18.91  
11.10

<sup>13</sup>C{<sup>1</sup>H} NMR 100 MHz CDCl<sub>3</sub>

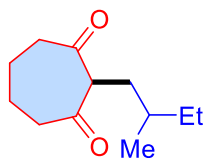

Product-6ee

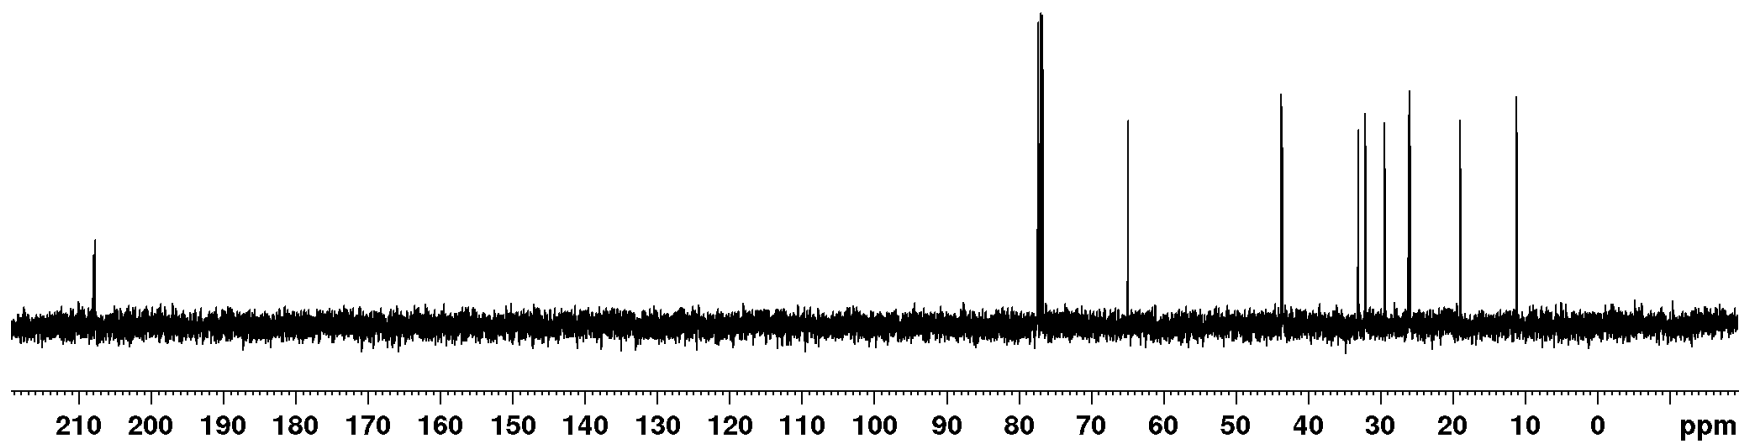

DEPT-135 100 MHz CDCl<sub>3</sub>

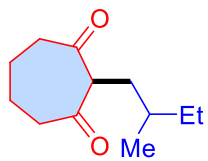

Product-6ee

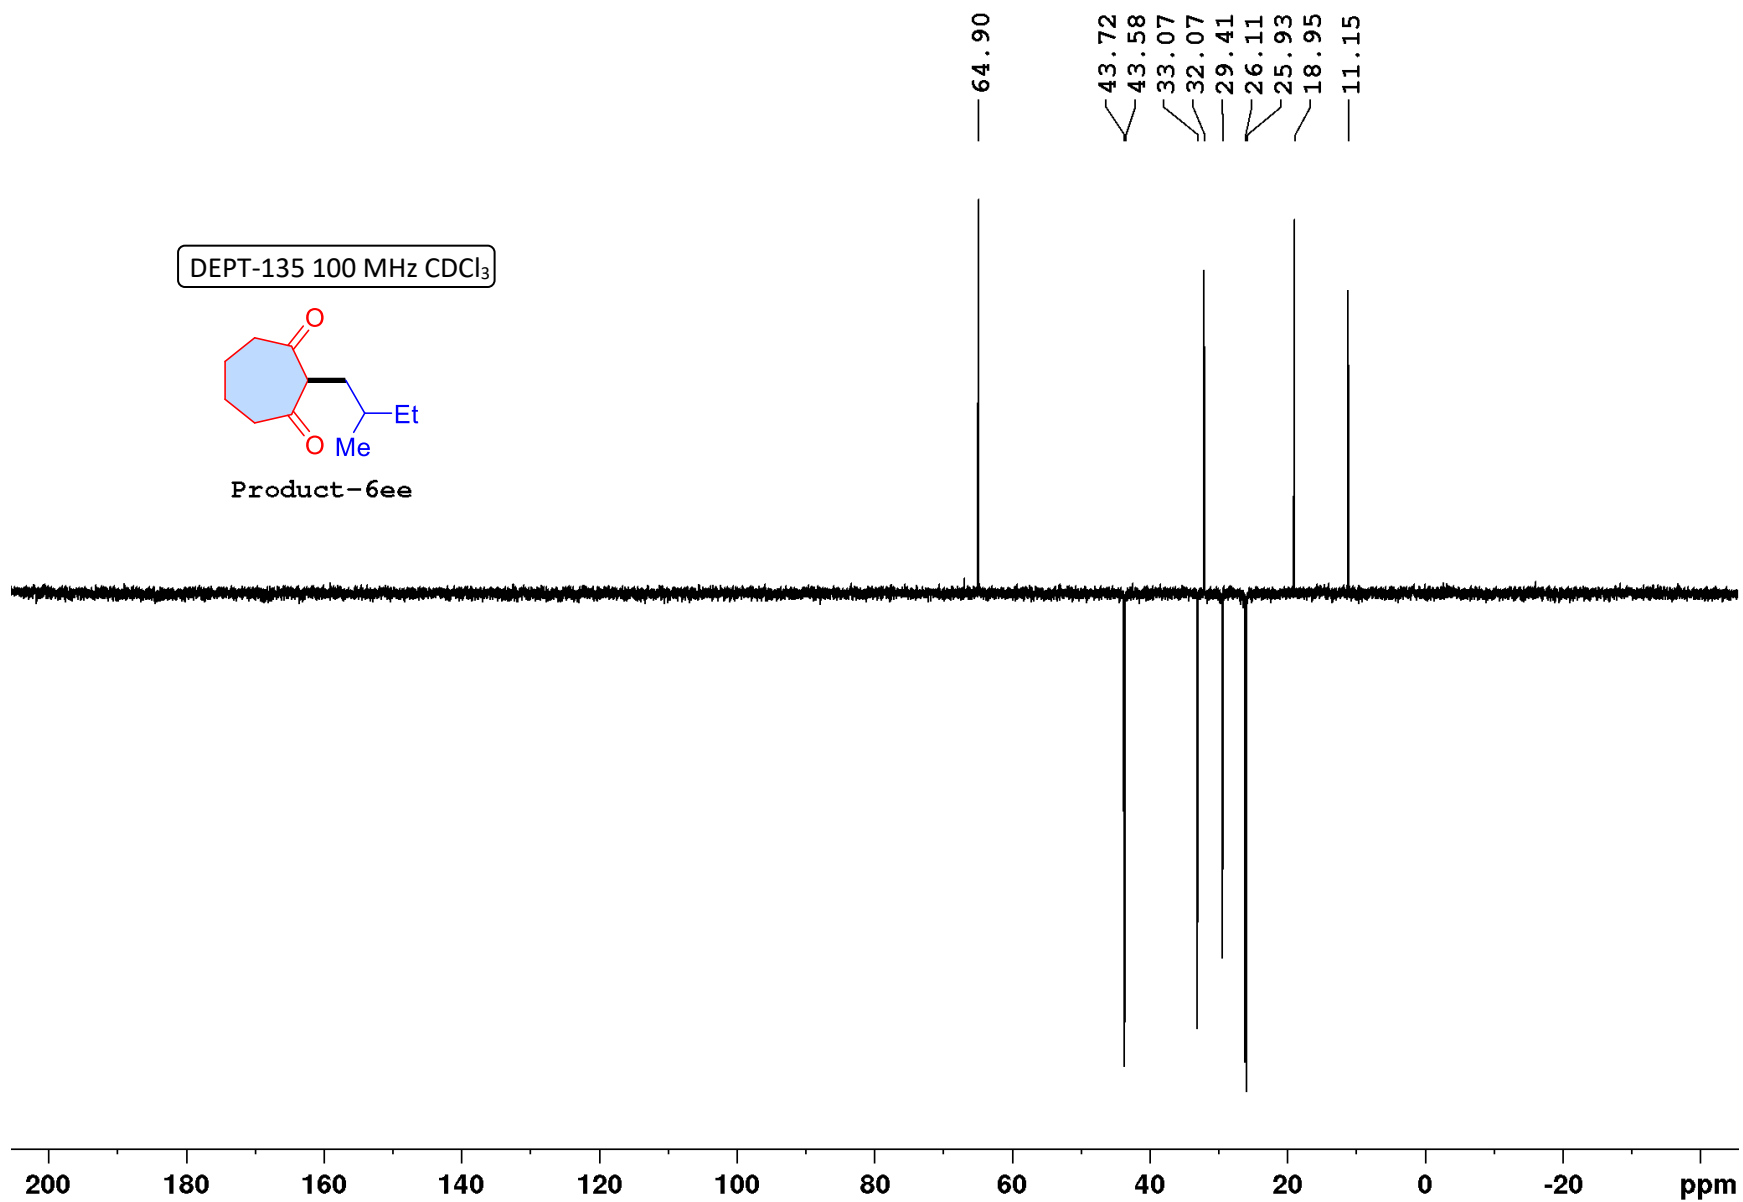



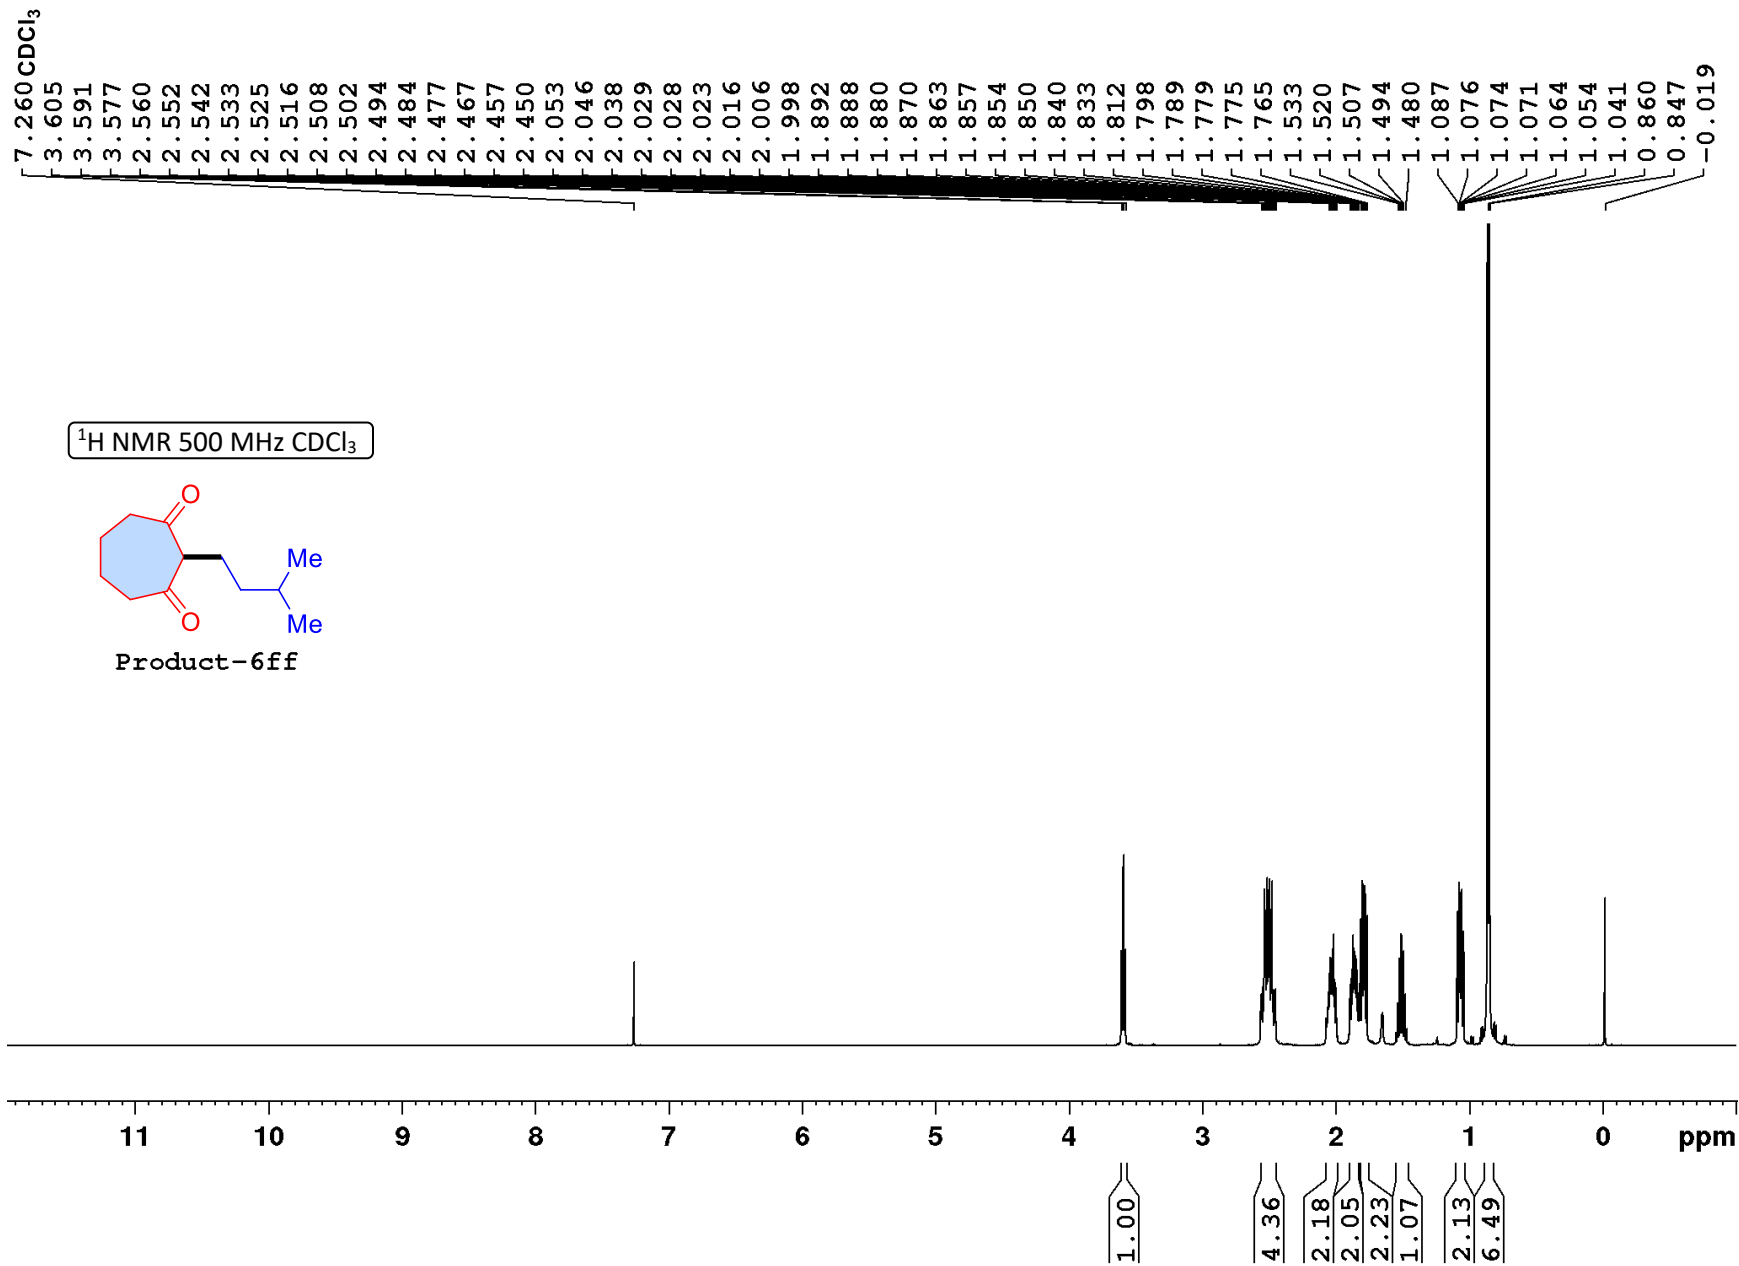

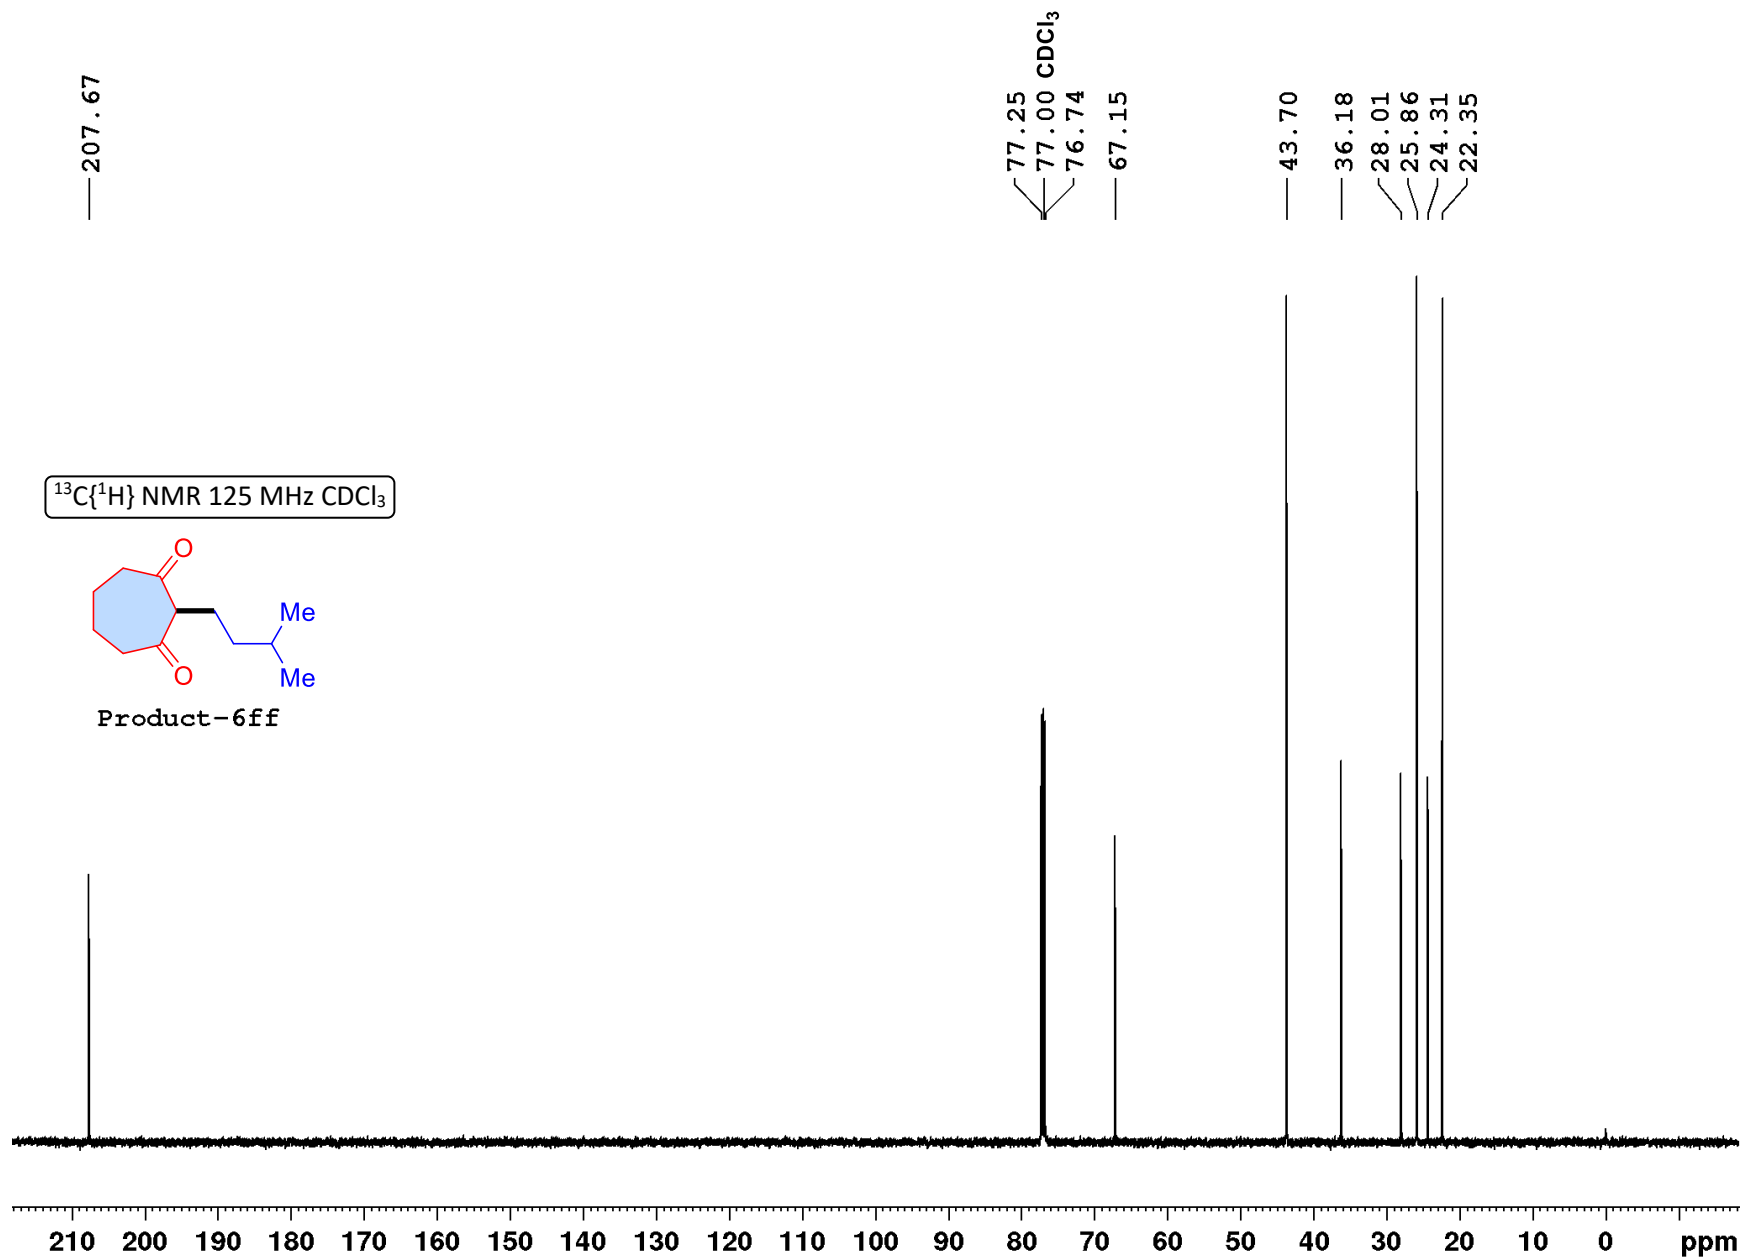

DEPT-135 125 MHz CDCl<sub>3</sub>

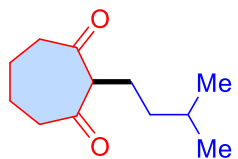

Product-6ff

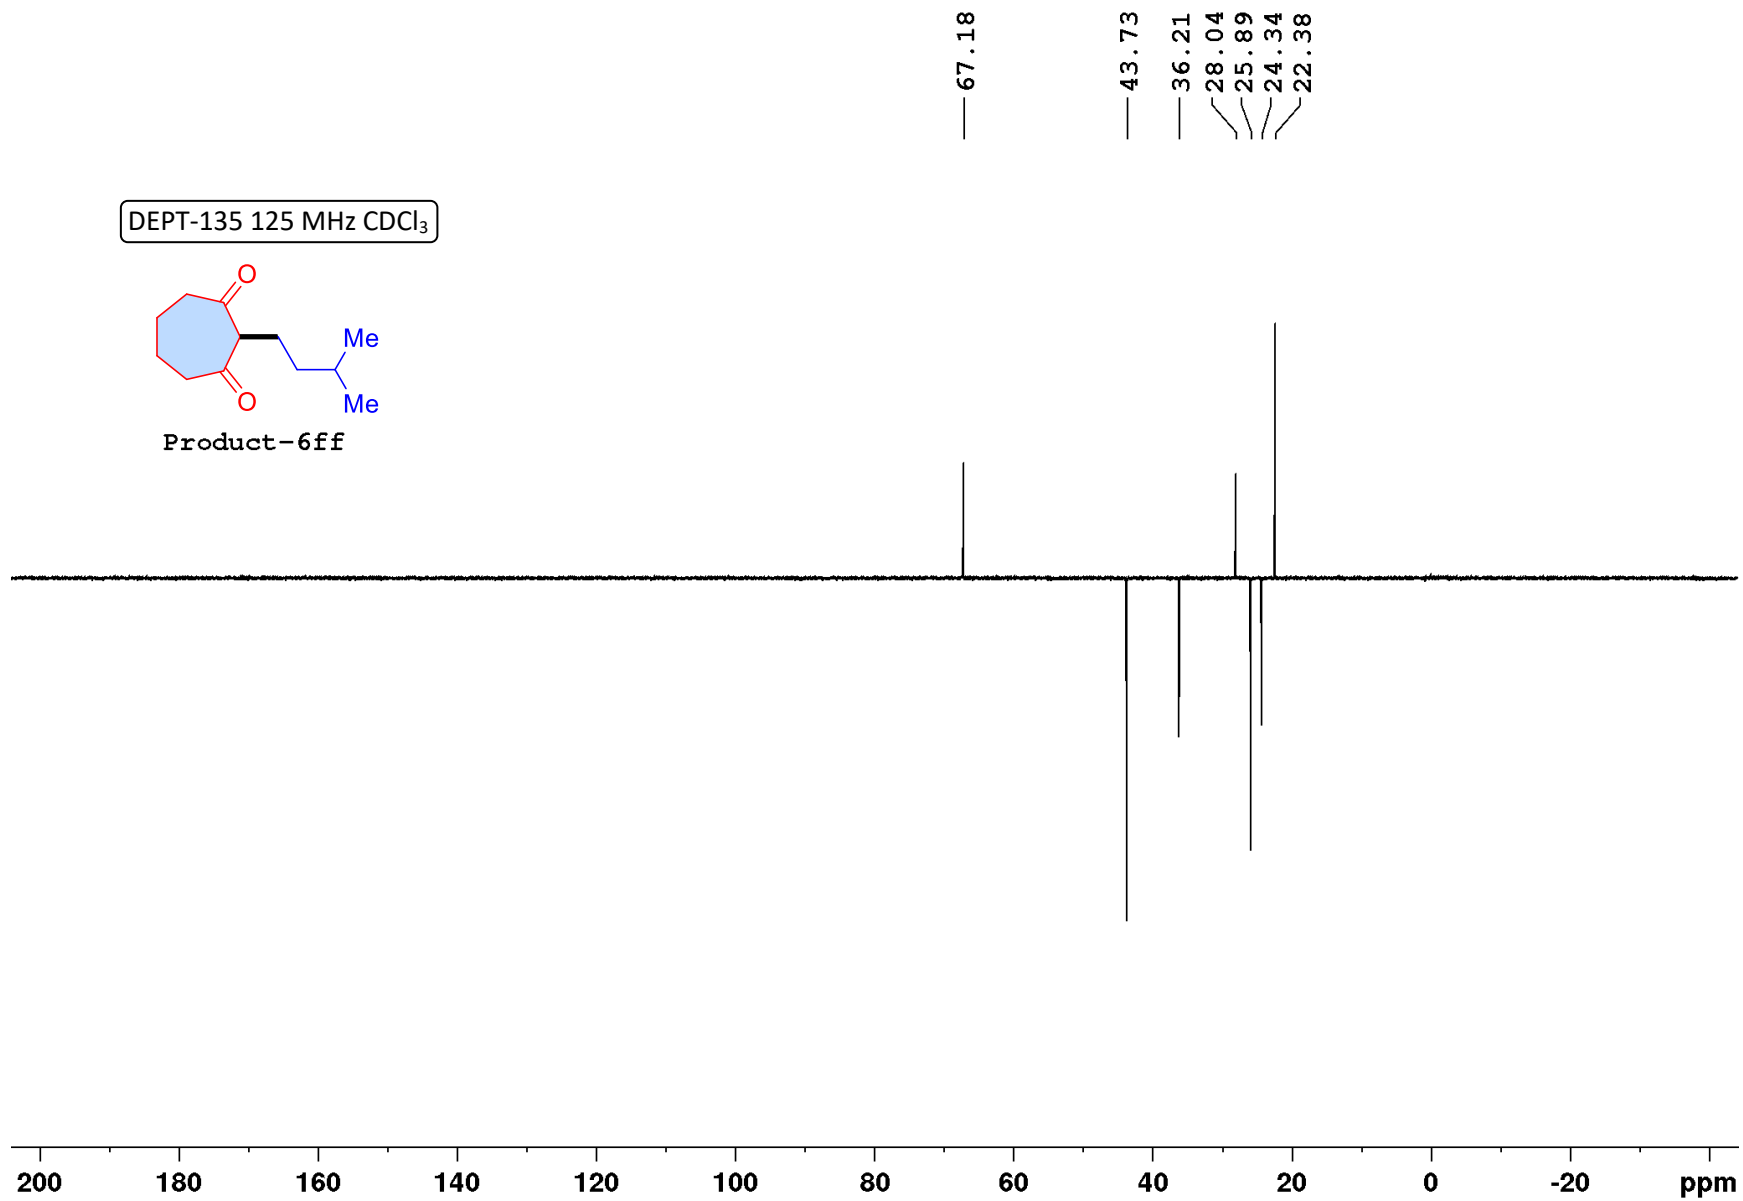

7.351  
7.348  
7.335  
7.326  
7.322  
7.291  
7.276  
7.265 CDCl<sub>3</sub>  
4.418  
4.095  
3.467  
3.463  
3.459  
3.455  
3.451  
3.448  
3.443  
3.439  
3.436  
2.573  
2.566  
2.561  
2.555  
2.552  
2.548  
2.485  
2.481  
2.477  
2.467  
2.463  
2.460  
2.154  
2.150  
2.142  
2.129  
2.121  
2.117  
2.113  
2.099  
2.095  
2.090  
2.087  
2.077  
2.074  
2.070  
2.067  
2.063  
1.846  
1.843  
1.839  
1.836  
1.832  
1.829  
1.827  
1.824  
1.822  
1.819  
1.815

<sup>1</sup>H NMR 500 MHz CDCl<sub>3</sub>

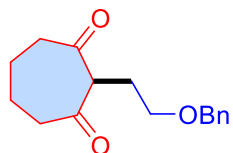

Product-6gg

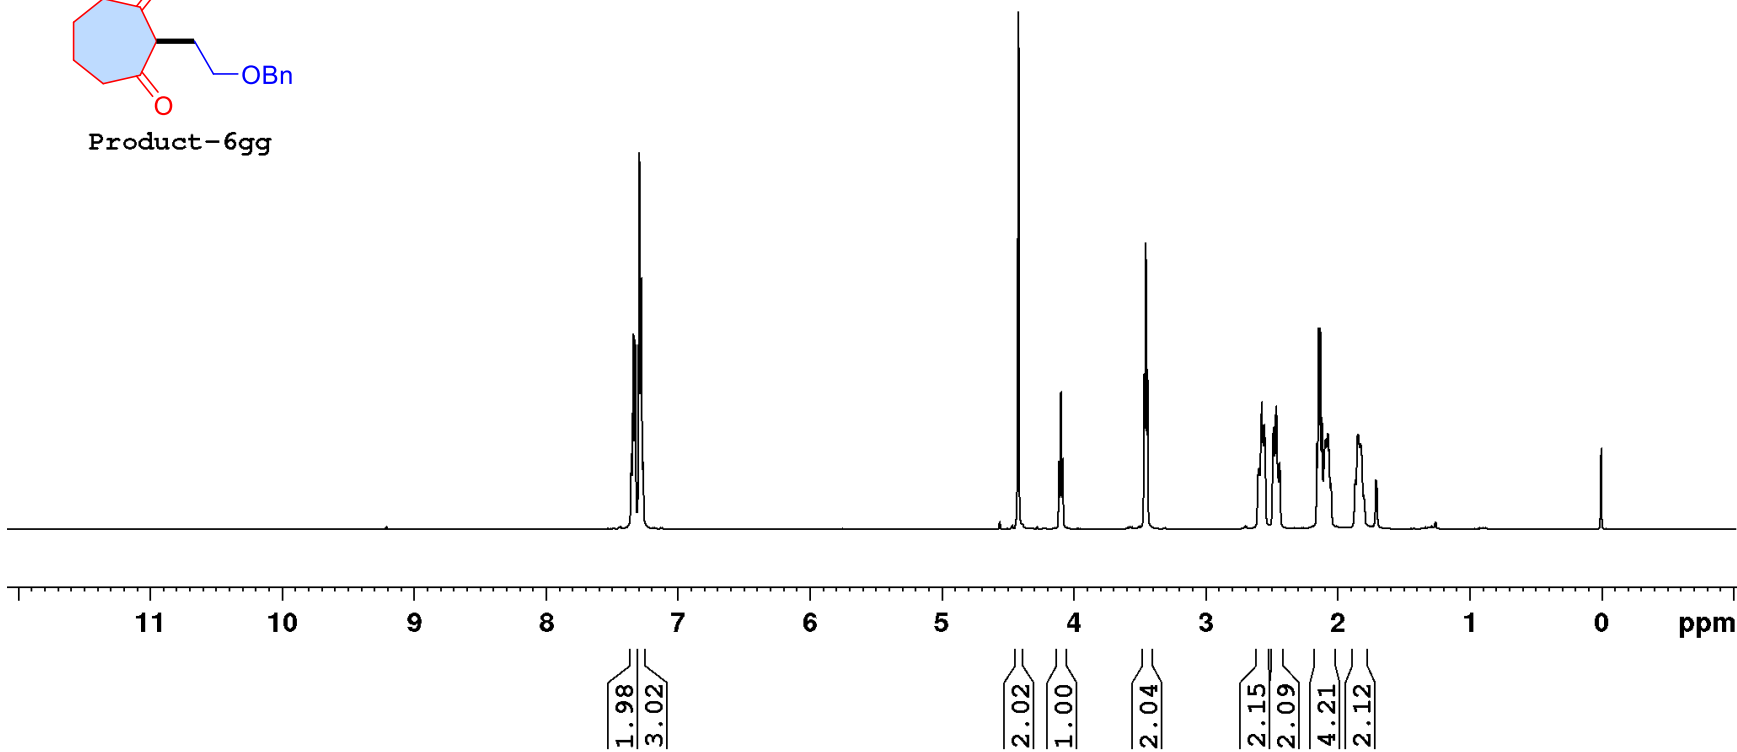

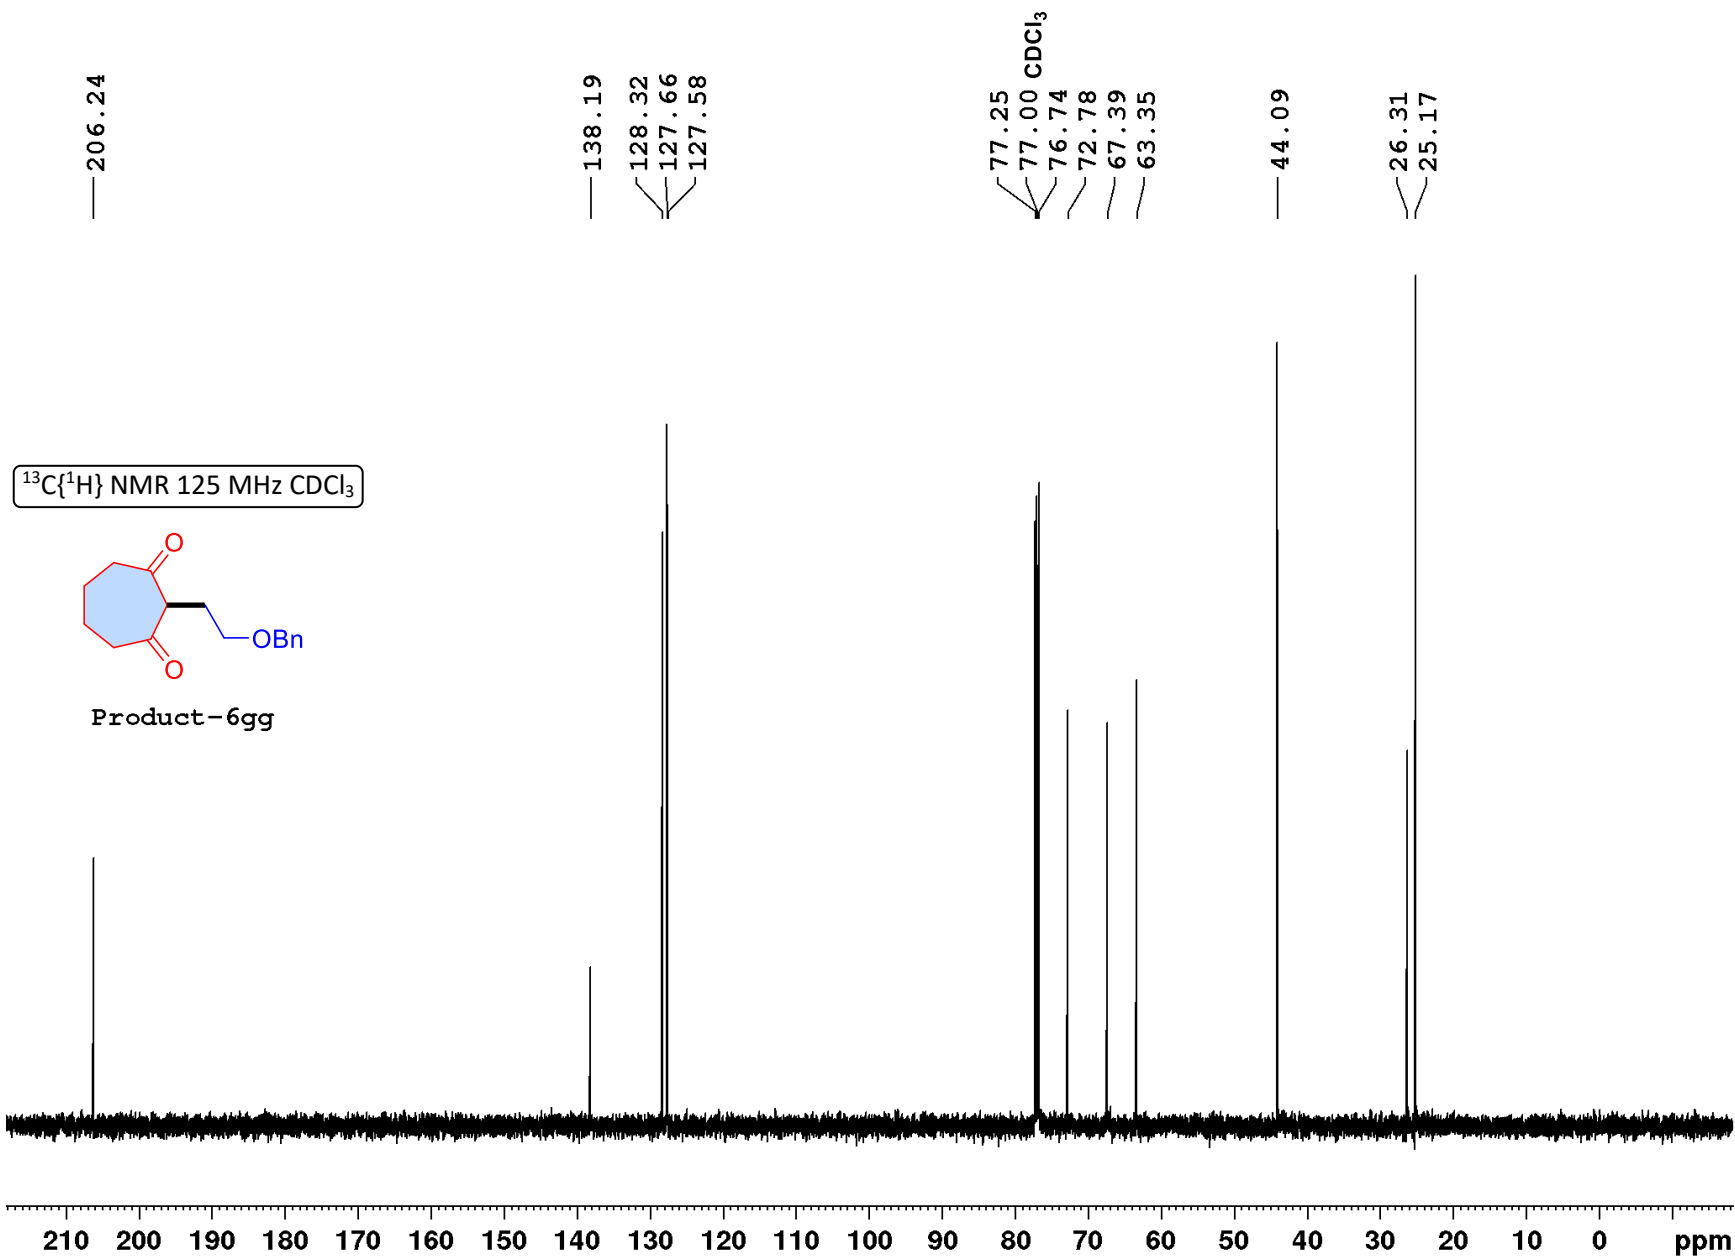

DEPT-135 125 MHz CDCl<sub>3</sub>

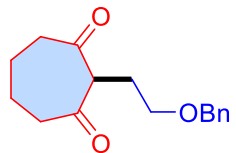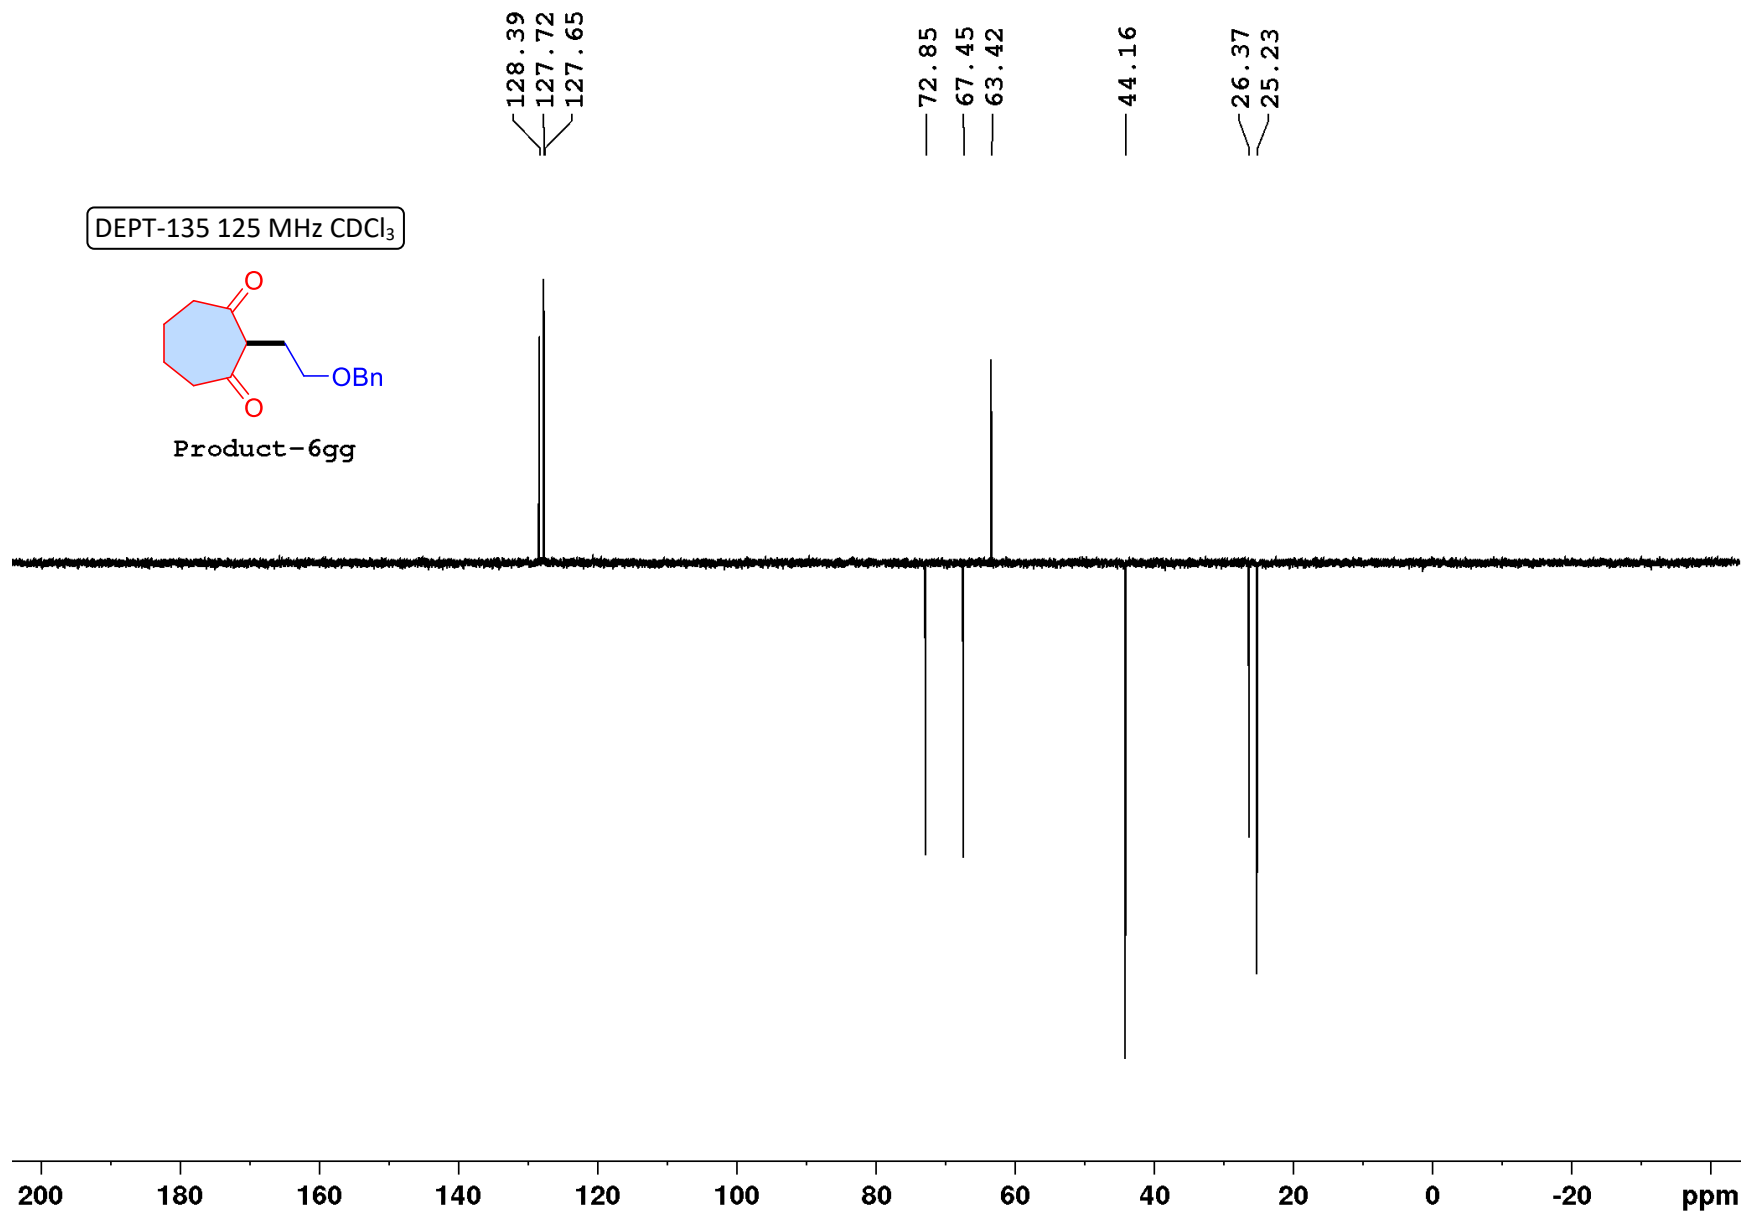

7.356  
7.344  
7.341  
7.339  
7.334  
7.328  
7.324  
7.312  
7.294  
7.290  
7.276  
7.265 CDCl<sub>3</sub>  
4.462  
3.839  
3.825  
3.811  
3.468  
3.456  
3.444  
2.545  
2.535  
2.527  
2.517  
2.509  
2.486  
2.479  
2.469  
2.461  
2.451  
2.434  
2.039  
2.030  
2.021  
2.015  
2.008  
1.998  
1.933  
1.919  
1.914  
1.907  
1.903  
1.889  
1.863  
1.856  
1.846  
1.839  
1.833  
1.824  
1.822  
1.815  
1.582  
1.569  
1.566  
1.563  
1.557  
1.554  
1.551  
1.539

<sup>1</sup>H NMR 500 MHz CDCl<sub>3</sub>

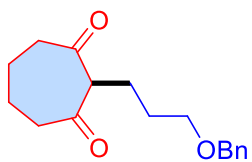

Product-6hh

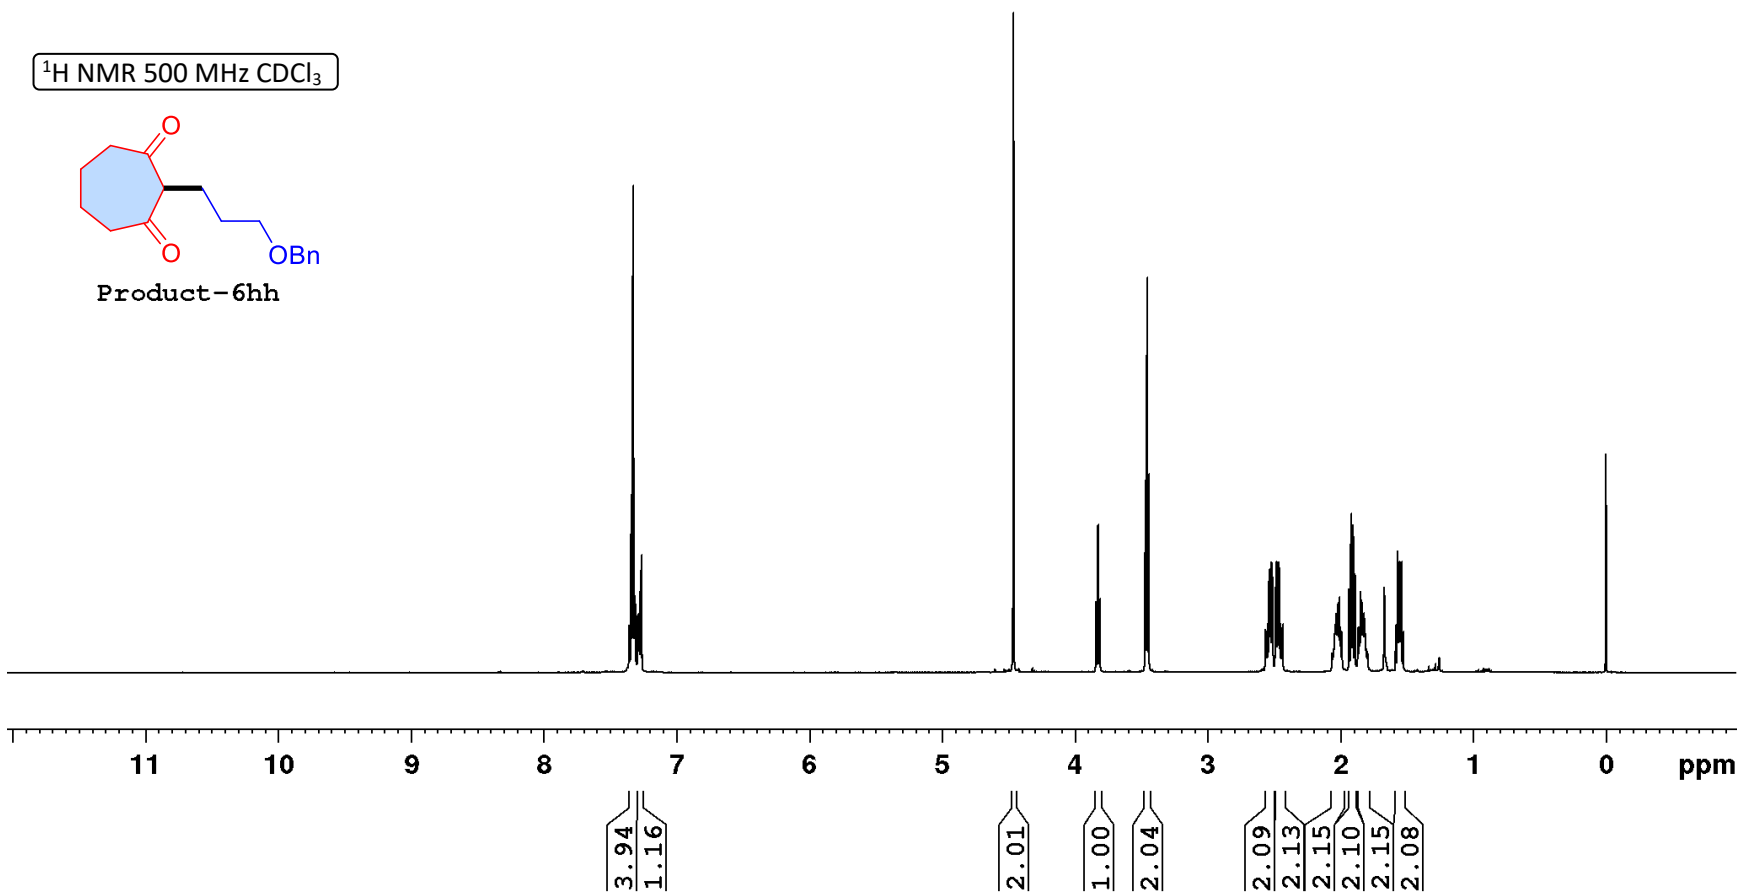

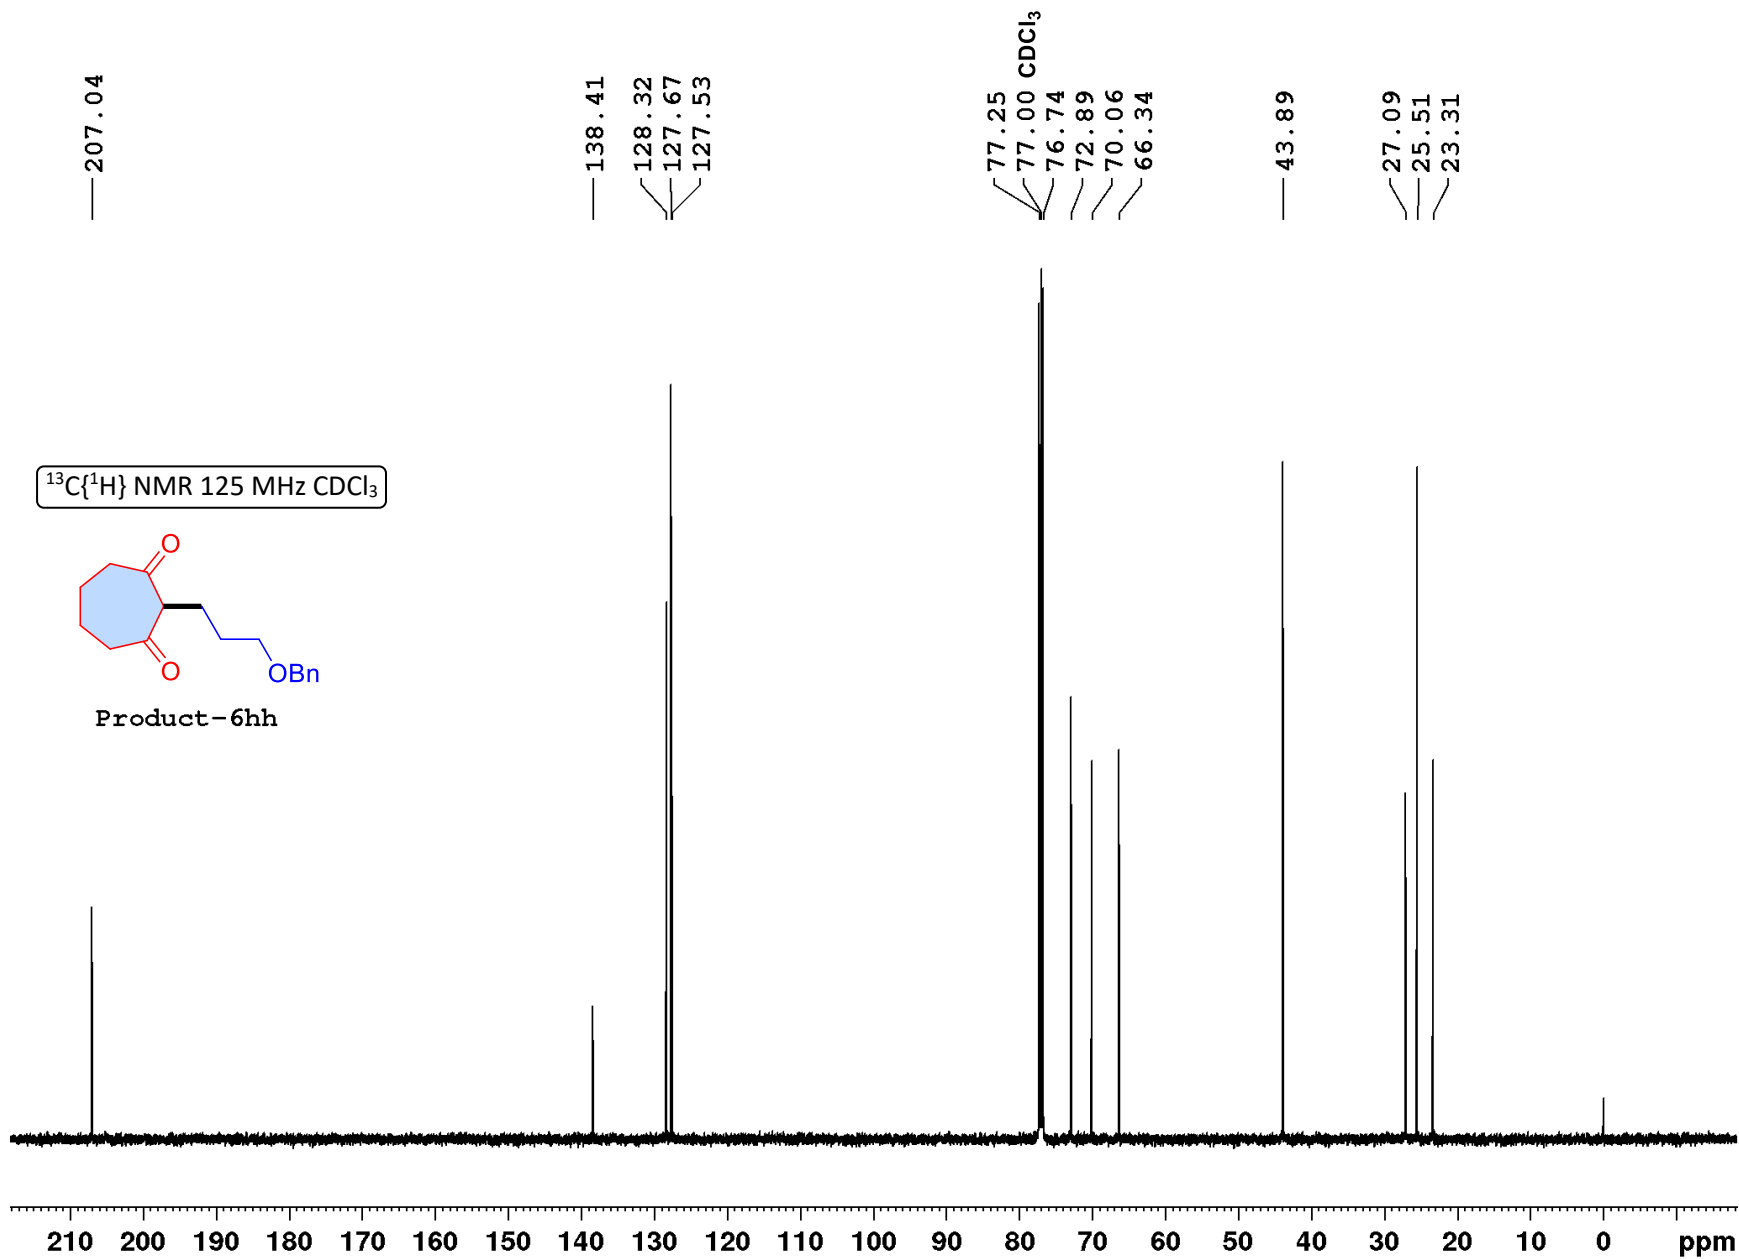



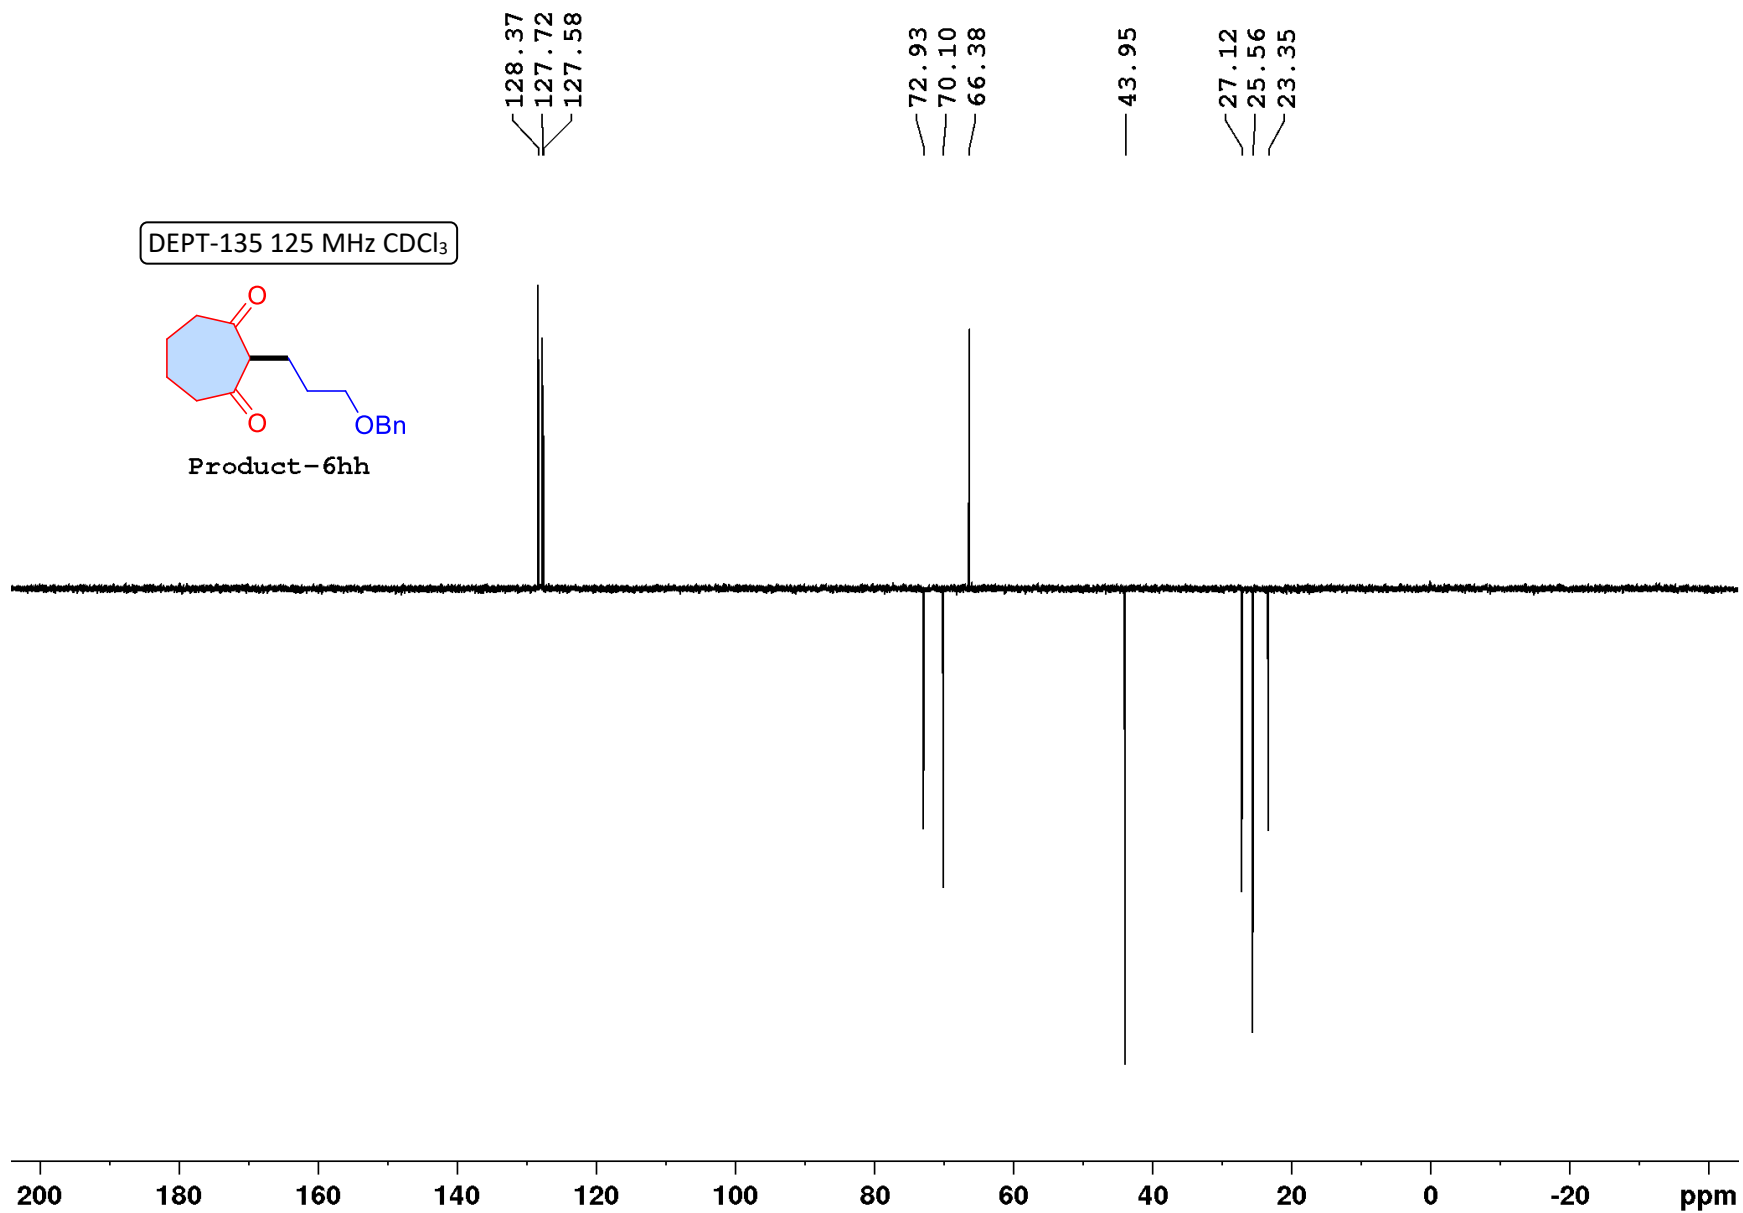

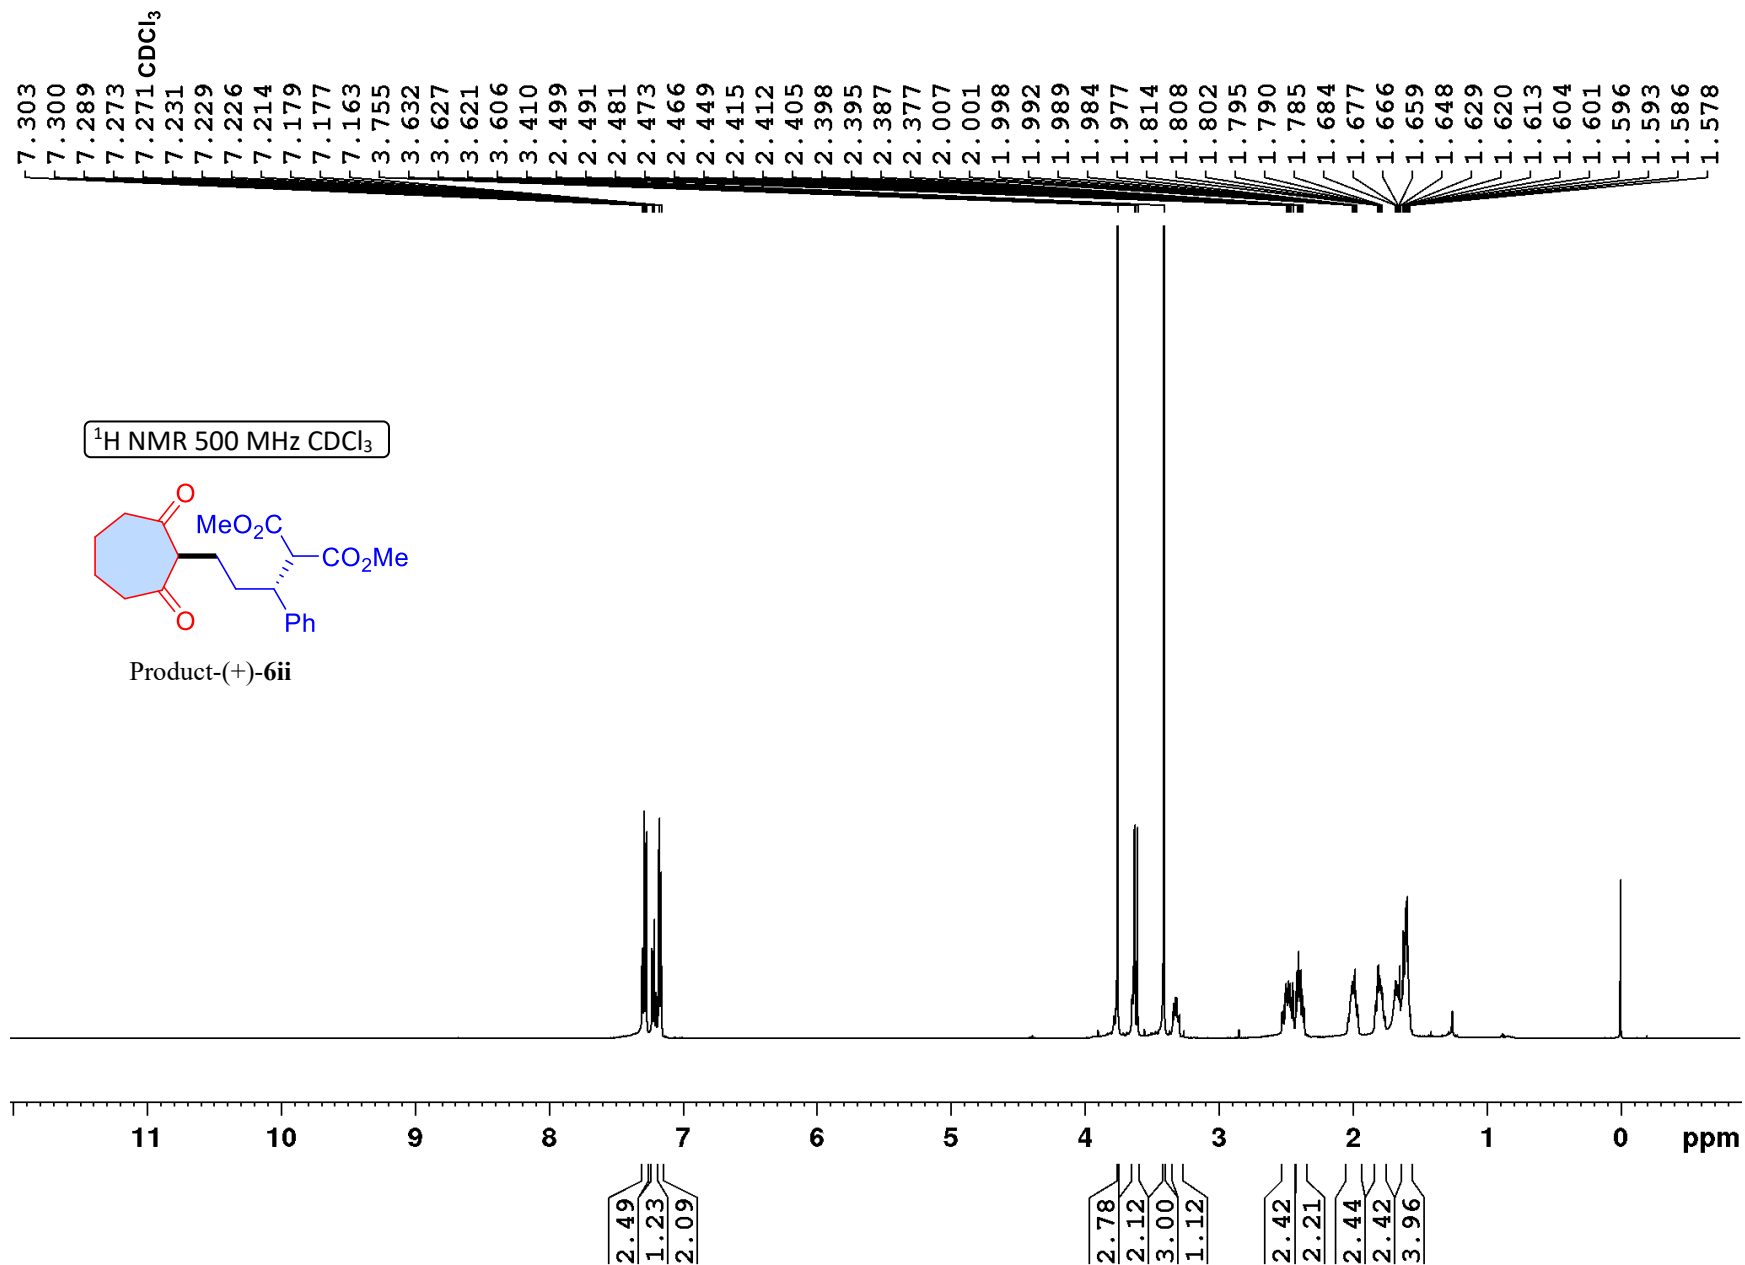

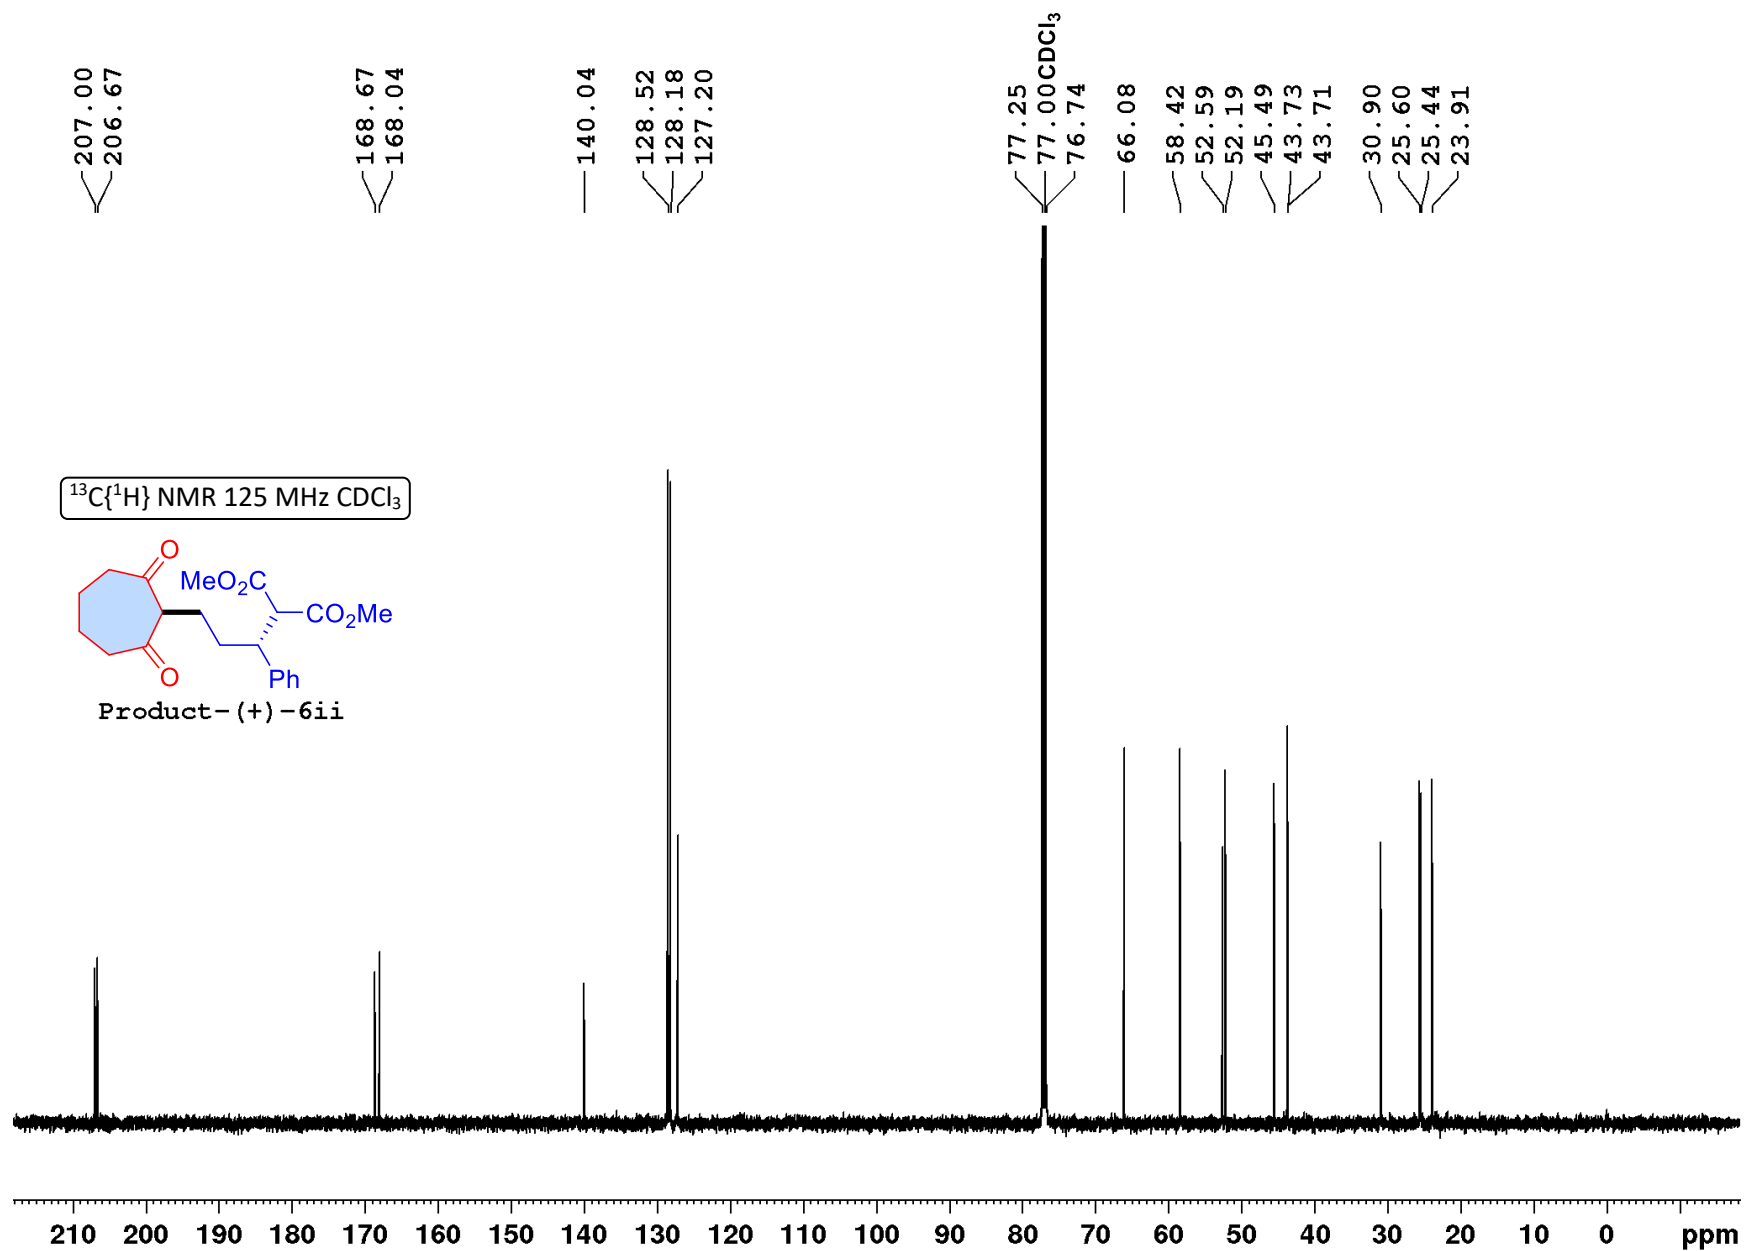

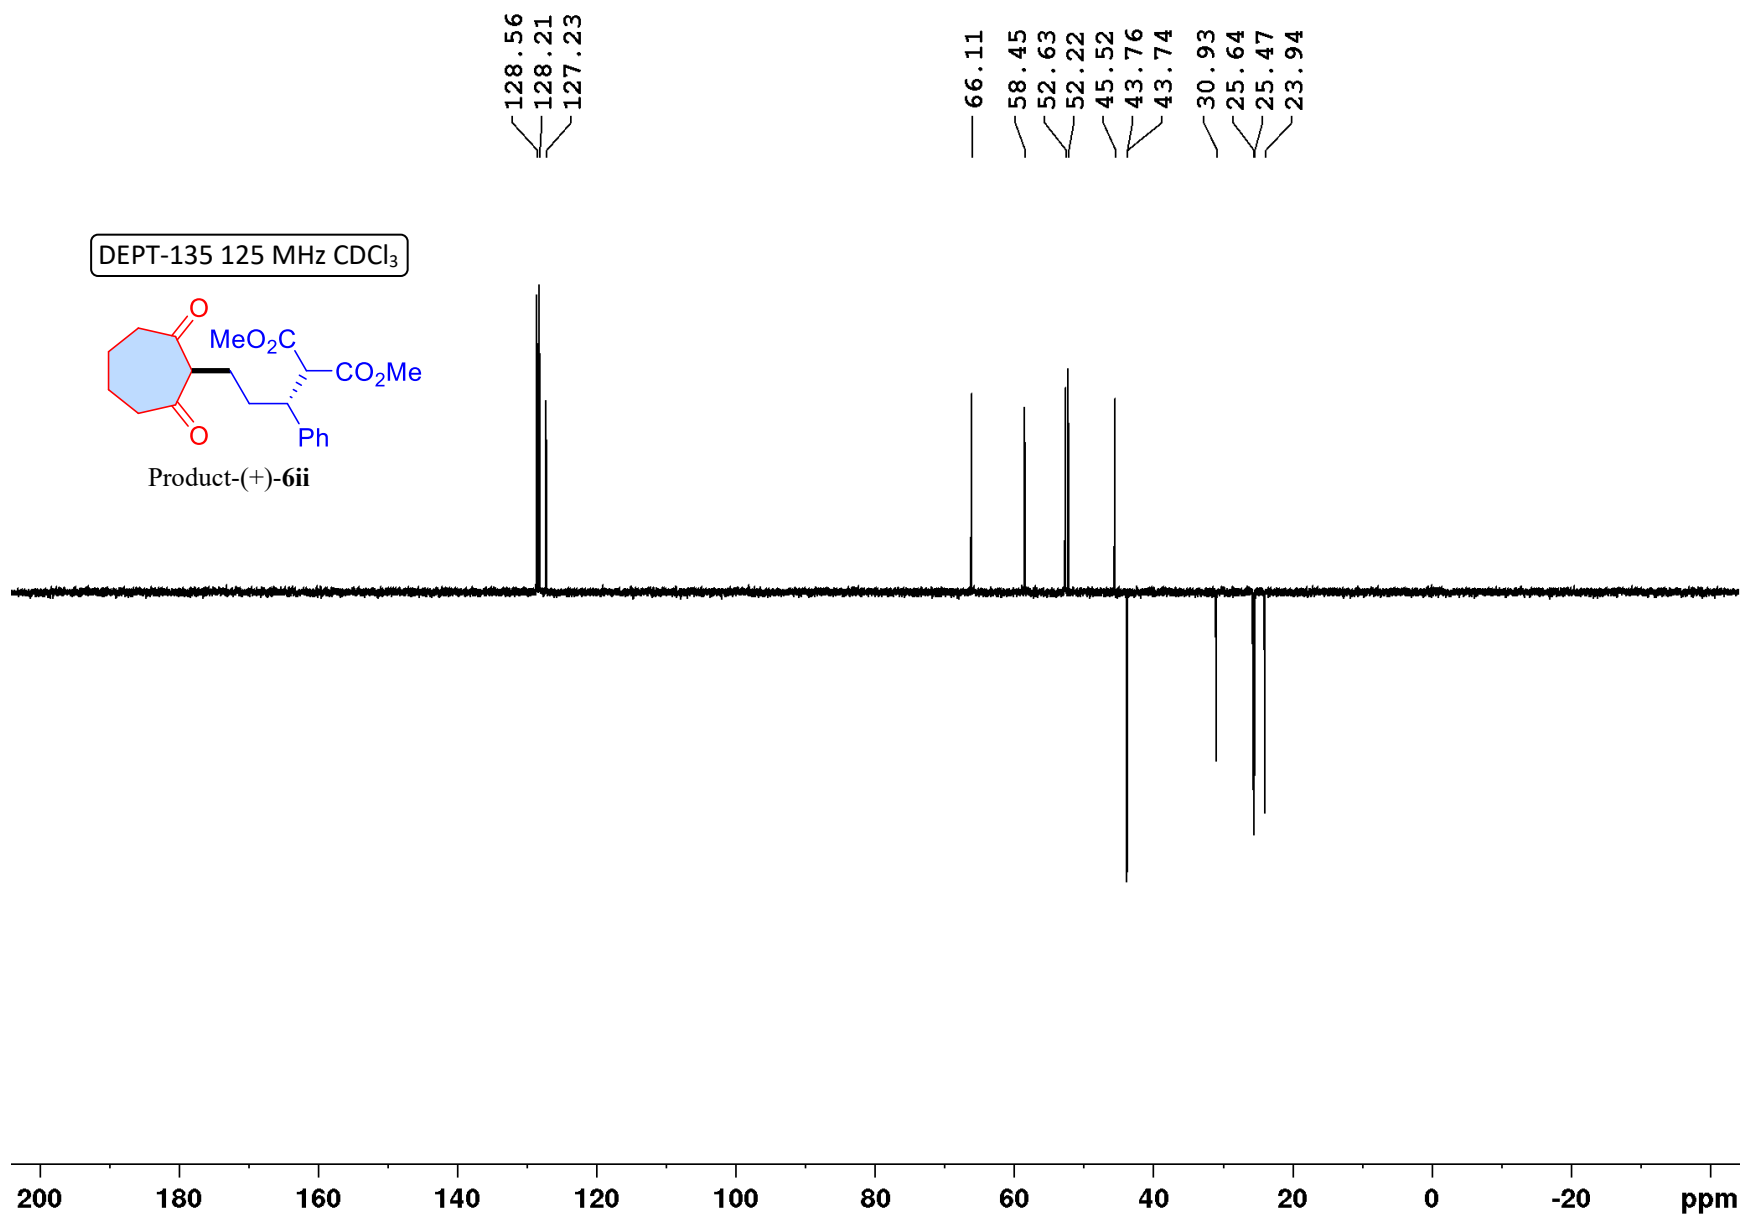

7.319  
7.316  
7.305  
7.290  
7.263 CDCl<sub>3</sub>  
7.253  
7.249  
7.199  
7.196  
7.182  
4.639  
4.615  
3.586  
3.579  
3.562  
3.177  
3.174  
2.779  
2.757  
2.655  
2.651  
2.630  
2.625  
2.582  
2.554  
2.293  
2.285  
2.267  
2.259  
2.085  
2.080  
2.058  
2.053  
2.012  
1.879  
1.862  
1.850  
1.789  
1.787  
1.779  
1.770  
1.767  
1.748  
1.744  
1.734  
1.728  
1.720  
1.715  
1.706  
1.699  
1.686  
1.677  
1.660  
1.652  
1.643  
1.633  
1.629  
1.626

<sup>1</sup>H NMR 500 MHz CDCl<sub>3</sub>

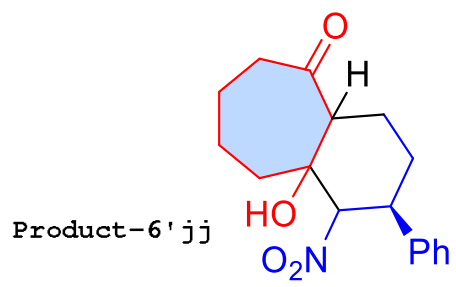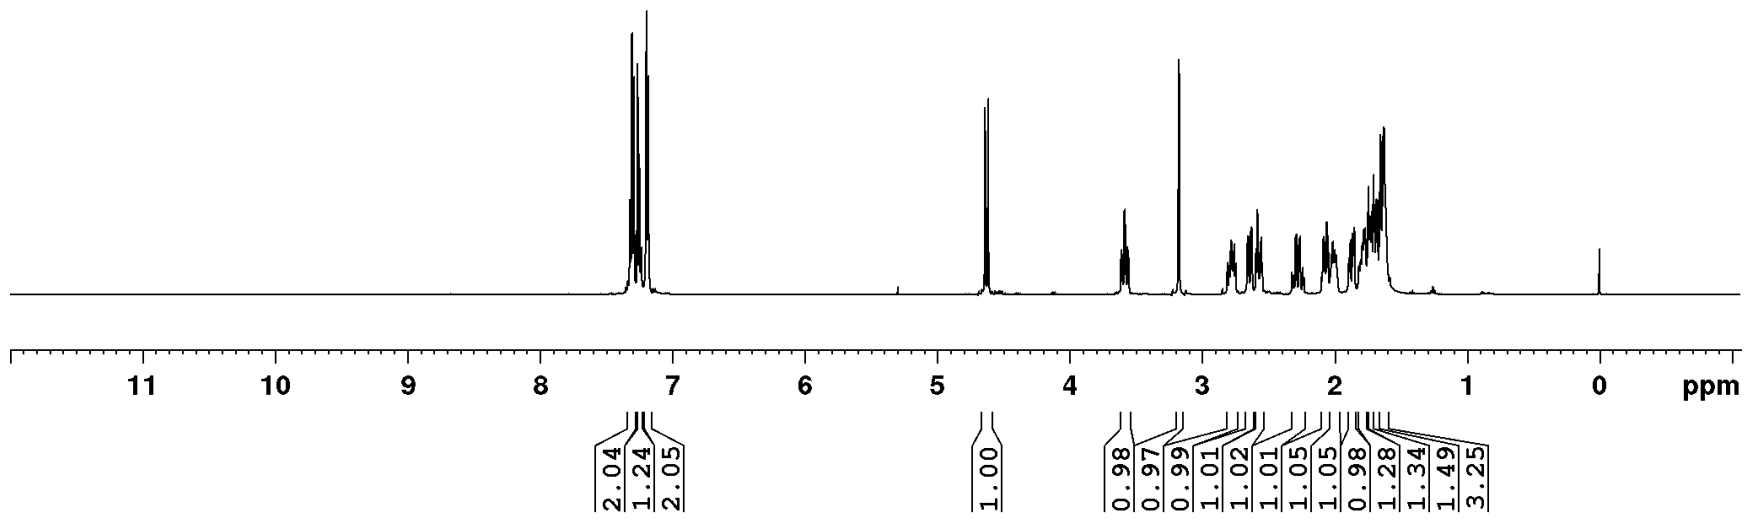

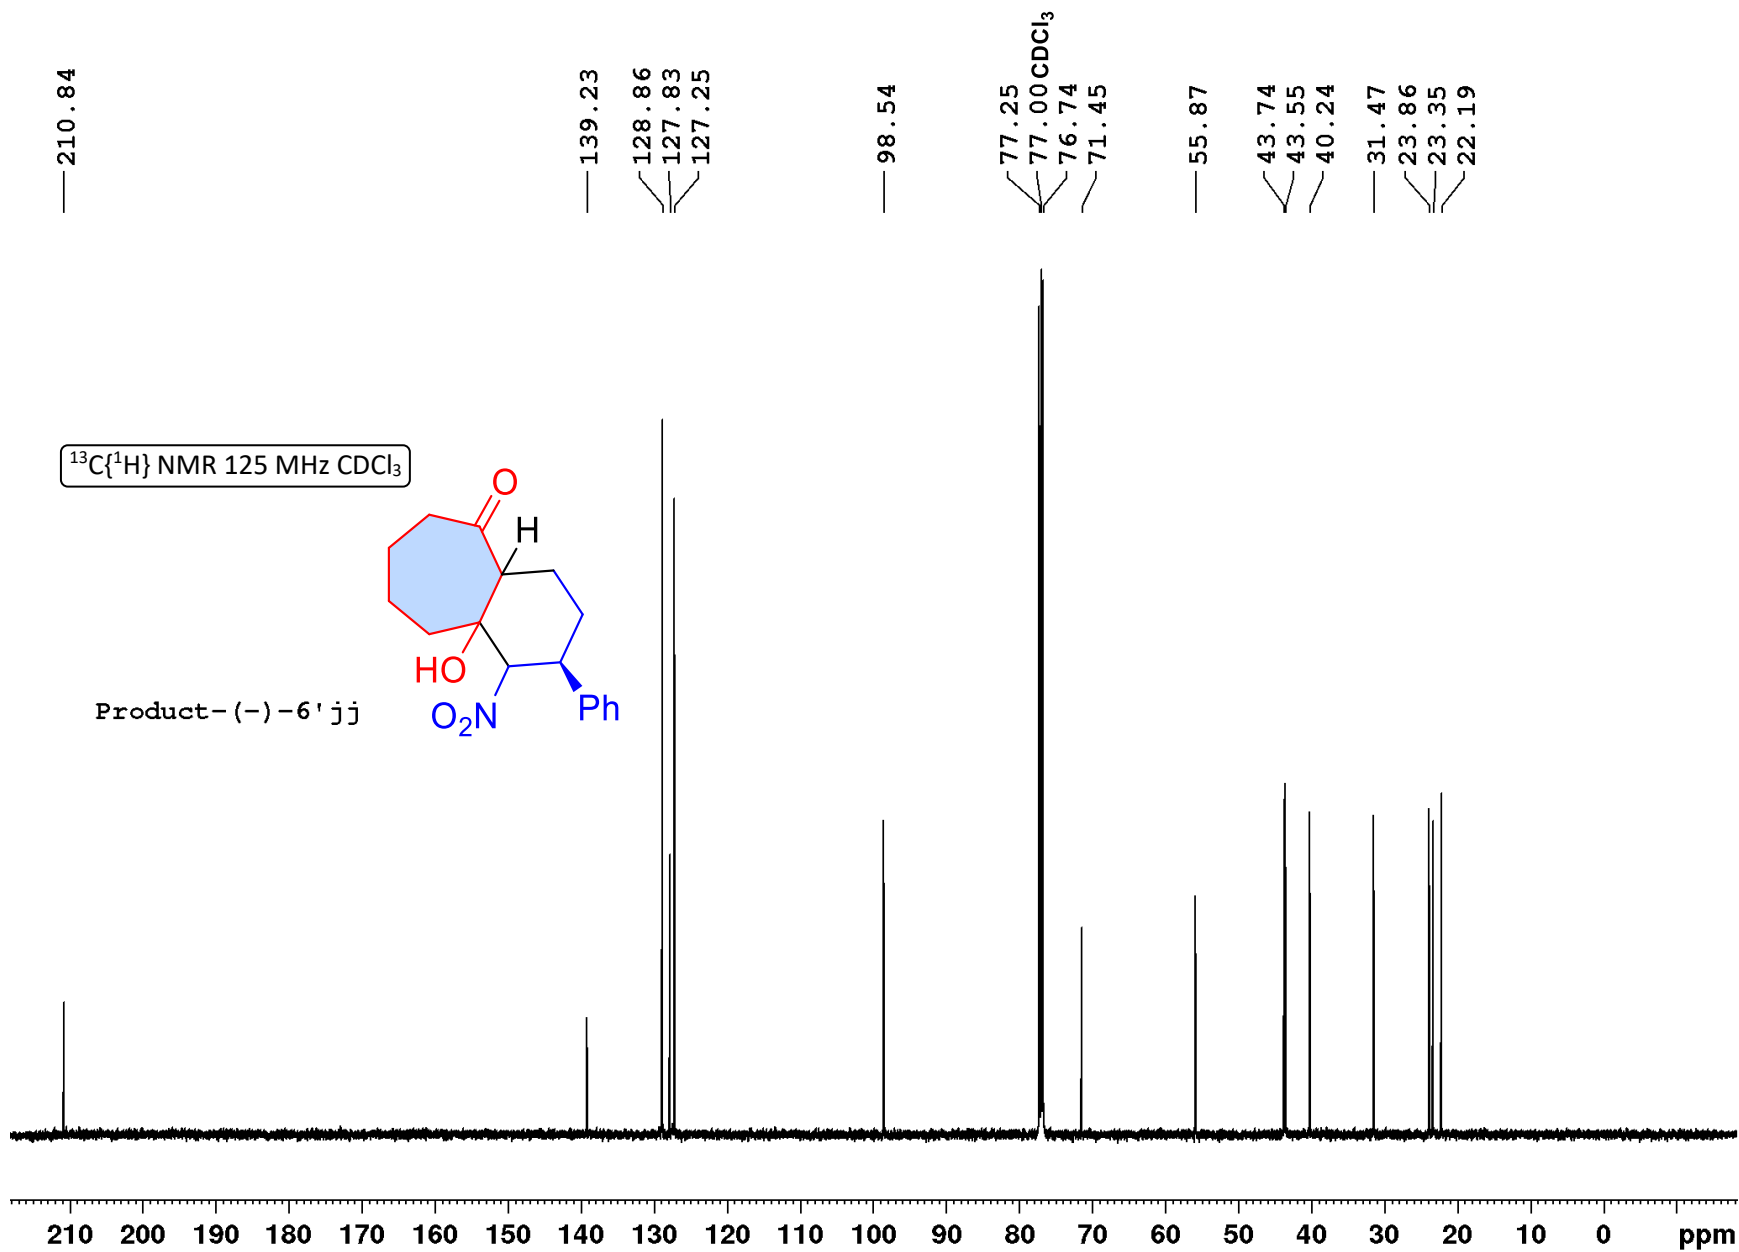

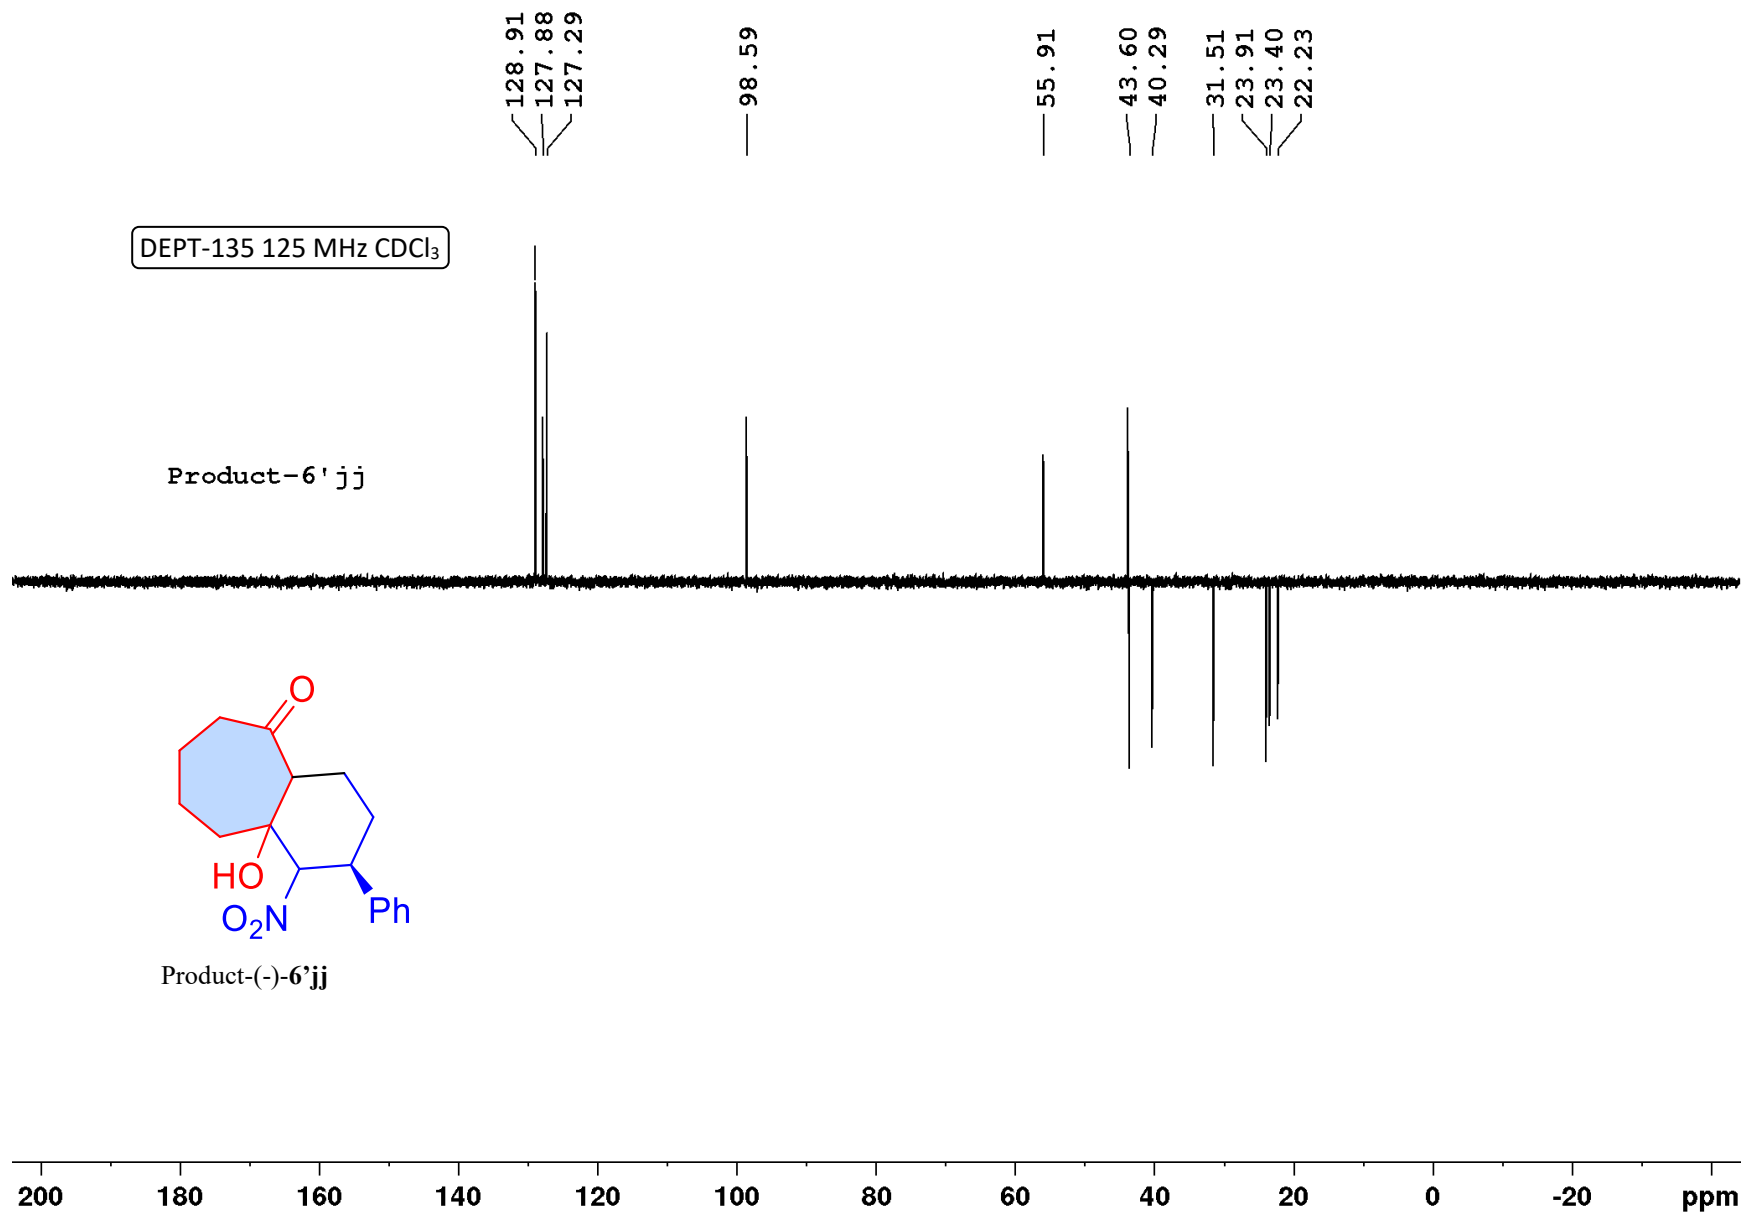

CDCl<sub>3</sub>

7.260  
4.155  
4.145  
4.138  
4.128  
4.008  
4.000  
3.996  
3.992  
3.987  
3.980  
3.976  
3.498  
3.488  
3.485  
3.479  
3.477  
3.471  
3.467  
3.458  
2.678  
2.669  
2.661  
2.652  
2.641  
2.632  
2.623  
2.616  
2.521  
2.513  
2.504  
2.495  
2.486  
2.476  
2.468  
2.458  
2.447  
2.440  
2.214  
2.208  
2.198  
2.191  
2.186  
2.179  
2.169  
2.163  
2.142  
2.133  
2.123  
2.114  
2.109  
2.100  
2.097  
2.090  
2.083  
2.080  
1.887  
1.878  
1.870  
1.867  
1.862  
1.860  
1.855  
1.849  
1.845  
1.841  
1.837  
1.831  
1.825  
1.820  
1.812  
1.807  
1.532  
1.490

<sup>1</sup>H NMR 500 MHz CDCl<sub>3</sub>

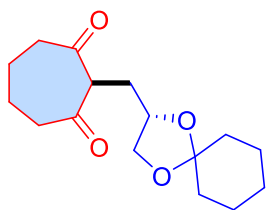

Product-(+)-**6kk**

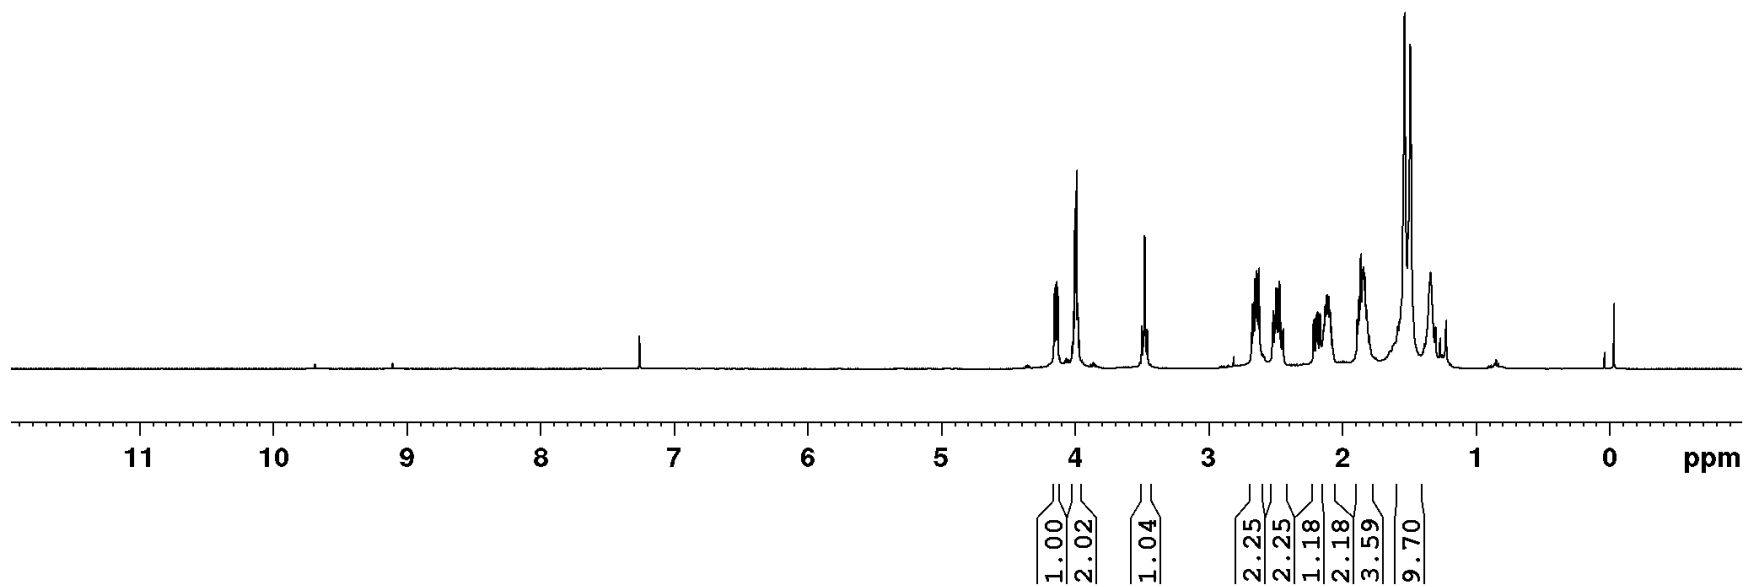



205.87  
205.77

109.54

77.25  
77.00 CDCl<sub>3</sub>  
76.74  
73.05  
68.97  
63.13

44.37  
43.96  
36.52  
34.97  
30.25  
25.11  
25.08  
25.01  
23.96  
23.79

<sup>13</sup>C{<sup>1</sup>H} NMR 125 MHz CDCl<sub>3</sub>

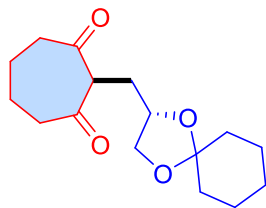

Product-(+)-6kk

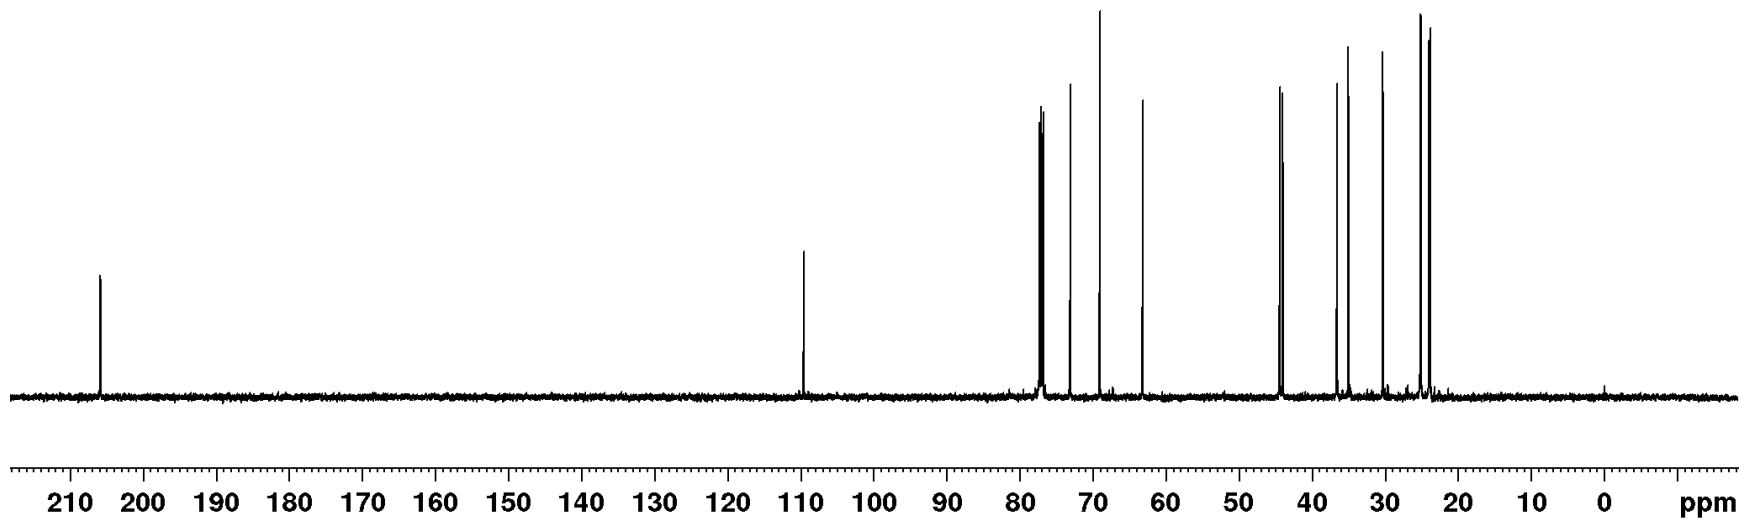

DEPT-135 125 MHz CDCl<sub>3</sub>

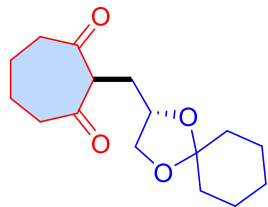

Product-(+)-6kk

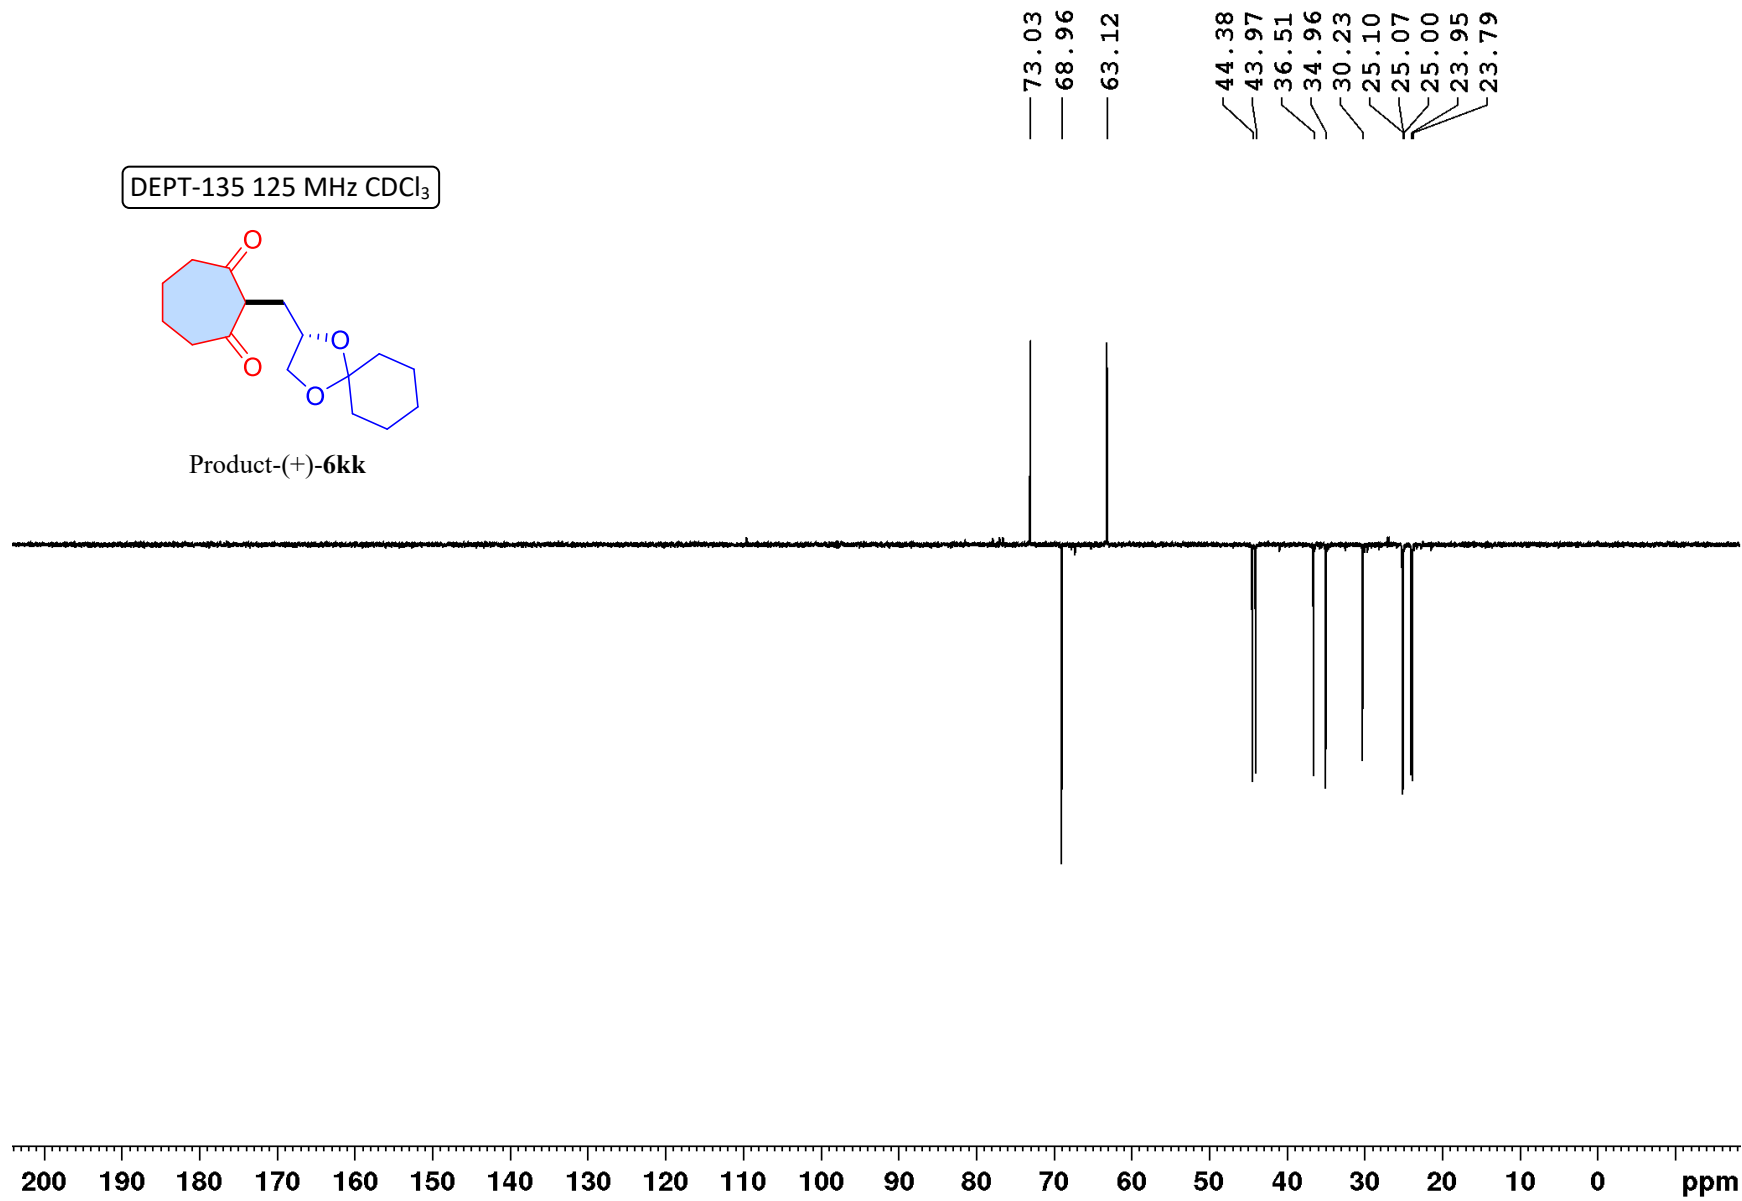

7.260 CDCl<sub>3</sub>

4.264  
4.255  
4.245  
4.236  
3.797  
3.790  
3.776  
3.488  
3.466  
3.444  
3.404  
3.397  
3.381  
3.375  
3.221  
3.163  
2.630  
2.620  
2.610  
2.606  
2.601  
2.592  
2.584  
2.576  
2.509  
2.500  
2.492  
2.485  
2.481  
2.473  
2.466  
2.114  
2.107  
2.098  
2.089  
2.081  
2.066  
2.060  
2.048  
2.041  
2.038  
2.031  
2.019  
2.012  
1.846  
1.841  
1.835  
1.828  
1.820  
1.810  
1.735  
1.726  
1.715  
1.706  
1.697  
1.231  
1.225

<sup>1</sup>H NMR 500 MHz CDCl<sub>3</sub>

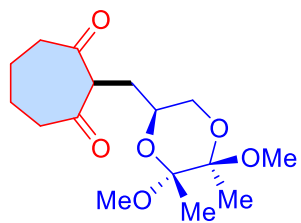

Product(-)-6II

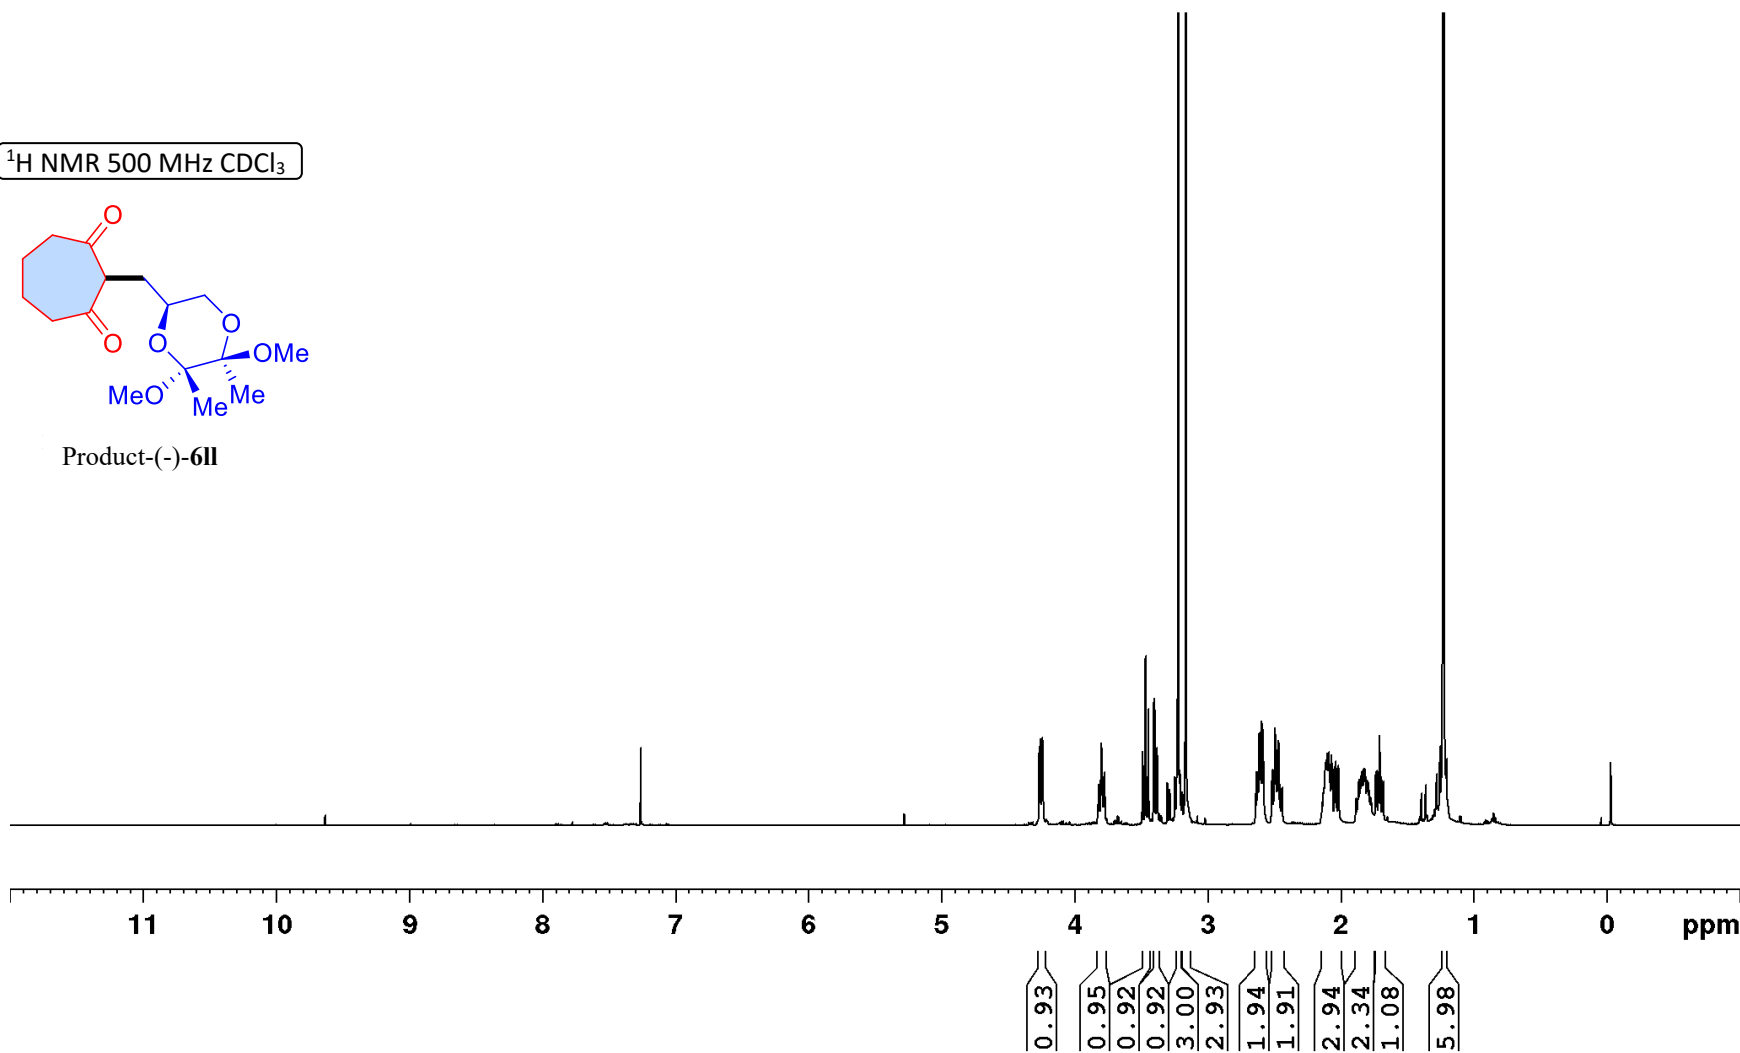

205.57  
205.47

99.03  
97.94

77.25  
77.00  
76.74  
CDCl<sub>3</sub>

64.46  
63.41  
61.91

47.95  
47.92  
44.41  
43.81

27.32  
25.25  
24.95  
17.78  
17.48

<sup>13</sup>C{<sup>1</sup>H} NMR 125 MHz CDCl<sub>3</sub>

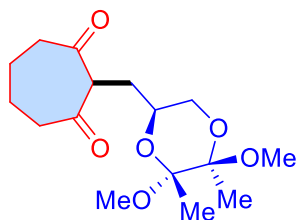

Product(-)-6II

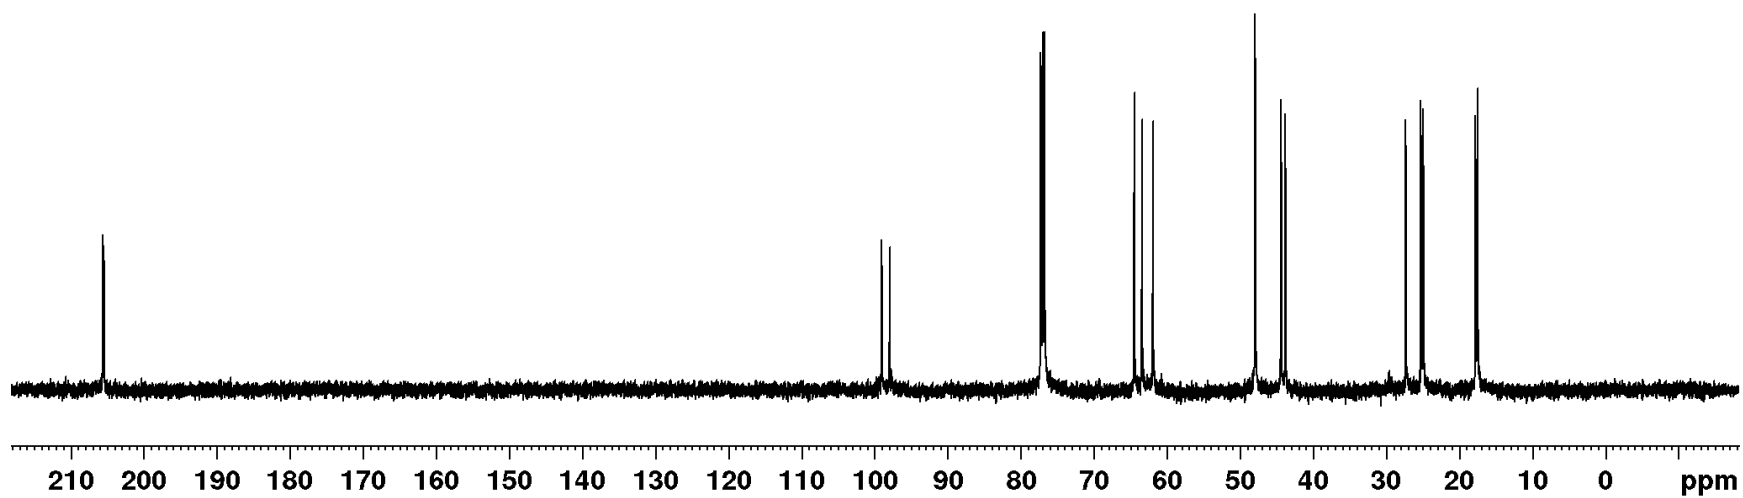

DEPT-135 125 MHz CDCl<sub>3</sub>

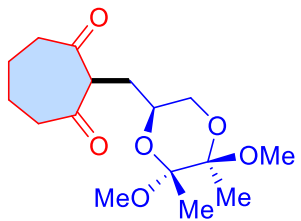

Product-(-)-6II

64.50  
63.45  
61.95  
48.00  
47.97  
44.45  
43.86  
27.36  
25.29  
24.99  
17.82  
17.52

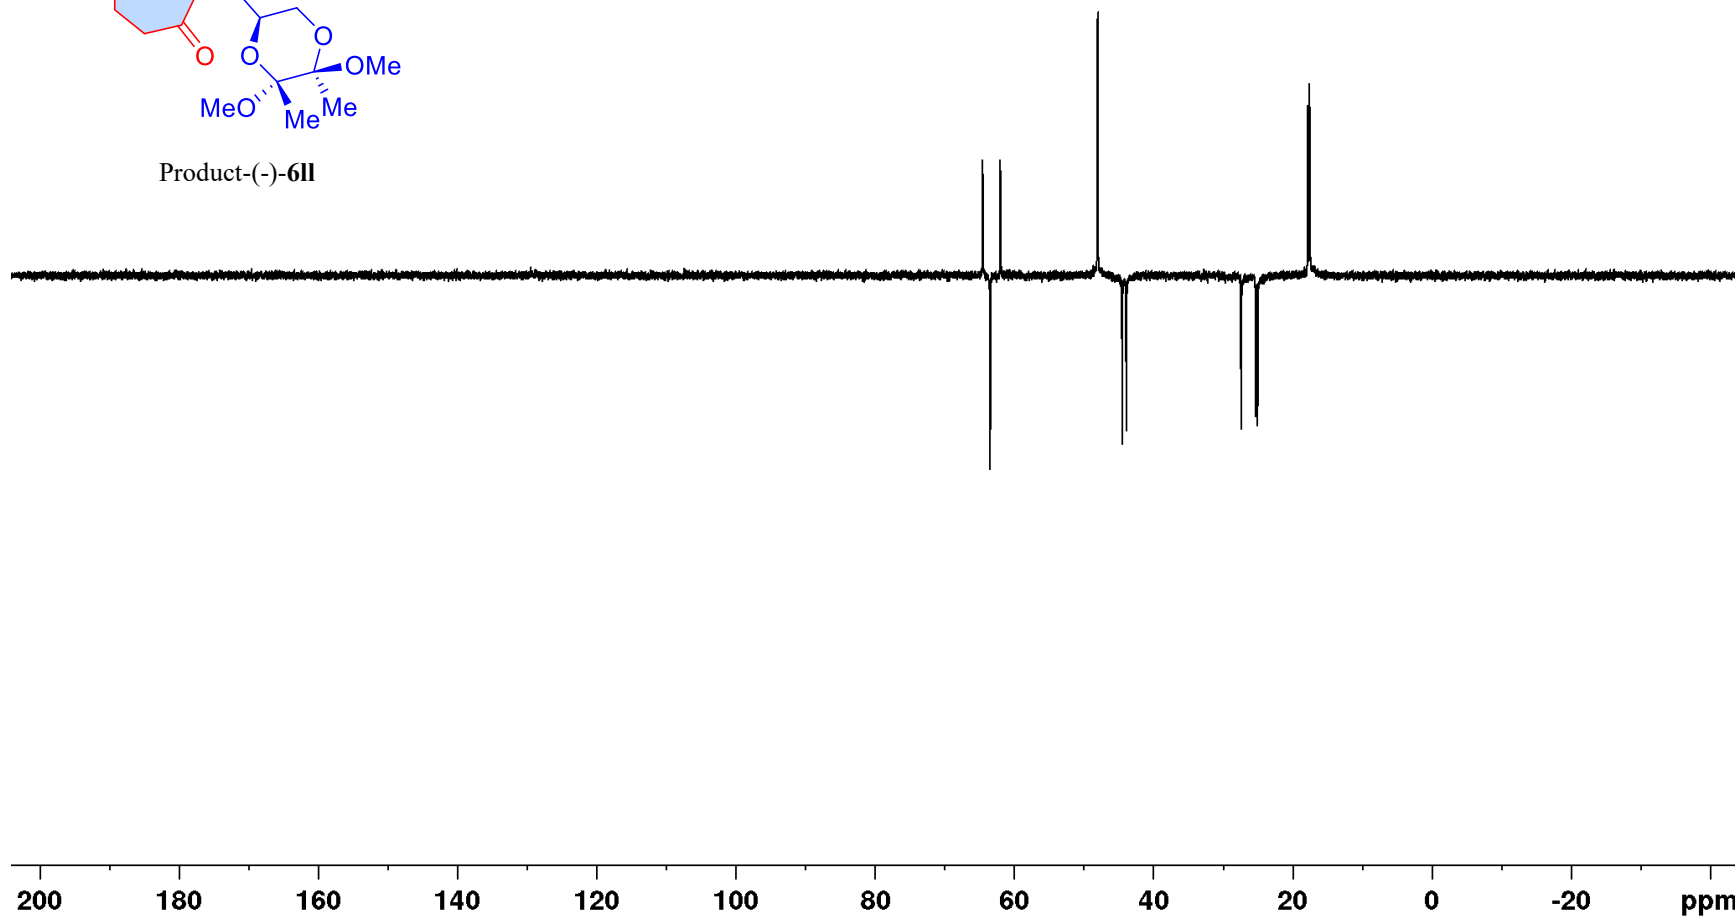

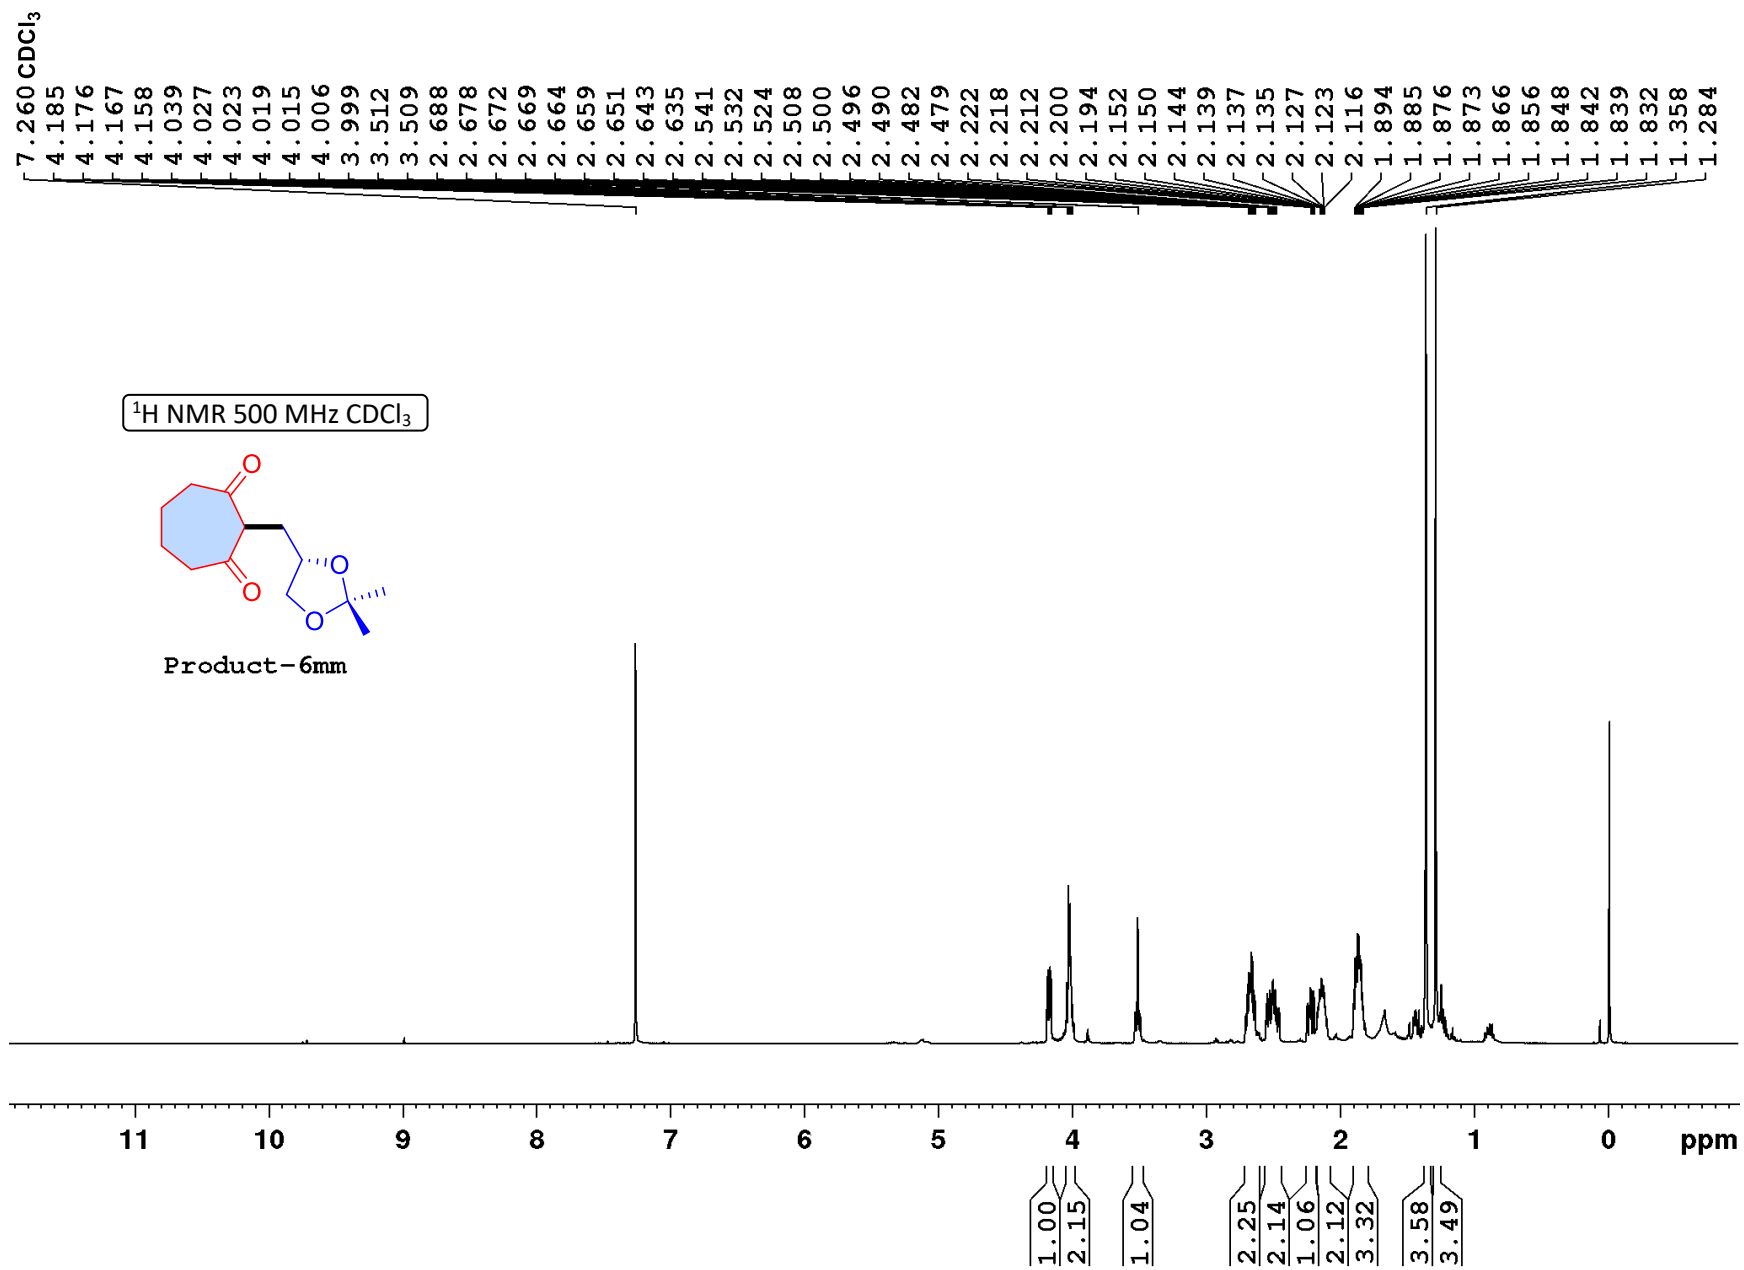

205.91  
205.66

109.01

77.25  
76.99 CDCl<sub>3</sub>  
76.74  
73.40  
69.33  
62.99

44.45  
44.00

30.14  
26.84  
25.51  
25.08  
24.88

<sup>13</sup>C{<sup>1</sup>H} NMR 125 MHz CDCl<sub>3</sub>

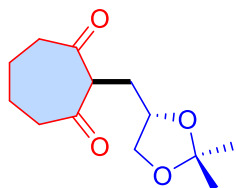

Product-6mm

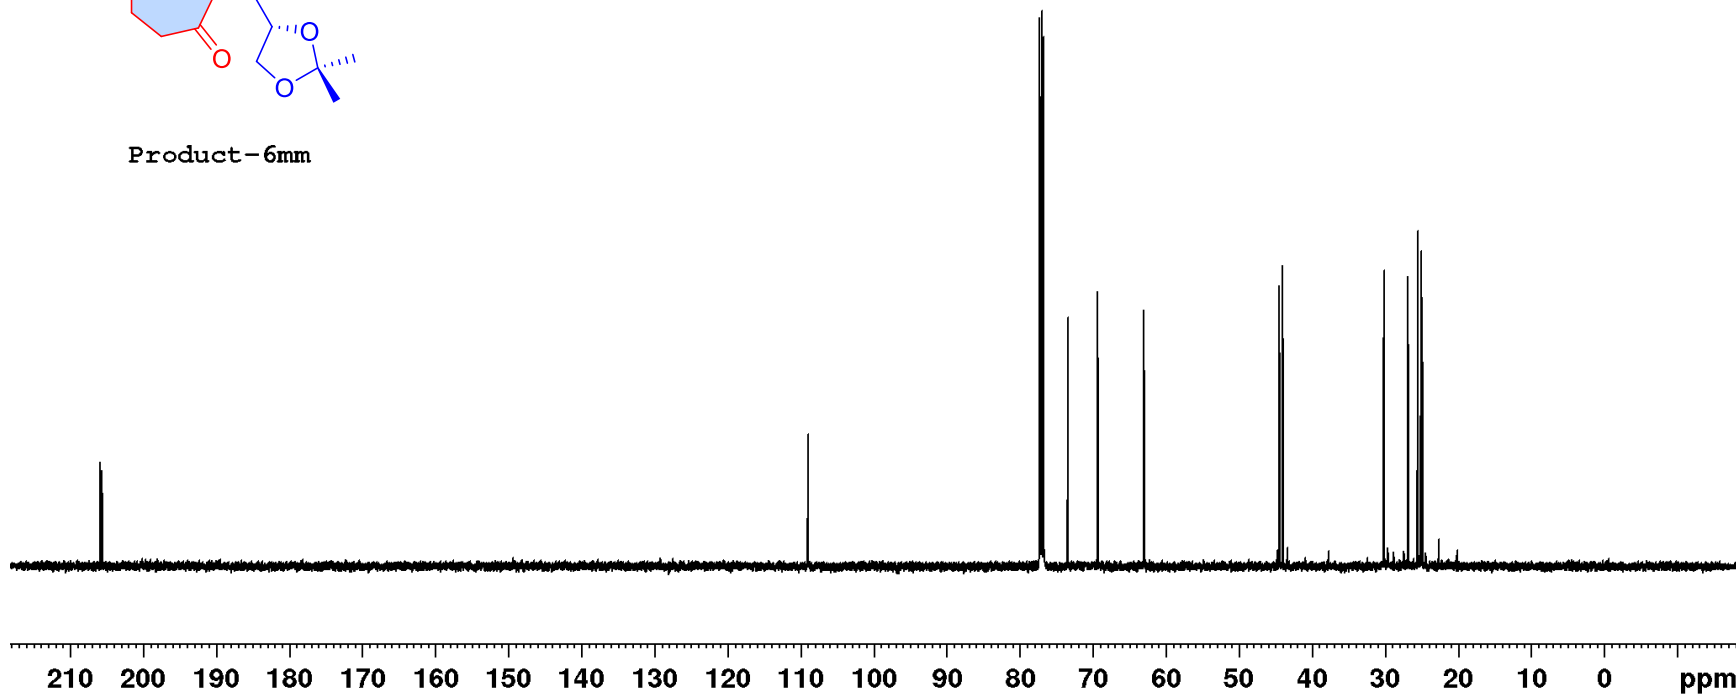

DEPT-135 125 MHz CDCl<sub>3</sub>

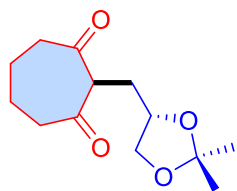

Product-(-)-6mm

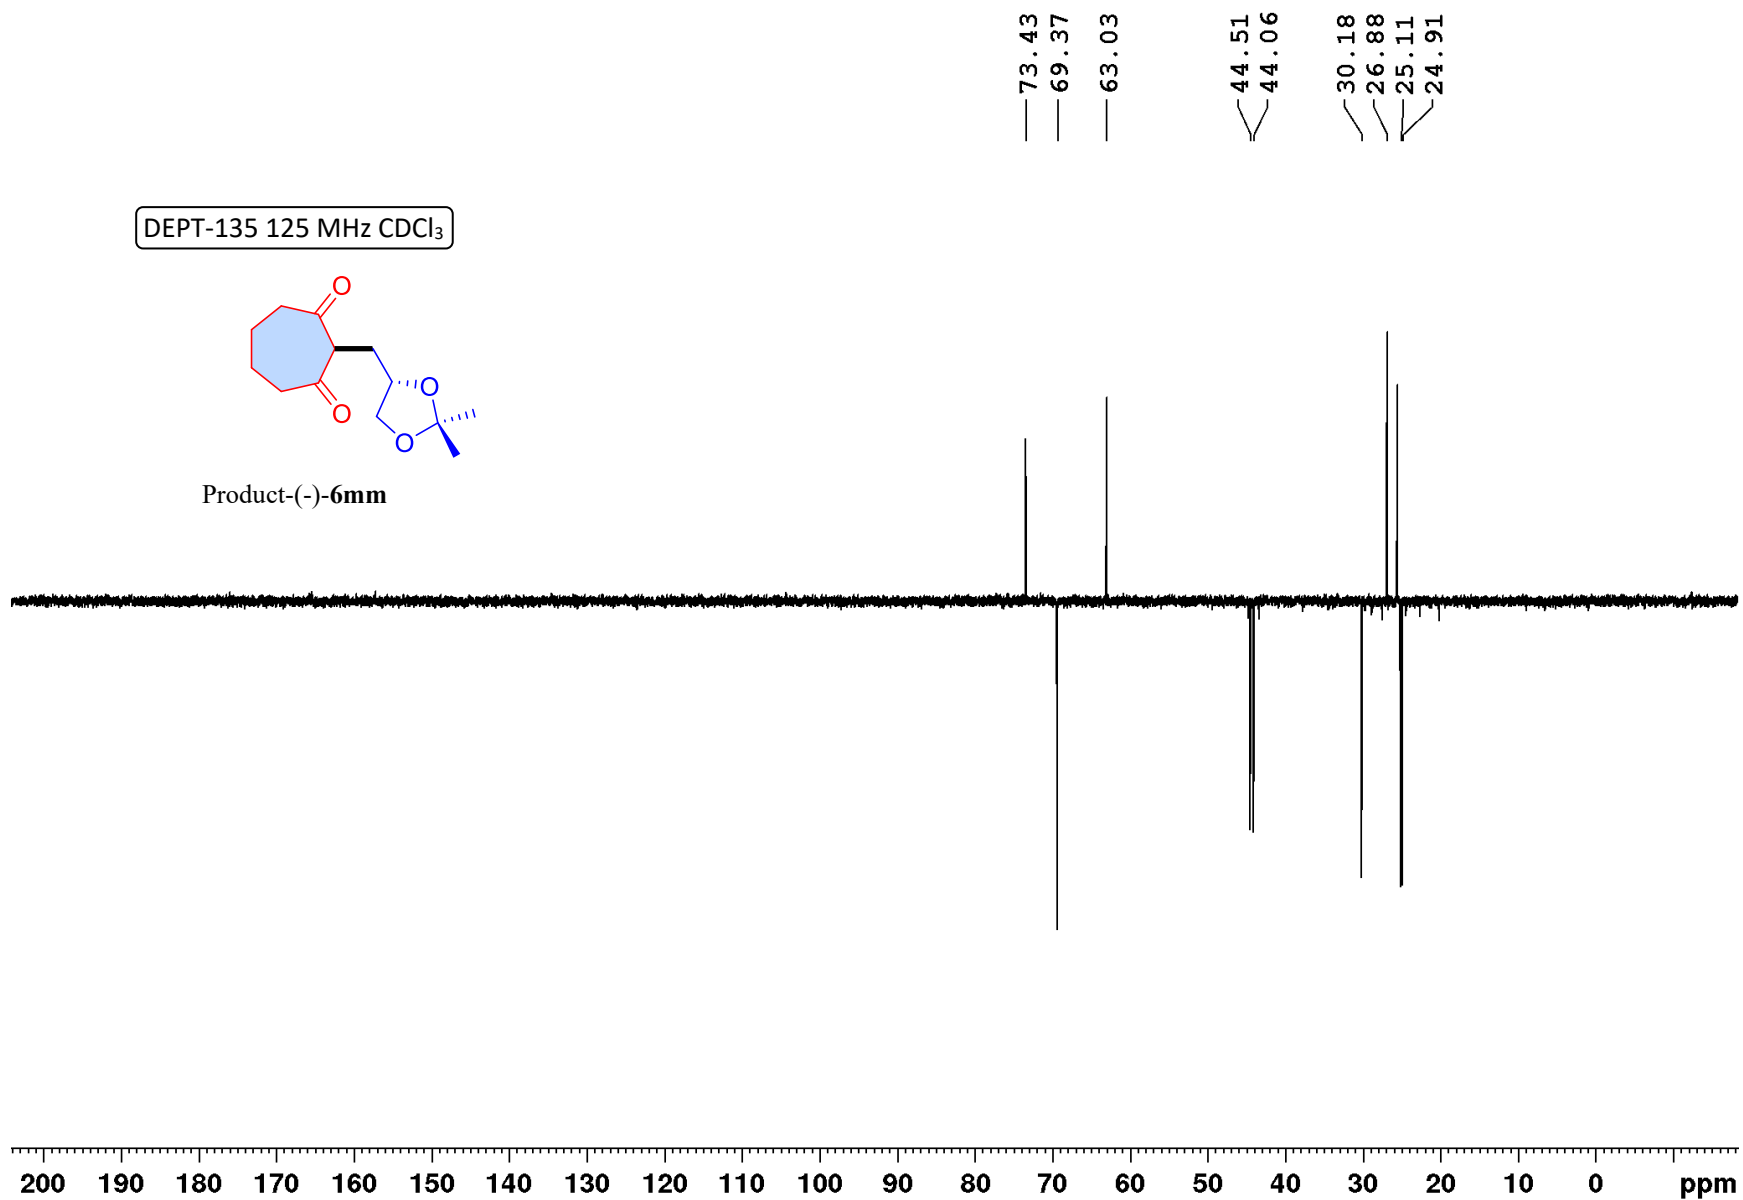



7.260 CDCl<sub>3</sub>

5.063  
5.061  
5.058  
3.607  
3.593  
3.579  
2.537  
2.529  
2.519  
2.511  
2.504  
2.499  
2.482  
2.050  
2.042  
2.034  
2.028  
2.020  
2.010  
2.002  
1.954  
1.936  
1.919  
1.901  
1.896  
1.891  
1.884  
1.874  
1.868  
1.860  
1.858  
1.854  
1.844  
1.835  
1.830  
1.826  
1.818  
1.793  
1.783  
1.770  
1.760  
1.757  
1.662  
1.580  
1.388  
1.374  
1.297  
1.184  
1.172  
1.161  
1.116  
1.029  
1.027  
1.016  
1.004  
0.863  
0.849

<sup>1</sup>H NMR 500 MHz CDCl<sub>3</sub>

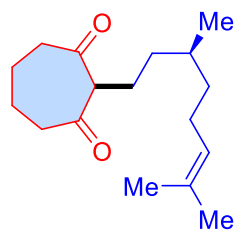

Product-(+)-6nn

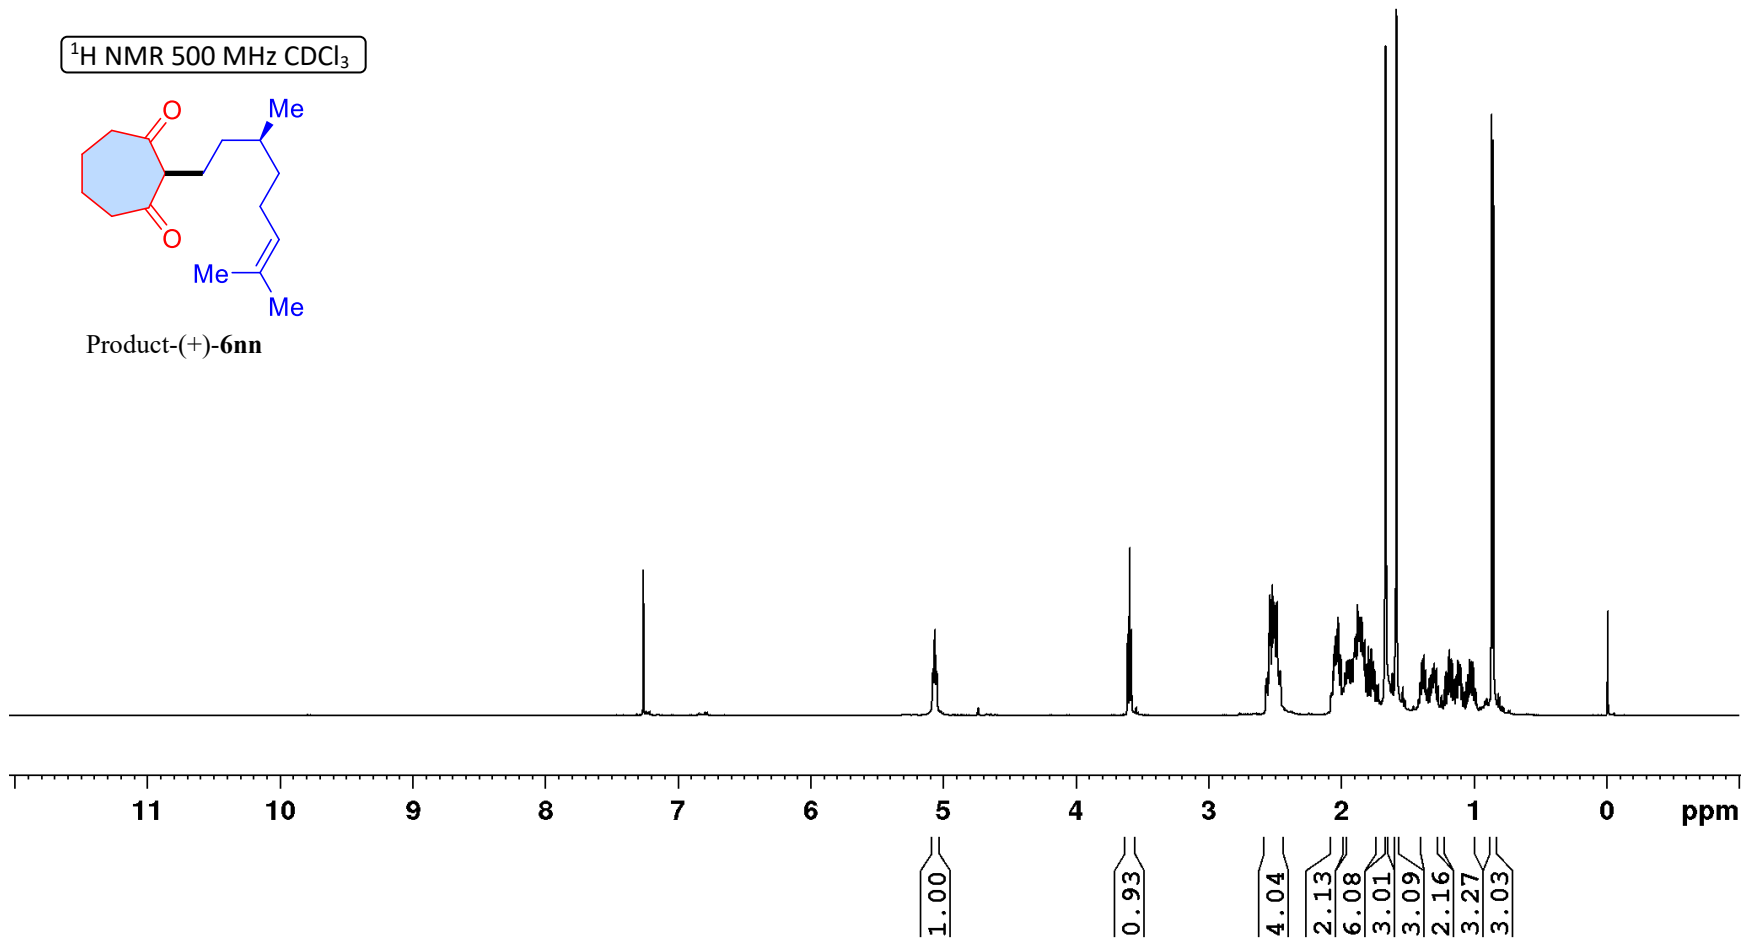

207.68  
207.66

131.10  
124.75

77.25  
76.99 CDCl<sub>3</sub>  
76.74  
67.20

43.70  
36.72  
34.20  
32.38  
25.87  
25.84  
25.67  
25.40  
23.95  
19.32  
17.60

<sup>13</sup>C{<sup>1</sup>H} NMR 125 MHz CDCl<sub>3</sub>

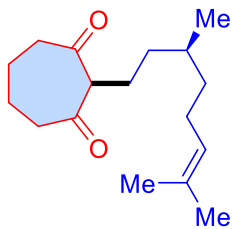

Product-(+)-6nn

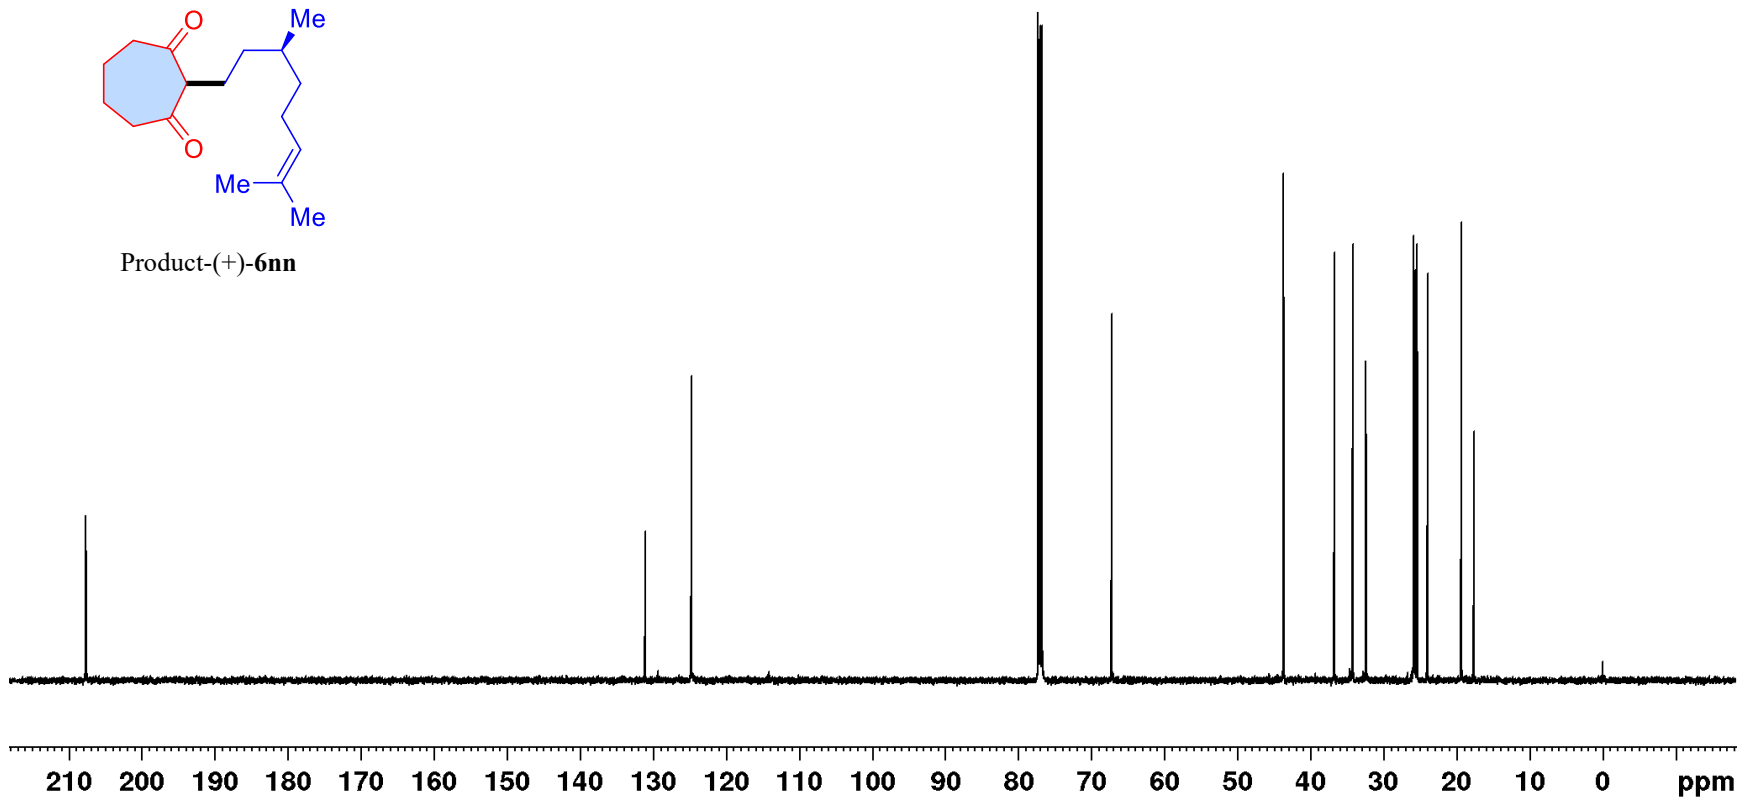

DEPT-135 125 MHz CDCl<sub>3</sub>

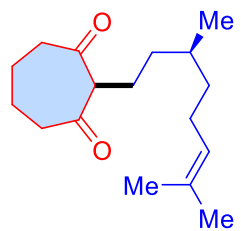

Product-(+)-6nn

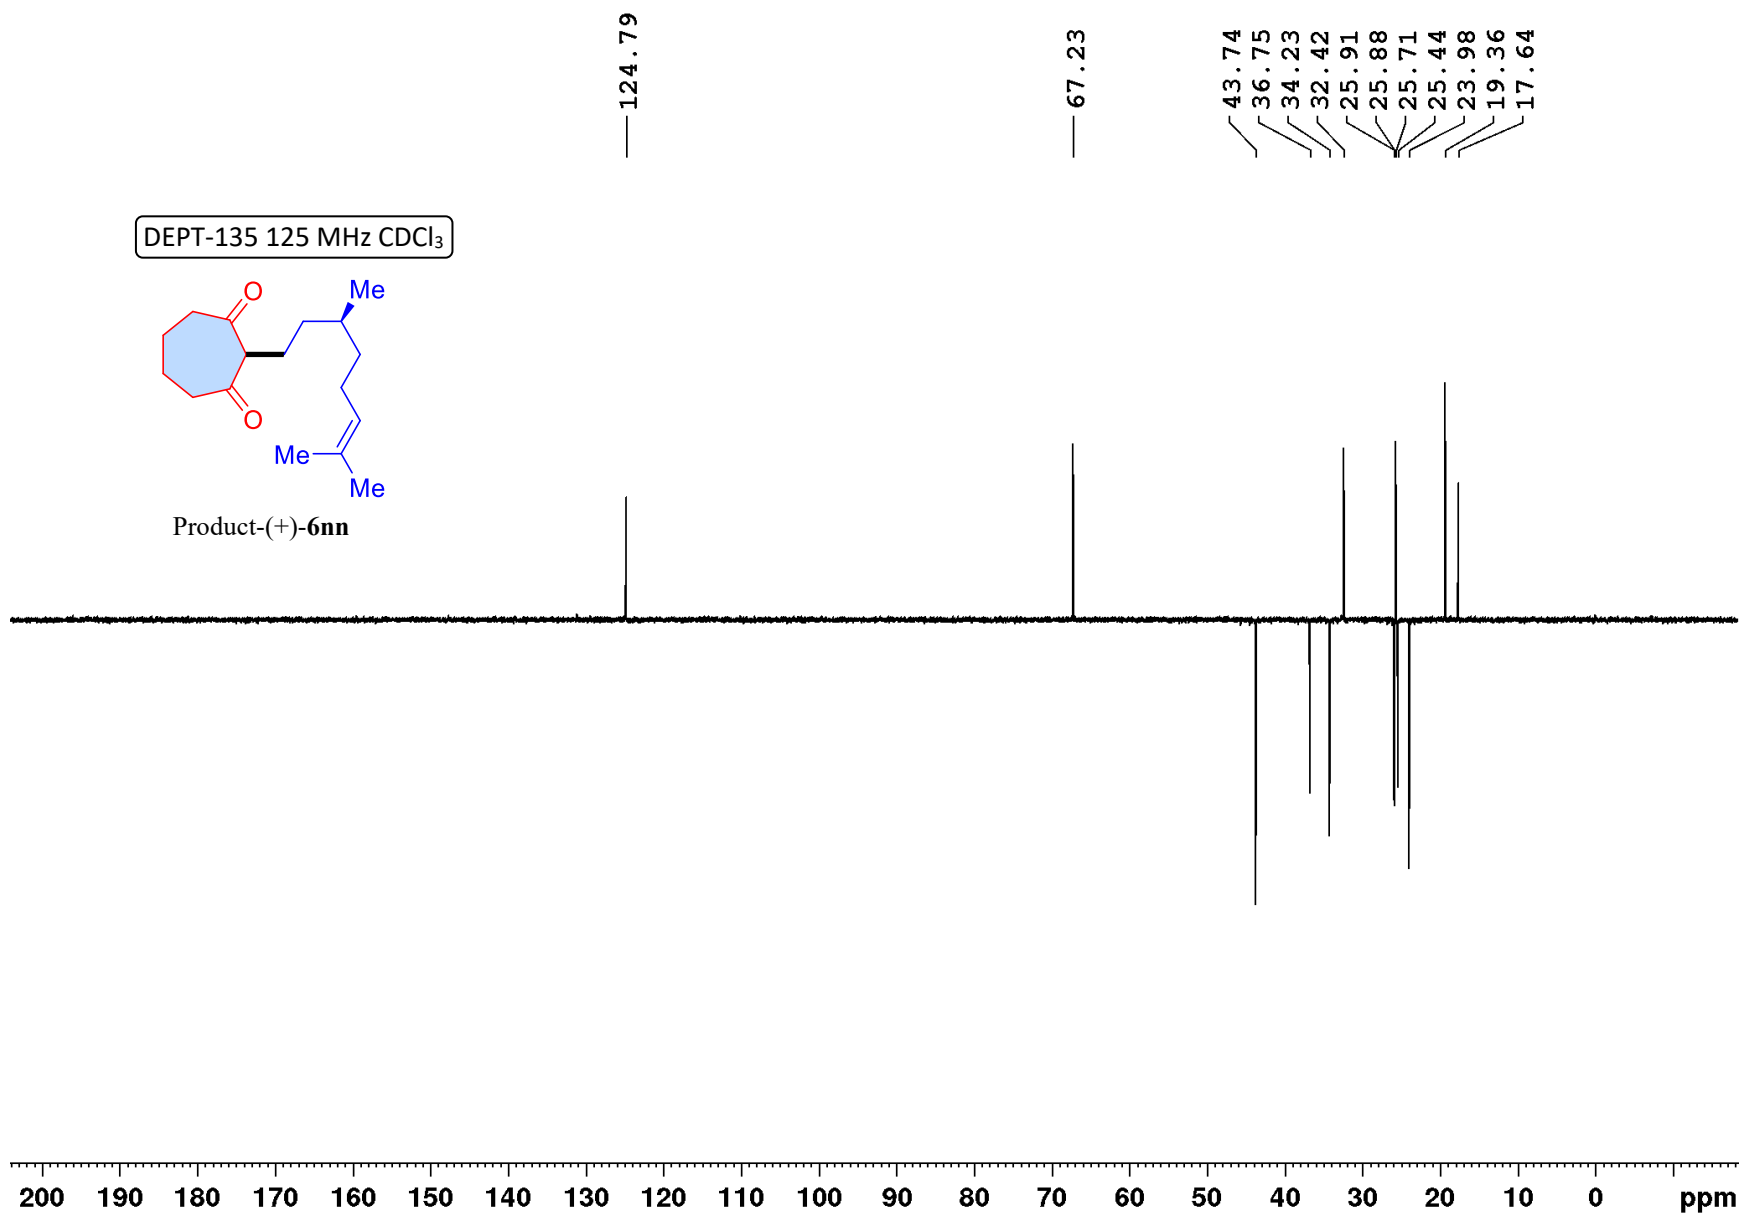

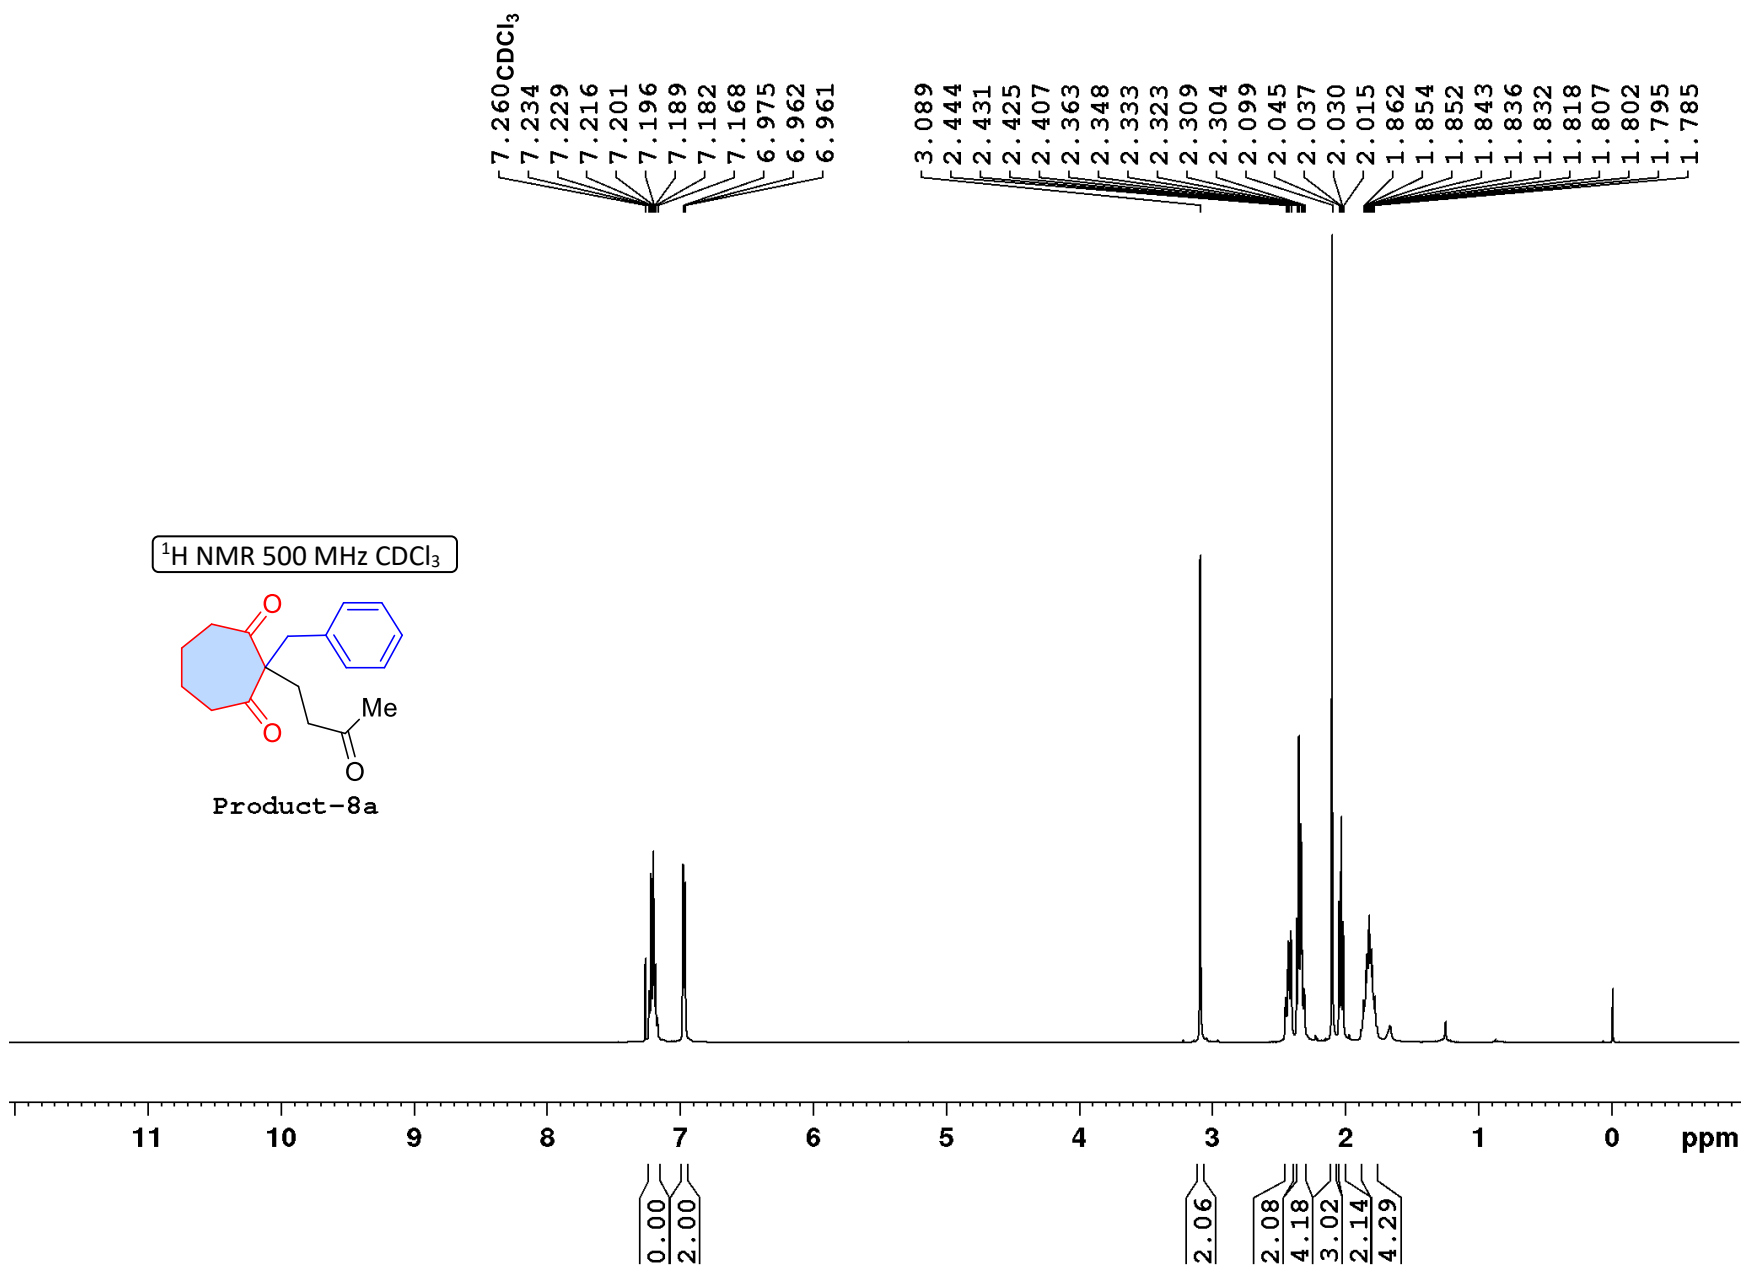

— 211.65  
— 206.75

— 135.76  
— 129.86  
— 128.38  
— 126.94

77.25  
77.00 CDCl<sub>3</sub>  
76.74  
— 68.79

— 42.46  
— 37.44  
— 36.92  
— 29.96  
— 27.82  
— 24.79

<sup>13</sup>C{<sup>1</sup>H} NMR 125 MHz CDCl<sub>3</sub>

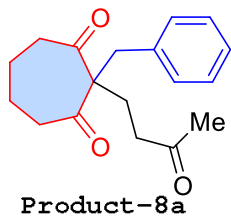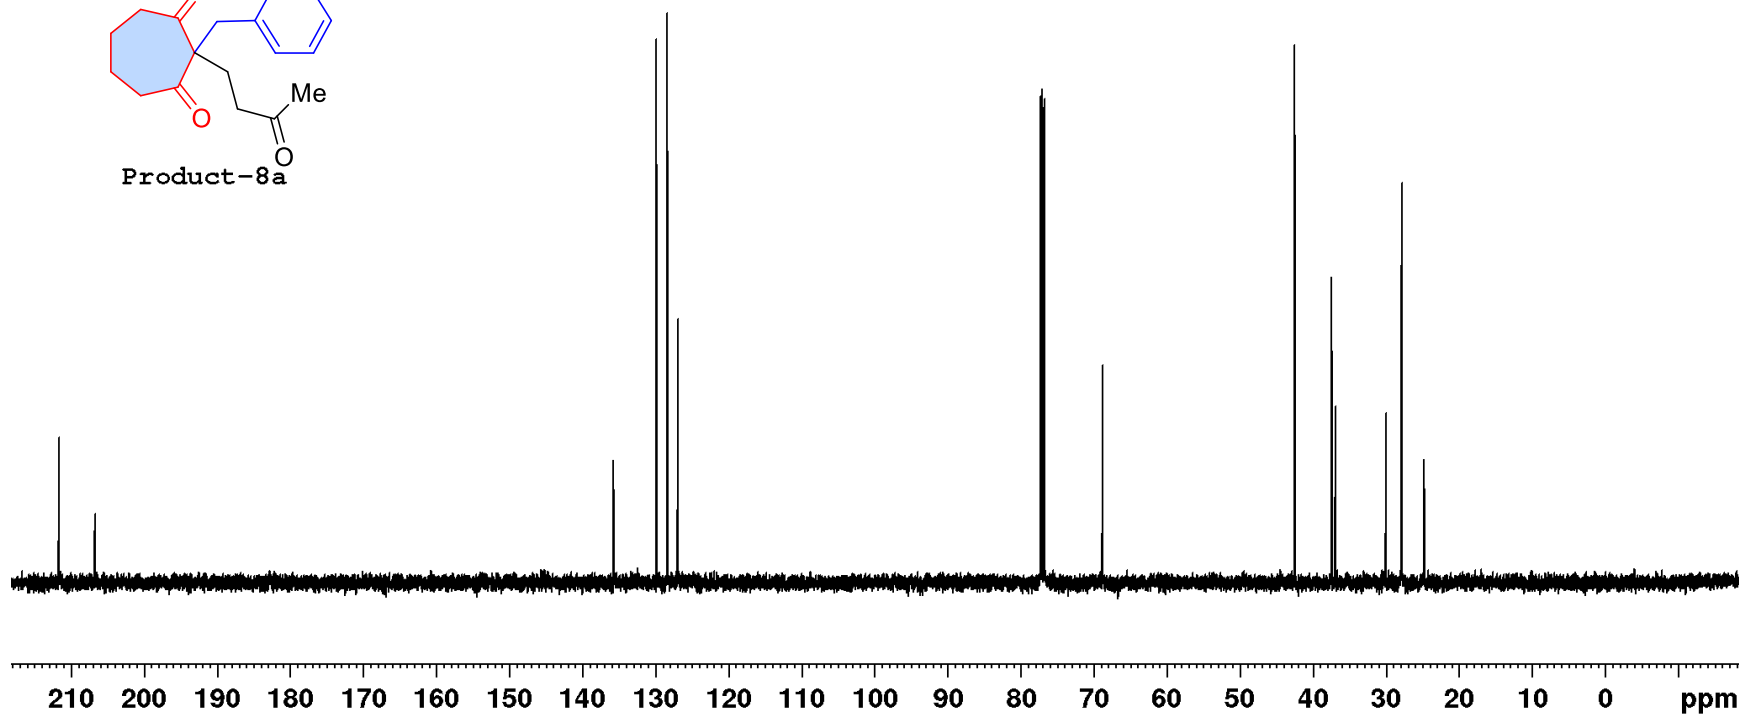

DEPT-135 125 MHz CDCl<sub>3</sub>

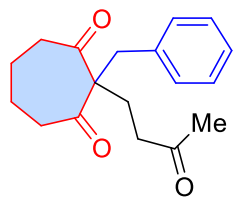

Product-8a

129.91  
128.44  
126.99

42.51  
37.49  
36.94  
30.03  
27.89  
24.78

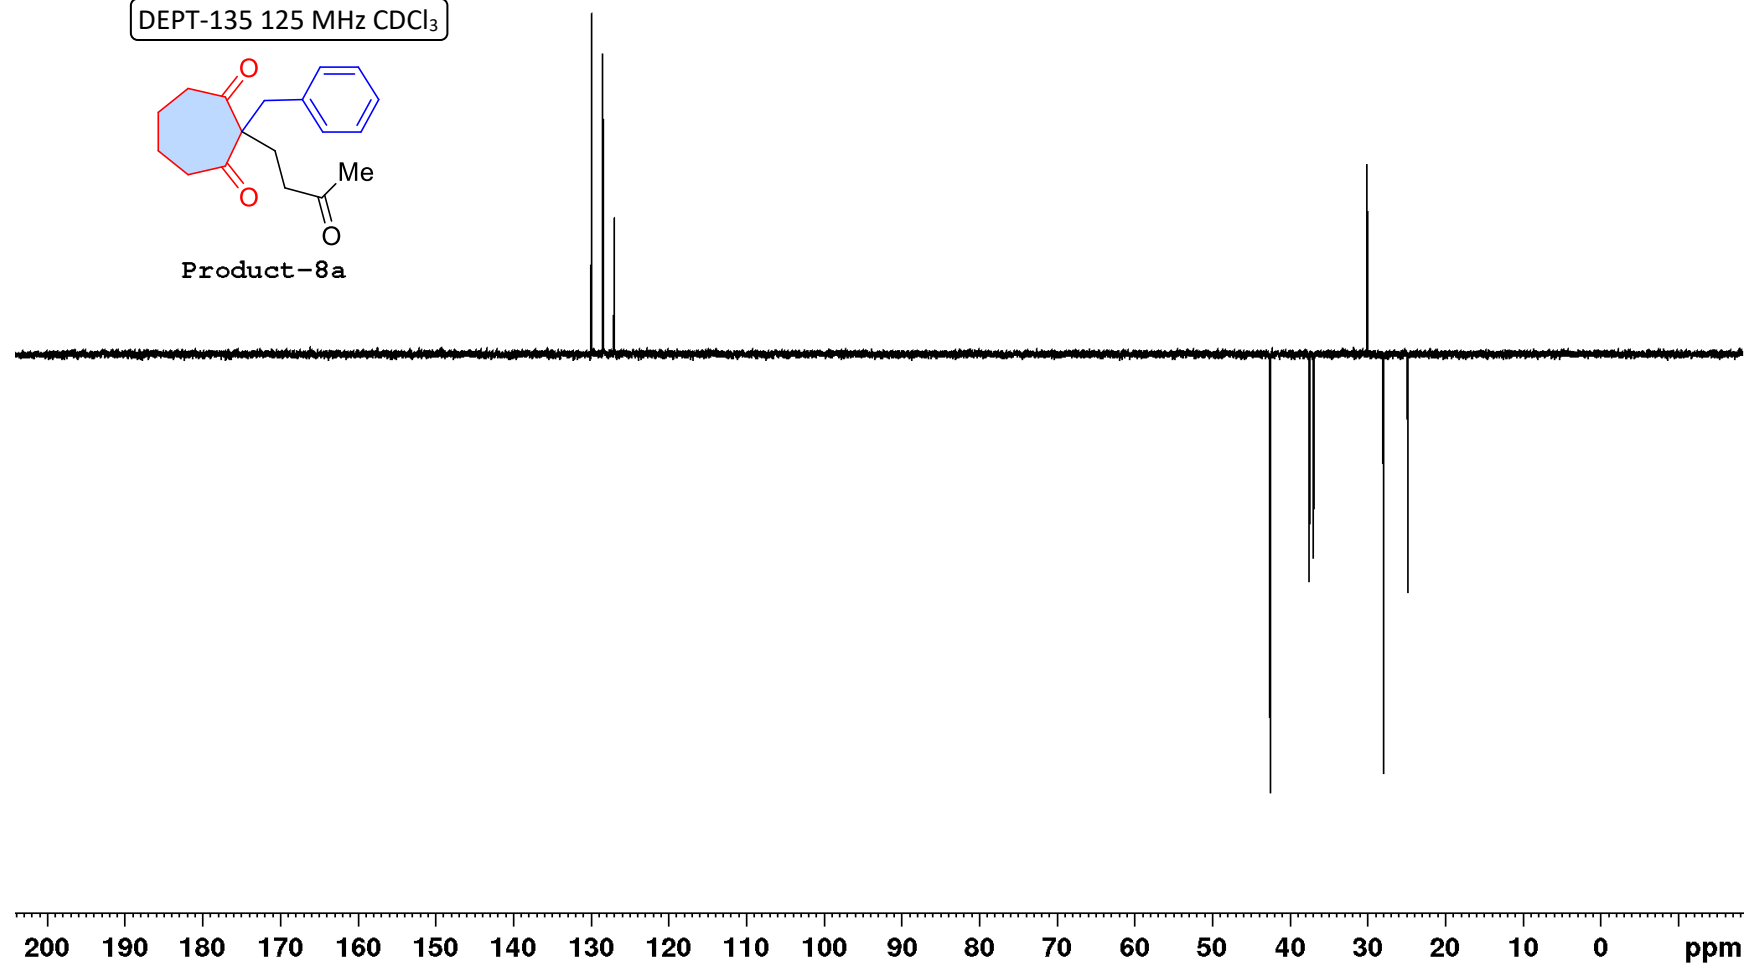

<sup>1</sup>H NMR 500 MHz CDCl<sub>3</sub>

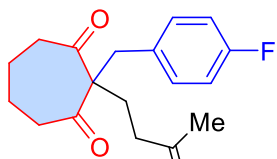

Product-8d

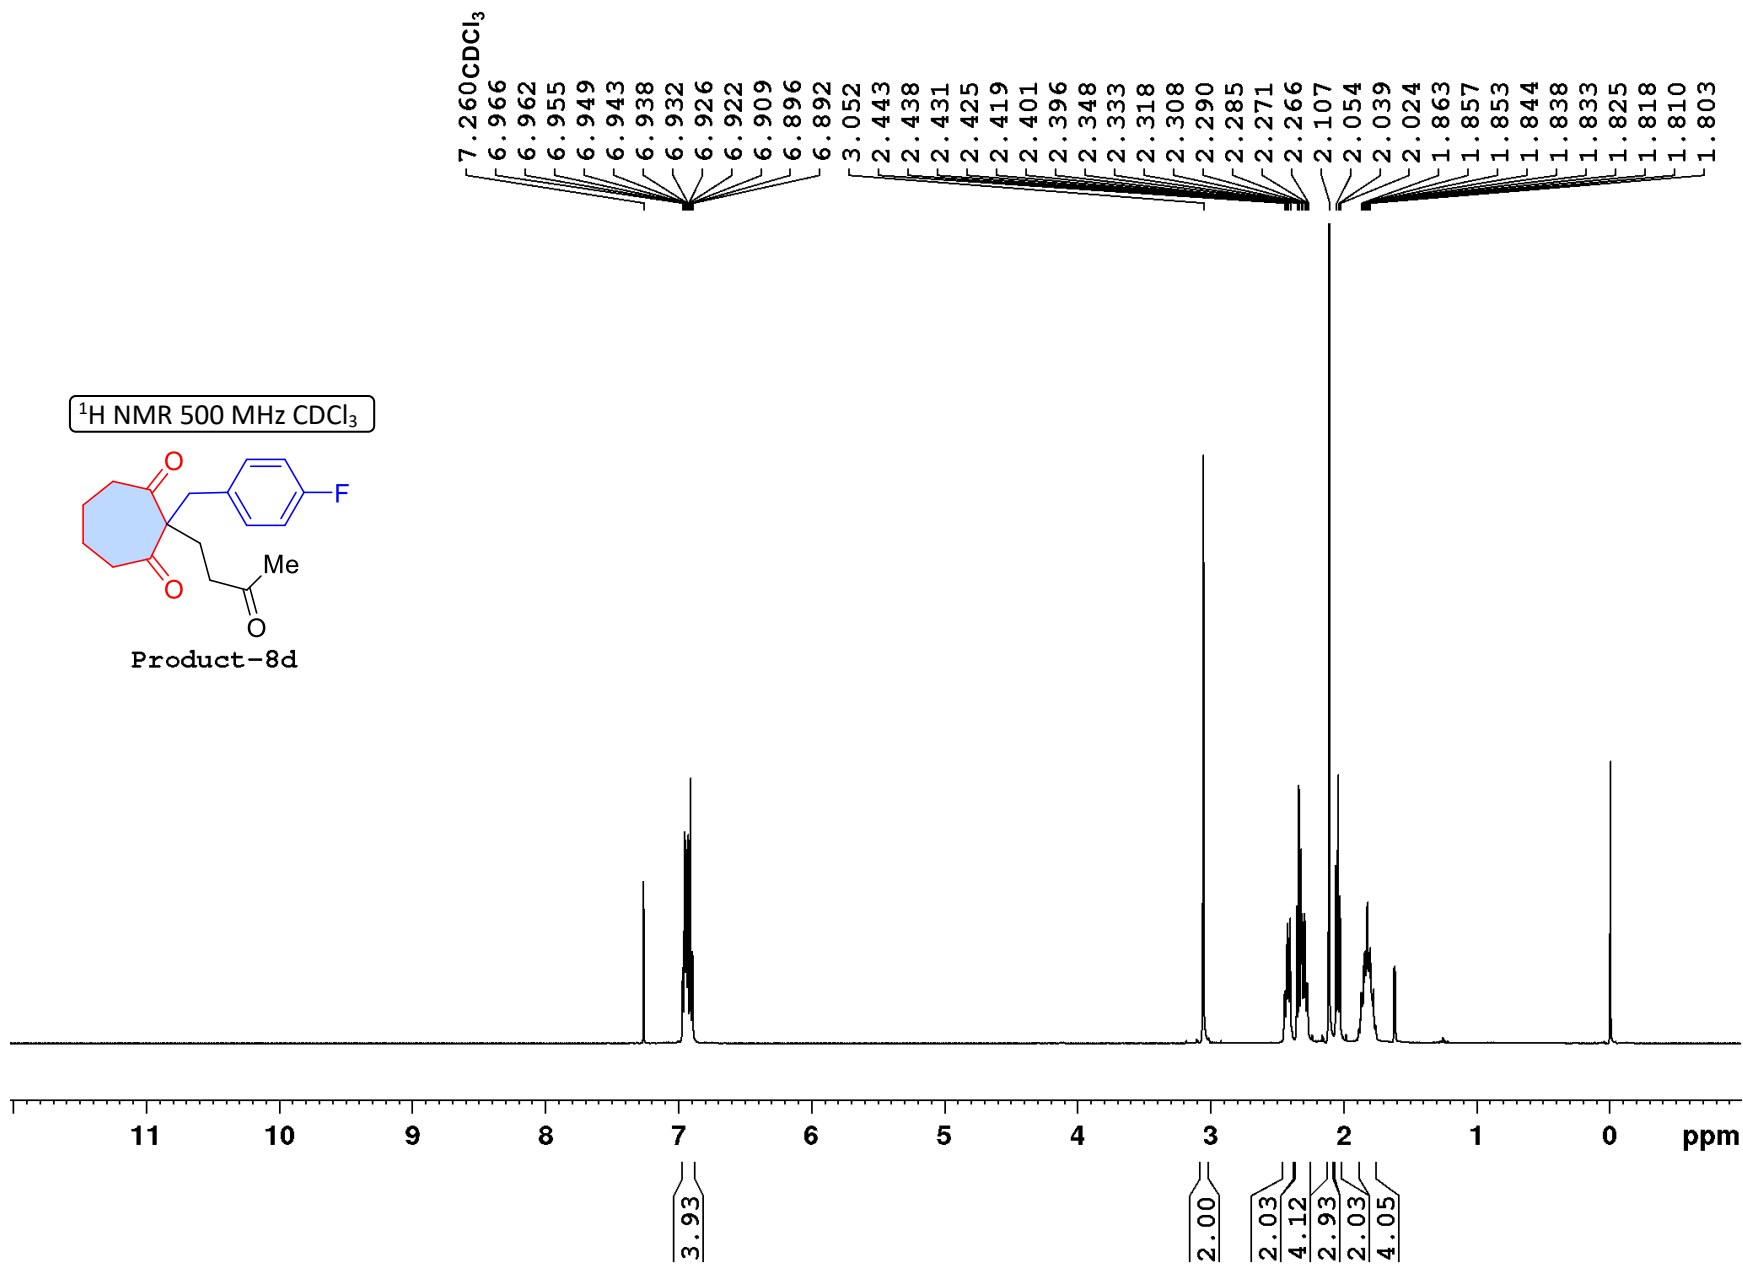

— 211.59  
— 206.62

— 162.87  
— 160.88

— 131.51  
— 131.49  
— 131.44  
— 131.38

— 115.38  
— 115.21

— 77.24  
— 76.99  
— 76.74  
— 68.74  
CDCl<sub>3</sub>

— 42.59  
— 37.37  
— 36.27  
— 29.99  
— 27.72  
— 25.04

<sup>13</sup>C{<sup>1</sup>H} NMR 125 MHz CDCl<sub>3</sub>

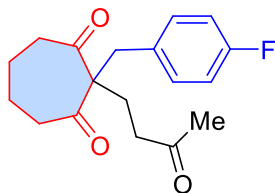

Product-8d

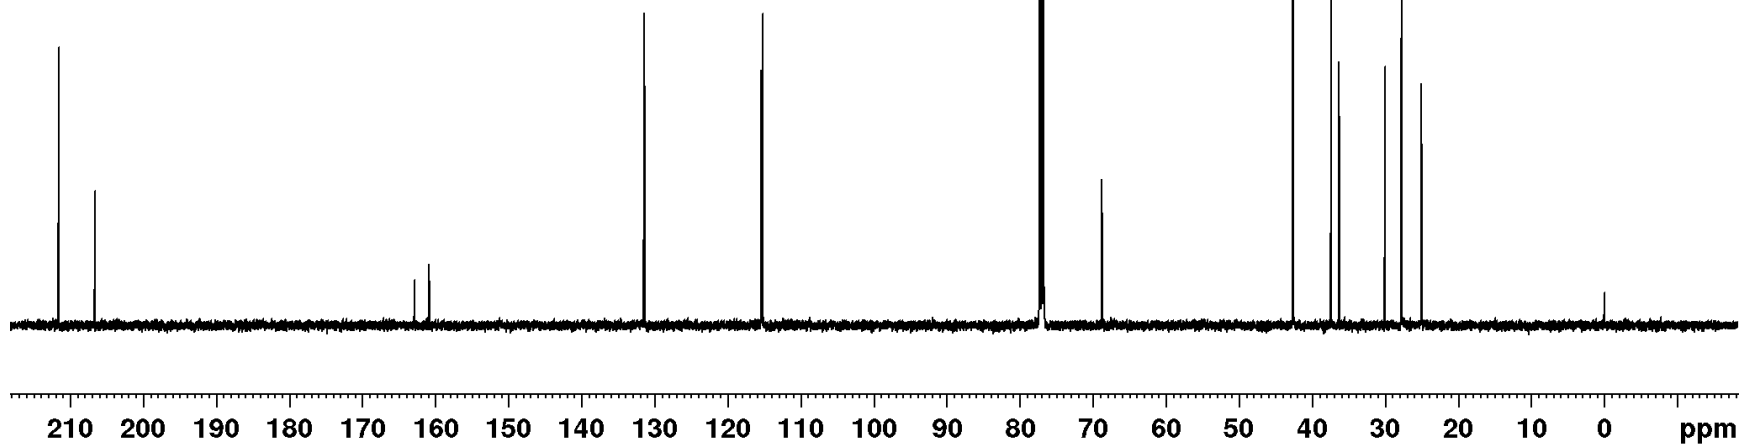



DEPT-135 125 MHz CDCl<sub>3</sub>

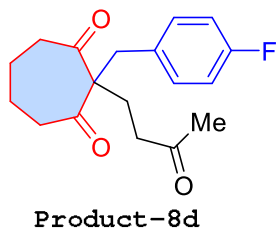

131.47  
131.41

115.42  
115.25

42.63  
37.40  
36.28  
30.05  
27.77  
25.04

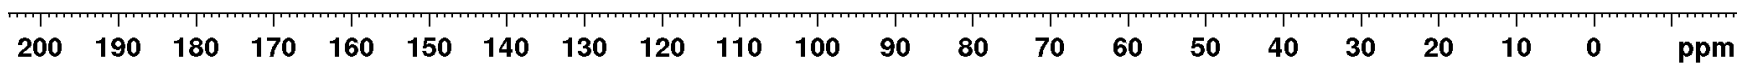

<sup>19</sup>F NMR 375 MHz CDCl<sub>3</sub>

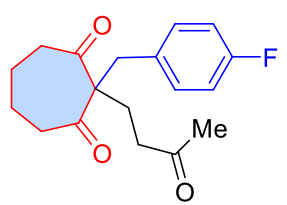

Product-8d

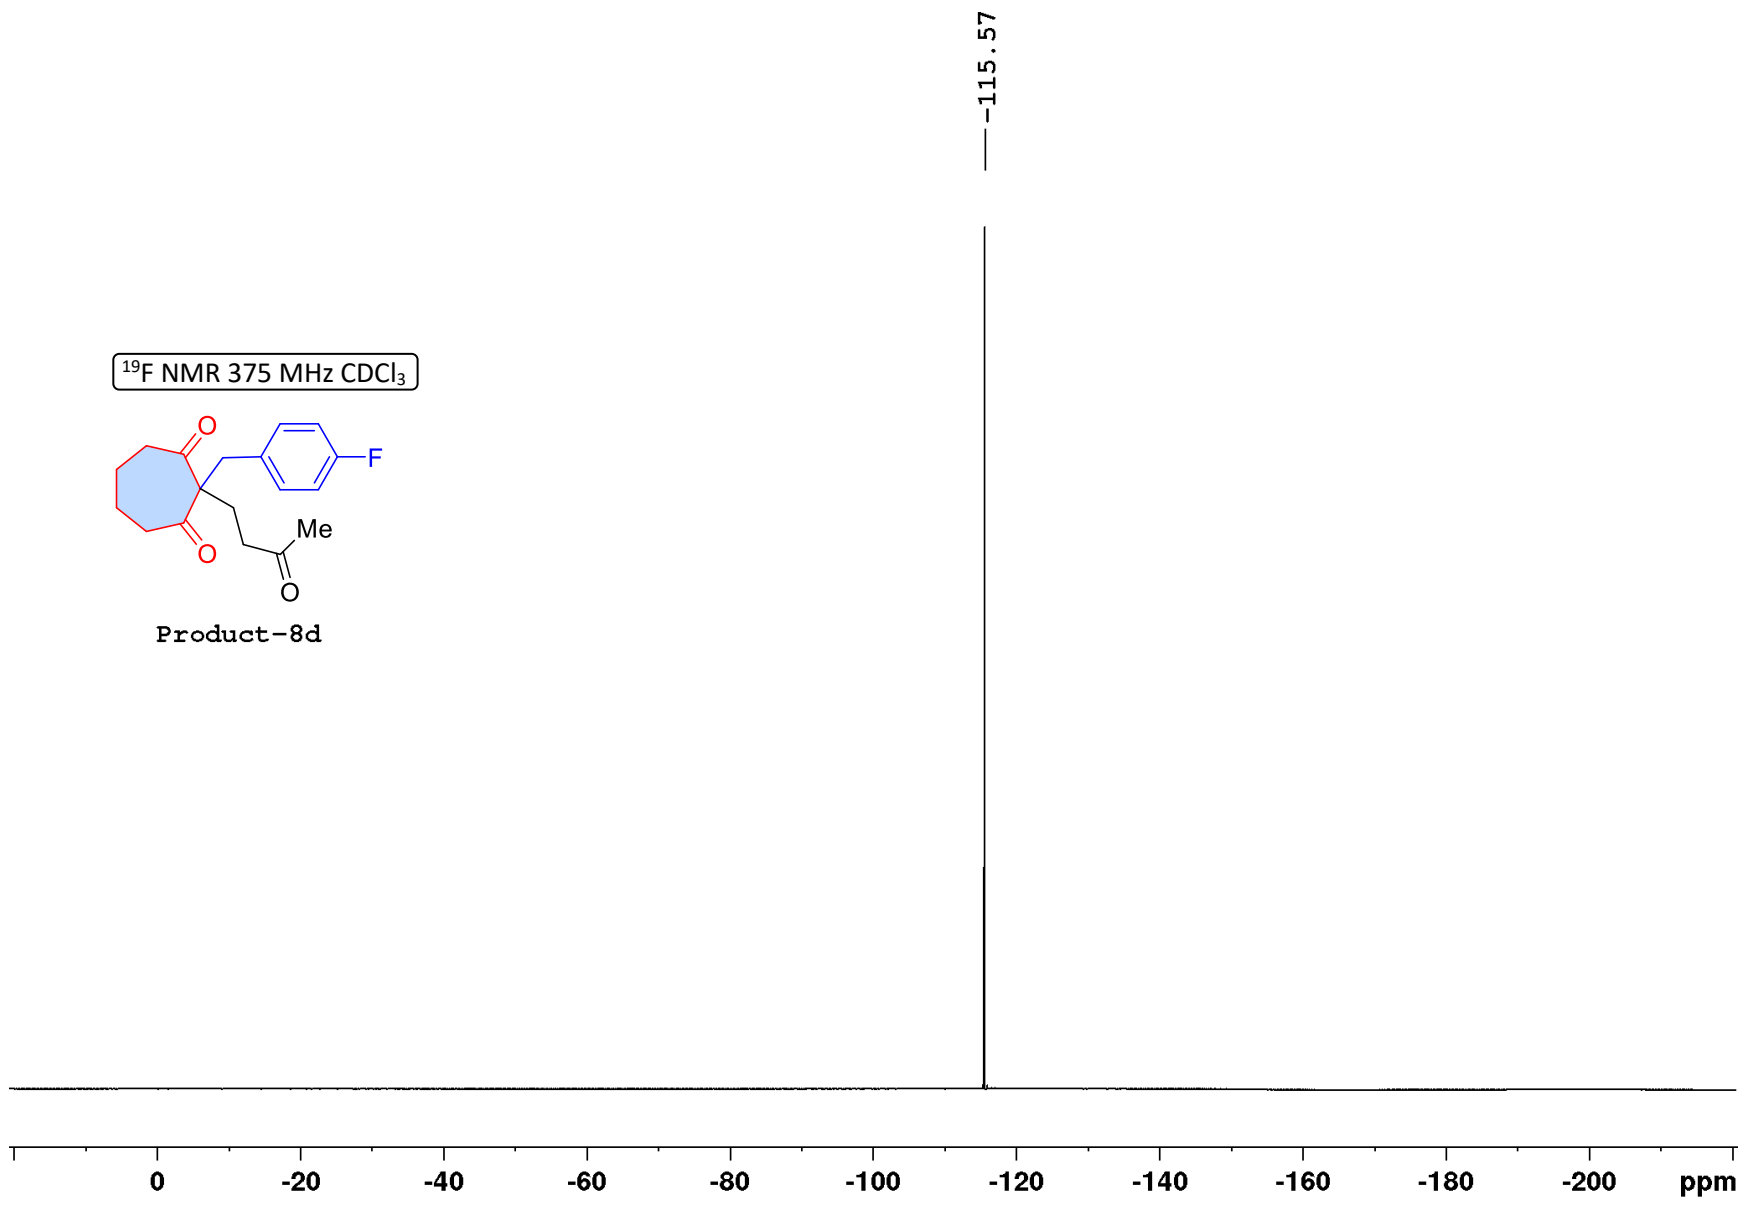

<sup>1</sup>H NMR 500 MHz CDCl<sub>3</sub>

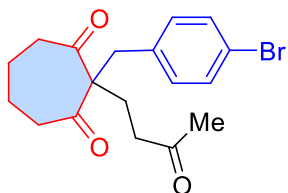

Product-8f

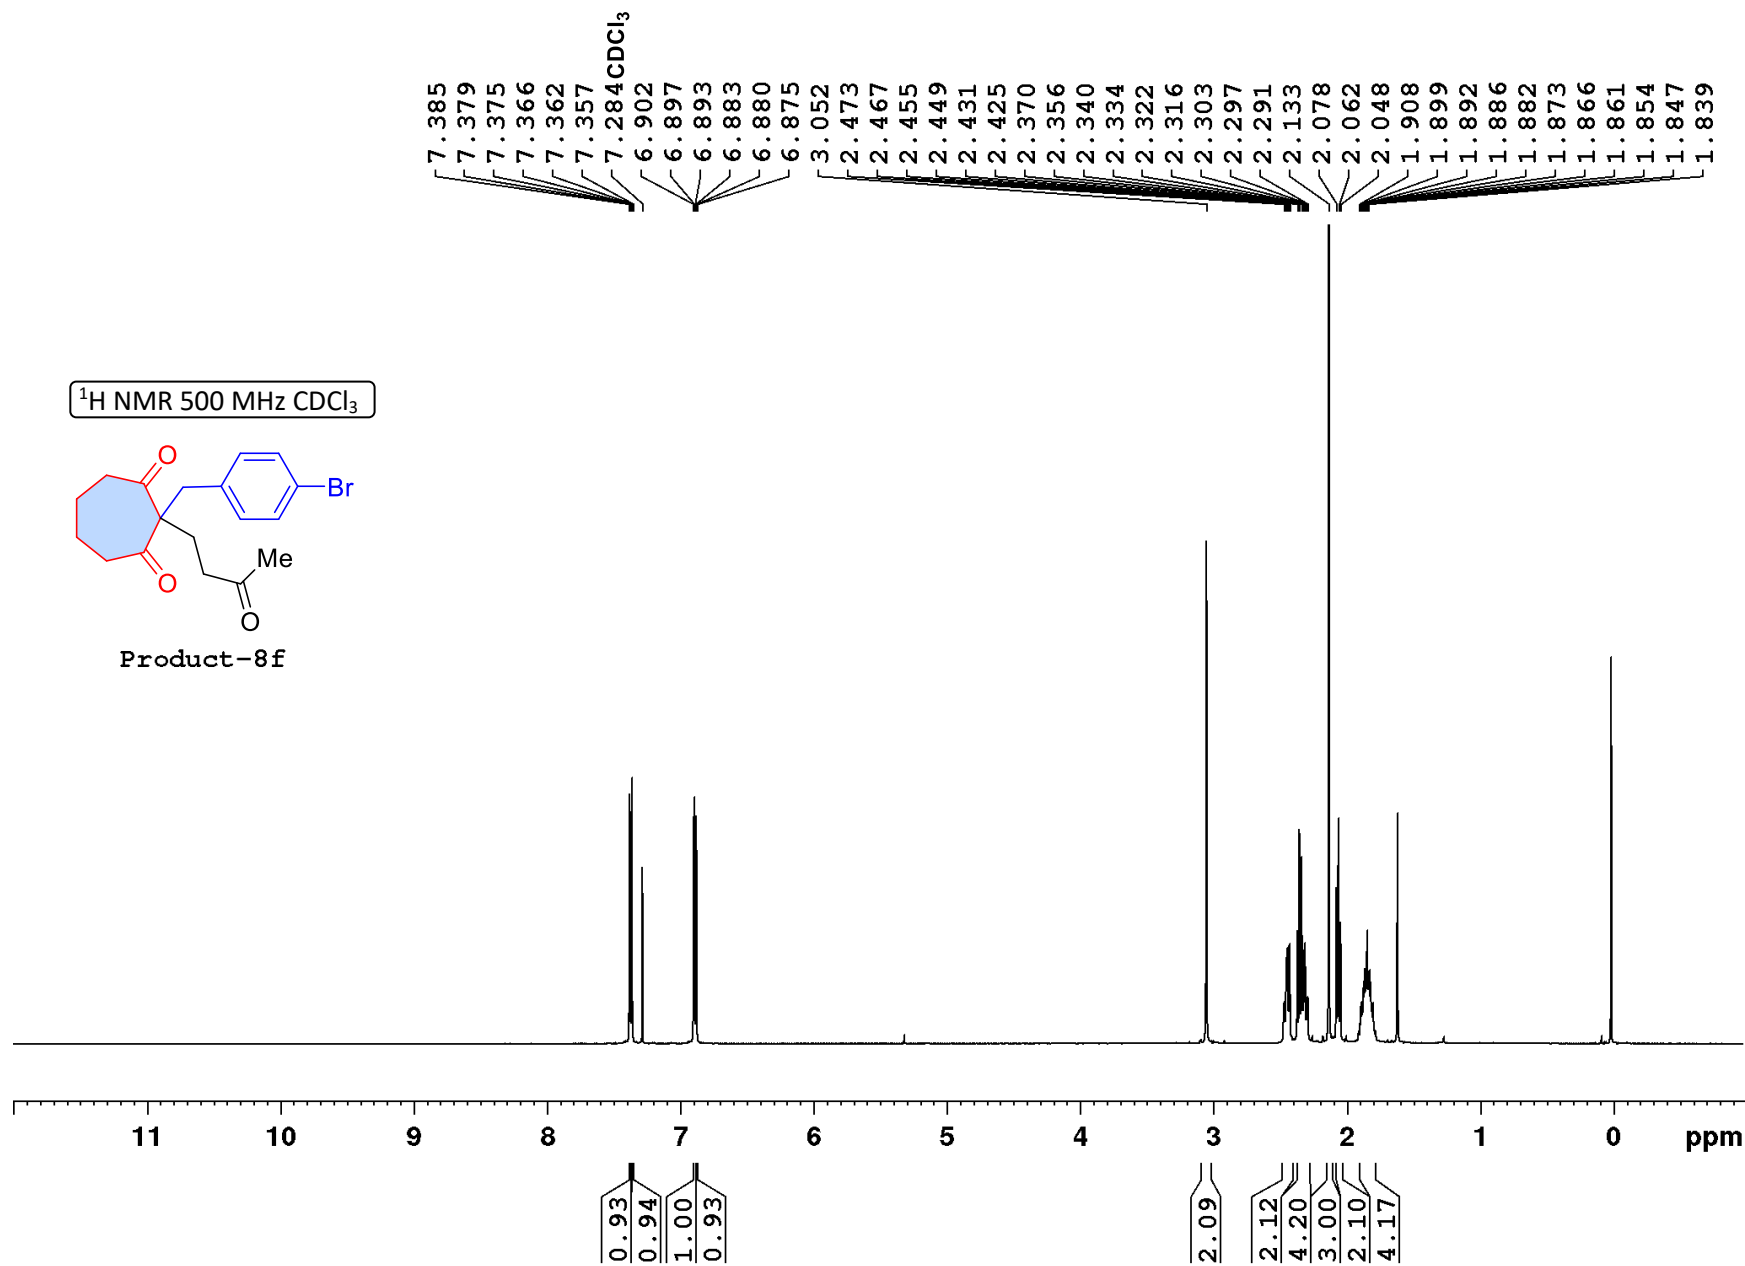

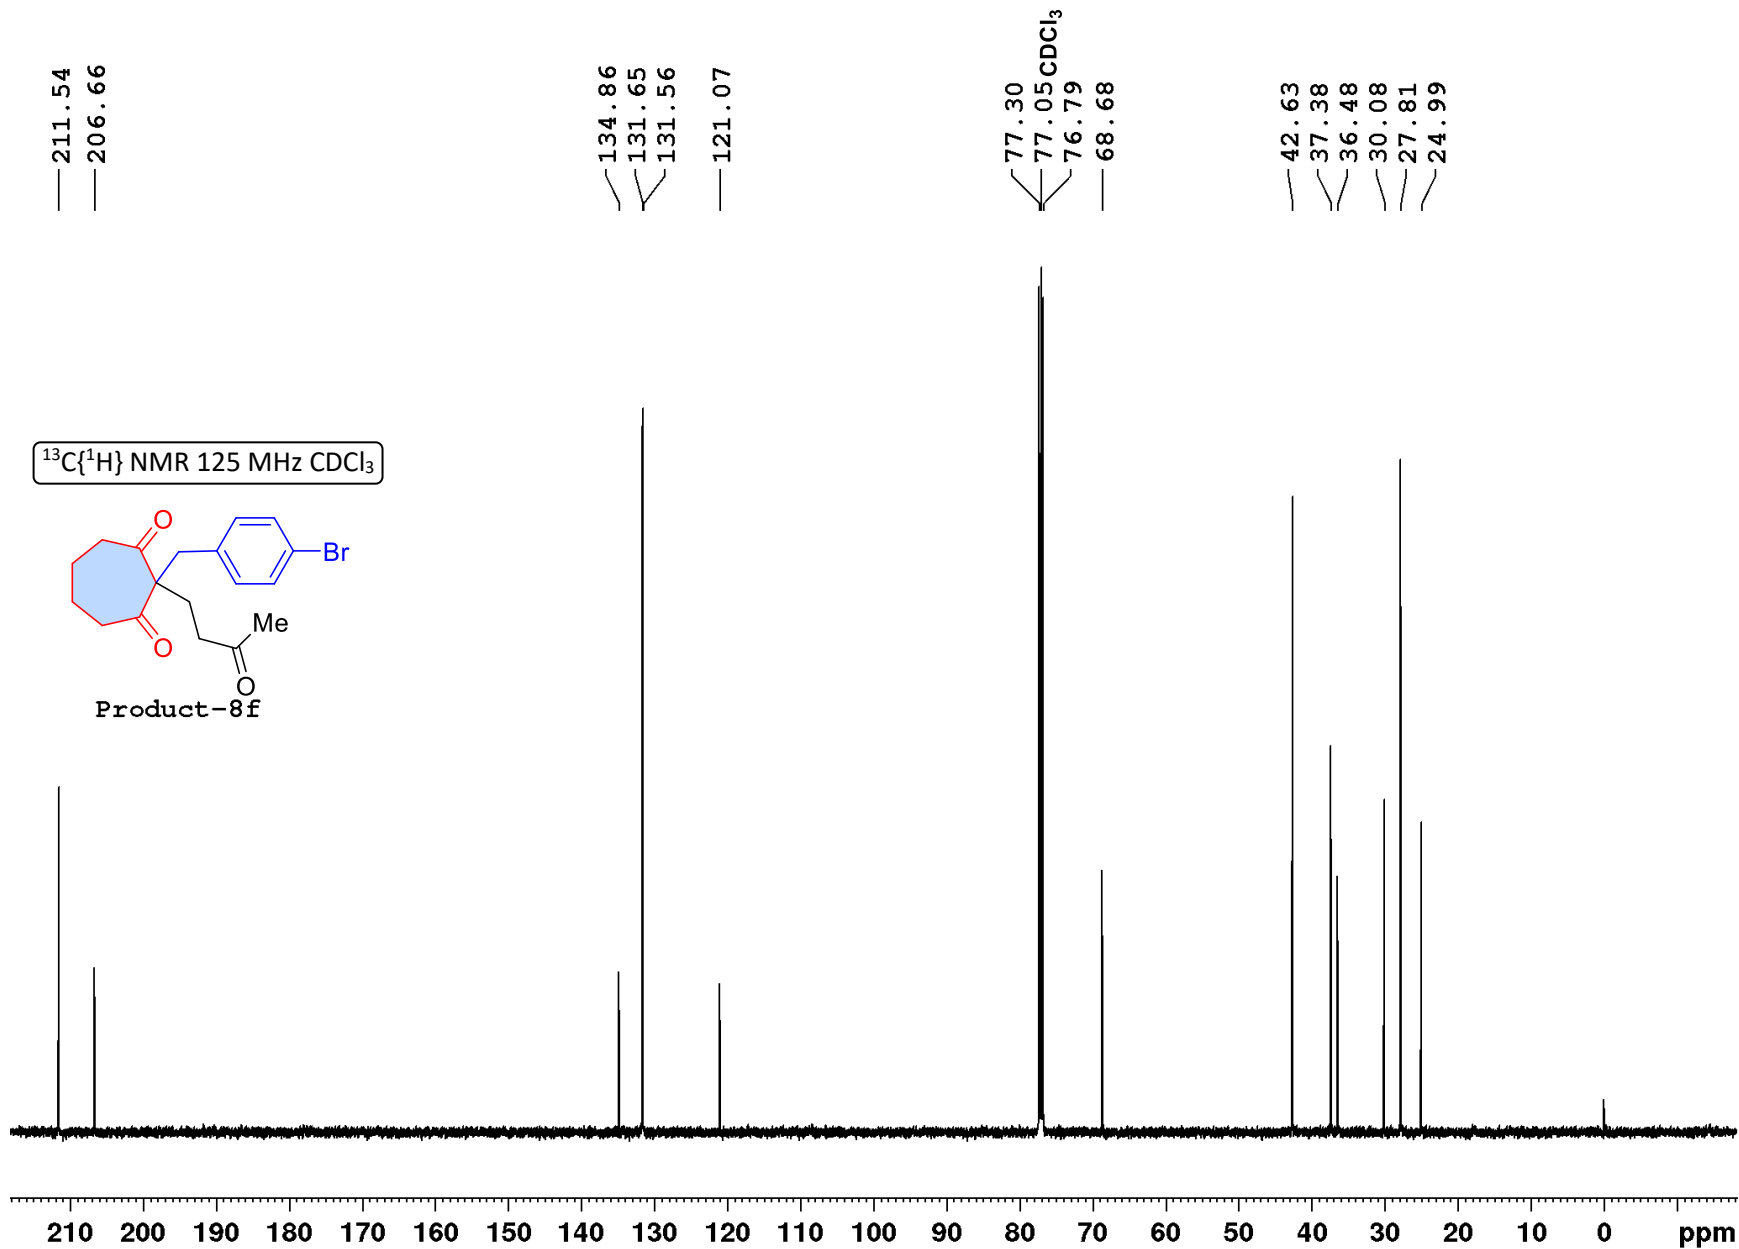

DEPT-135 125 MHz CDCl<sub>3</sub>

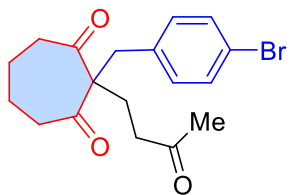

Product-8f

131.65  
131.56

42.77  
42.63  
37.38  
36.47  
30.09  
27.81  
24.98

— 0.01

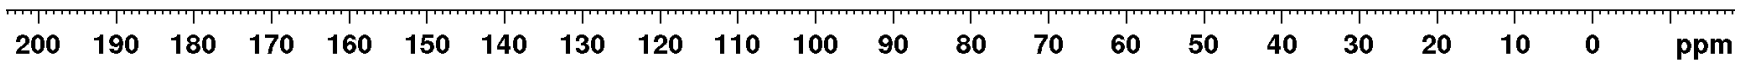

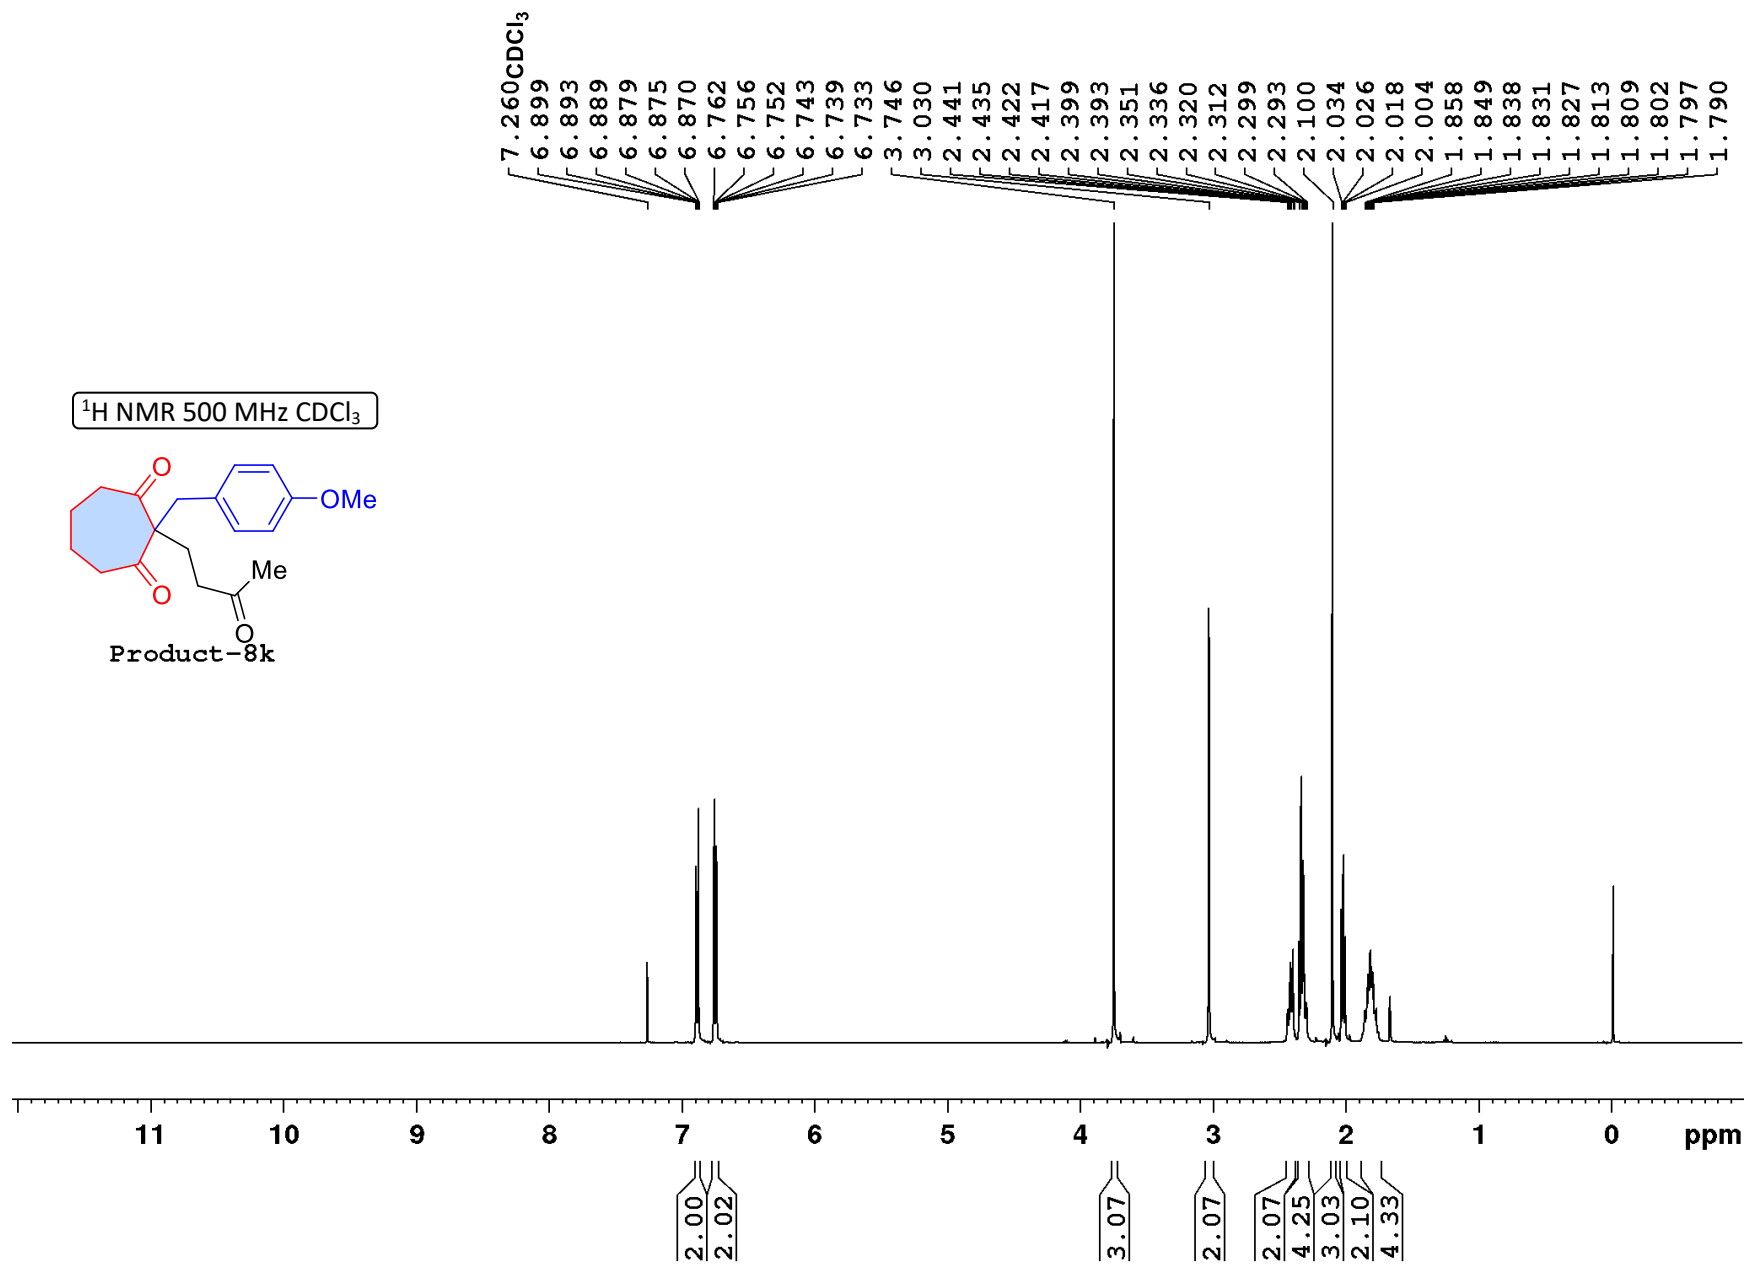

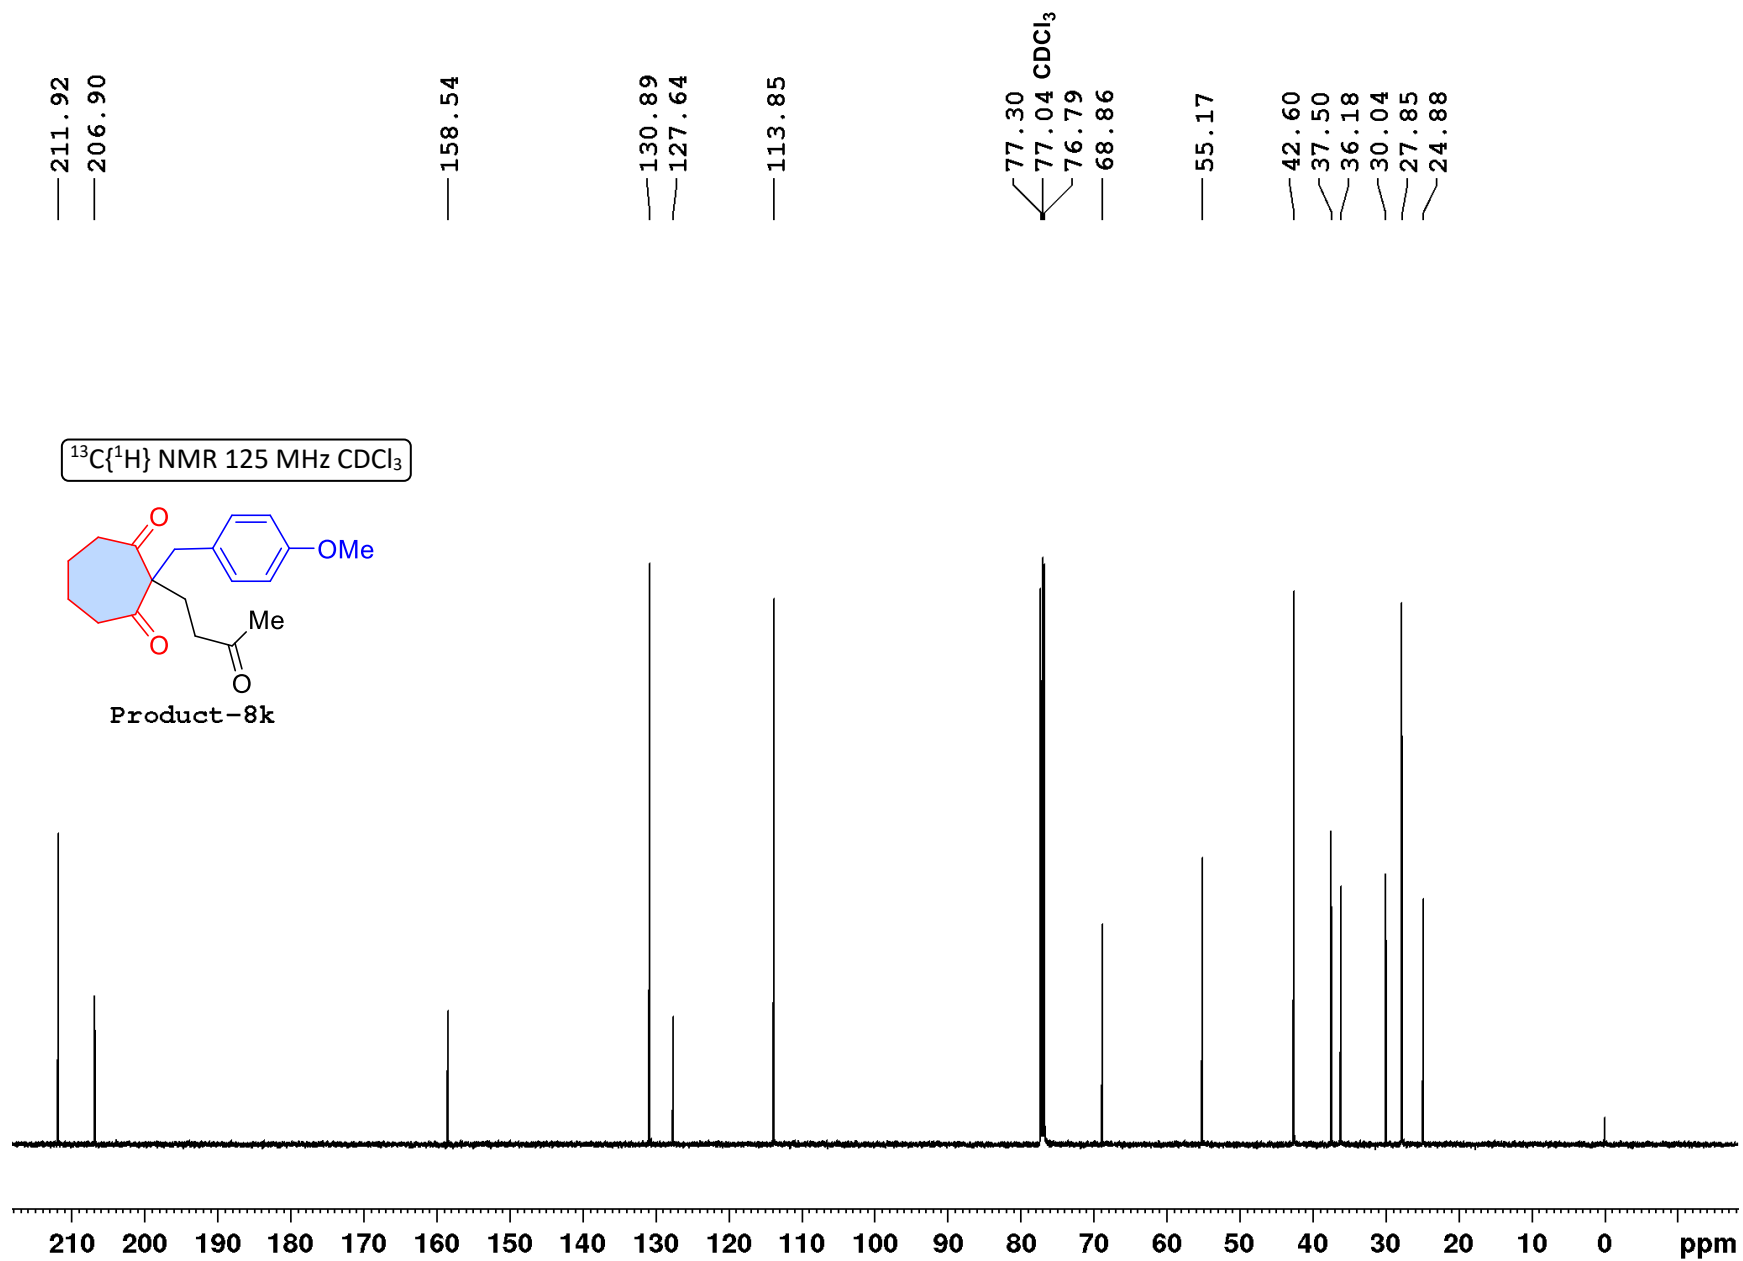

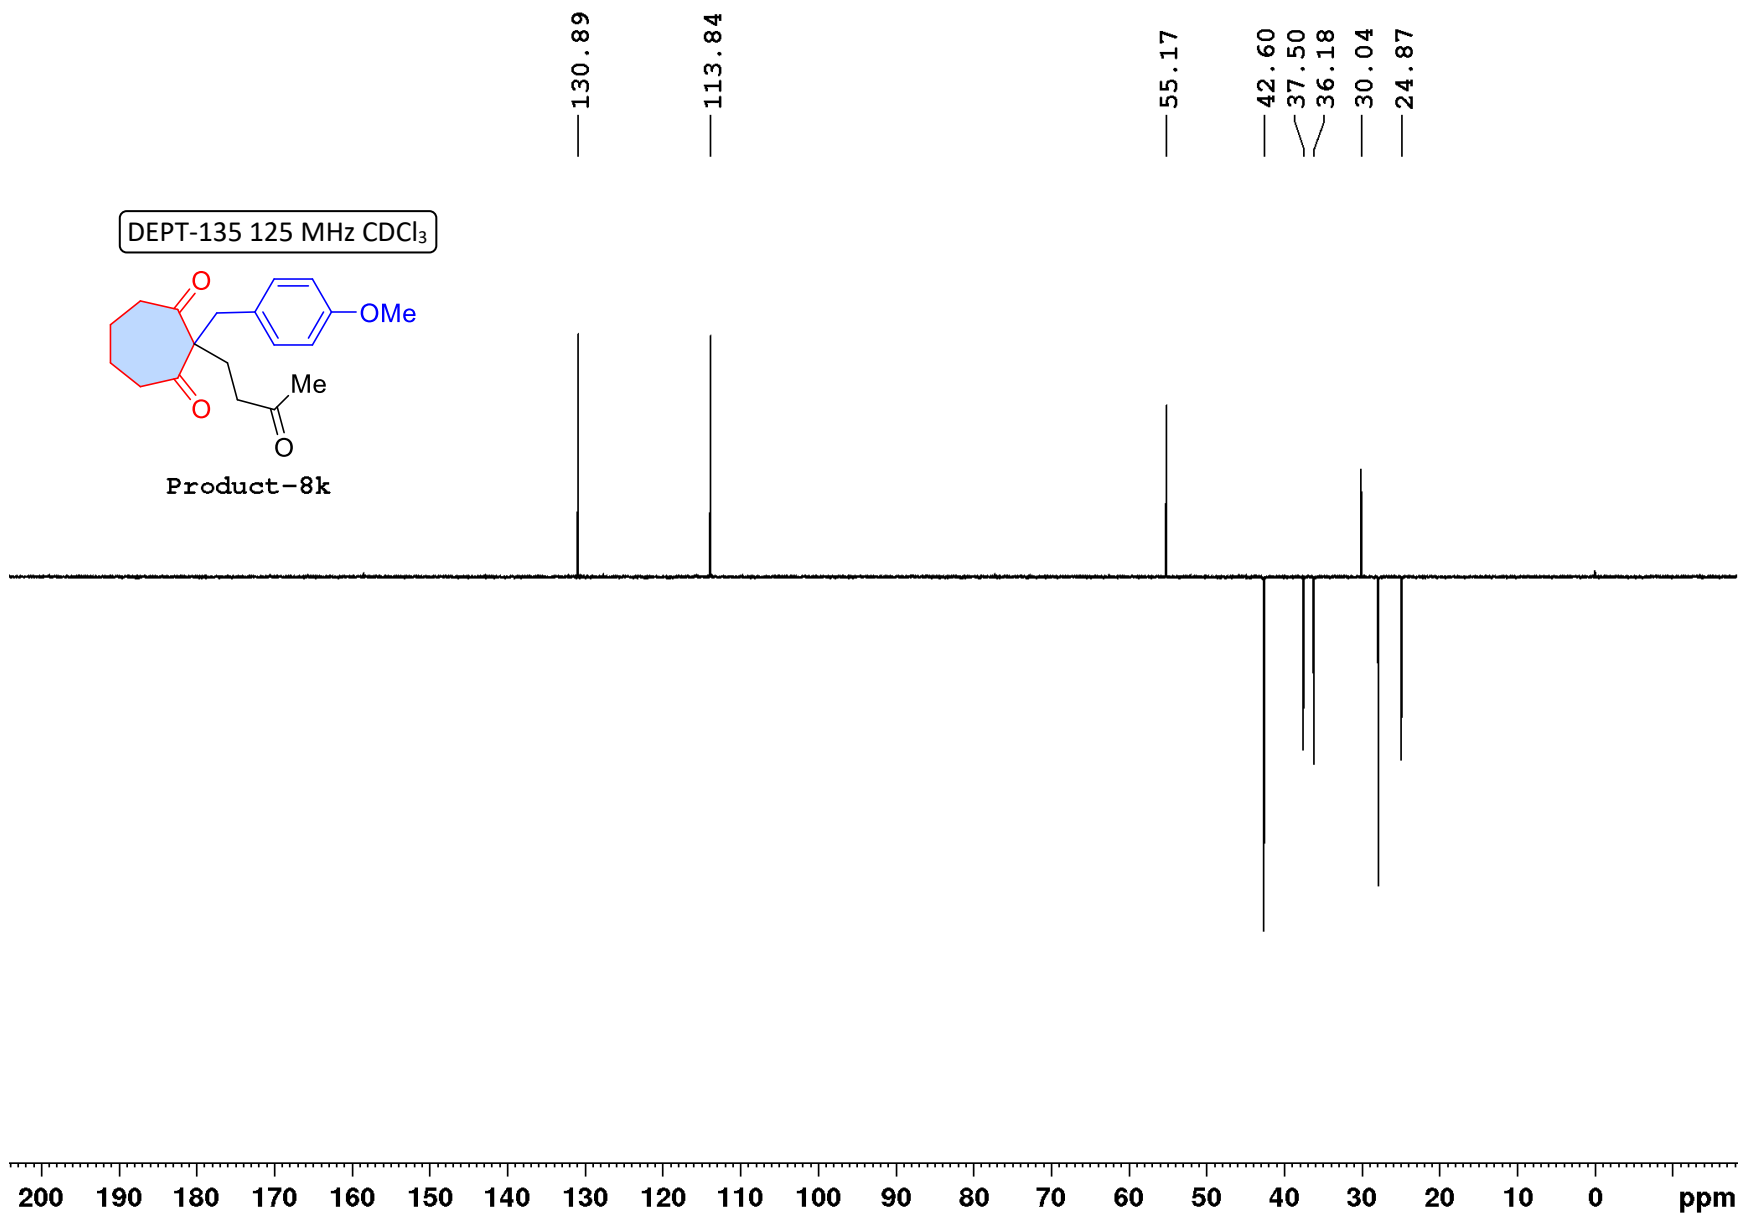



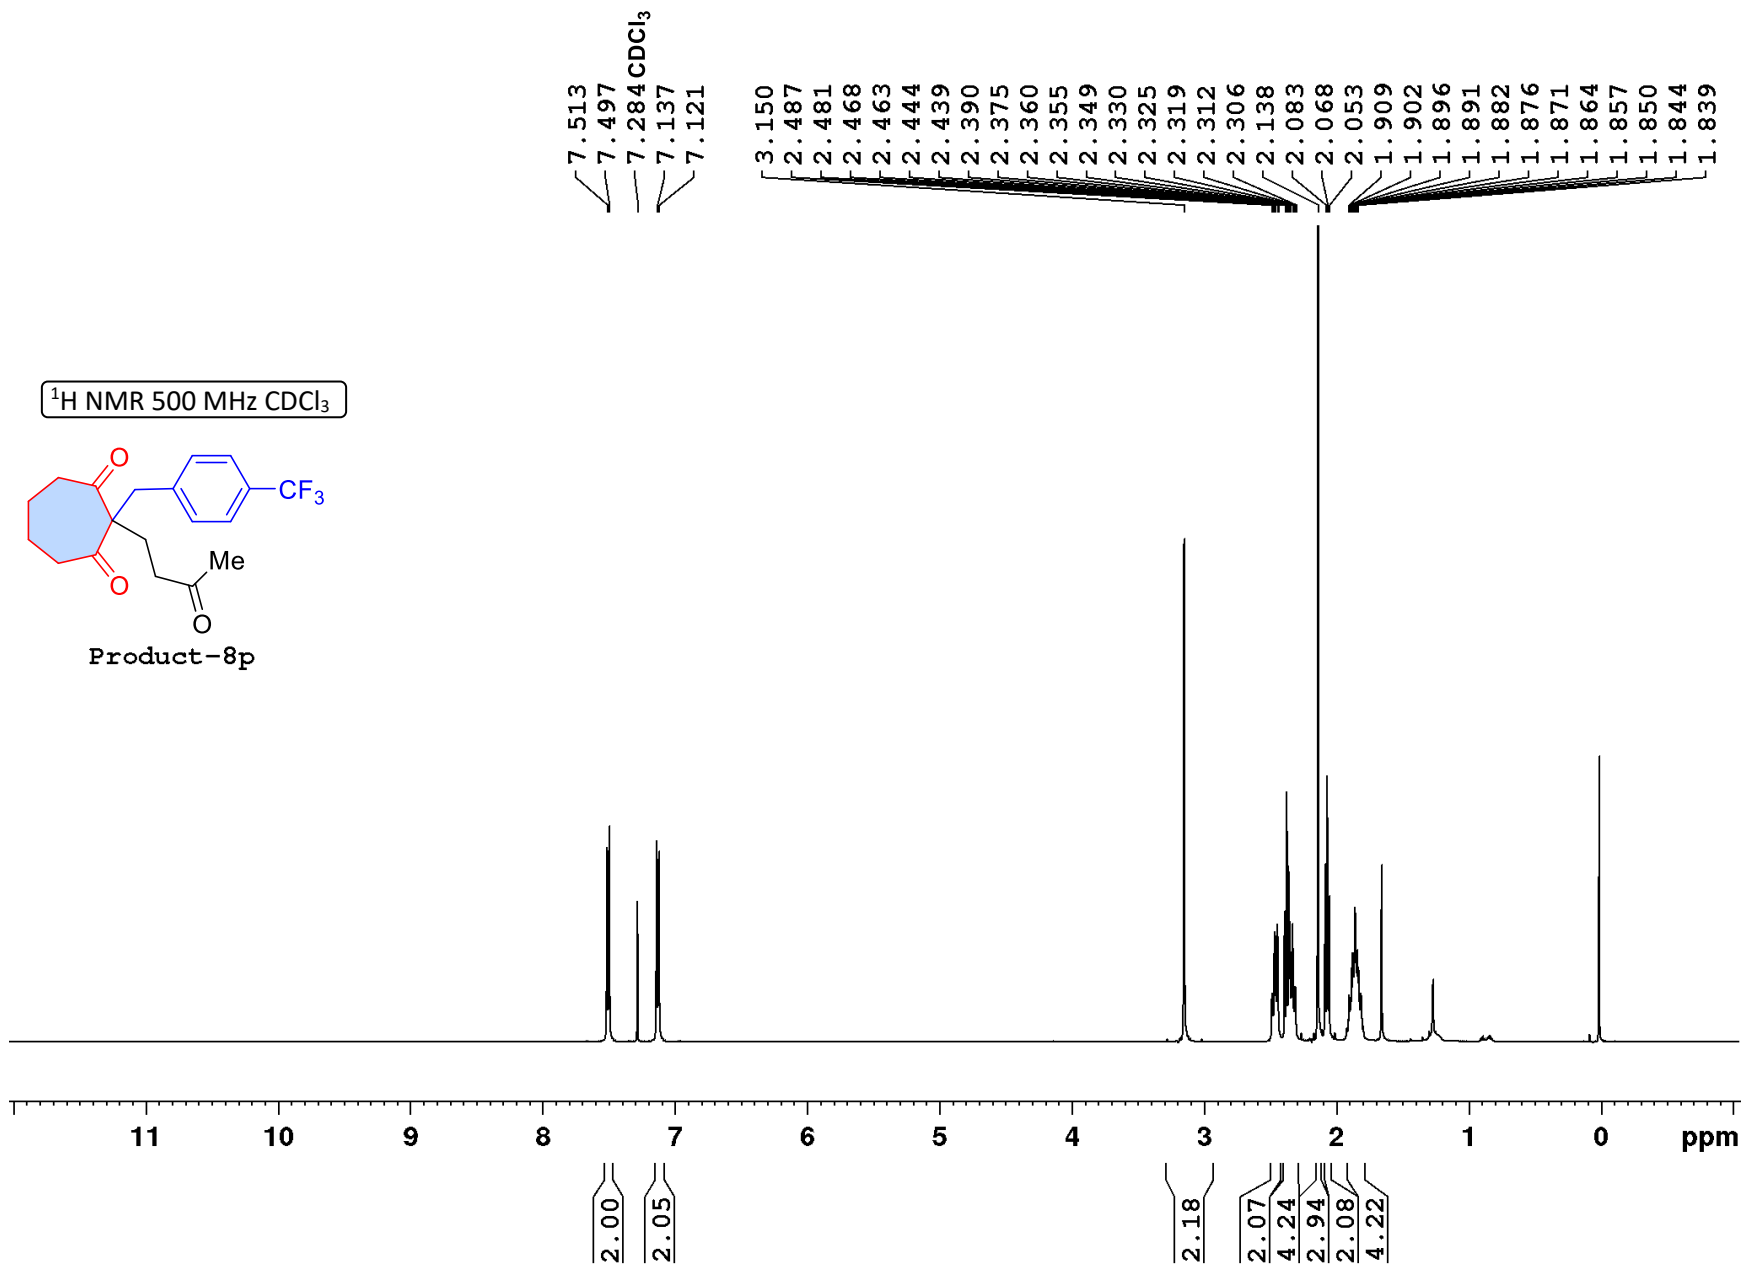

$^{13}\text{C}\{^1\text{H}\}$  NMR 125 MHz  $\text{CDCl}_3$

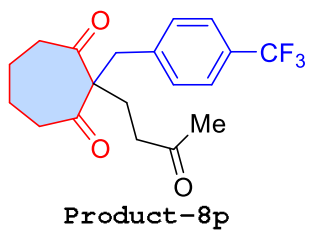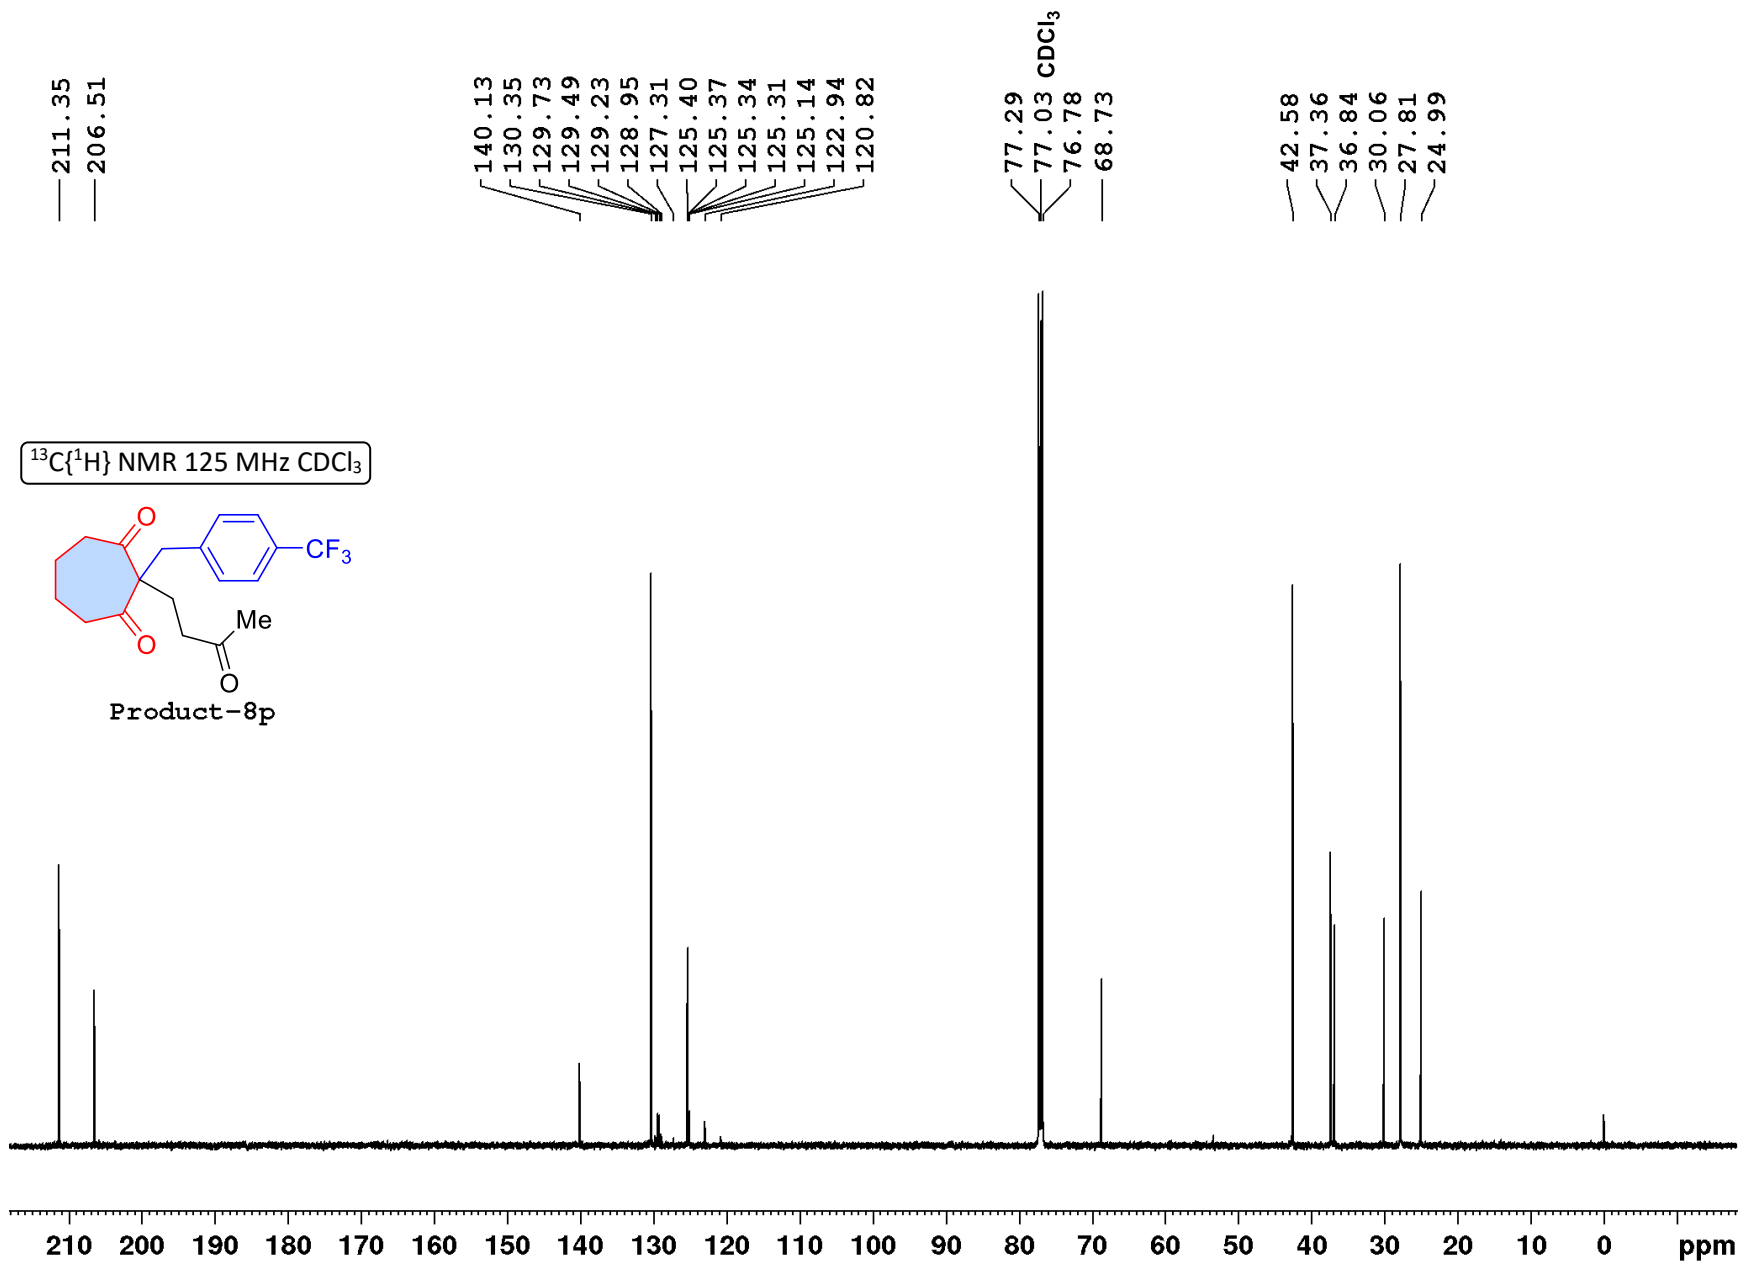

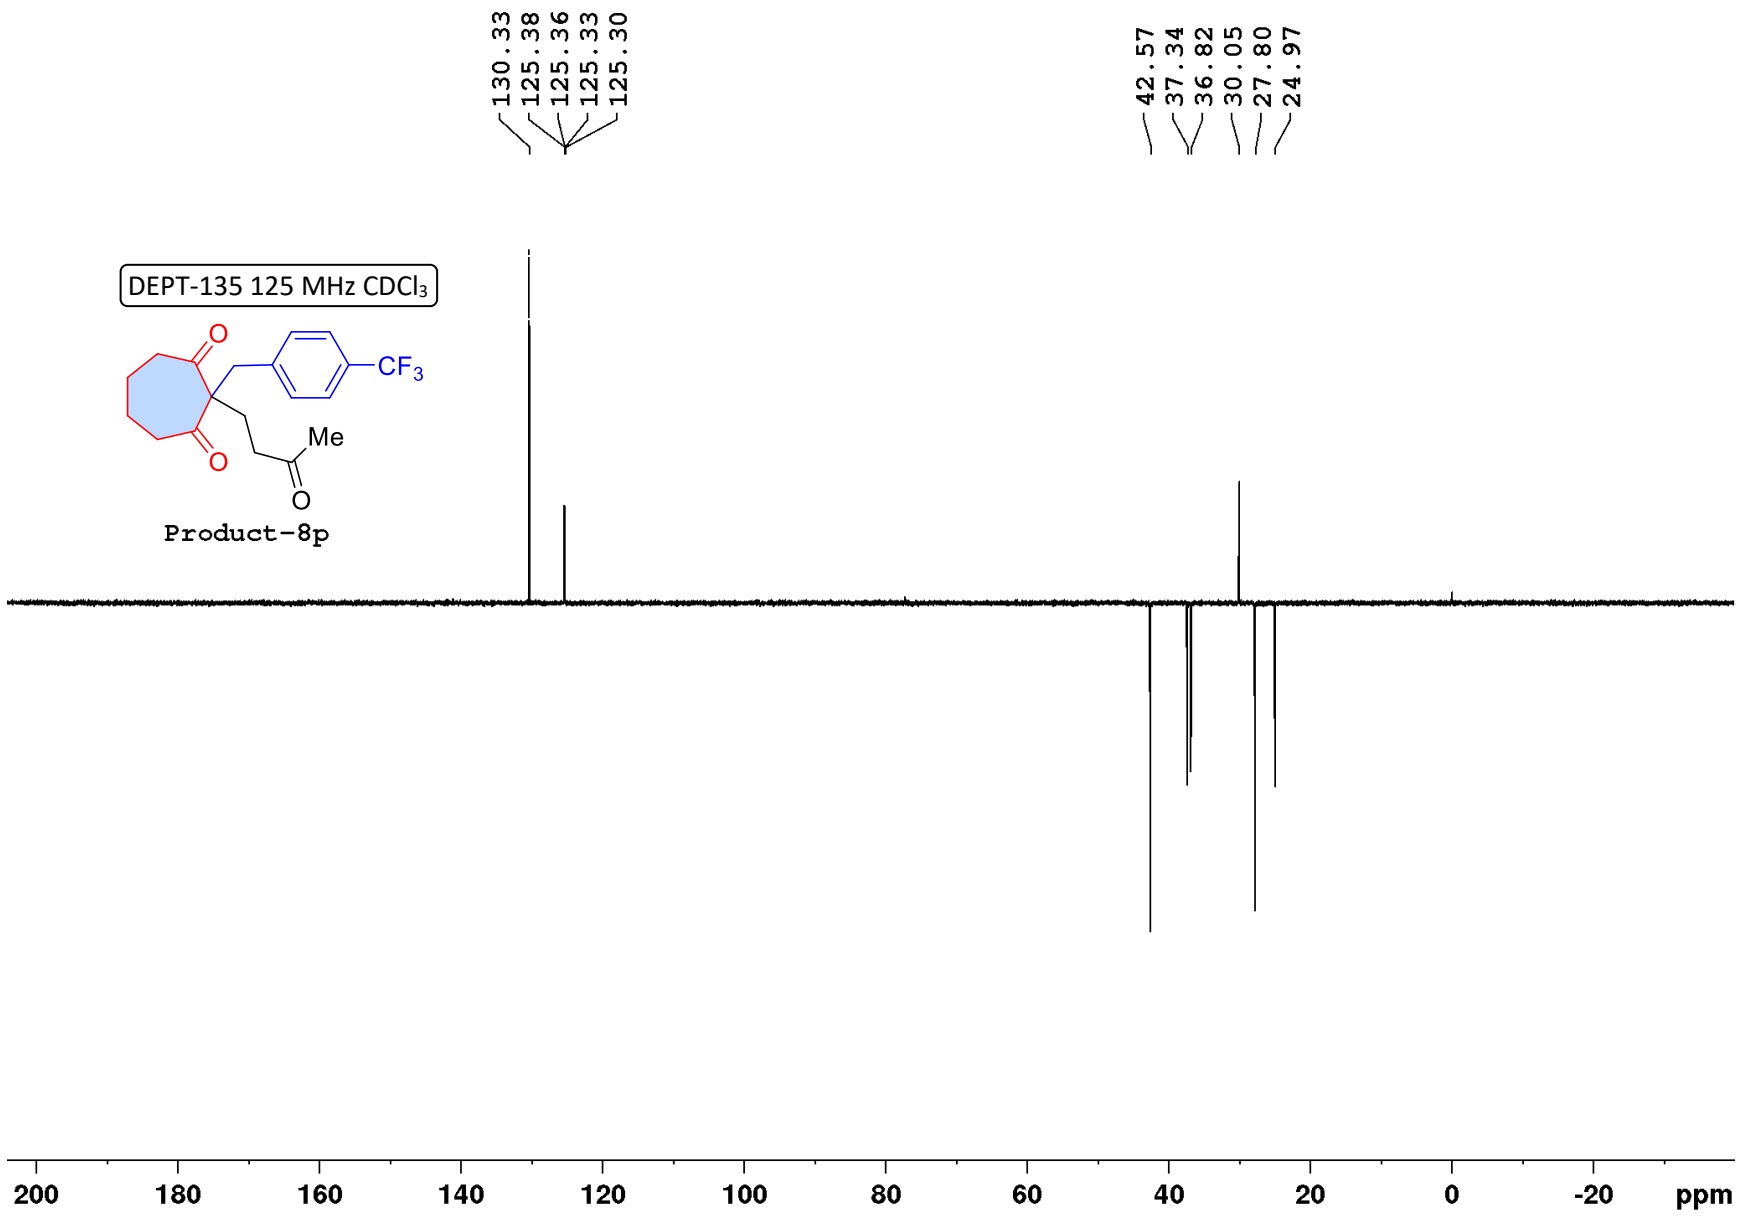

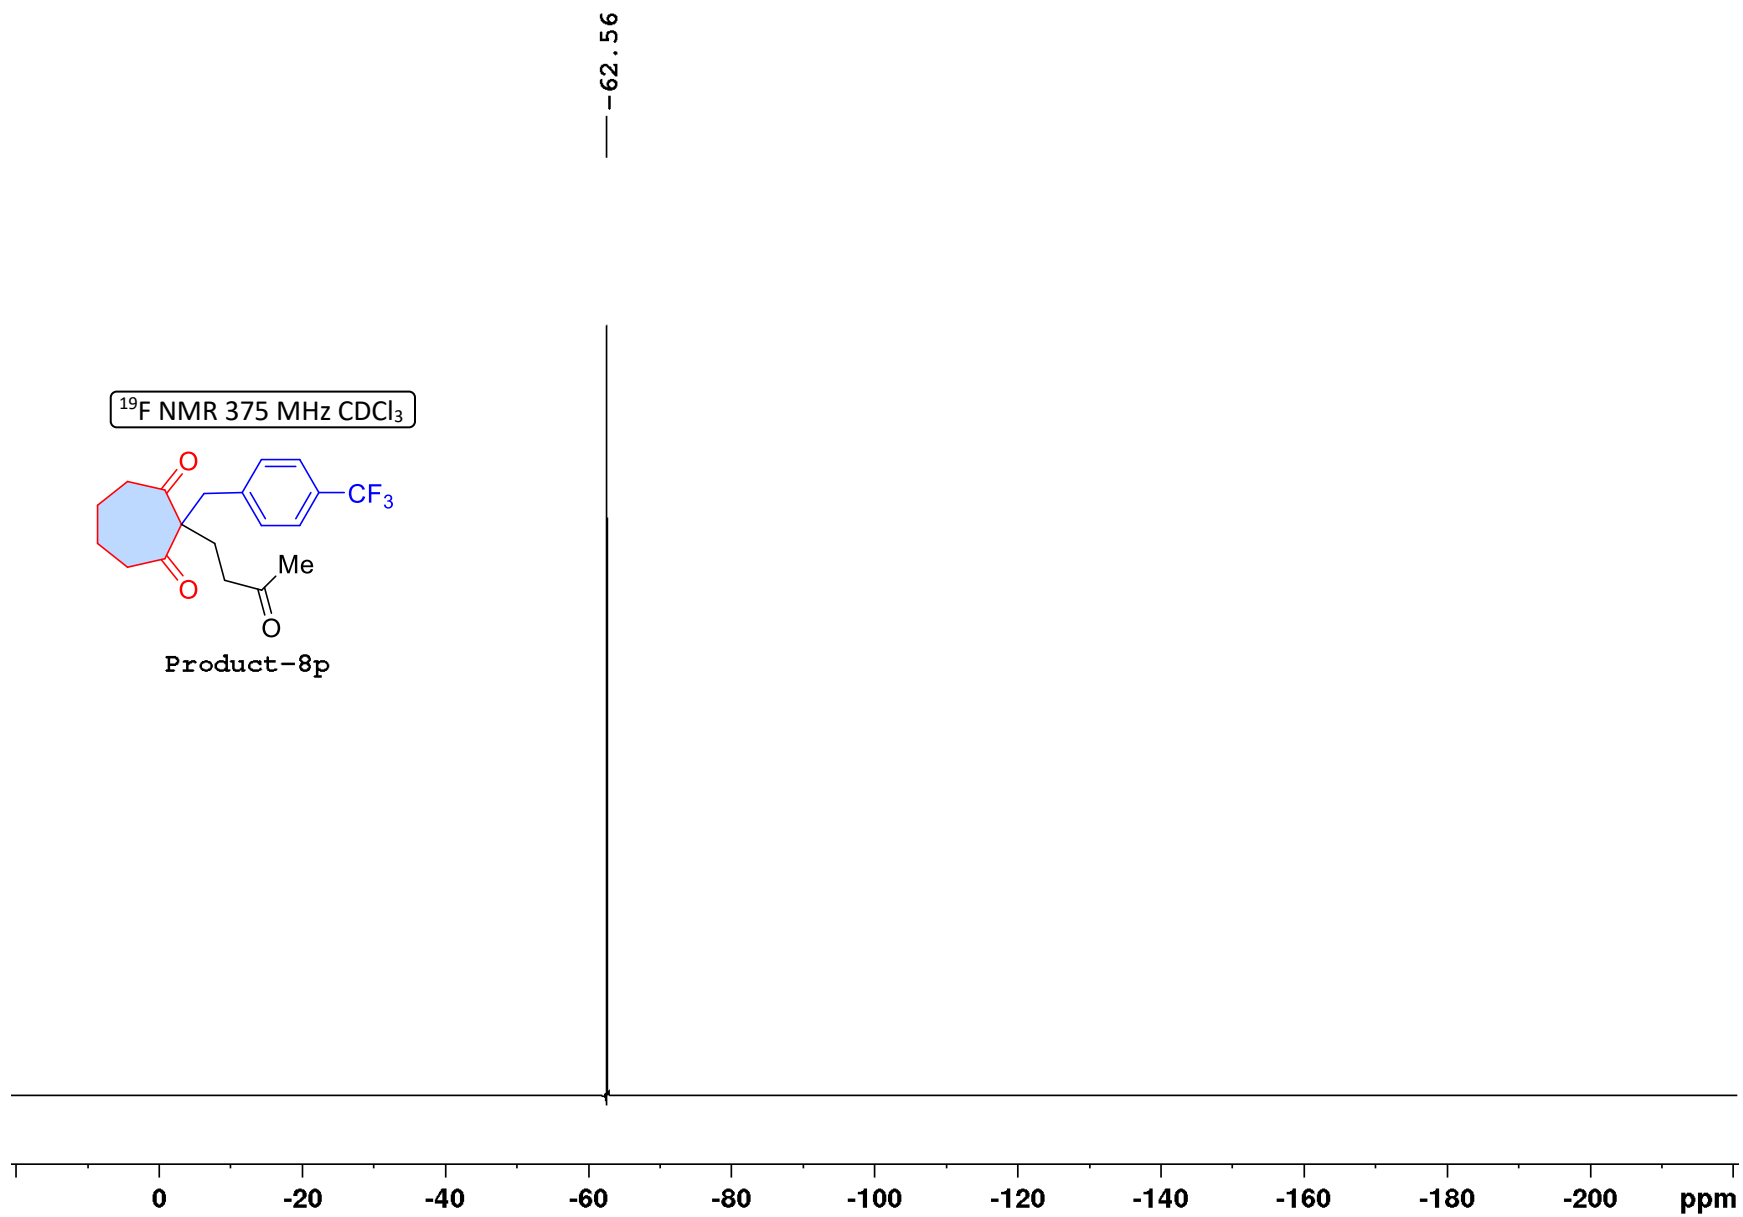

<sup>1</sup>H NMR 500 MHz CDCl<sub>3</sub>

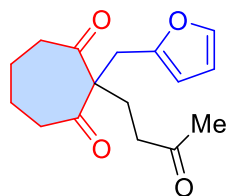

Product-8r

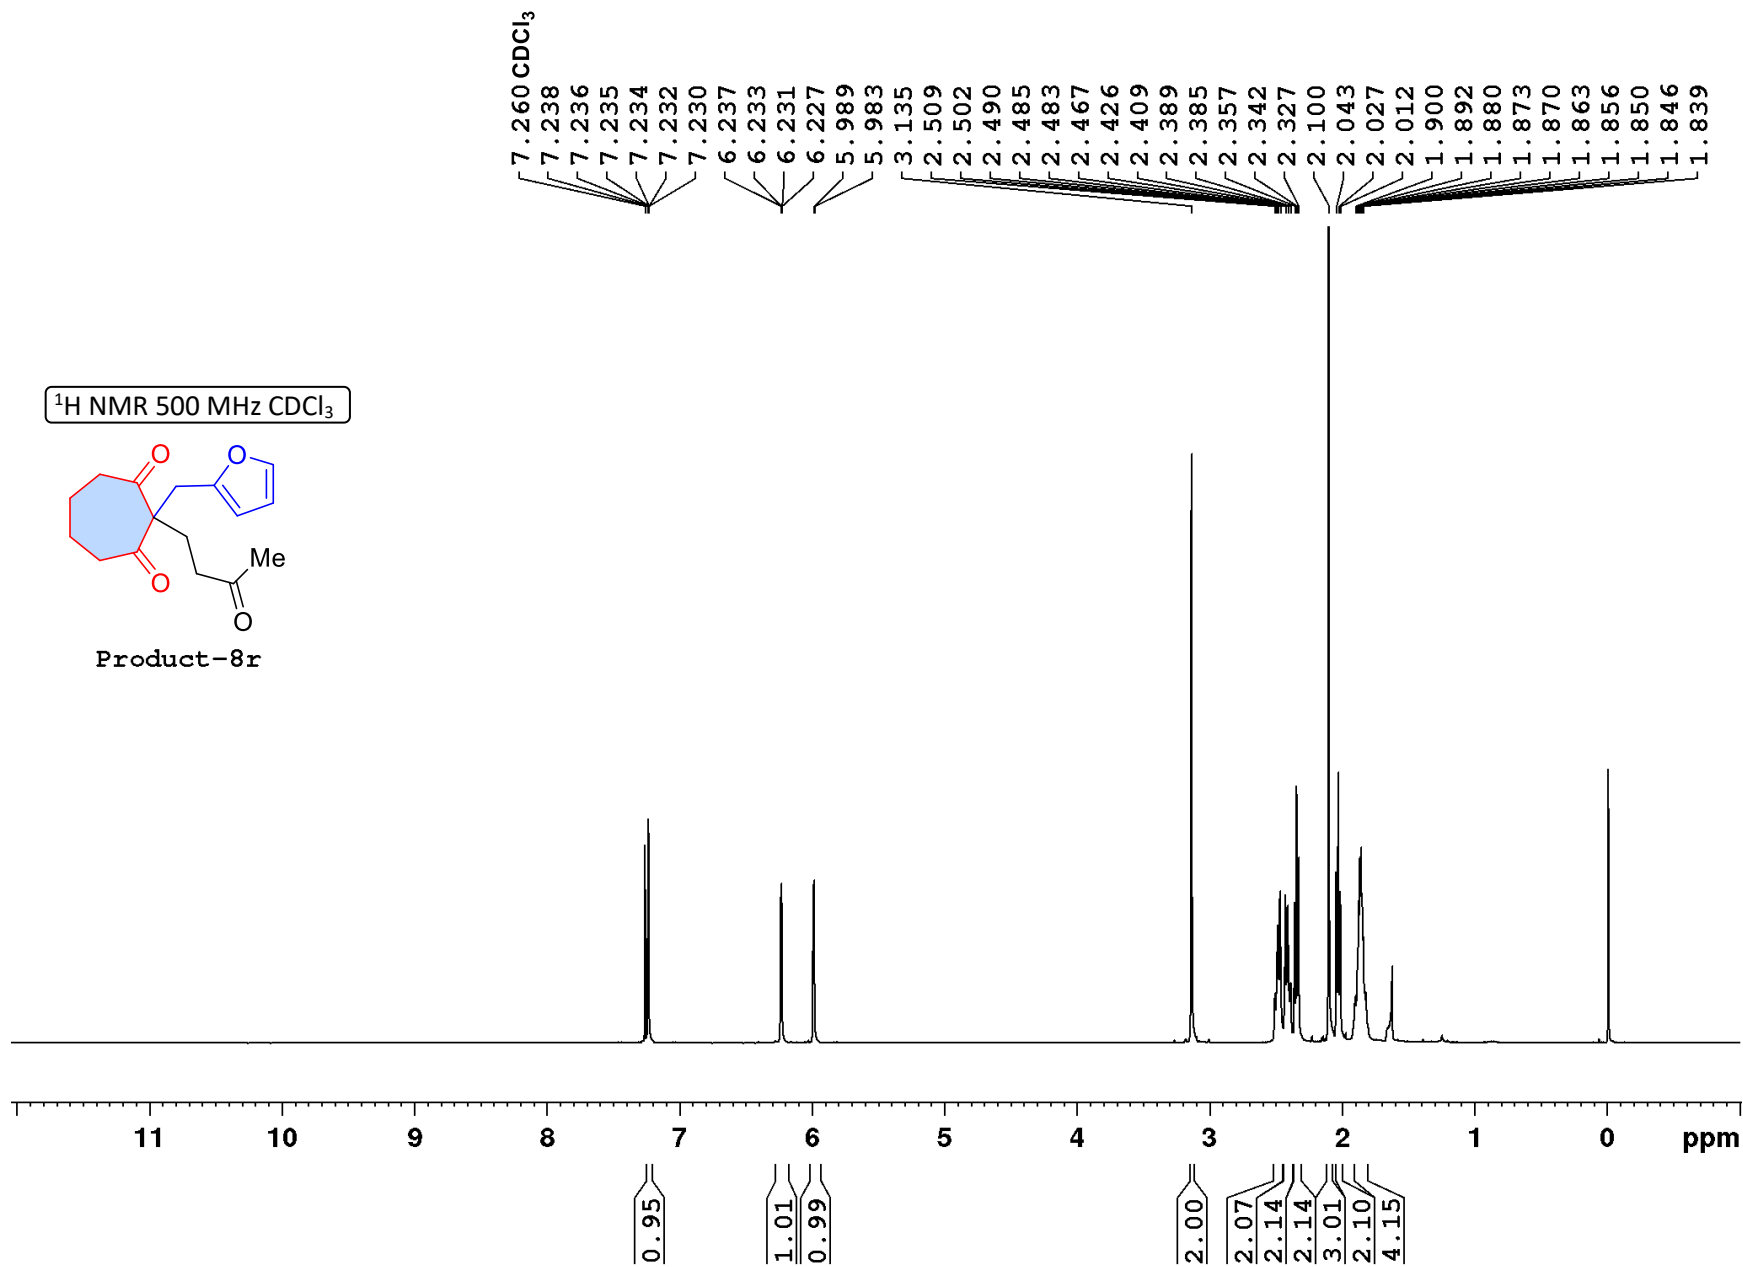

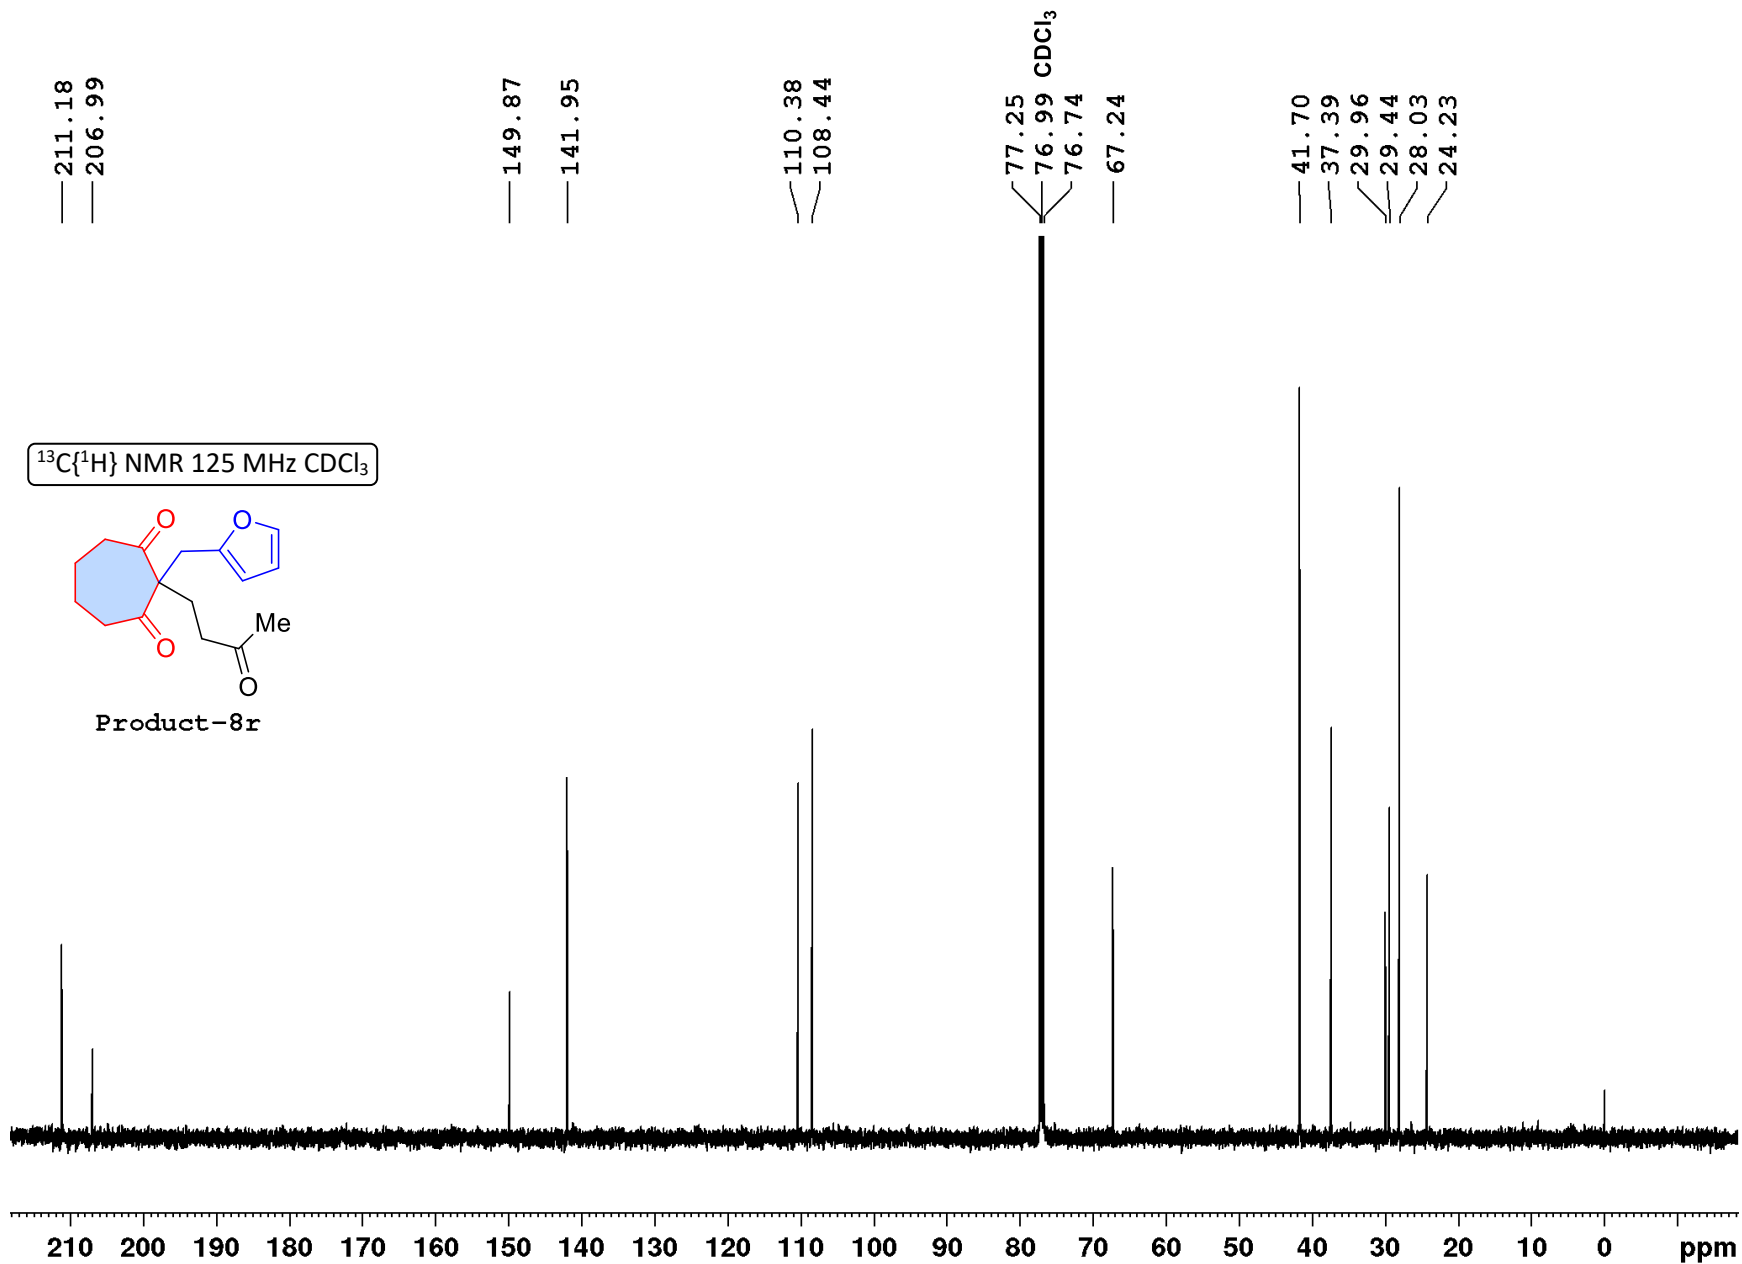

DEPT-135 125 MHz CDCl<sub>3</sub>

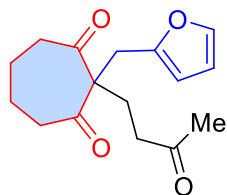

— 142.01

— 110.42  
— 108.48

— 41.74  
— 37.43  
— 30.02  
— 29.46  
— 28.09  
— 24.23

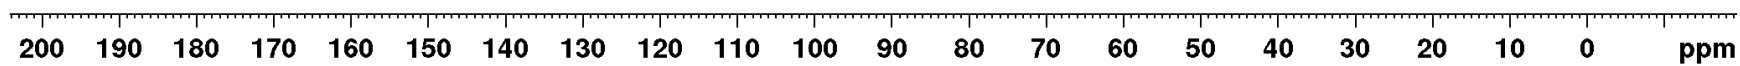

$^1\text{H}$  NMR 500 MHz  $\text{CDCl}_3$

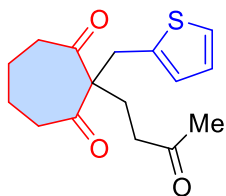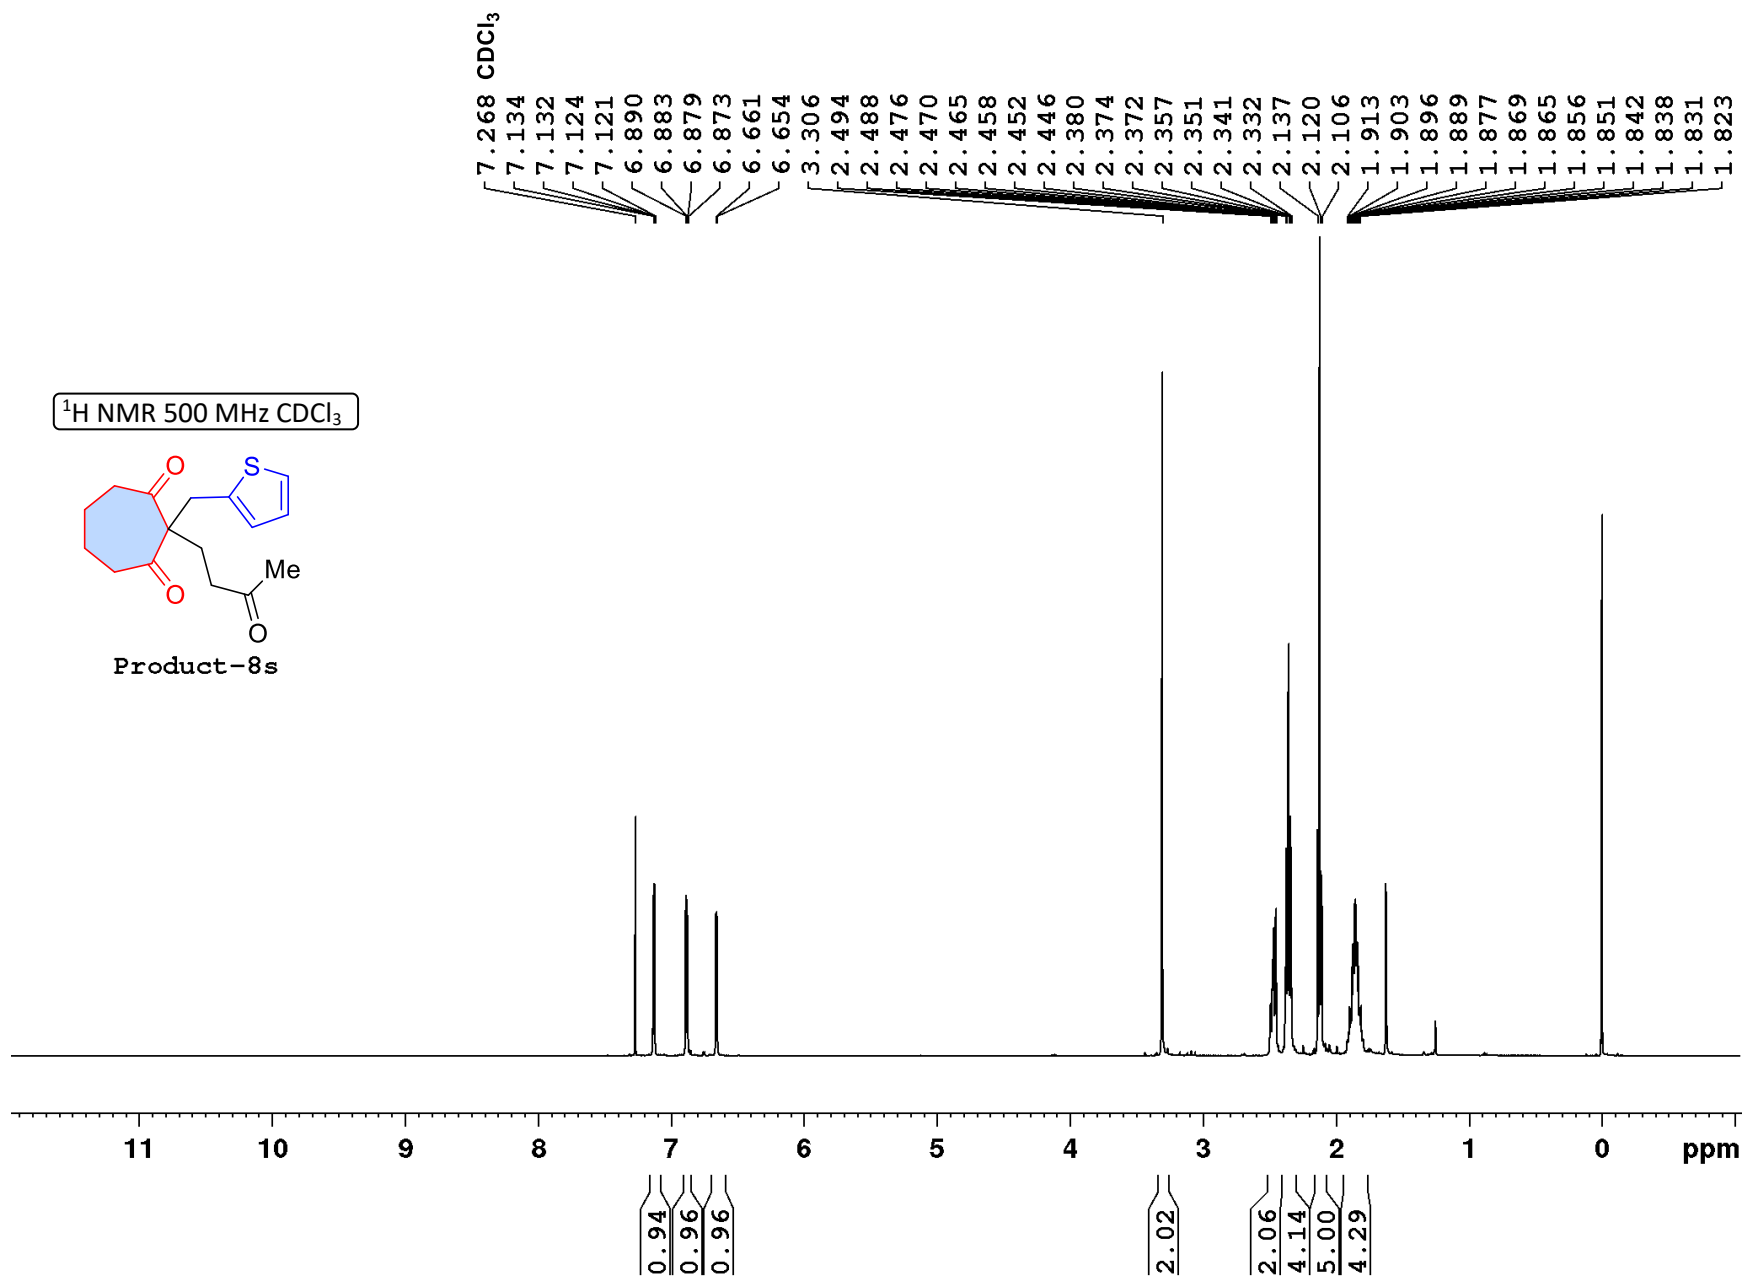



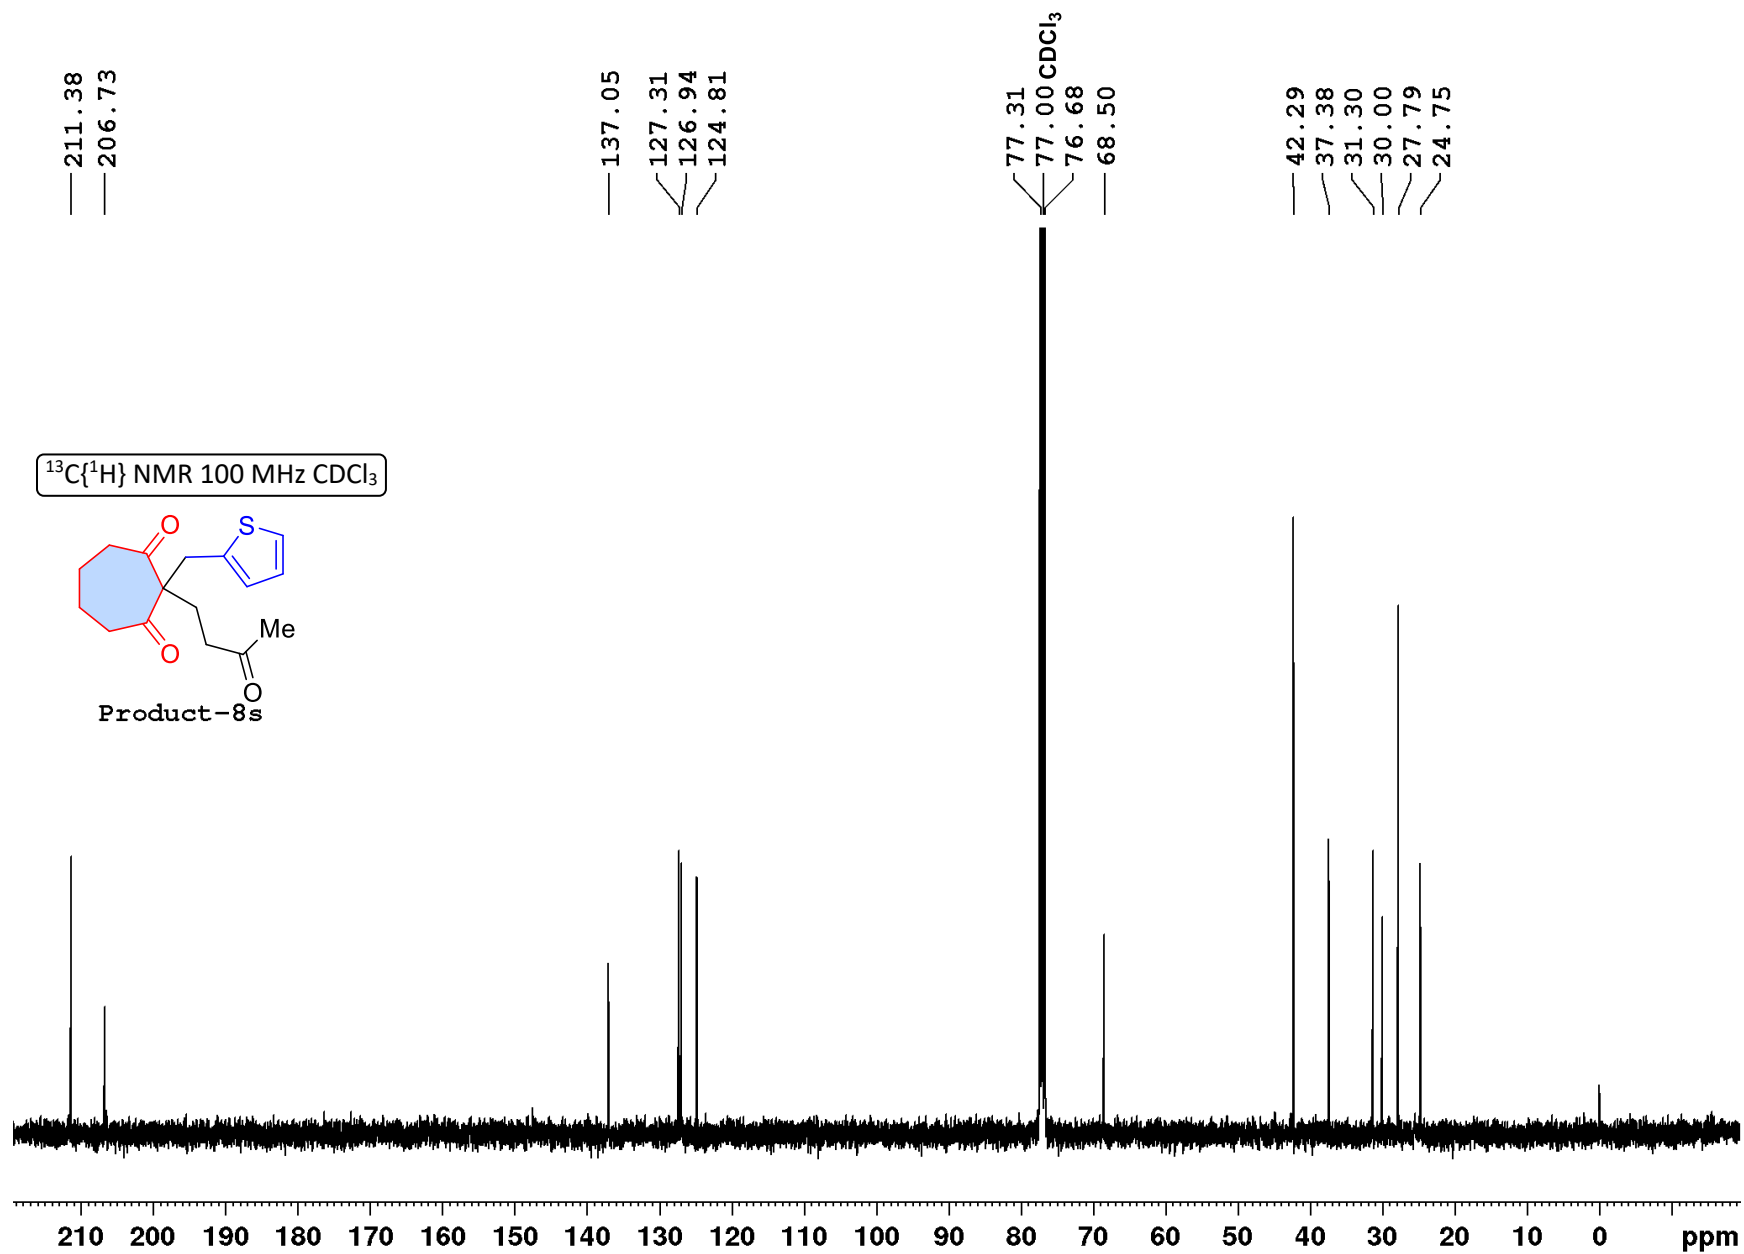

DEPT-135 100 MHz CDCl<sub>3</sub>

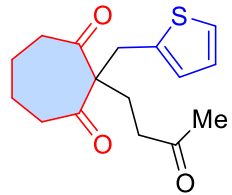

Product-8s

127.35  
126.98  
124.85

42.32  
37.41  
31.30  
30.07  
27.85  
24.73

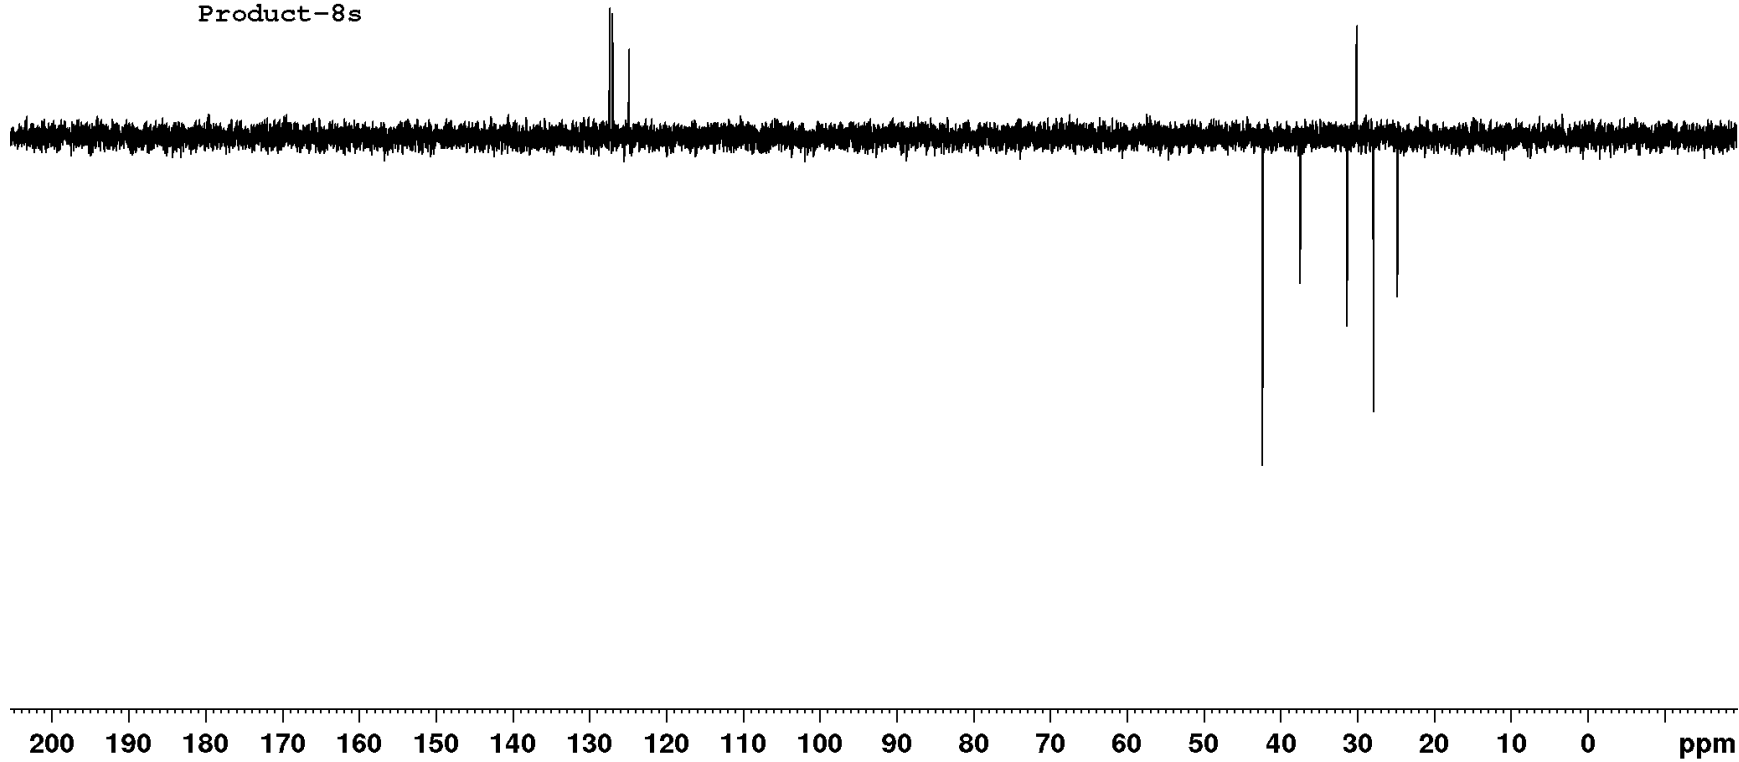

<sup>1</sup>H NMR 500 MHz CDCl<sub>3</sub>

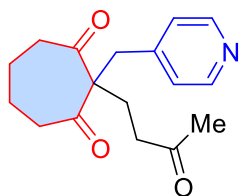

Product-8u

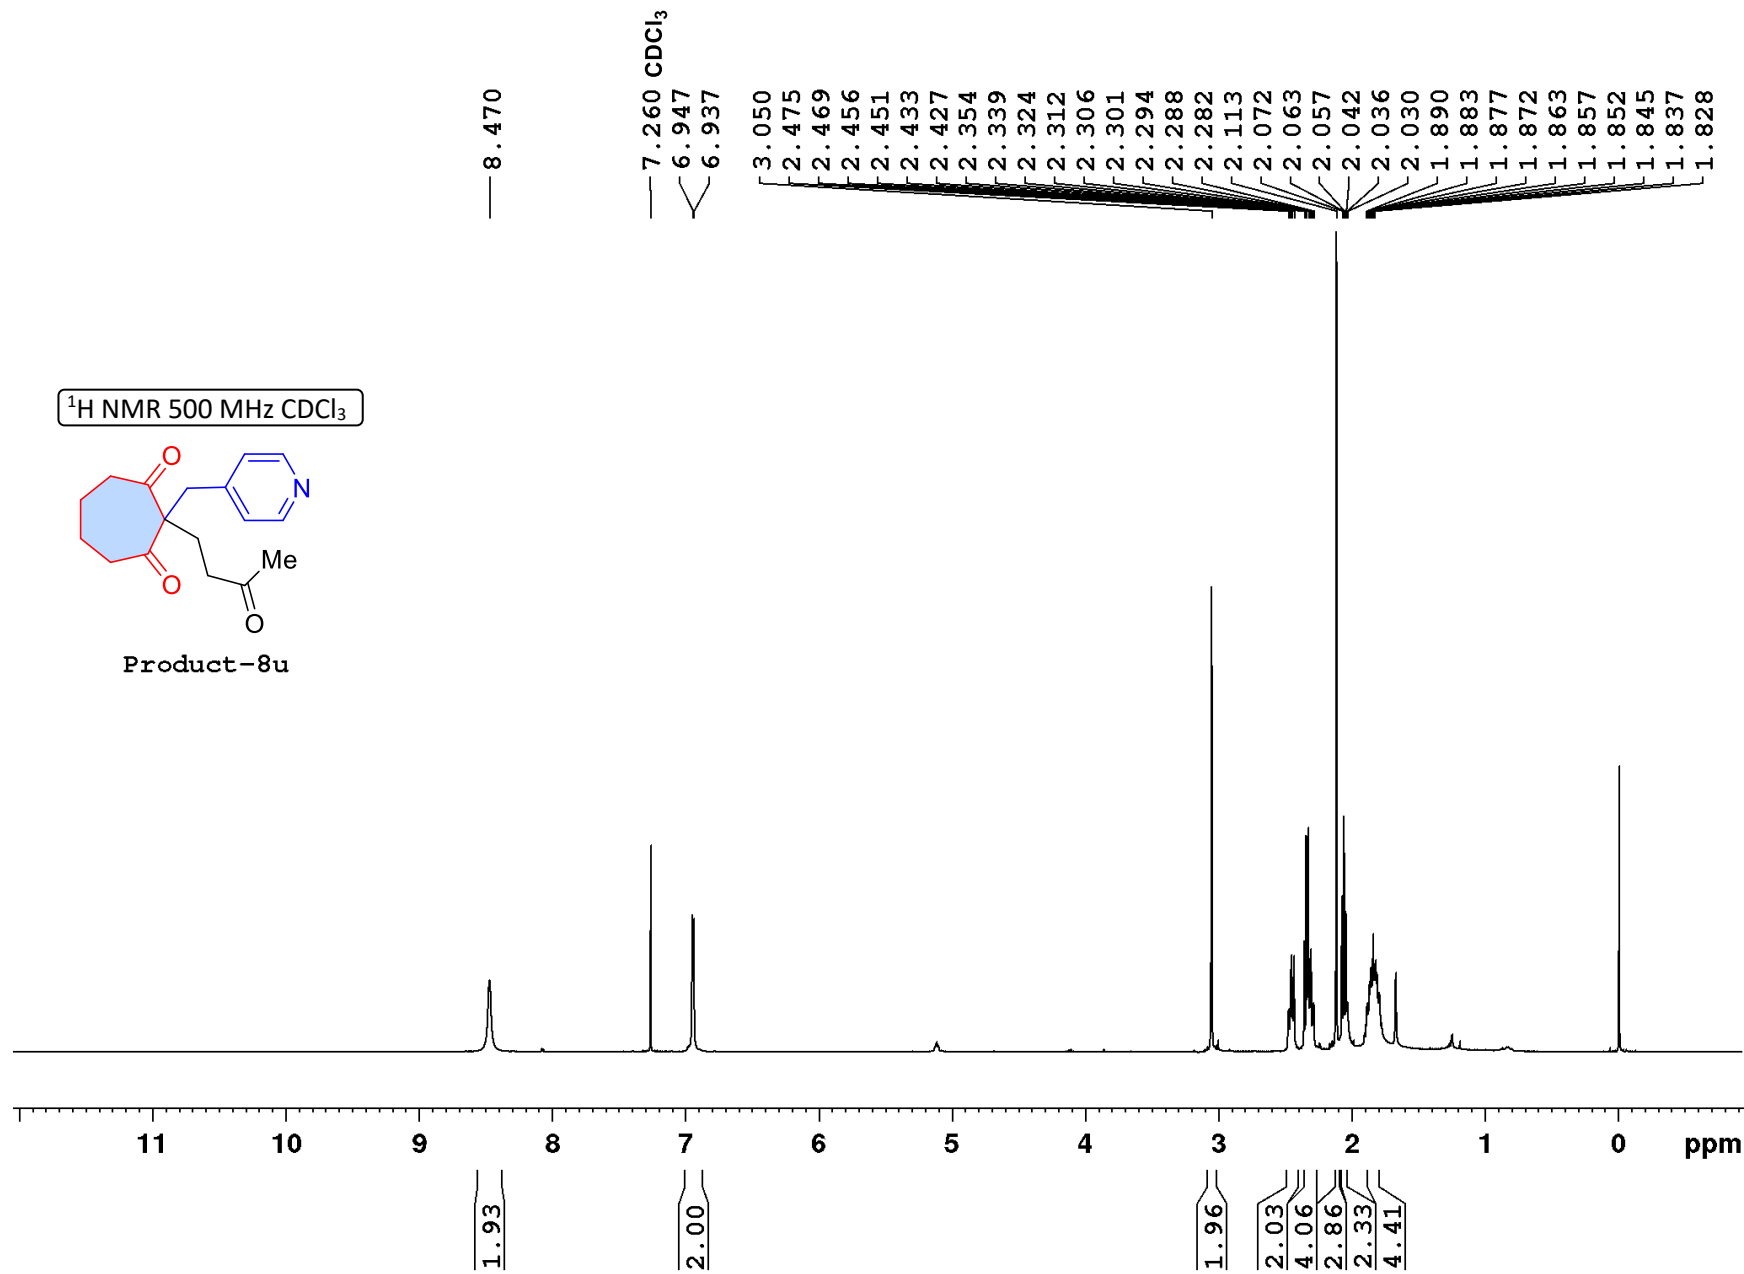

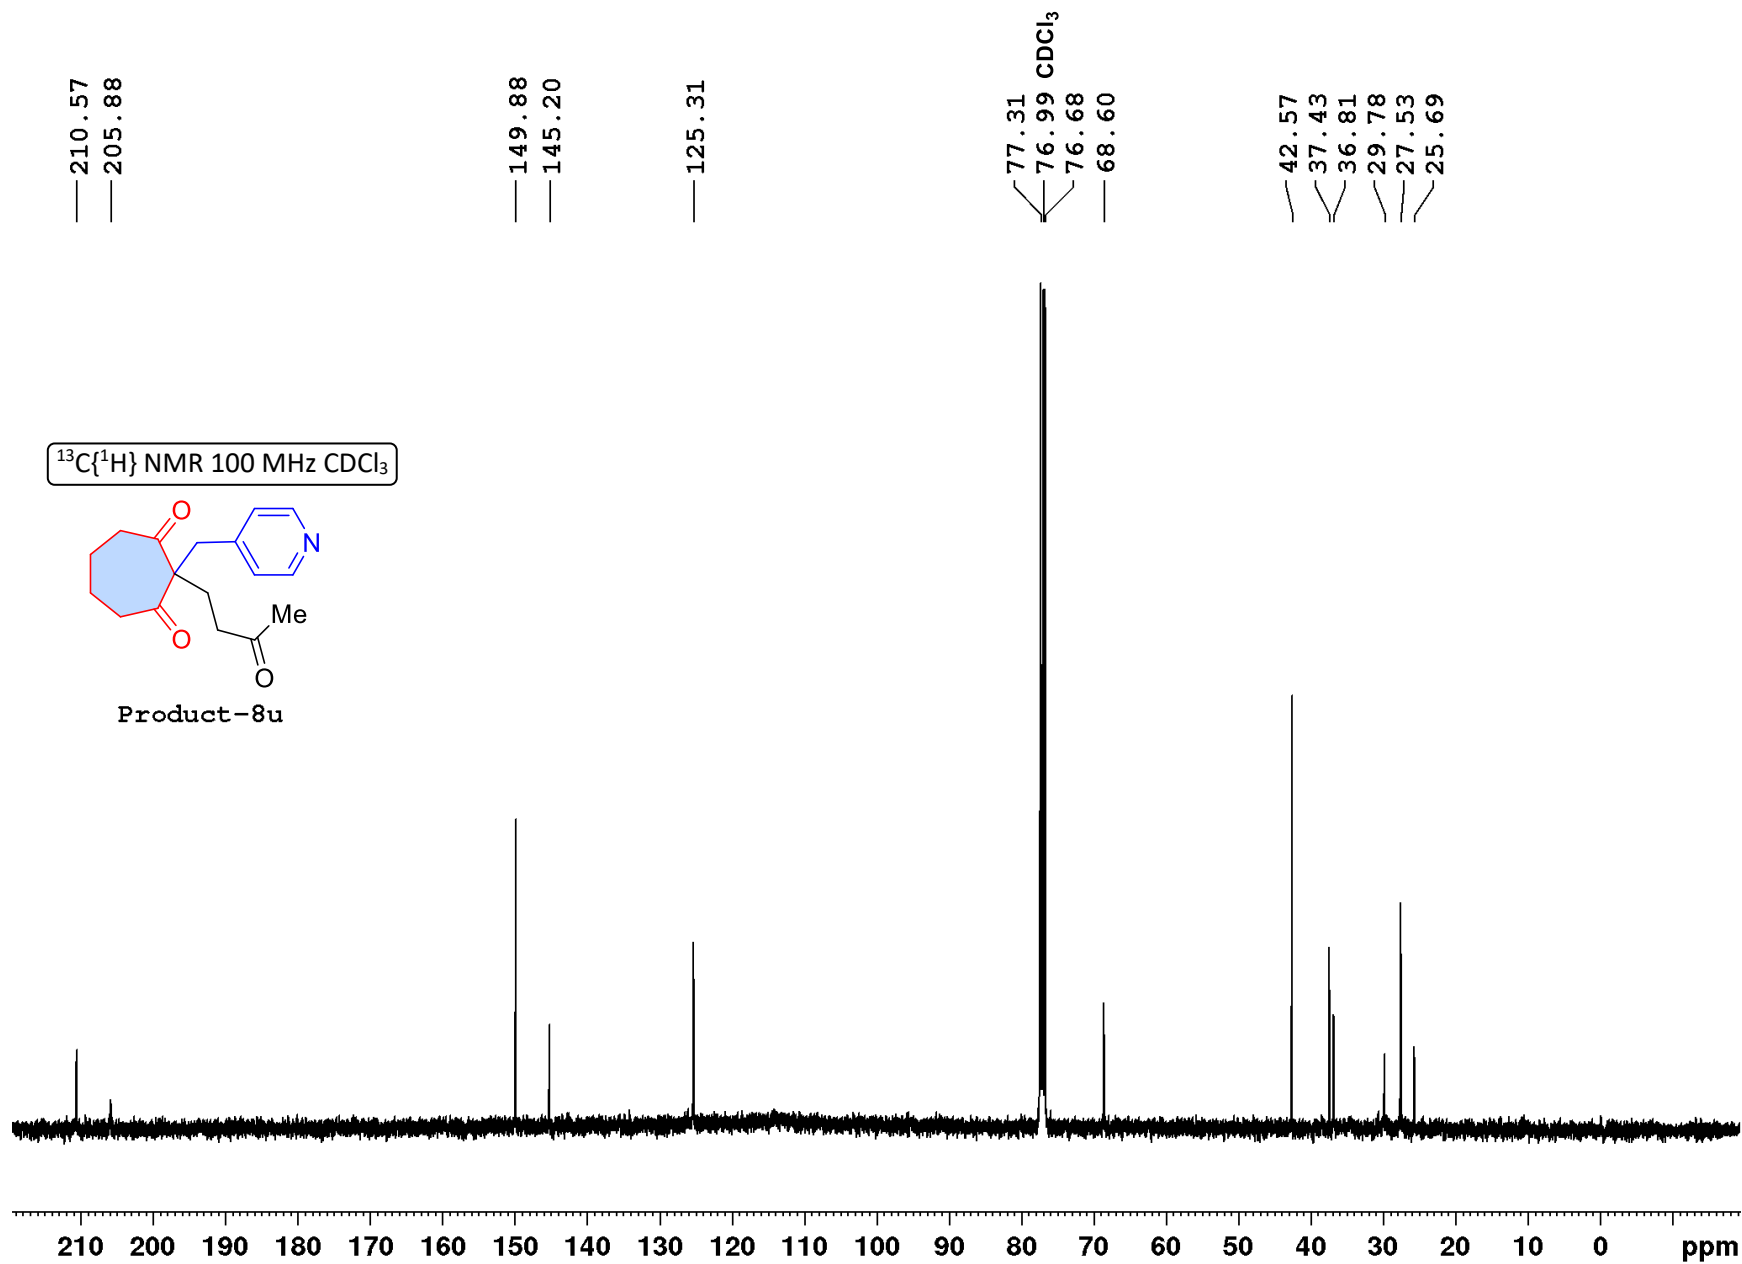

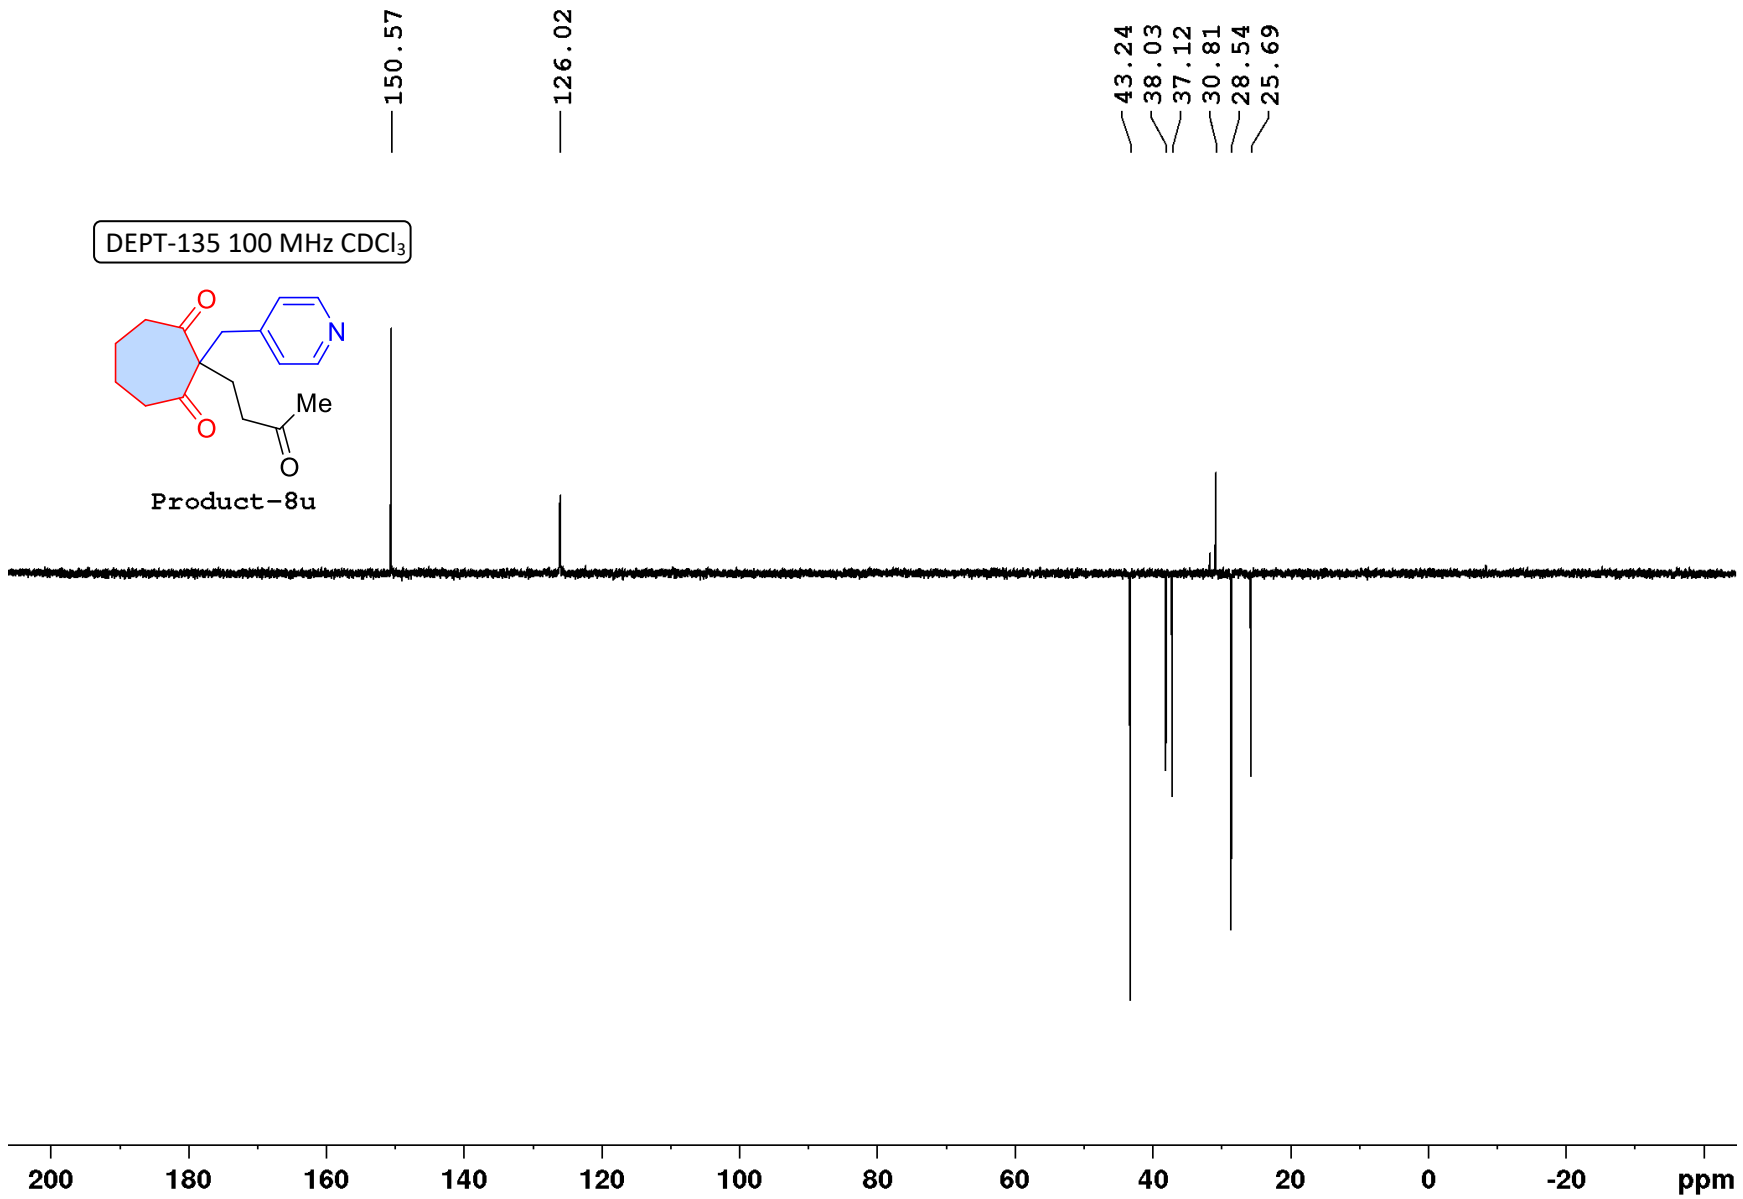

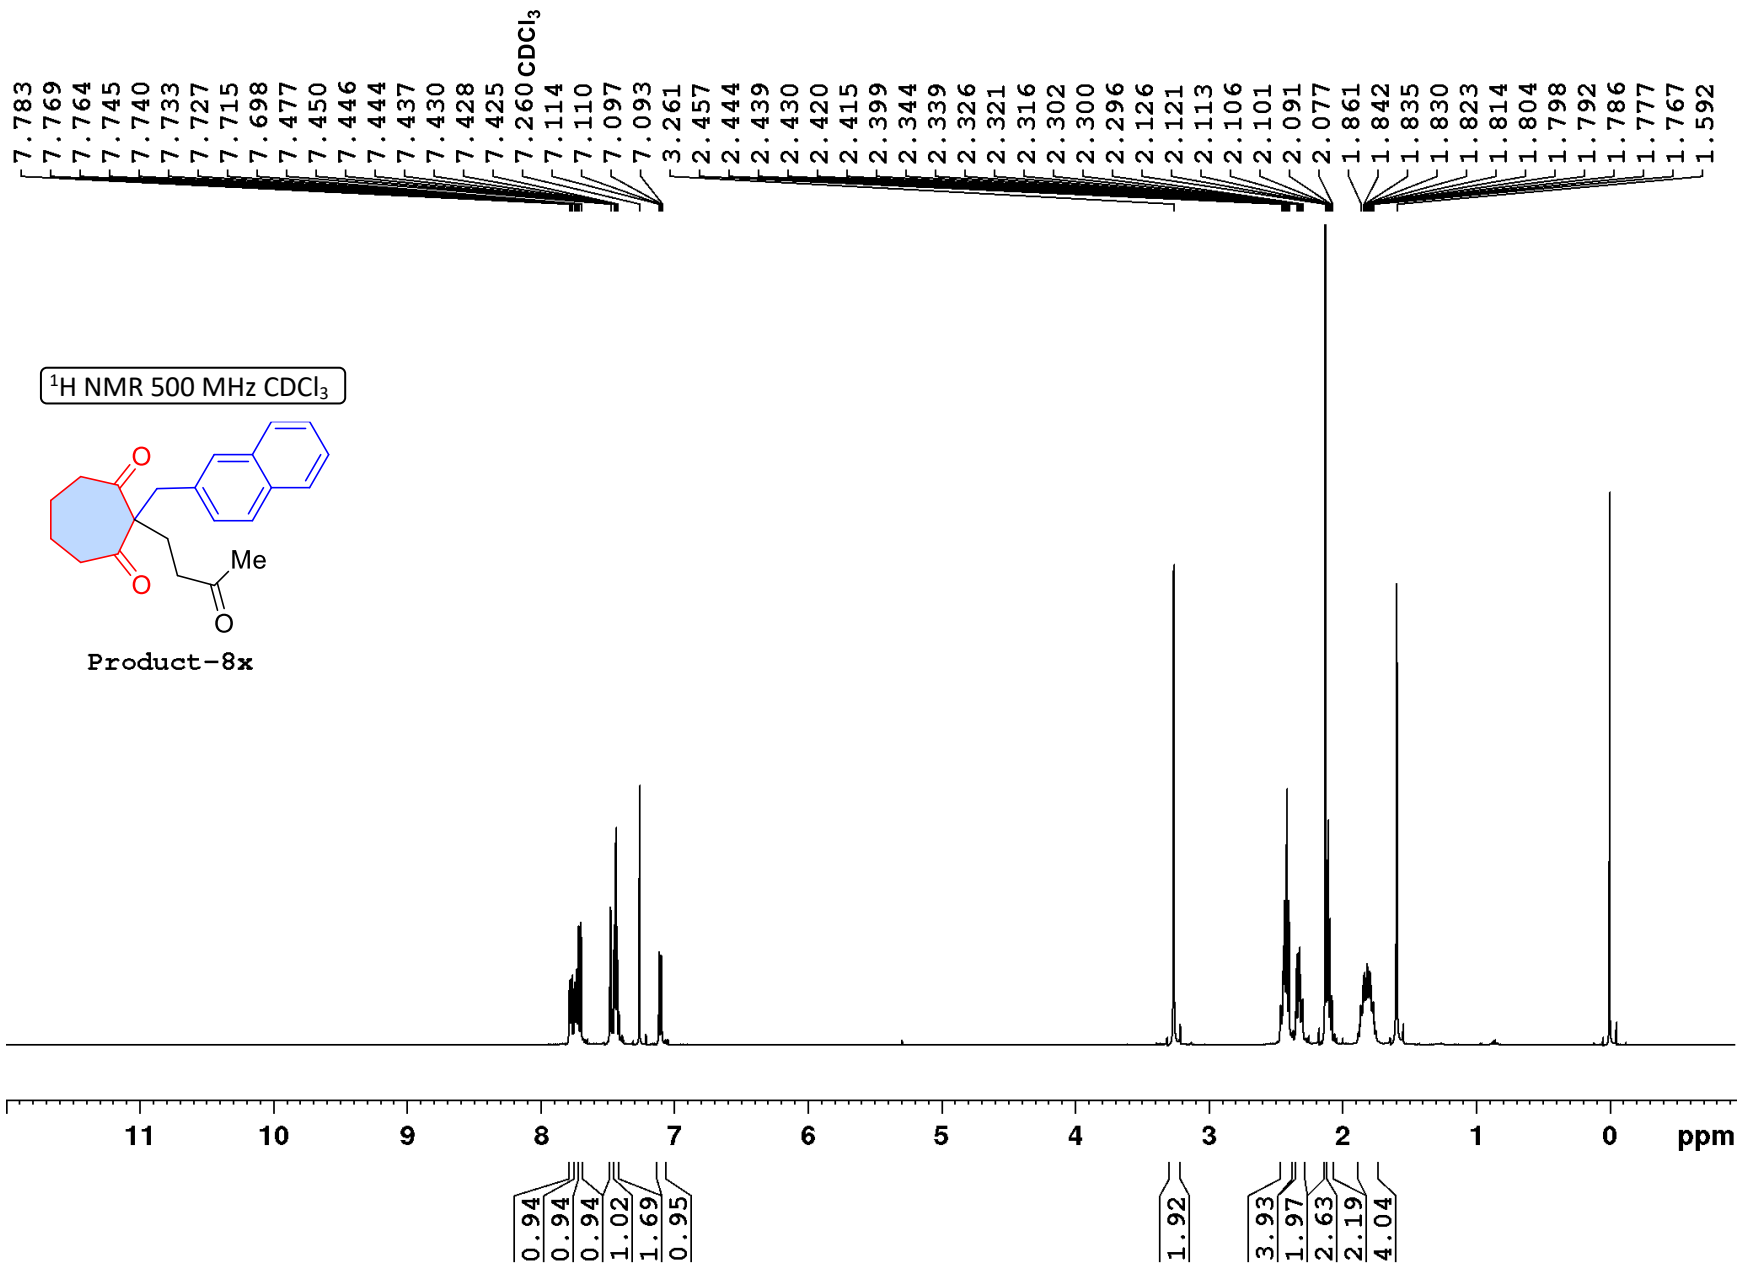

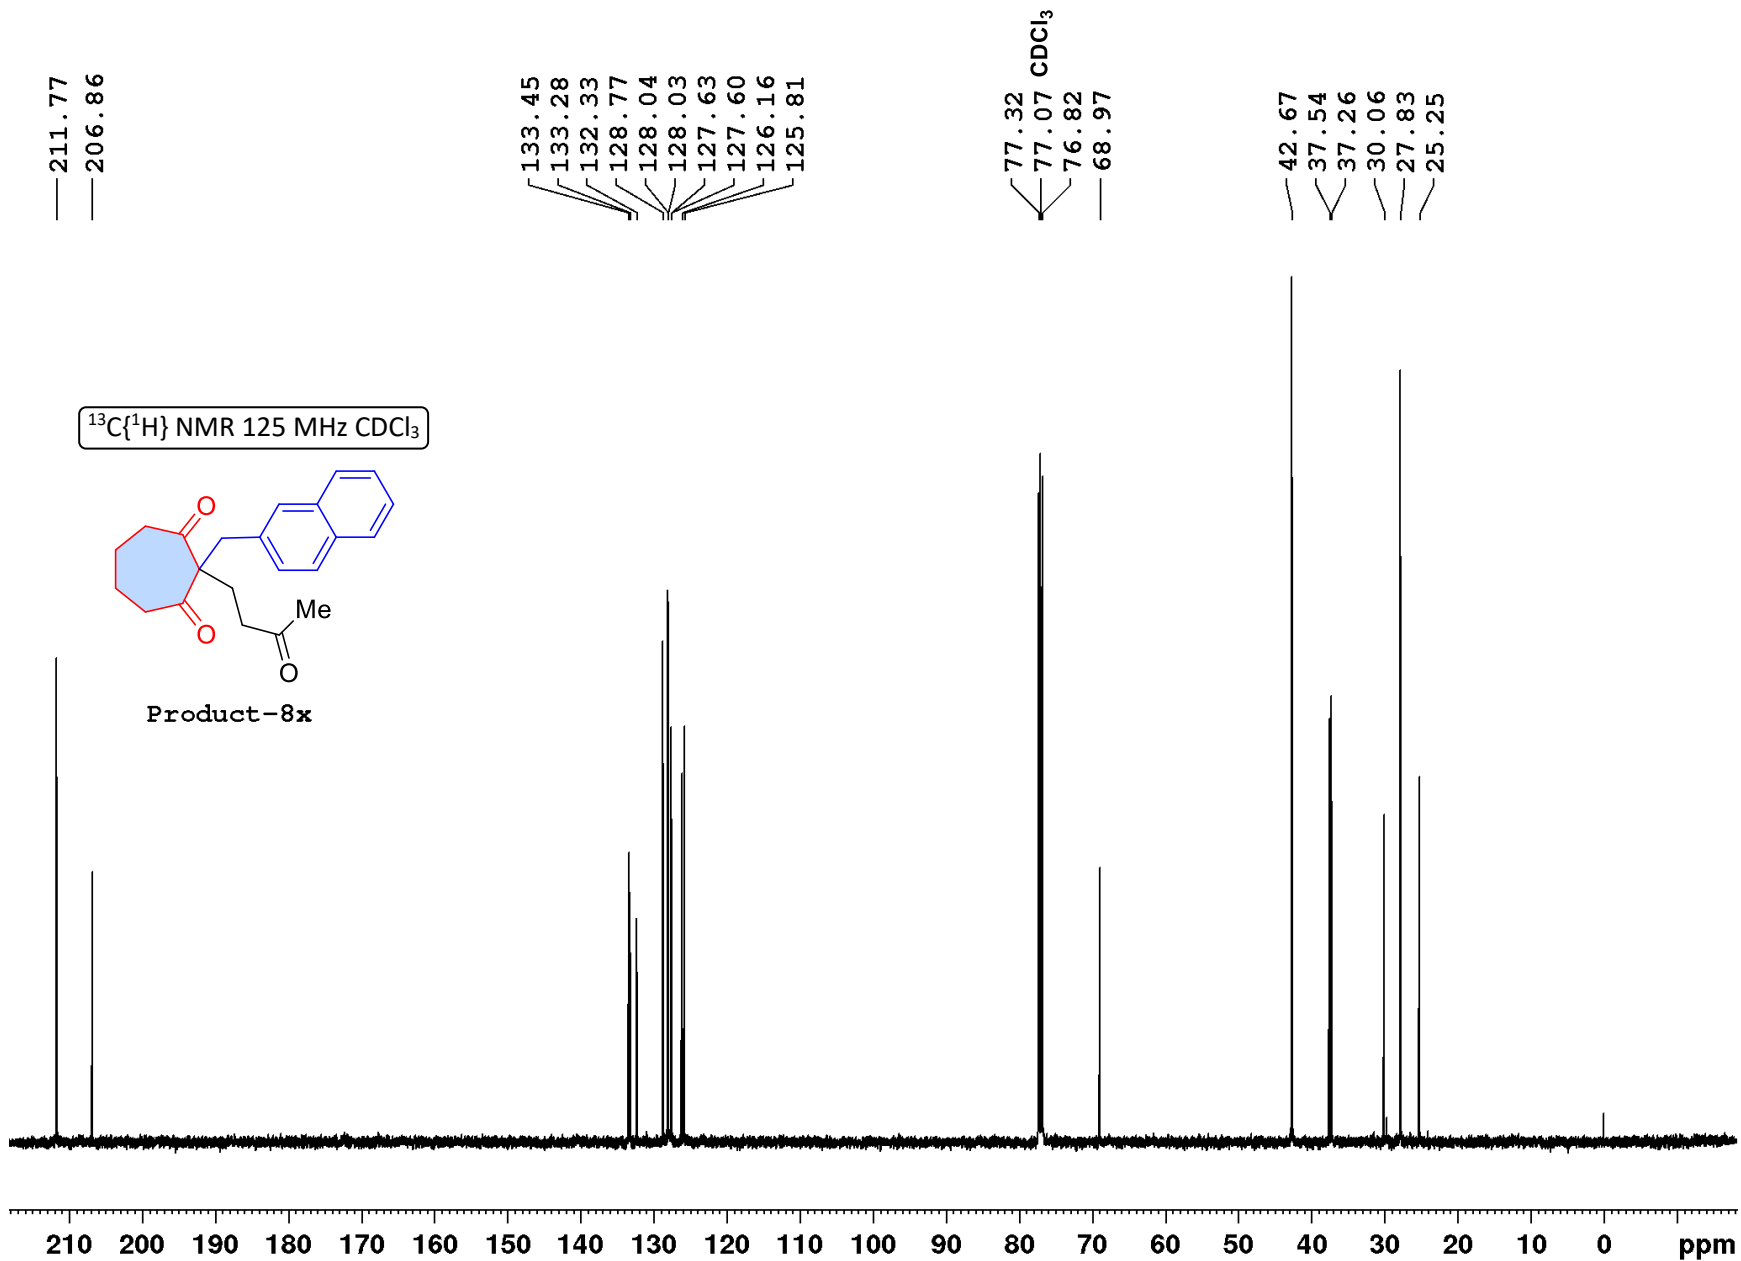

DEPT-135 125 MHz CDCl<sub>3</sub>

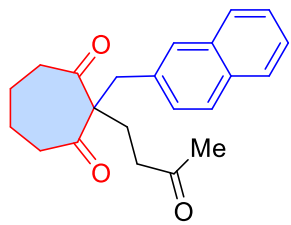

Product-8x

128.77  
128.04  
128.02  
127.63  
127.60  
126.16  
125.81

42.86  
42.67  
37.54  
37.26  
30.07  
28.03  
27.84  
25.24

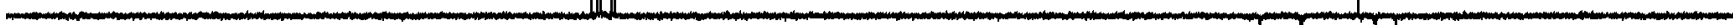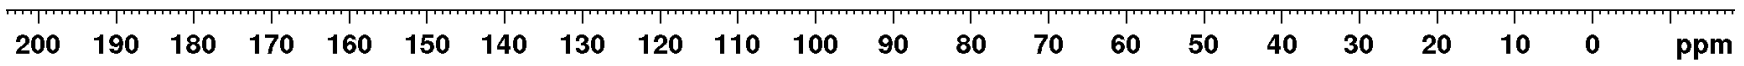



<sup>1</sup>H NMR 500 MHz CDCl<sub>3</sub>

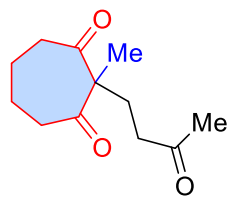

Product-800

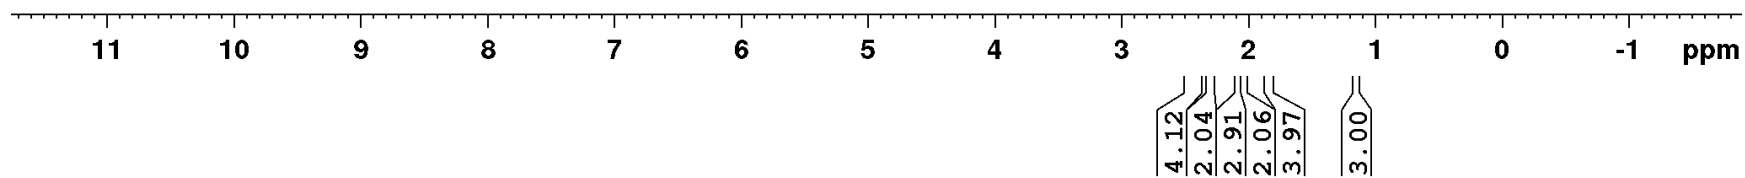

7.260 CDCl<sub>3</sub>

2.478  
2.467  
2.459  
2.455  
2.452  
2.445  
2.436  
2.433  
2.431  
2.423  
2.417  
2.415  
2.410  
2.408  
2.392  
2.388  
2.322  
2.307  
2.292  
2.088  
2.053  
2.046  
2.037  
2.022  
1.853  
1.848  
1.843  
1.153

— 212.28  
— 207.12

77.31  
77.00  
76.68  
CDCl<sub>3</sub>

— 63.49

— 41.32  
— 37.64  
— 29.93  
— 27.92  
— 26.74  
— 17.67

<sup>13</sup>C{<sup>1</sup>H} NMR 100 MHz CDCl<sub>3</sub>

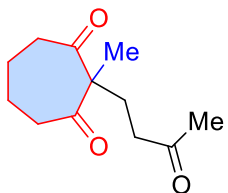

Product-800

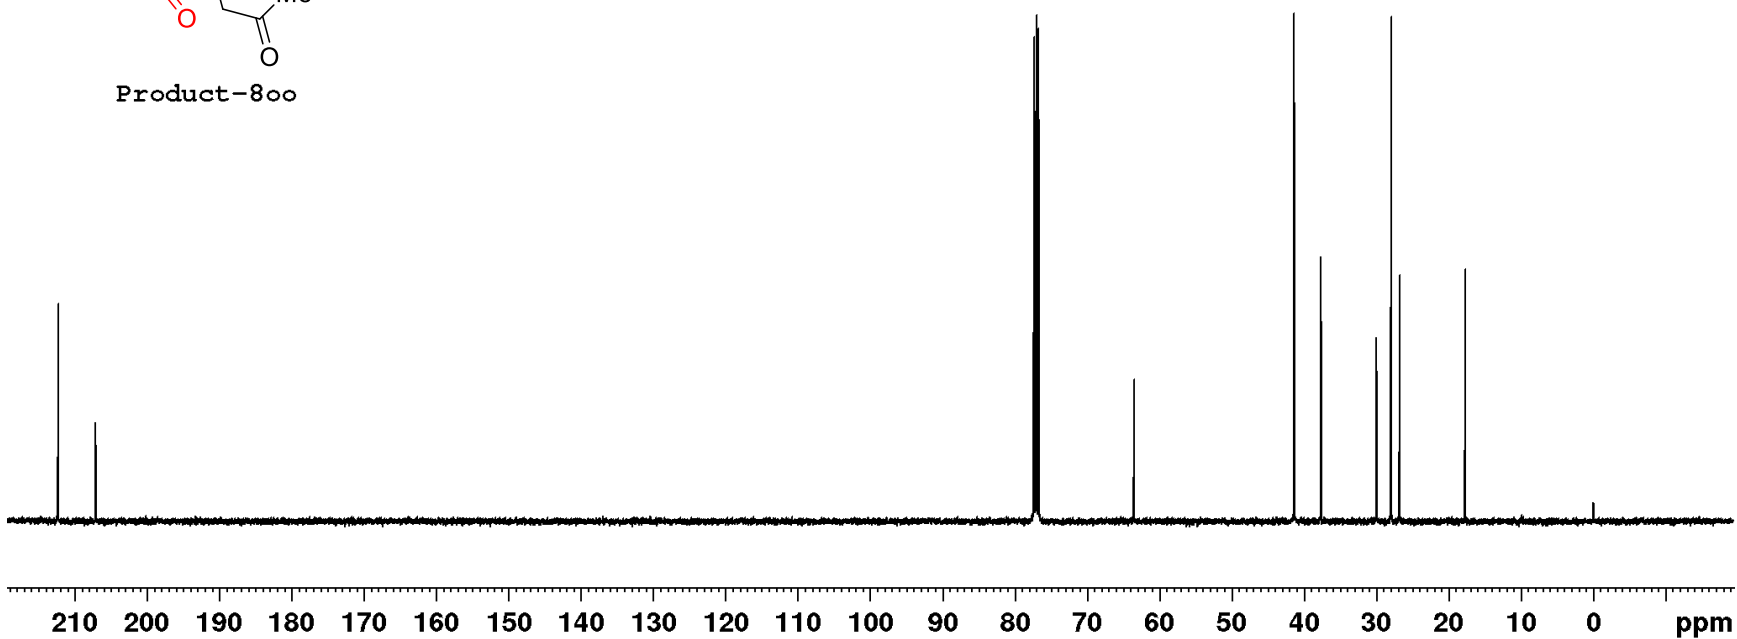

DEPT-135 100 MHz CDCl<sub>3</sub>

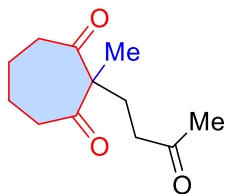

Product-800

41.37  
37.68  
30.01  
27.99  
26.76  
17.71

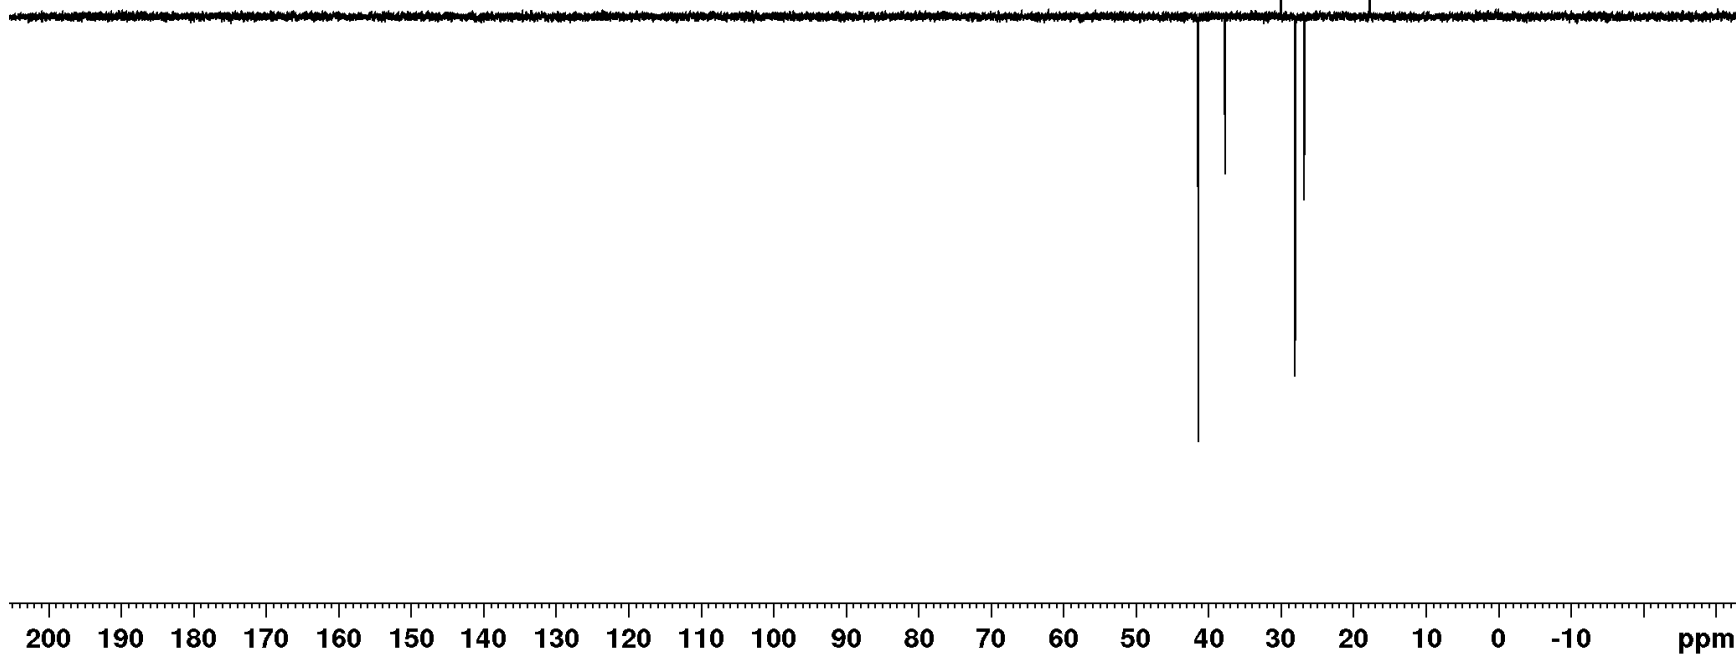

<sup>1</sup>H NMR 400 MHz CDCl<sub>3</sub>

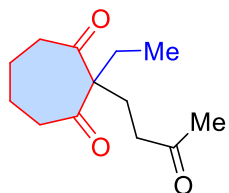

Product-8y

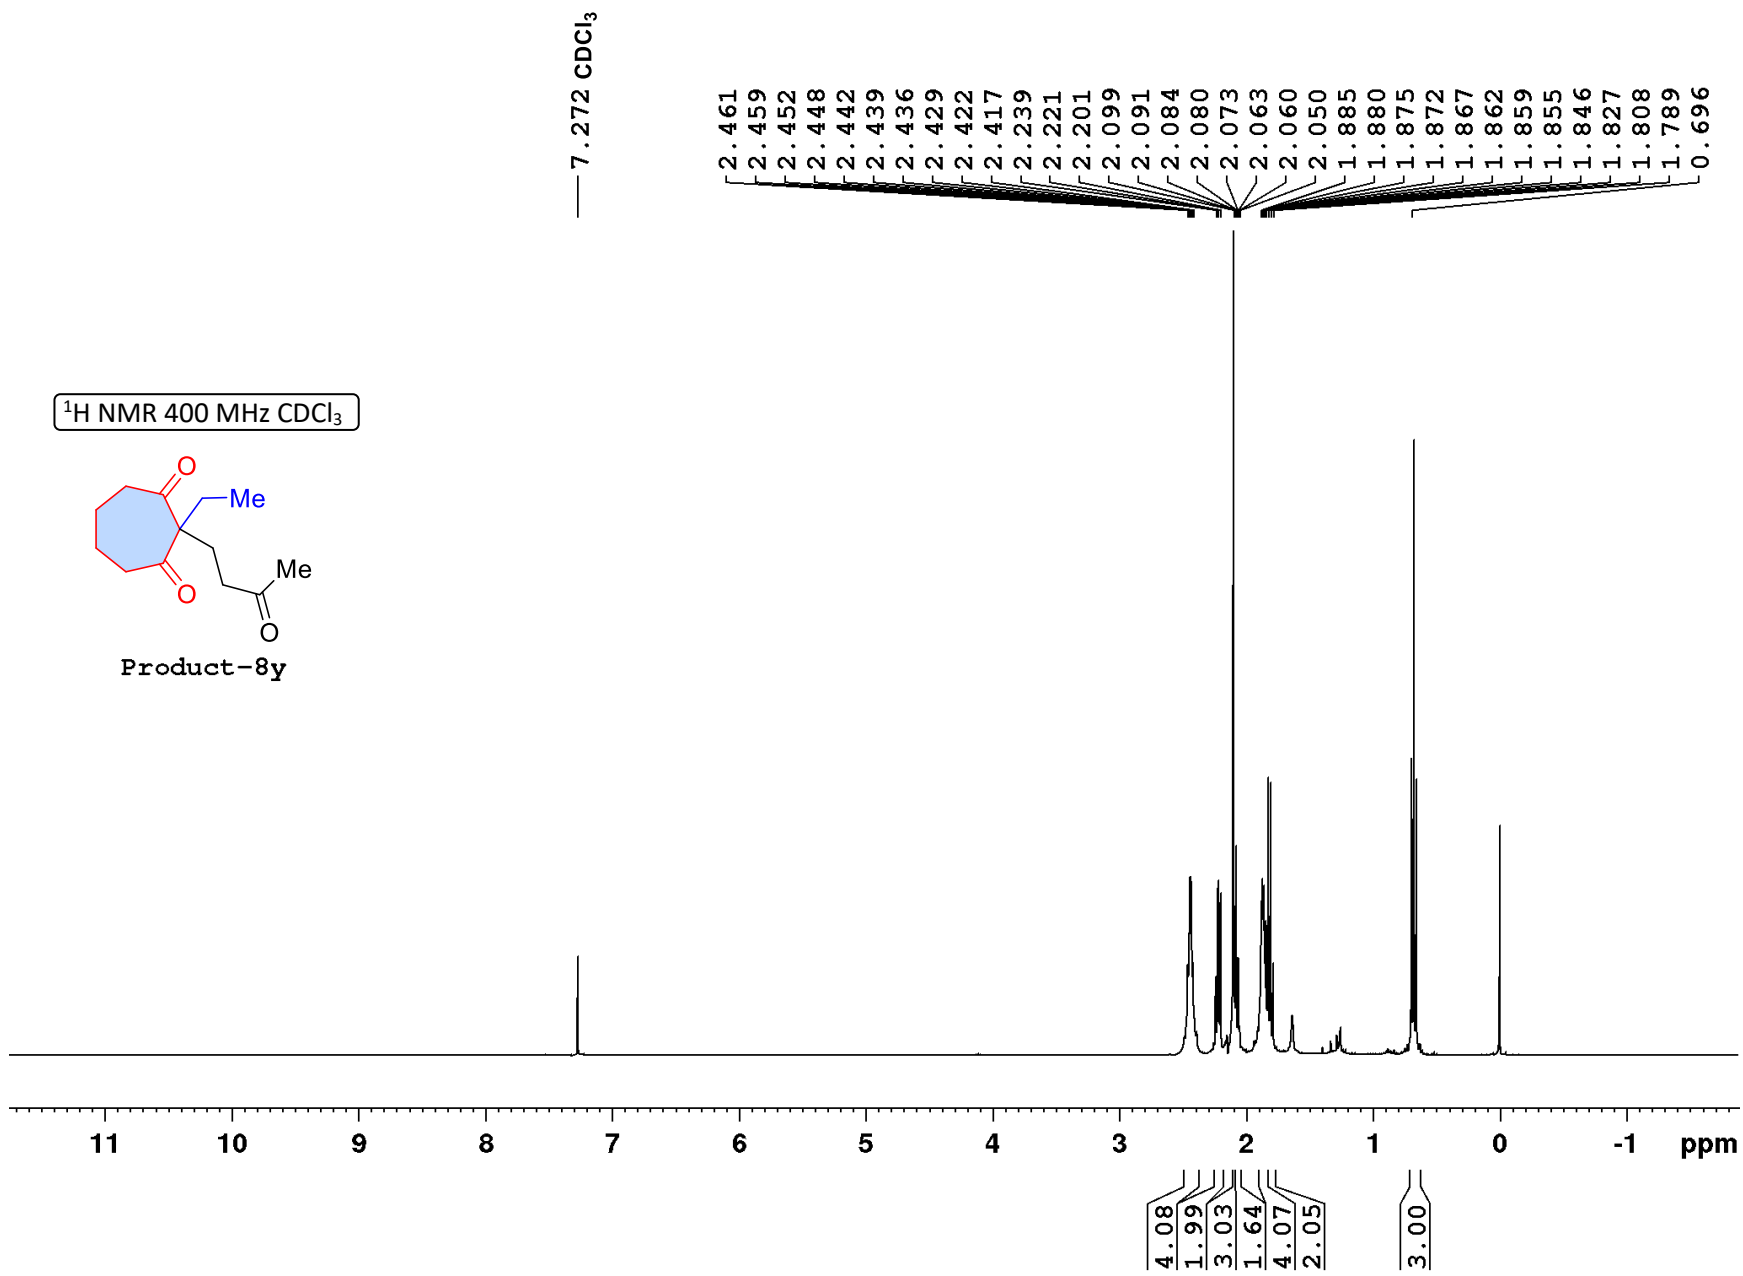

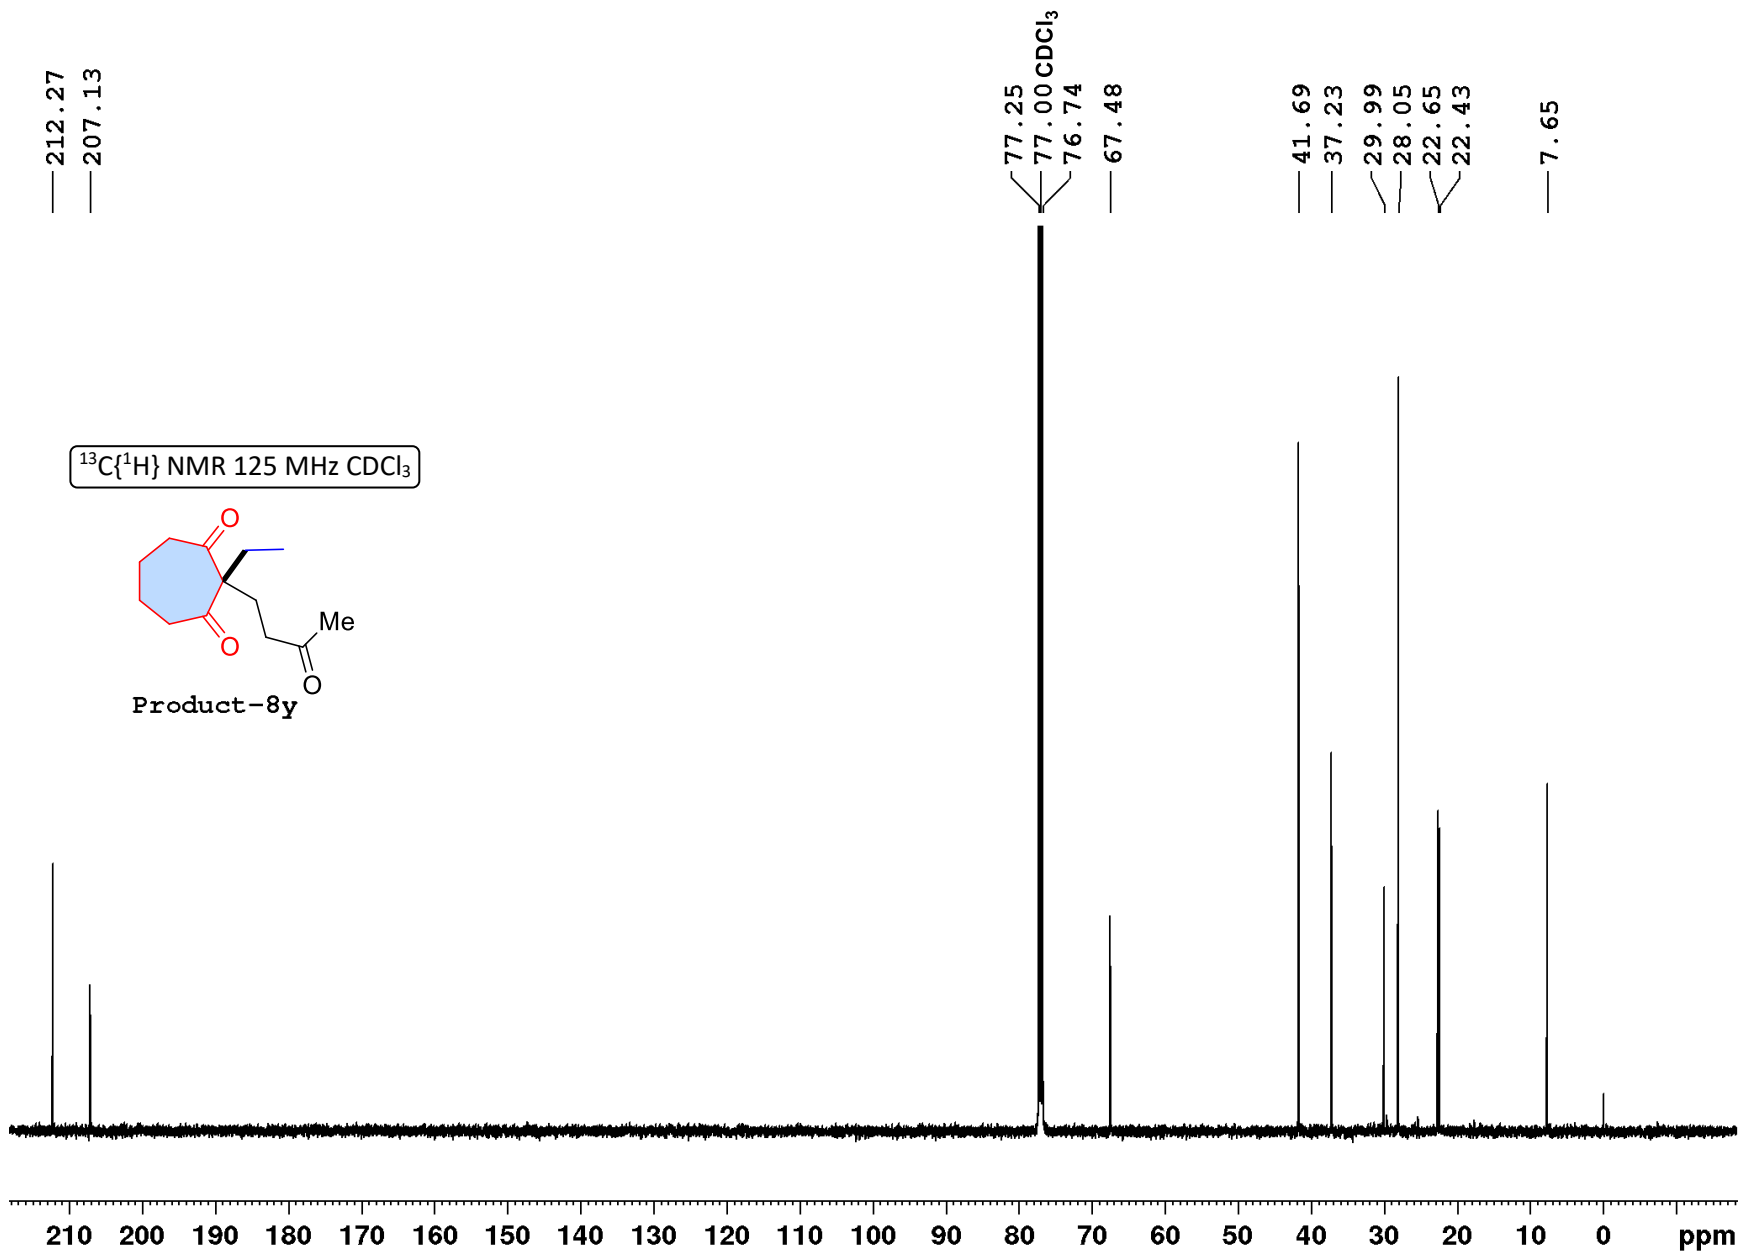

DEPT-135 100 MHz CDCl<sub>3</sub>

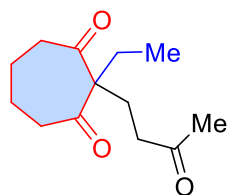

Product-9y

41.72  
37.26  
30.03  
28.08  
22.67  
22.45  
7.68

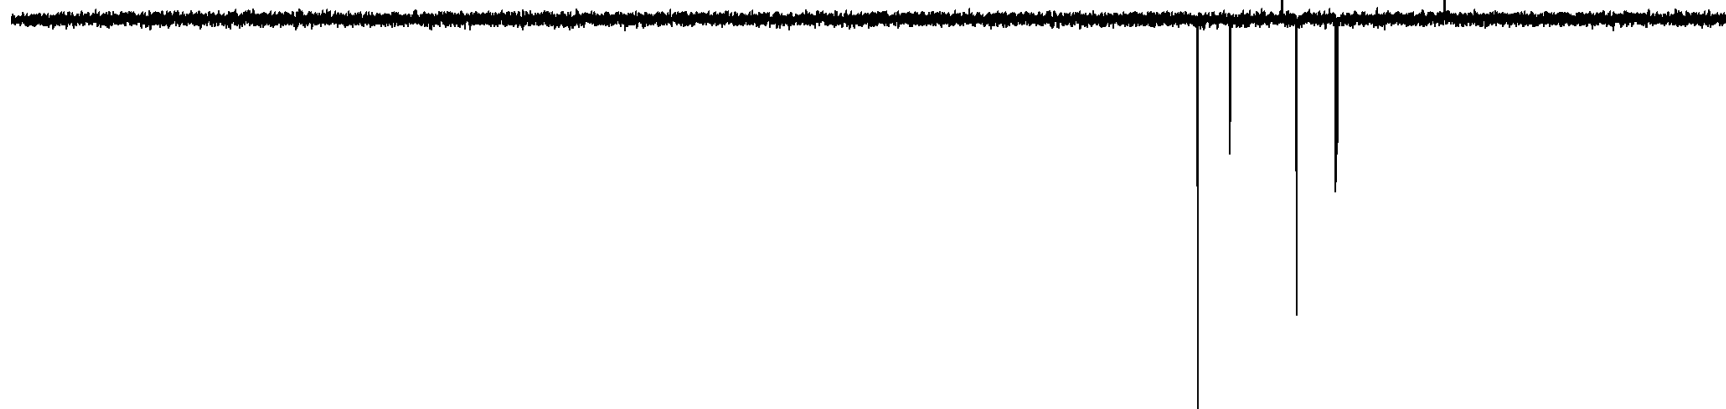

200 190 180 170 160 150 140 130 120 110 100 90 80 70 60 50 40 30 20 10 0 -10 ppm

<sup>1</sup>H NMR 500 MHz CDCl<sub>3</sub>

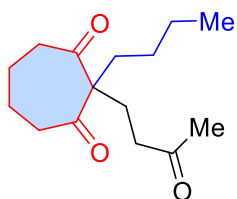

Product-8aa

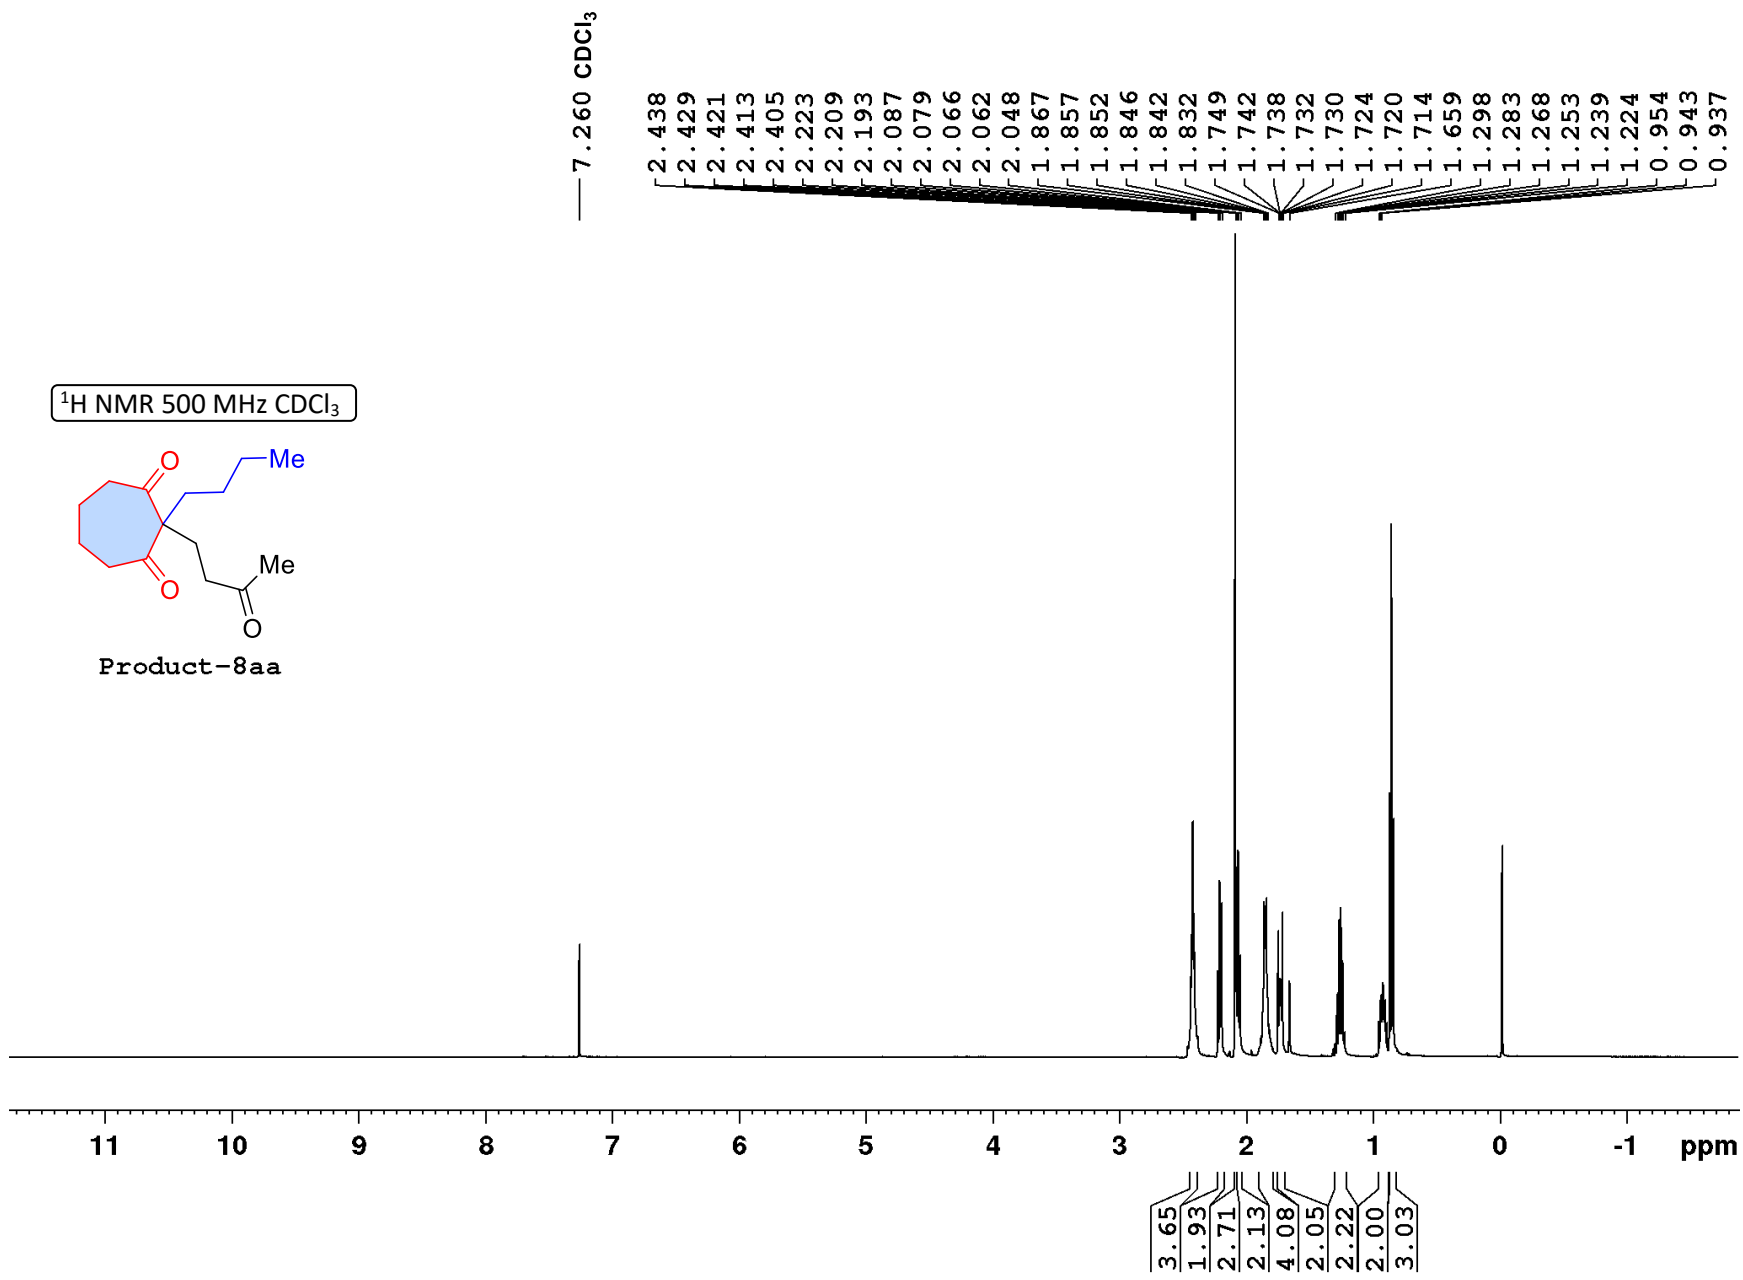

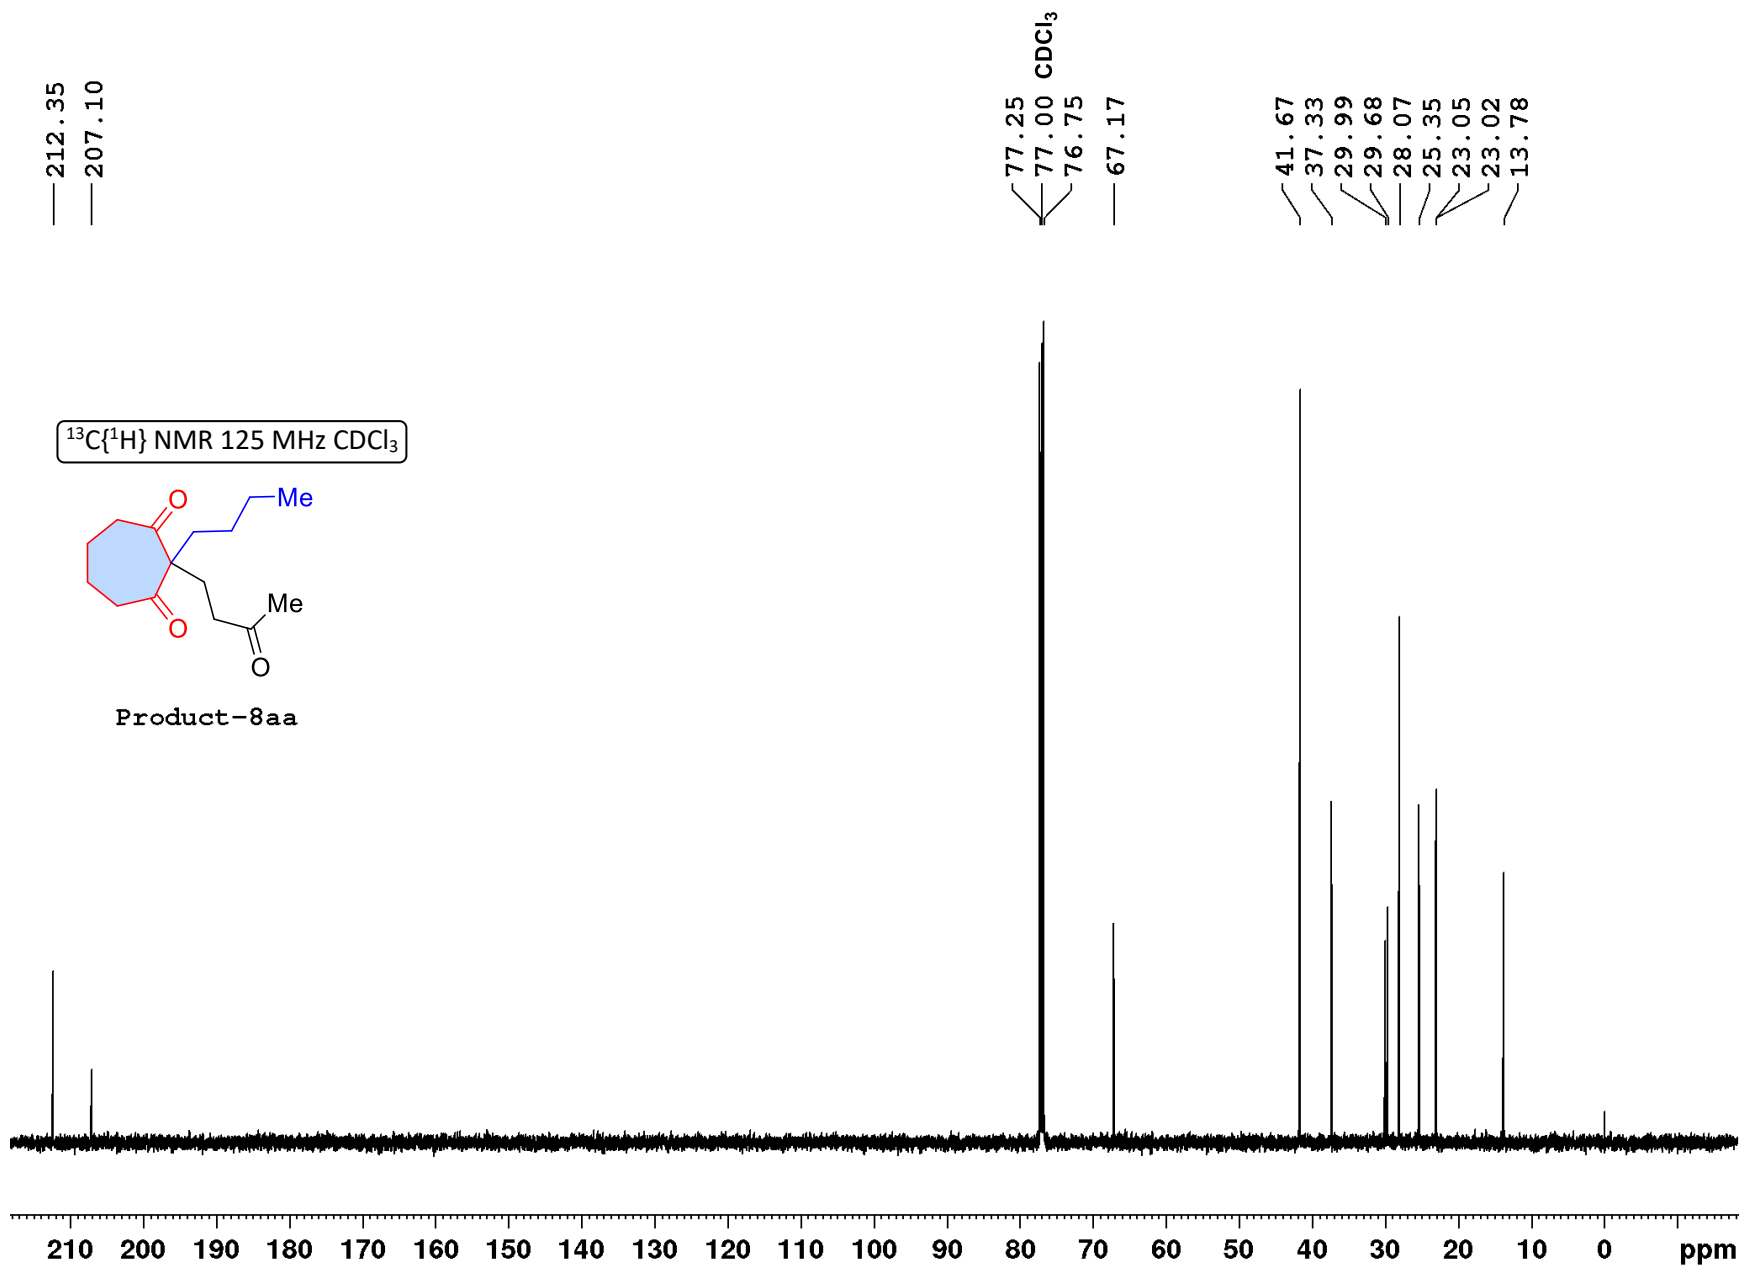



DEPT-135 125 MHz CDCl<sub>3</sub>

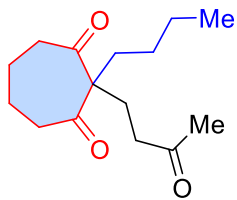

Product-8aa

41.70  
37.36  
30.05  
29.68  
28.12  
25.38  
23.05  
13.83

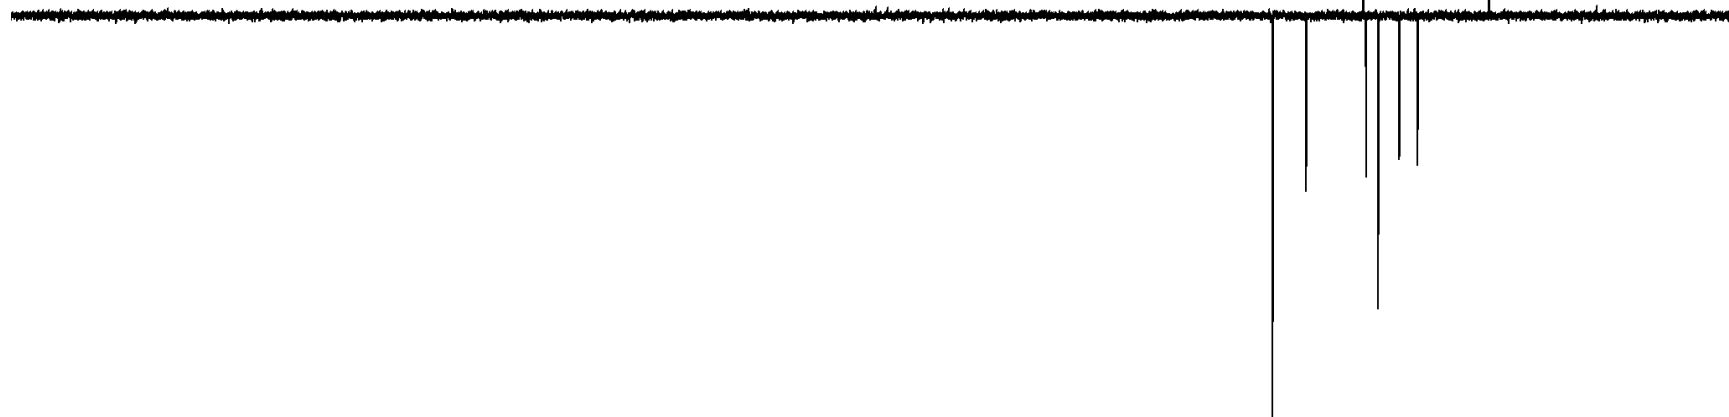

200 190 180 170 160 150 140 130 120 110 100 90 80 70 60 50 40 30 20 10 0 ppm

<sup>1</sup>H NMR 400 MHz CDCl<sub>3</sub>

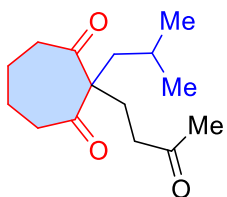

Product-8dd

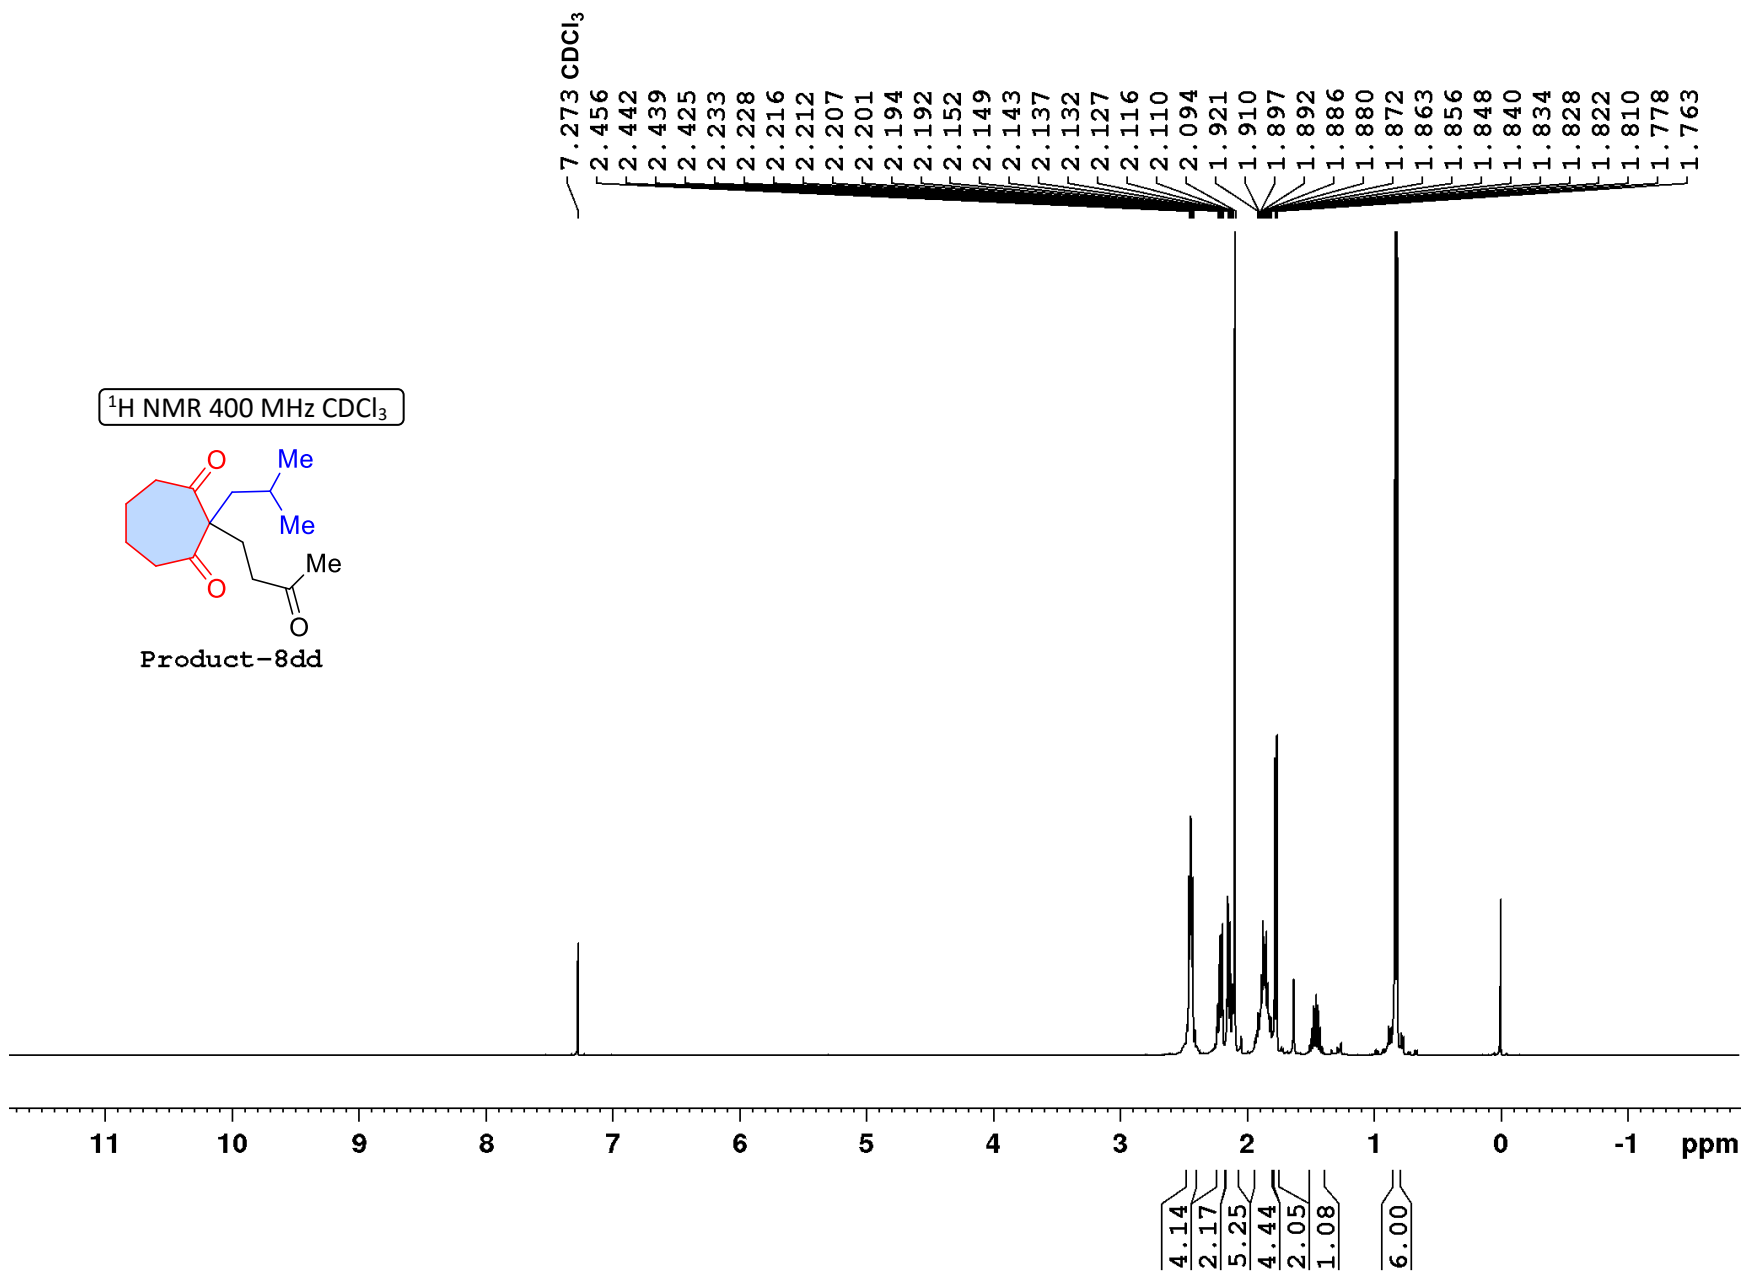

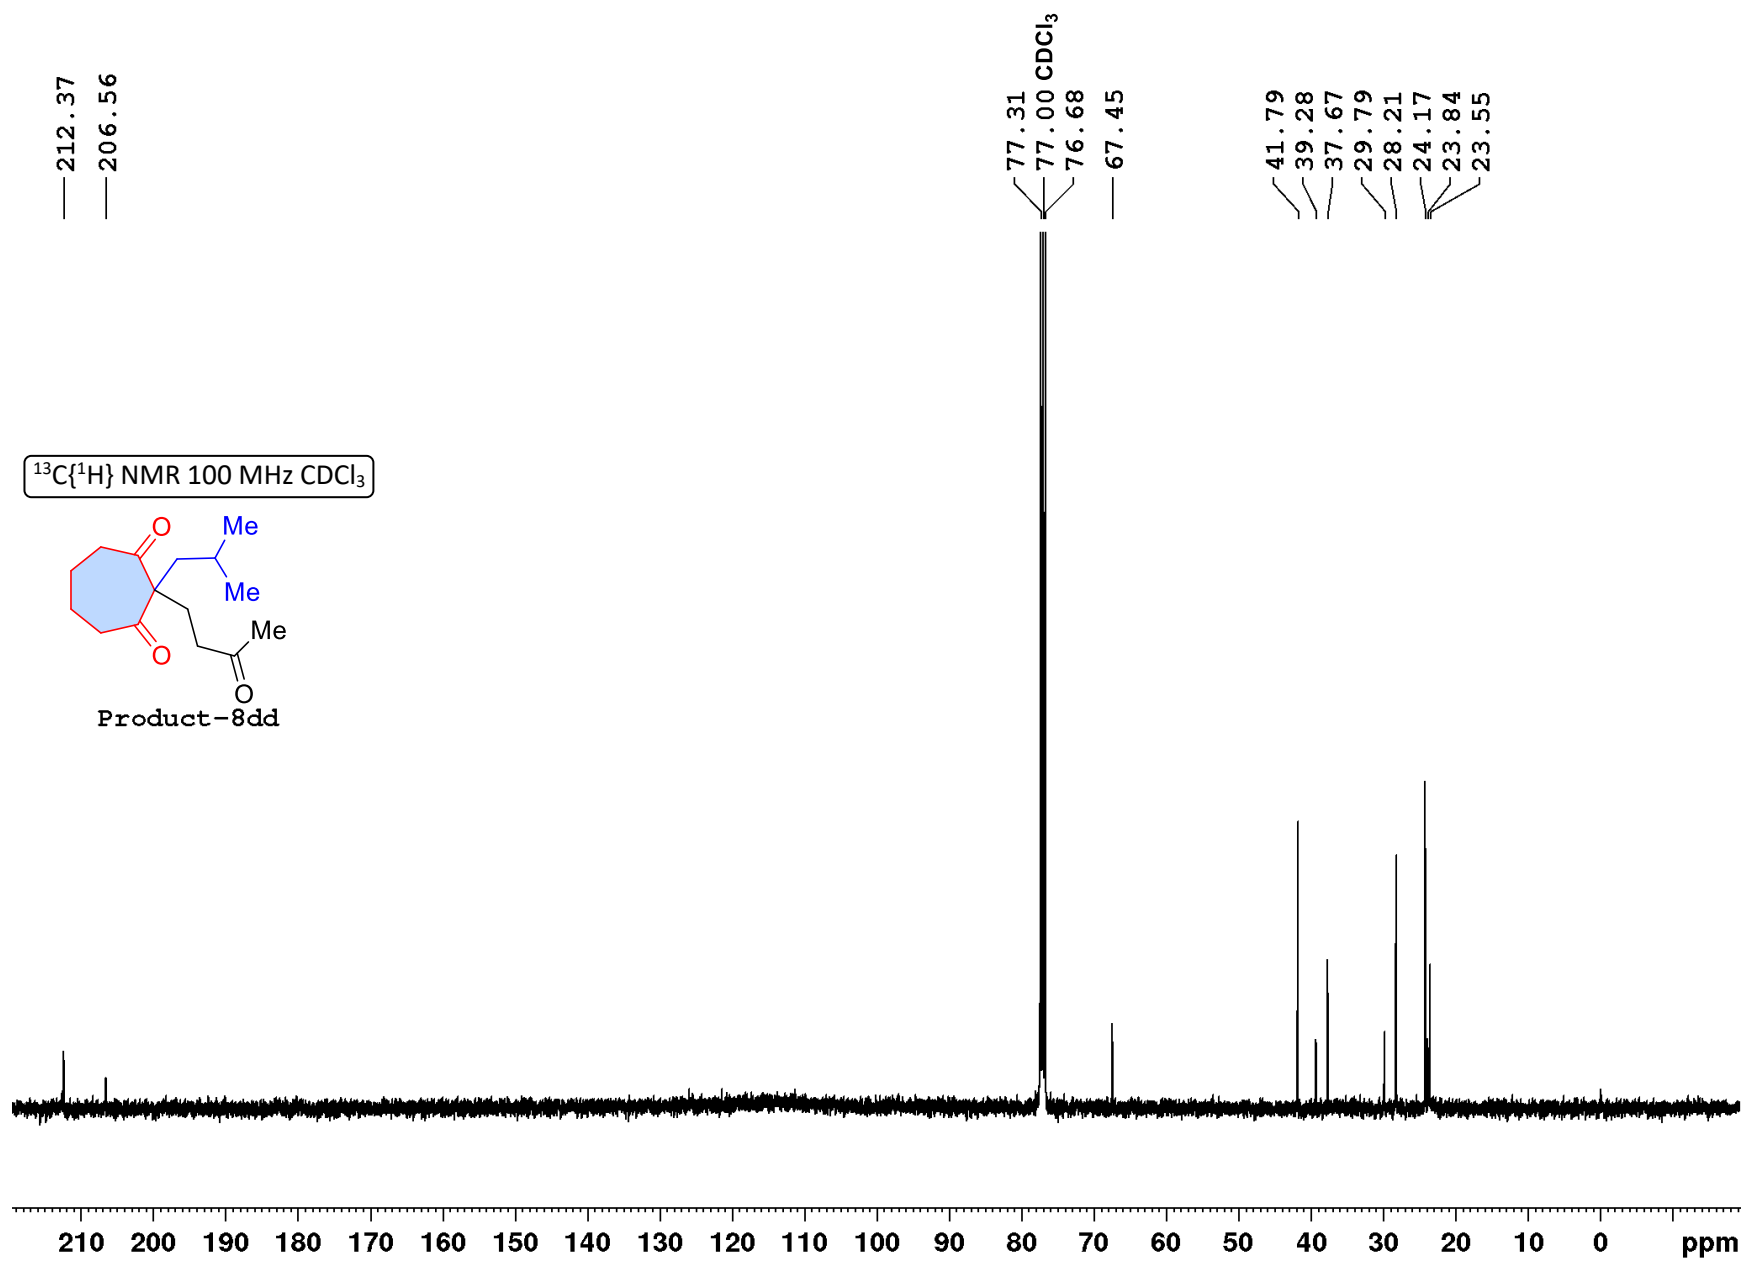

DEPT-135 100 MHz CDCl<sub>3</sub>

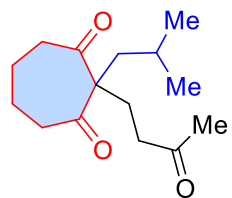

Product-8dd

41.64  
38.77  
37.53  
30.03  
28.38  
24.14  
23.42  
23.23

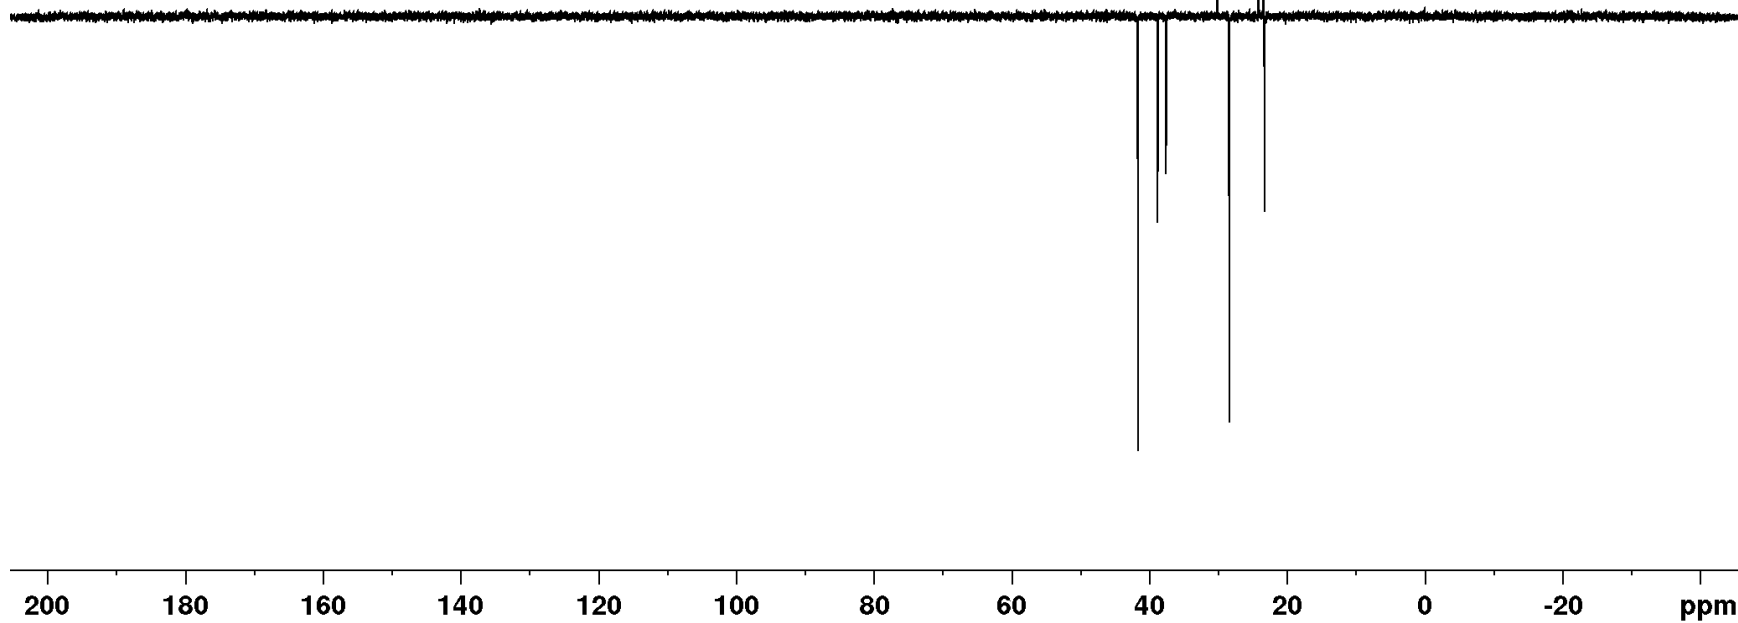

<sup>1</sup>H NMR 500 MHz CDCl<sub>3</sub>

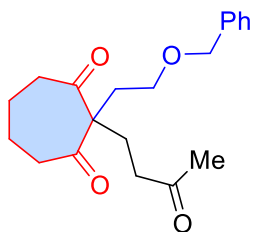

Product-8gg

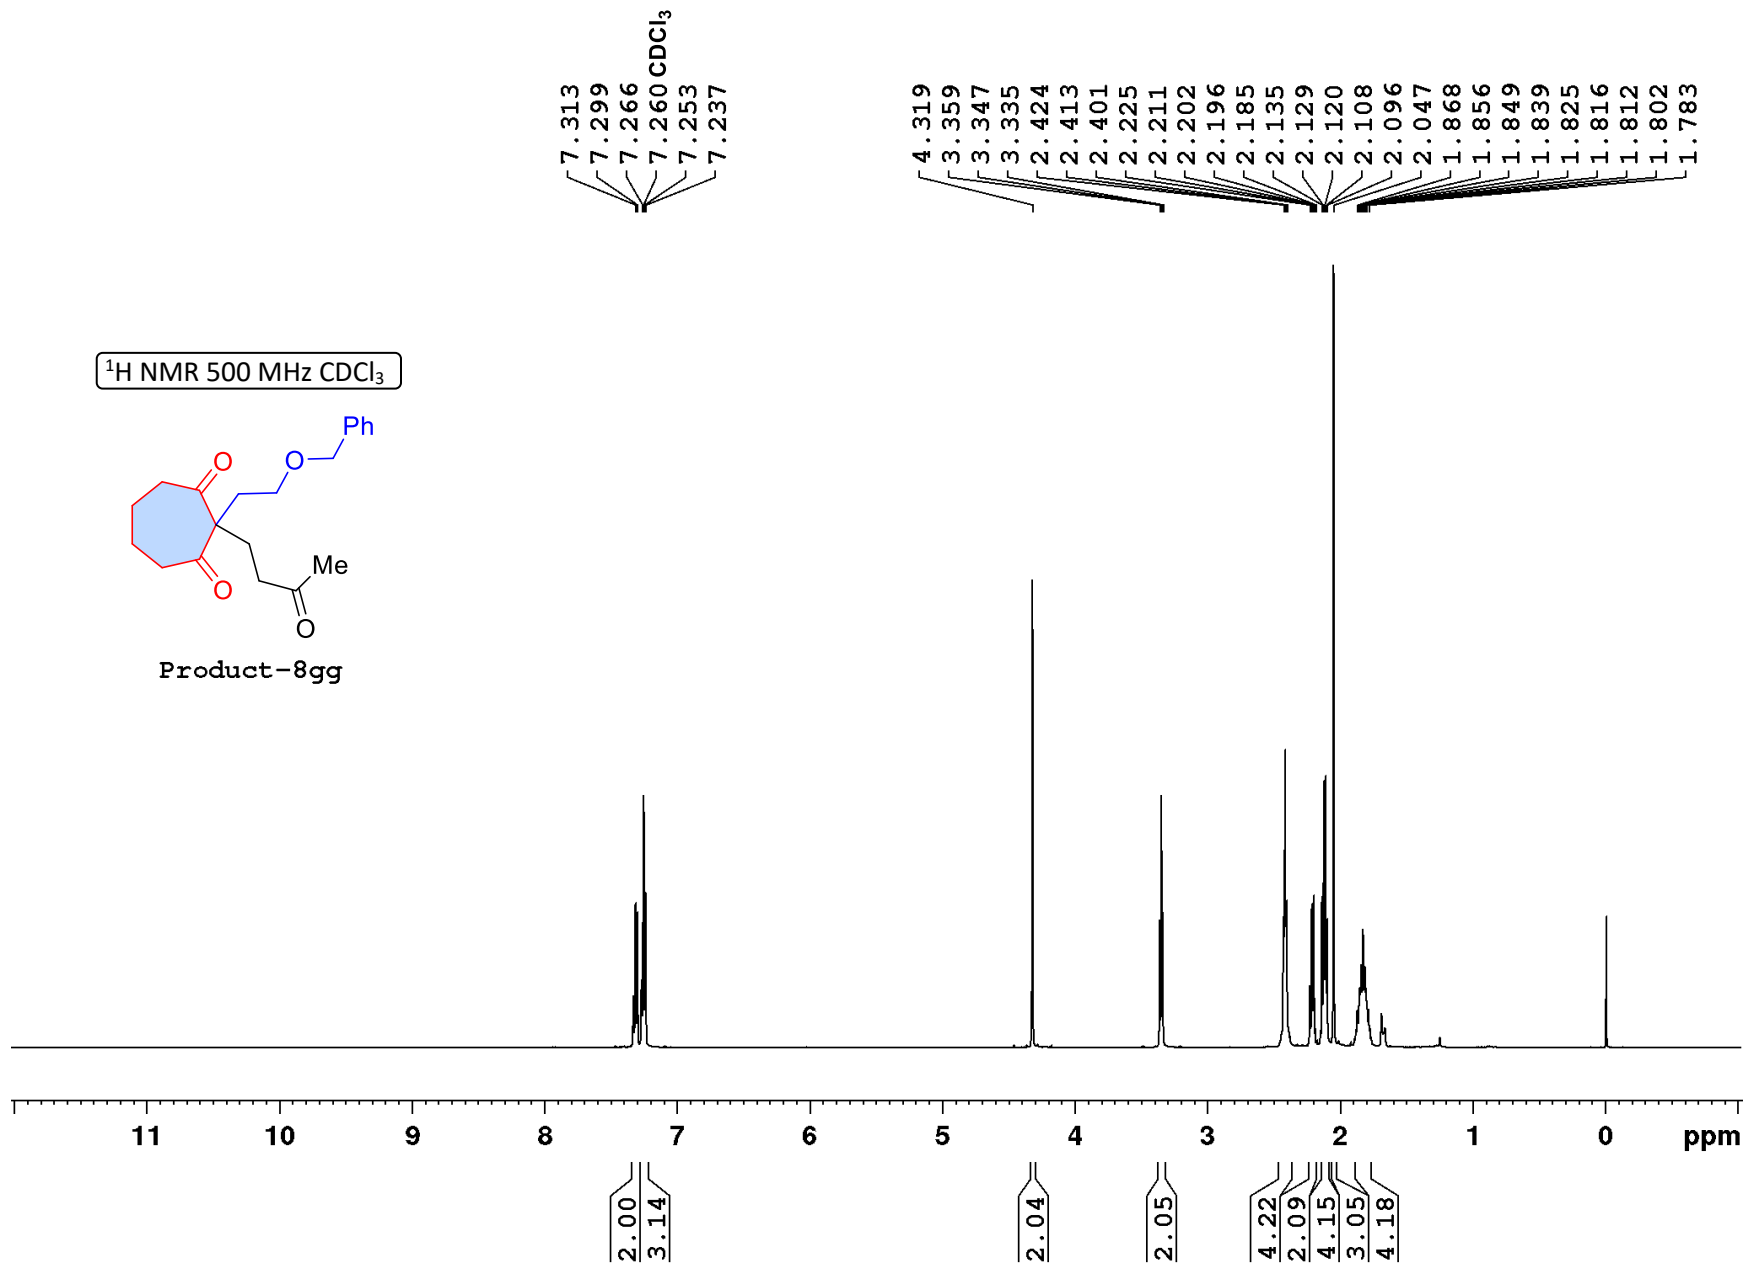

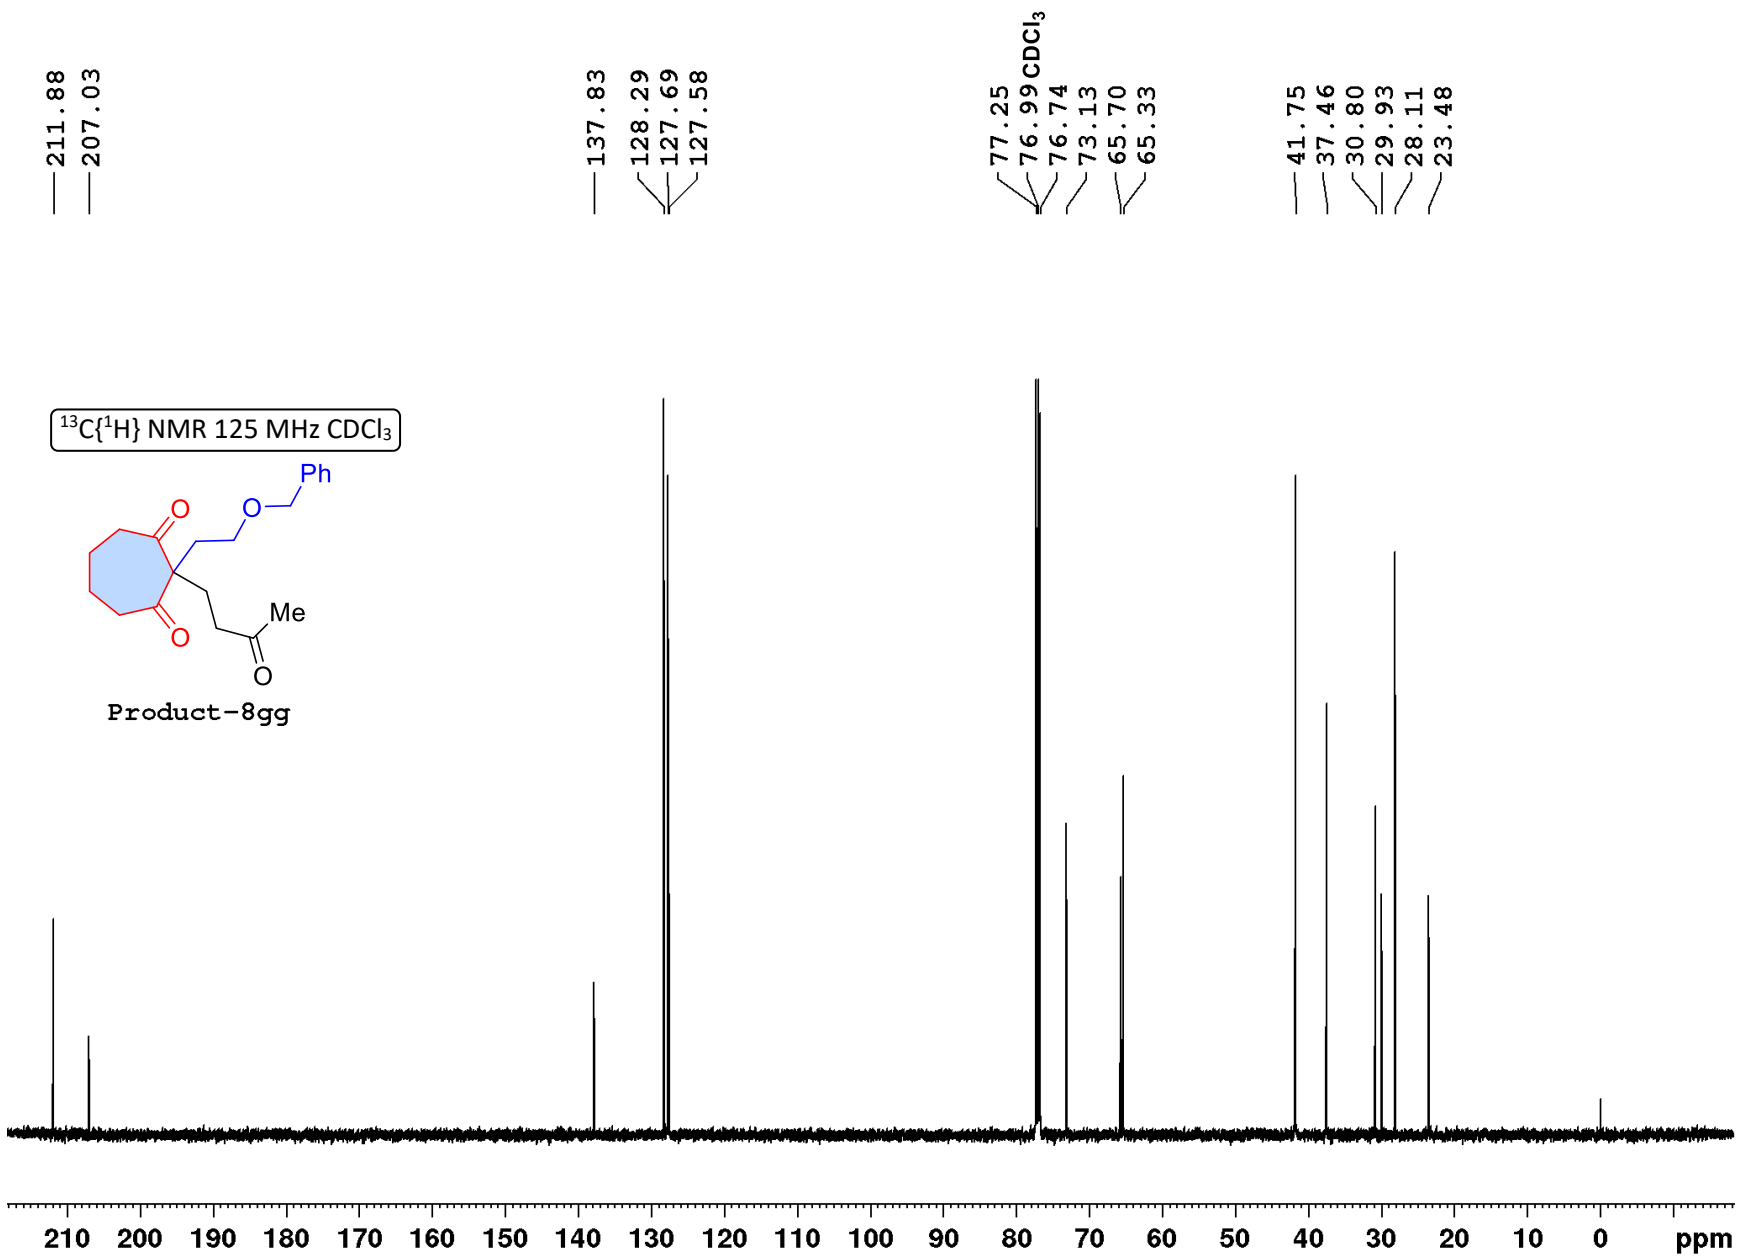

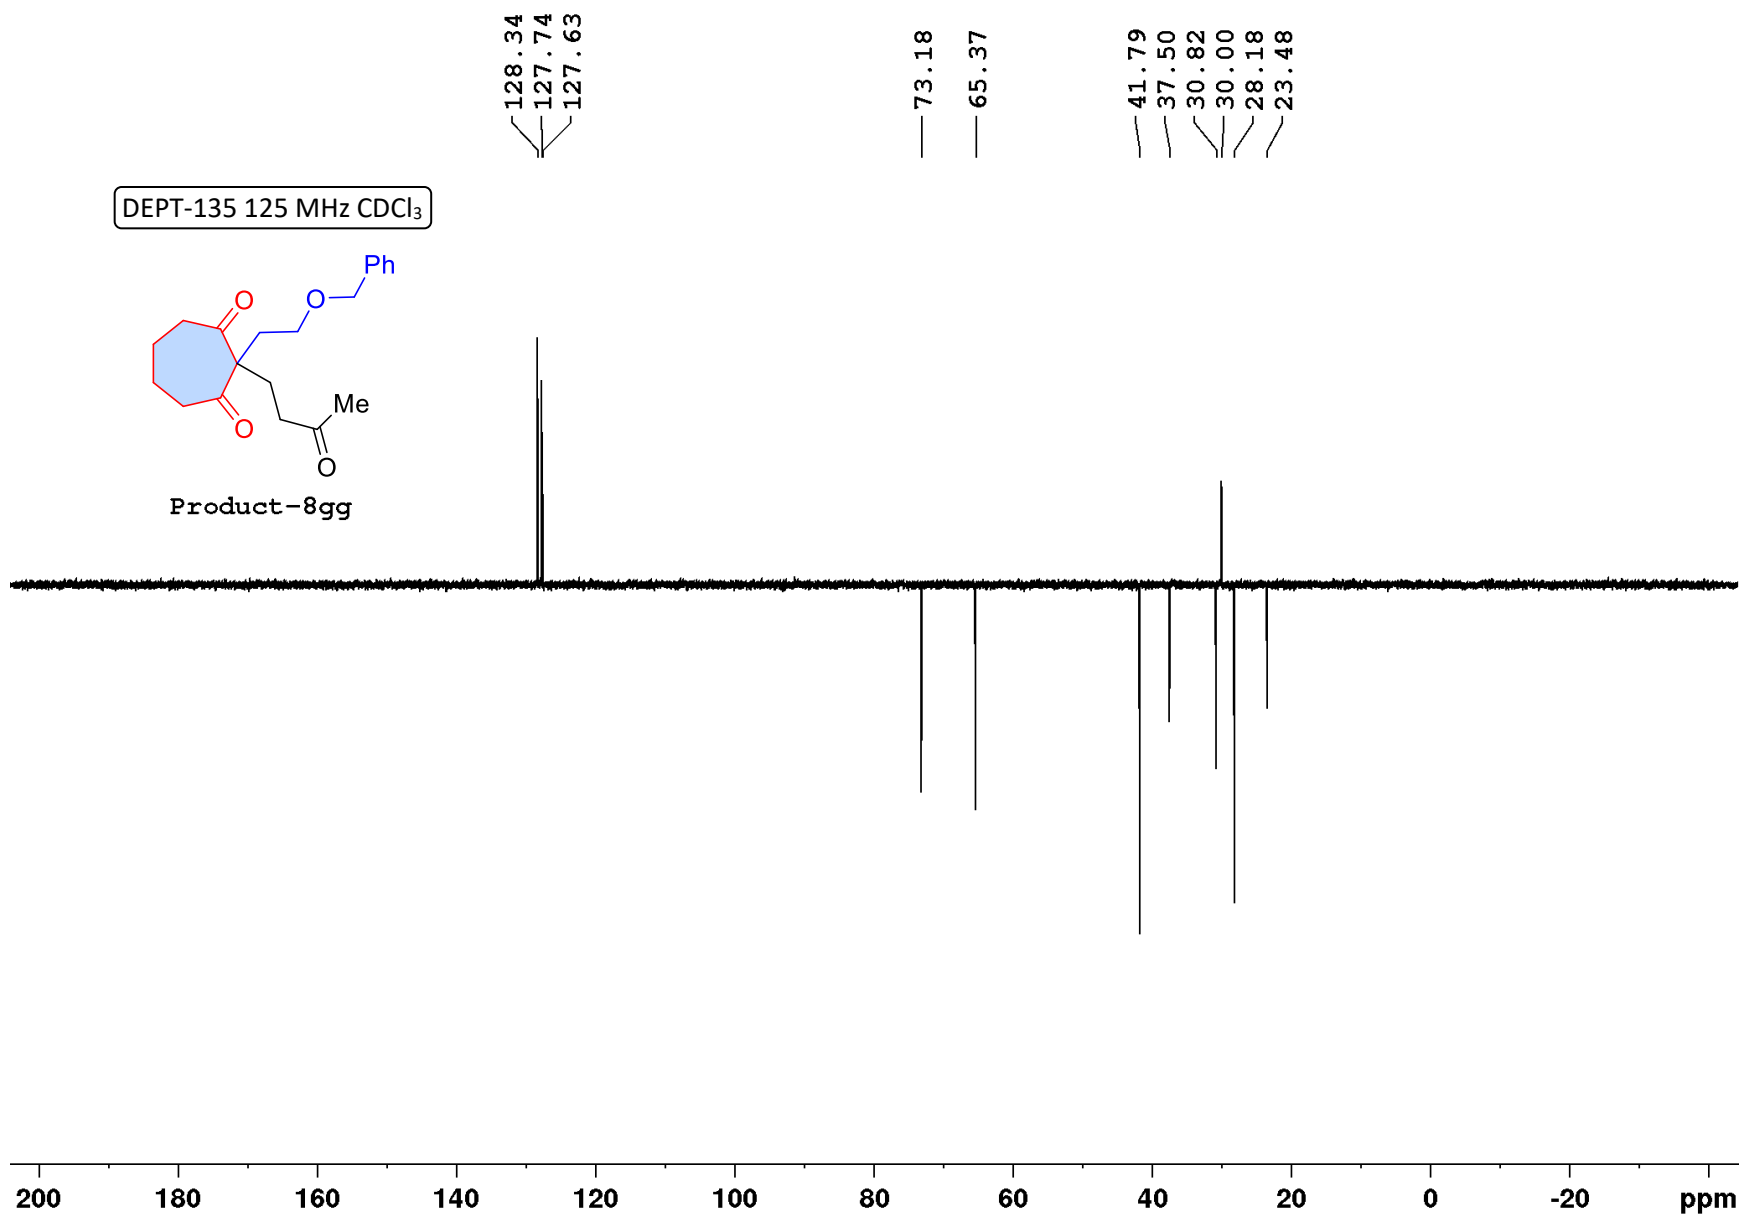

<sup>1</sup>H NMR 500 MHz CDCl<sub>3</sub>

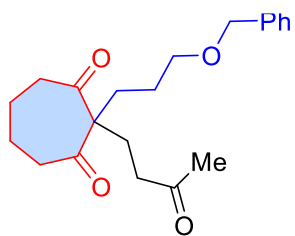

Product-8hh

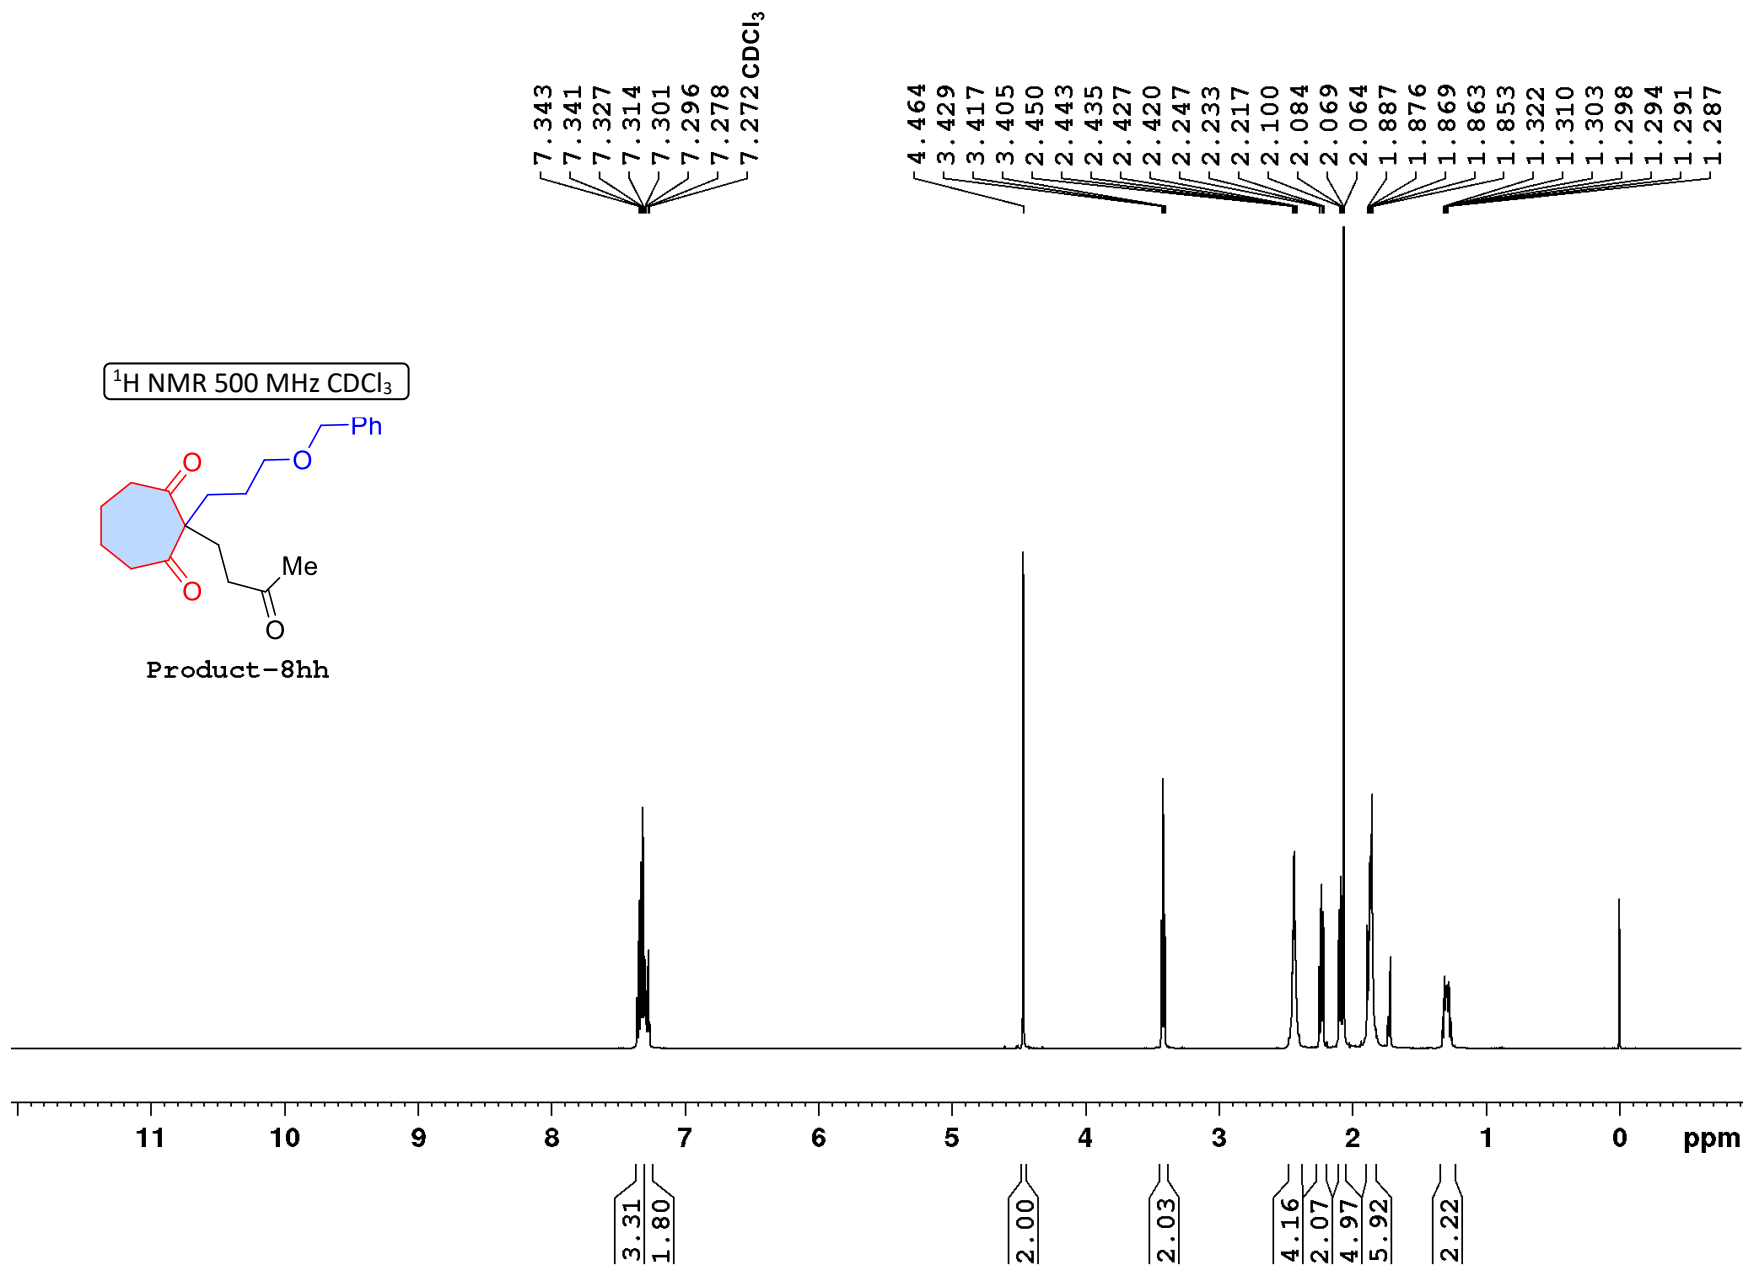



— 212.12  
— 207.08

— 138.32  
— 128.31  
— 127.50

77.25  
76.99 CDCl<sub>3</sub>  
76.74  
72.87  
69.79  
66.81

— 41.60  
— 37.18  
— 29.95  
— 28.03  
— 26.48  
— 23.62  
— 22.87

<sup>13</sup>C{<sup>1</sup>H} NMR 125 MHz CDCl<sub>3</sub>

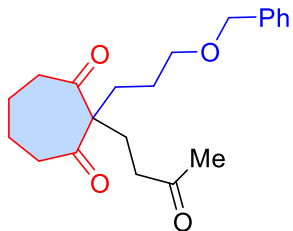

Product-8hh

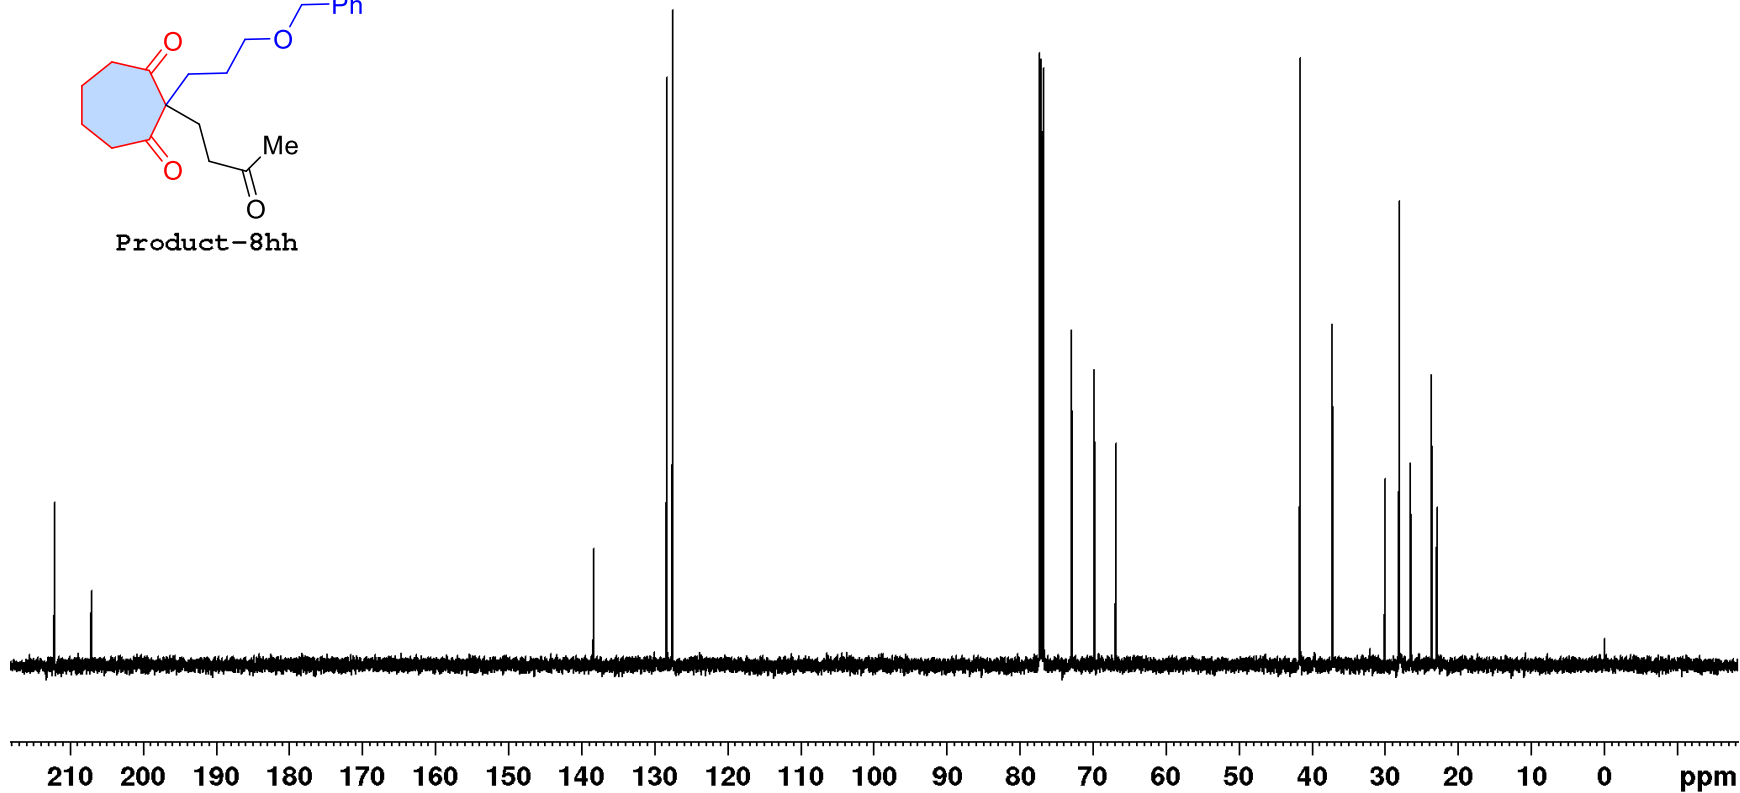

DEPT-135 125 MHz CDCl<sub>3</sub>

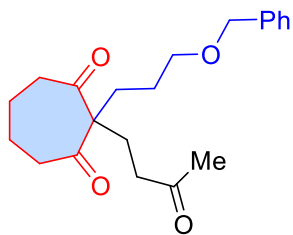

Product-8hh

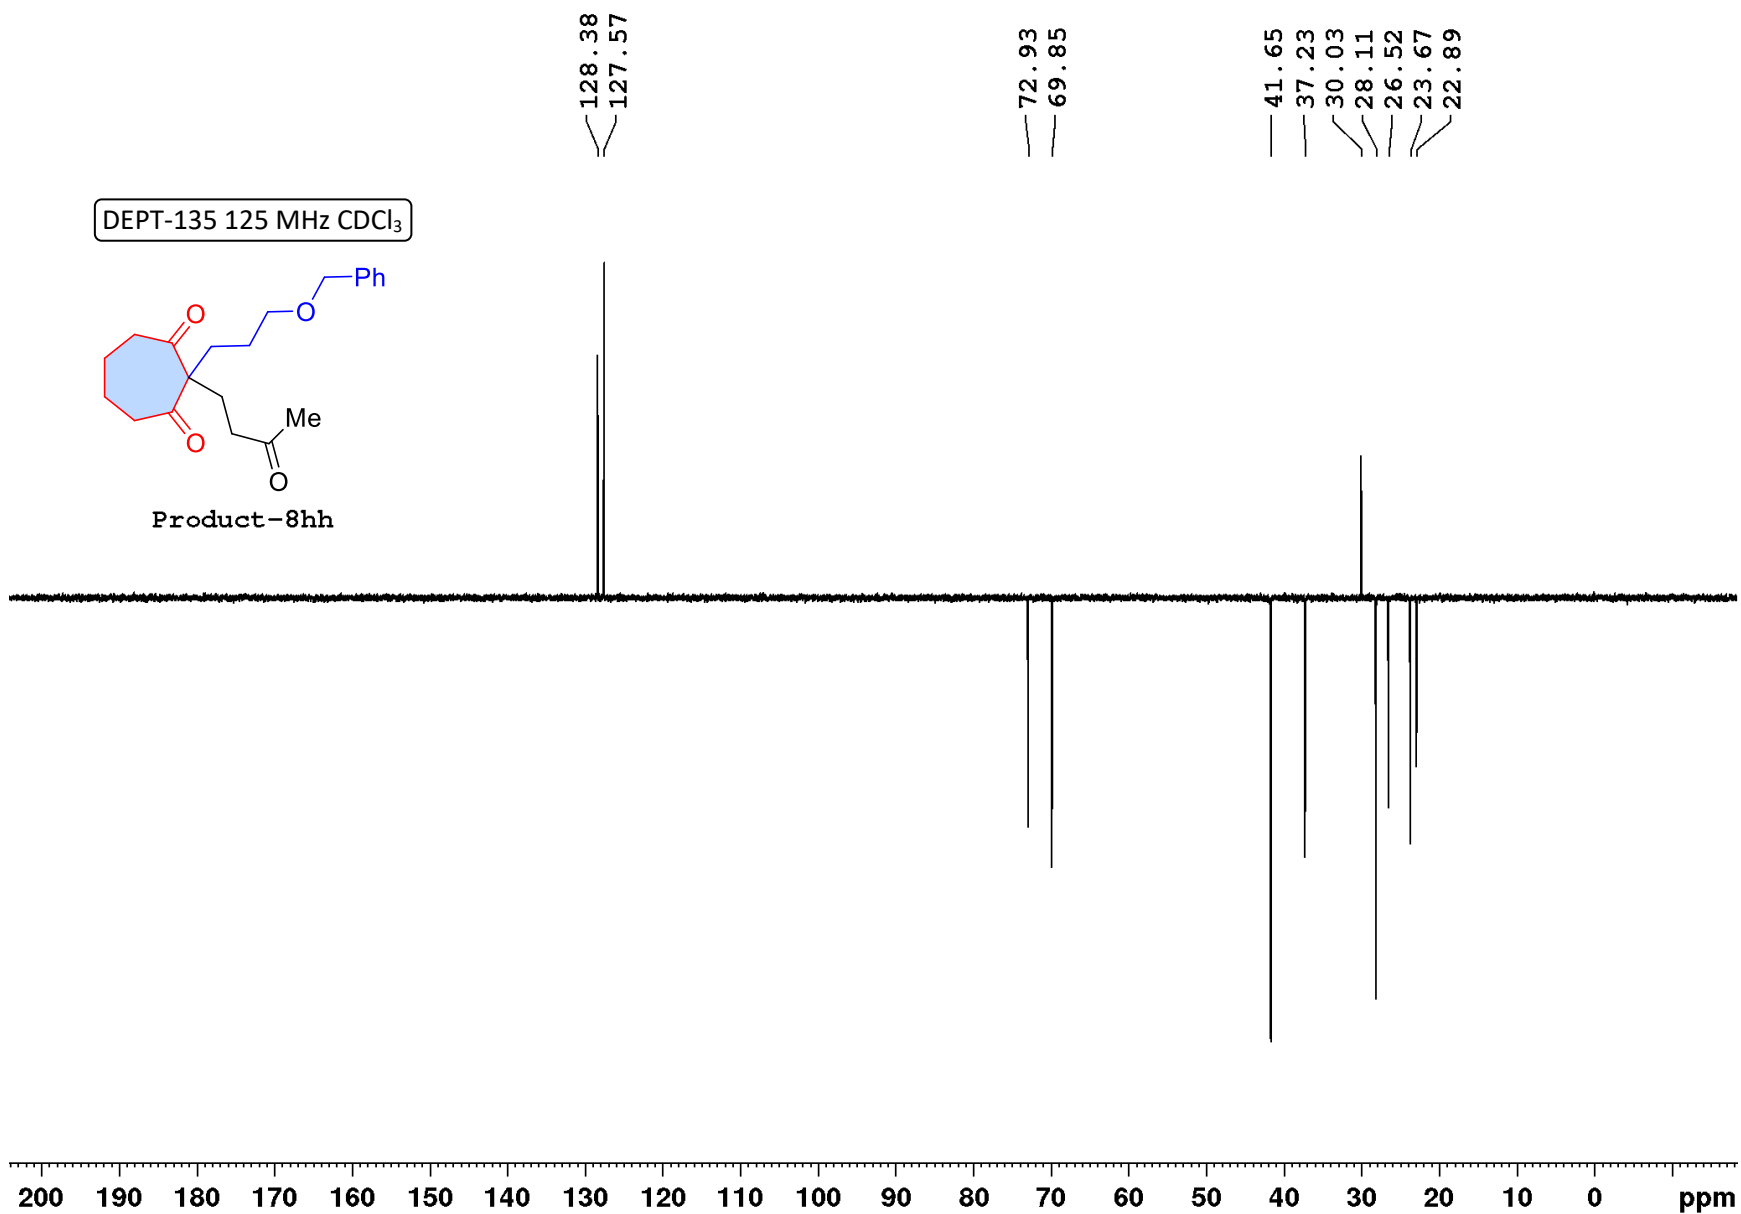

7.260 CDCl<sub>3</sub>  
 7.213  
 7.210  
 7.203  
 7.199  
 7.196  
 7.189  
 7.187  
 7.150  
 7.145  
 7.141  
 7.134  
 7.131  
 6.135  
 3.303  
 3.276  
 3.188  
 3.161  
 2.673  
 2.671  
 2.399  
 2.386  
 2.376  
 2.326  
 2.221  
 2.218  
 2.201  
 2.175  
 2.164  
 2.149  
 2.138  
 2.063  
 2.051  
 2.029  
 2.025  
 2.018  
 1.952  
 1.948  
 1.941  
 1.937  
 1.933  
 1.929  
 1.926  
 1.923  
 1.915  
 1.910  
 1.488  
 1.485  
 1.477  
 1.473  
 1.459  
 1.456  
 1.452  
 1.434  
 1.431  
 1.428  
 1.410  
 1.406

<sup>1</sup>H NMR 500 MHz CDCl<sub>3</sub>

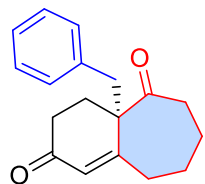

Product (-)-9a

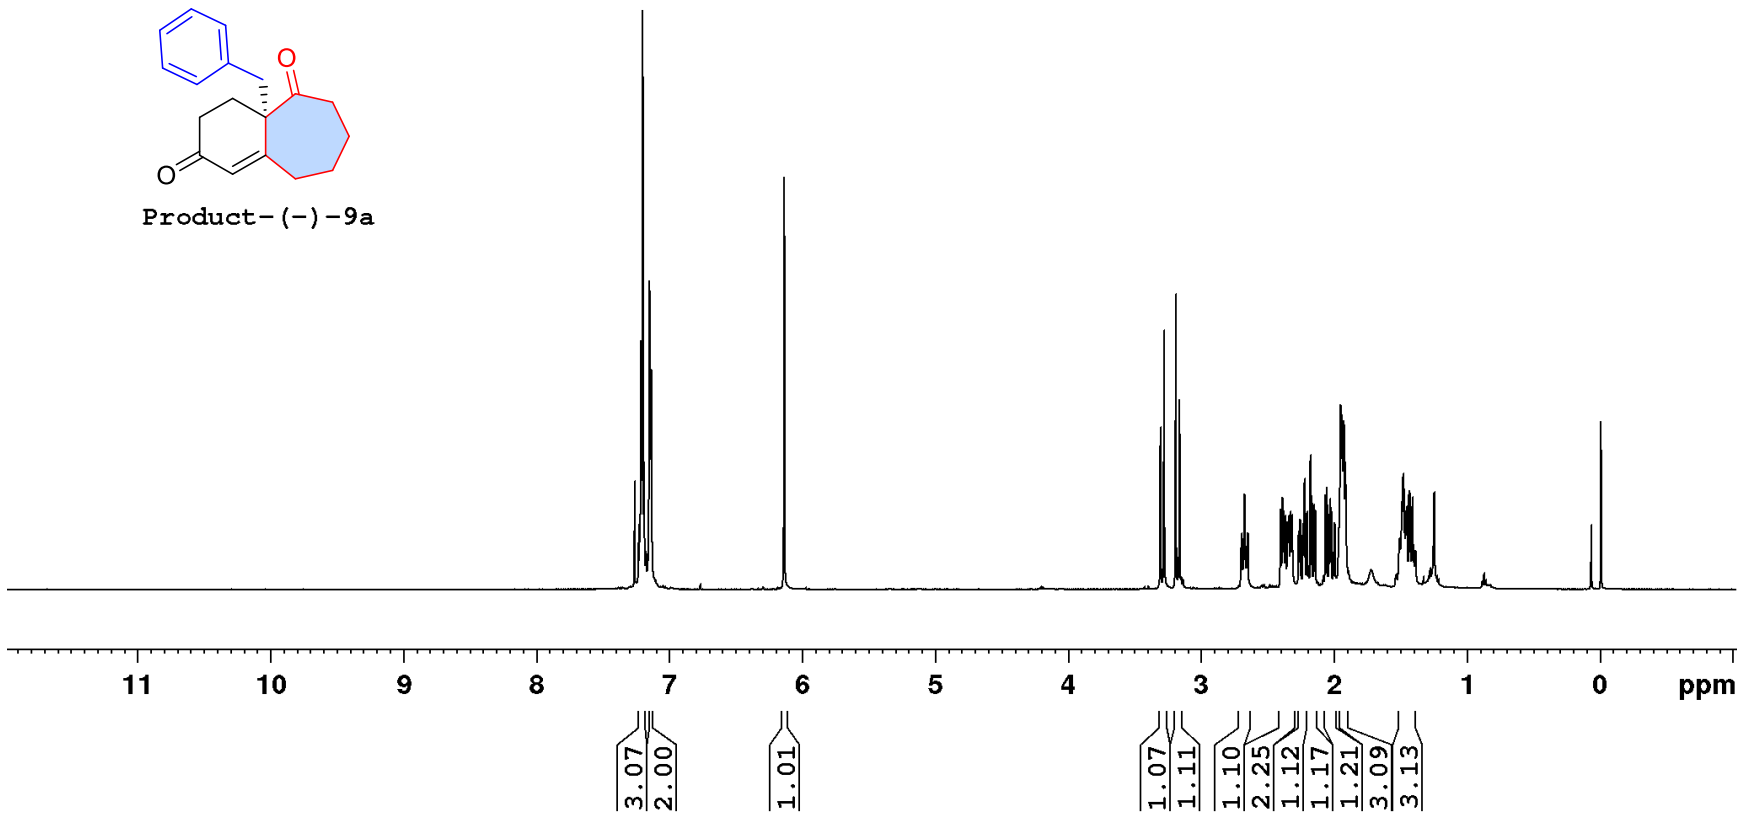

—211.15

—197.58

—165.14

137.35  
130.62  
130.28  
128.30  
126.85

77.25  
76.99 CDCl<sub>3</sub>  
76.74

—57.49

40.54  
39.03  
36.49  
32.49  
31.48  
31.17  
27.09

<sup>13</sup>C{<sup>1</sup>H} NMR 125 MHz CDCl<sub>3</sub>

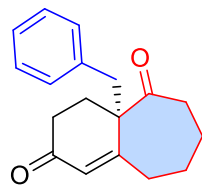

Product-(-)-9a

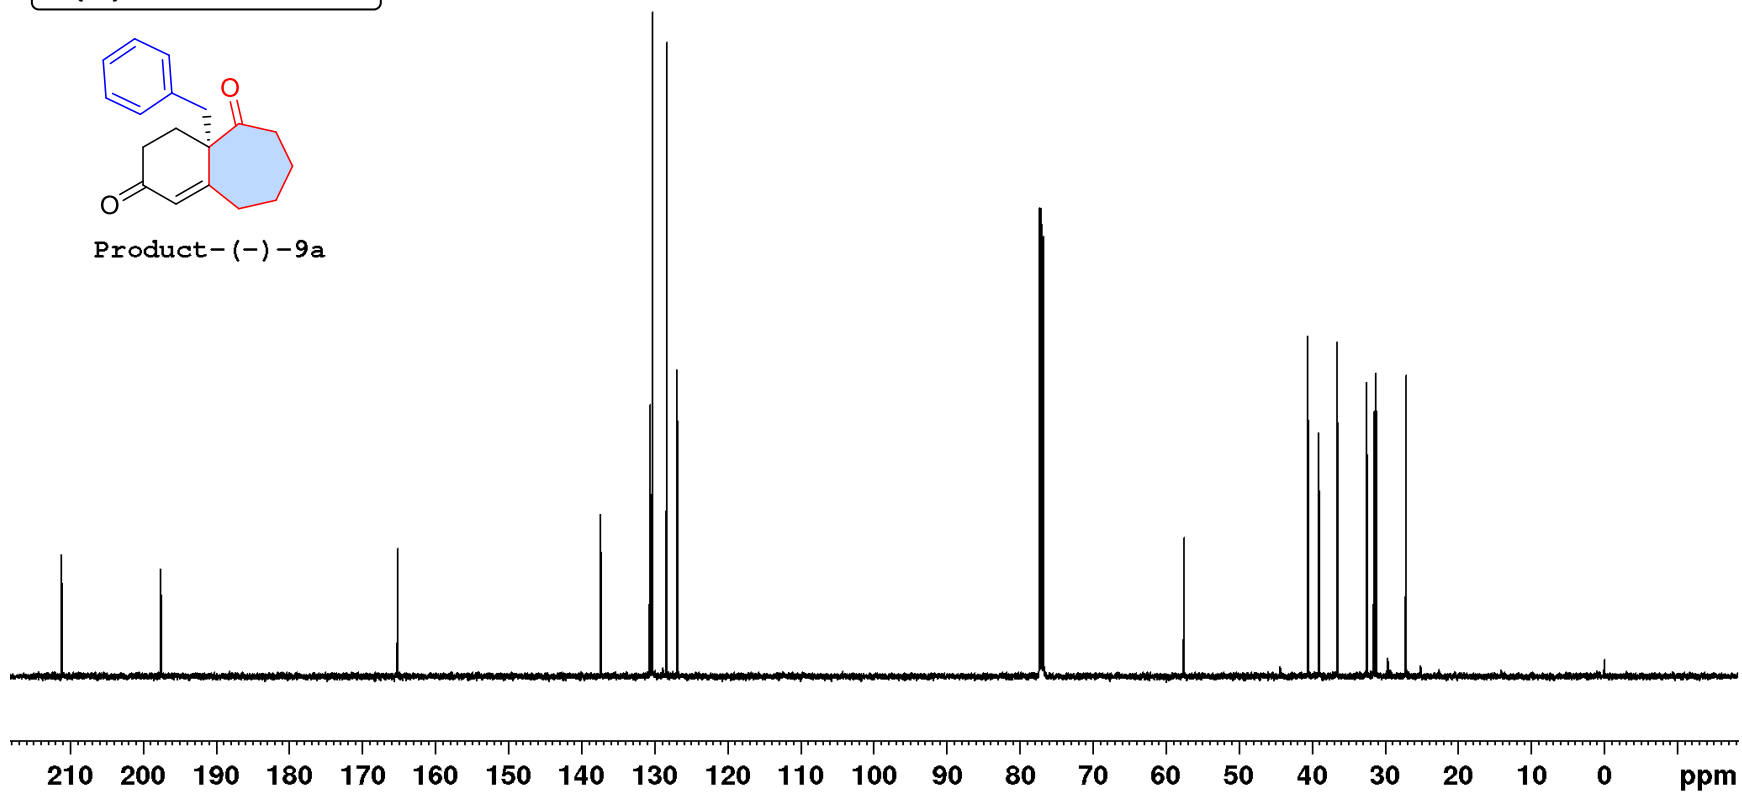

DEPT-135 125 MHz CDCl<sub>3</sub>

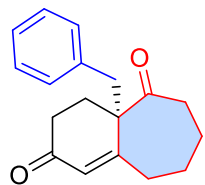

Product-(-)-9a

130.67  
130.32  
128.36  
126.91

40.60  
39.06  
36.55  
32.54  
31.54  
31.21  
27.16

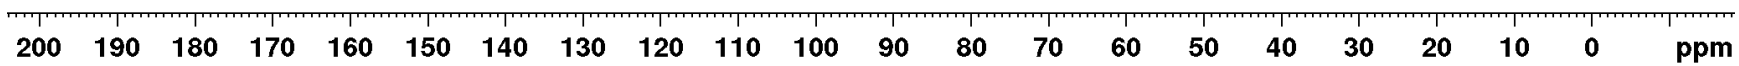

7.284CDCl<sub>3</sub>

7.162  
7.151  
7.144  
7.138  
7.133  
6.956  
6.943  
6.939  
6.935  
6.922  
6.167  
3.349  
3.322  
3.146  
3.119  
2.690  
2.687  
2.430  
2.416  
2.407  
2.393  
2.365  
2.361  
2.356  
2.336  
2.333  
2.323  
2.311  
2.301  
2.233  
2.223  
2.206  
2.202  
2.198  
2.193  
2.171  
2.166  
2.160  
1.977  
1.974  
1.969  
1.966  
1.955  
1.950  
1.945  
1.941  
1.930  
1.925  
1.919  
1.504  
1.485  
1.481  
1.461  
1.301  
1.296  
1.276  
1.271

<sup>1</sup>H NMR 500 MHz CDCl<sub>3</sub>

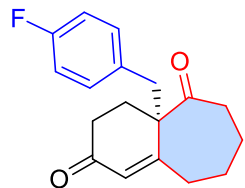

Product-(-)-9d

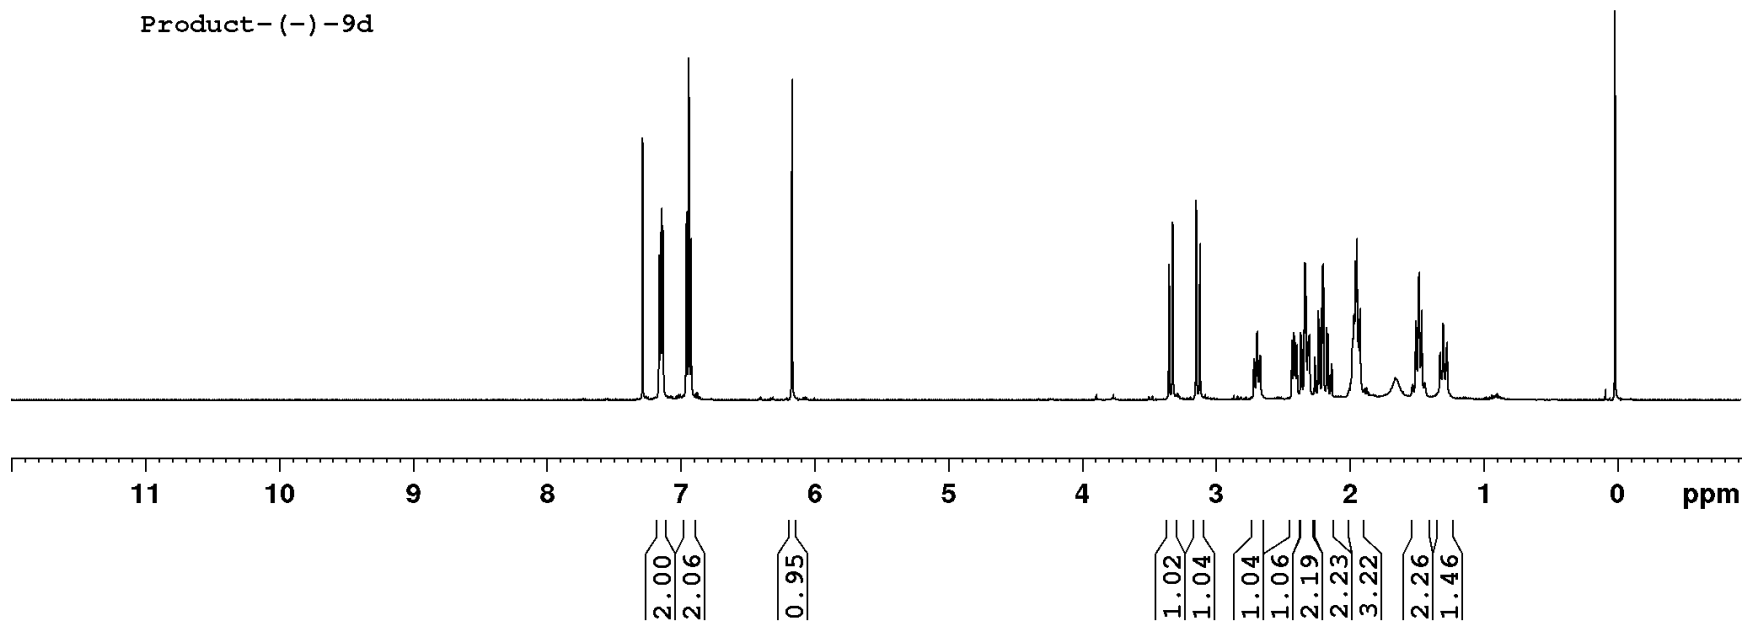

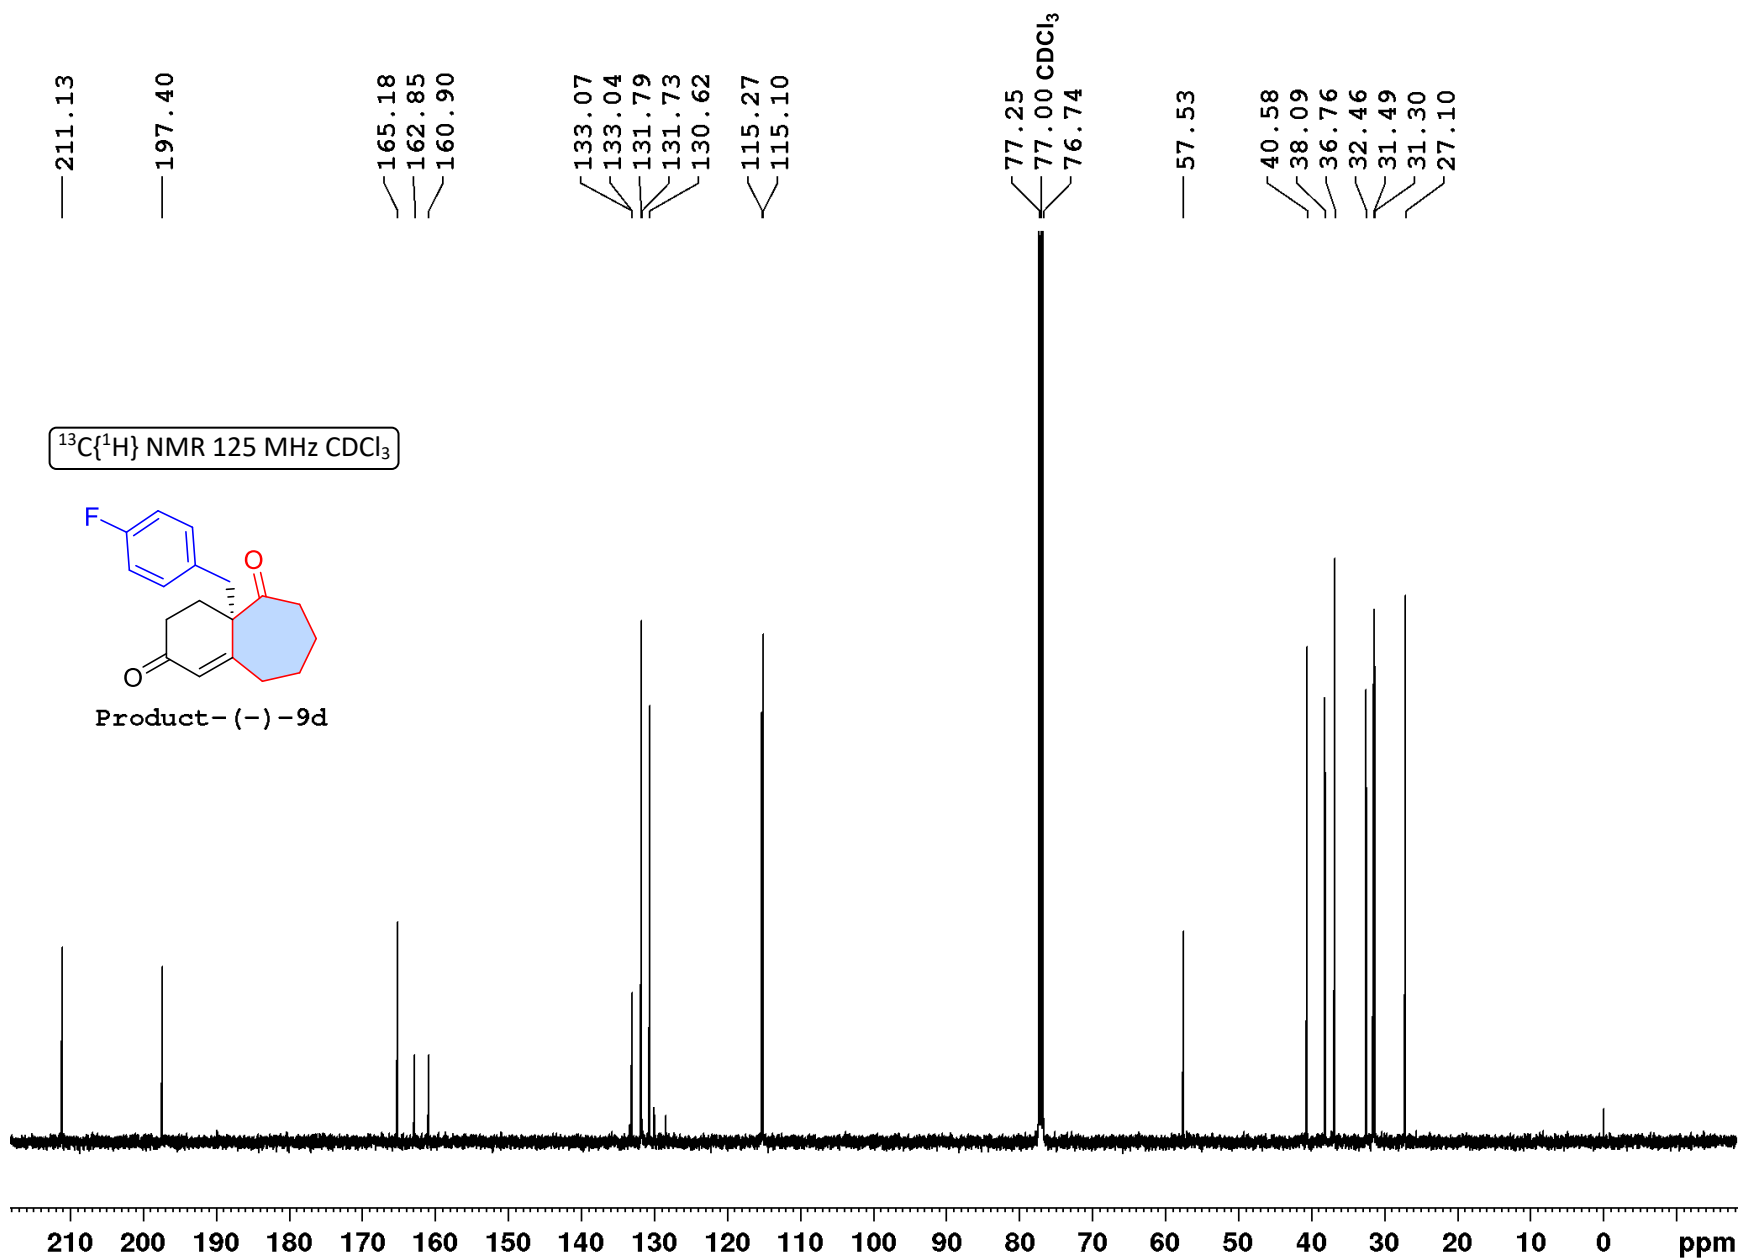

DEPT-135 125 MHz CDCl<sub>3</sub>

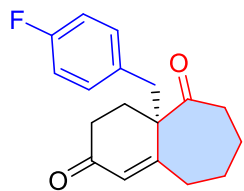

Product-(-)-9d

131.83  
131.77  
130.66

115.32  
115.15

40.62  
38.12  
36.81  
32.50  
31.54  
31.33  
27.16

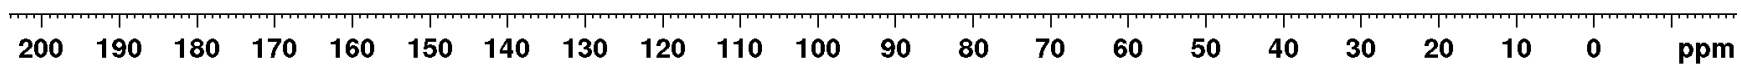



<sup>19</sup>F NMR 375 MHz CDCl<sub>3</sub>

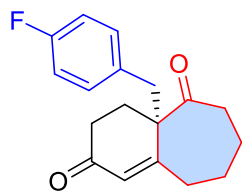

Product-(-)-9d

-115.71

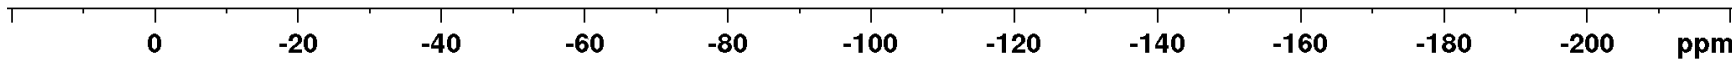

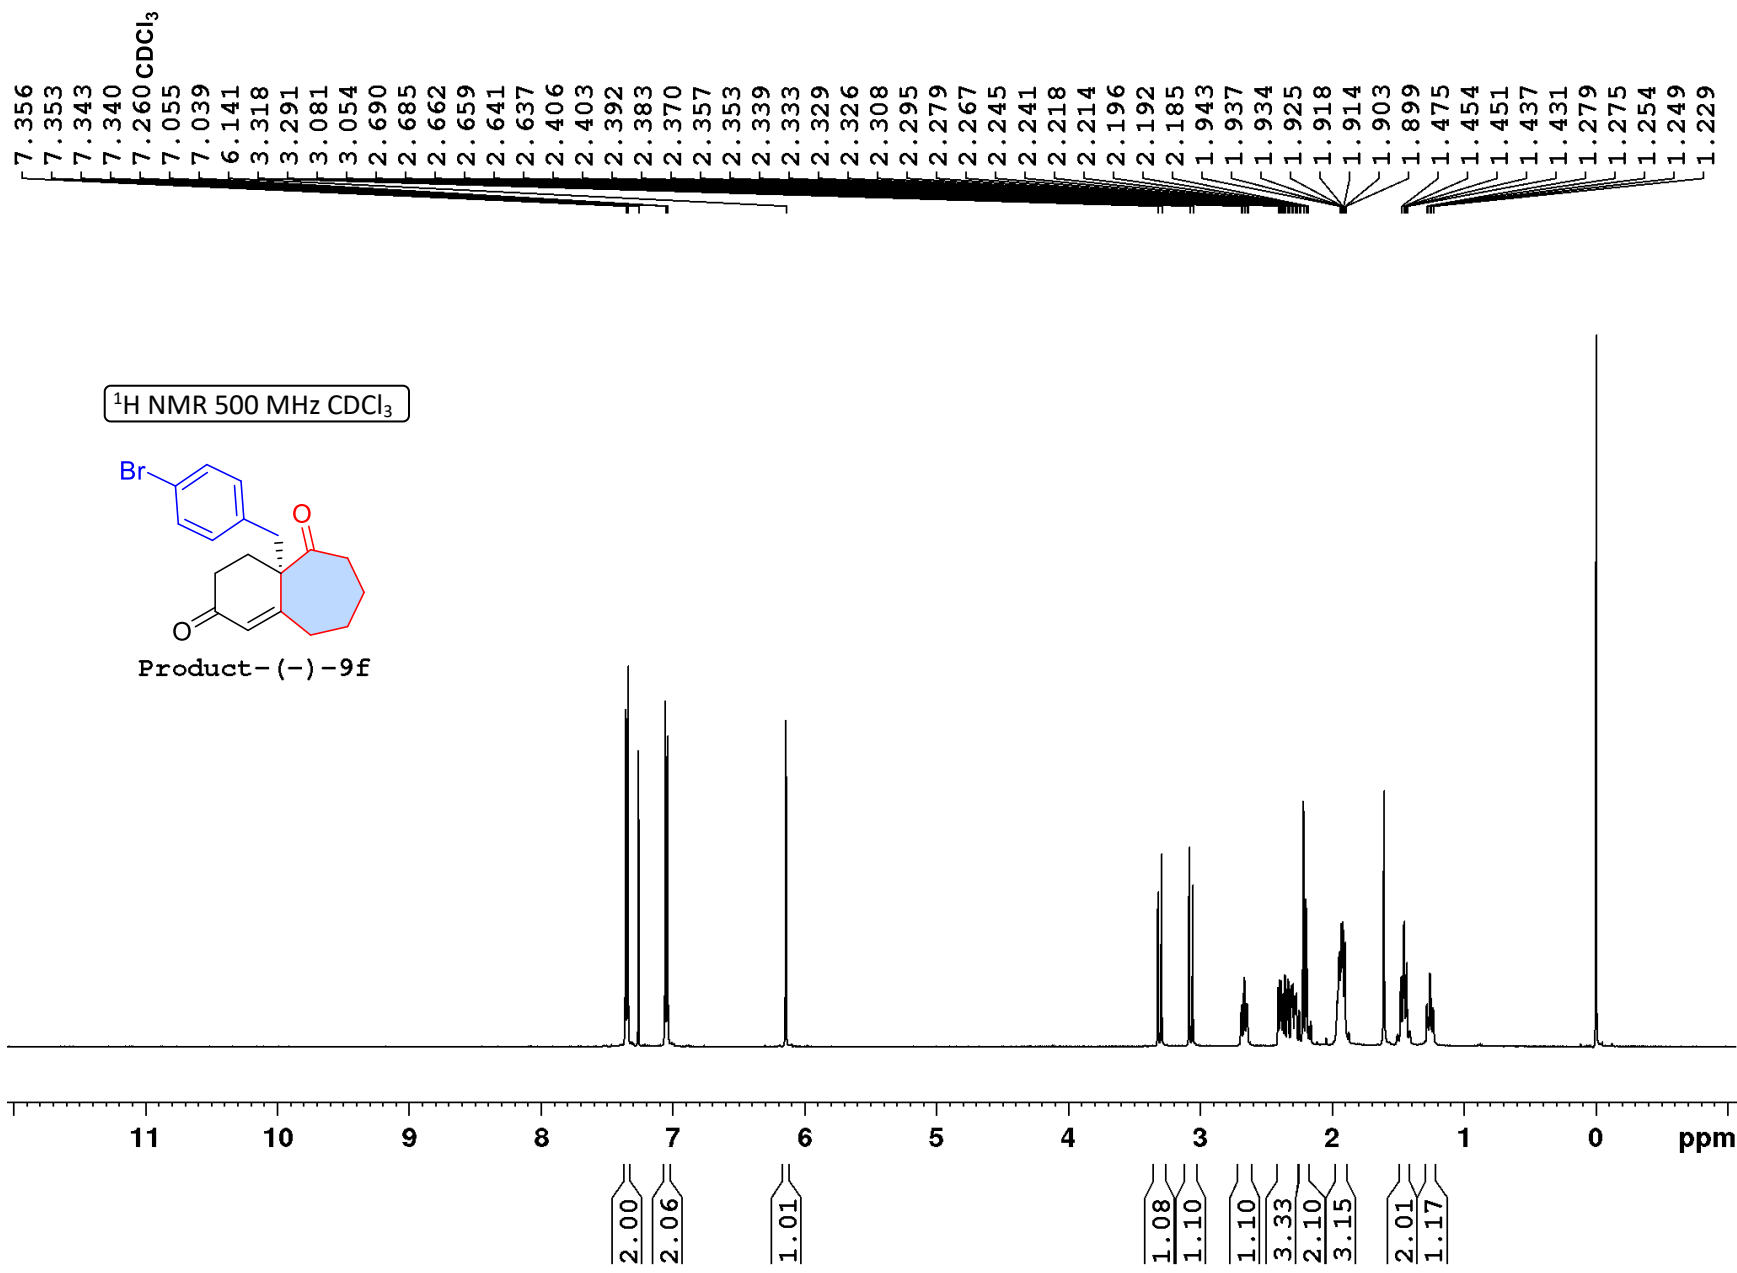

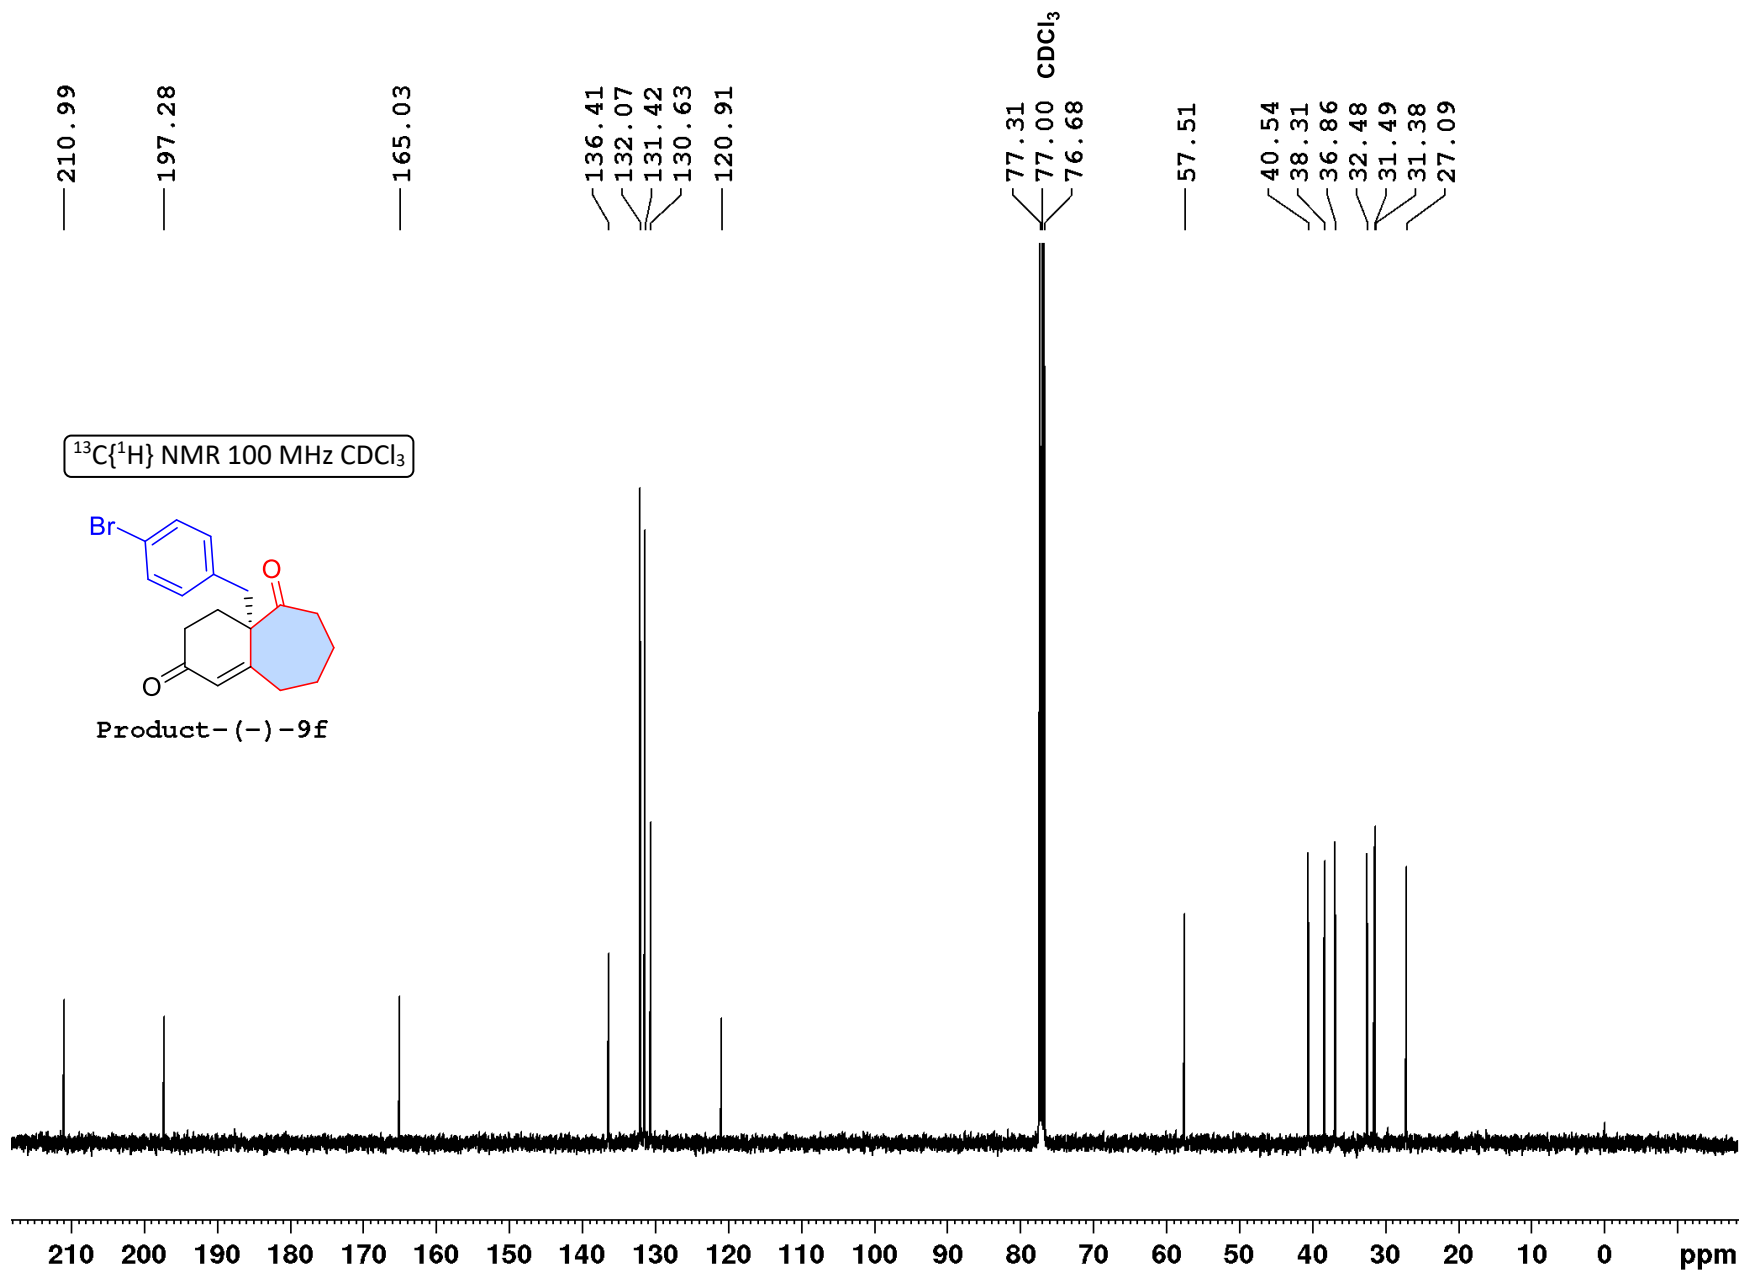

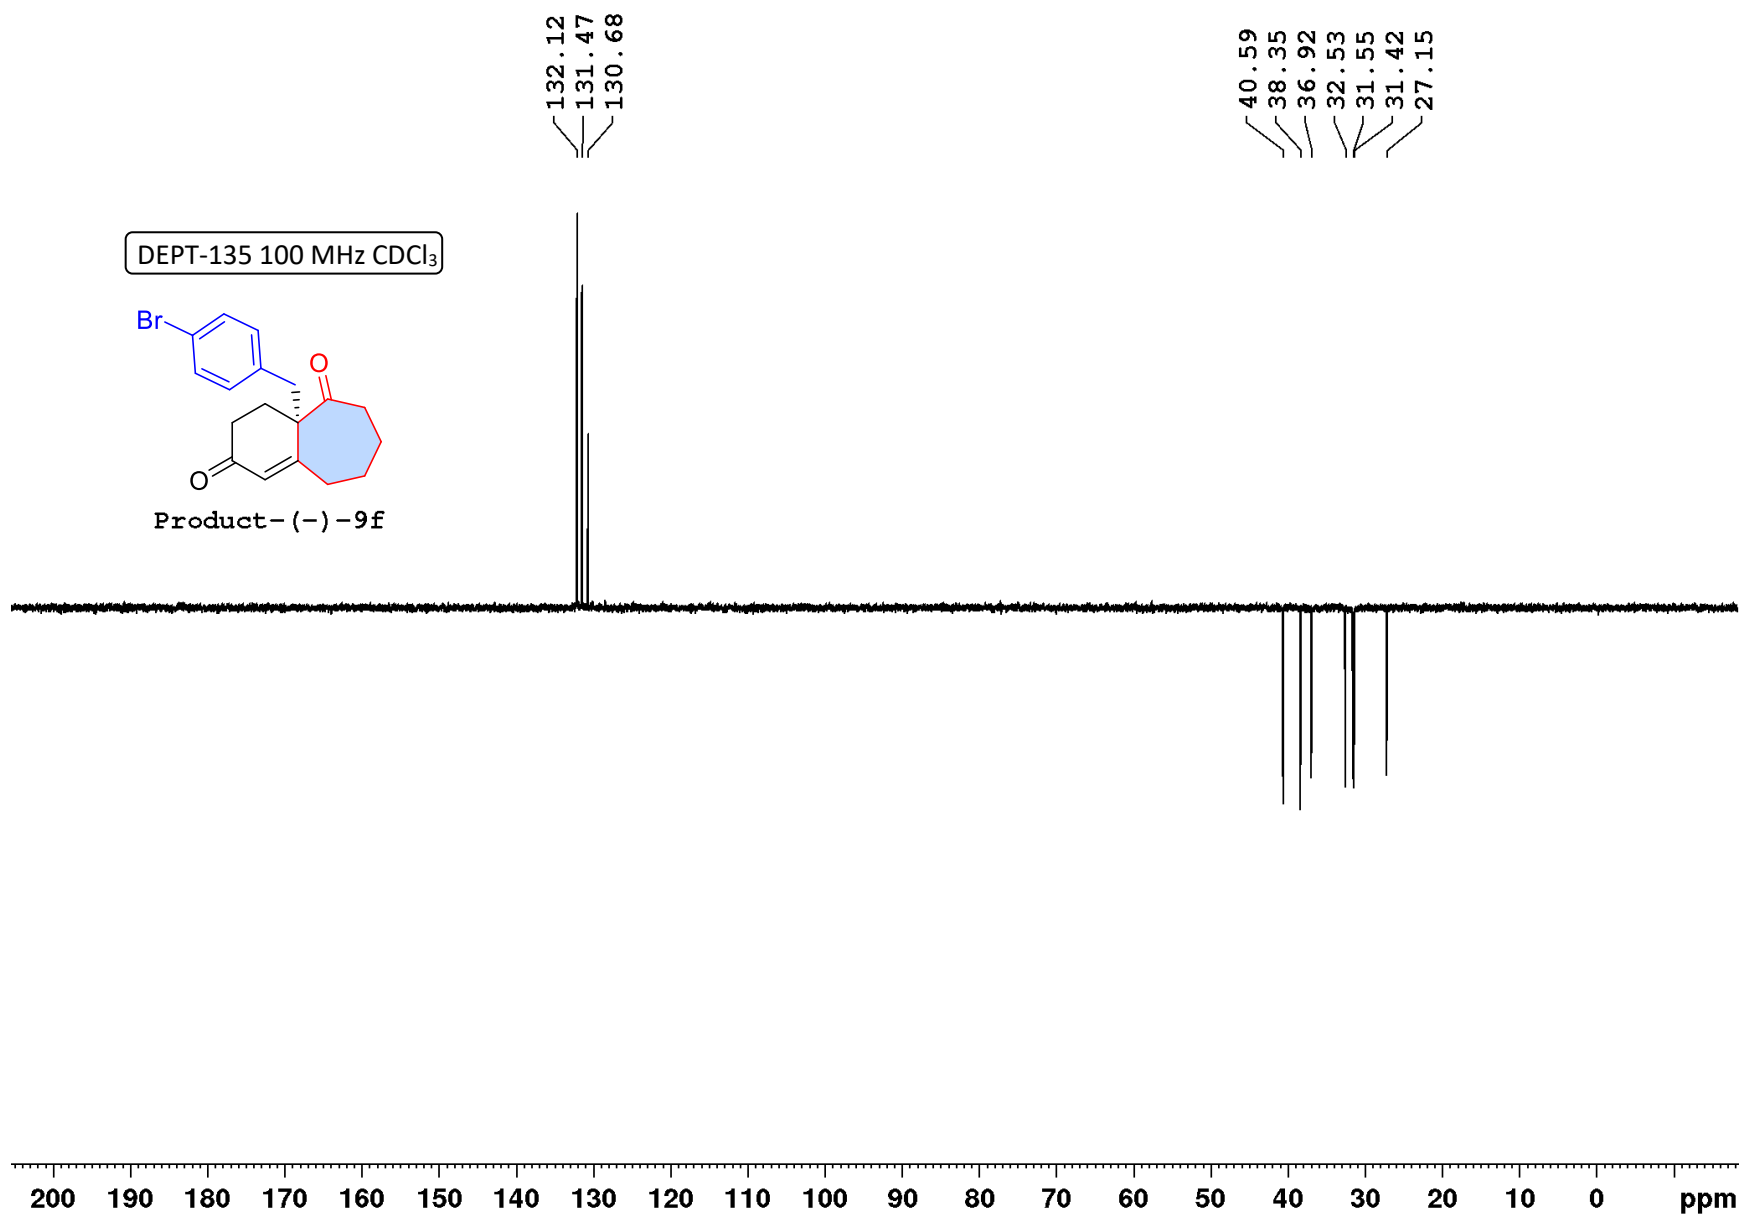

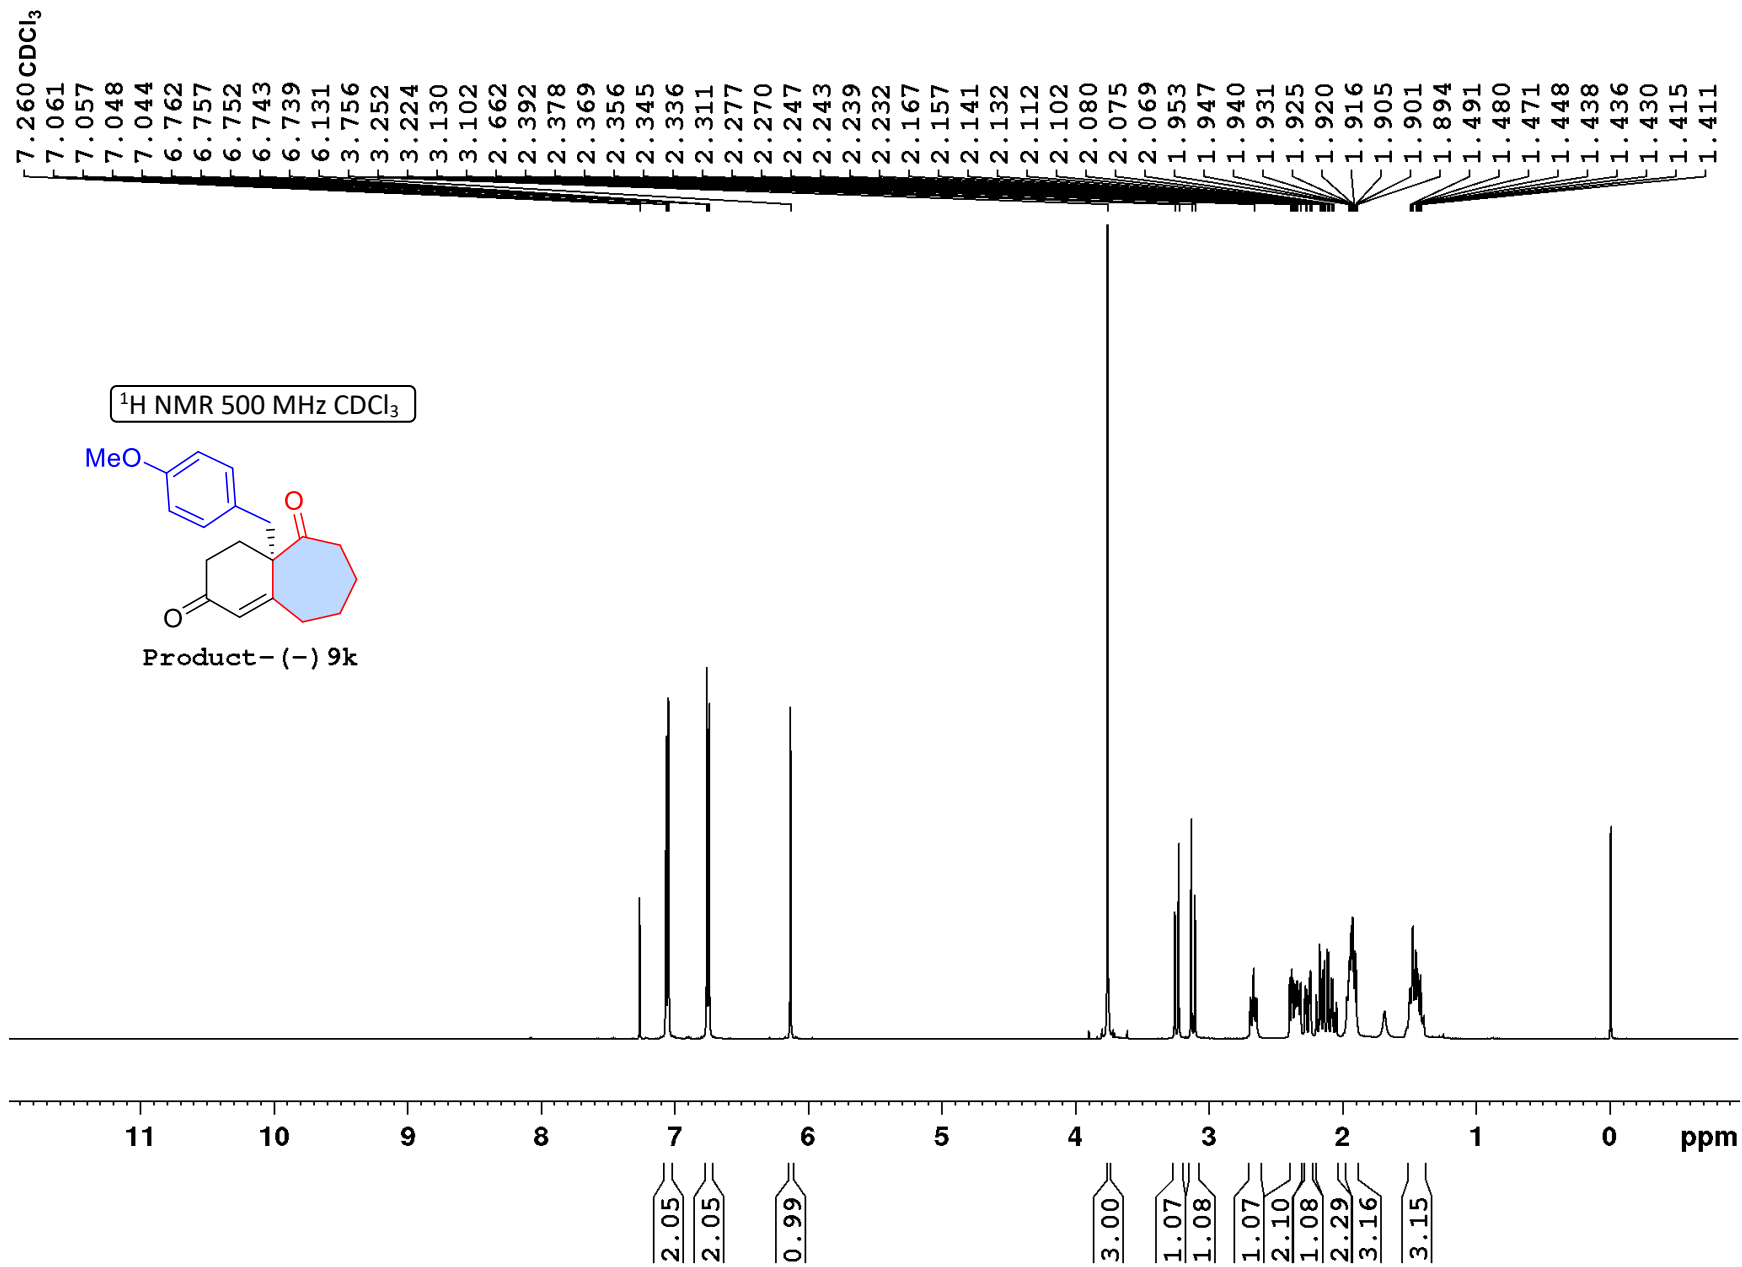

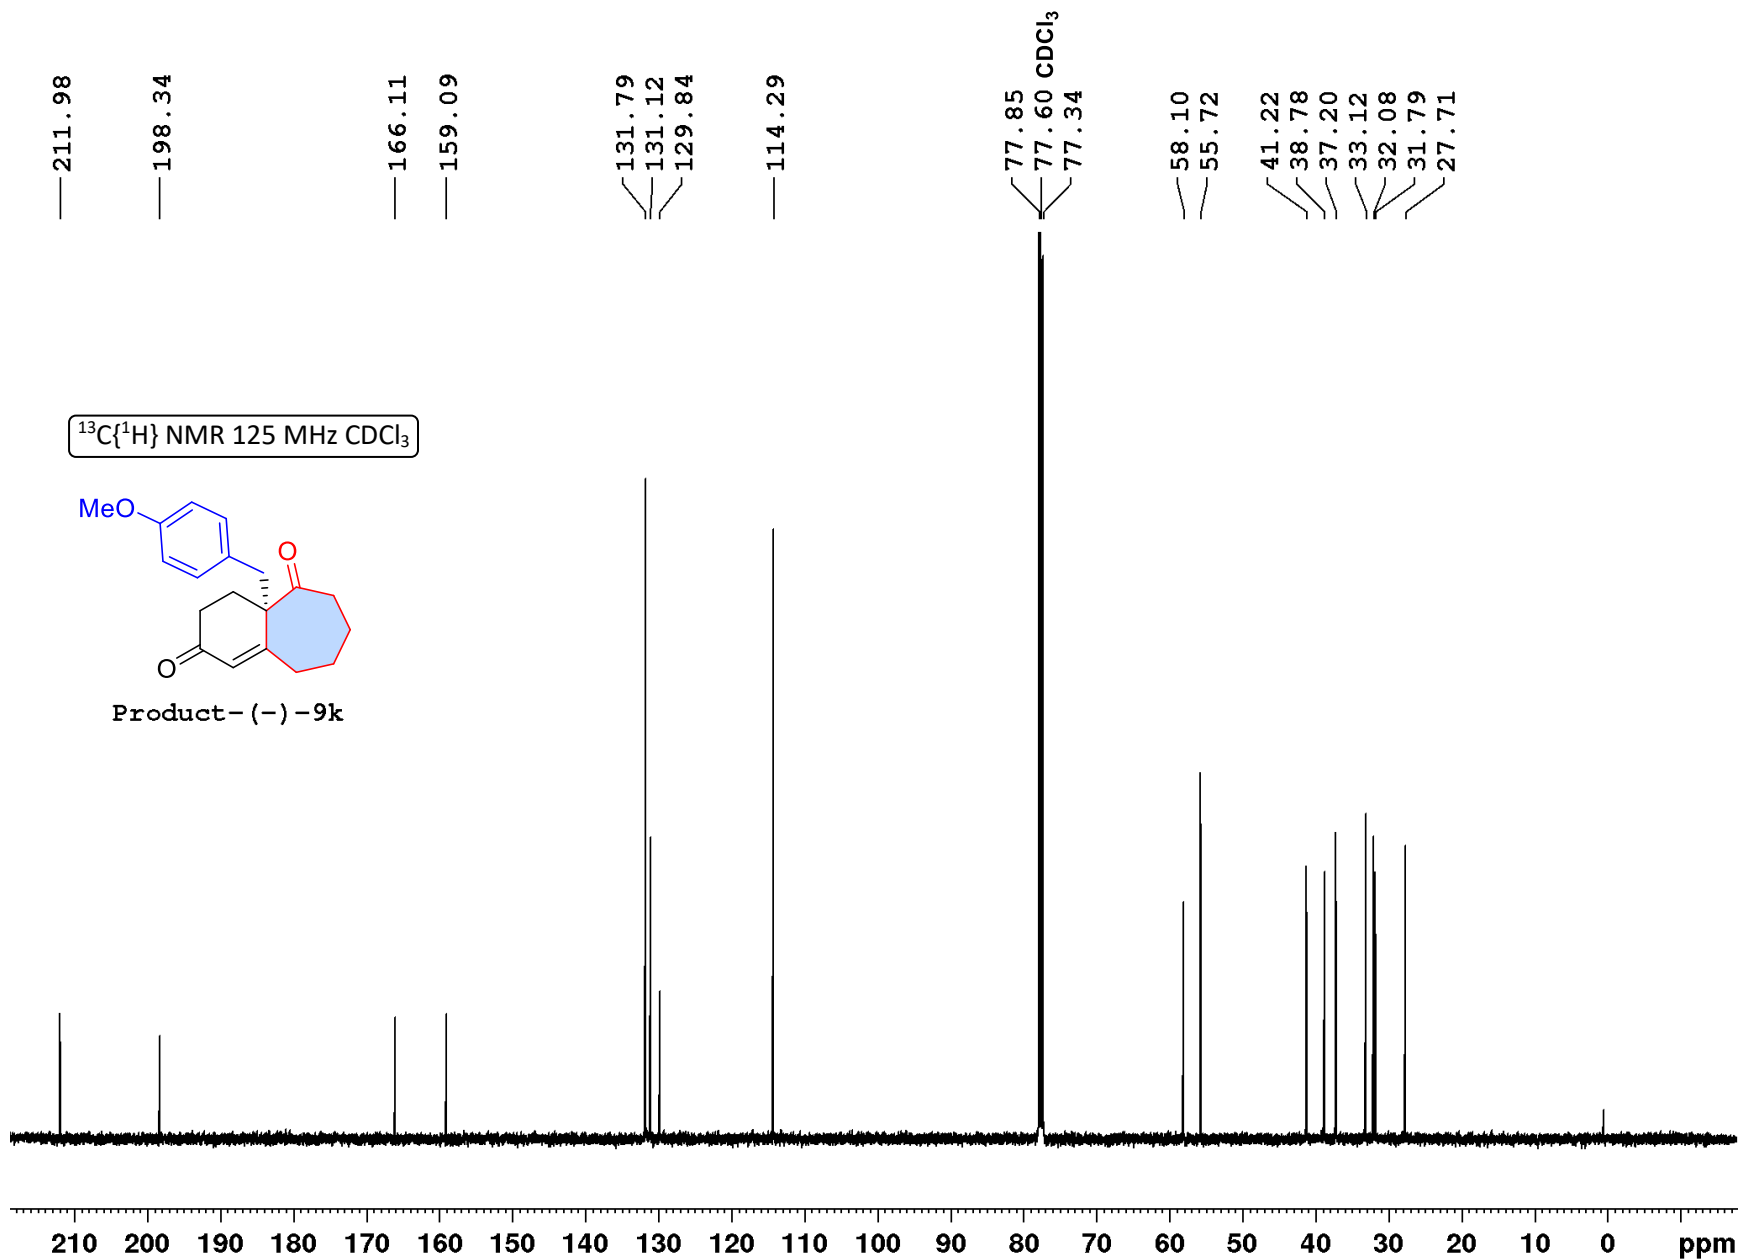

DEPT-135 125 MHz CDCl<sub>3</sub>

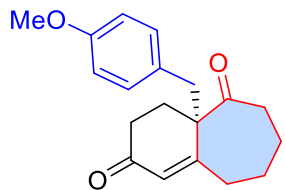

Product - (-) -9k

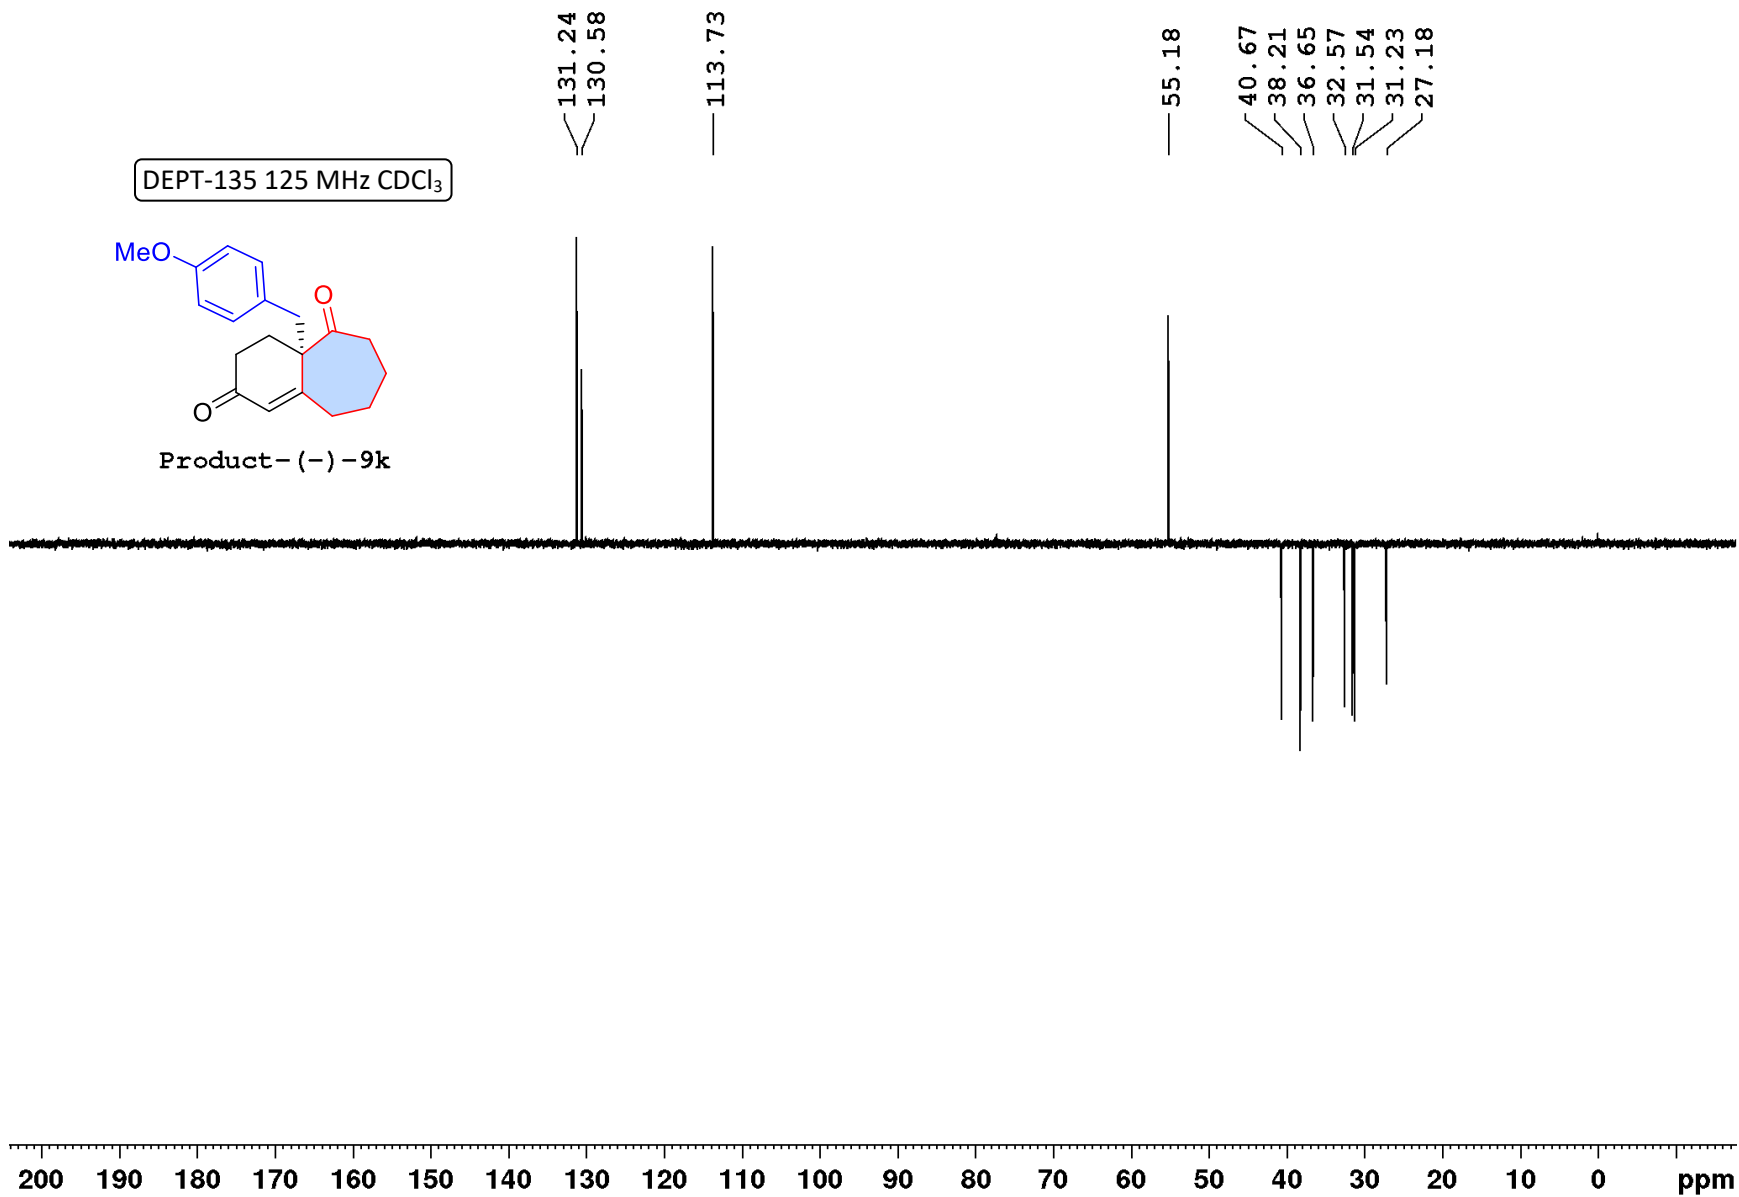

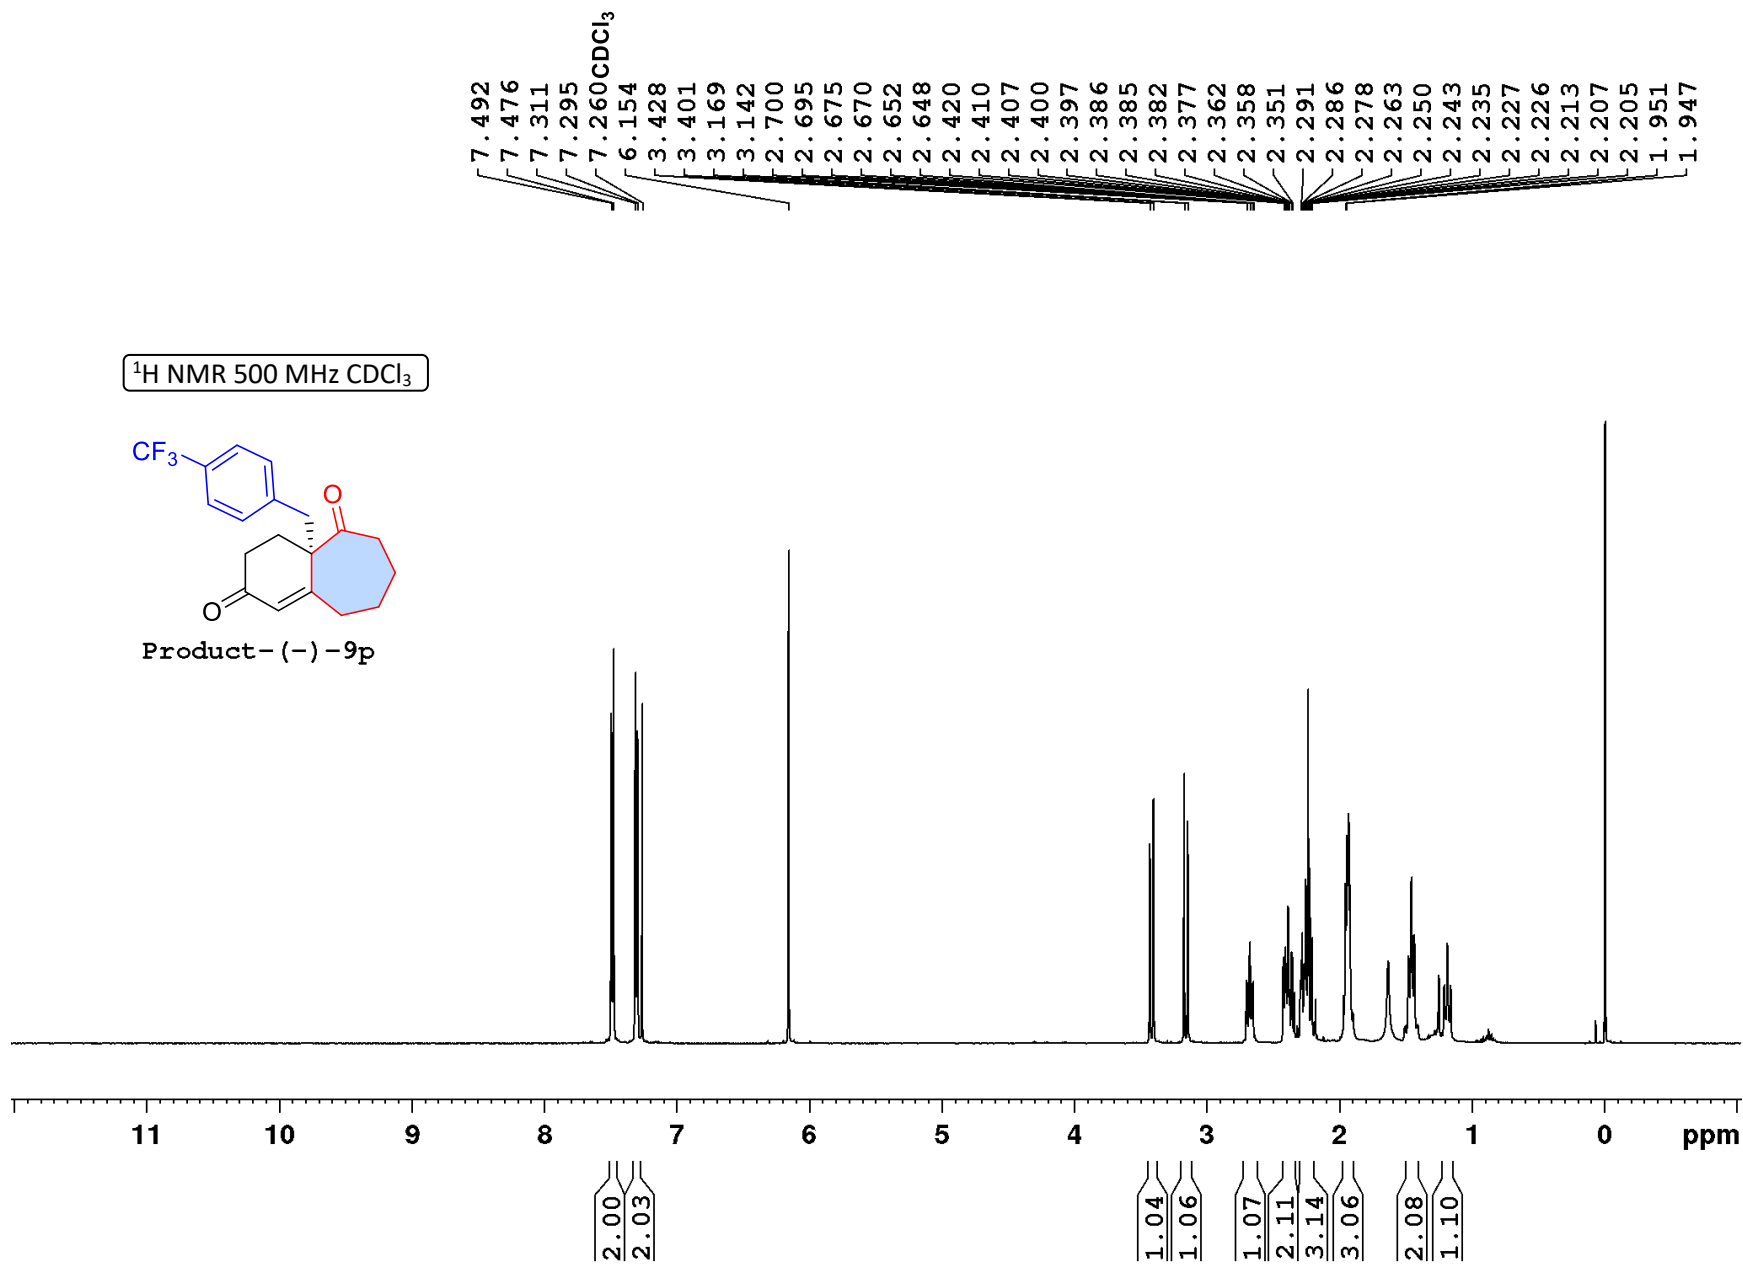



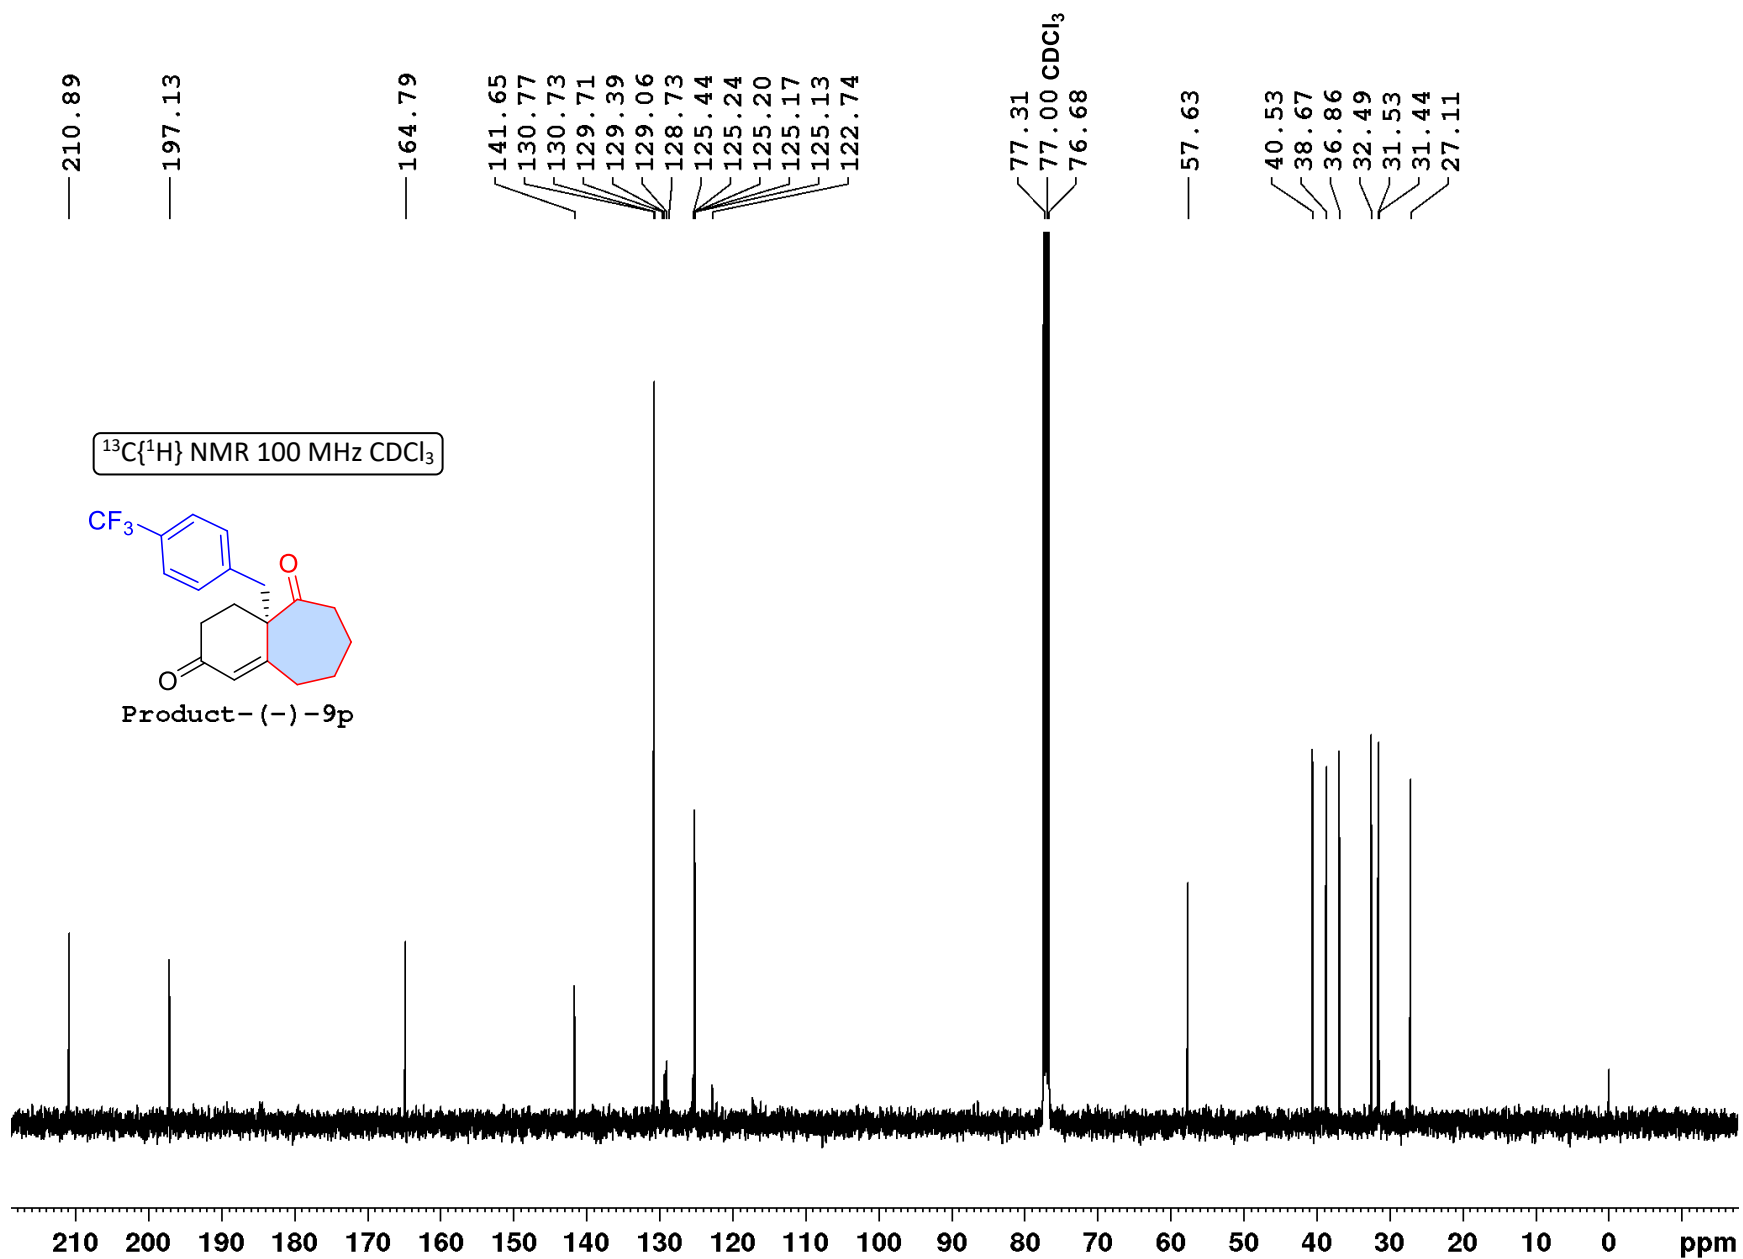

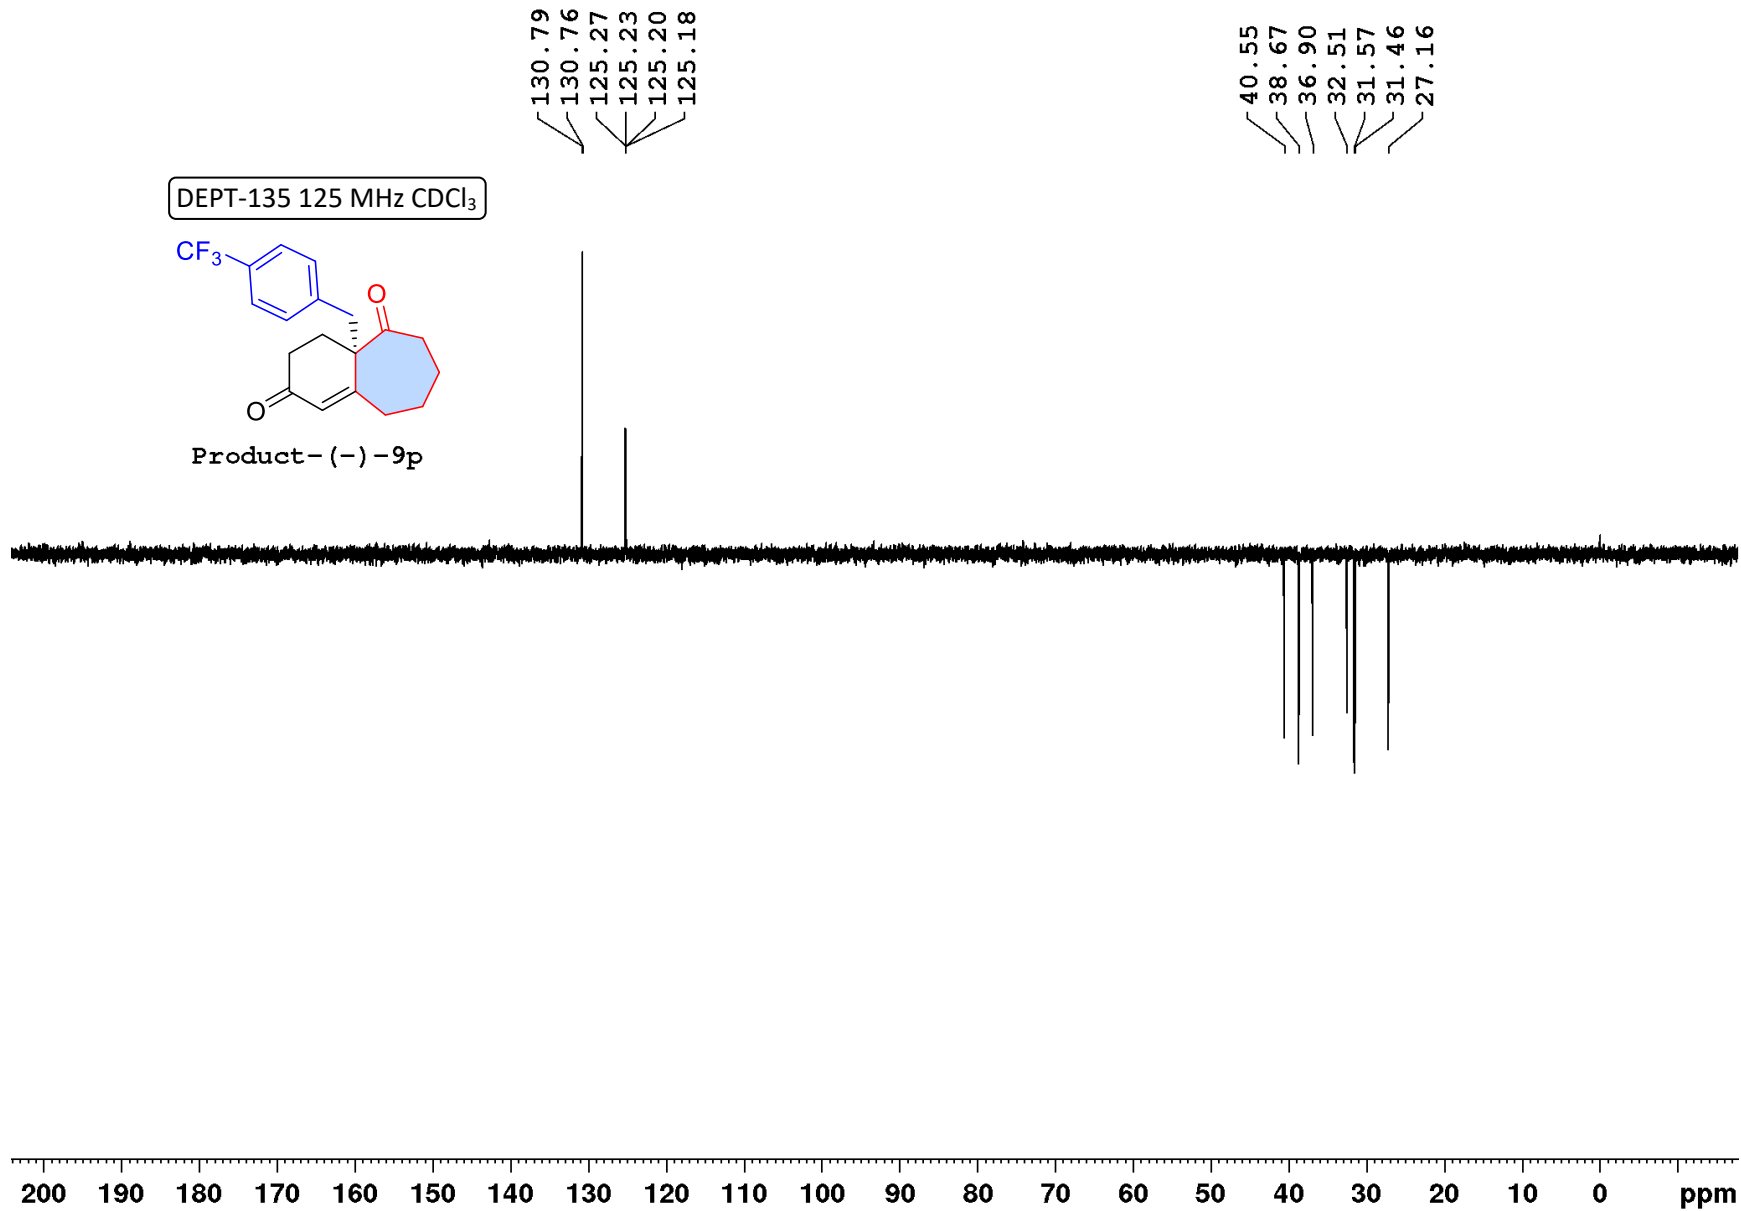

$^{19}\text{F}$  NMR 375 MHz  $\text{CDCl}_3$

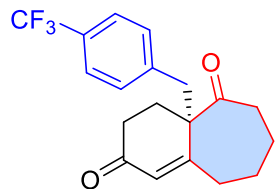

Product - (-)-9p

-62.42

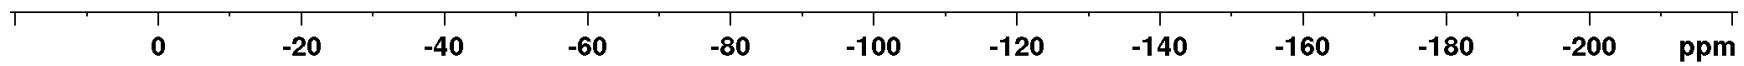

7.260 CDCl<sub>3</sub>  
 7.256  
 7.254  
 7.252  
 7.251  
 6.262  
 6.259  
 6.256  
 6.252  
 6.115  
 6.086  
 6.080  
 3.285  
 3.255  
 3.191  
 3.161  
 2.665  
 2.663  
 2.660  
 2.454  
 2.405  
 2.392  
 2.382  
 2.369  
 2.332  
 2.327  
 2.321  
 2.303  
 2.297  
 2.295  
 2.287  
 2.171  
 2.161  
 2.144  
 2.135  
 2.113  
 2.104  
 2.080  
 2.077  
 2.069  
 2.043  
 2.033  
 2.026  
 2.022  
 1.950  
 1.924  
 1.917  
 1.913  
 1.907  
 1.897  
 1.892  
 1.886  
 1.882  
 1.556  
 1.552  
 1.515  
 1.509  
 1.505

<sup>1</sup>H NMR 500 MHz CDCl<sub>3</sub>

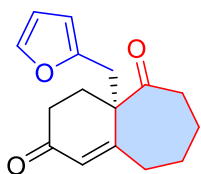

Product-(-)-9r

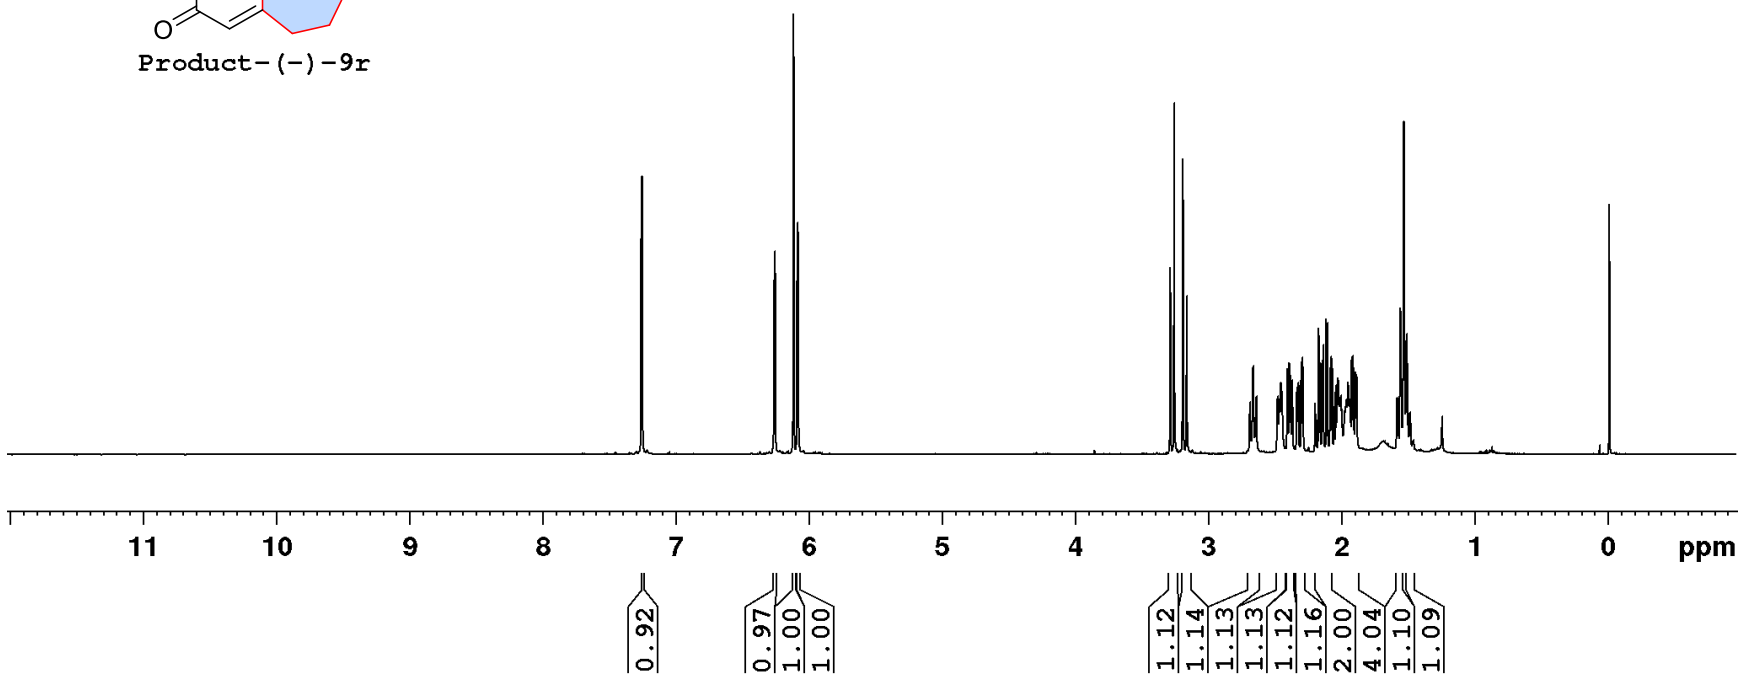

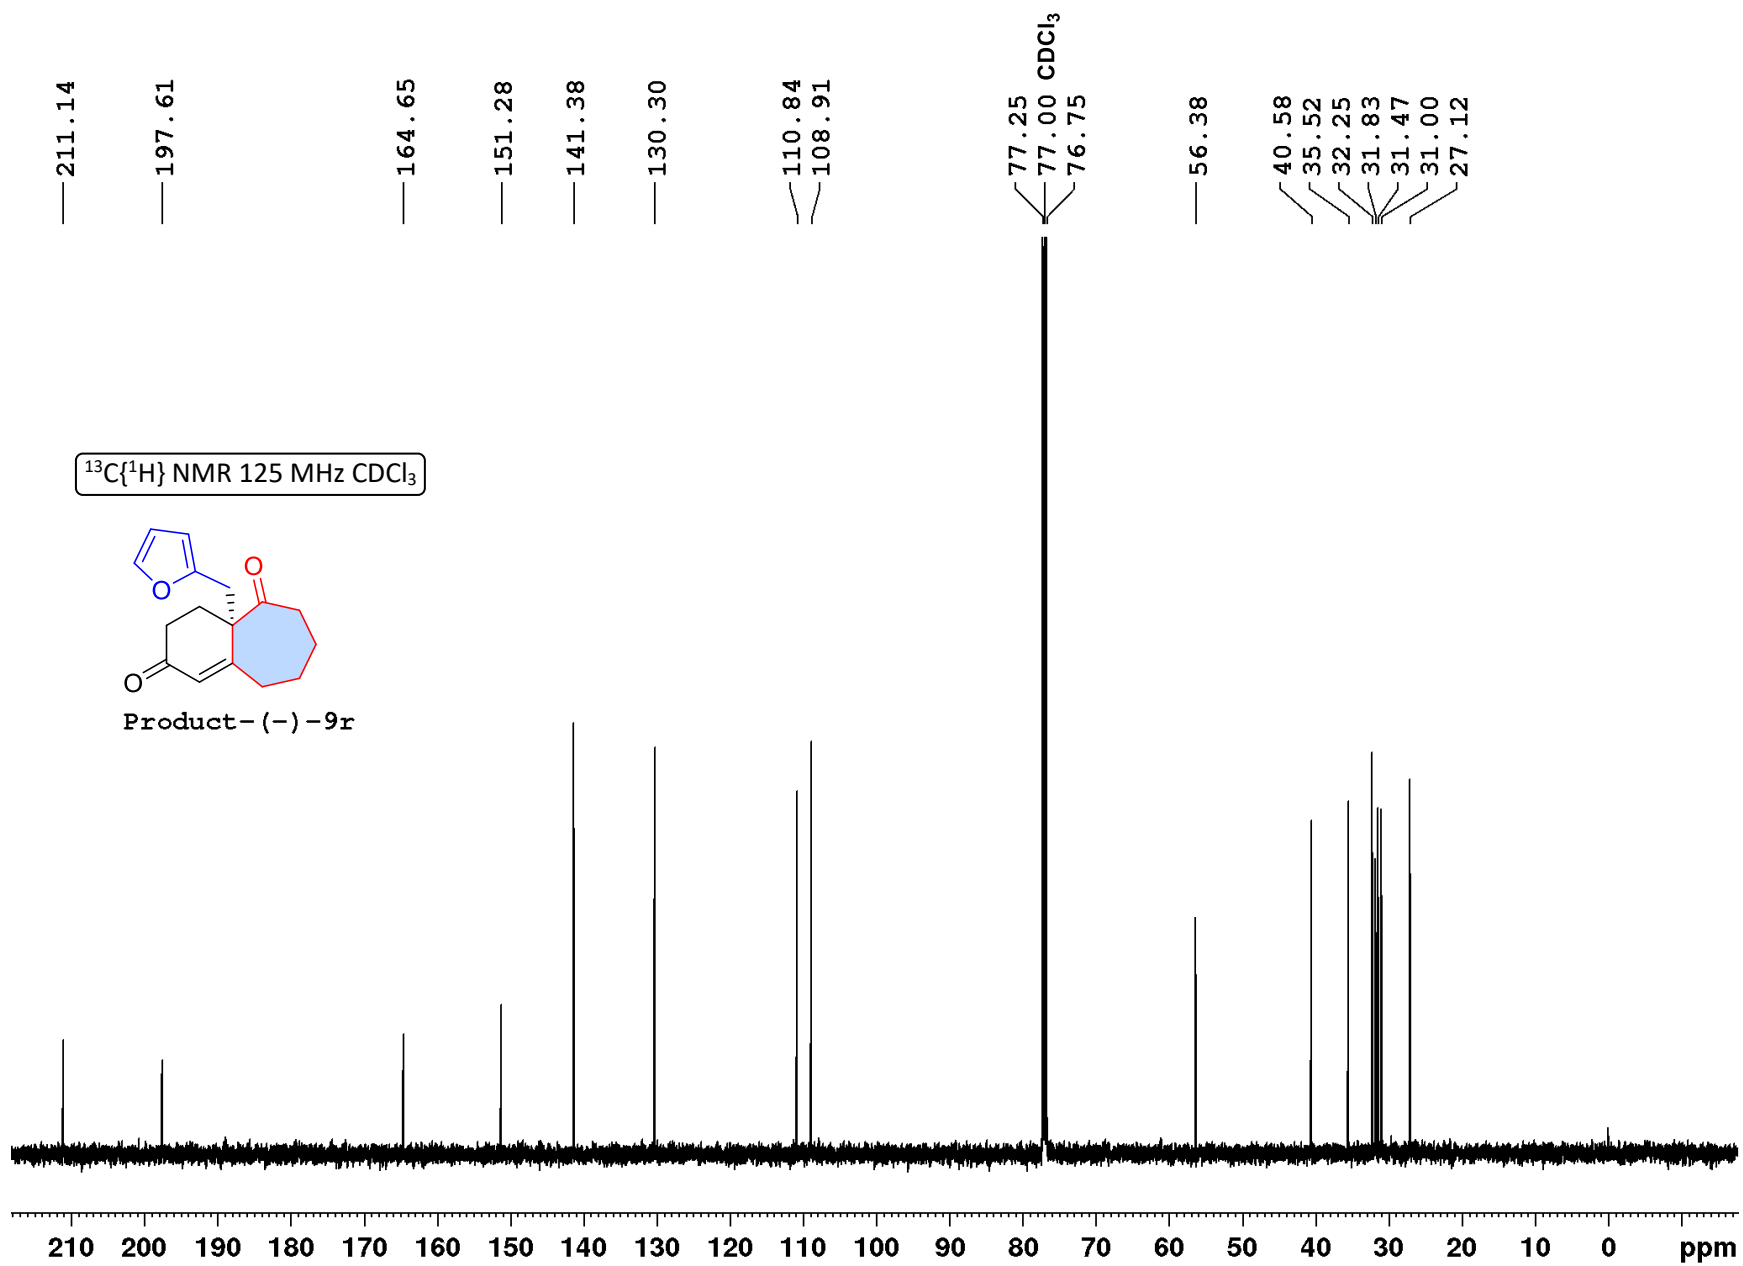

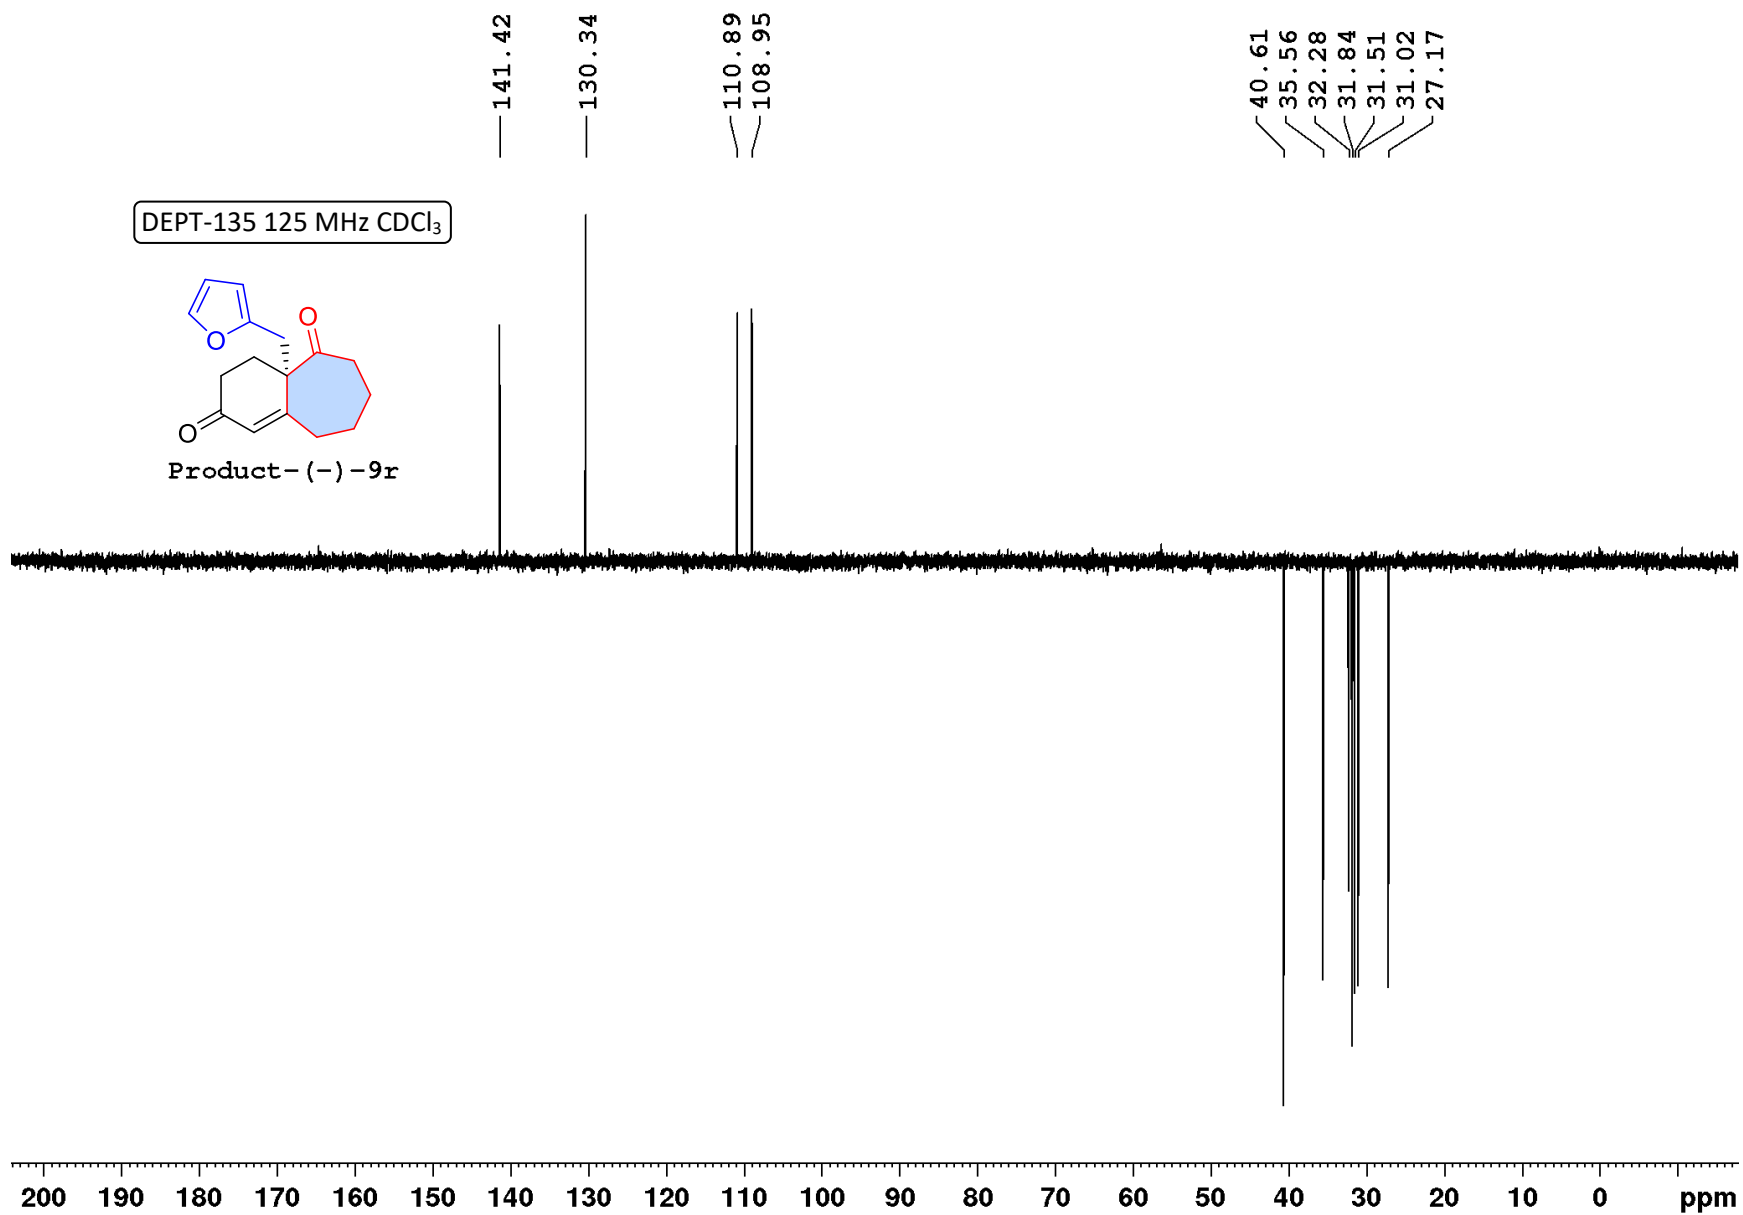

7.260 CDCl<sub>3</sub>

7.147  
7.144  
7.136  
7.134  
6.889  
6.882  
6.879  
6.872  
6.803  
6.797  
6.143  
3.419  
2.693  
2.674  
2.671  
2.669  
2.651  
2.645  
2.435  
2.423  
2.419  
2.413  
2.403  
2.400  
2.396  
2.382  
2.357  
2.338  
2.333  
2.329  
2.282  
2.272  
2.256  
2.246  
2.223  
2.207  
2.197  
1.990  
1.971  
1.965  
1.944  
1.940  
1.934  
1.924  
1.918  
1.909  
1.498  
1.496  
1.494  
1.485  
1.481  
1.476  
1.471  
1.464  
1.462  
1.458  
1.456

<sup>1</sup>H NMR 500 MHz CDCl<sub>3</sub>

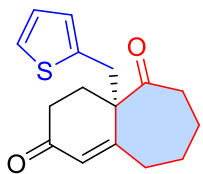

Product-(-)-9s

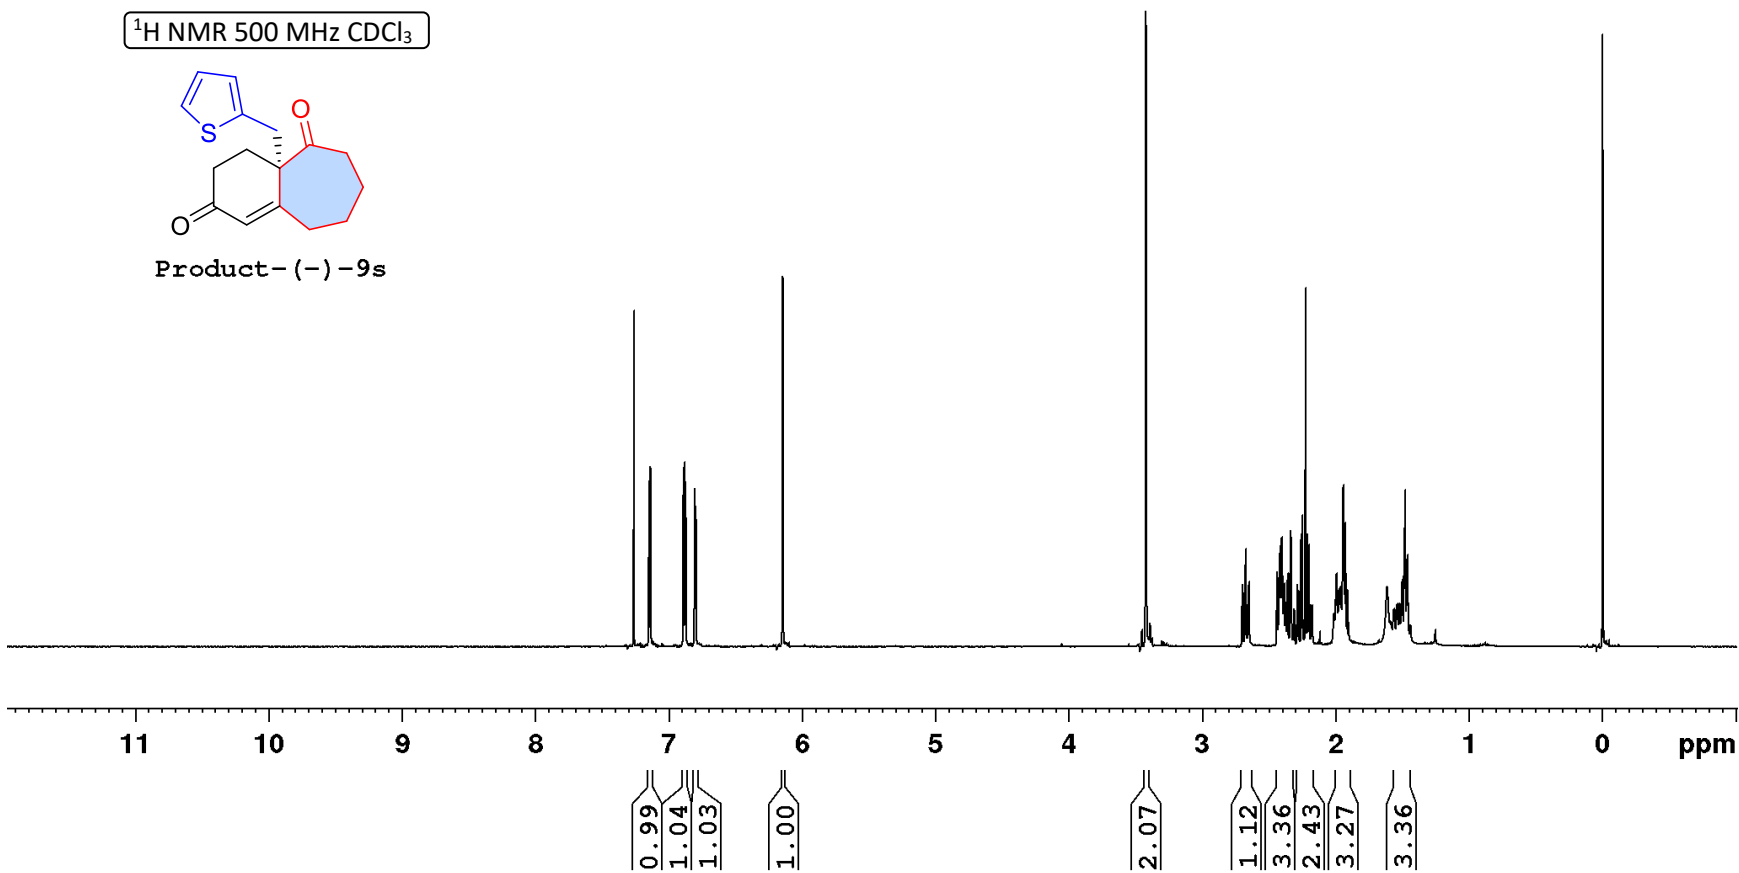

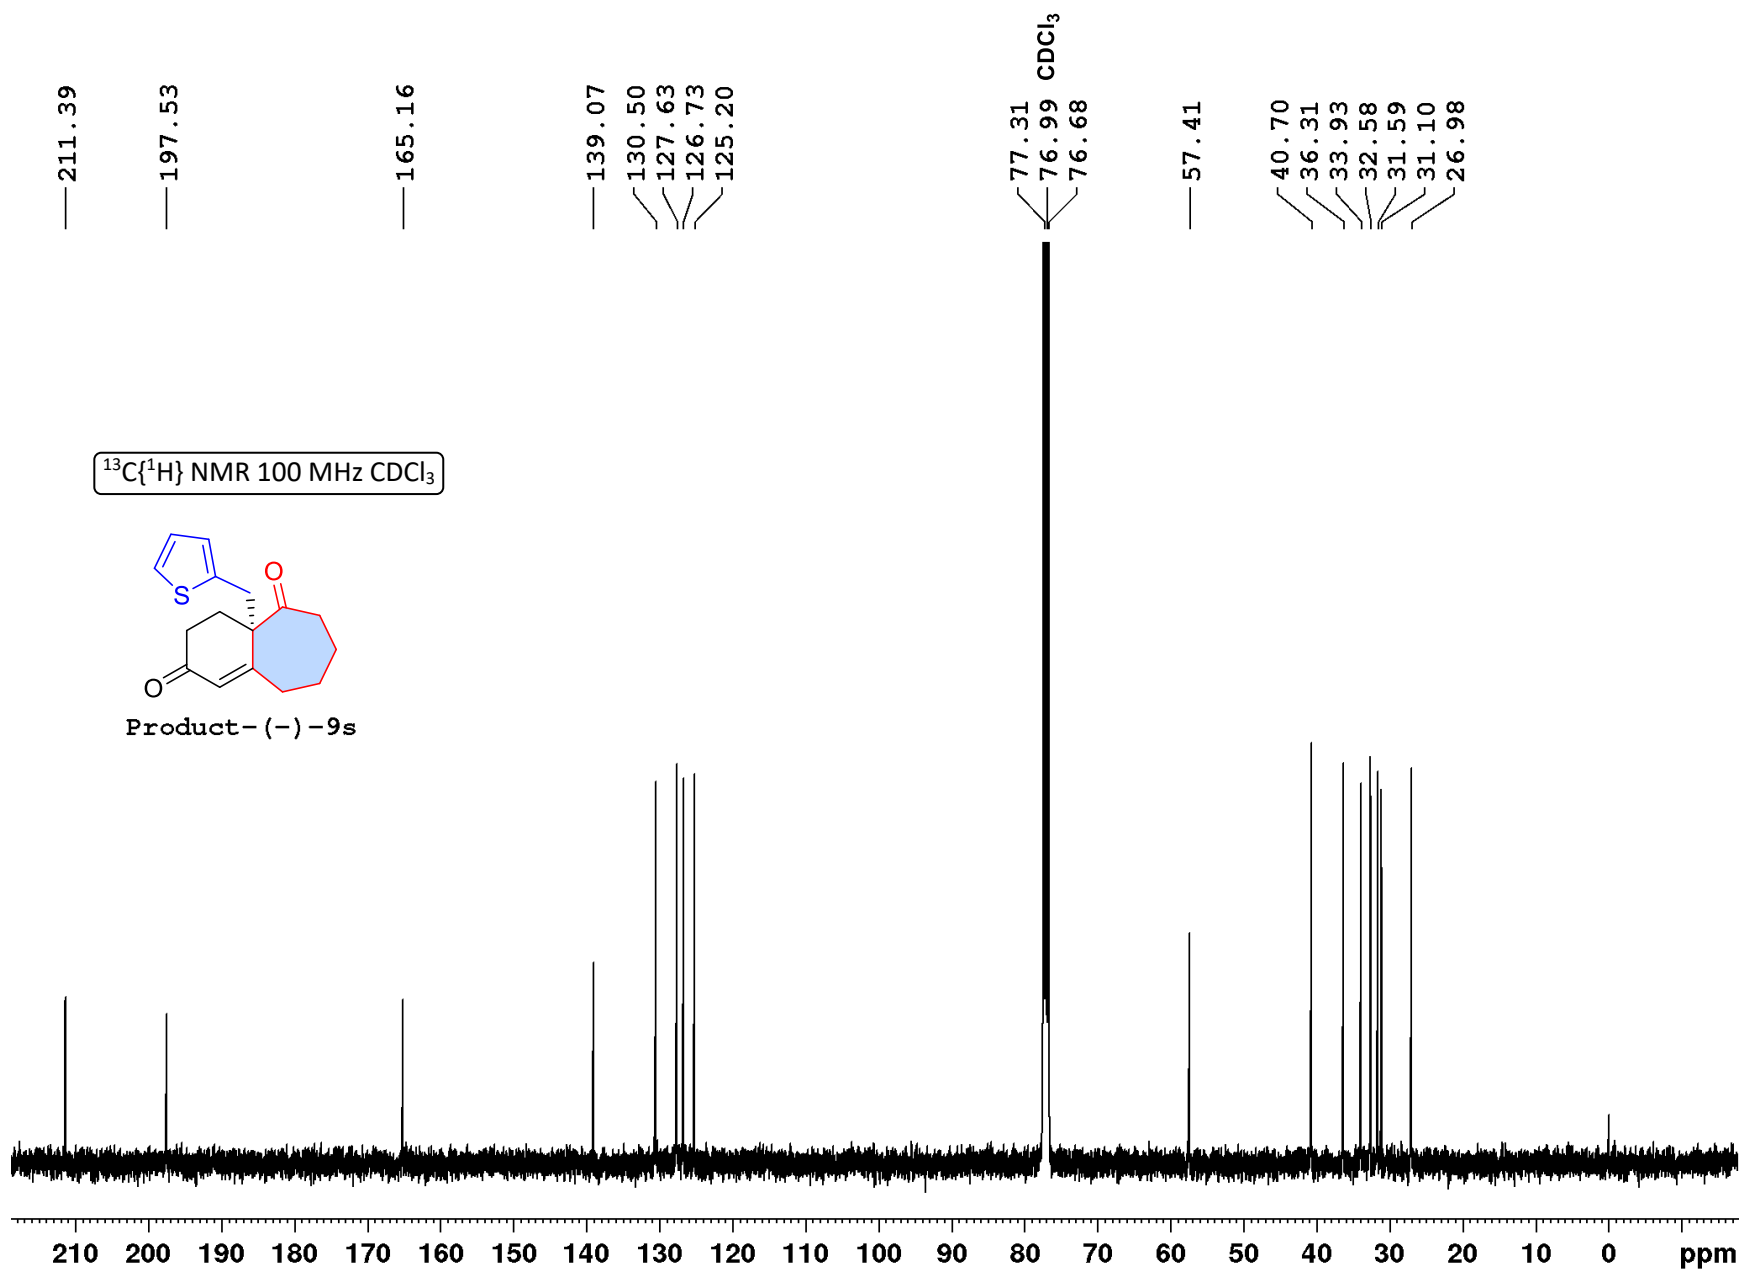



DEPT-135 100 MHz CDCl<sub>3</sub>

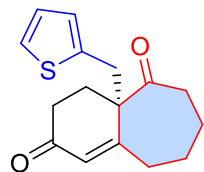

Product-(-)-9s

130.53  
127.66  
126.76  
125.25

40.73  
36.34  
33.95  
32.61  
31.63  
31.12  
27.03

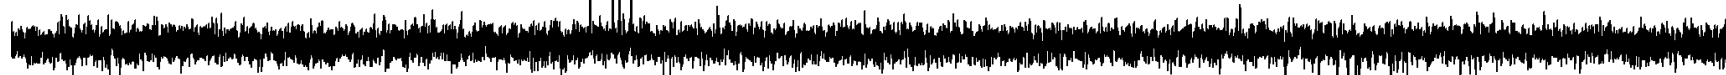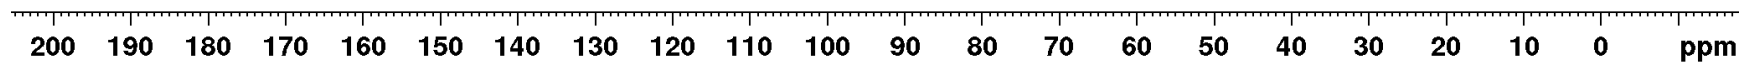

<sup>1</sup>H NMR 500 MHz CDCl<sub>3</sub>

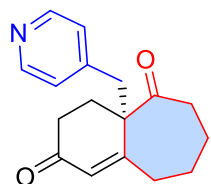

Product-(-)-9u

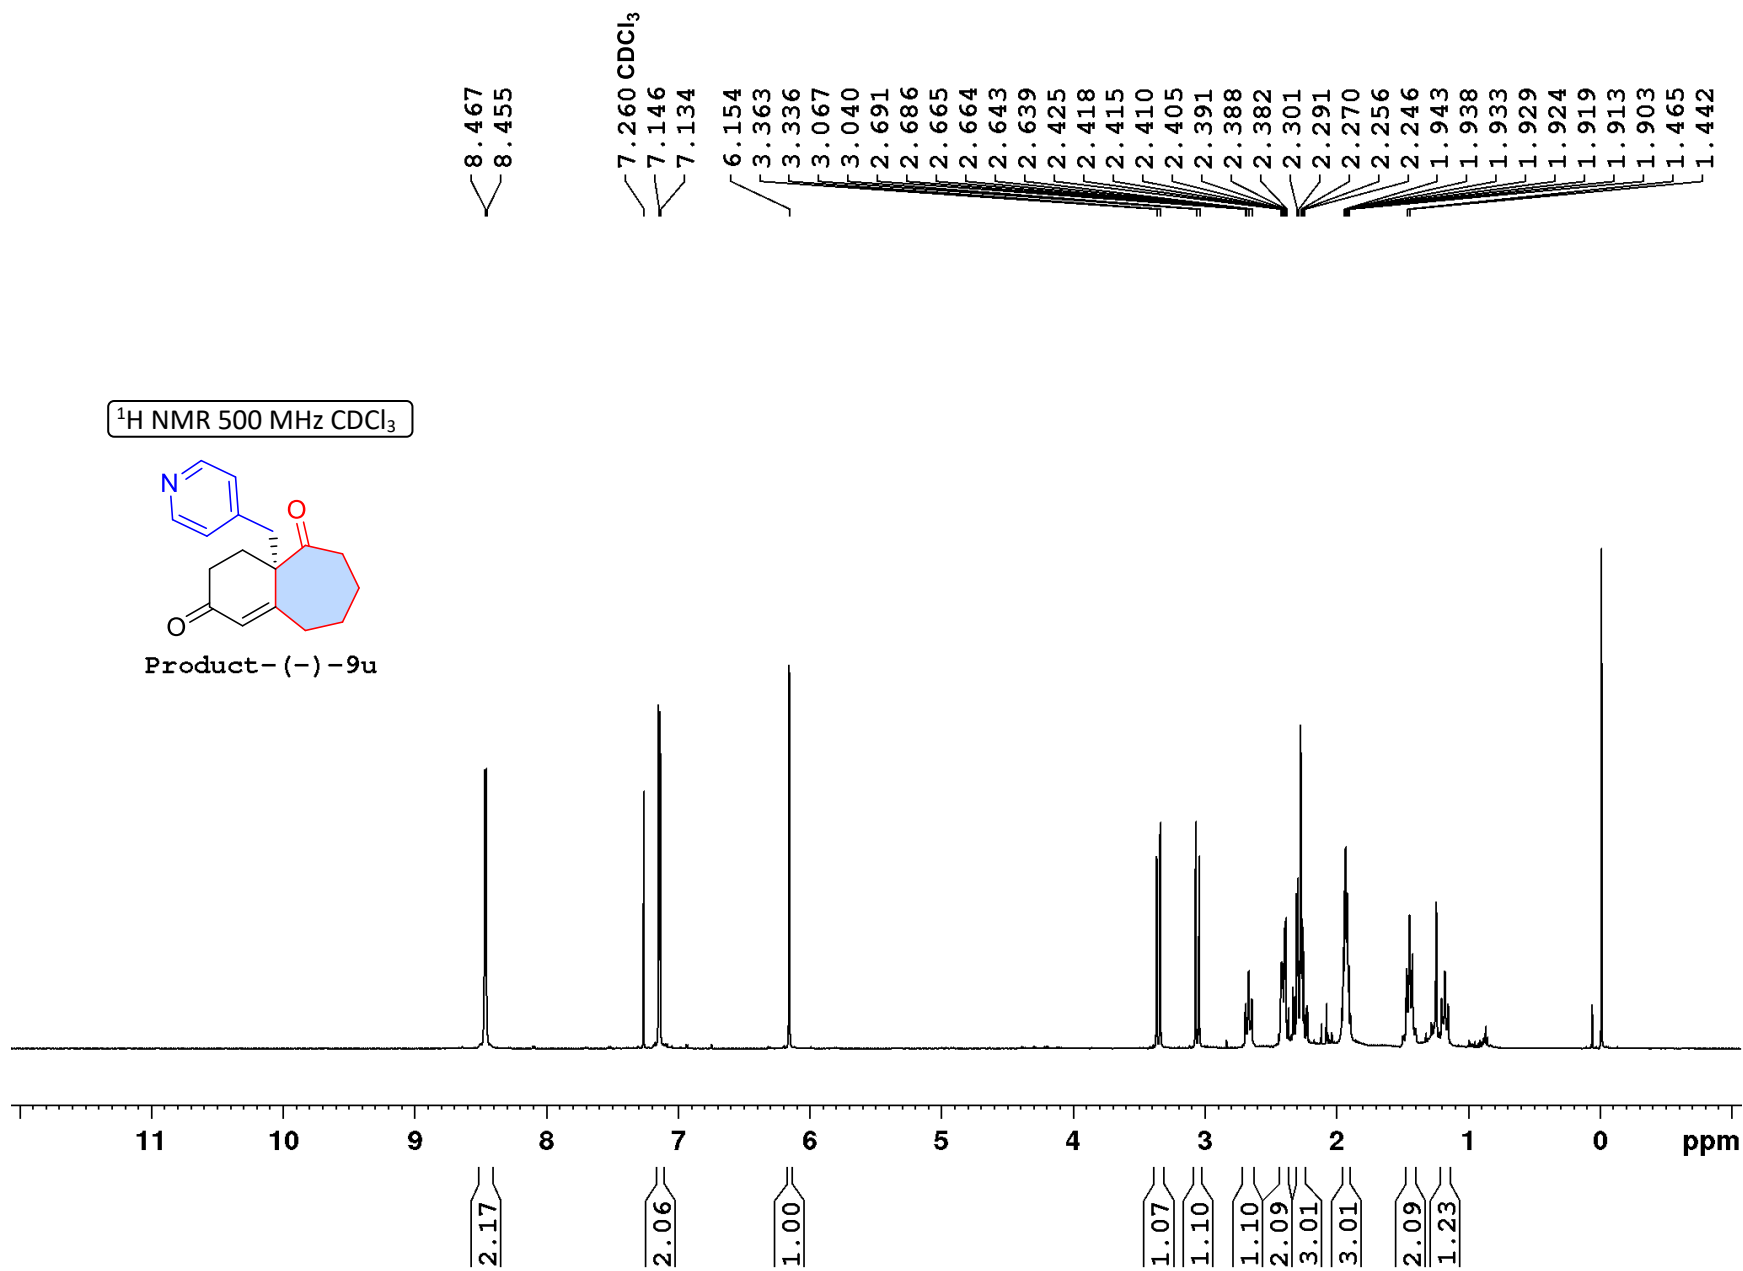

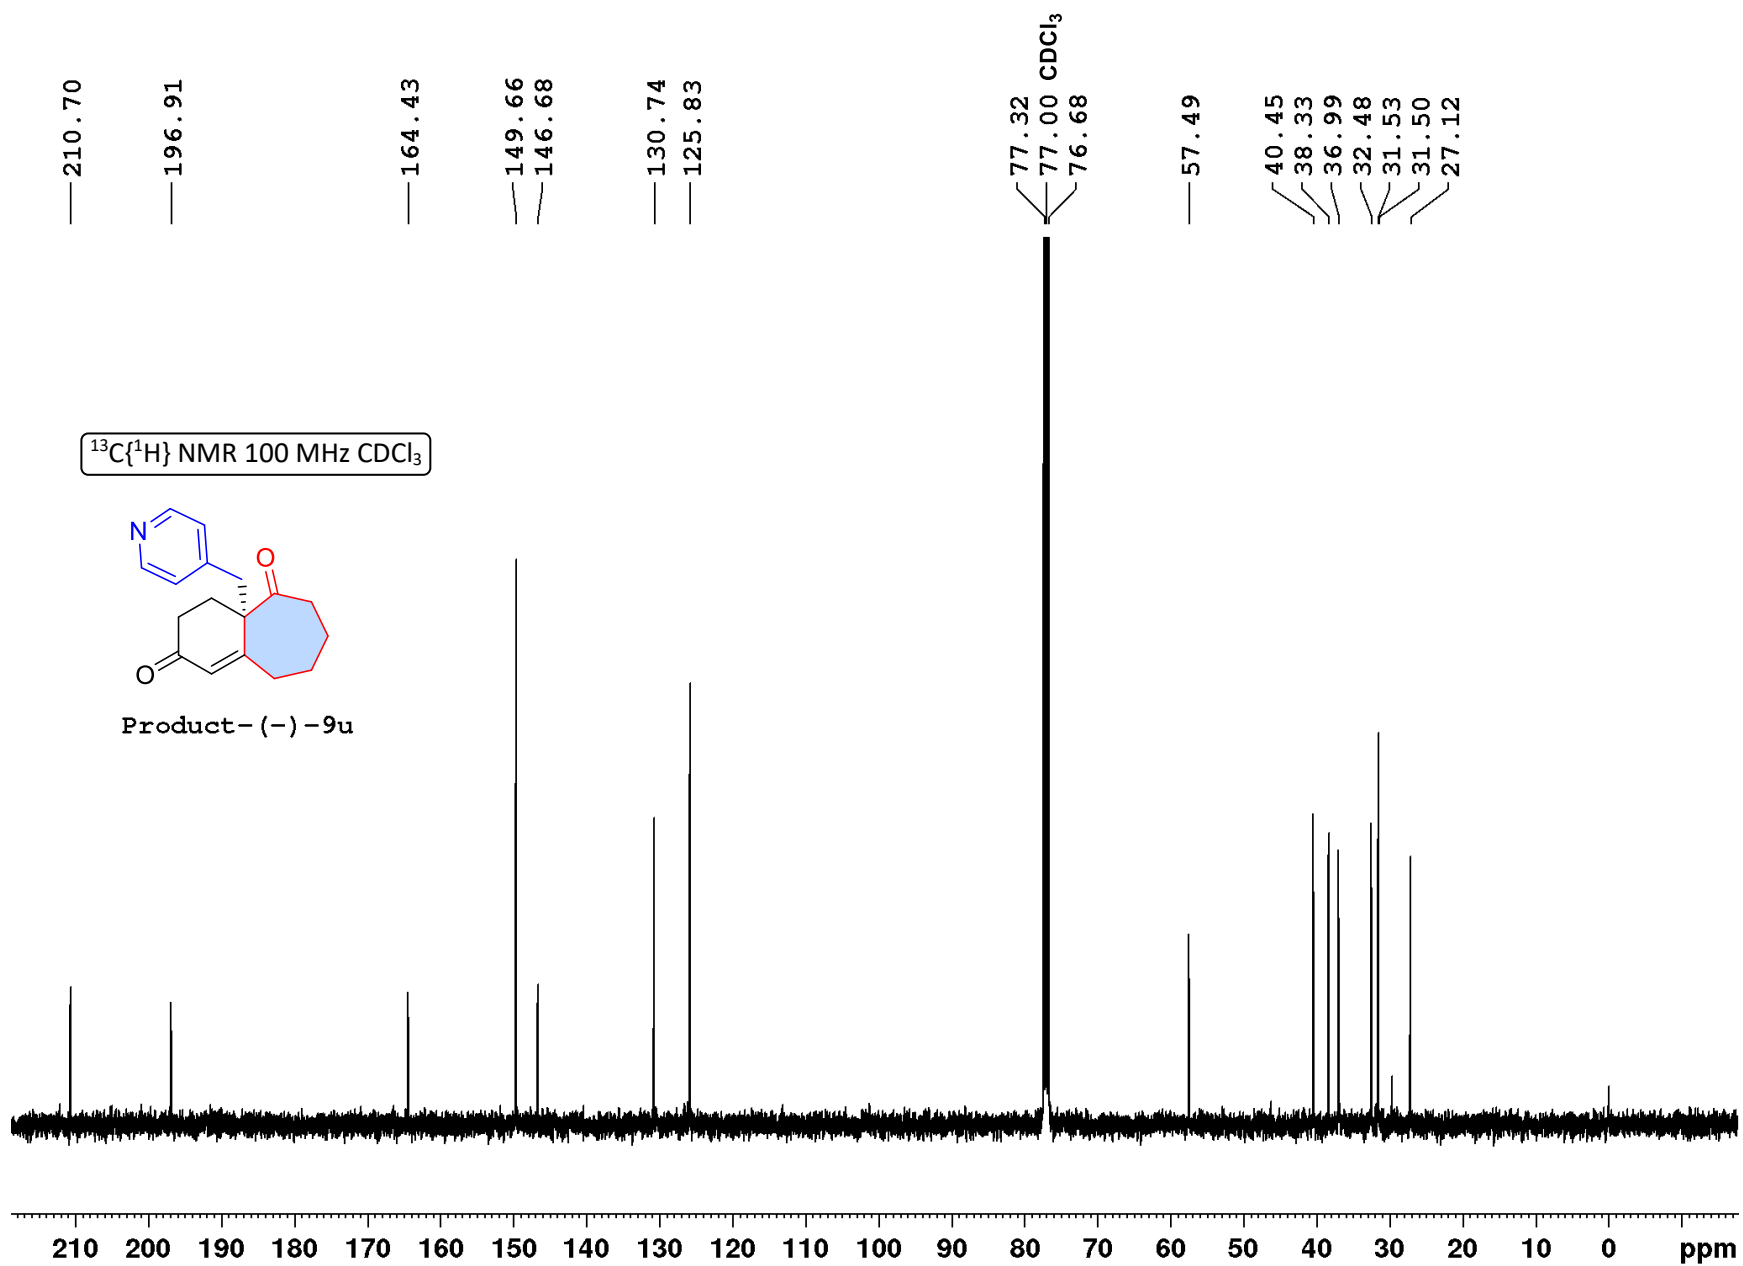

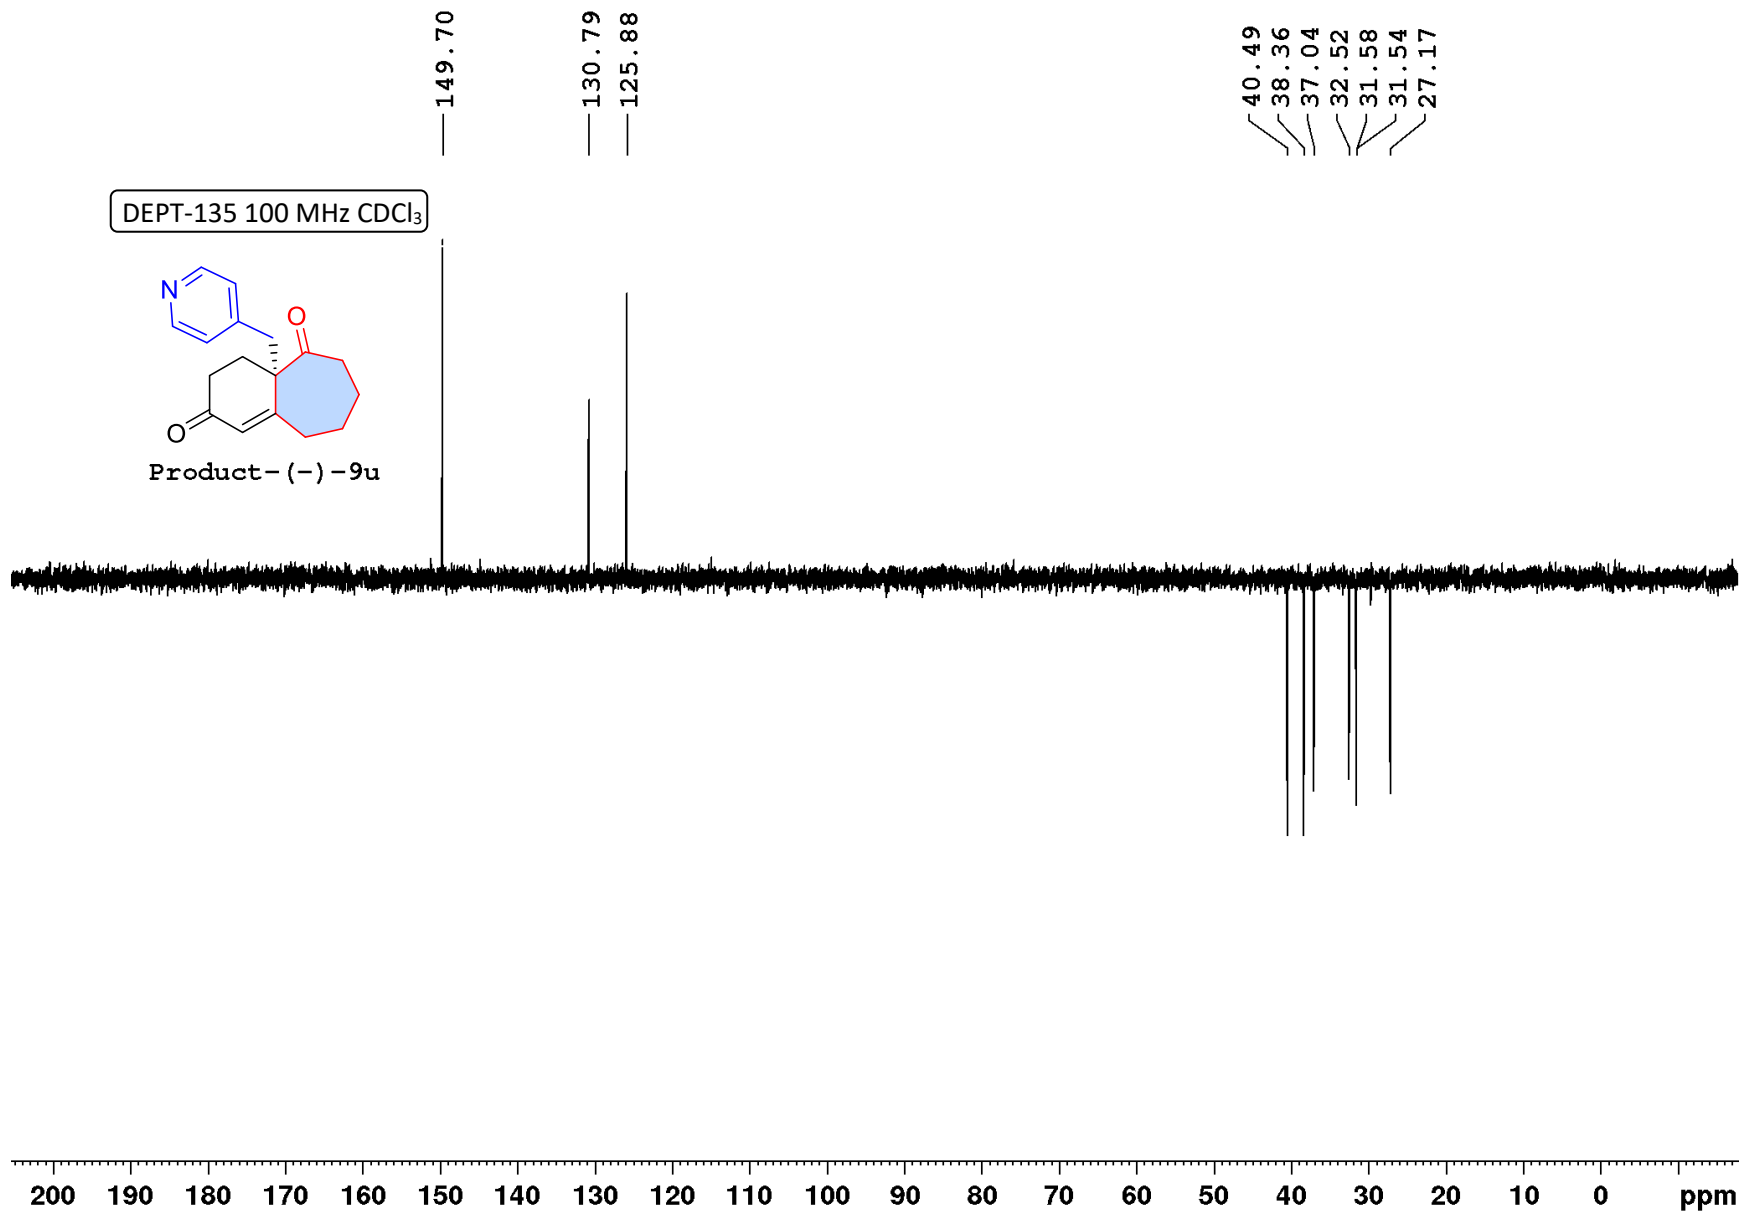

7.789  
7.776  
7.771  
7.761  
7.756  
7.743  
7.711  
7.694  
7.643  
7.454  
7.451  
7.447  
7.441  
7.435  
7.431  
7.428  
7.298  
7.294  
7.281  
7.278  
7.260 CDCl<sub>3</sub>  
6.163  
3.544  
3.517  
3.318  
3.291  
2.689  
2.686  
2.431  
2.417  
2.331  
2.327  
2.309  
2.304  
2.301  
2.283  
2.268  
2.263  
2.242  
2.238  
2.234  
2.220  
2.216  
2.208  
2.013  
2.008  
1.997  
1.994  
1.905  
1.901  
1.898  
1.892  
1.888  
1.599  
1.459  
1.440  
1.302  
1.297

<sup>1</sup>H NMR 500 MHz CDCl<sub>3</sub>

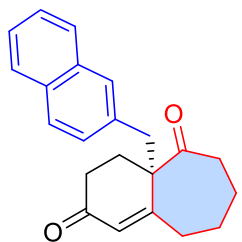

Product-(-)-9x

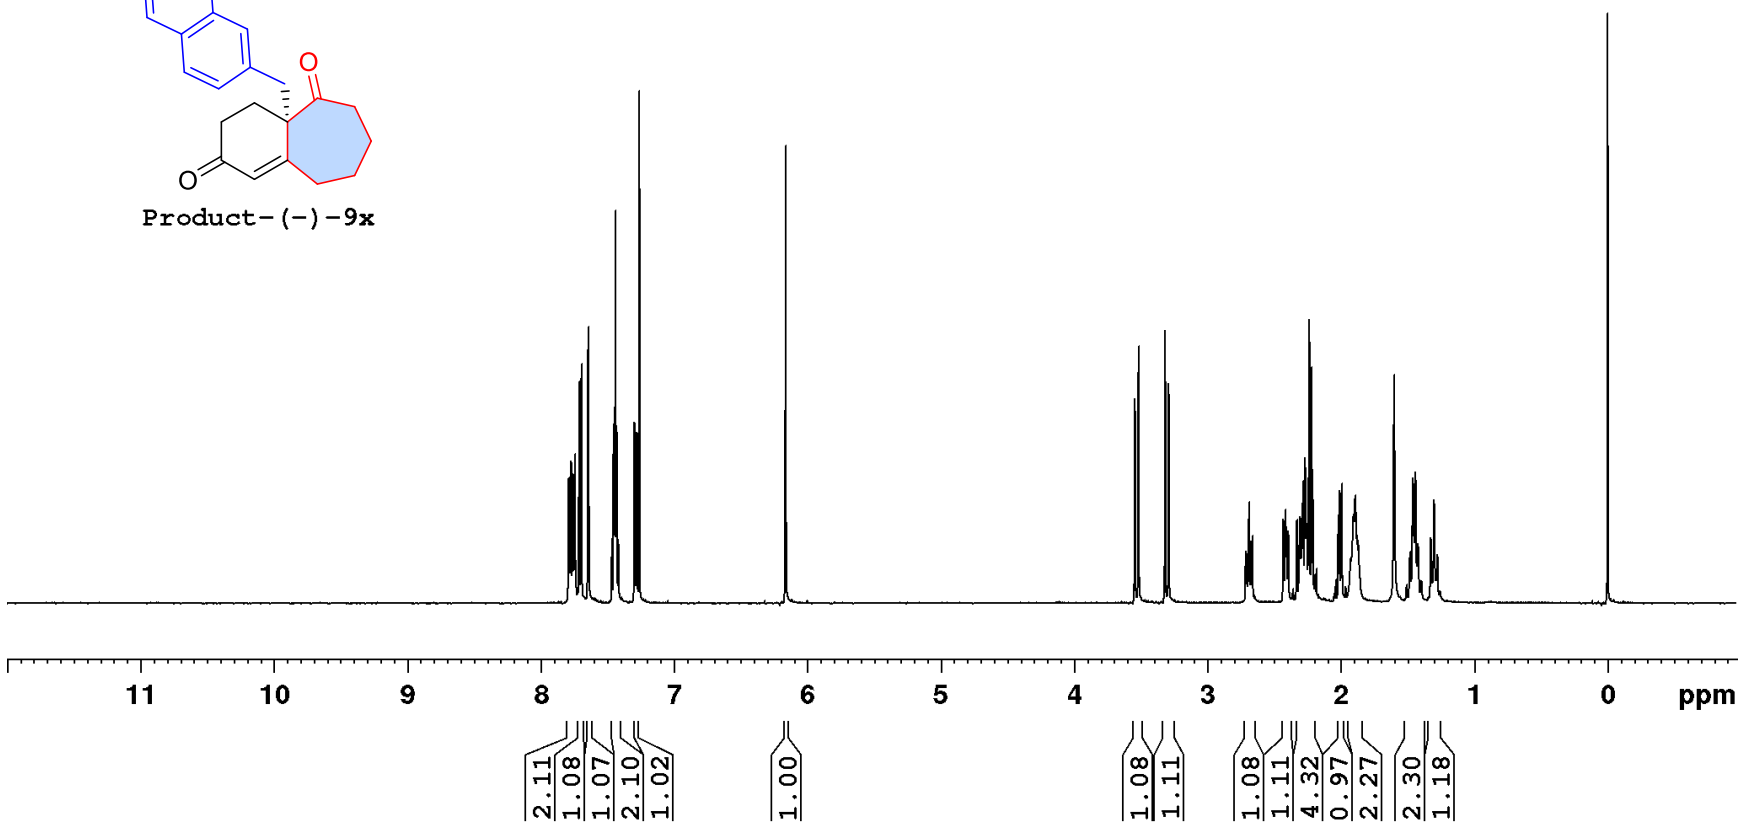

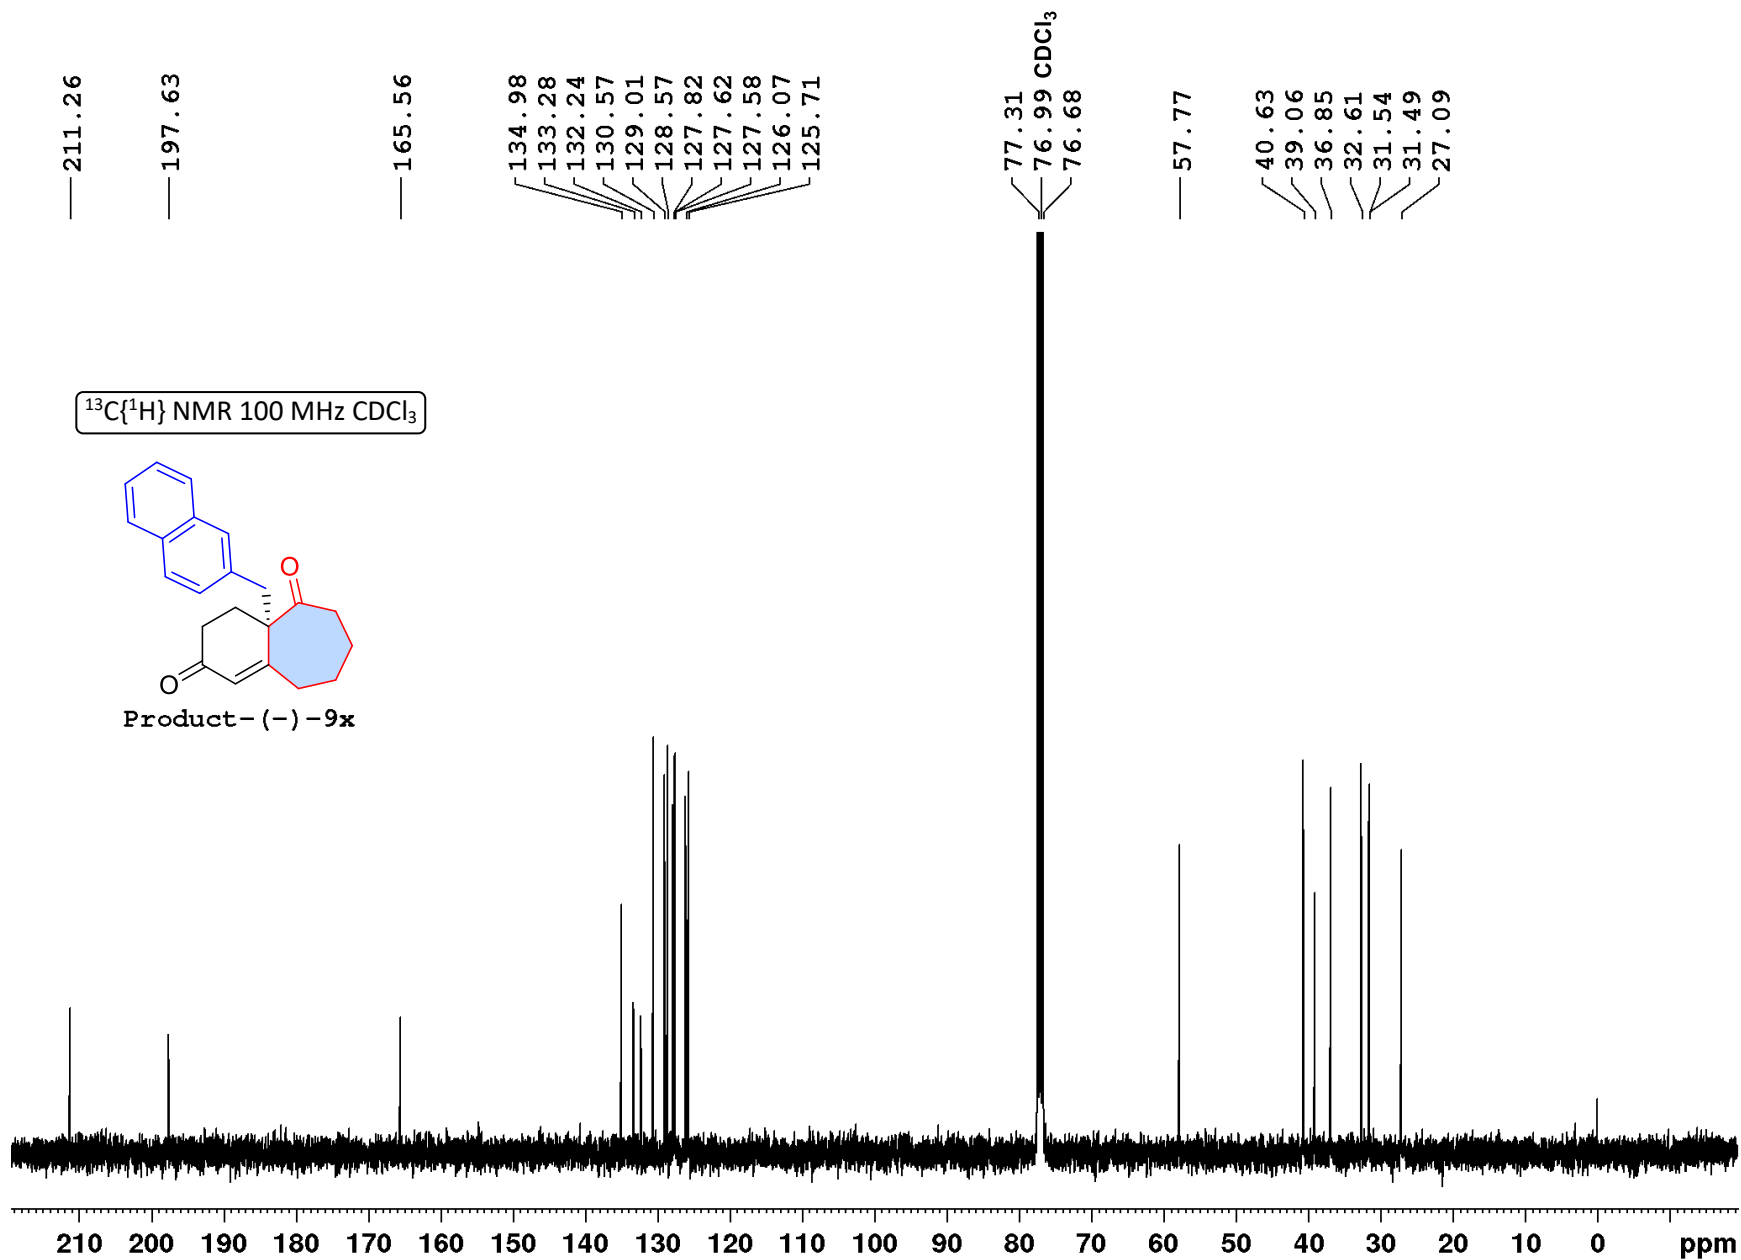

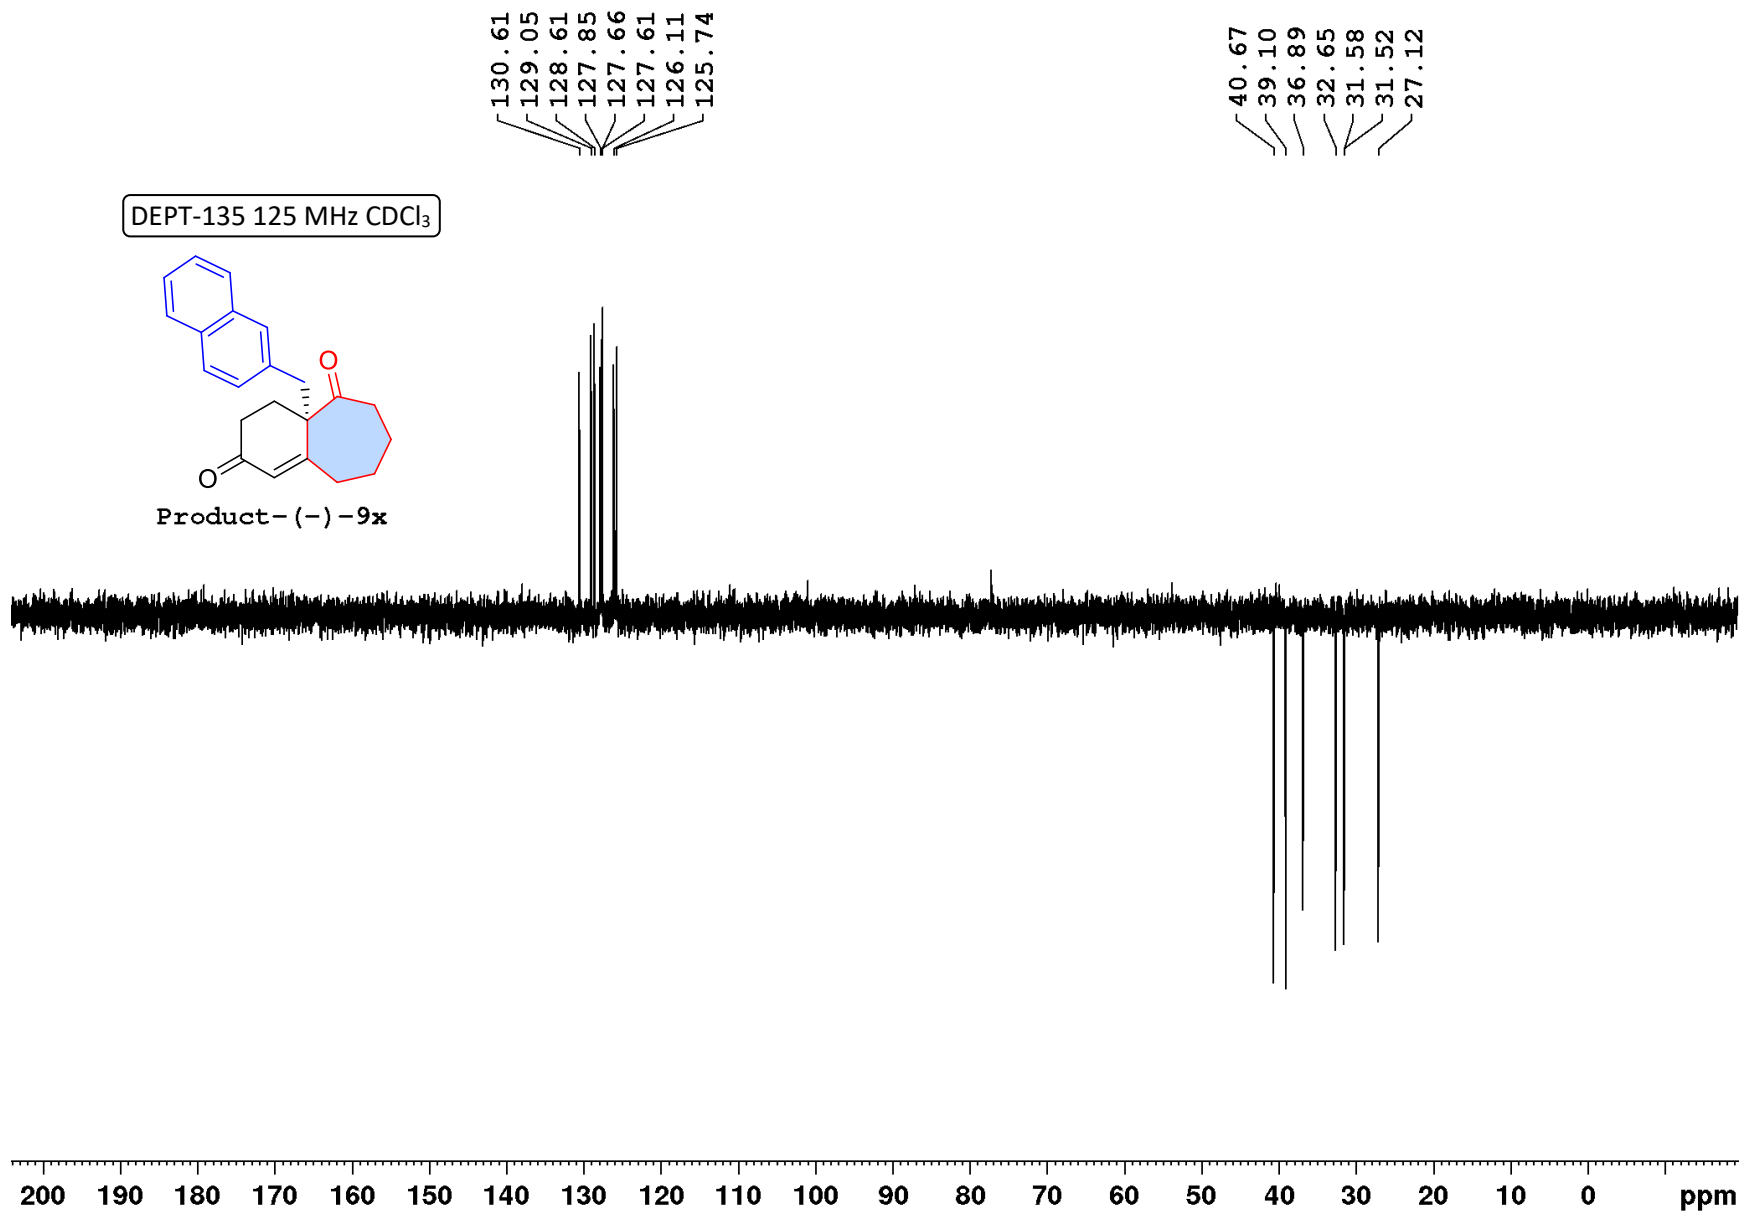

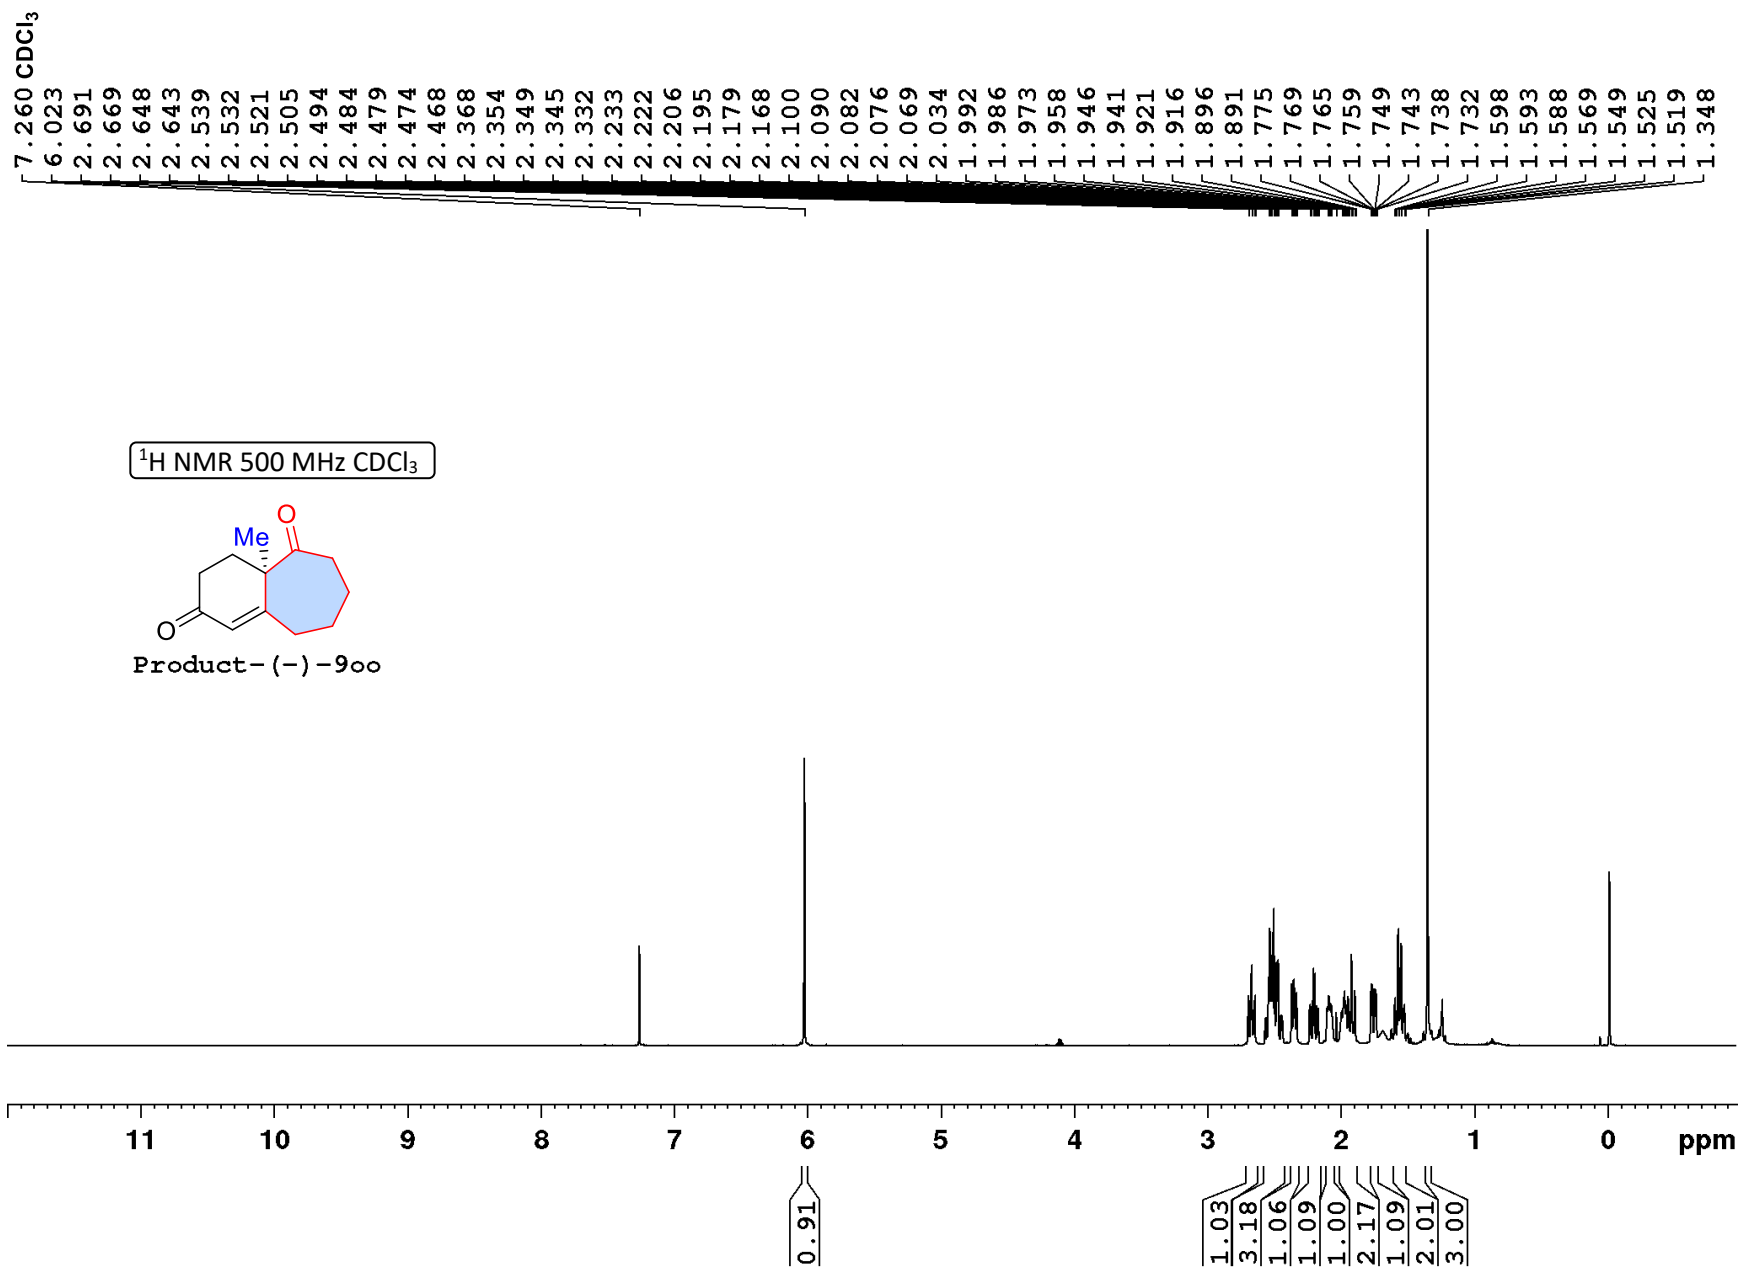



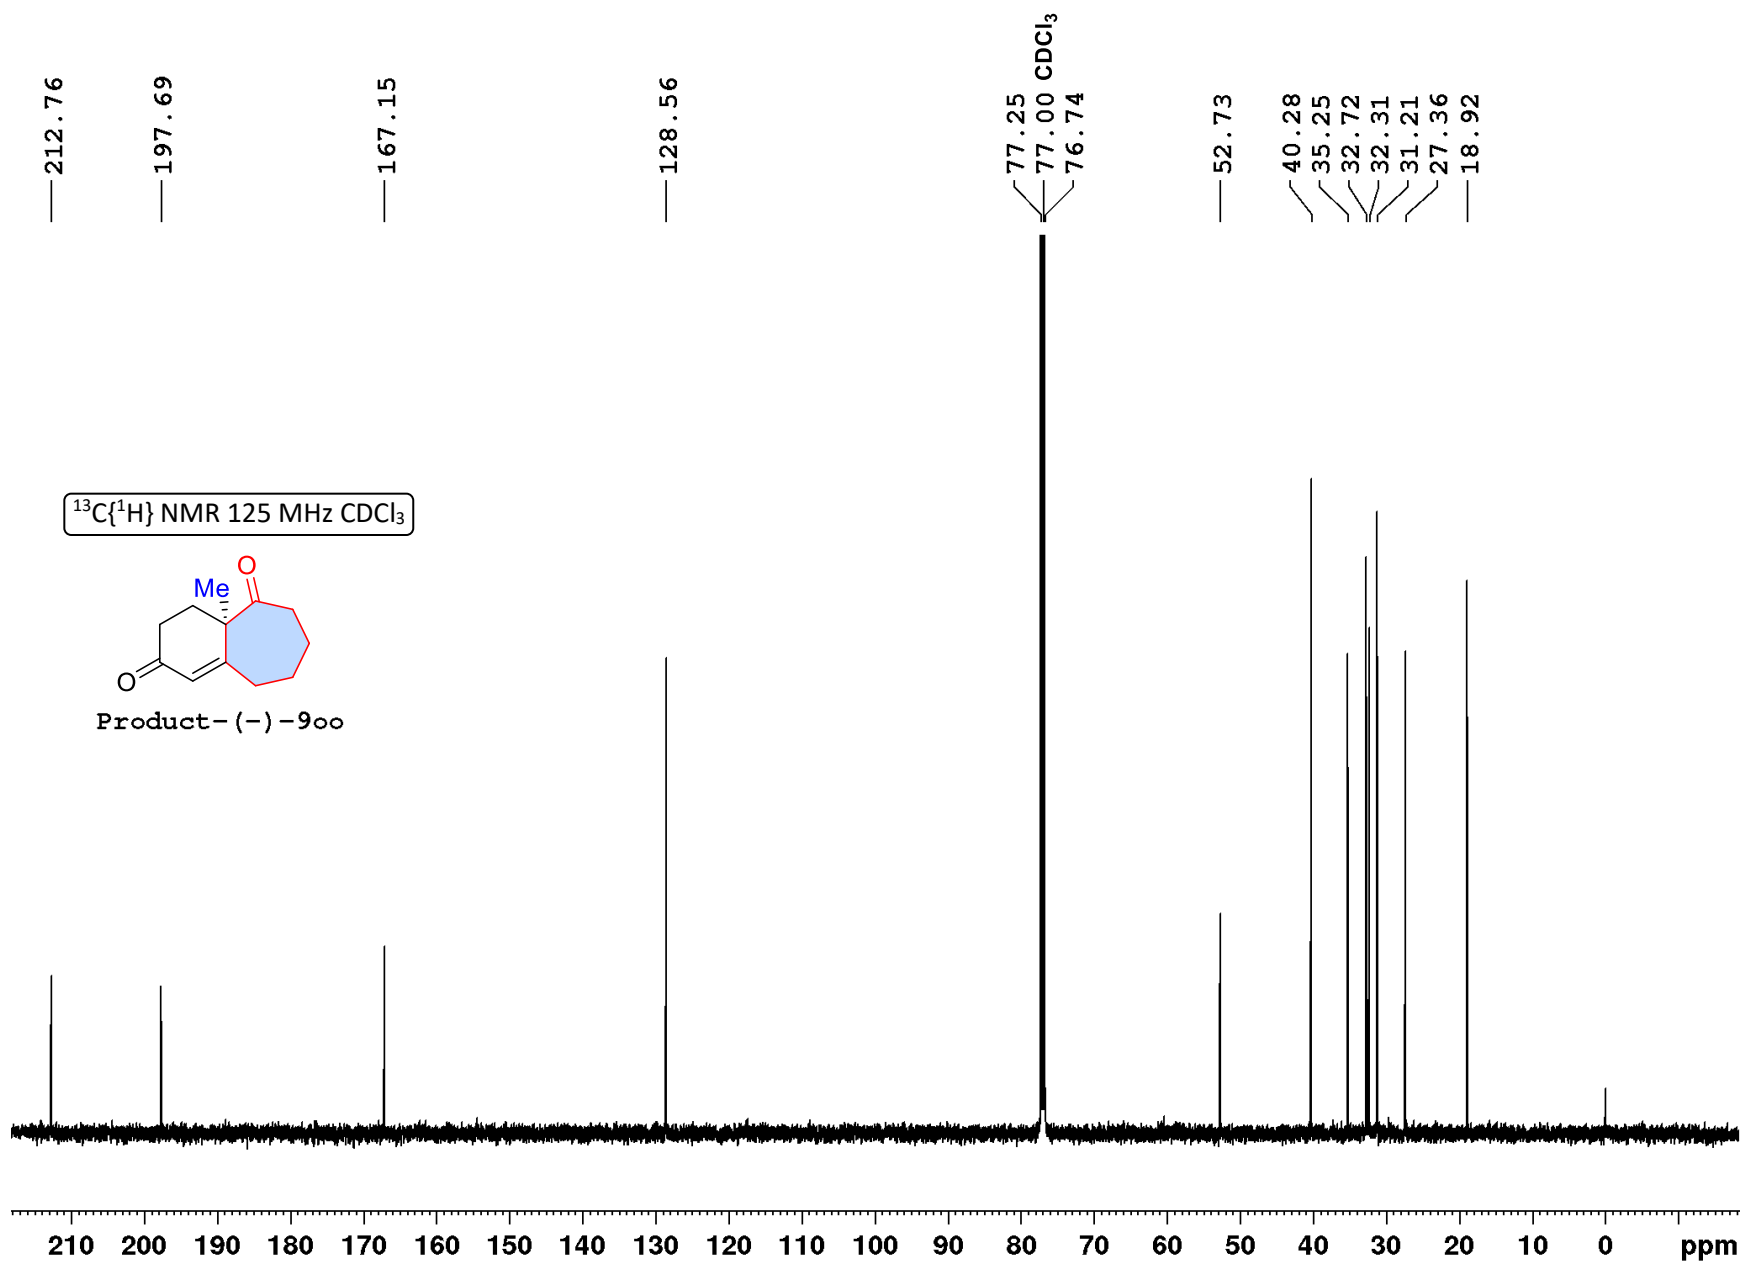

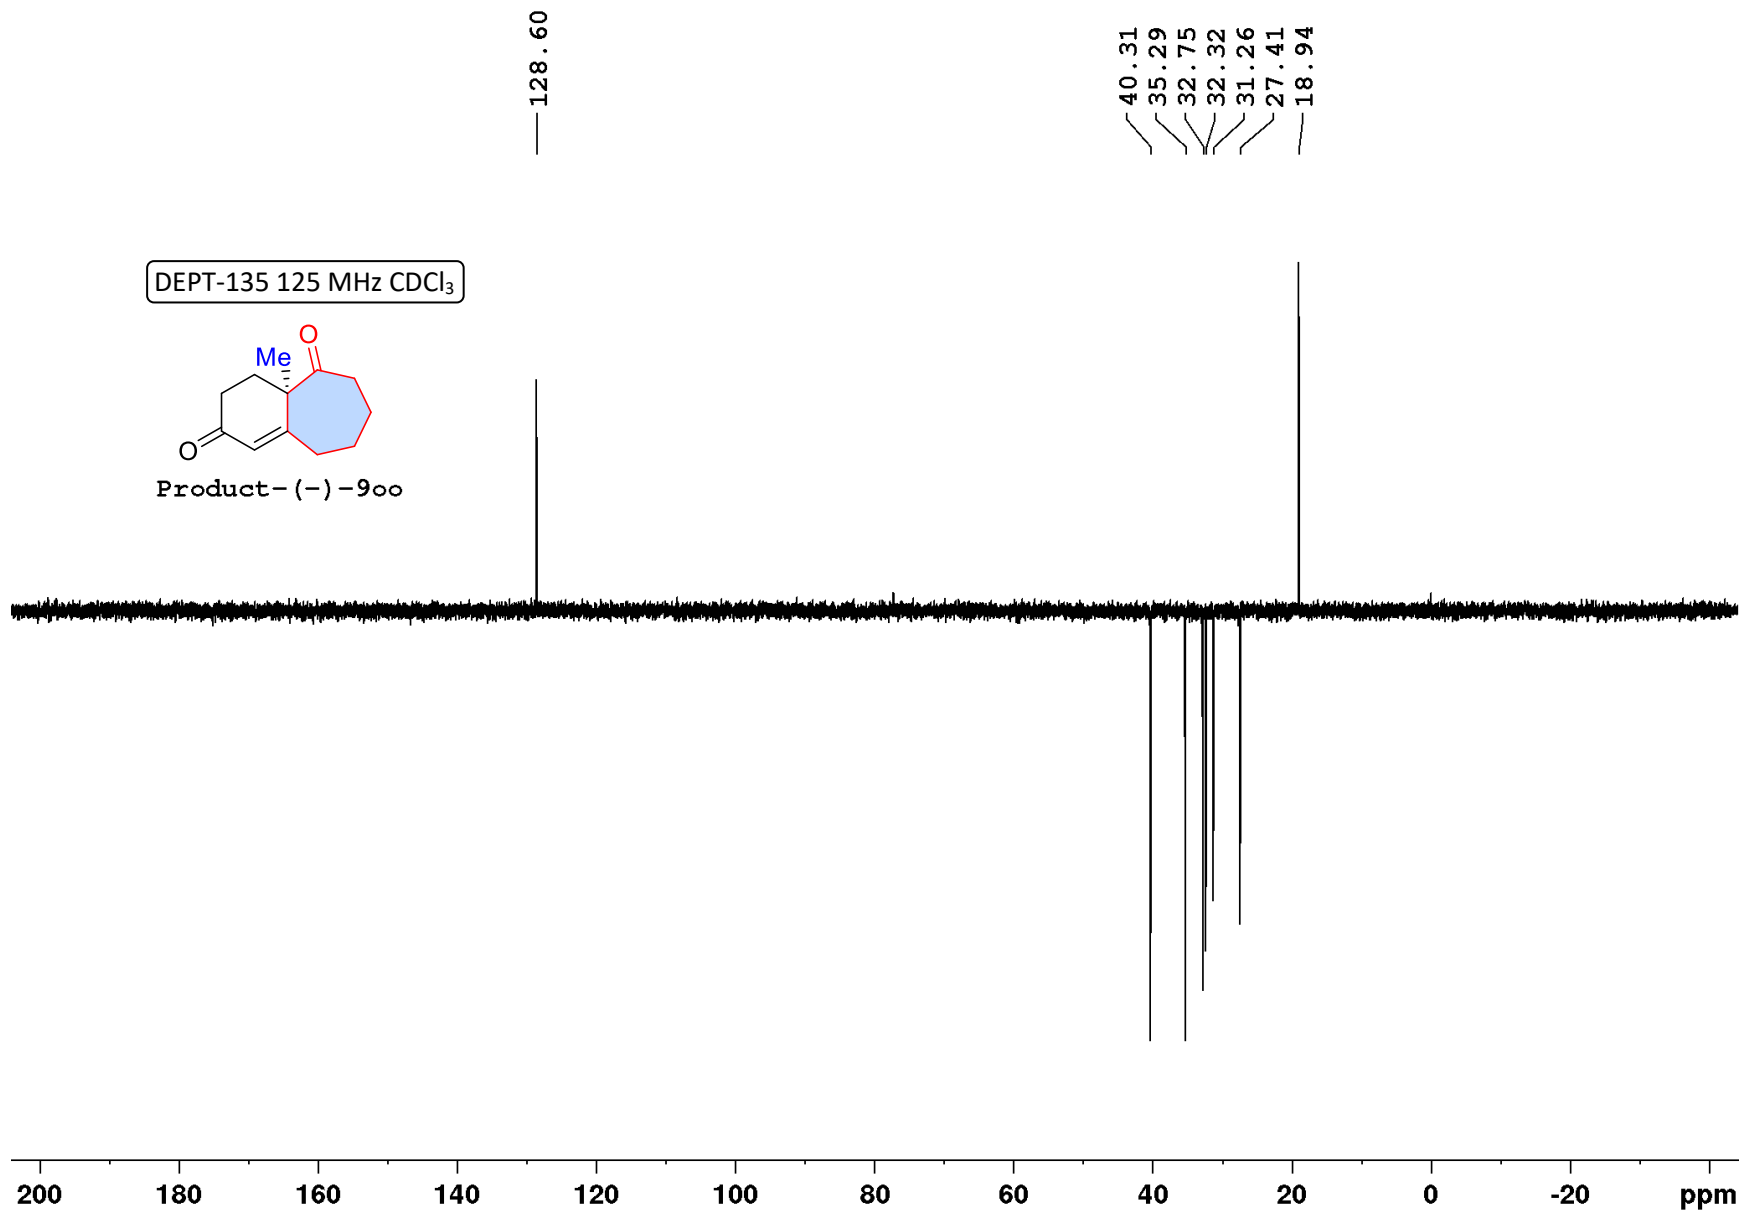

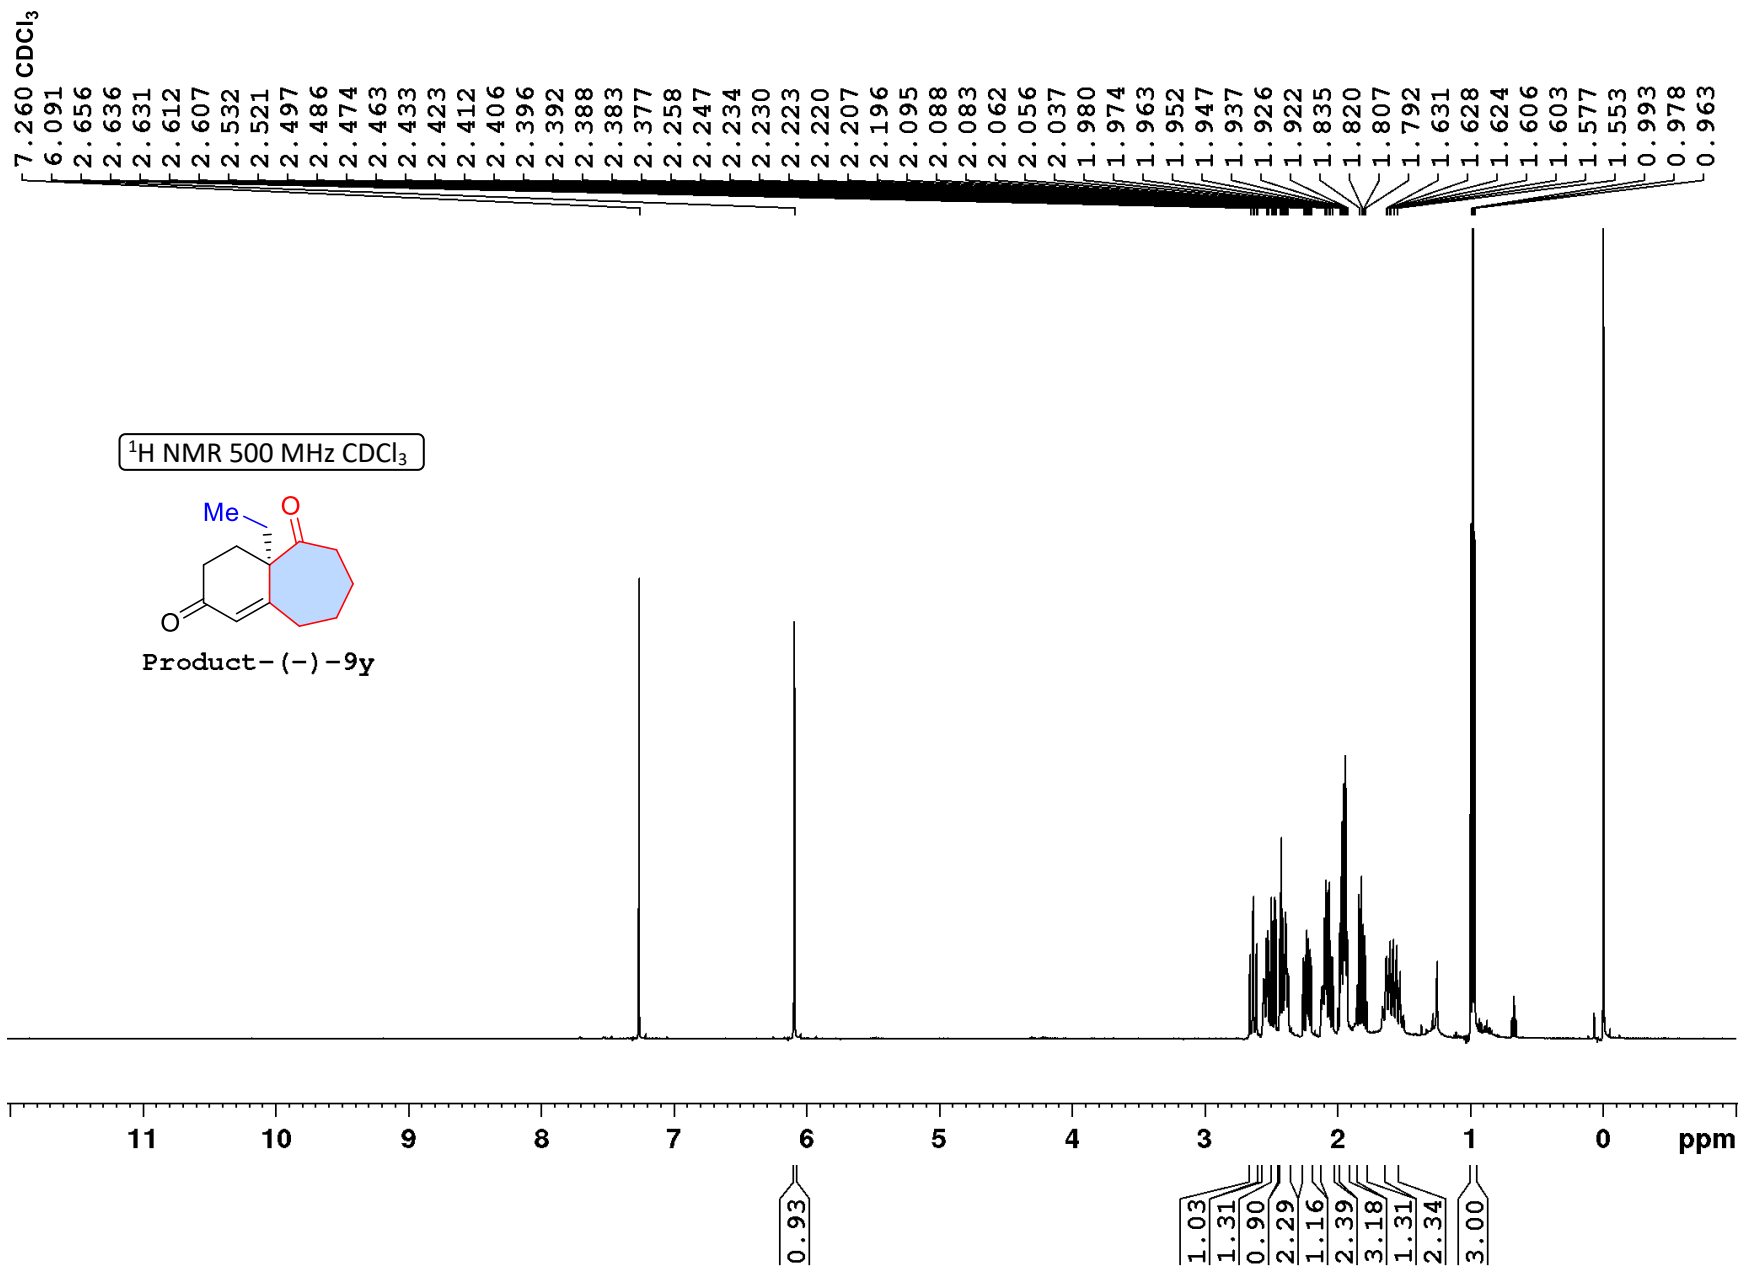

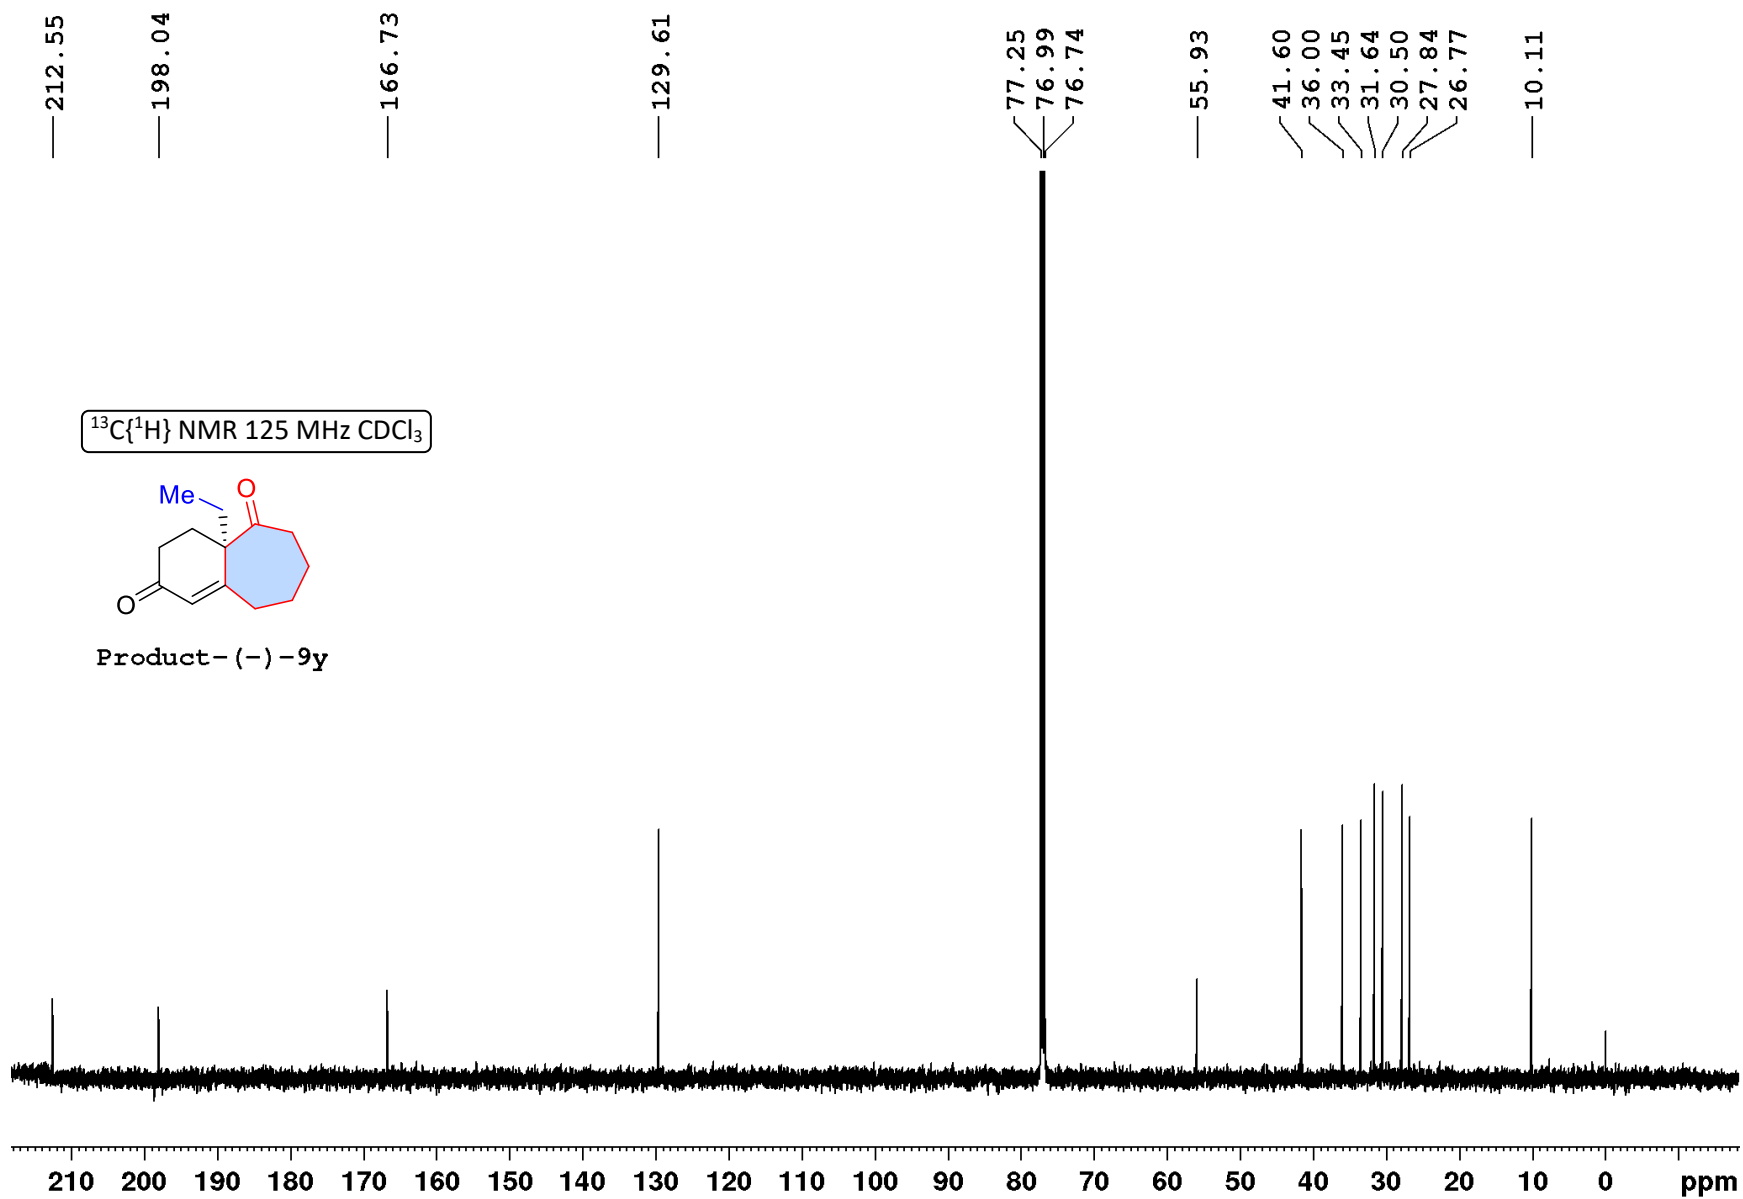

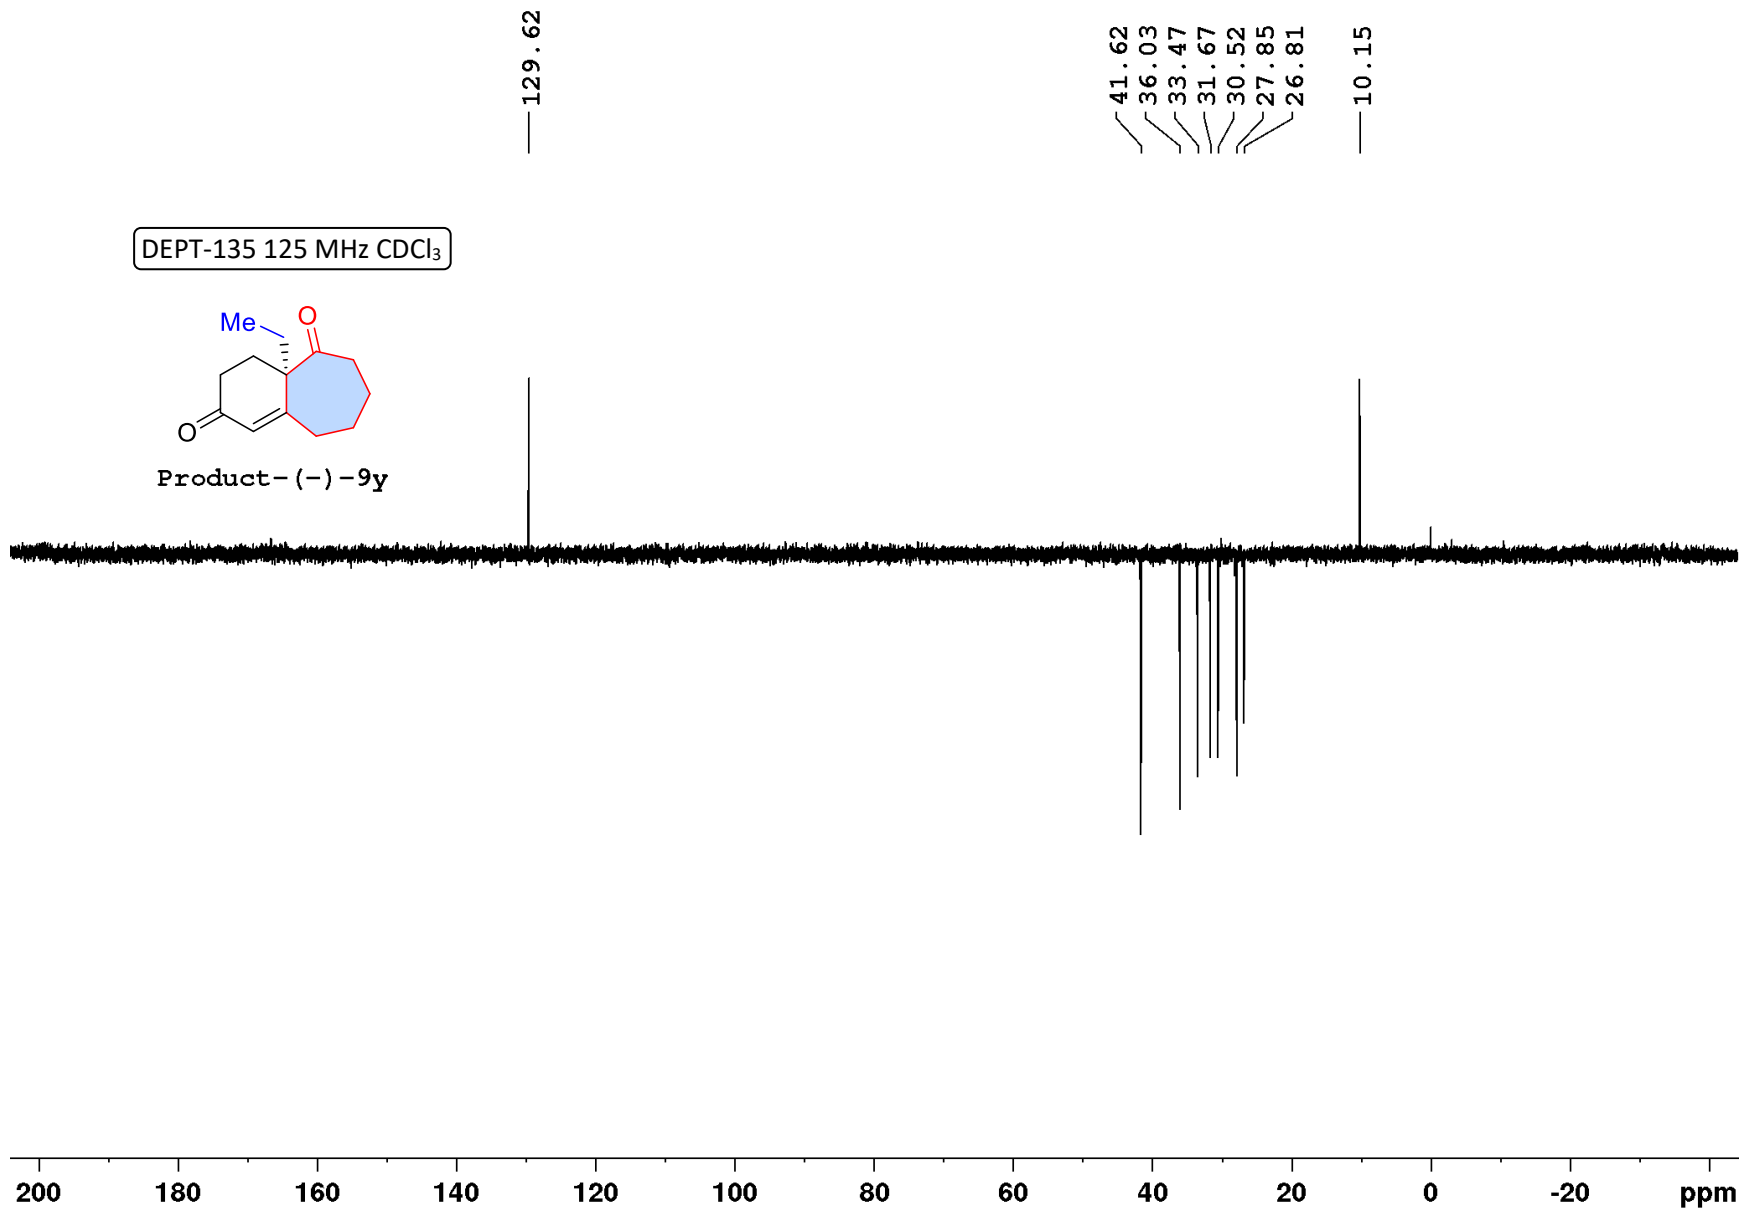

7.260 CDCl<sub>3</sub>

6.066  
2.644  
2.625  
2.620  
2.600  
2.595  
2.528  
2.517  
2.504  
2.493  
2.482  
2.469  
2.458  
2.420  
2.410  
2.399  
2.390  
2.374  
2.364  
2.219  
2.208  
2.196  
2.068  
2.047  
2.041  
2.022  
1.952  
1.941  
1.931  
1.925  
1.914  
1.860  
1.854  
1.851  
1.836  
1.827  
1.745  
1.720  
1.717  
1.692  
1.592  
1.565  
1.541  
1.365  
1.338  
1.330  
1.324  
1.317  
1.312  
1.309  
1.303  
1.300  
1.298  
1.286  
0.908  
0.893  
0.879

<sup>1</sup>H NMR 500 MHz CDCl<sub>3</sub>

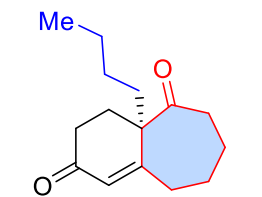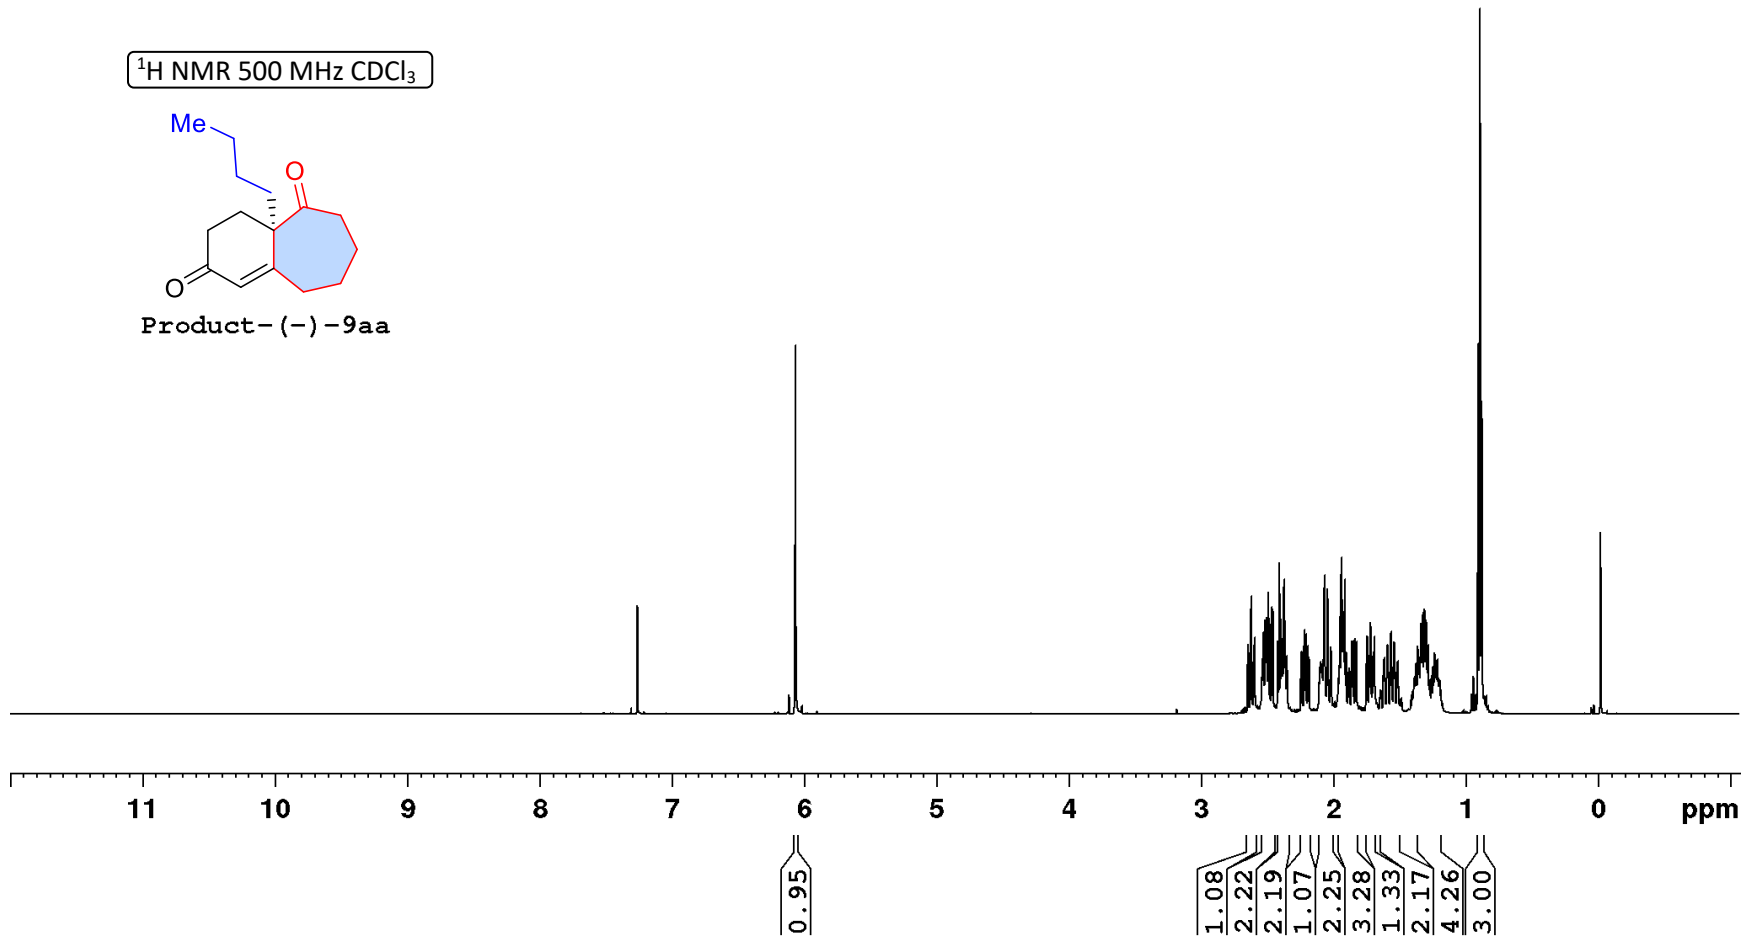

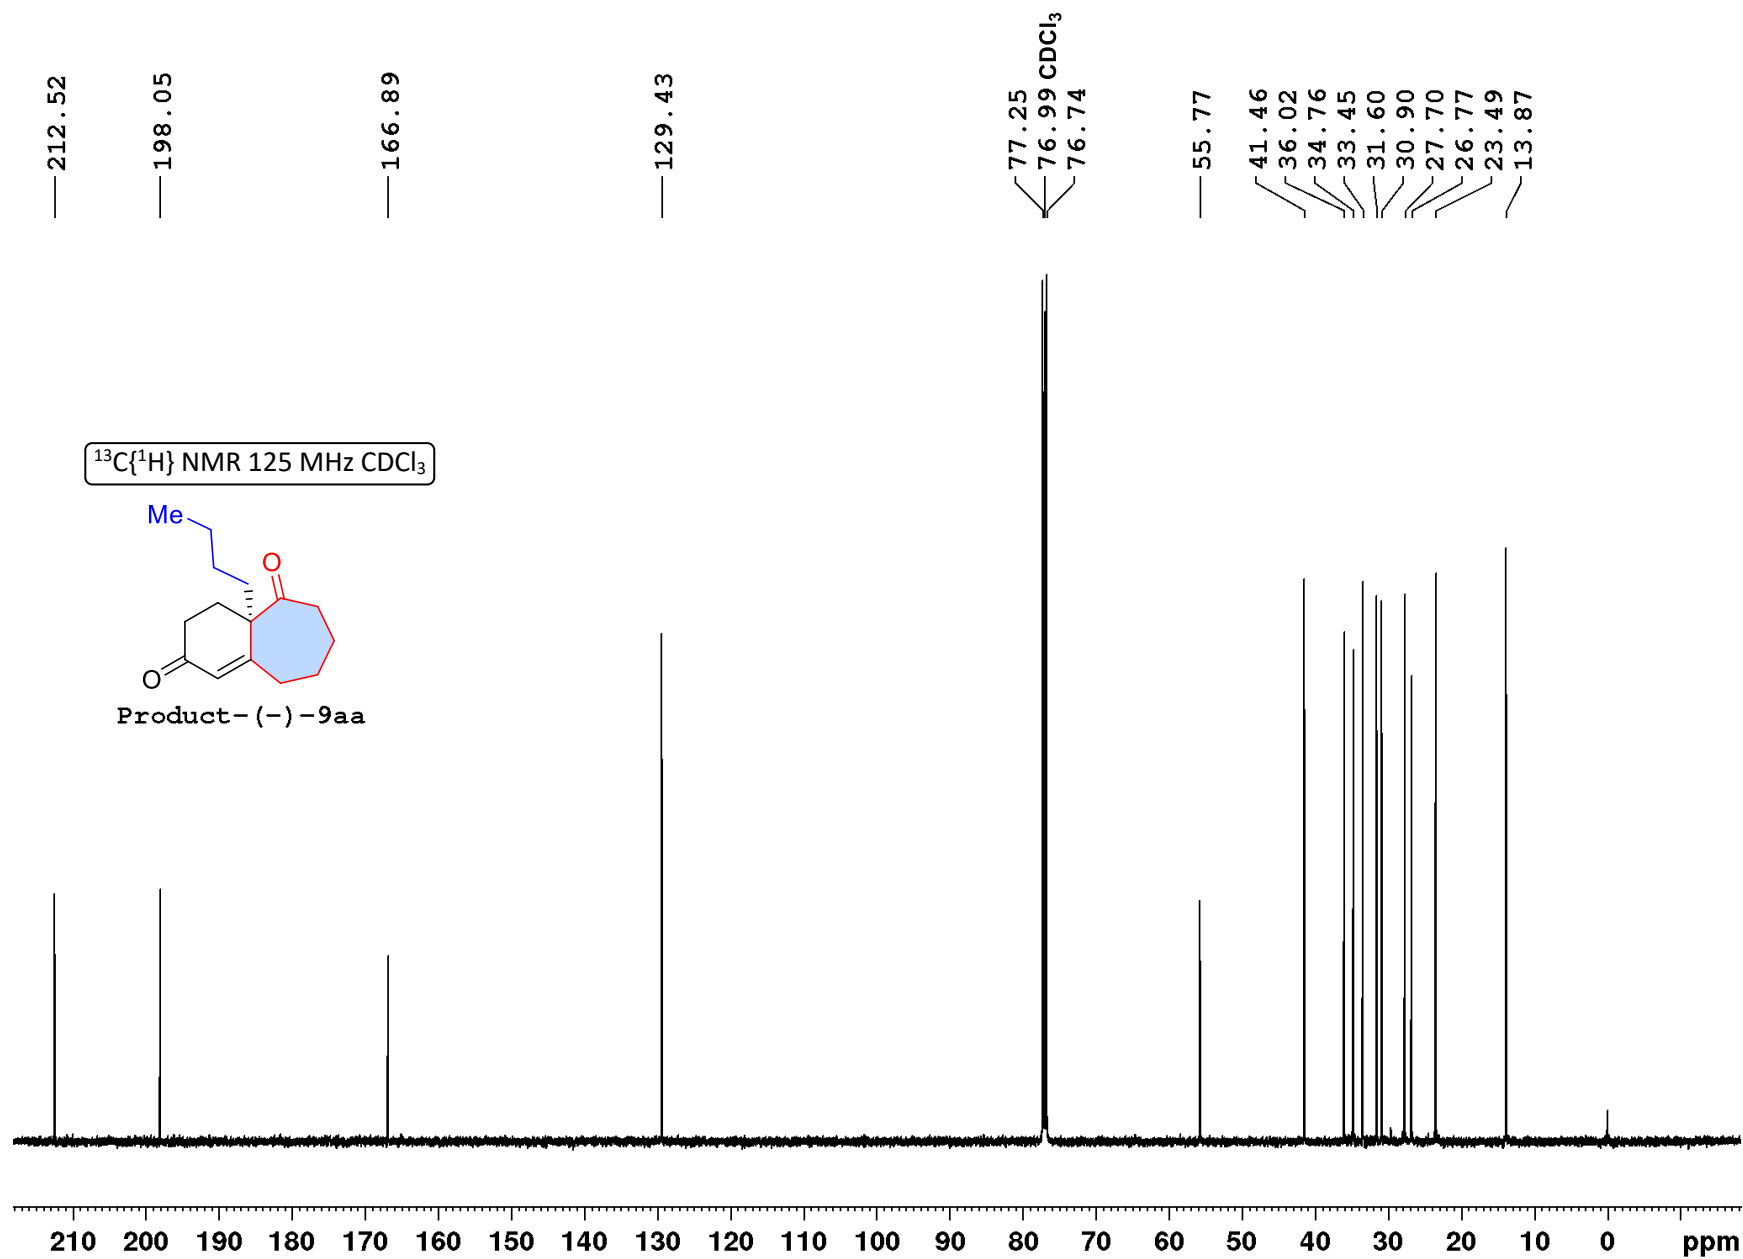

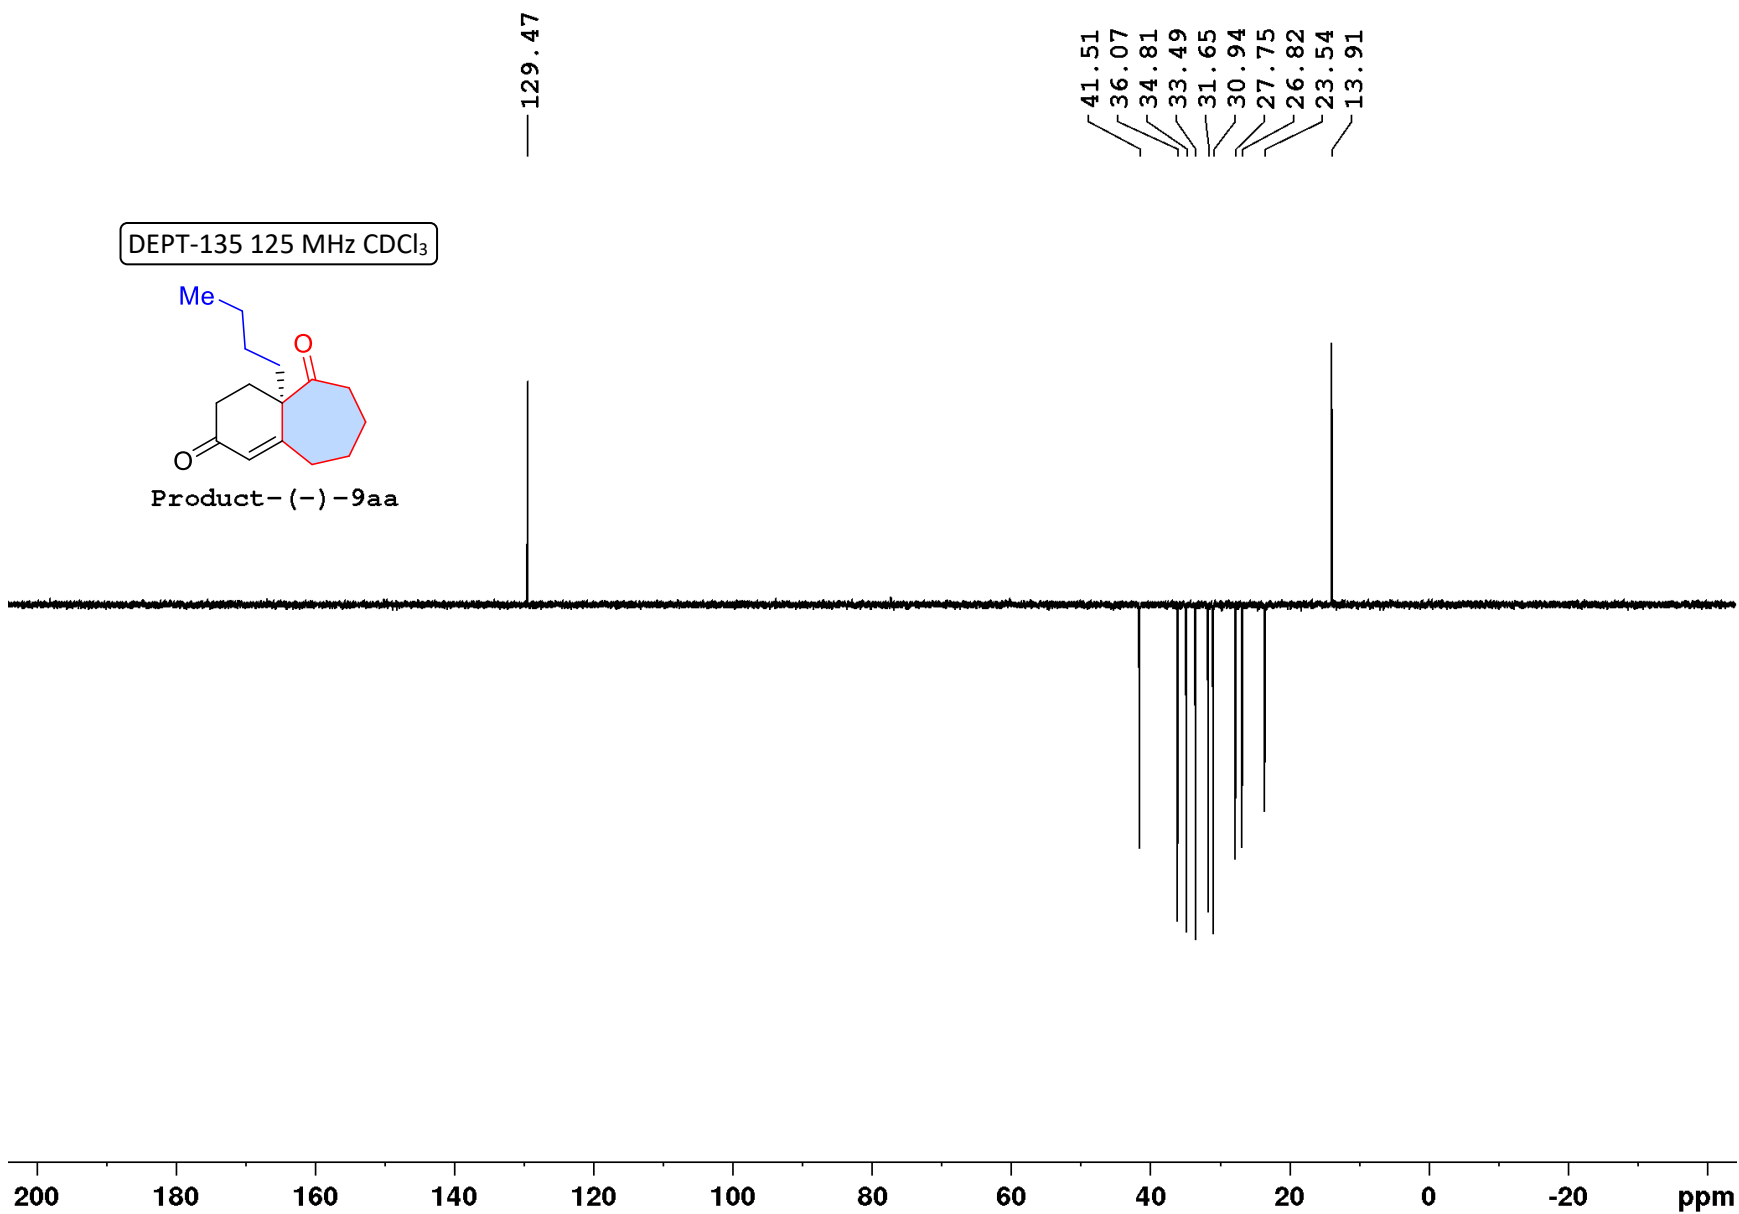



7.260 CDCl<sub>3</sub>

6.089  
2.651  
2.631  
2.627  
2.607  
2.602  
2.567  
2.556  
2.543  
2.532  
2.521  
2.507  
2.497  
2.438  
2.428  
2.418  
2.393  
2.382  
2.381  
2.379  
2.246  
2.236  
2.222  
2.219  
2.211  
2.208  
2.195  
2.184  
2.119  
2.104  
2.097  
2.094  
2.082  
2.074  
2.068  
1.931  
1.921  
1.911  
1.904  
1.894  
1.884  
1.806  
1.789  
1.783  
1.774  
1.758  
1.753  
1.746  
1.742  
1.735  
1.732  
1.722  
1.603  
1.544  
0.932  
0.920  
0.908

<sup>1</sup>H NMR 500 MHz CDCl<sub>3</sub>

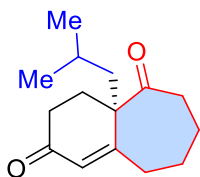

Product-(-)-9dd

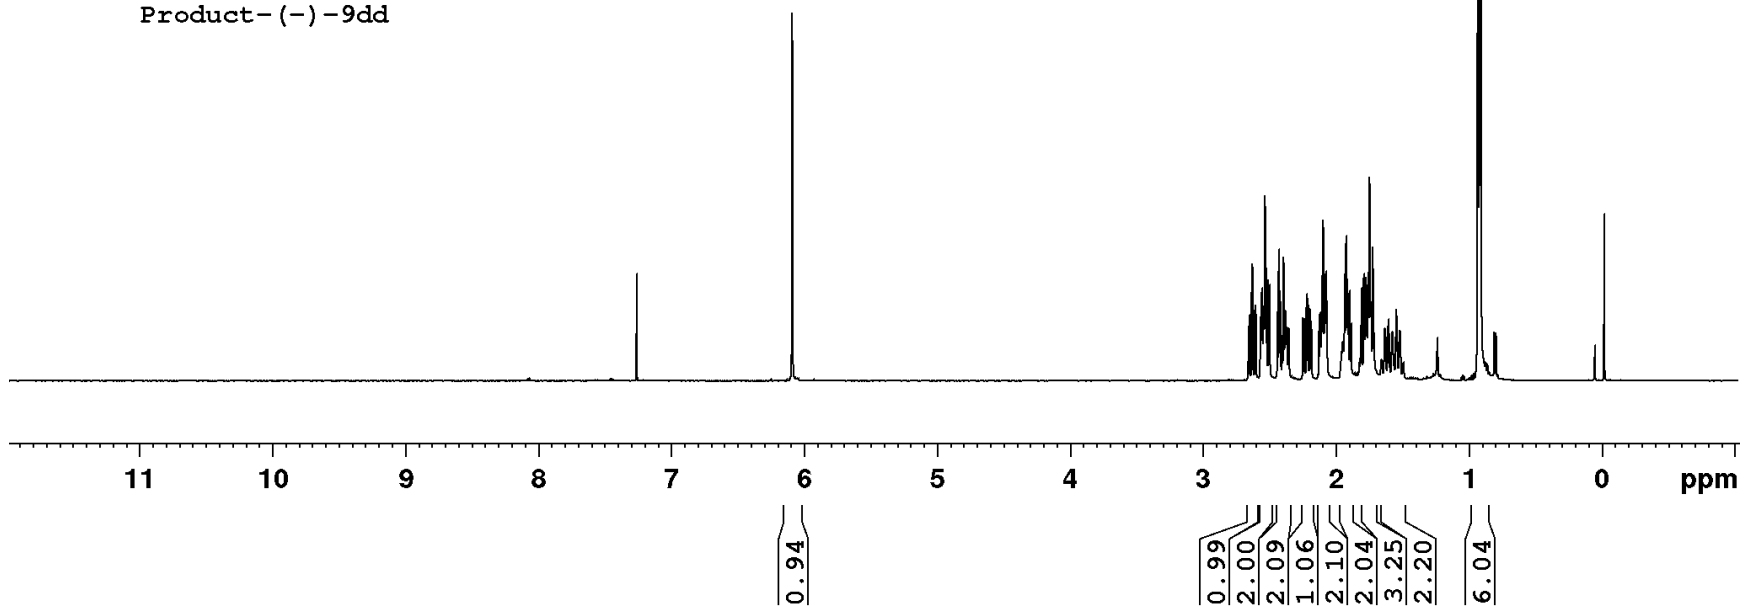

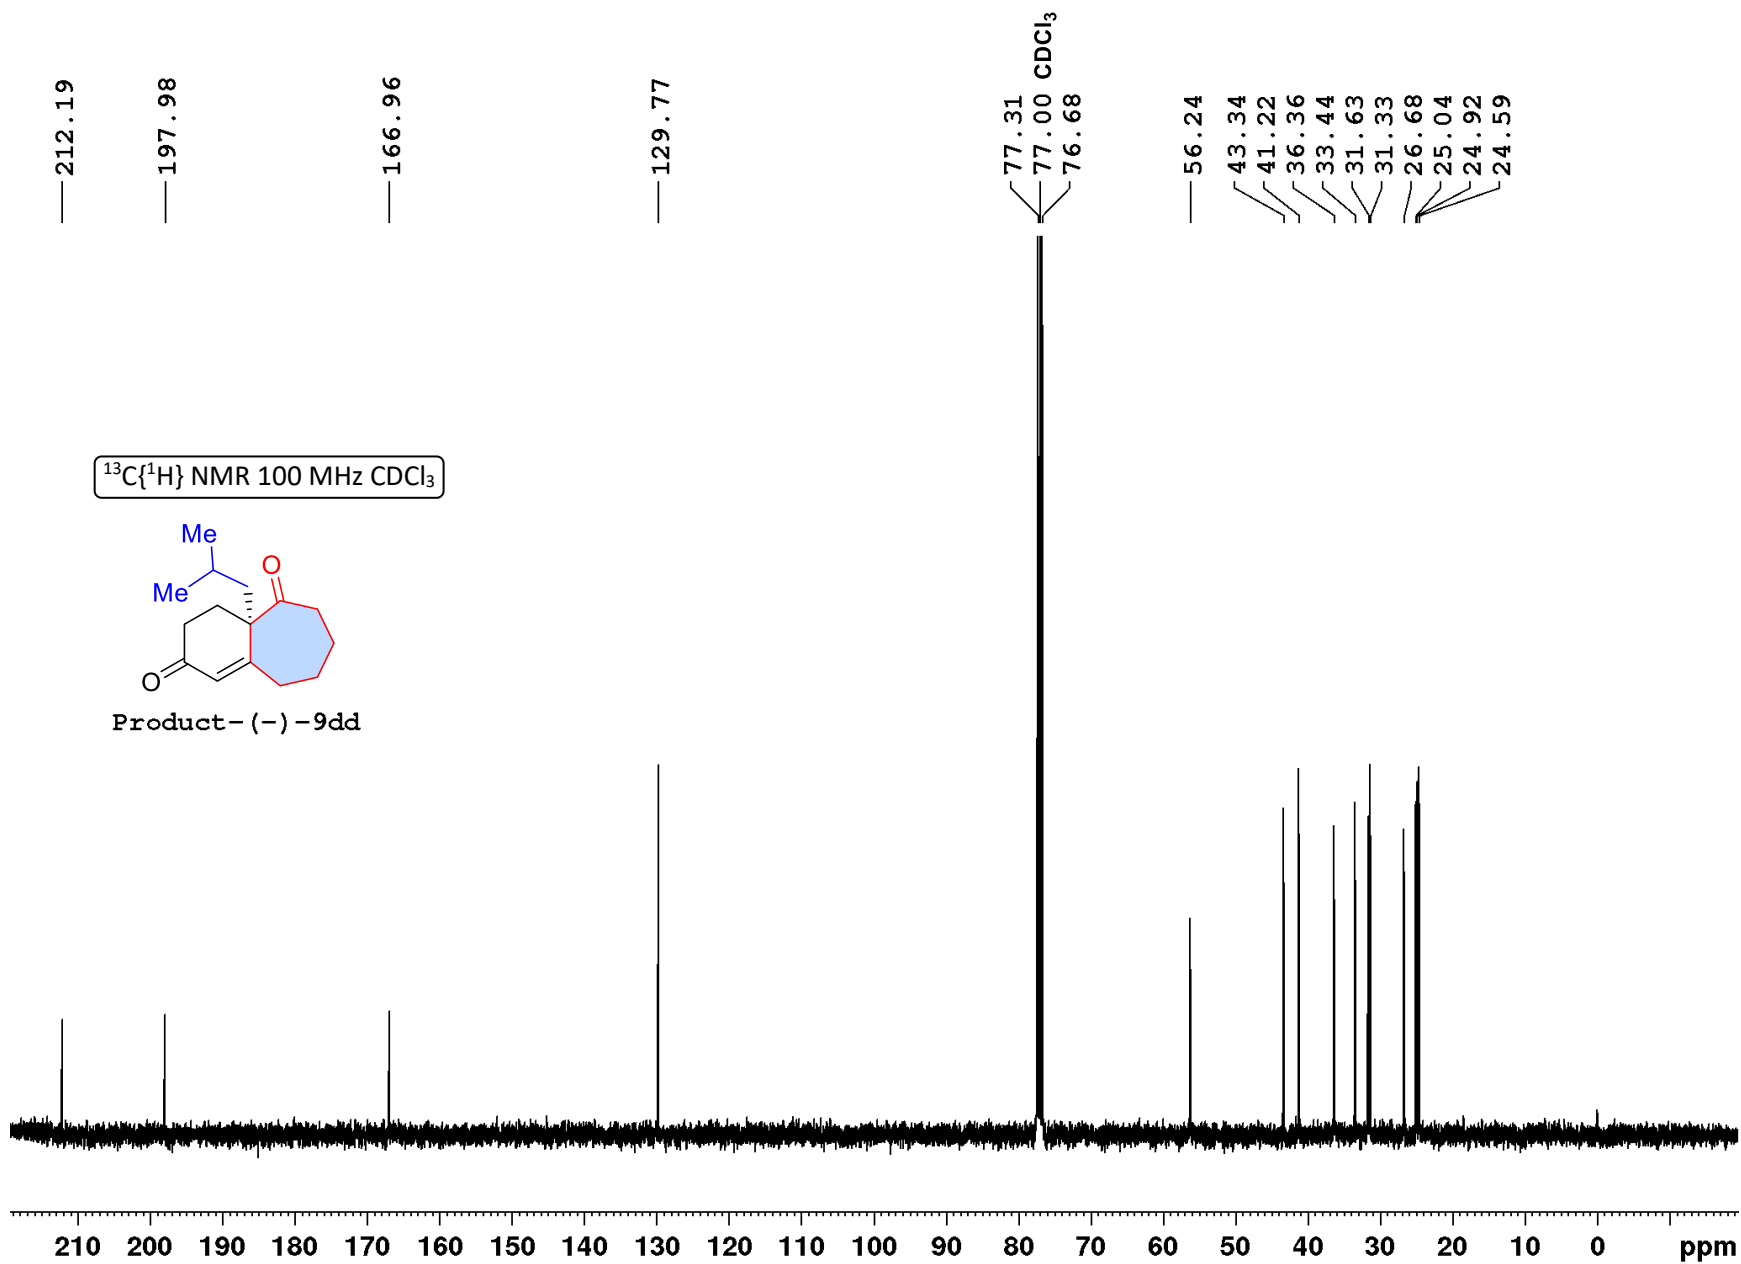

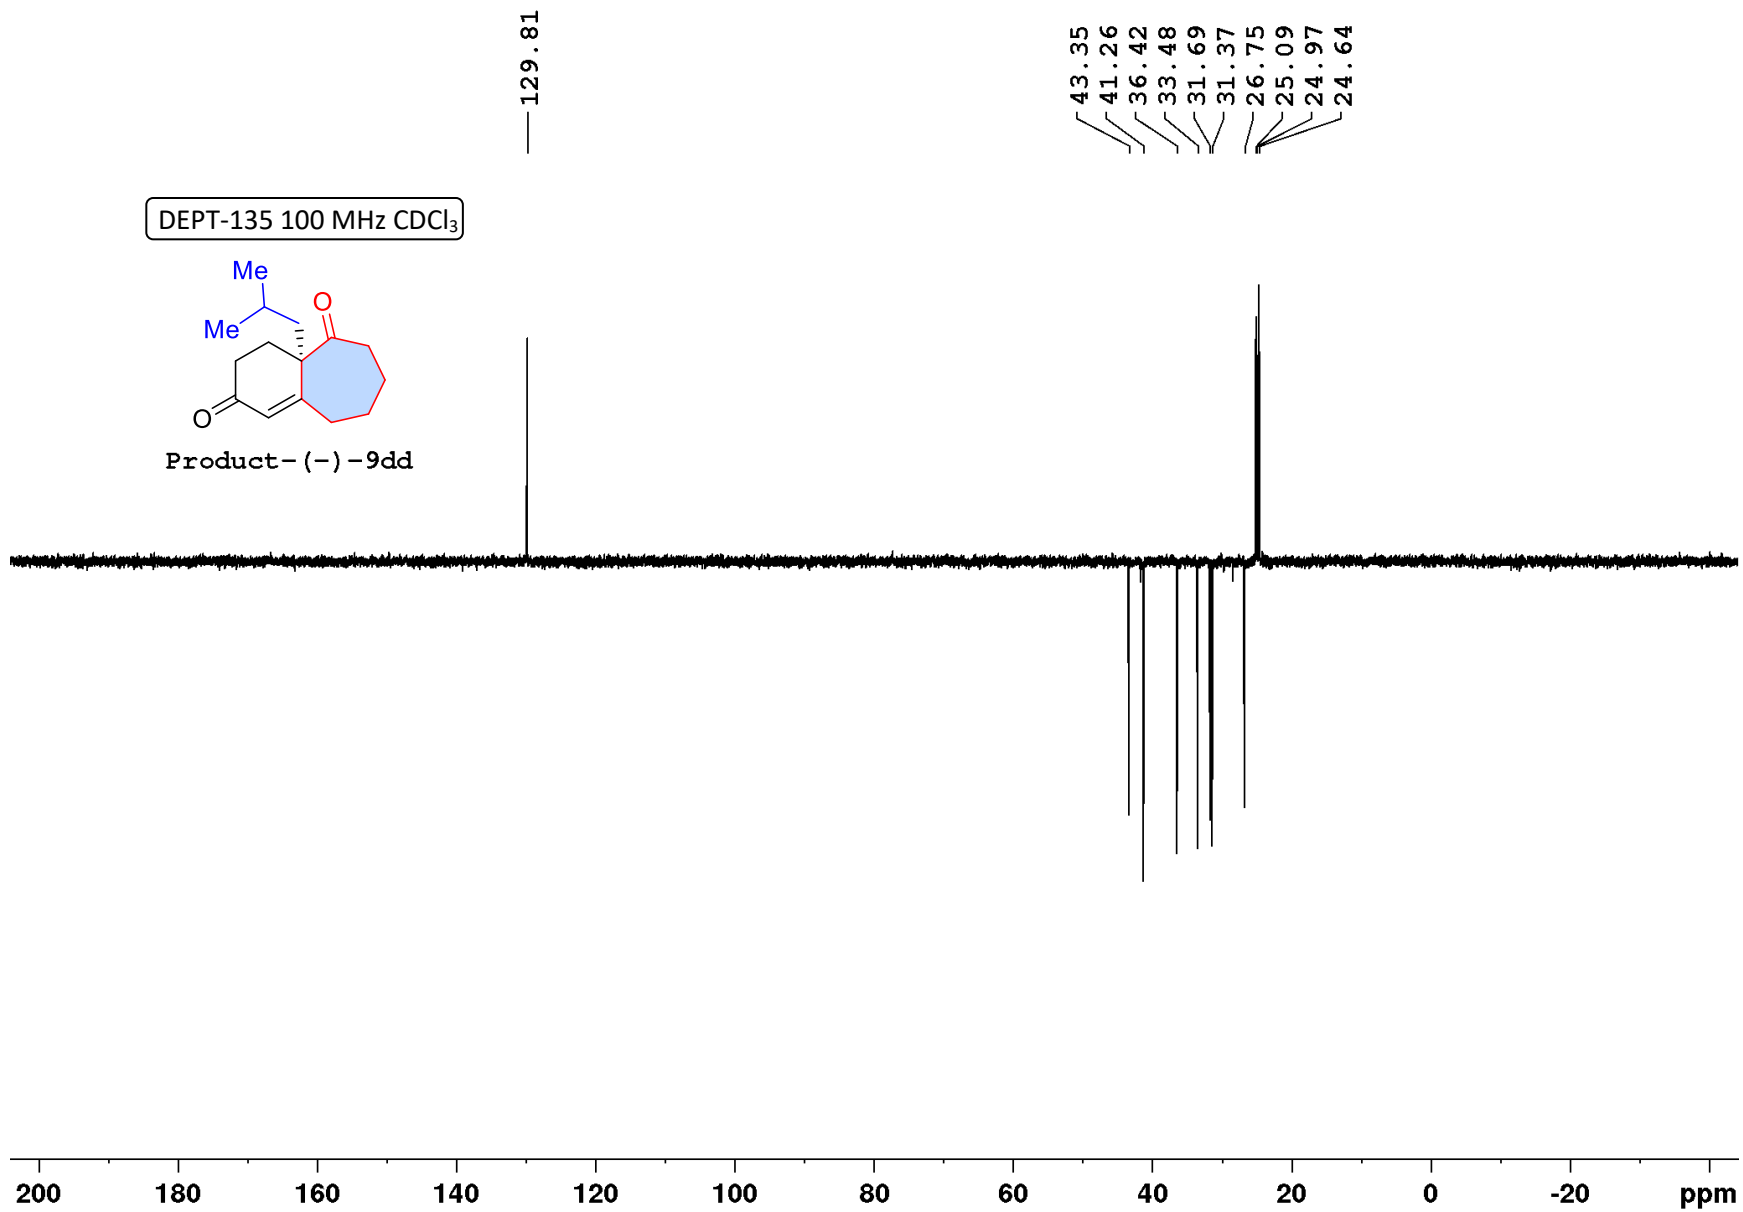

7.319  
7.309  
7.304  
7.302  
7.295  
7.290  
7.260CDCl<sub>3</sub>  
7.254  
7.245  
7.240  
6.044  
4.457  
4.433  
4.420  
4.397  
3.627  
3.618  
3.614  
3.606  
3.602  
3.593  
2.656  
2.653  
2.645  
2.633  
2.629  
2.620  
2.610  
2.604  
2.594  
2.584  
2.411  
2.409  
2.401  
2.352  
2.224  
2.211  
2.207  
2.200  
2.195  
2.183  
2.174  
2.158  
2.072  
2.059  
2.047  
2.043  
2.030  
2.017  
1.937  
1.931  
1.926  
1.918  
1.909  
1.906  
1.902  
1.891  
1.505

<sup>1</sup>H NMR 500 MHz CDCl<sub>3</sub>

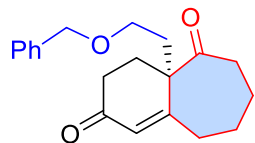

Product- (-)-9gg

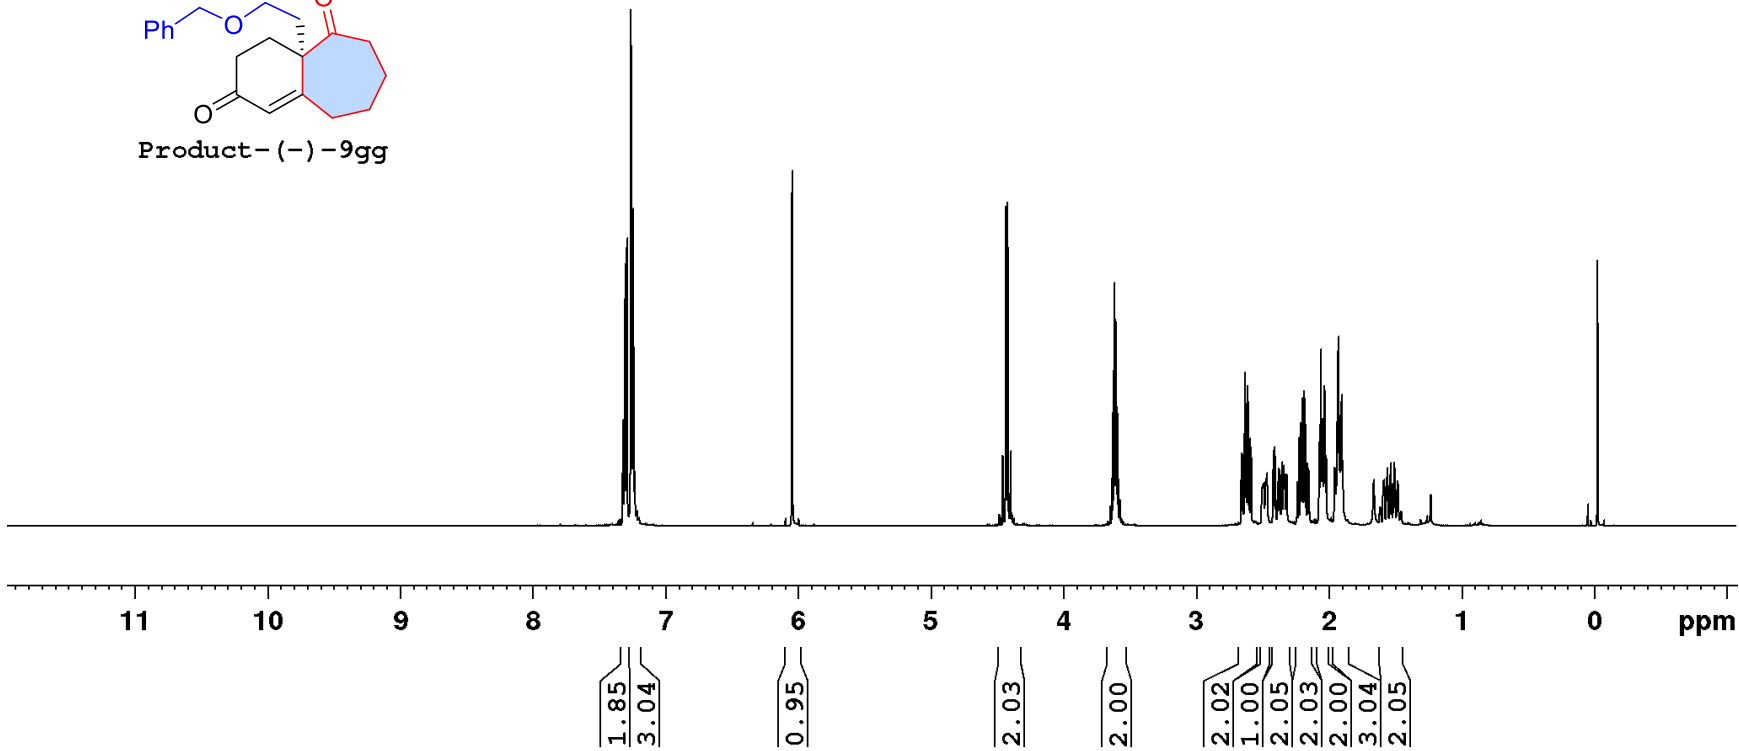

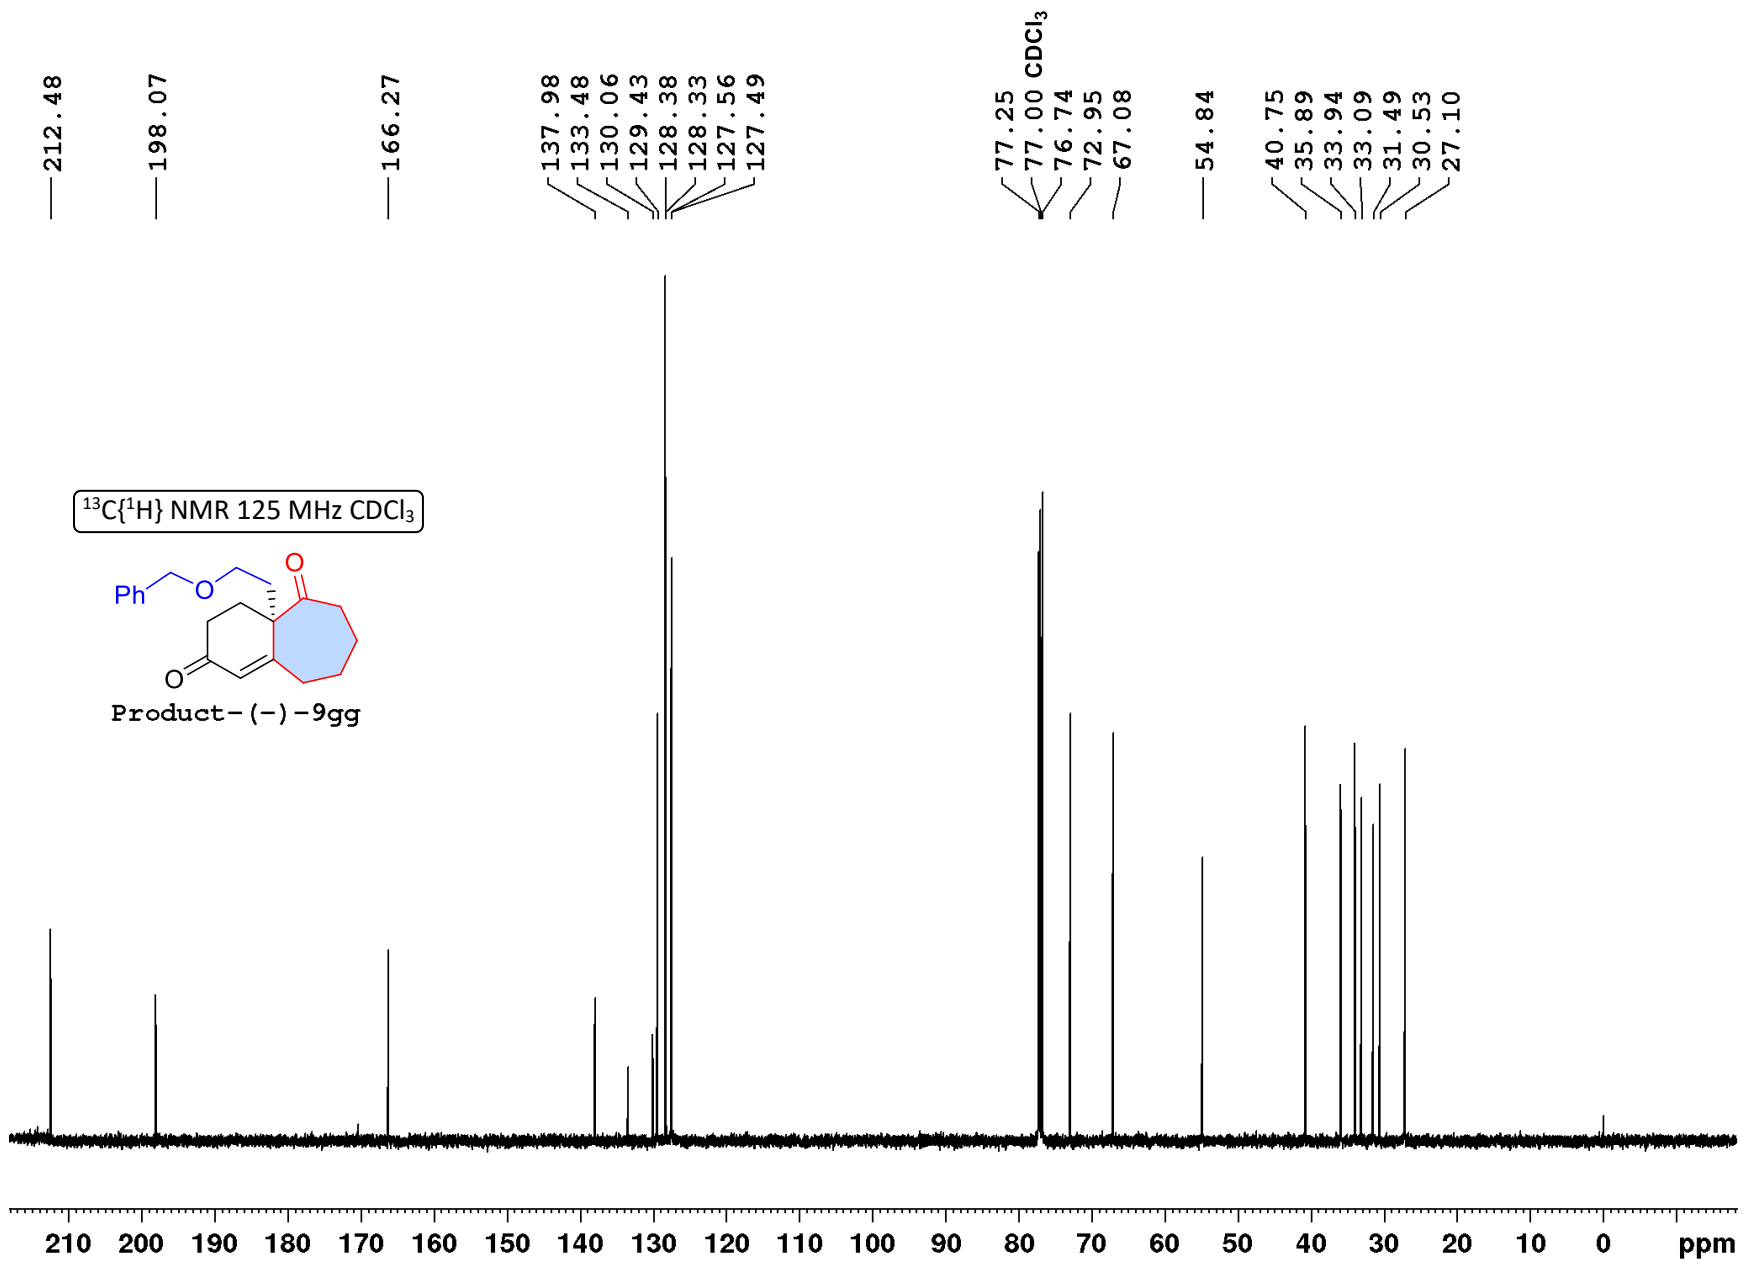

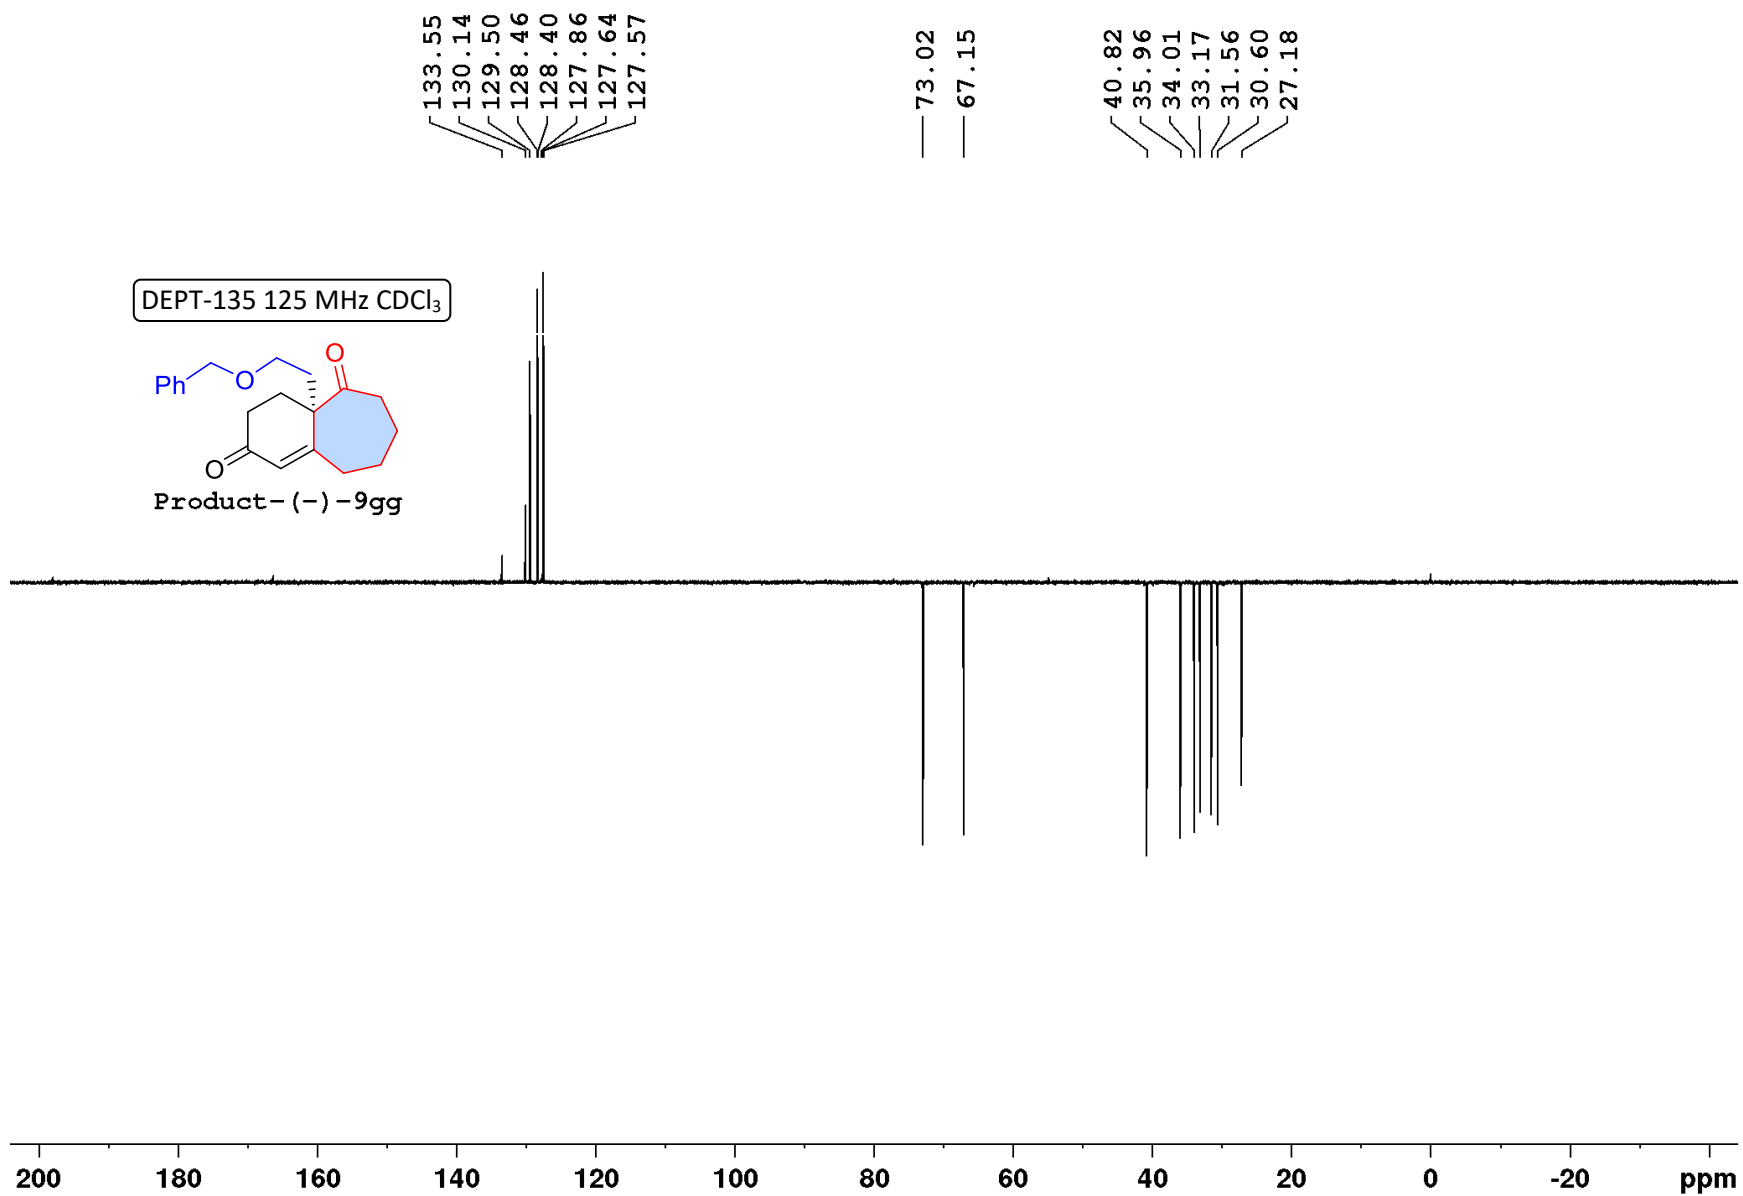

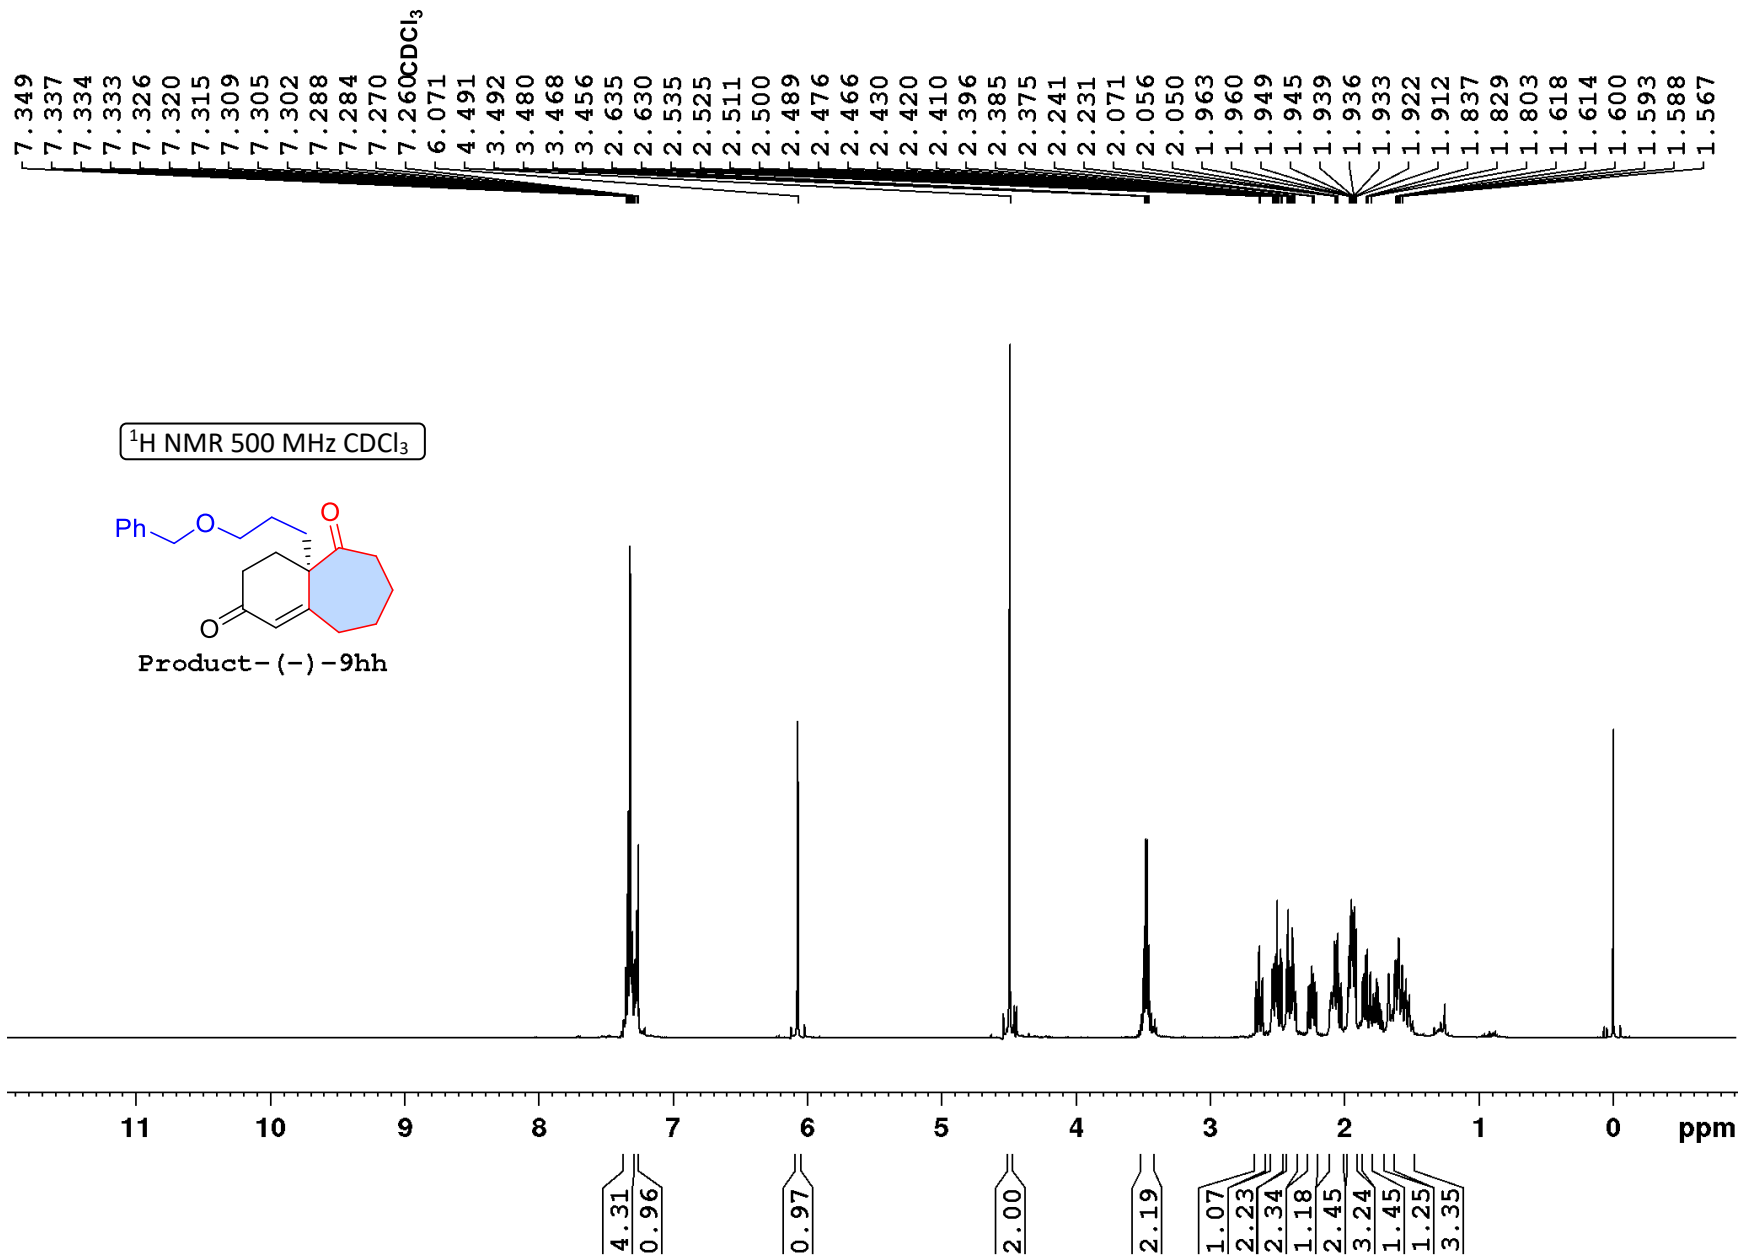

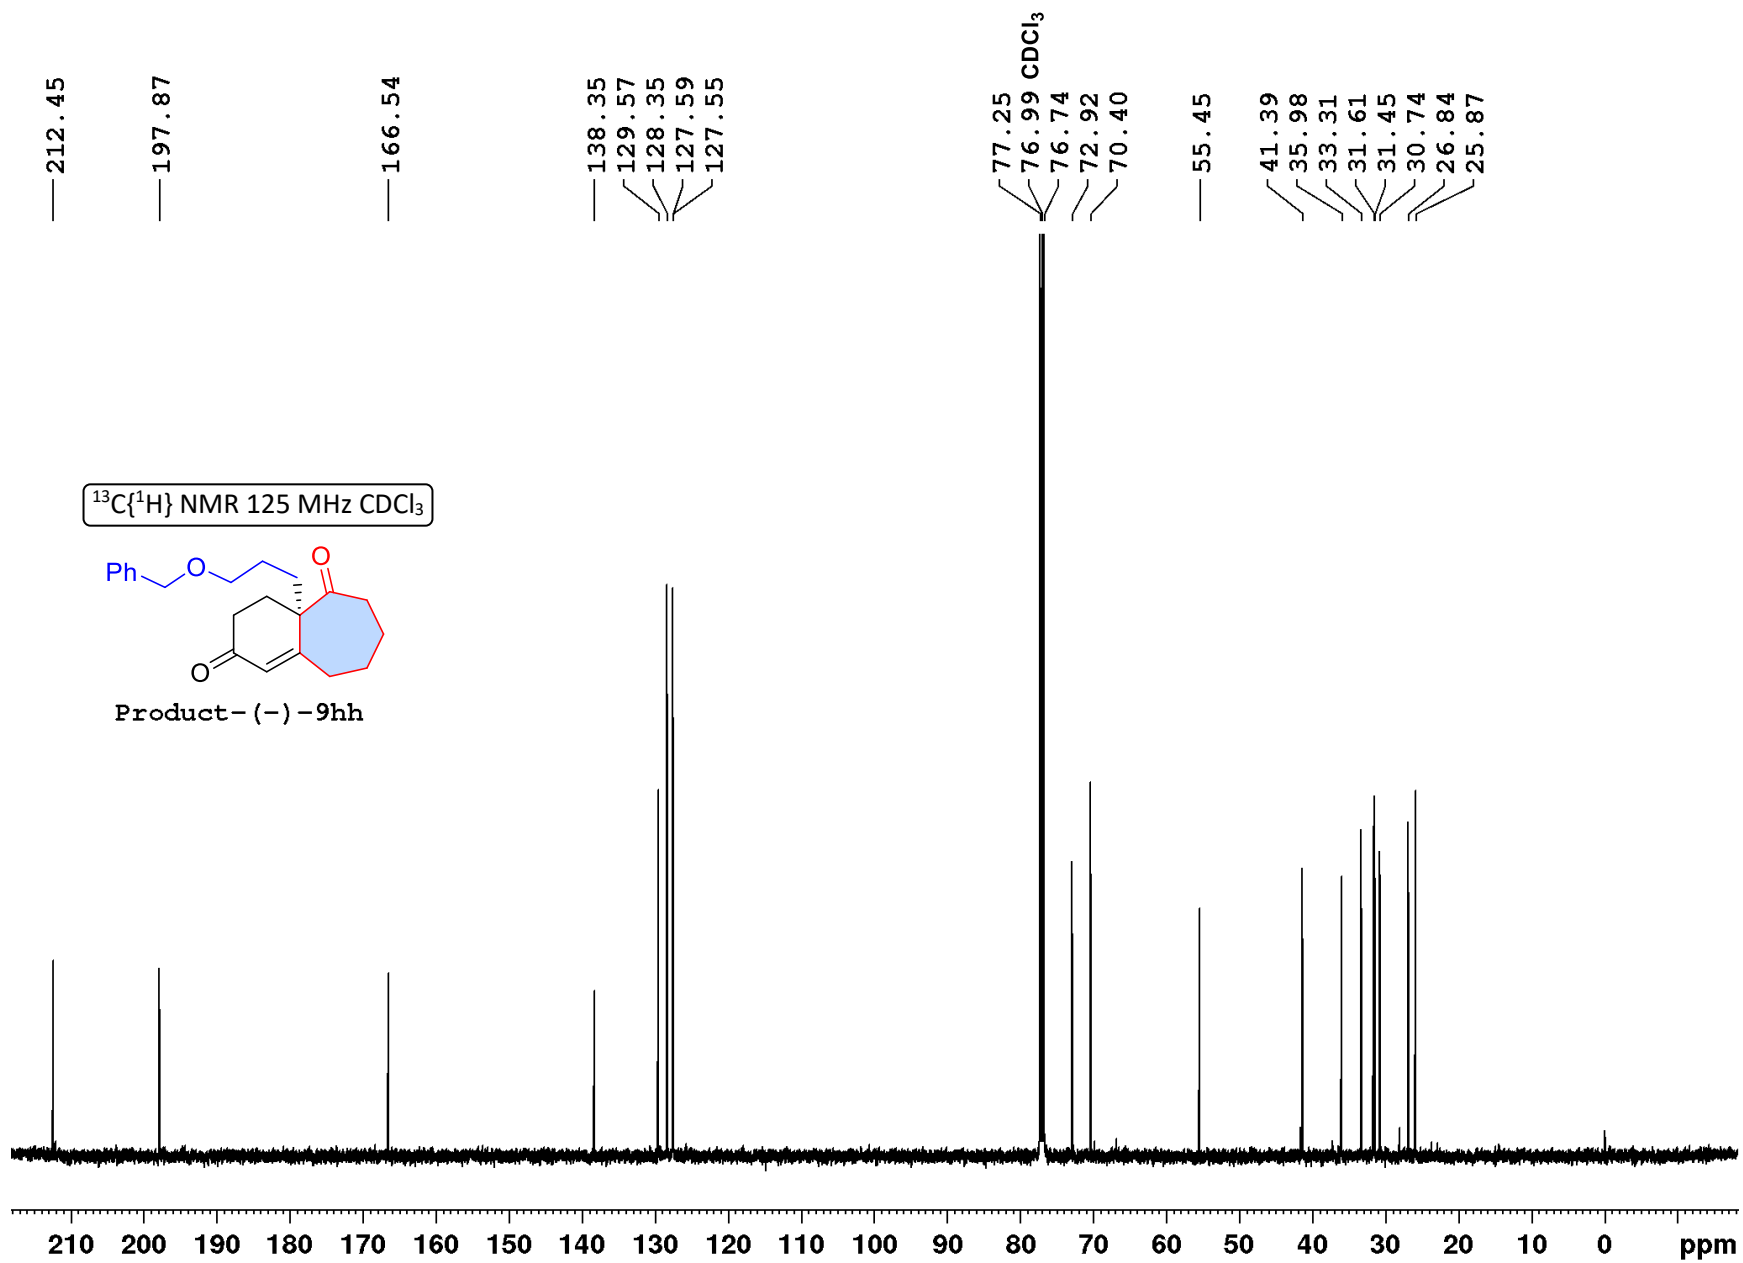



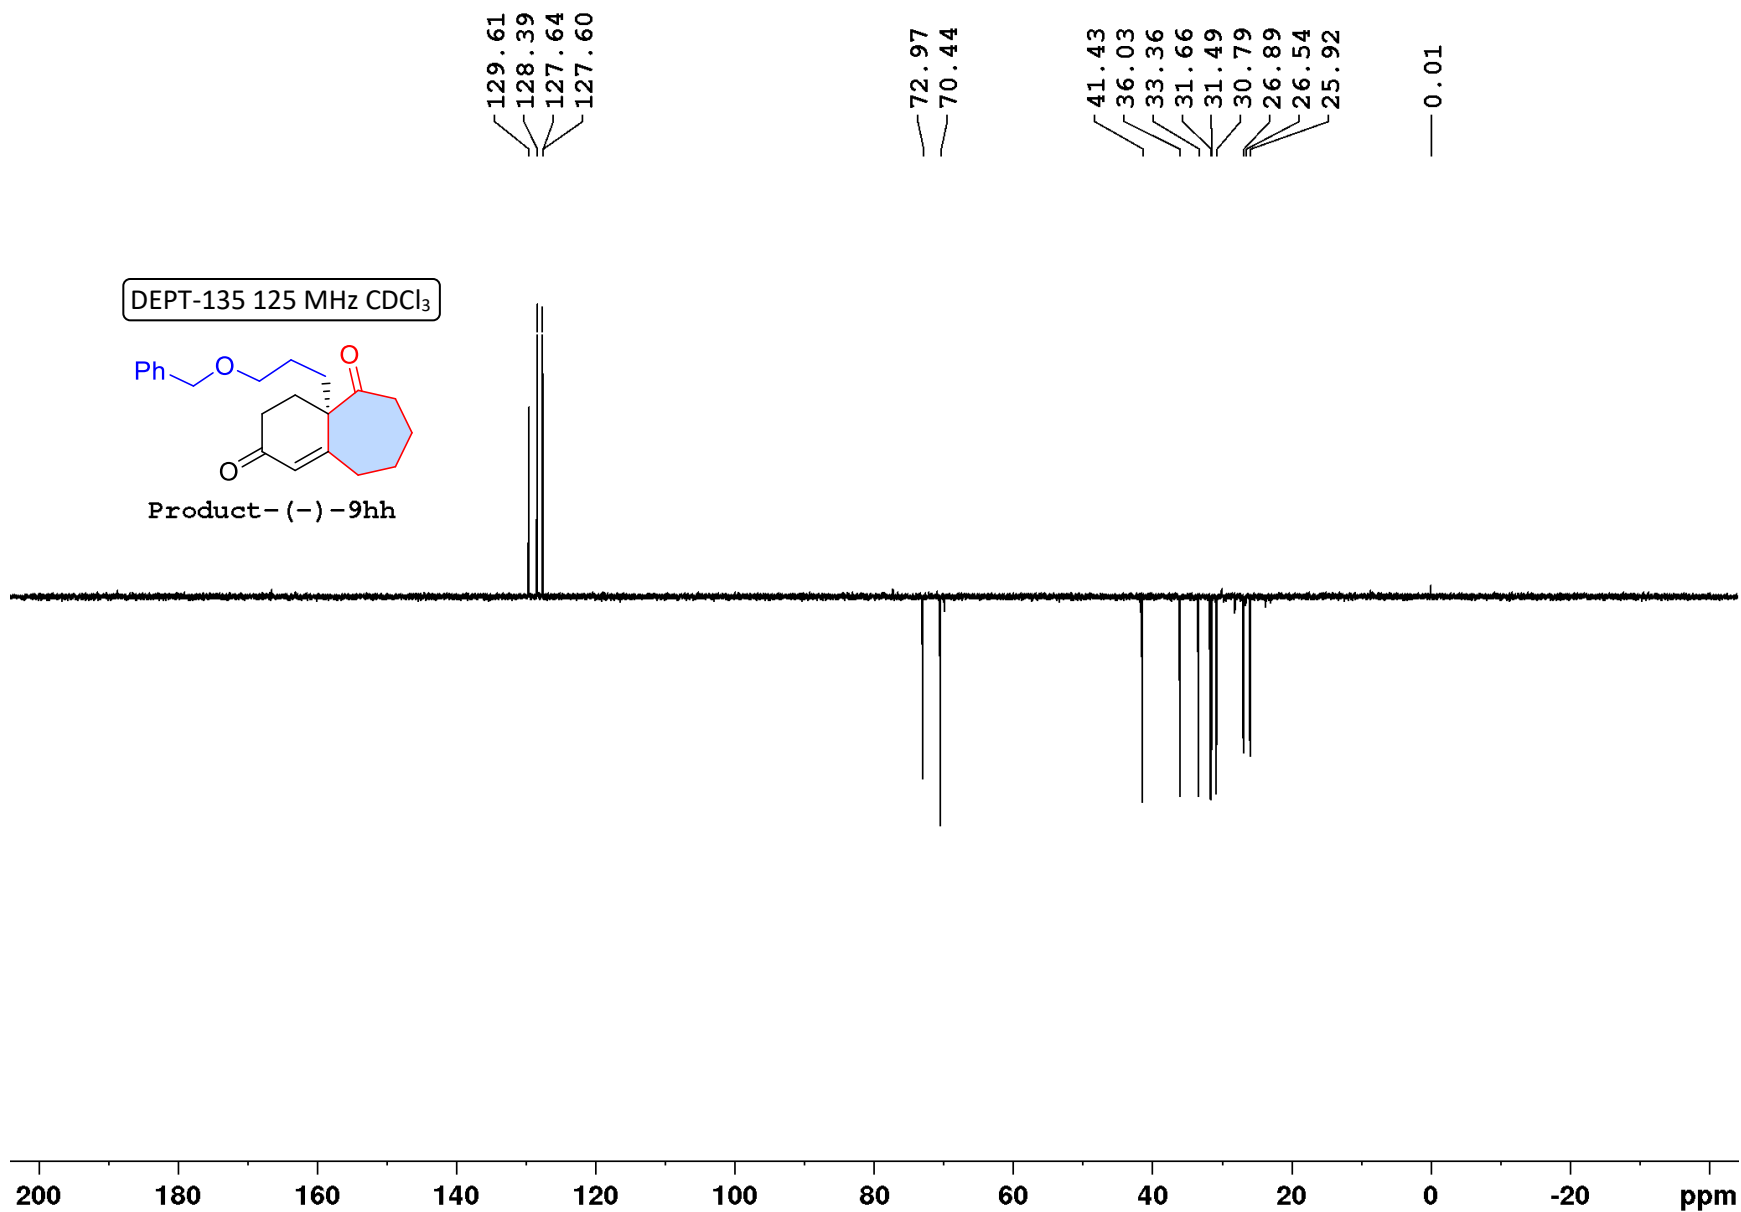

$^1\text{H}$  NMR 500 MHz  $\text{CDCl}_3$

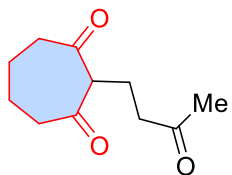

Product-6pp

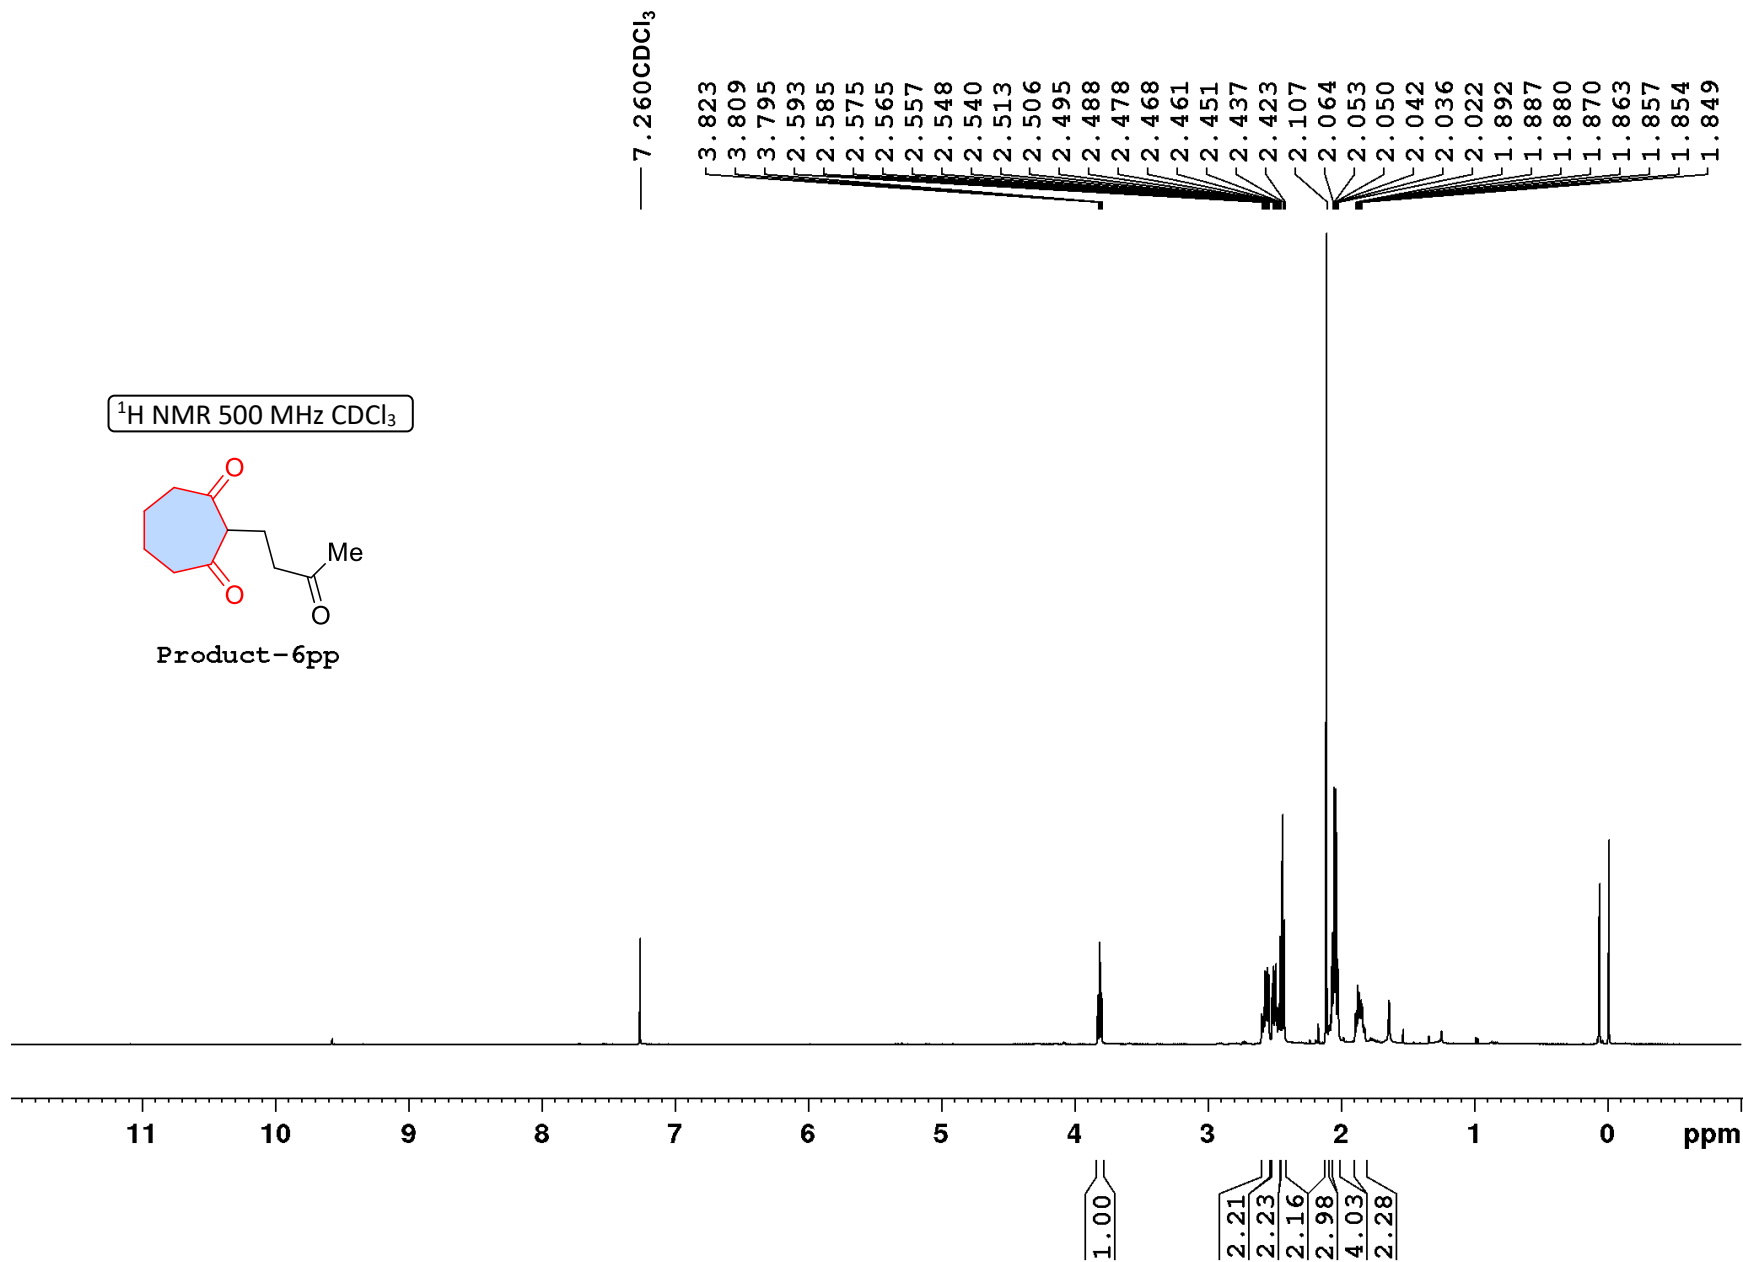

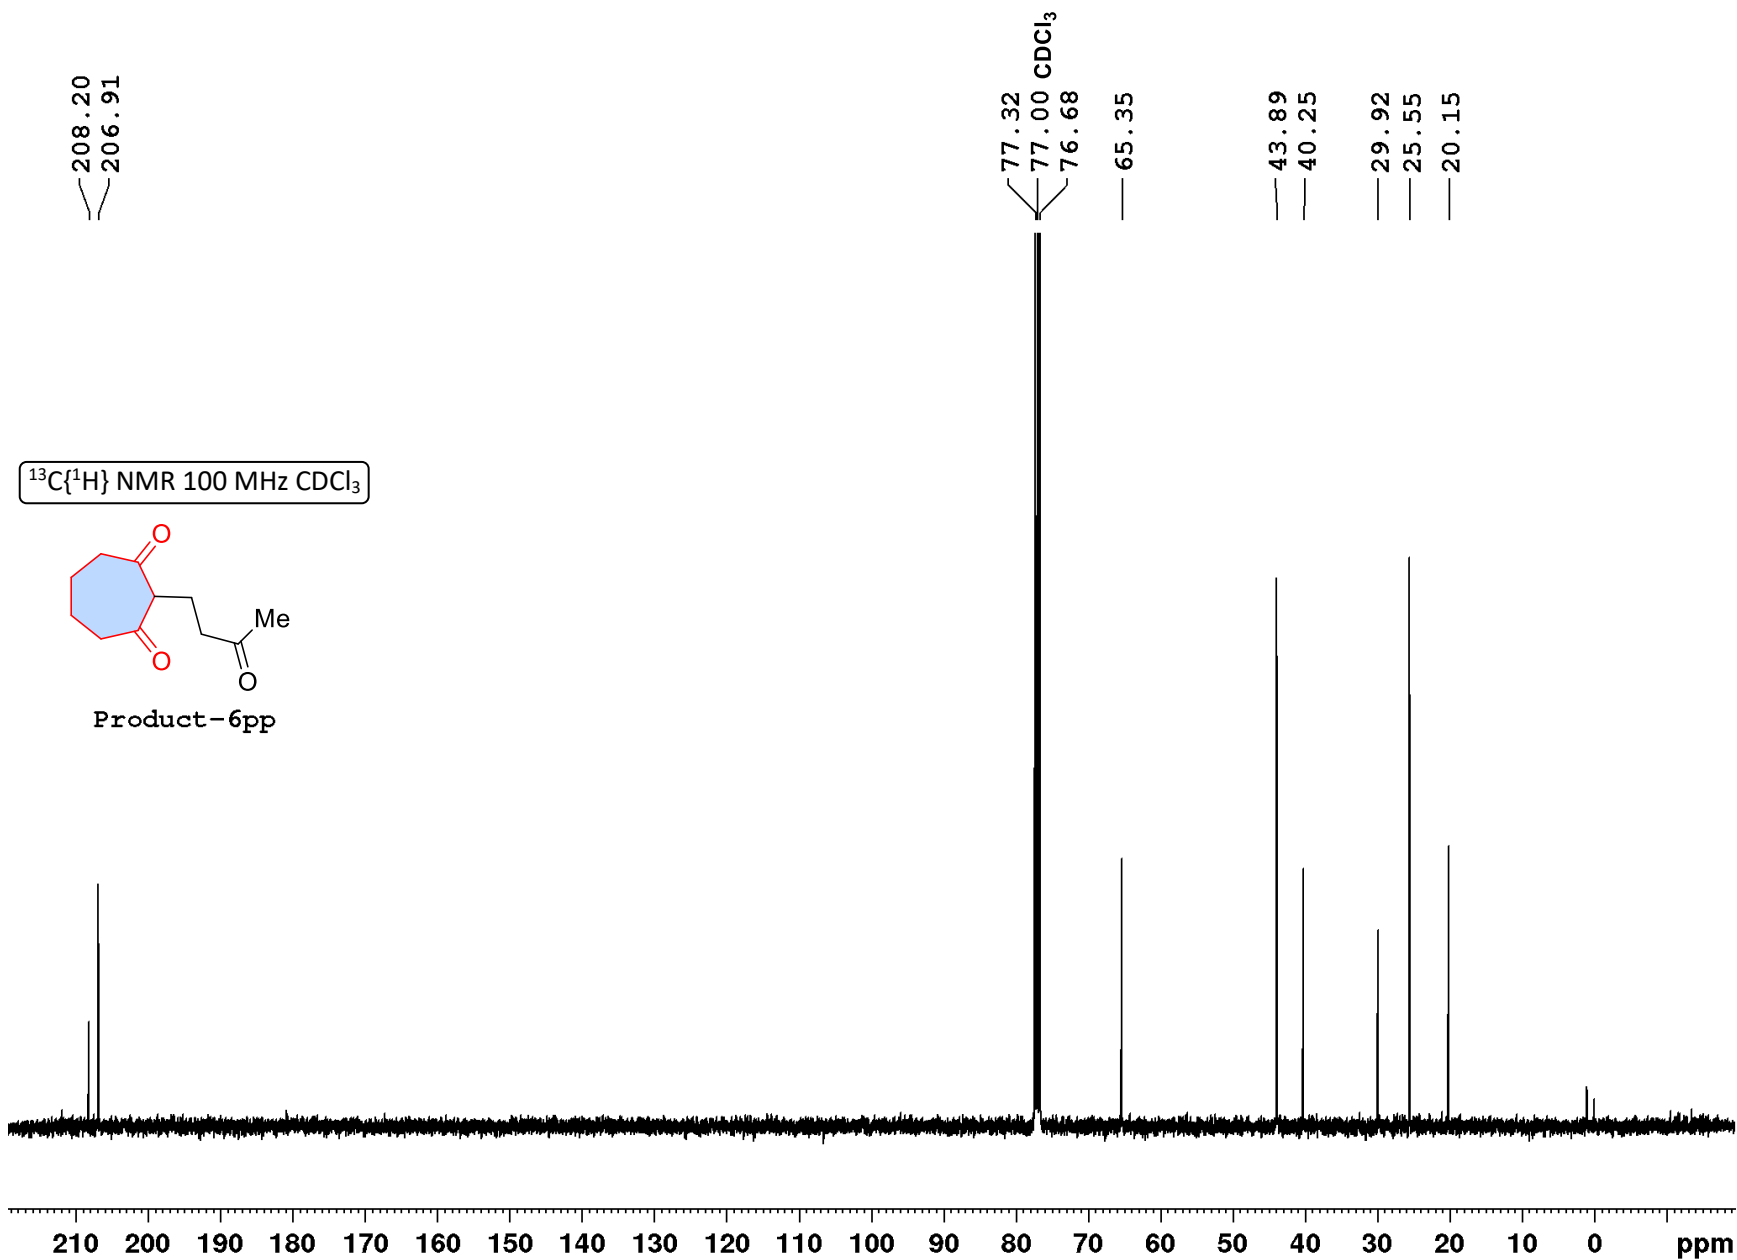

DEPT-135 100 MHz CDCl<sub>3</sub>

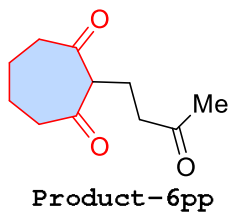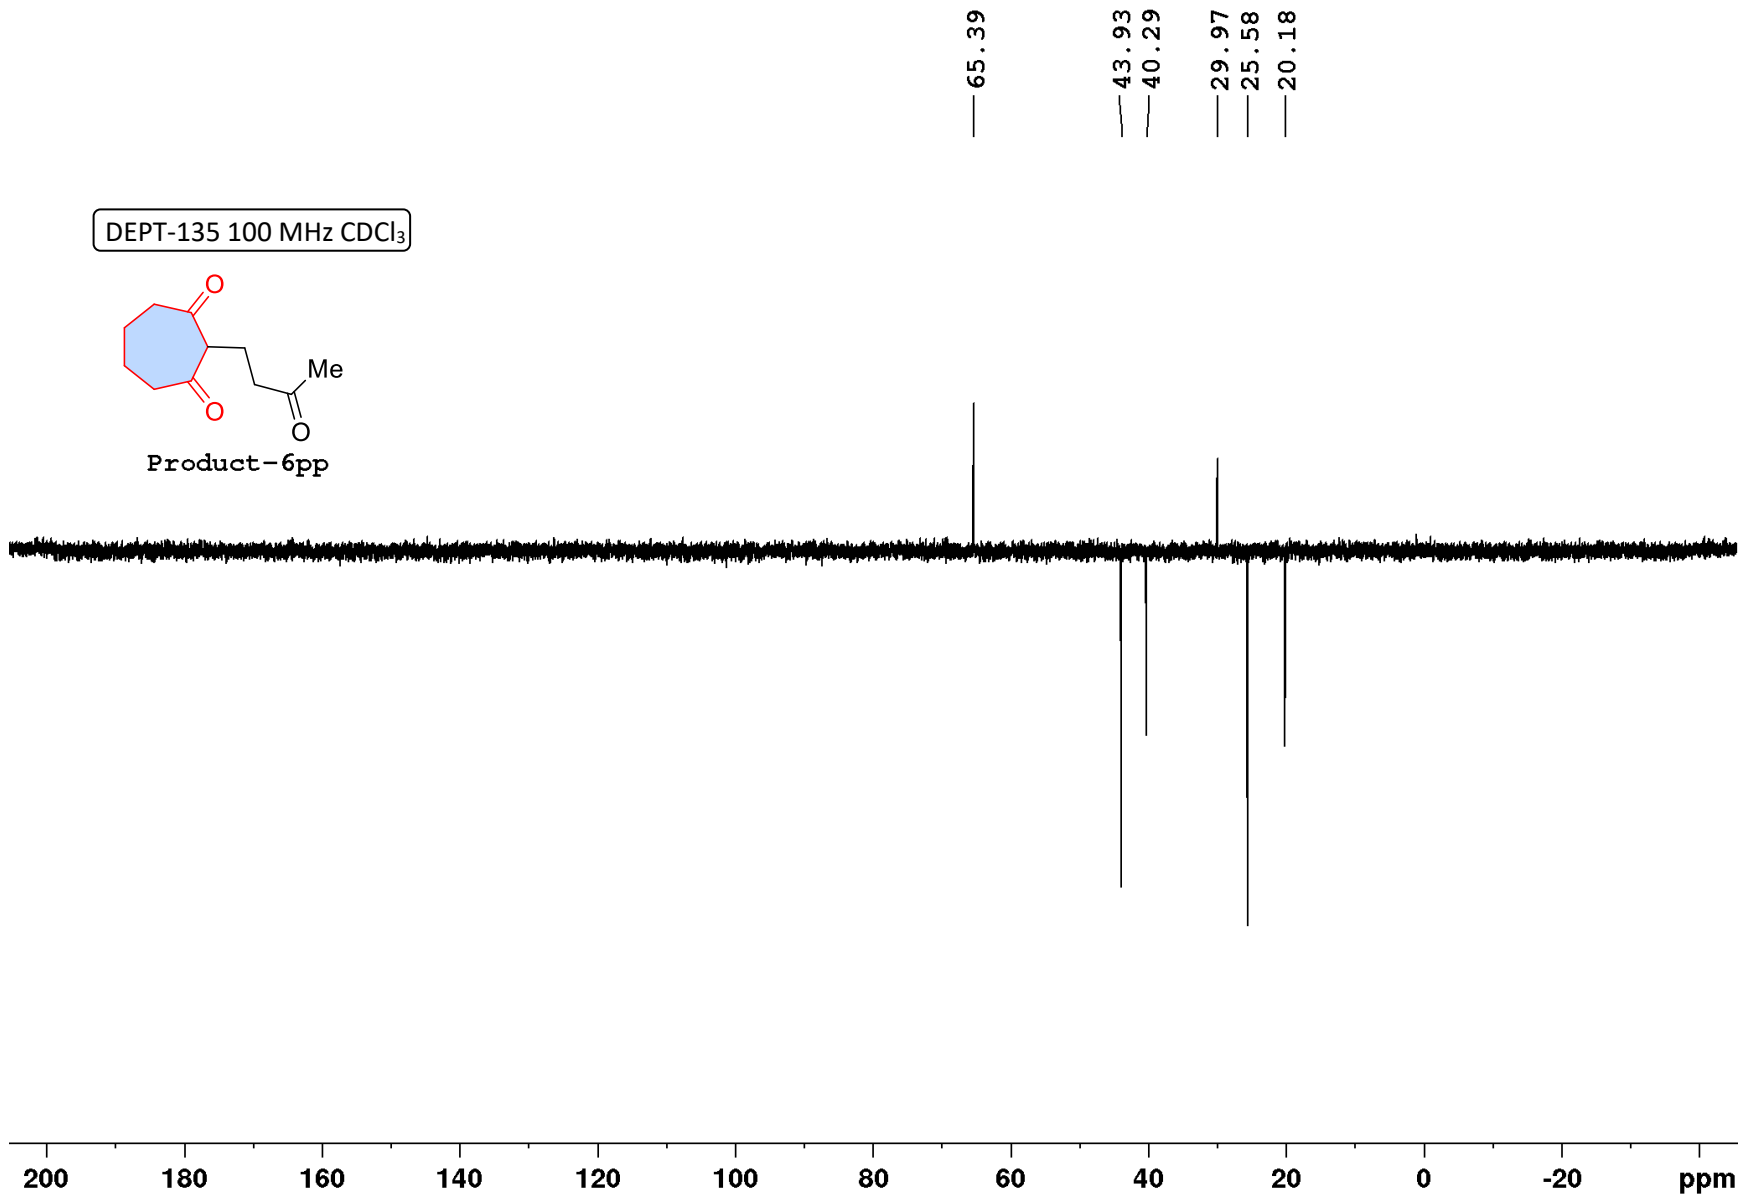

<sup>1</sup>H NMR 500 MHz CDCl<sub>3</sub>

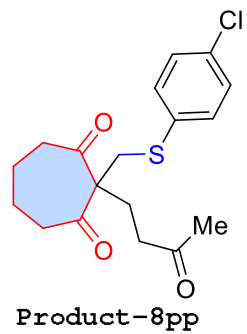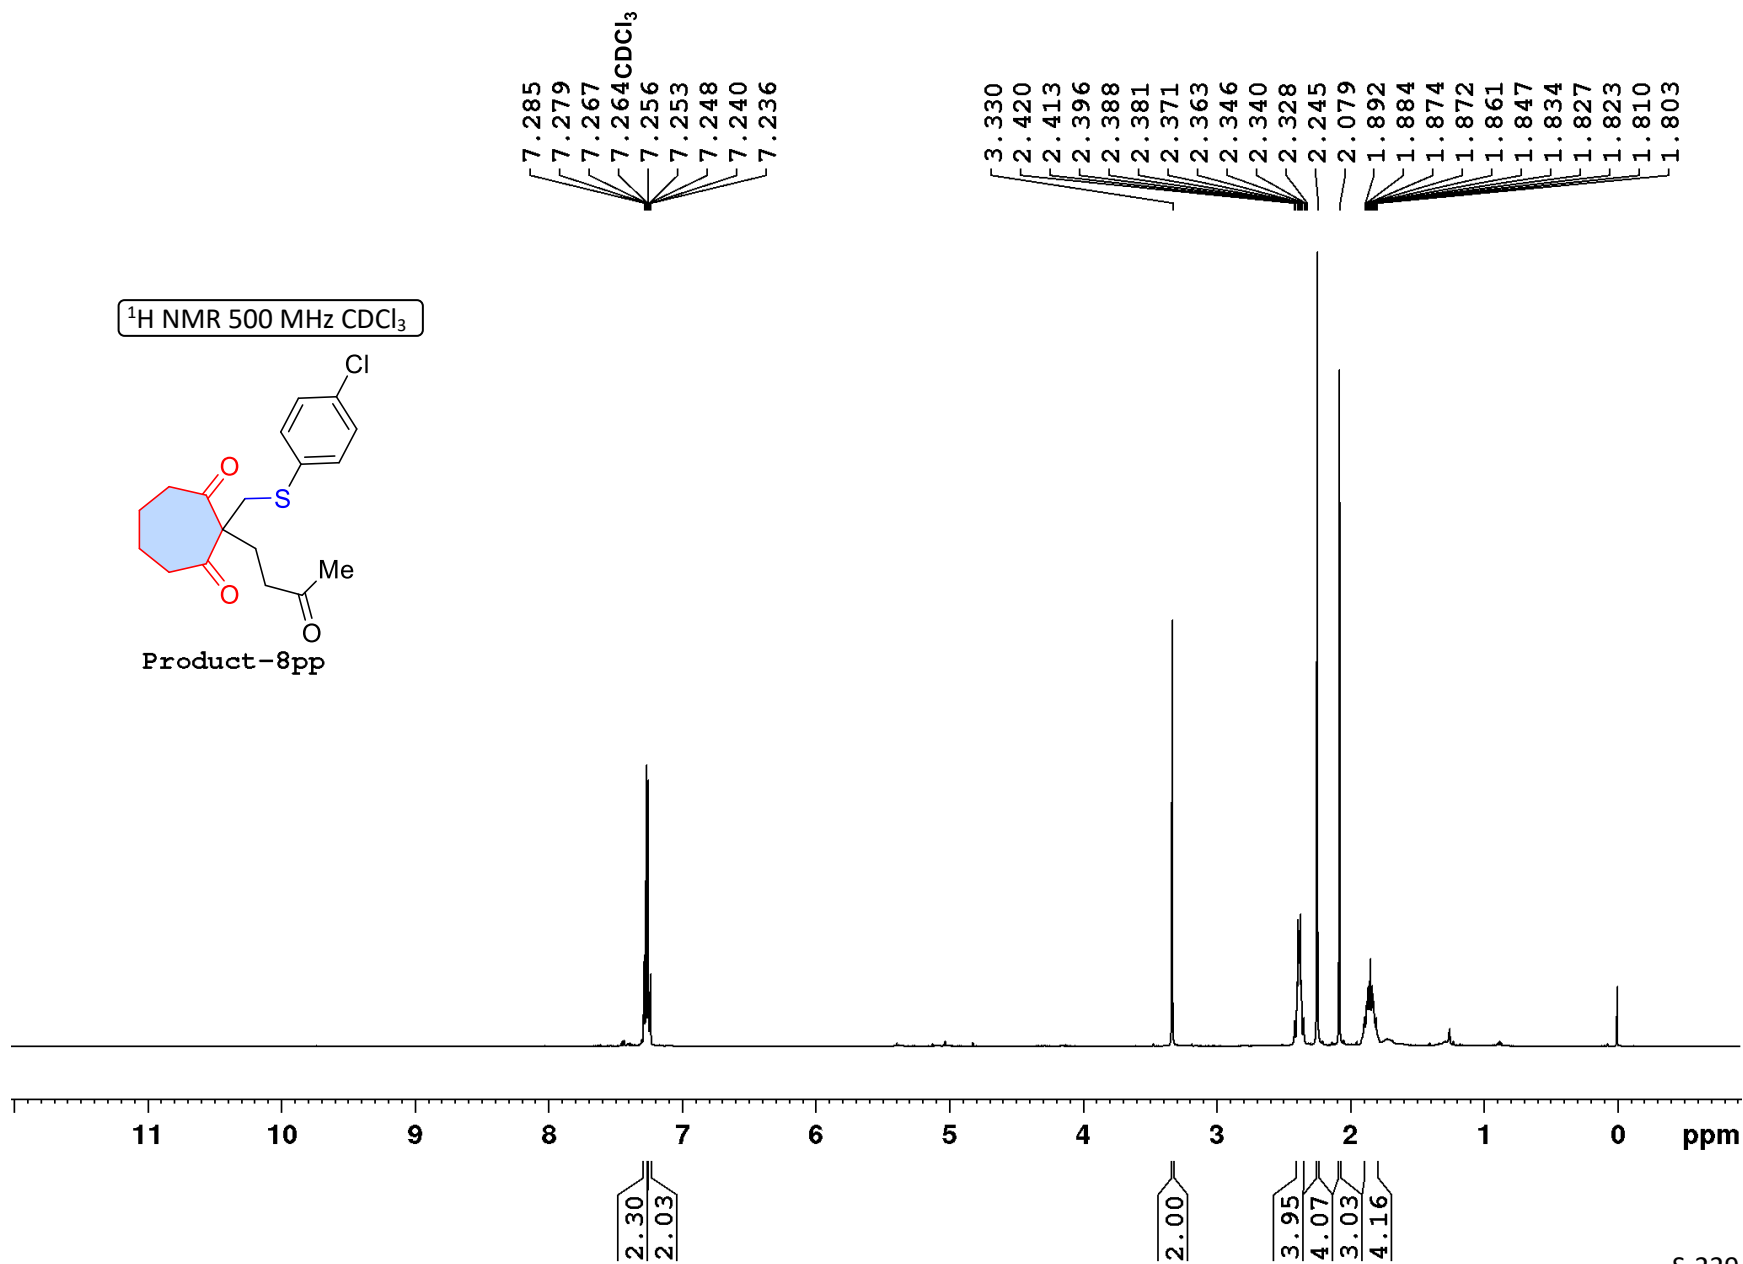

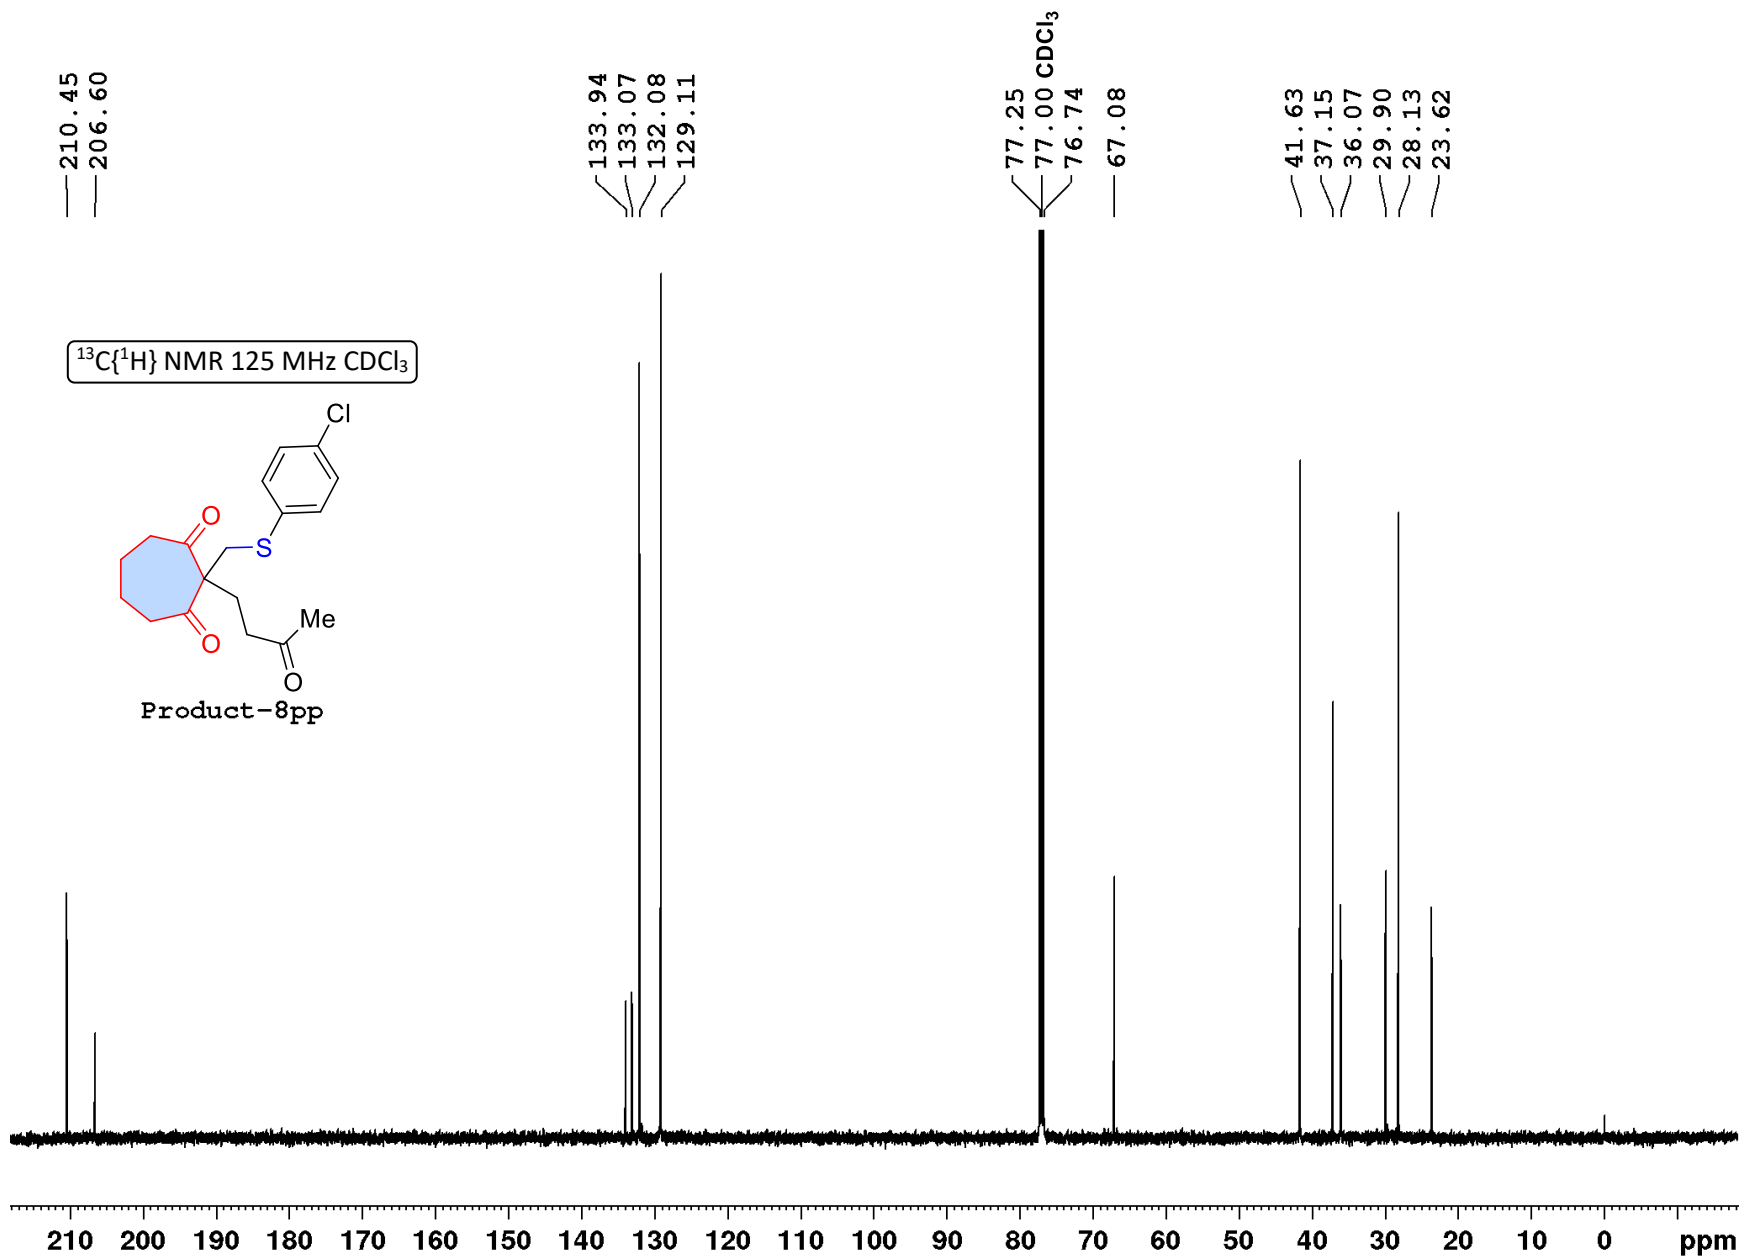

DEPT-135 125 MHz CDCl<sub>3</sub>

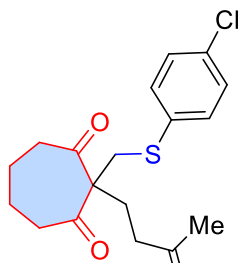

Product-8pp

132.12  
129.16

41.68  
37.19  
36.09  
29.97  
28.19  
23.63

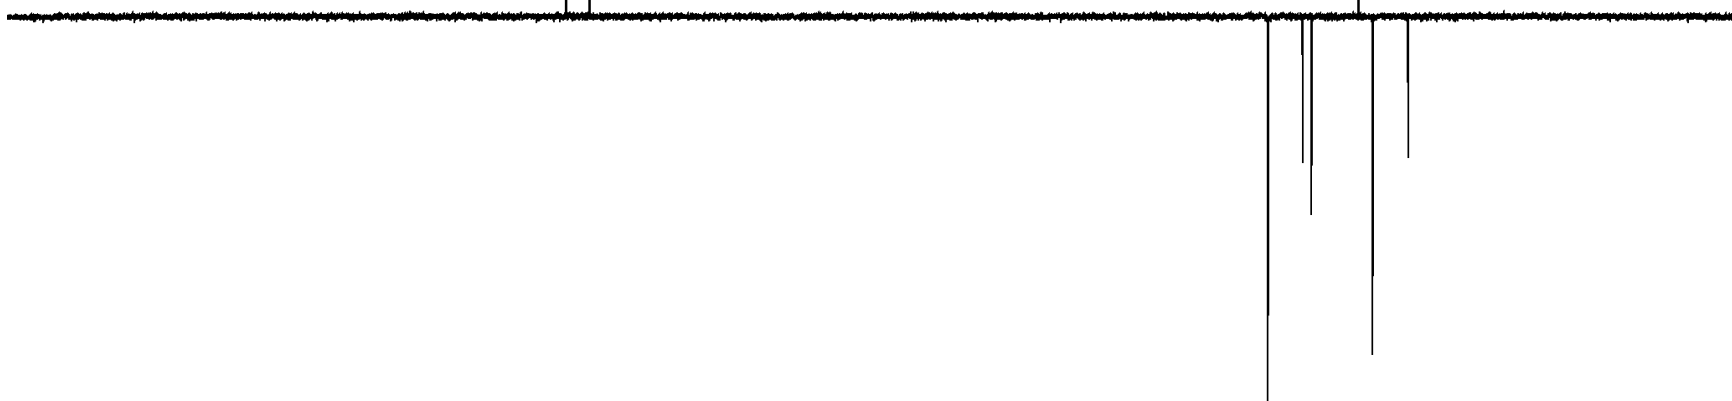

200 190 180 170 160 150 140 130 120 110 100 90 80 70 60 50 40 30 20 10 0 ppm

7.291  
7.278  
7.274  
7.269  
7.260CDCl<sub>3</sub>  
7.246  
7.242  
7.229  
6.118  
3.511  
3.484  
3.236  
3.210  
2.687  
2.668  
2.664  
2.644  
2.639  
2.577  
2.564  
2.551  
2.542  
2.528  
2.430  
2.422  
2.418  
2.414  
2.412  
2.404  
2.395  
2.377  
2.368  
2.279  
2.277  
2.271  
2.266  
2.258  
2.254  
2.243  
2.070  
2.032  
2.007  
2.001  
1.981  
1.976  
1.625  
1.621  
1.618  
1.613  
1.607  
1.600  
1.597  
1.593  
1.568  
1.564  
1.561  
1.537  
1.511

<sup>1</sup>H NMR 500 MHz CDCl<sub>3</sub>

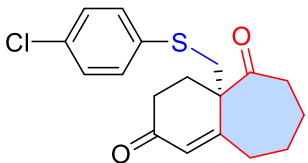

Product - (-) -9pp

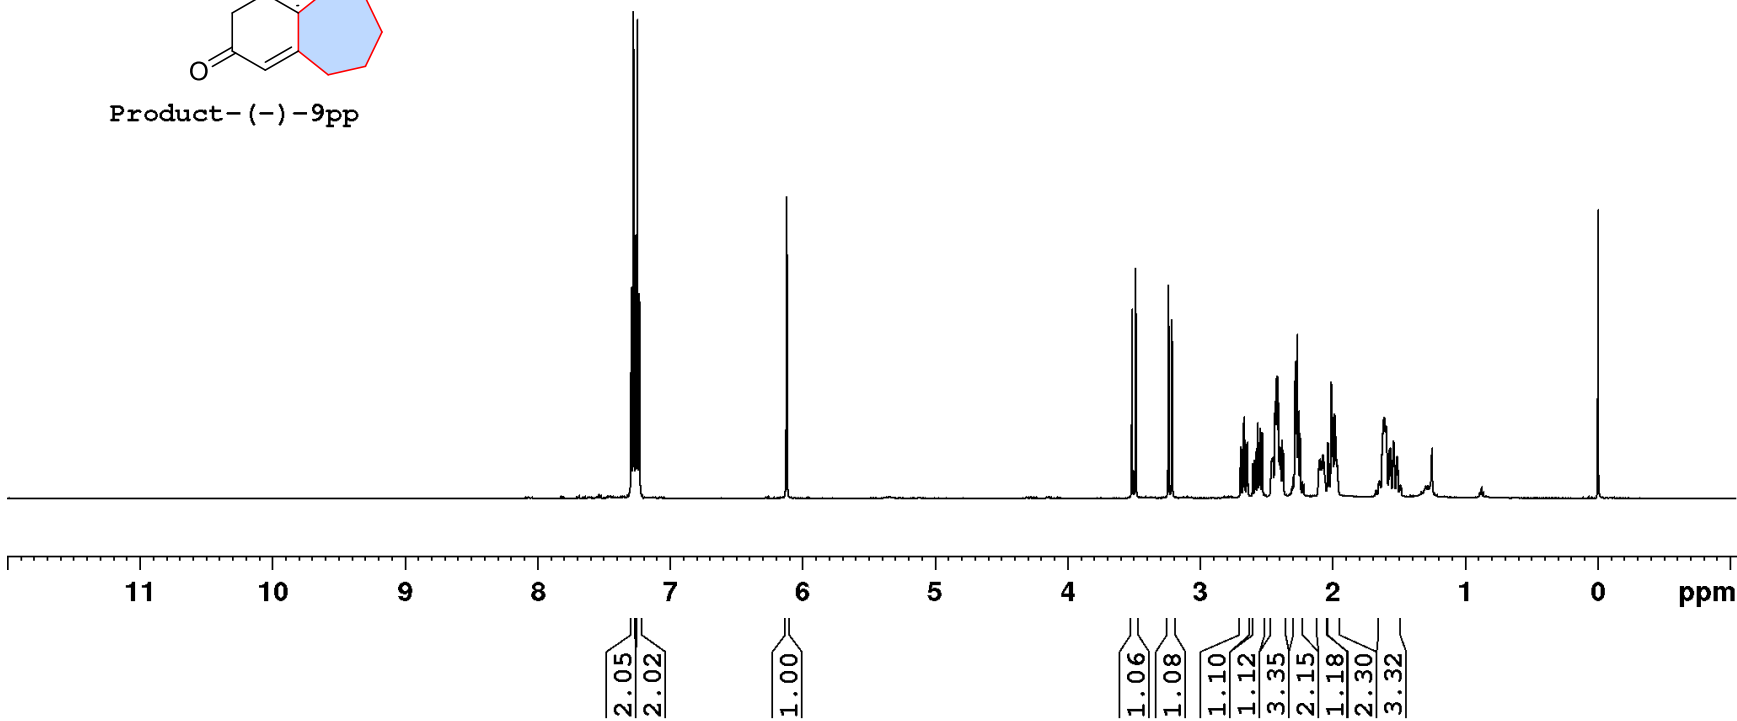



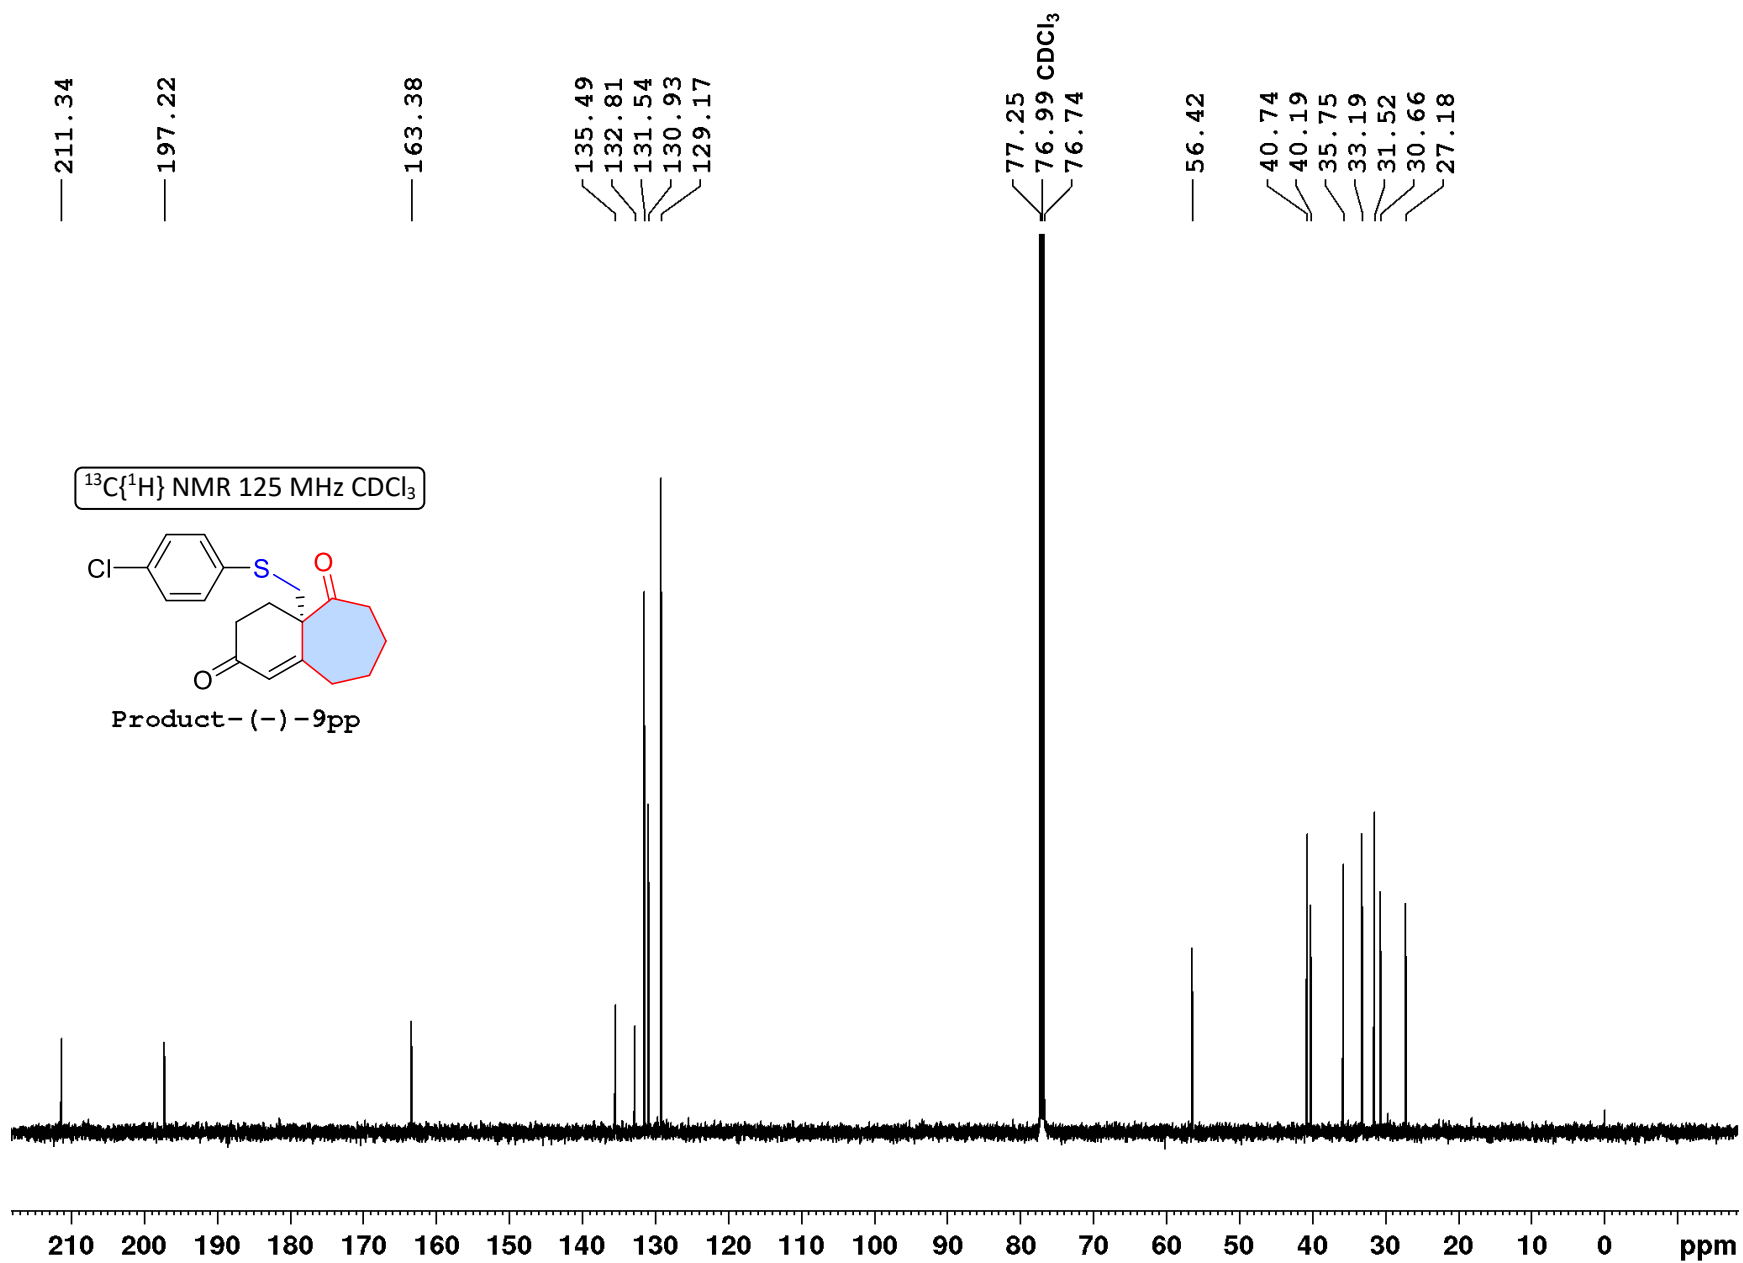

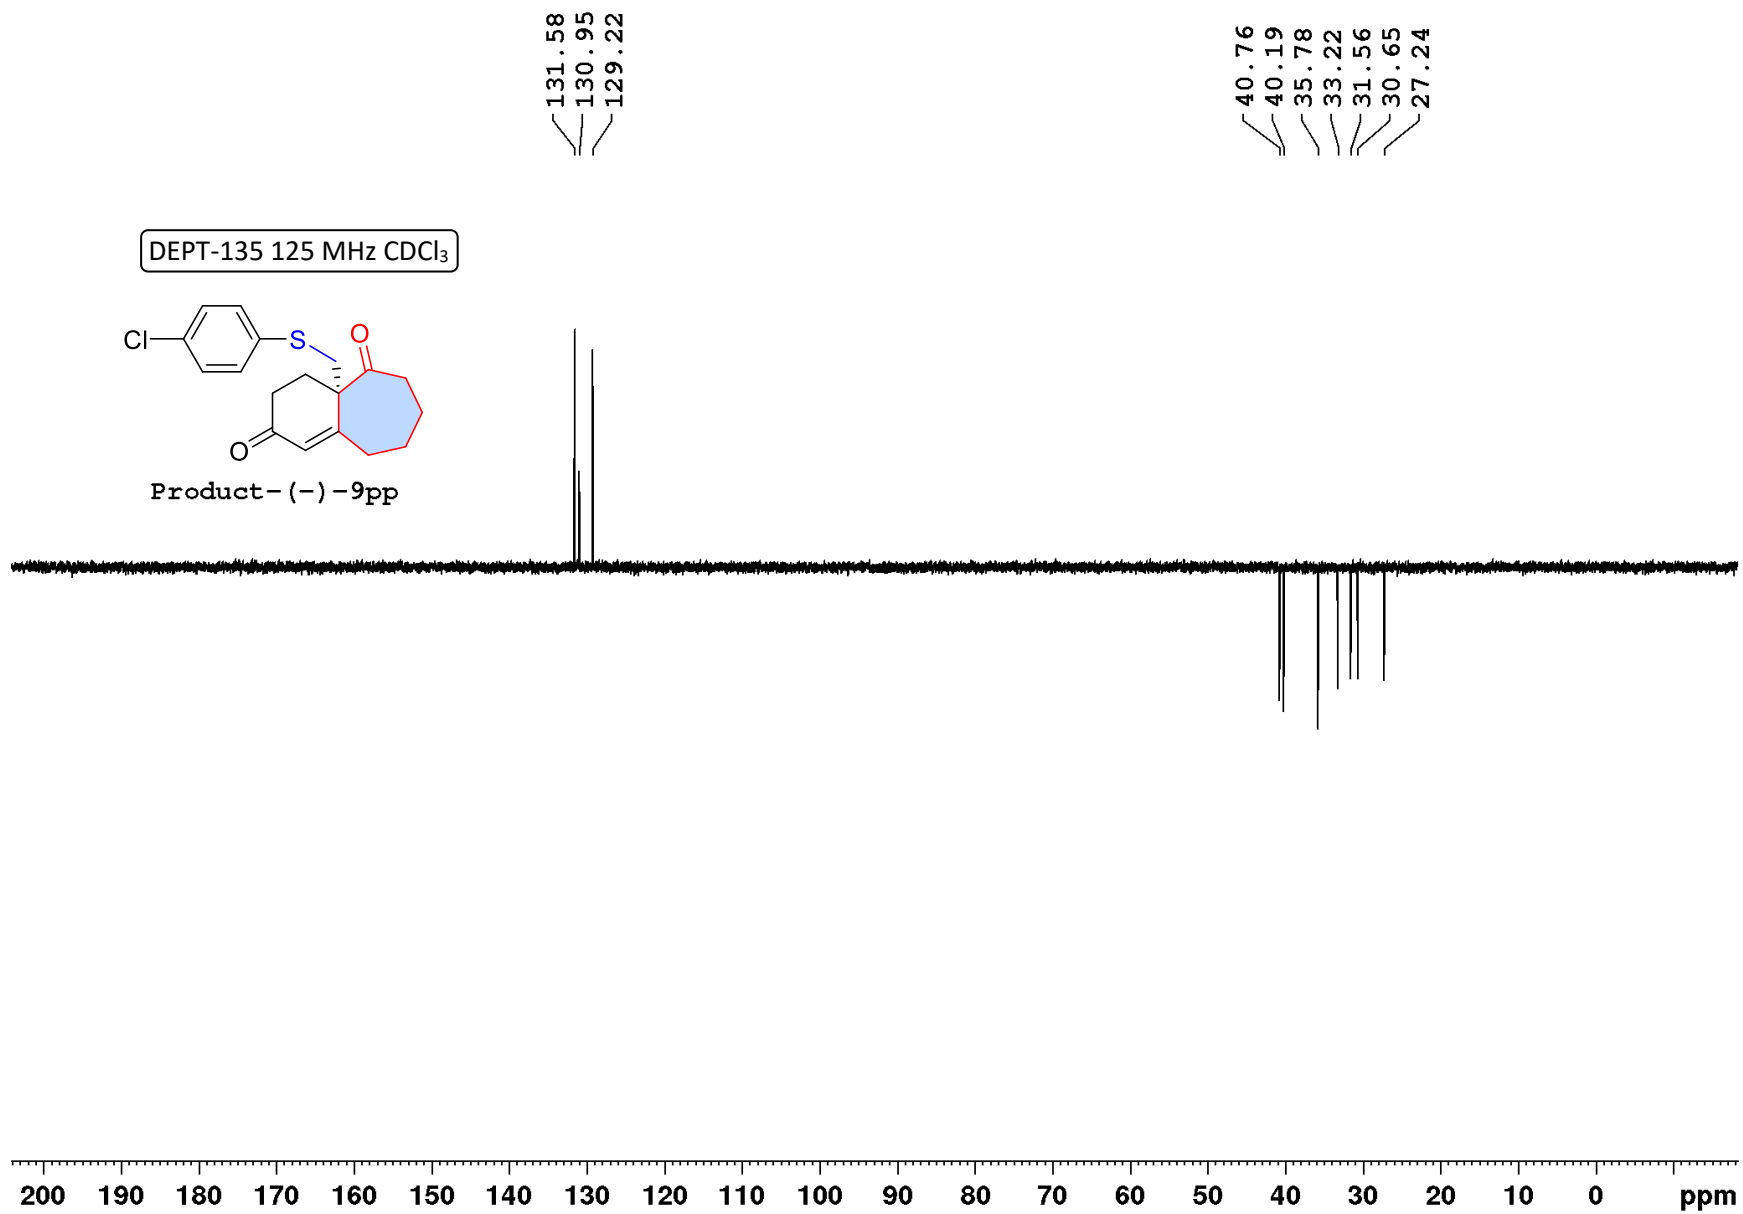

7.263 CDCl<sub>3</sub>

7.245  
7.232  
7.228  
7.220  
7.217  
7.216  
7.201  
7.198  
7.187  
7.168  
7.165  
7.152  
5.842  
5.837  
4.126  
3.160  
3.133  
3.098  
3.070  
2.675  
2.671  
2.667  
2.310  
2.297  
2.294  
2.288  
2.275  
2.273  
1.908  
1.905  
1.902  
1.898  
1.894  
1.893  
1.890  
1.885  
1.879  
1.875  
1.753  
1.683  
1.673  
1.664  
1.648  
1.640  
1.504  
1.500  
1.478  
1.474  
1.445  
1.443  
1.438  
1.426  
1.423  
1.421  
1.418  
1.402  
0.961

<sup>1</sup>H NMR 500 MHz CDCl<sub>3</sub>

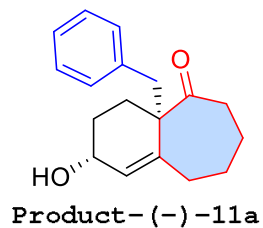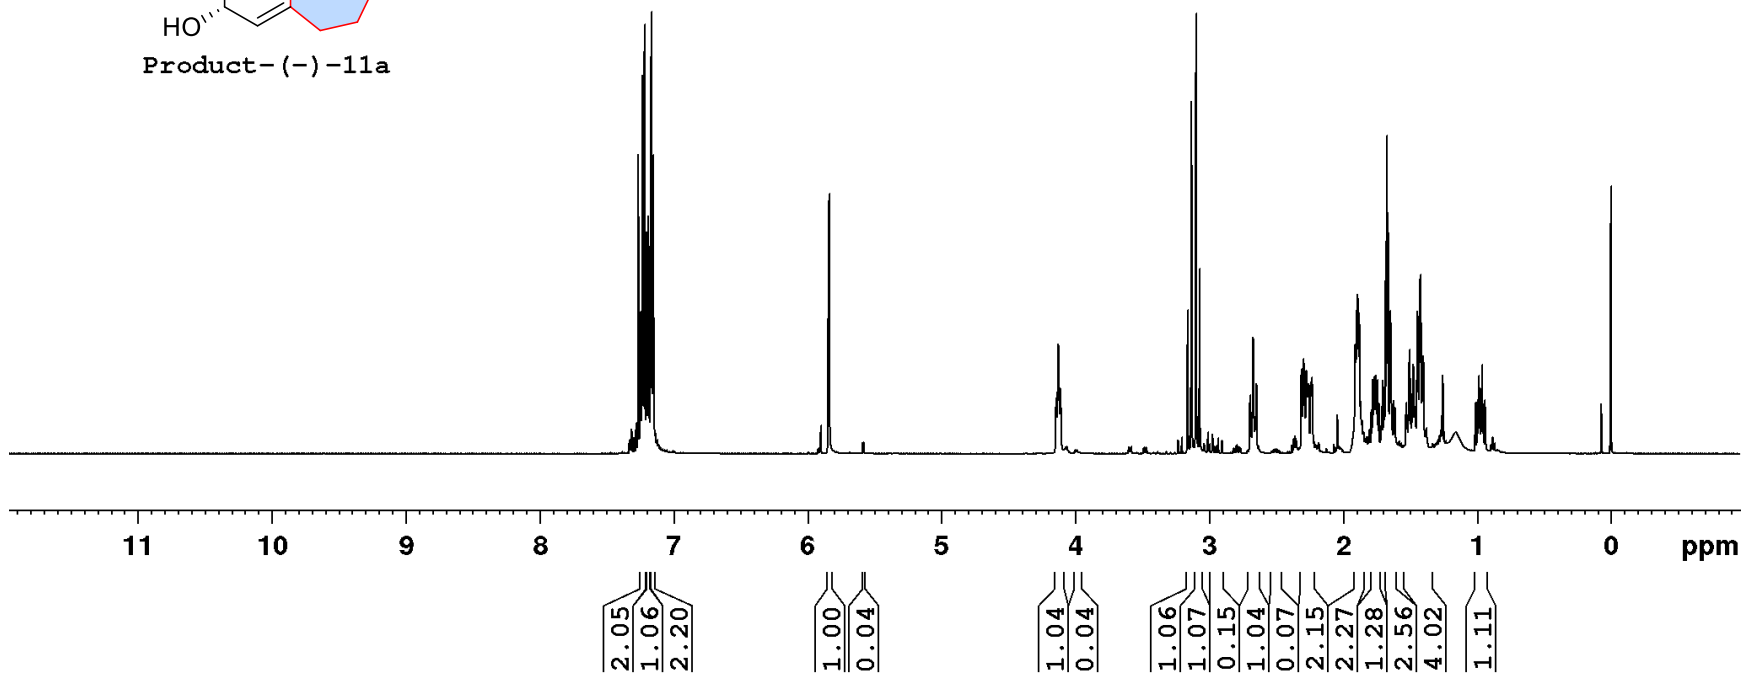

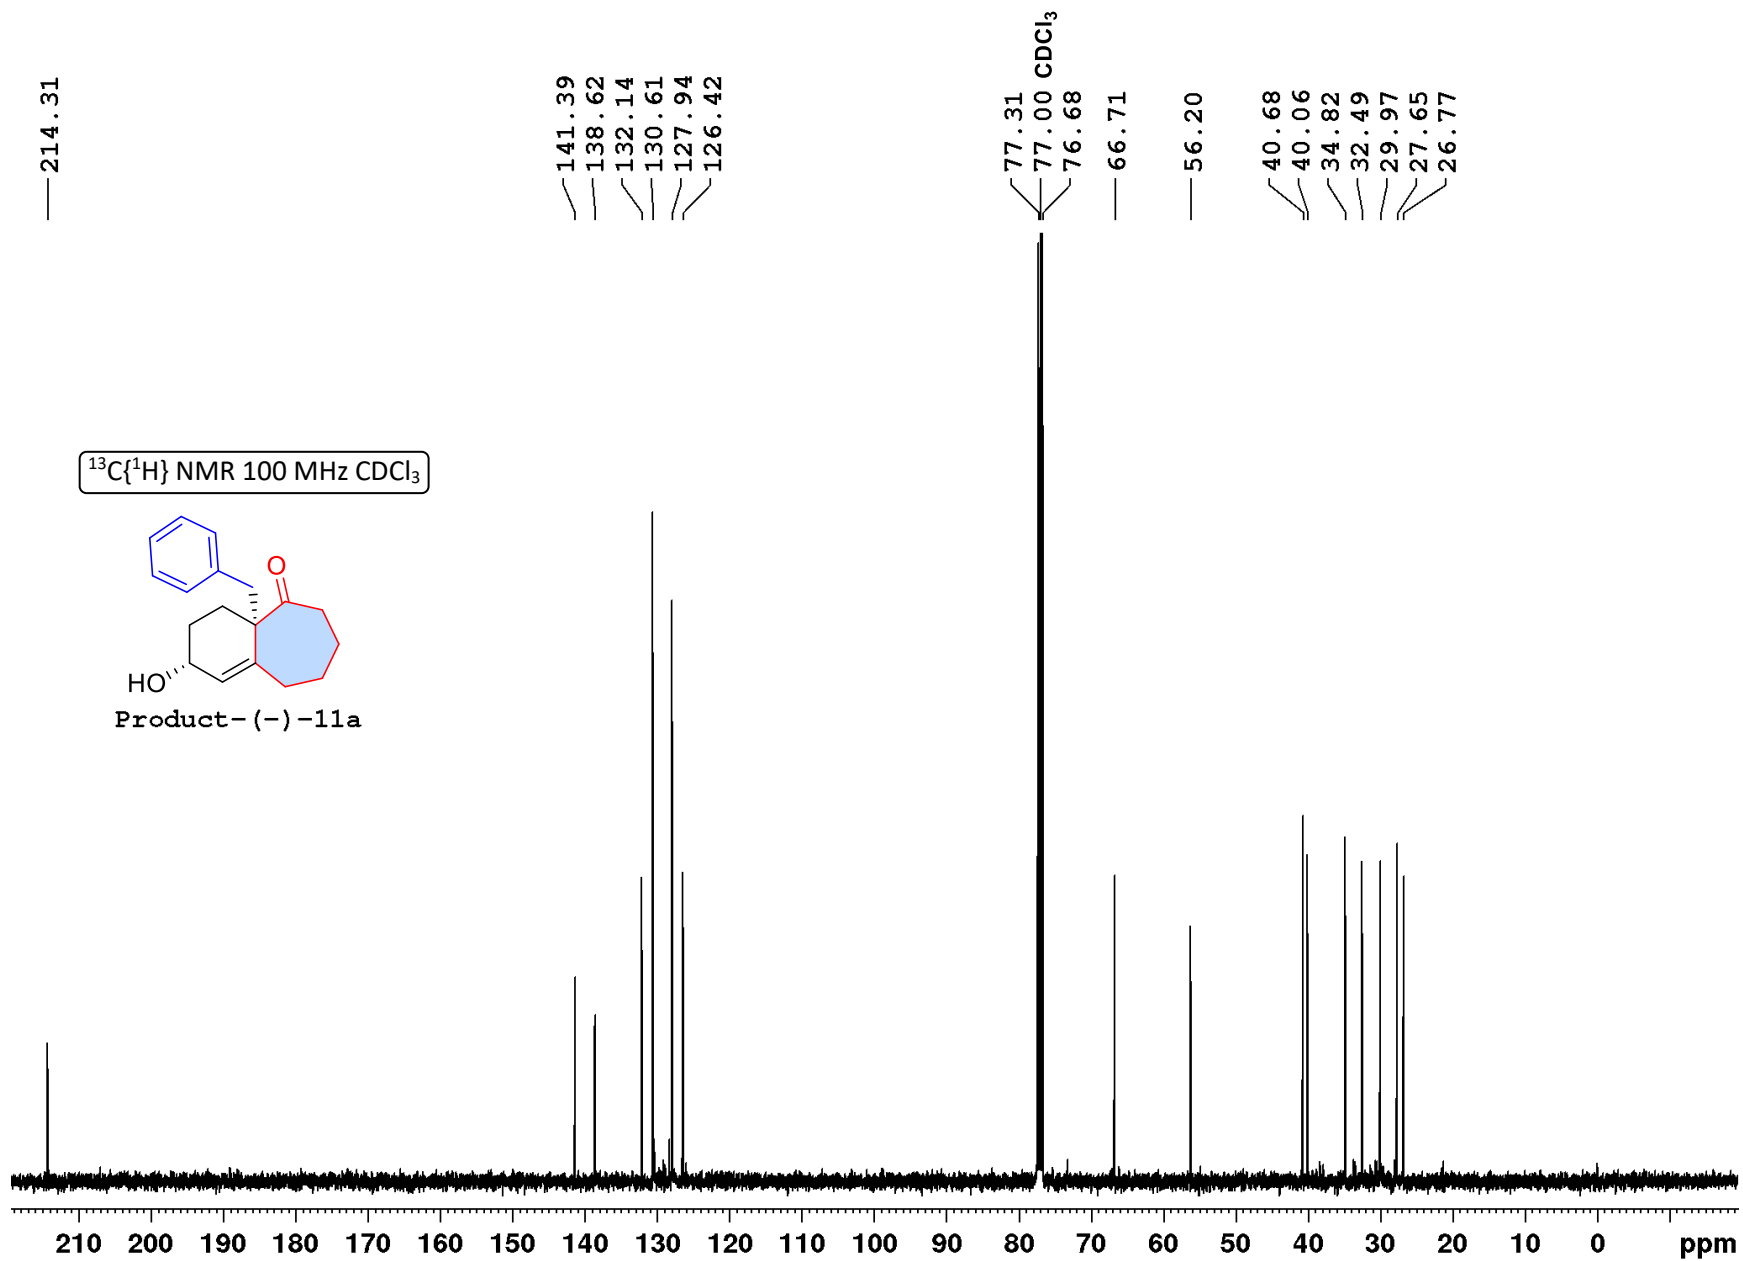

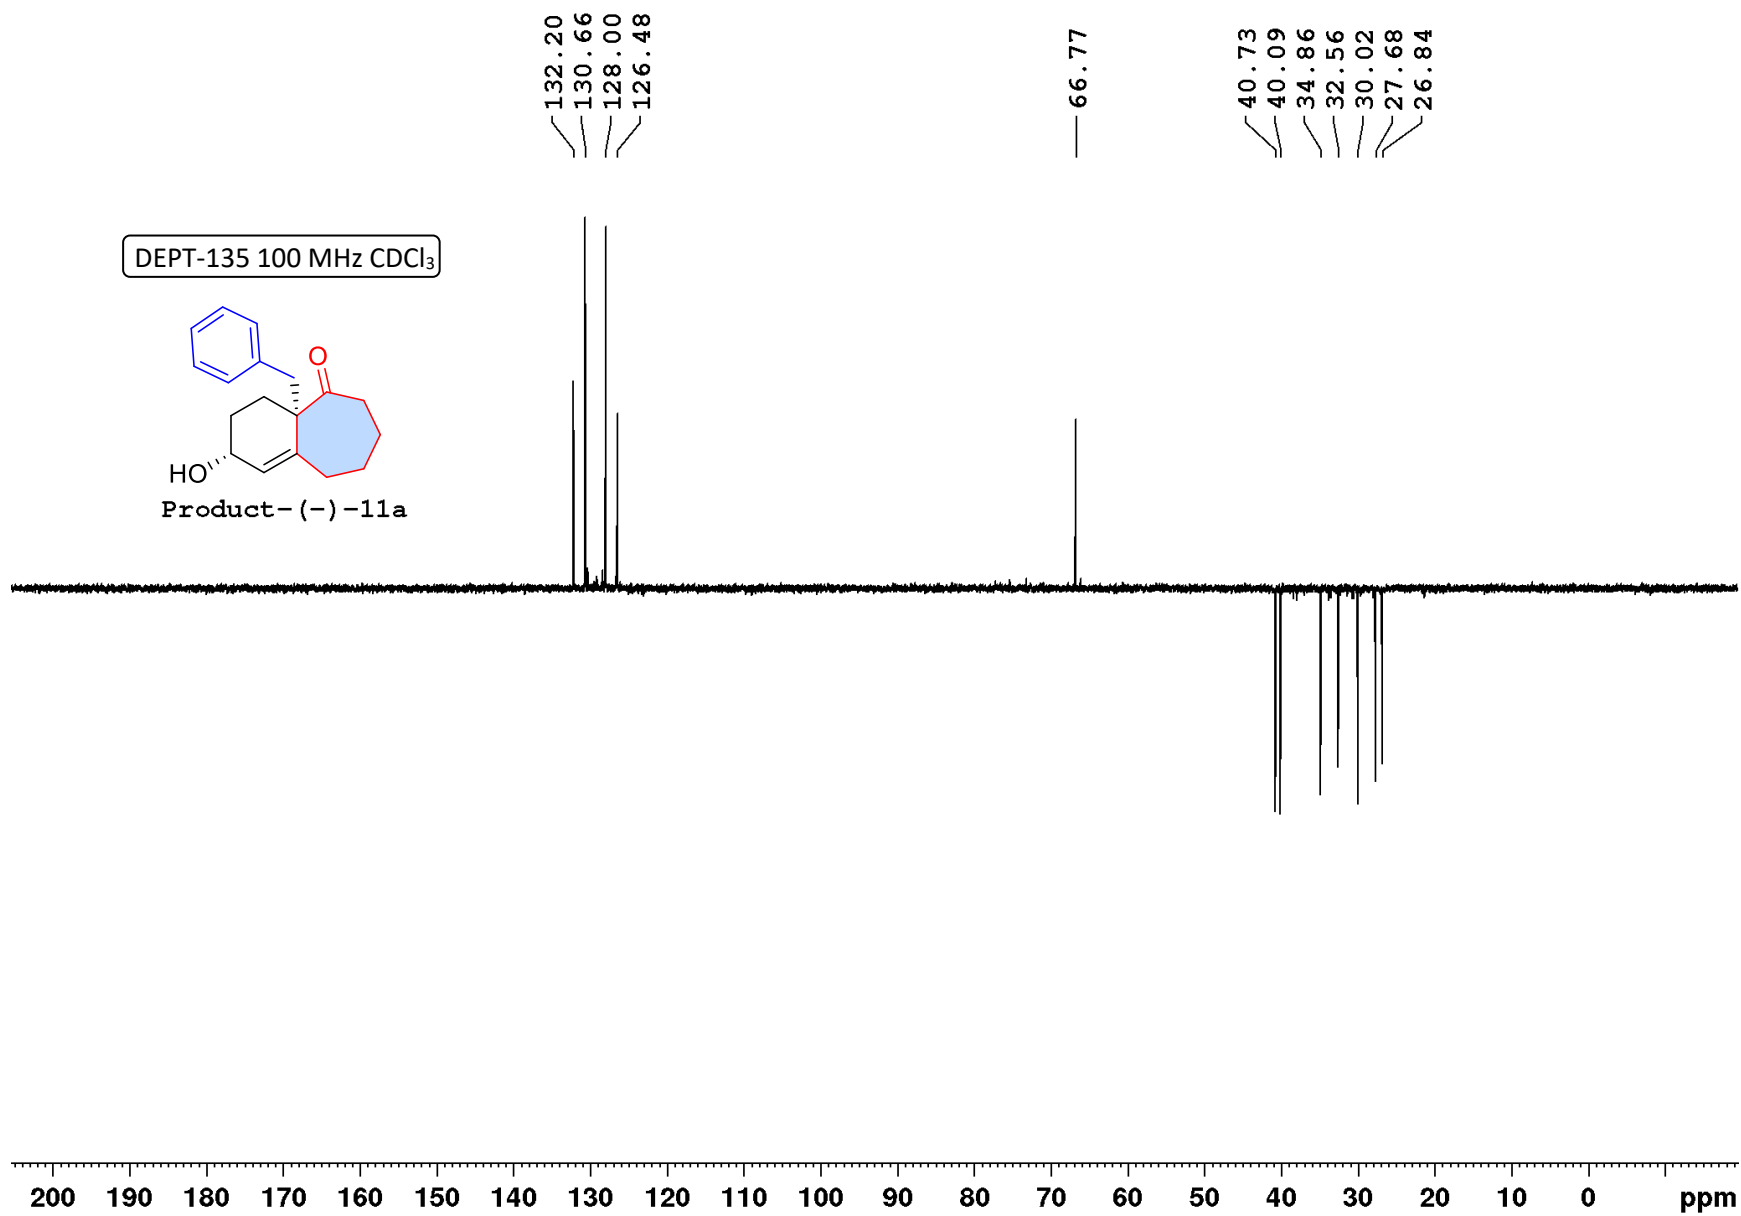

7.305  
 7.301  
 7.287  
 7.284  
 7.276  
 7.273  
 7.269  
 7.267  
 7.264  
 7.261CDCl<sub>3</sub>  
 7.255  
 7.250  
 7.060  
 7.057  
 7.053  
 7.044  
 3.257  
 3.229  
 3.088  
 3.060  
 2.978  
 2.966  
 2.949  
 2.937  
 2.508  
 2.496  
 2.494  
 2.482  
 2.469  
 2.463  
 2.445  
 2.440  
 2.331  
 2.328  
 2.327  
 2.270  
 2.266  
 2.263  
 2.259  
 2.251  
 2.242  
 2.237  
 2.234  
 2.230  
 2.056  
 1.997  
 1.987  
 1.972  
 1.962  
 1.848  
 1.784  
 1.722  
 1.709  
 1.694  
 1.680  
 1.443  
 1.420  
 1.401

<sup>1</sup>H NMR 500 MHz CDCl<sub>3</sub>

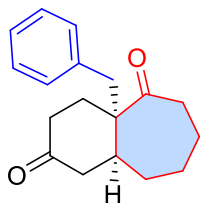

Product-(+)-12a

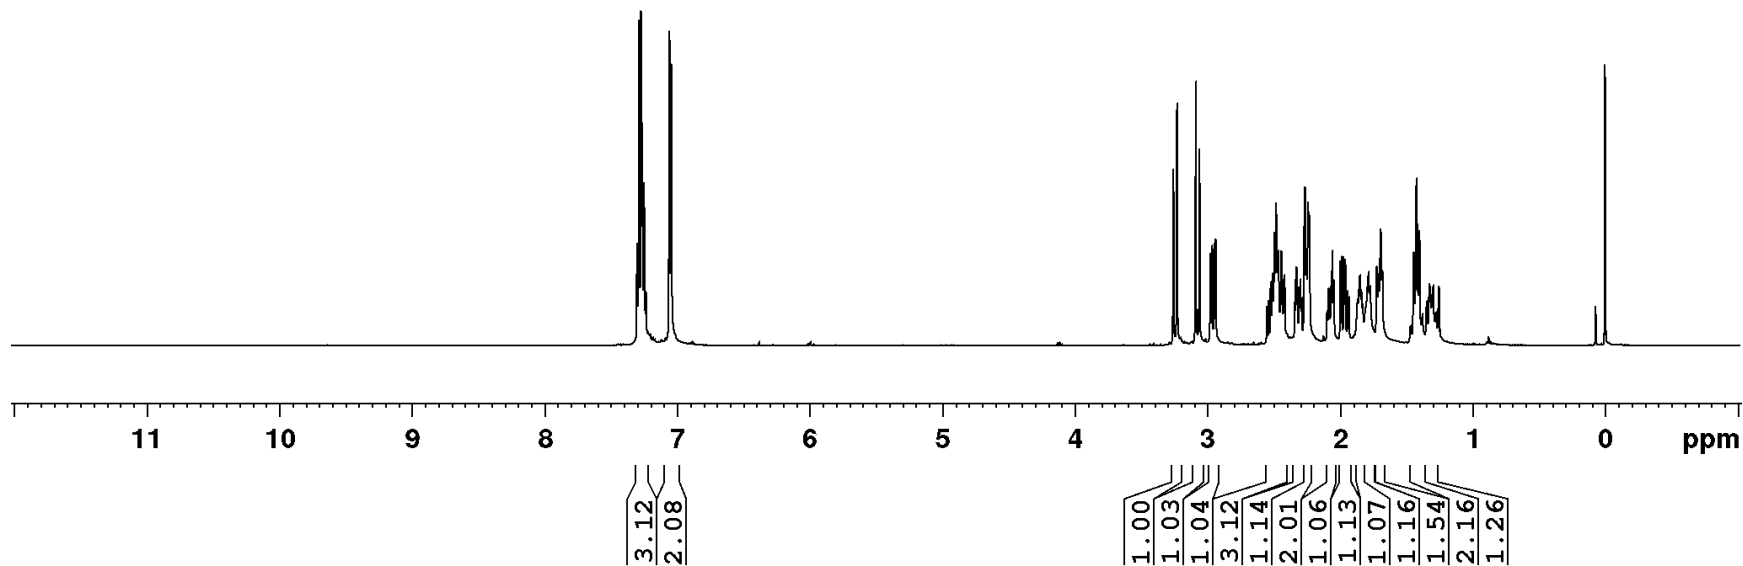

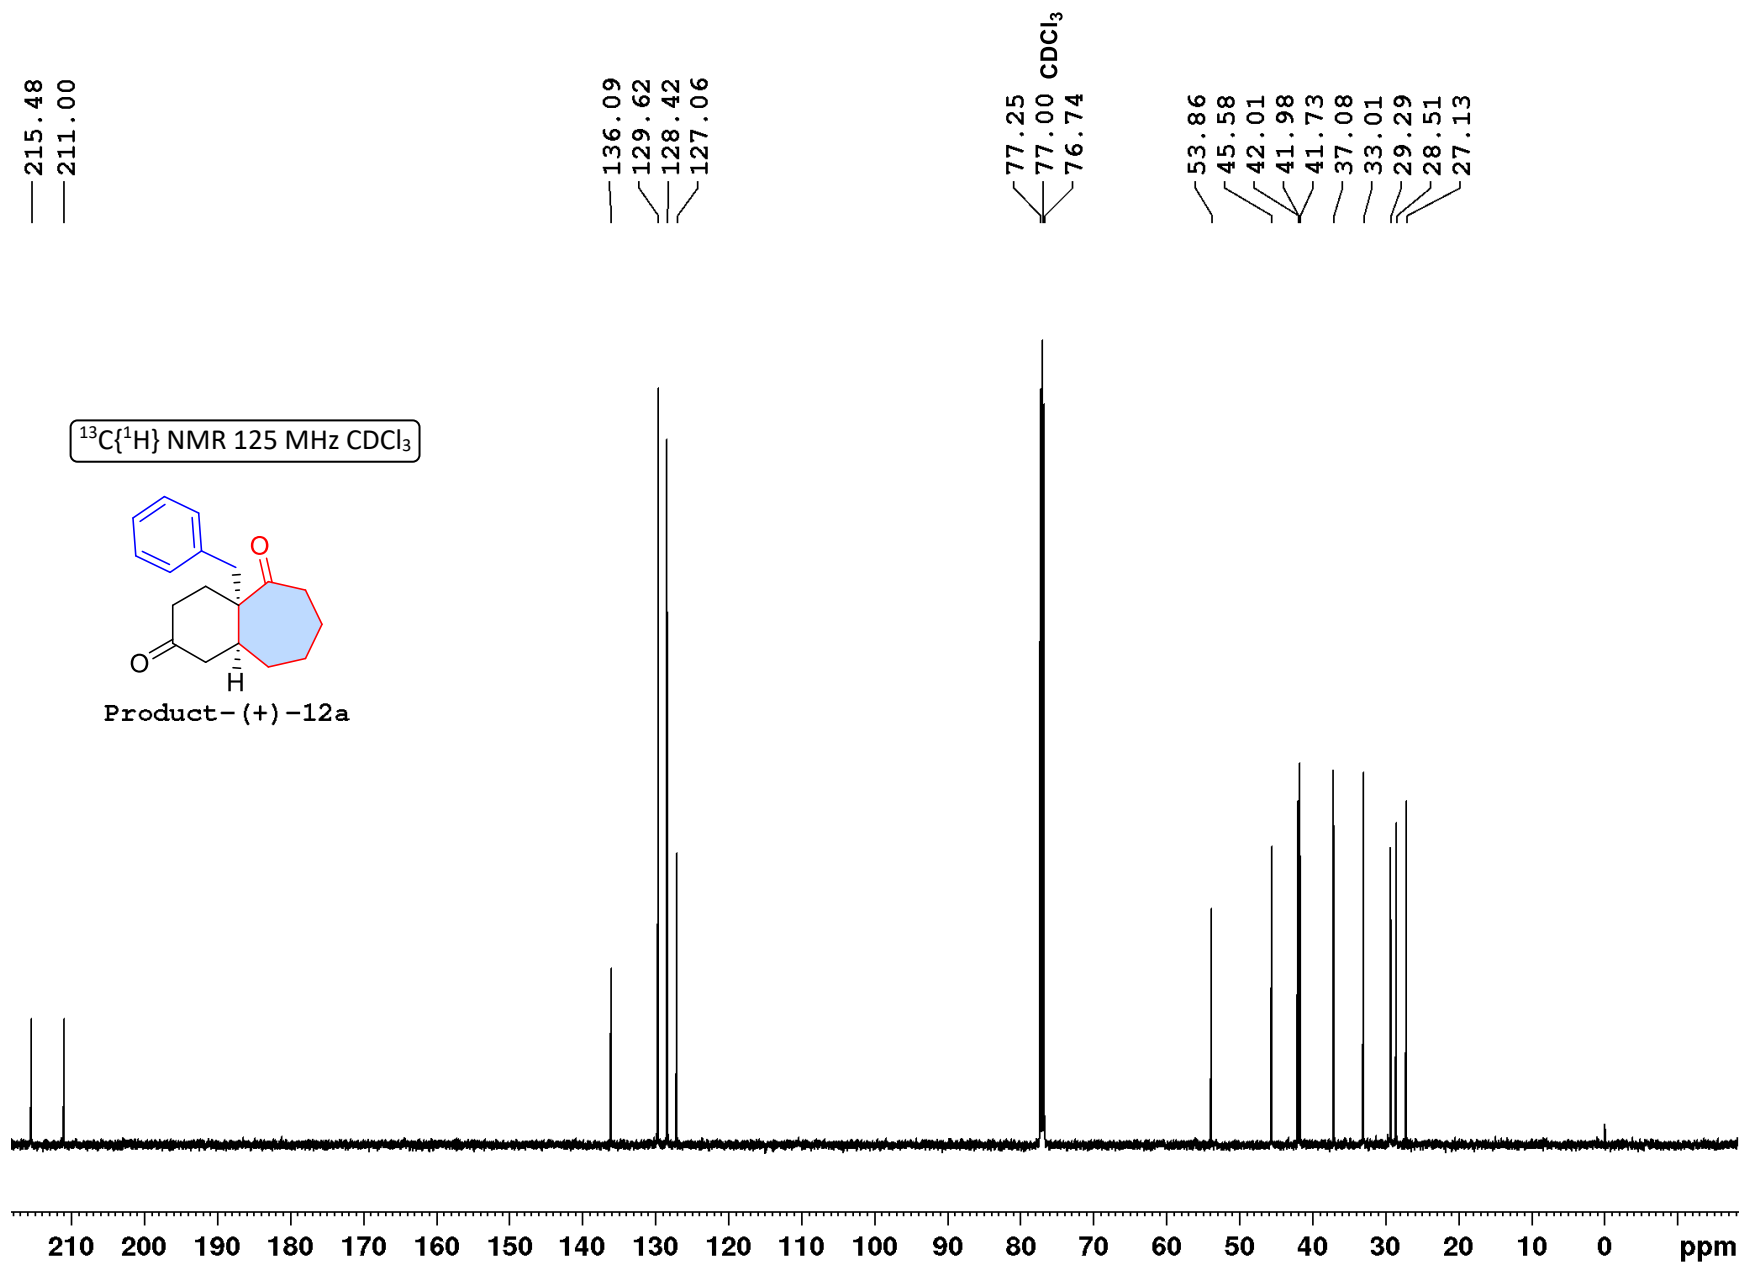

DEPT-135 125 MHz CDCl<sub>3</sub>

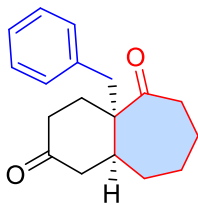

Product-(+)-12a

129.68  
128.48  
127.11

45.64  
42.08  
42.04  
41.79  
37.14  
33.06  
29.34  
28.57  
27.18

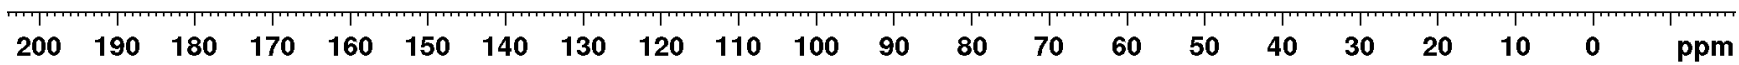



7.390  
7.375  
7.260 CDCl<sub>3</sub>  
7.239  
7.225  
7.209  
7.184  
7.169  
4.321  
4.316  
4.311  
4.305  
3.331  
3.305  
2.692  
2.689  
2.675  
2.667  
2.663  
2.648  
2.488  
2.484  
2.481  
2.466  
1.680  
1.671  
1.509  
1.501  
1.486  
1.479  
1.472  
1.458  
1.449  
1.392  
1.385  
1.379  
1.371  
1.356  
1.350  
1.340  
1.330  
1.312  
1.305  
1.296  
1.289  
1.283  
1.278  
1.221  
1.217  
1.191  
1.186  
0.938  
0.928  
0.917  
0.409  
0.399  
0.392  
0.381

<sup>1</sup>H NMR 500 MHz CDCl<sub>3</sub>

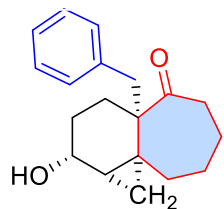

Product-(-)-13a

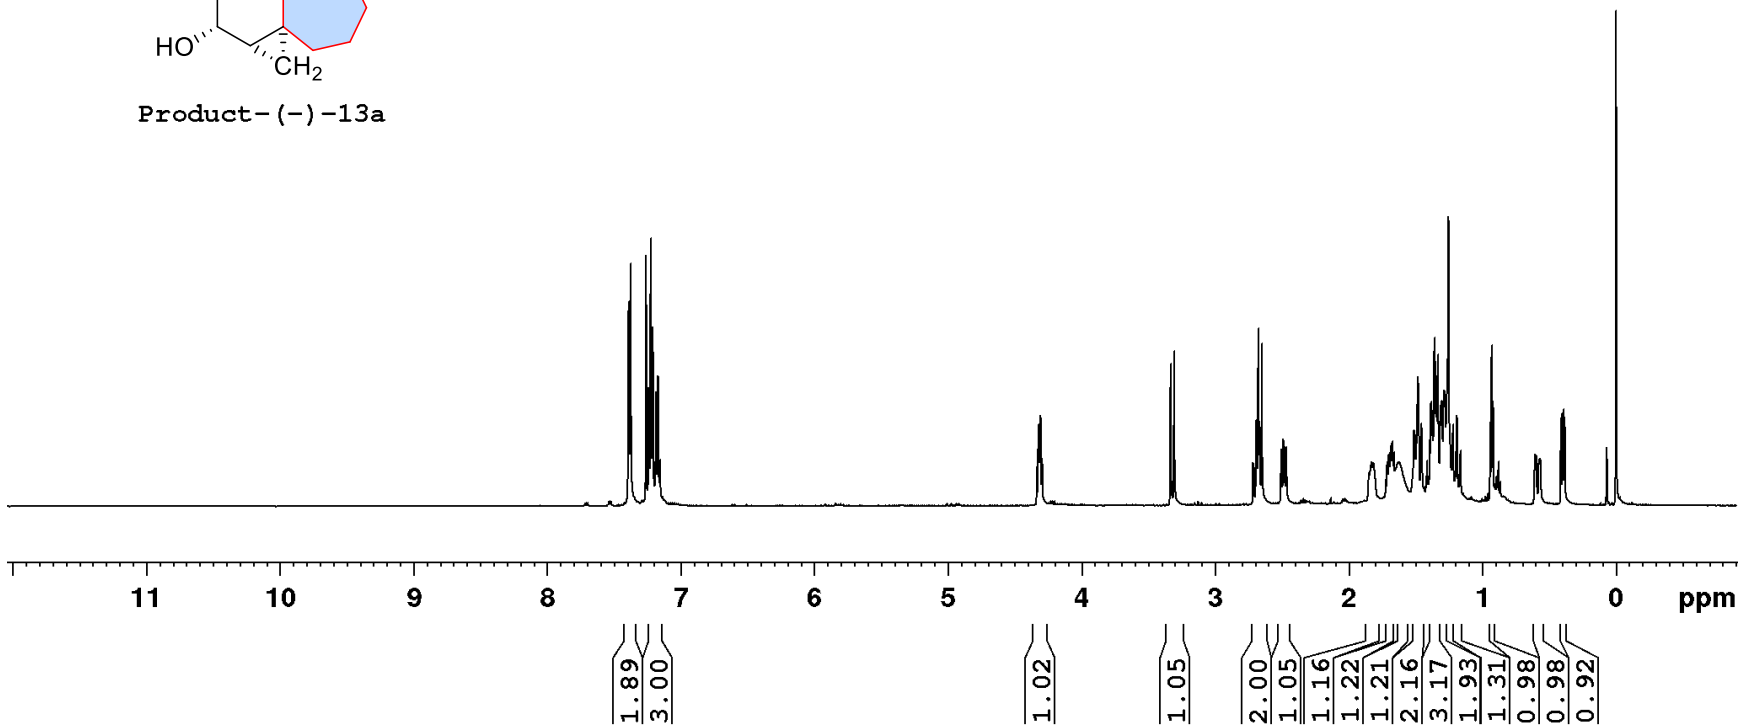

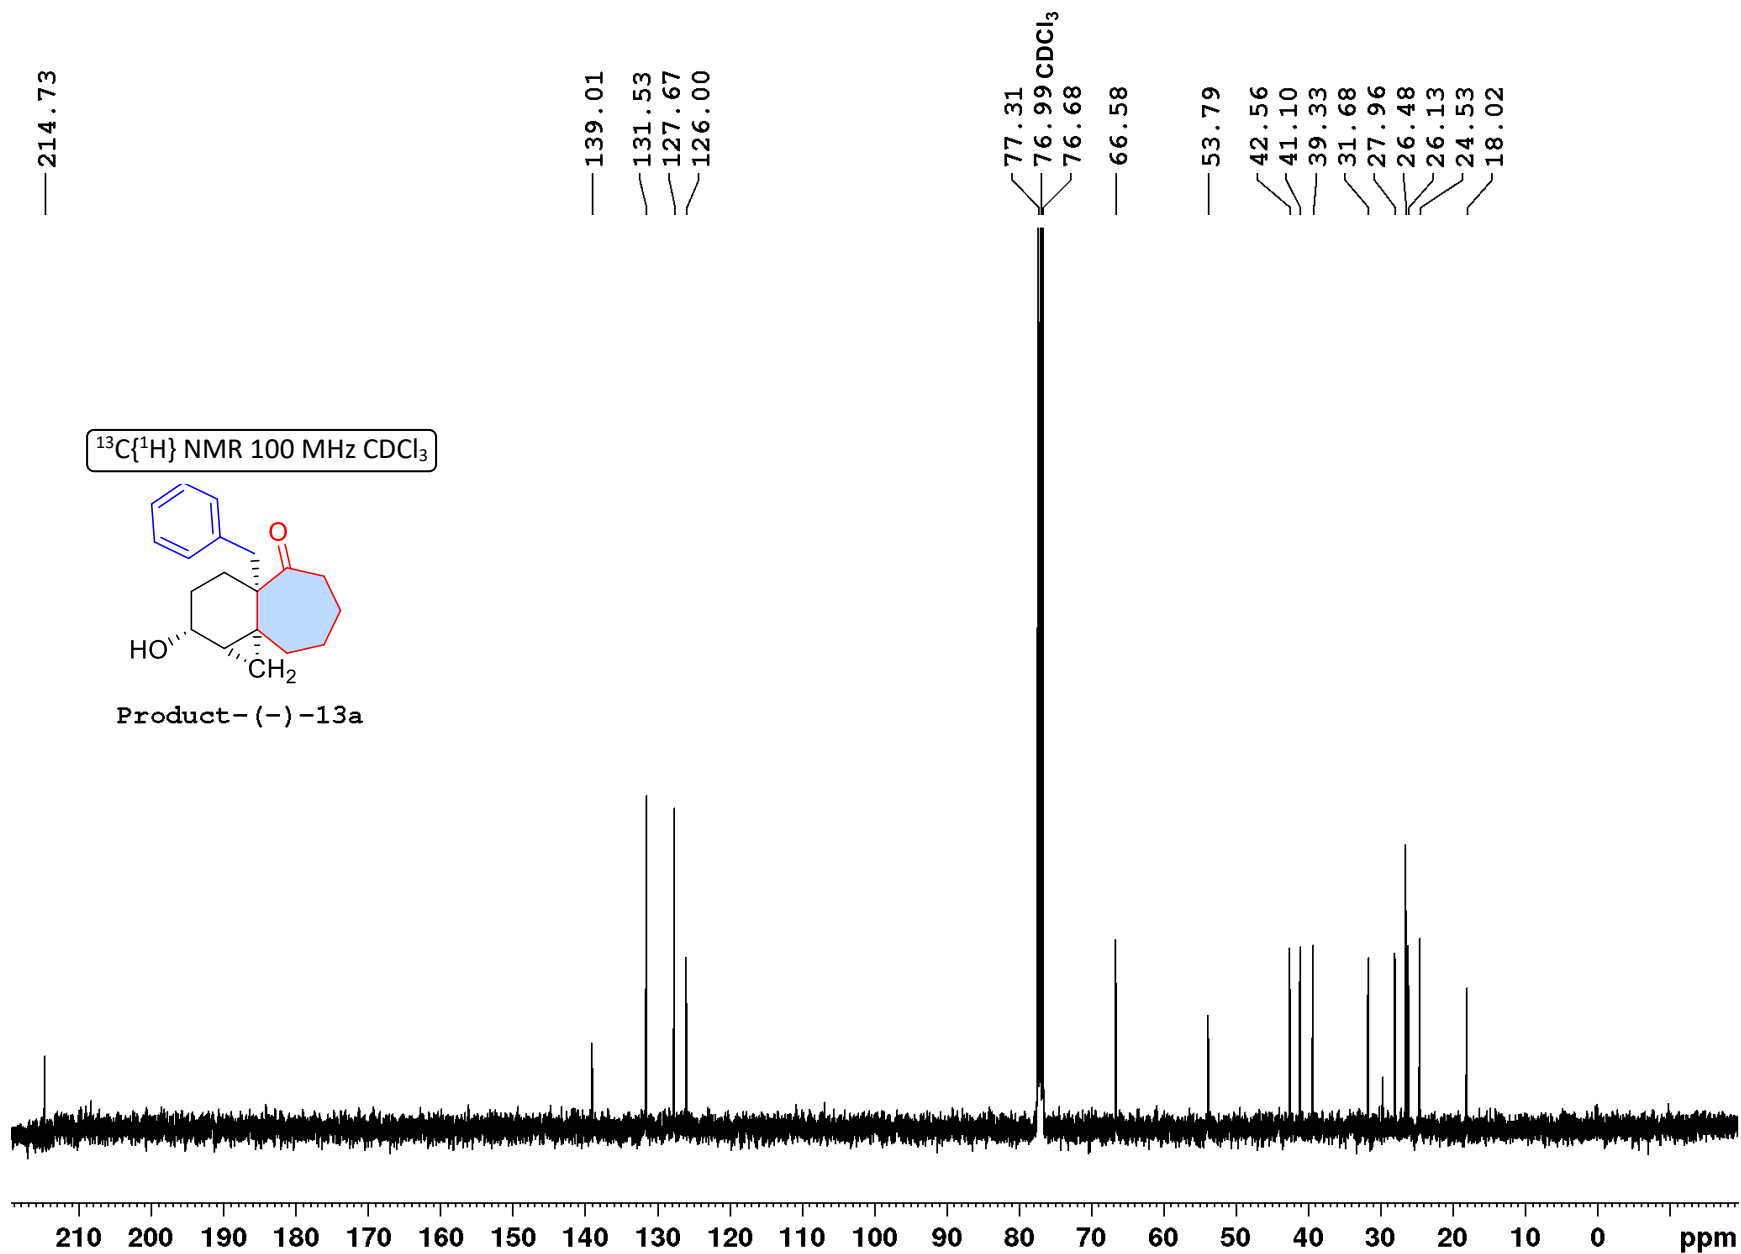

DEPT-135 100 MHz CDCl<sub>3</sub>

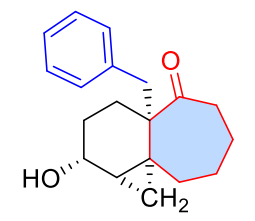

131.56  
127.71  
126.04

66.64

42.58  
41.11  
39.37  
31.73  
28.00  
26.50  
26.18  
24.55  
18.07

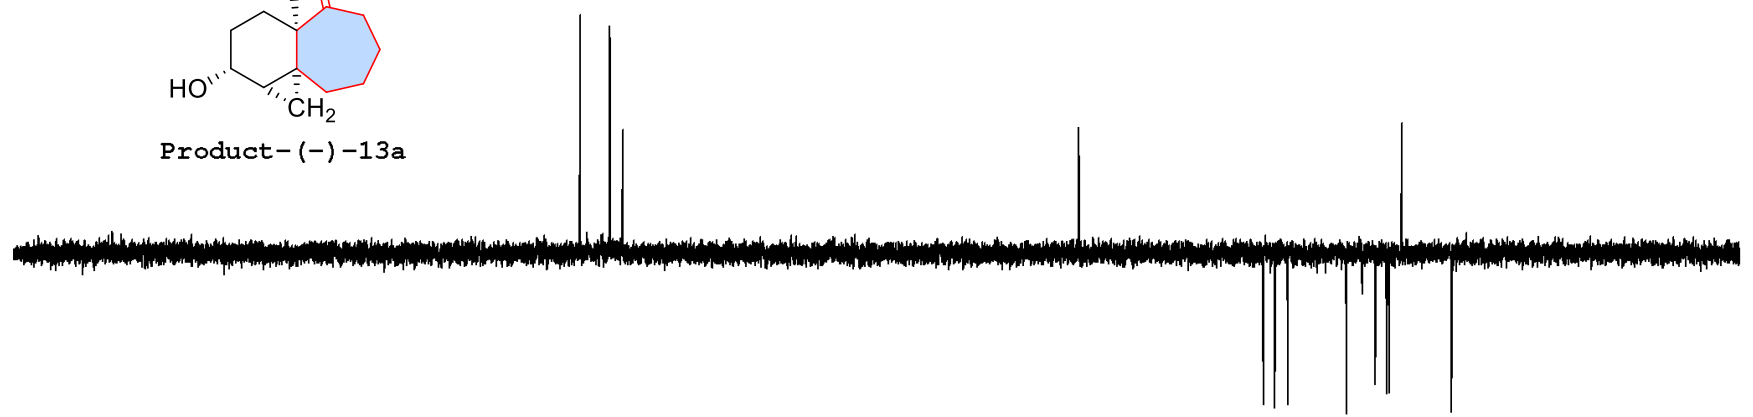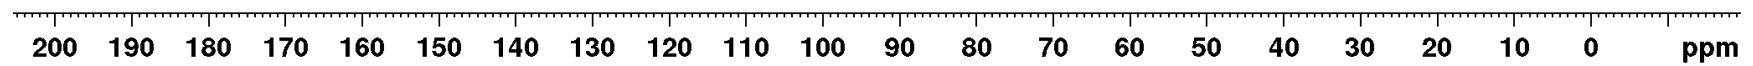

7.523  
7.520  
7.506  
7.260 CDCl<sub>3</sub>  
7.249  
7.235  
7.232  
7.222  
7.219  
7.188  
7.186  
7.183  
7.171  
4.134  
4.125  
4.114  
3.280  
3.254  
3.175  
2.907  
2.880  
2.589  
2.587  
2.566  
2.482  
2.469  
2.446  
1.752  
1.751  
1.743  
1.742  
1.712  
1.692  
1.686  
1.672  
1.666  
1.606  
1.539  
1.511  
1.504  
1.484  
1.477  
1.394  
1.387  
1.385  
1.379  
1.359  
1.356  
1.351  
1.334  
1.328  
0.959  
0.954  
0.936  
0.930  
0.923  
0.919  
0.912

<sup>1</sup>H NMR 500 MHz CDCl<sub>3</sub>

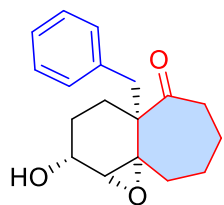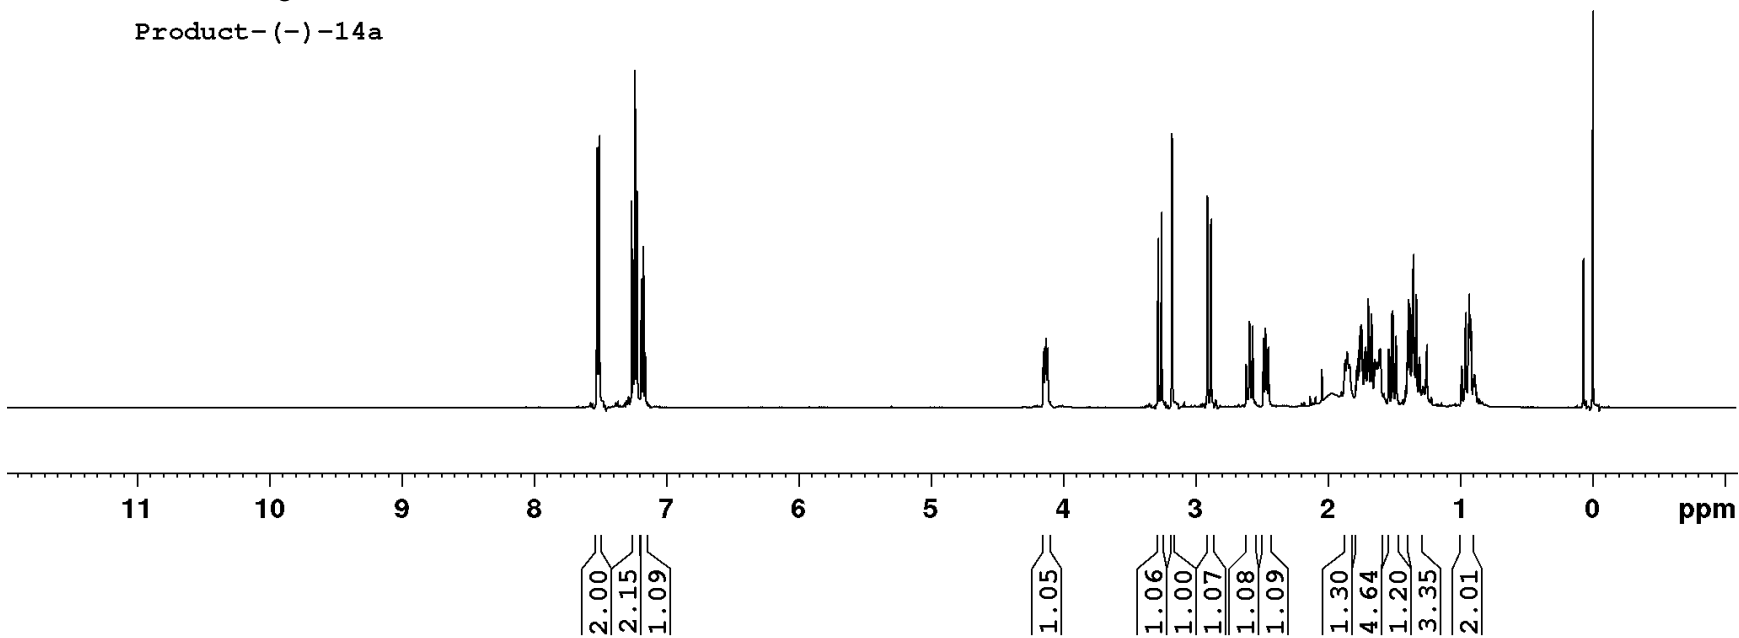

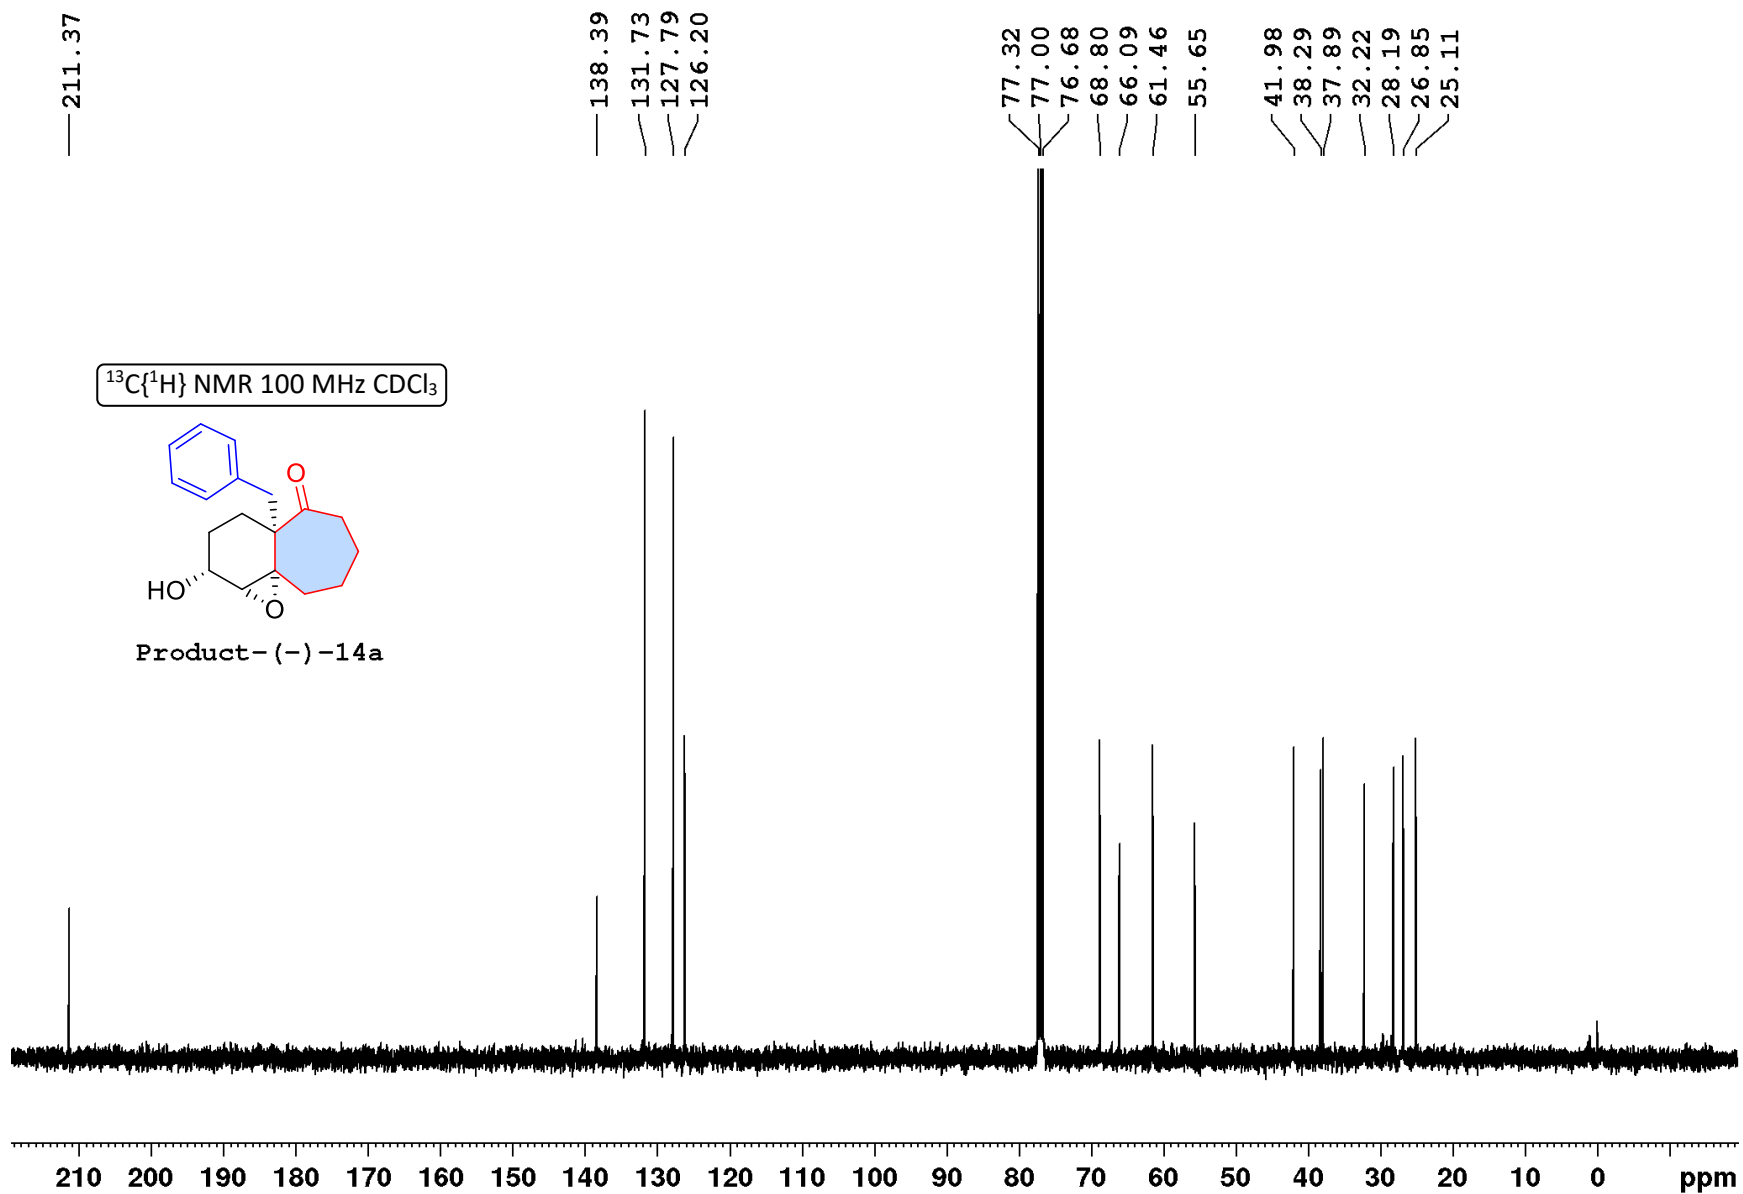

DEPT-135 100 MHz CDCl<sub>3</sub>

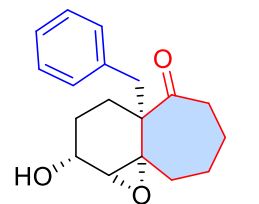

Product-(-)-14a

131.77  
127.84  
126.25

68.84  
61.50

42.02  
38.34  
37.92  
32.27  
28.23  
26.90  
25.13

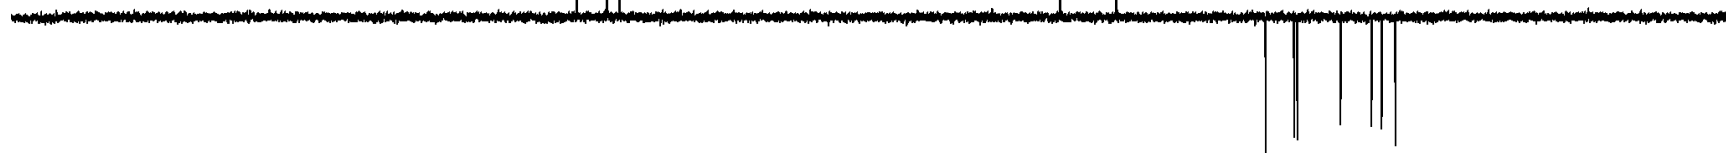

200 190 180 170 160 150 140 130 120 110 100 90 80 70 60 50 40 30 20 10 0 ppm

7.266  
7.263  
7.258CDCl<sub>3</sub>  
7.249  
7.246  
7.237  
7.234  
7.222  
7.219  
7.216  
7.205  
7.021  
7.018  
7.014  
7.005  
4.680  
4.677  
4.626  
4.622  
3.078  
3.051  
3.008  
2.981  
2.400  
2.396  
2.375  
2.233  
2.229  
2.224  
2.151  
2.142  
2.139  
2.127  
2.124  
2.119  
2.104  
2.083  
2.079  
2.074  
2.056  
2.052  
2.047  
1.862  
1.833  
1.830  
1.828  
1.817  
1.749  
1.553  
1.550  
1.543  
1.525  
1.515  
1.508  
1.374  
1.364  
1.356  
1.254

<sup>1</sup>H NMR 500 MHz CDCl<sub>3</sub>

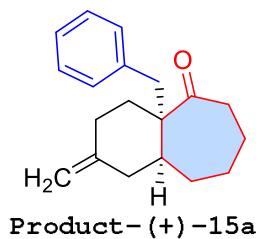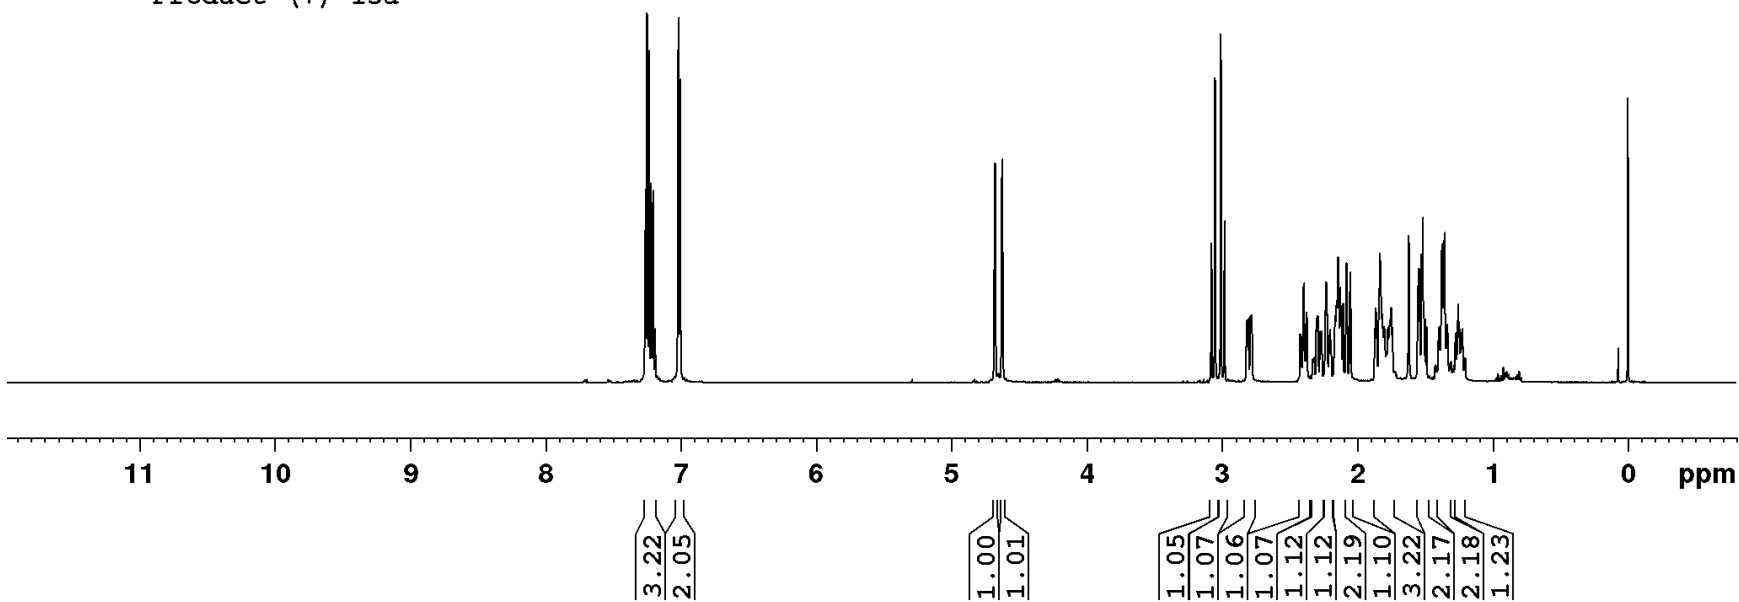

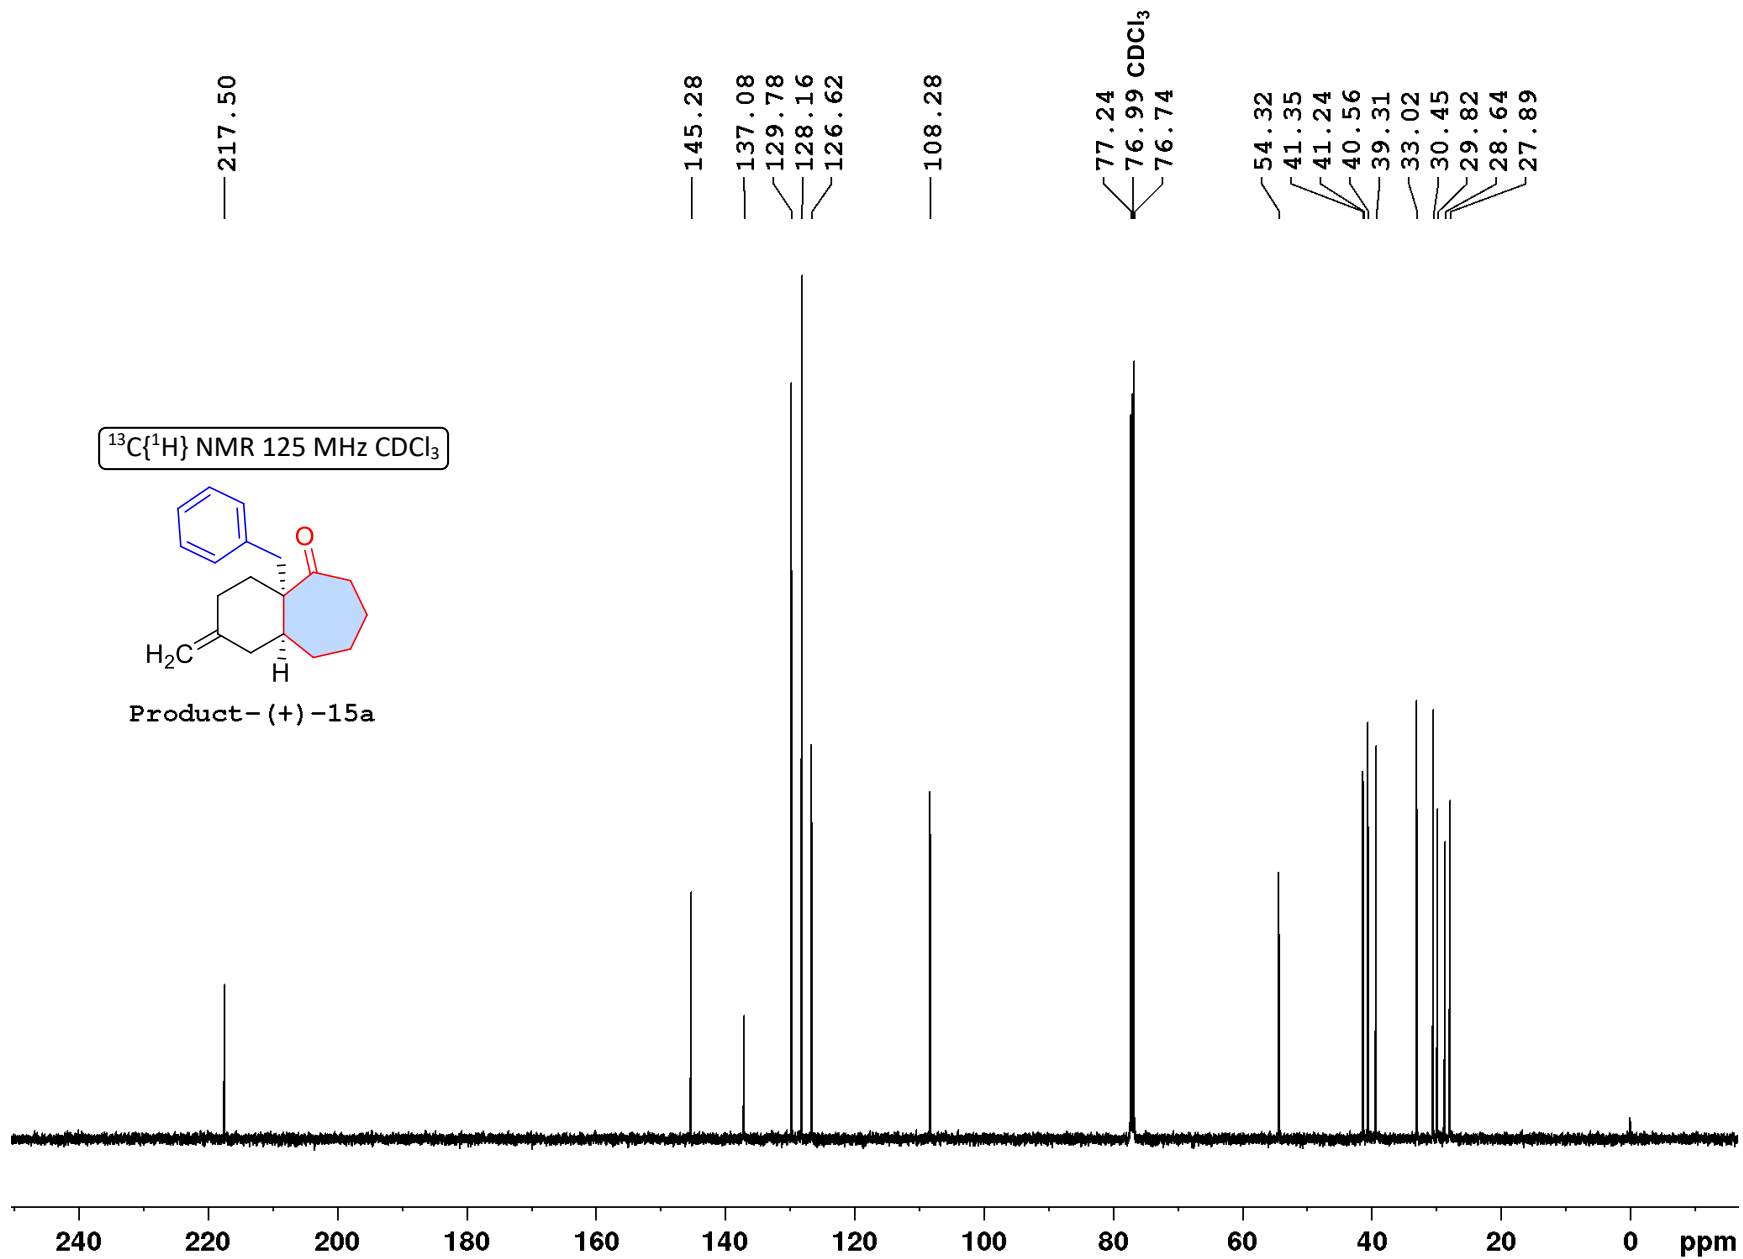



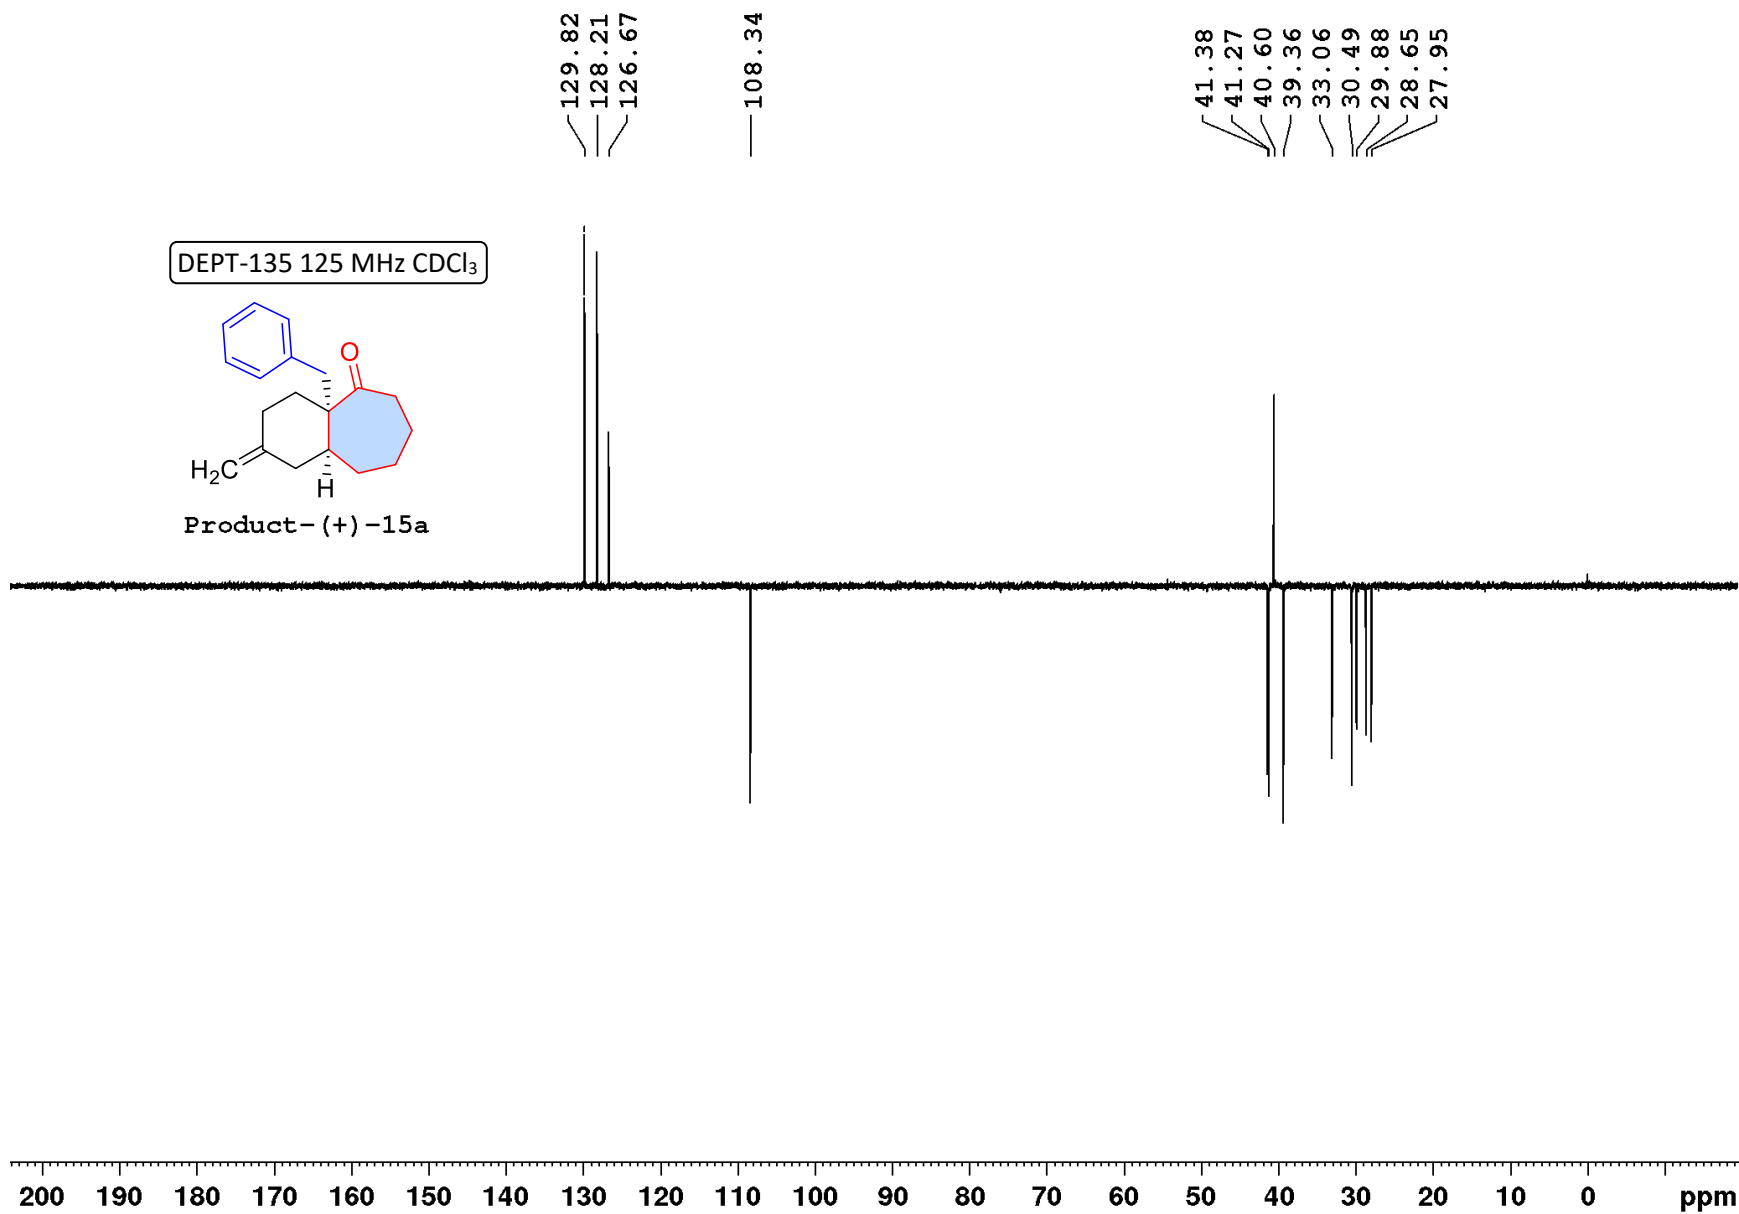

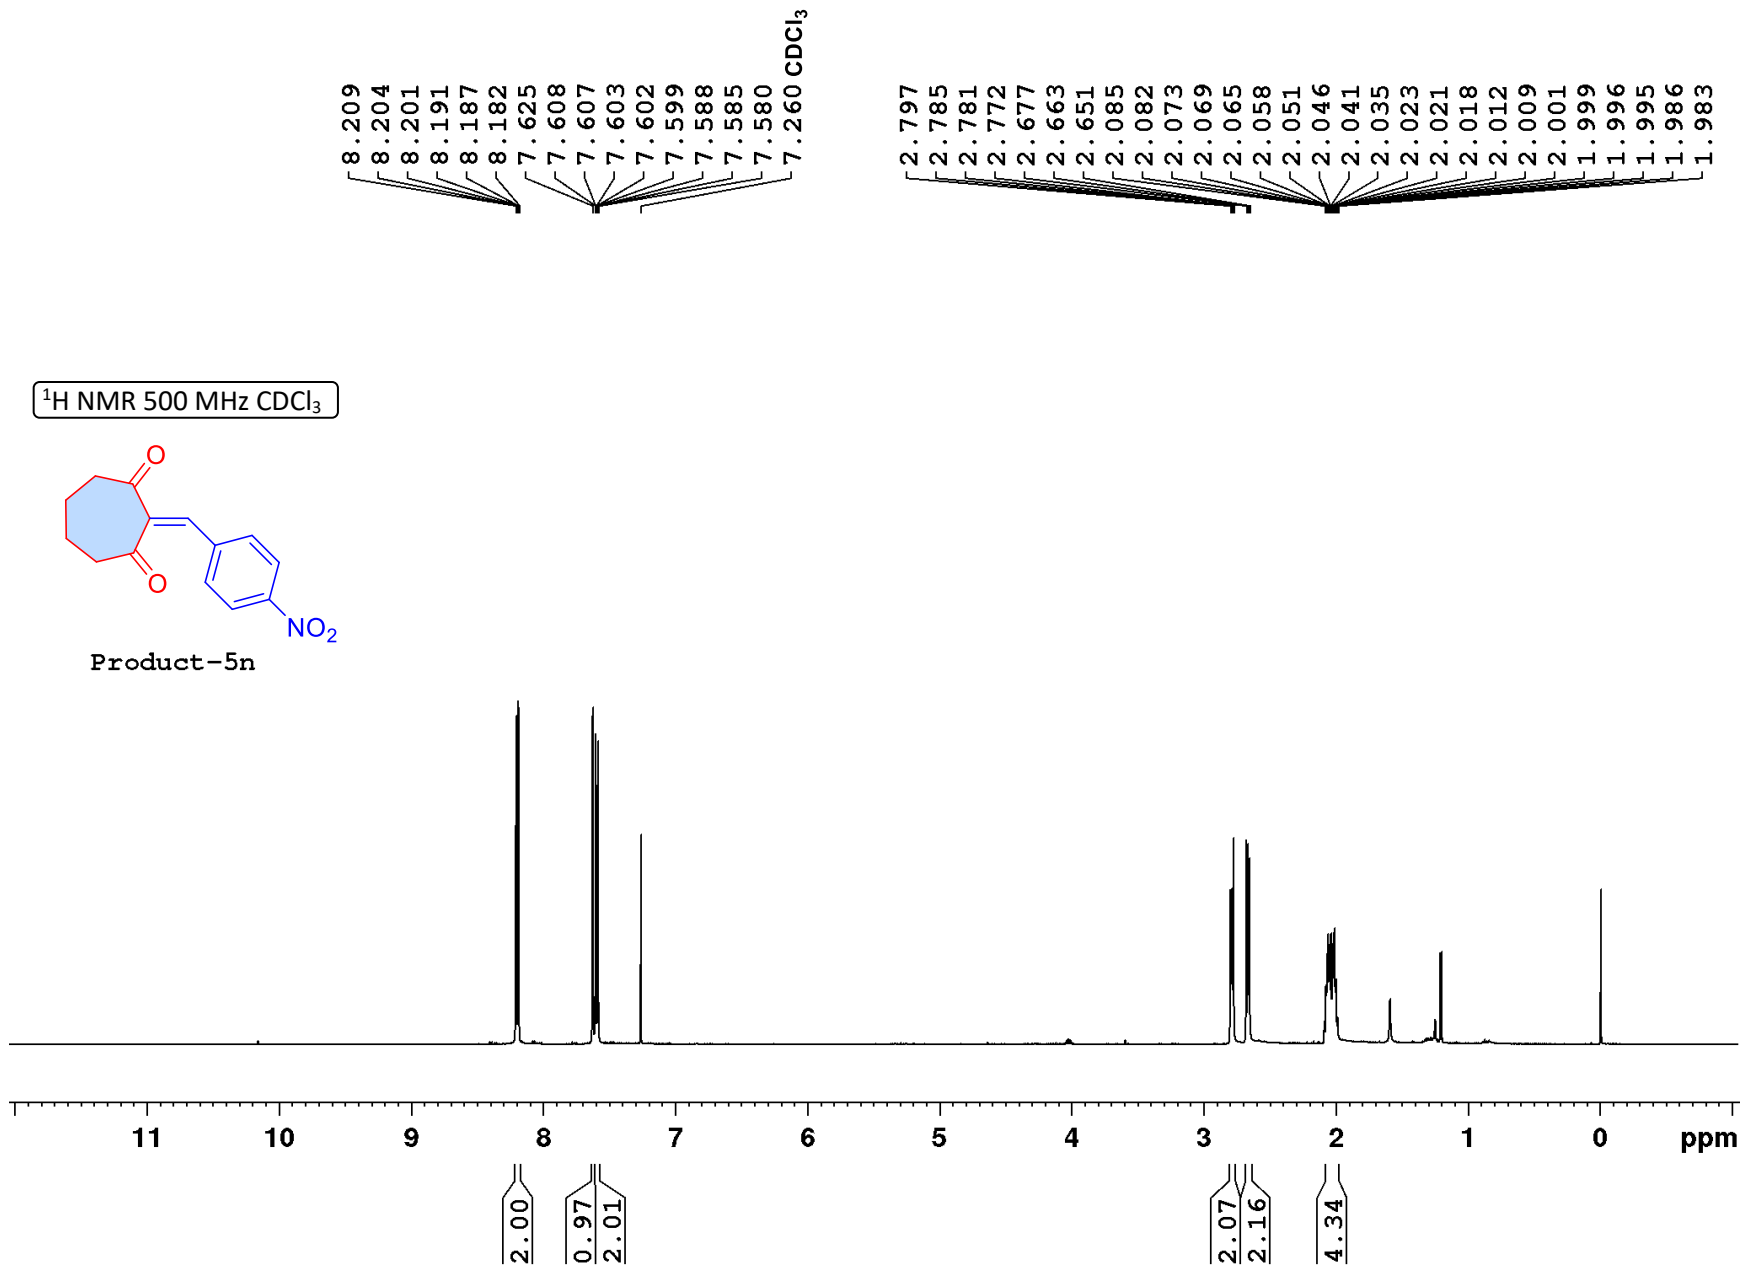

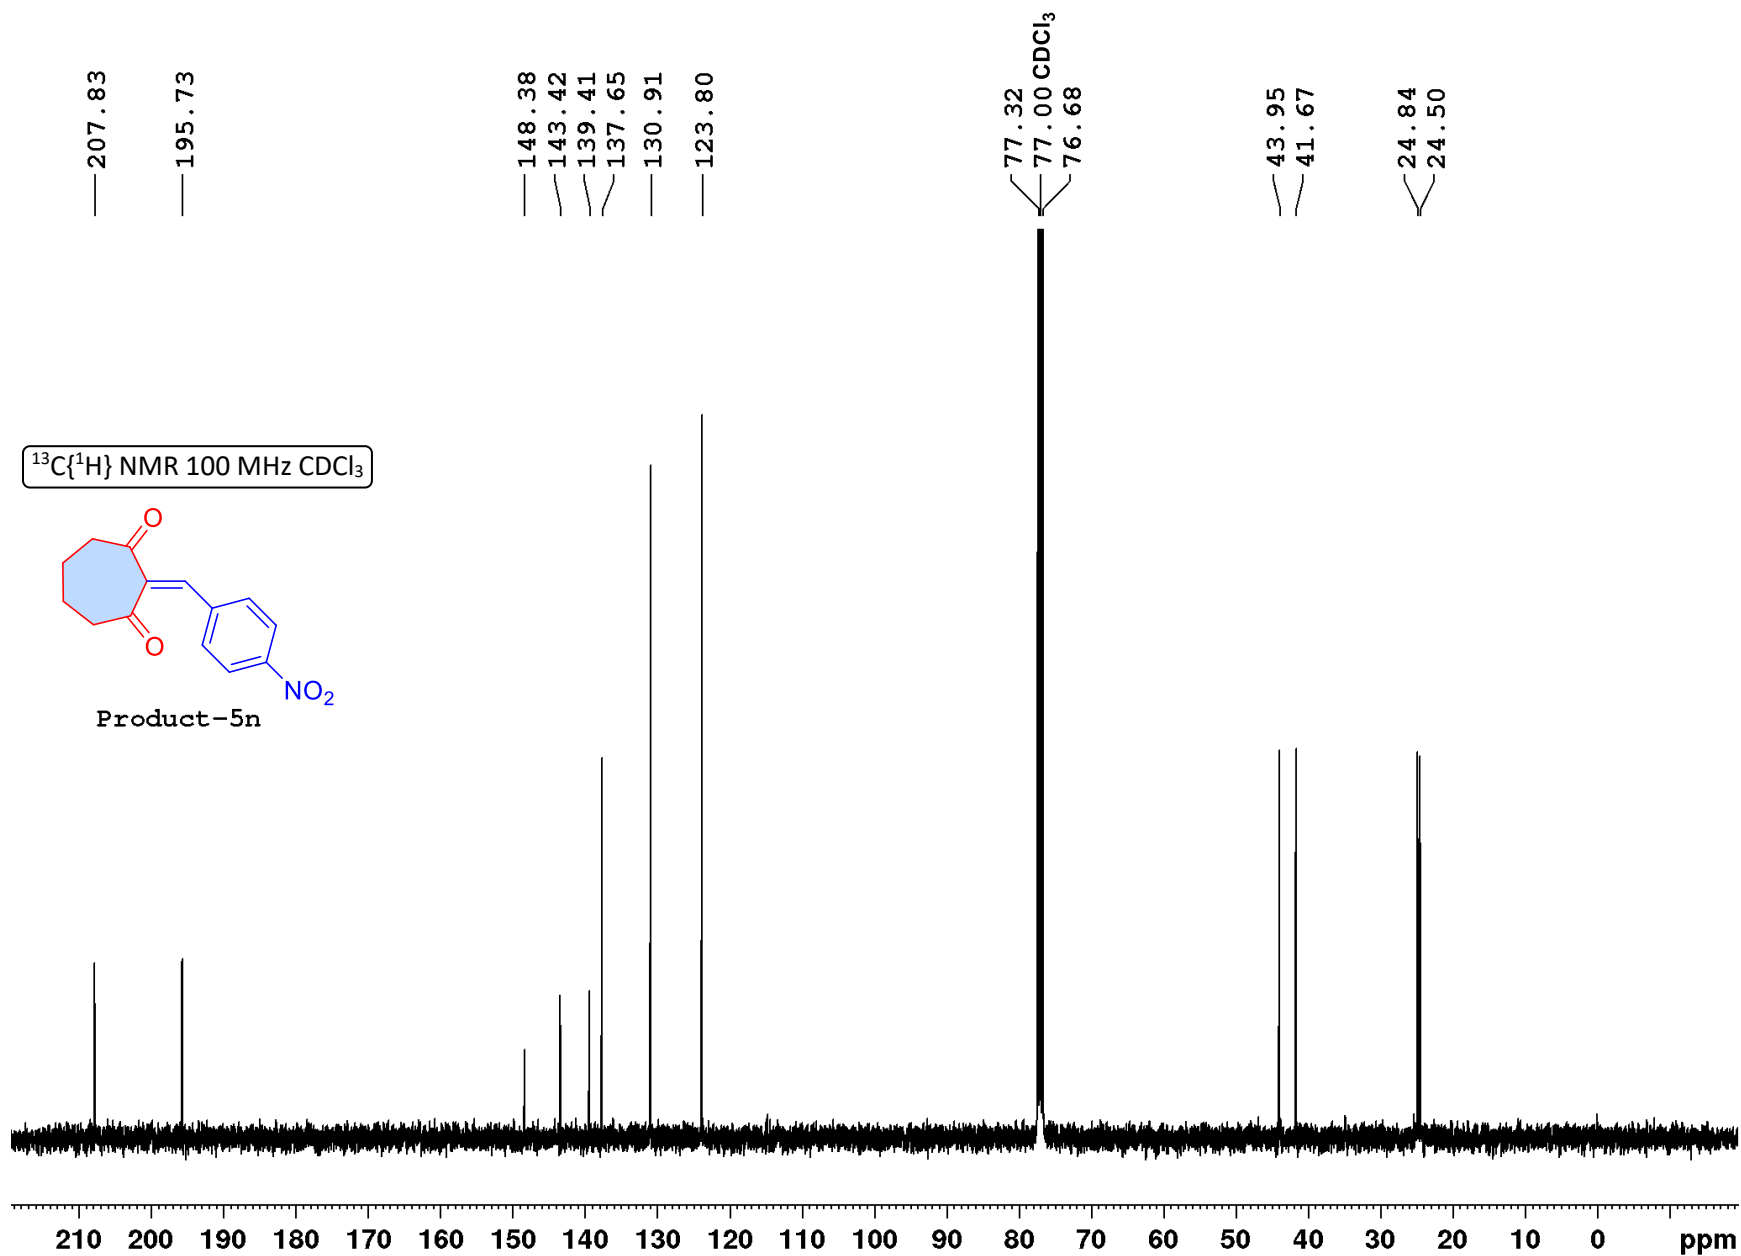

DEPT-135 100 MHz CDCl<sub>3</sub>

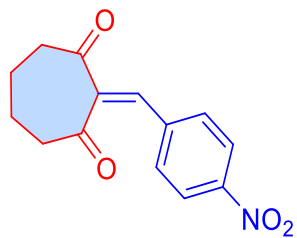

137.688

130.945

123.837

43.977  
41.703

24.867  
24.529

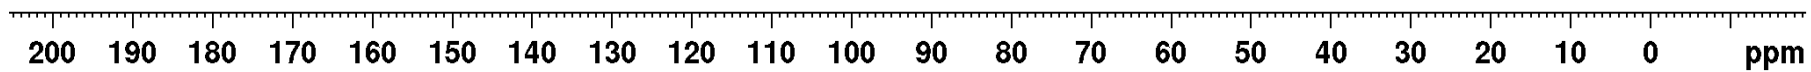

<sup>1</sup>H NMR 500 MHz CDCl<sub>3</sub>

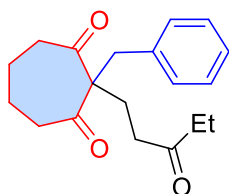

Product-8'a

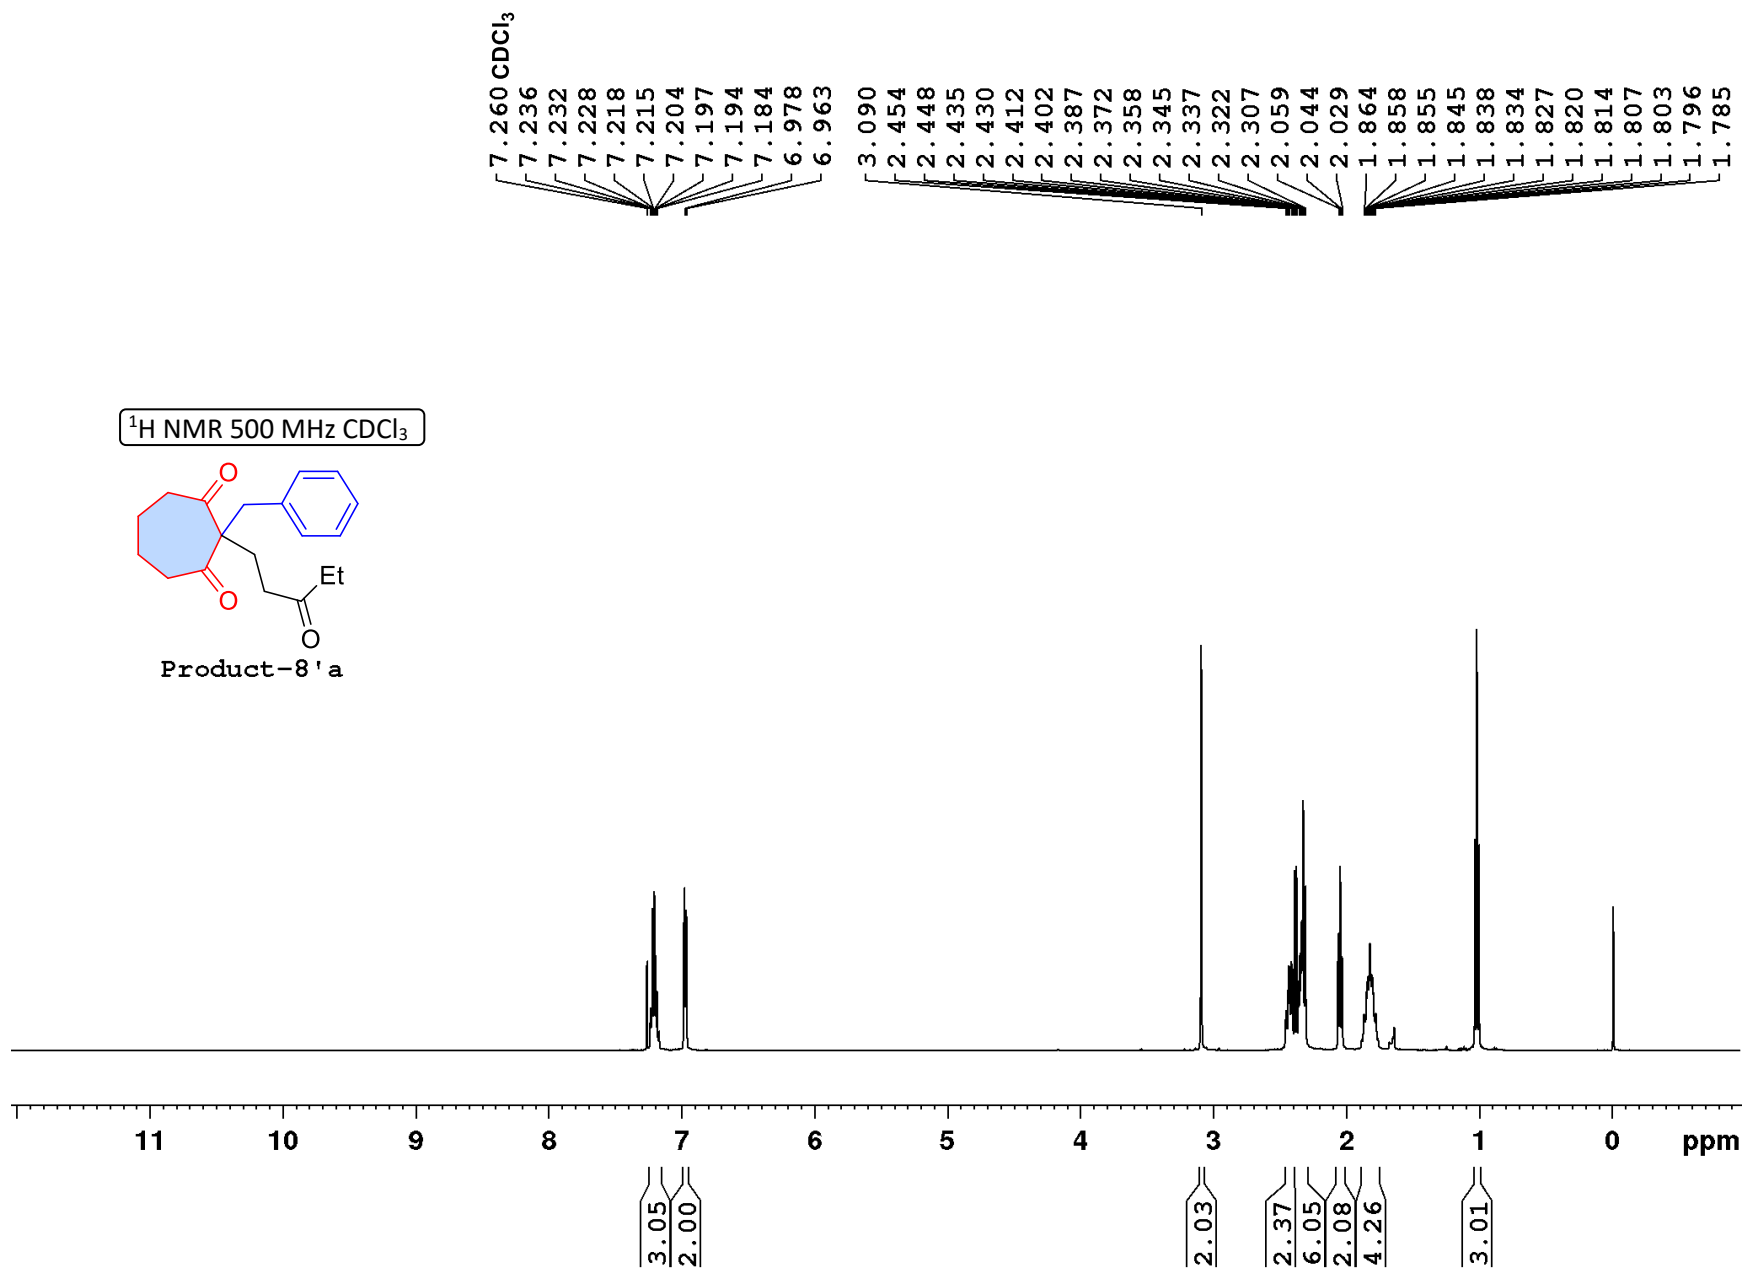

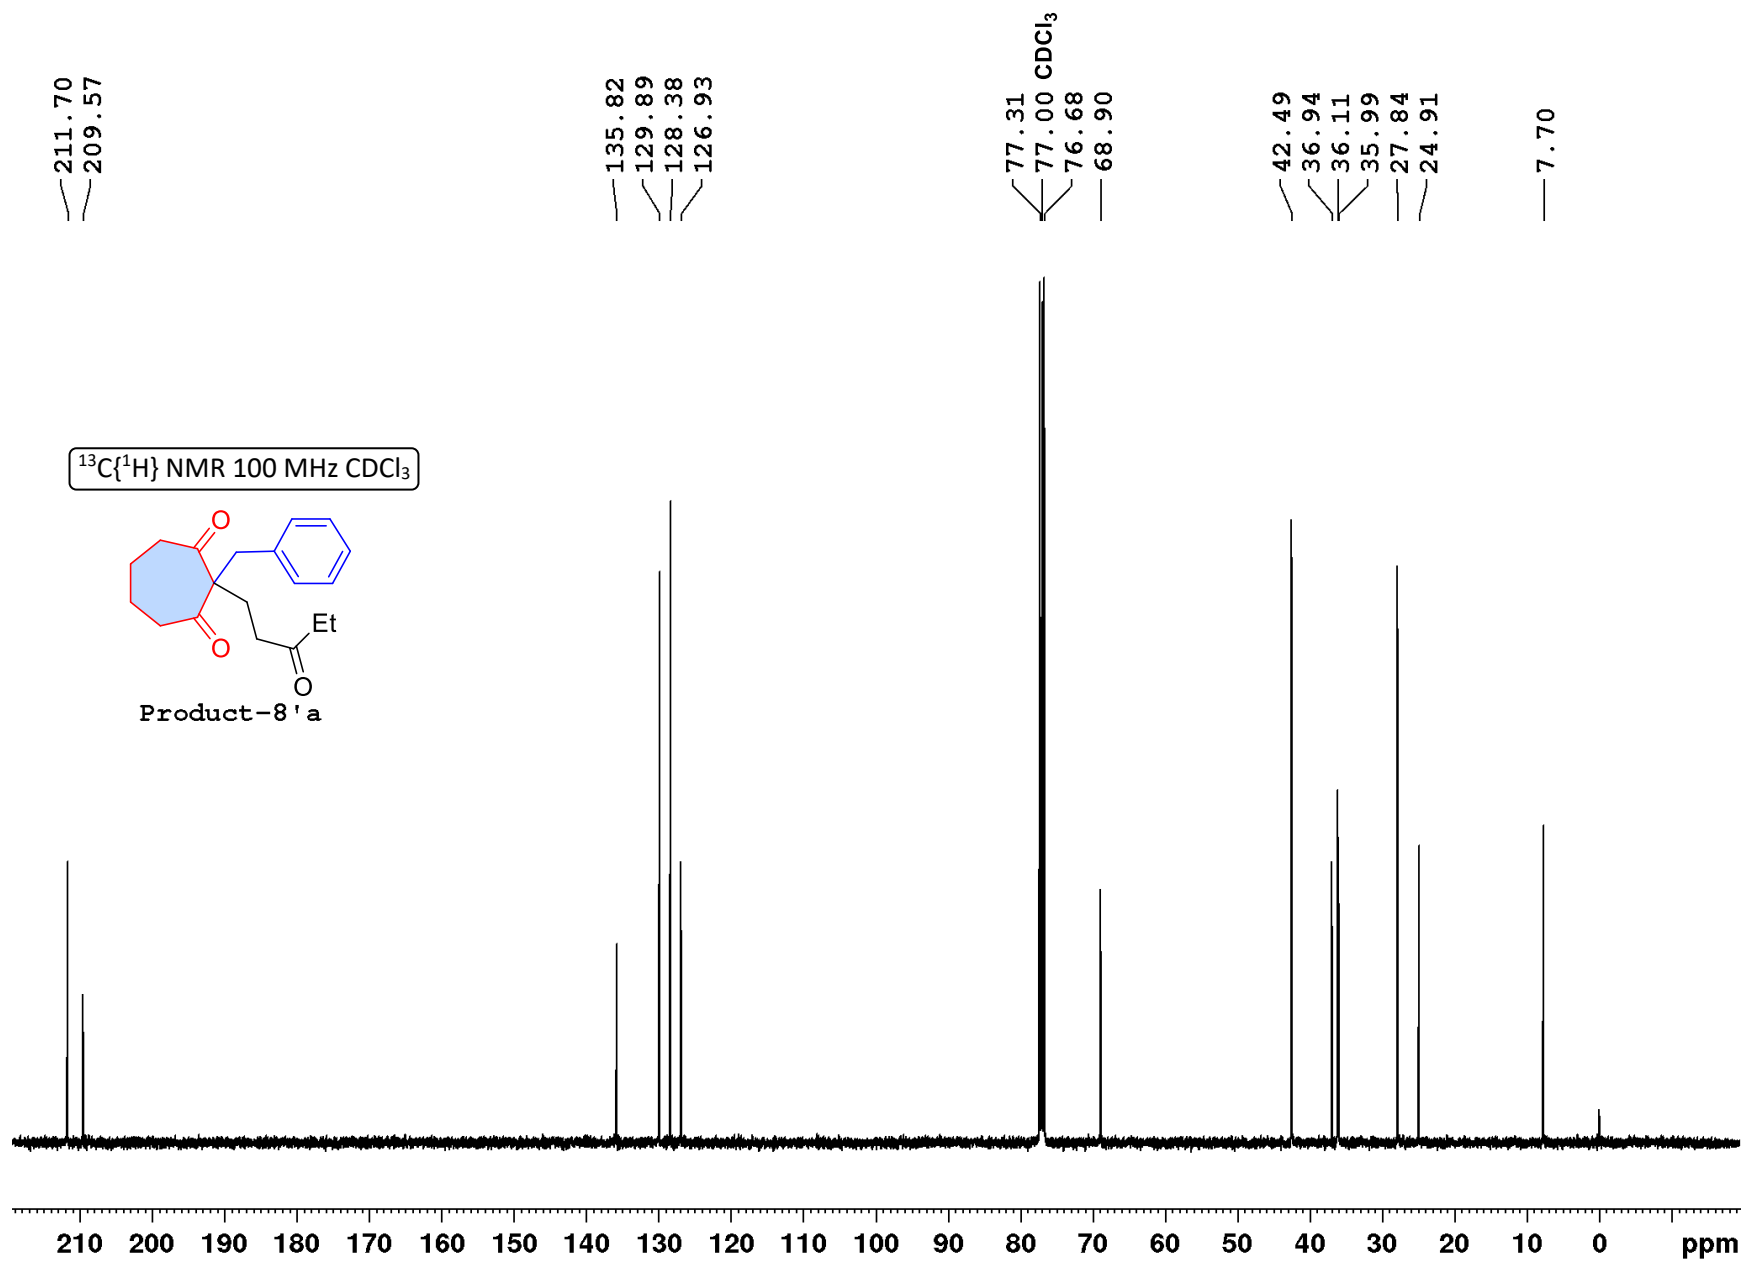

DEPT-135 100 MHz CDCl<sub>3</sub>

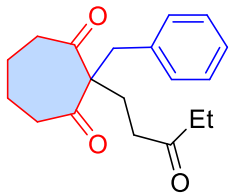

Product-8'a

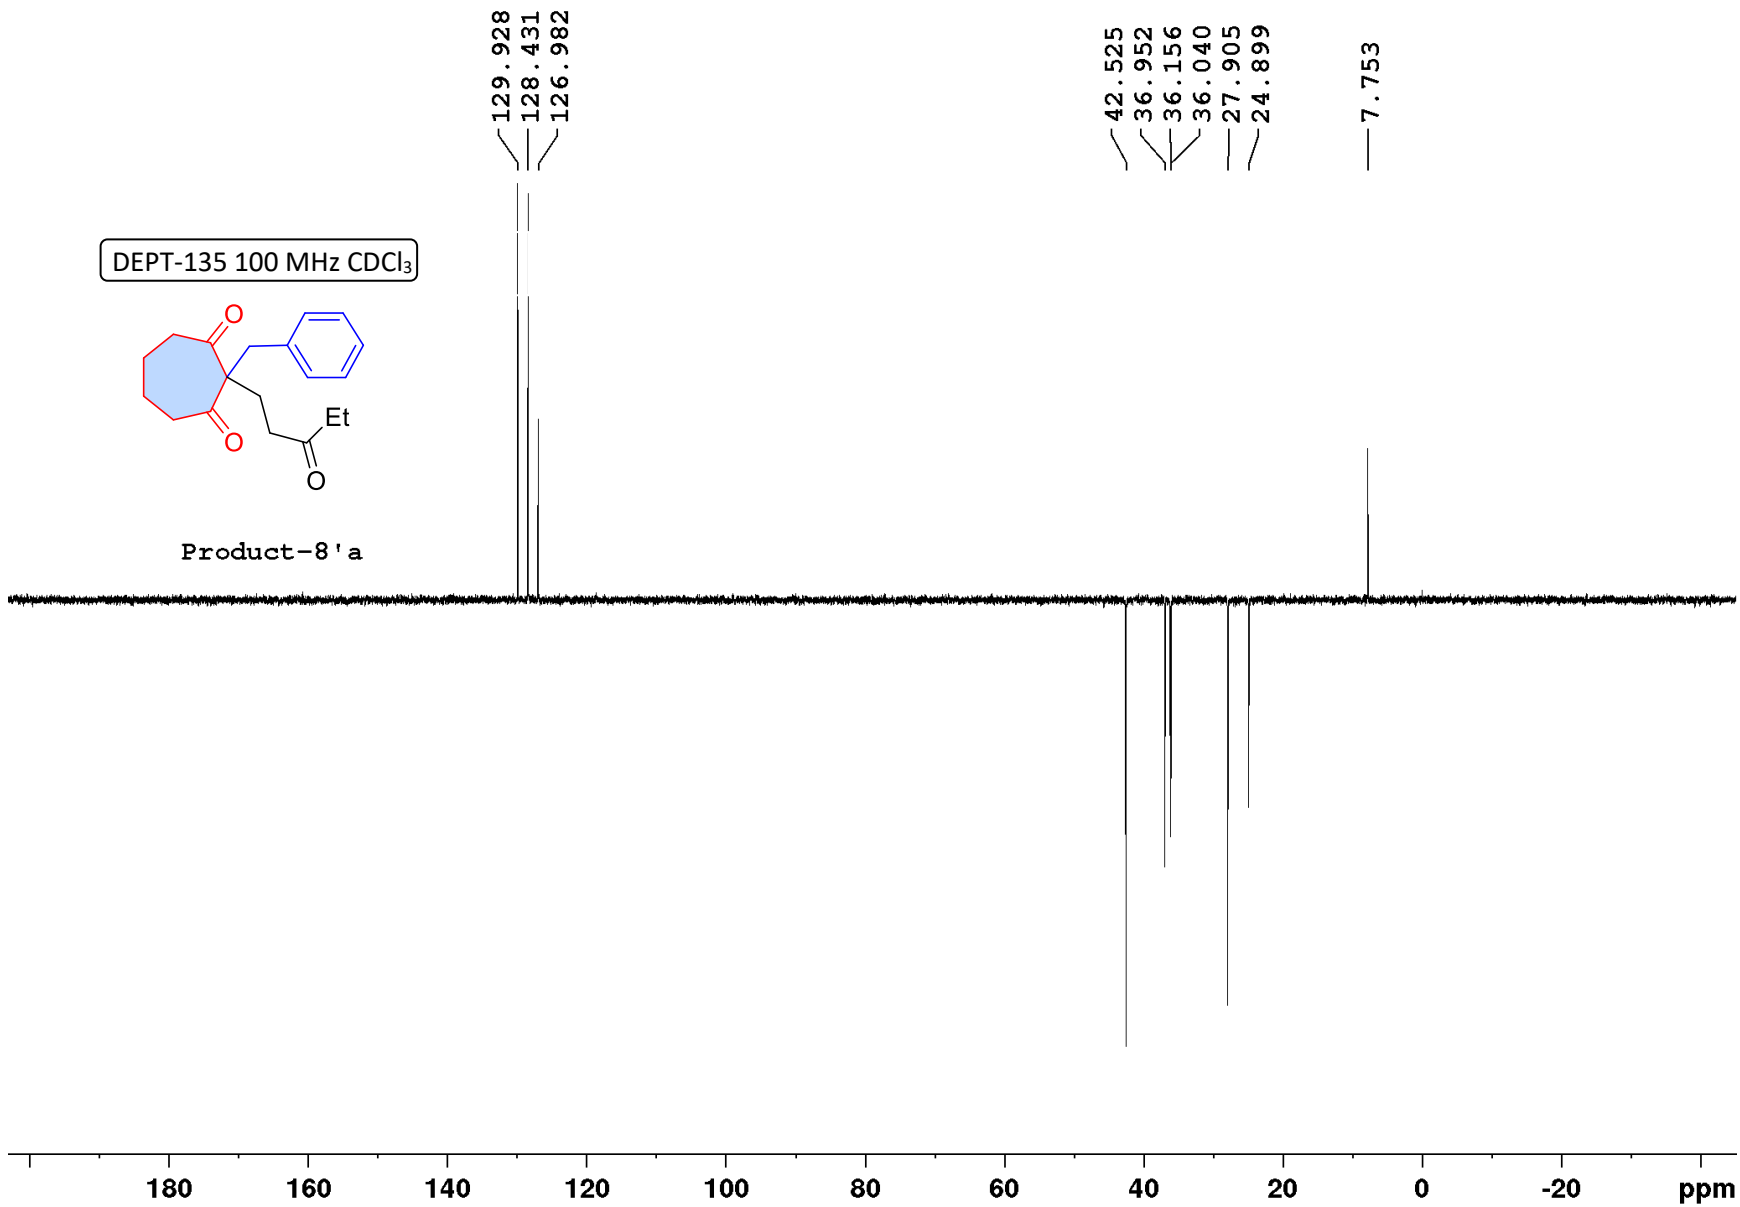

7.260 CDCl<sub>3</sub>

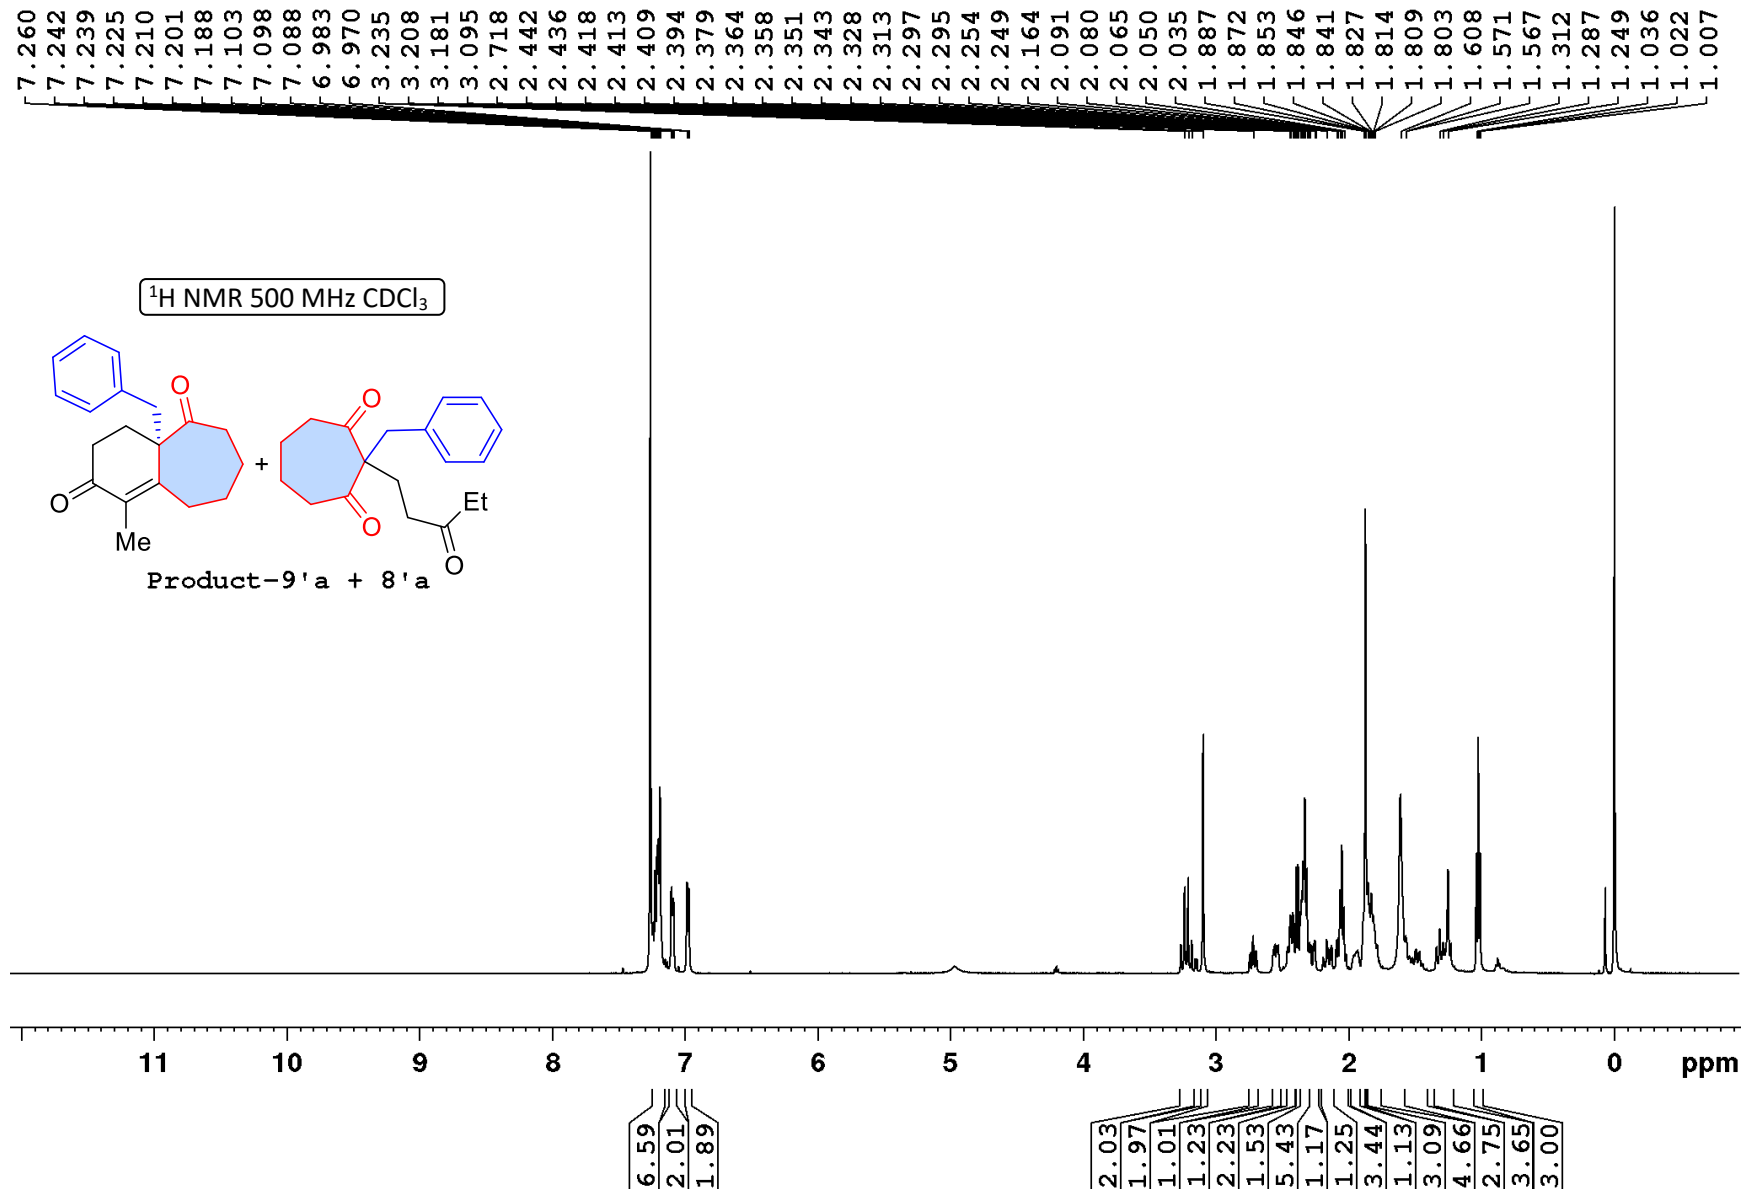



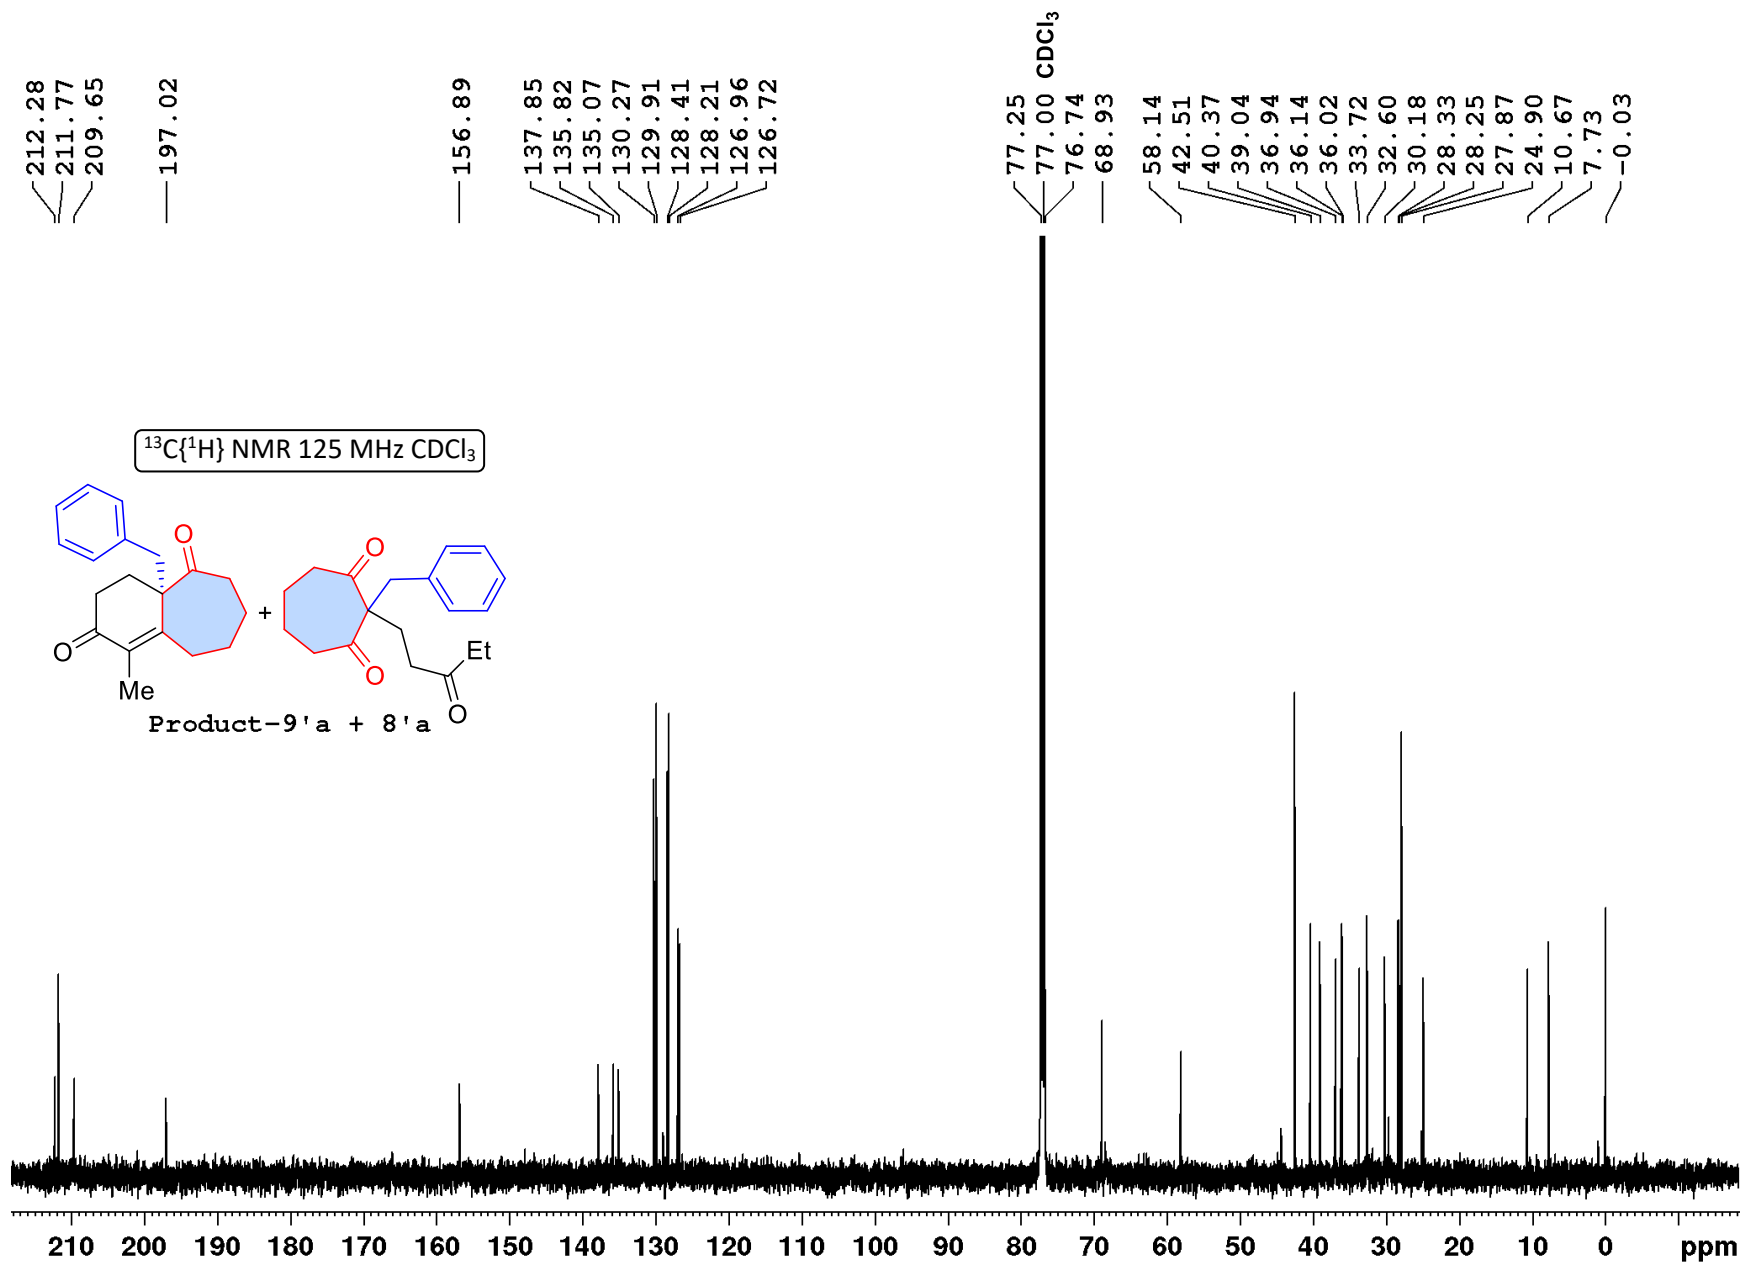

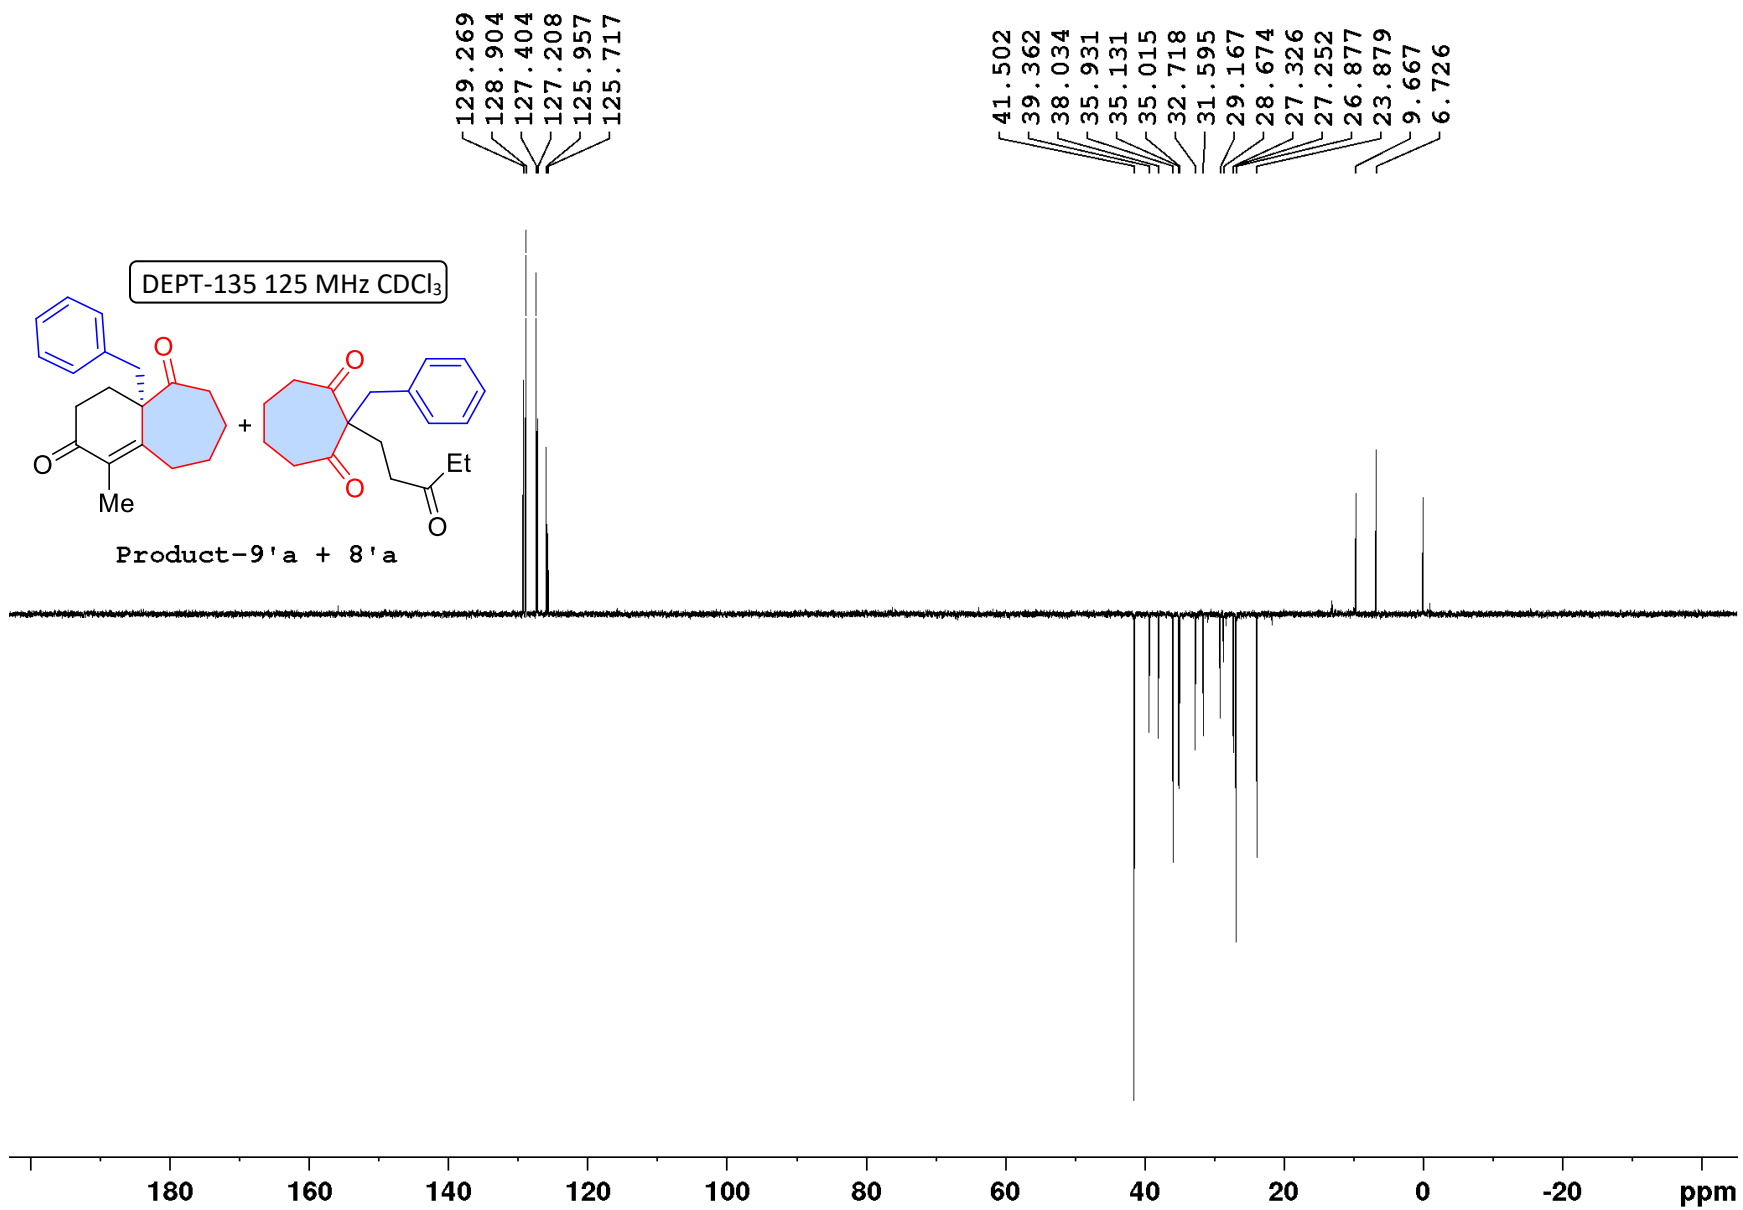

Supplement: d3gc02975a2.pdf [file d3gc02975a2.pdf]
