# Supplementary material for: Conformation-controlled catalytic asymmetric synthesis of Swaminathan ketones
Source: Royal Society of Chemistry journal article supplement (doi:10.1039/d3gc02975a), 2023-09-12
Supplement: d3gc02975a3.pdf [file d3gc02975a3.pdf]

## Supporting Information-III

### Conformation-controlled Catalytic Asymmetric Synthesis of Swaminathan Ketones

*Anugam V. Krishna, Shyam D. Sanwal,<sup>‡</sup> Sibani Rath,<sup>‡</sup> P. R. Lakshmi,  
and Dhevalapally B. Ramachary\**

*Catalysis Laboratory, School of Chemistry, University of Hyderabad, Hyderabad-500 046,  
India; E-mail: [ramsc@uohyd.ac.in](mailto:ramsc@uohyd.ac.in) and [ramchary.db@gmail.com](mailto:ramchary.db@gmail.com)*

<sup>‡</sup>These authors contributed equally.

The enantiomeric excess (*ee*) of the products **9** were determined by chiral stationary phase HPLC using a Daicel Chiralpak IG or Daicel Chiralpak IC-3 or Daicel Chiralpak AD-H column or Daicel Chiralpak ID column and hexane/2-propanol as the eluent. Retention times and solvent ratios are indicated in the respective entries.

Racemic ( $\pm$ )-**9a**:

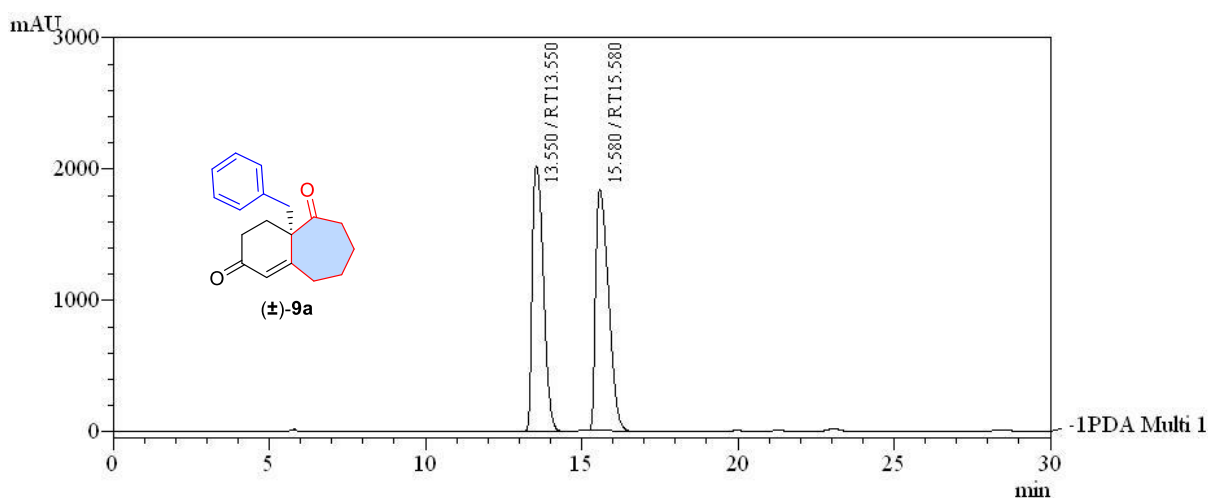

Chiralpak IG, Hexane/*i*-PrOH = 90:10, mL/Min, Flow Rate 1.0 mL/min, 254 nm

| PeakTable         |          |           |           |         |         |          |
|-------------------|----------|-----------|-----------|---------|---------|----------|
| PDA Ch1 254nm 4nm |          |           |           |         |         |          |
| Peak#             | Name     | Ret. Time | Area      | Height  | Area %  | Height % |
| 1                 | RT13.550 | 13.550    | 50568890  | 2022666 | 48.892  | 52.378   |
| 2                 | RT15.580 | 15.580    | 52861884  | 1838985 | 51.108  | 47.622   |
| Total             |          |           | 103430774 | 3861651 | 100.000 | 100.000  |

Chiral (-)-**9a** (88% *ee*)

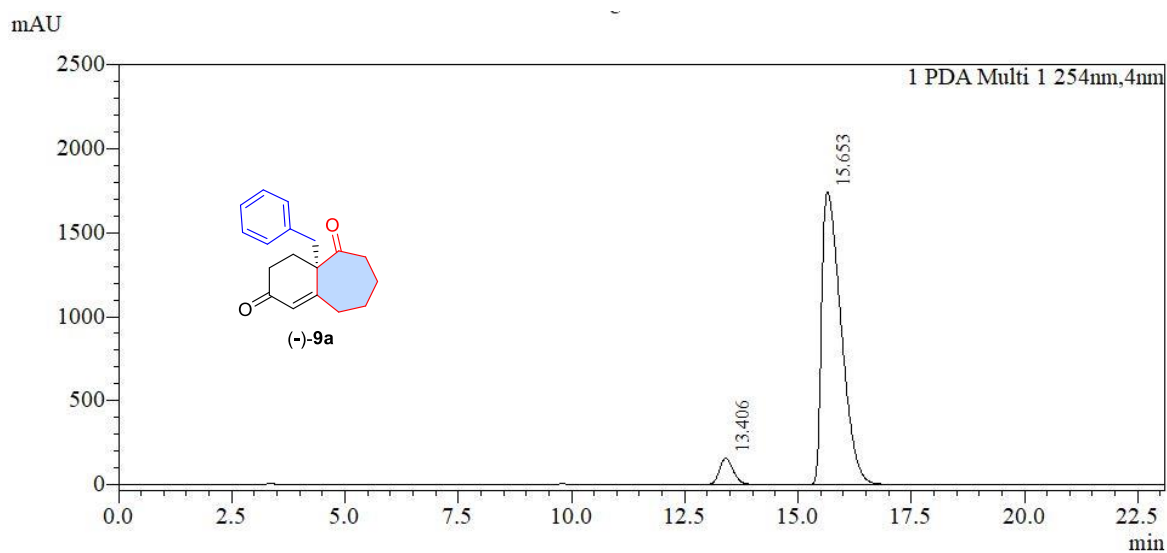

Chiralpak IG, Hexane/*i*-PrOH = 90:10, mL/Min, Flow Rate 1.0 mL/min, 254

| Peak Table    |           |           |          |         |         |         |  |
|---------------|-----------|-----------|----------|---------|---------|---------|--|
| PDA Ch1 254nm |           |           |          |         |         |         |  |
| Peak#         | Name      | Ret. Time | Area     | Height  | Area%   | Height% |  |
| 1             | RT:13.406 | 13.406    | 3322008  | 157074  | 5.952   | 8.255   |  |
| 2             | RT:15.653 | 15.653    | 52488616 | 1745667 | 94.048  | 91.745  |  |
| Total         |           |           | 55810623 | 1902741 | 100.000 | 100.000 |  |

Chiral (-)-**9a** [ $>99\%$  *ee*; Crystals after slow crystallization as mentioned in the manuscript]

mAU

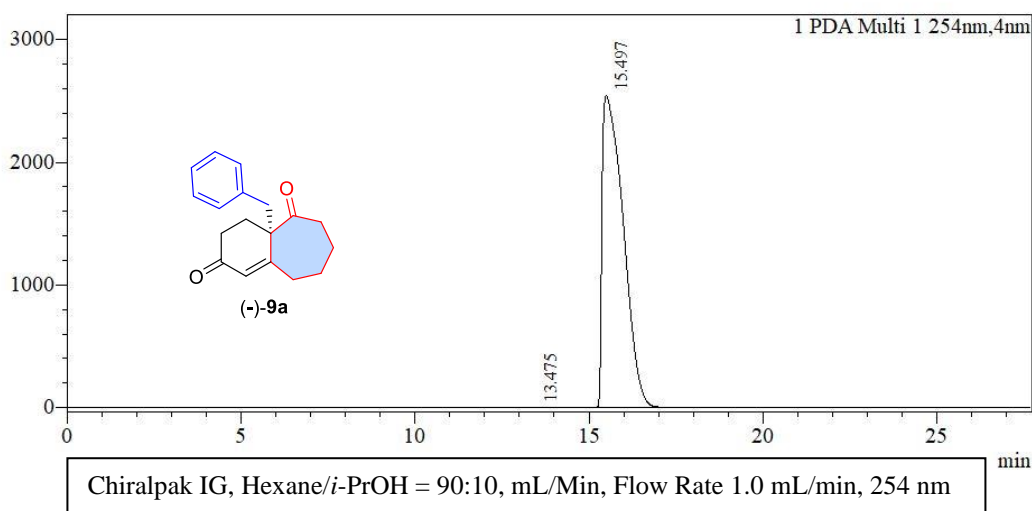

| Peak Table    |           |           |           |         |         |         |
|---------------|-----------|-----------|-----------|---------|---------|---------|
| PDA Ch1 254nm |           |           |           |         |         |         |
| Peak#         | Name      | Ret. Time | Area      | Height  | Area%   | Height% |
| 1             | RT:13.475 | 13.475    | 31967     | 1619    | 0.030   | 0.064   |
| 2             | RT:15.497 | 15.497    | 106550113 | 2547063 | 99.970  | 99.936  |
| Total         |           |           | 106582080 | 2548682 | 100.000 | 100.000 |

Chiral (-)-**9a** [43% *ee*; Filtrate after slow crystallization as mentioned in the manuscript]

mAU

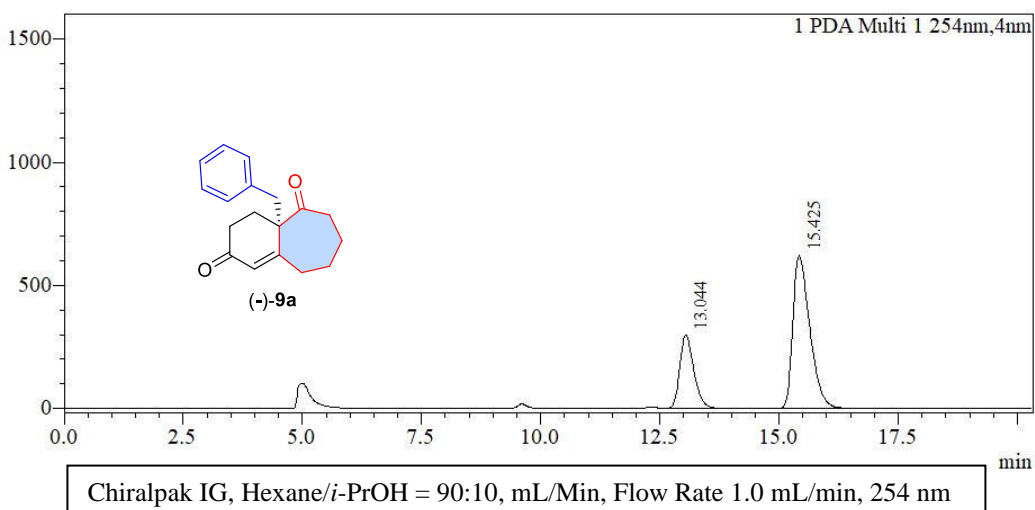

| Peak Table    |           |           |          |        |         |         |
|---------------|-----------|-----------|----------|--------|---------|---------|
| PDA Ch1 254nm |           |           |          |        |         |         |
| Peak#         | Name      | Ret. Time | Area     | Height | Area%   | Height% |
| 1             | RT:13.044 | 13.044    | 6088621  | 296454 | 28.337  | 32.330  |
| 2             | RT:15.425 | 15.425    | 15397729 | 620515 | 71.663  | 67.670  |
| Total         |           |           | 21486351 | 916969 | 100.000 | 100.000 |

Racemic ( $\pm$ )-**9d**:

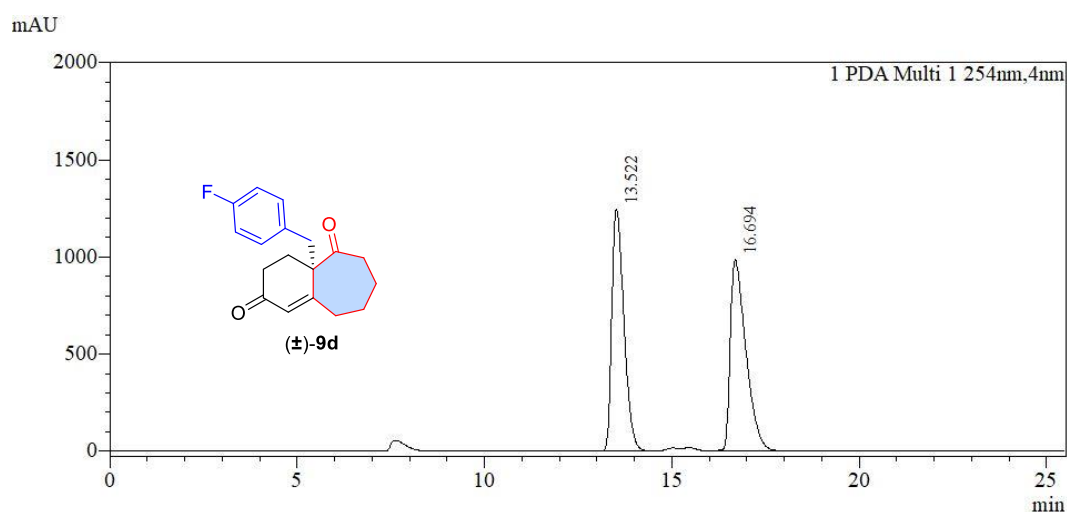

Chiralpak AD-H, Hexane/*i*-PrOH = 90:10, mL/Min, Flow Rate 1.0 mL/min, 254 nm

| Peak Table    |           |           |          |         |         |         |  |
|---------------|-----------|-----------|----------|---------|---------|---------|--|
| PDA Ch1 254nm |           |           |          |         |         |         |  |
| Peak#         | Name      | Ret. Time | Area     | Height  | Area%   | Height% |  |
| 1             | RT:13.522 | 13.522    | 28109069 | 1247011 | 49.480  | 55.853  |  |
| 2             | RT:16.694 | 16.694    | 28700073 | 985660  | 50.520  | 44.147  |  |
| Total         |           |           | 56809142 | 2232671 | 100.000 | 100.000 |  |

Chiral (-)-**9d** (92% *ee*)

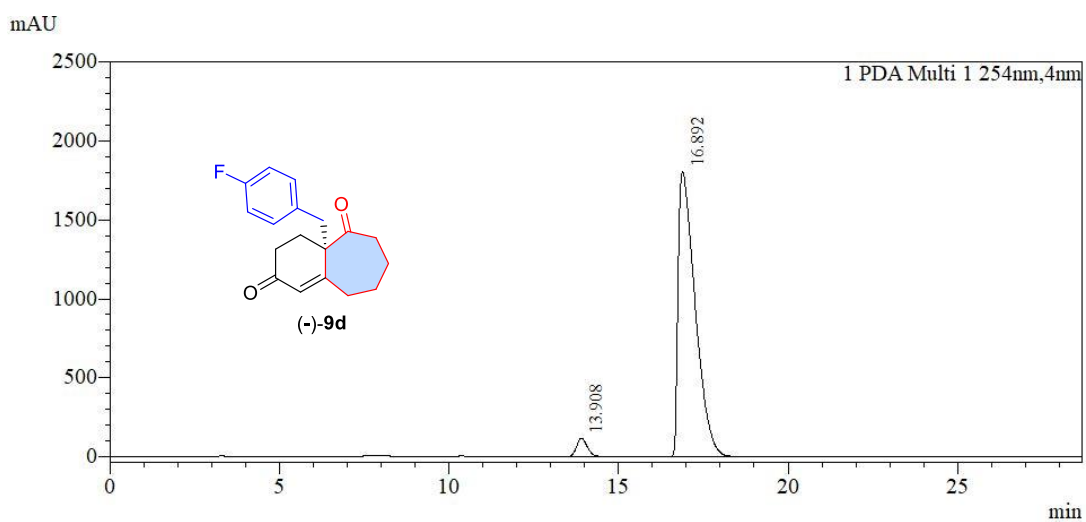

Chiralpak AD-H, Hexane/*i*-PrOH = 90:10, mL/Min, Flow Rate 1.0 mL/min, 254 nm

| Peak Table    |           |           |          |         |         |         |  |
|---------------|-----------|-----------|----------|---------|---------|---------|--|
| PDA Ch1 254nm |           |           |          |         |         |         |  |
| Peak#         | Name      | Ret. Time | Area     | Height  | Area%   | Height% |  |
| 1             | RT:13.908 | 13.908    | 2548123  | 117535  | 3.887   | 6.111   |  |
| 2             | RT:16.892 | 16.892    | 63014469 | 1805875 | 96.113  | 93.889  |  |
| Total         |           |           | 65562593 | 1923410 | 100.000 | 100.000 |  |

### Racemic ( $\pm$ )-**9f**:

mAU

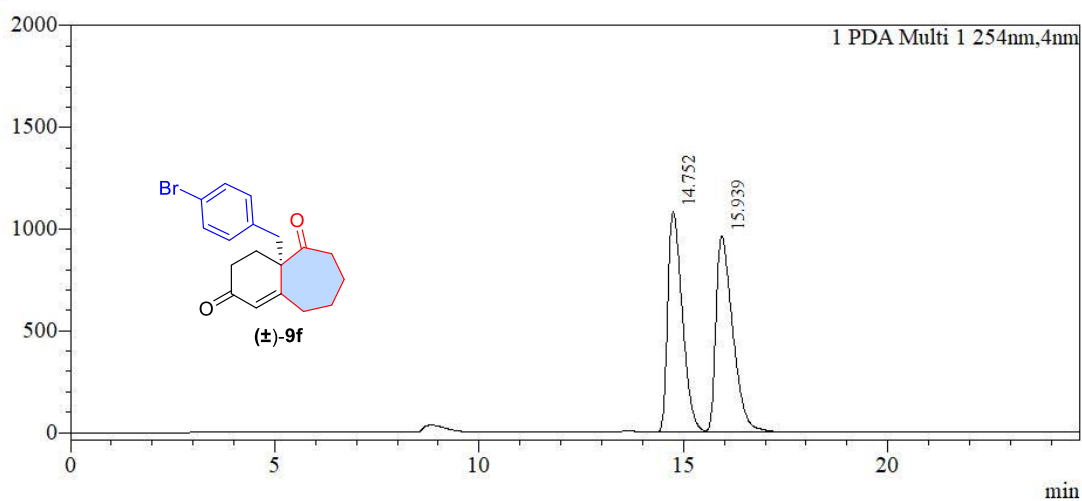

| Peak Table    |           |           |          |         |         |         |  |
|---------------|-----------|-----------|----------|---------|---------|---------|--|
| PDA Ch1 254nm |           |           |          |         |         |         |  |
| Peak#         | Name      | Ret. Time | Area     | Height  | Area%   | Height% |  |
| 1             | RT:14.752 | 14.752    | 26994485 | 1083301 | 49.274  | 52.957  |  |
| 2             | RT:15.939 | 15.939    | 27790219 | 962334  | 50.726  | 47.043  |  |
| Total         |           |           | 54784704 | 2045635 | 100.000 | 100.000 |  |

### Chiral (-)-**9f** (91% *ee*)

mAU

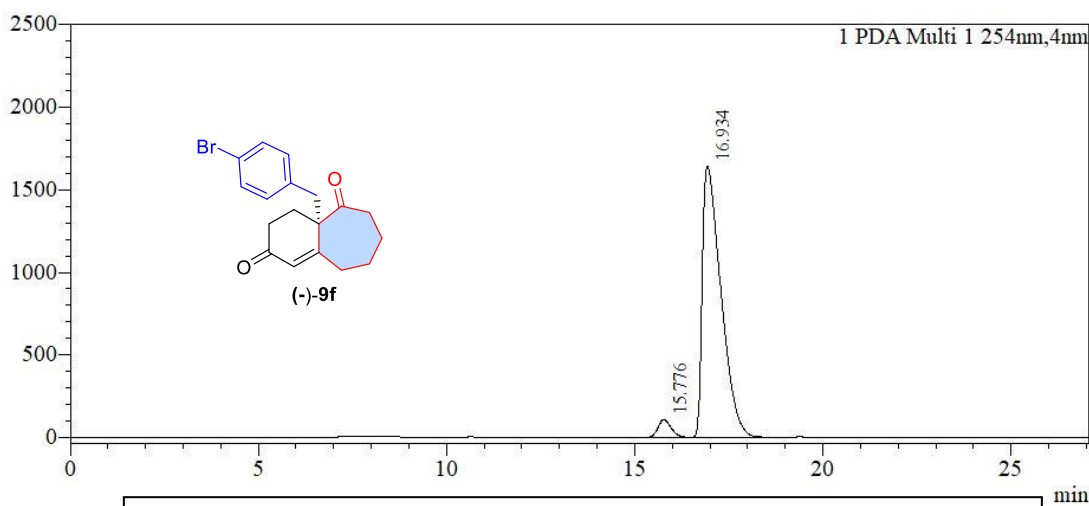

| Peak Table    |           |           |          |         |         |         |  |
|---------------|-----------|-----------|----------|---------|---------|---------|--|
| PDA Ch1 254nm |           |           |          |         |         |         |  |
| Peak#         | Name      | Ret. Time | Area     | Height  | Area%   | Height% |  |
| 1             | RT:15.776 | 15.776    | 2722972  | 108855  | 4.550   | 6.222   |  |
| 2             | RT:16.934 | 16.934    | 57119358 | 1640624 | 95.450  | 93.778  |  |
| Total         |           |           | 59842330 | 1749480 | 100.000 | 100.000 |  |

Racemic ( $\pm$ )-**9k**:

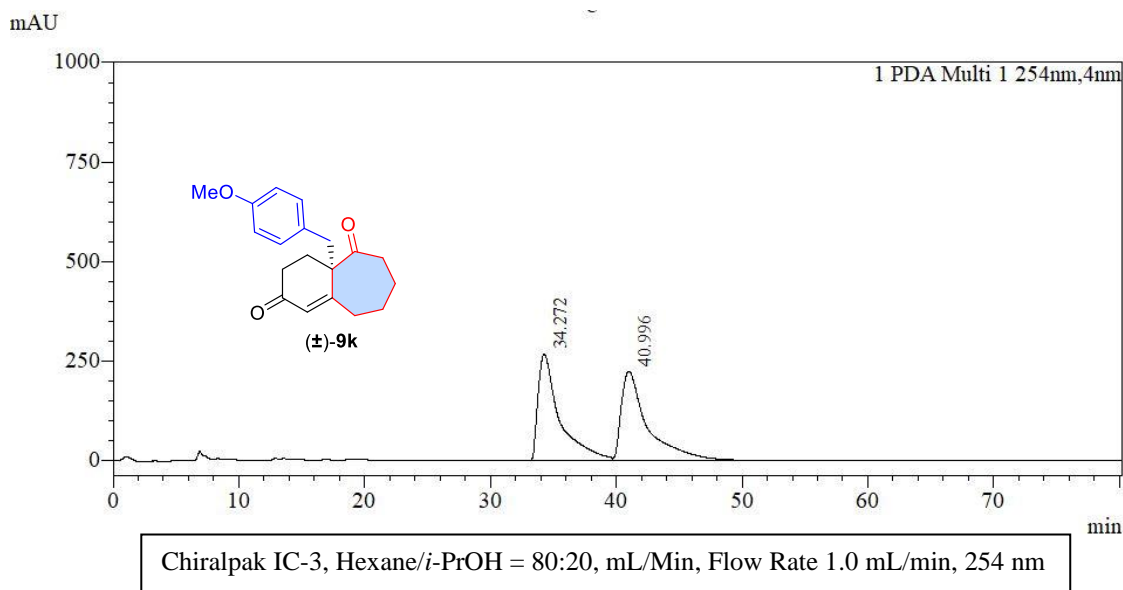

| Peak Table    |           |           |          |        |         |         |
|---------------|-----------|-----------|----------|--------|---------|---------|
| PDA Ch1 254nm |           |           |          |        |         |         |
| Peak#         | Name      | Ret. Time | Area     | Height | Area%   | Height% |
| 1             | RT:34.272 | 34.272    | 31568414 | 267321 | 49.568  | 54.411  |
| 2             | RT:40.996 | 40.996    | 32118257 | 223983 | 50.432  | 45.589  |
| Total         |           |           | 63686671 | 491304 | 100.000 | 100.000 |

Chiral (-)-**9k** (93% *ee*)

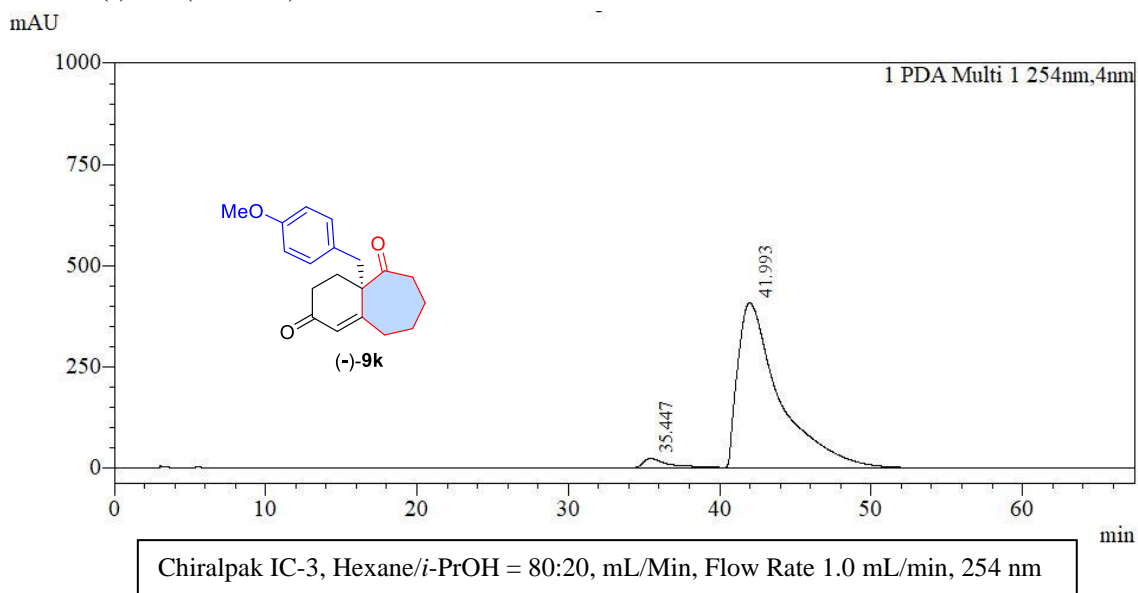

| Peak Table    |           |           |          |        |         |         |
|---------------|-----------|-----------|----------|--------|---------|---------|
| PDA Ch1 254nm |           |           |          |        |         |         |
| Peak#         | Name      | Ret. Time | Area     | Height | Area%   | Height% |
| 1             | RT:35.447 | 35.447    | 2782627  | 23278  | 3.414   | 5.404   |
| 2             | RT:41.993 | 41.993    | 78716444 | 407479 | 96.586  | 94.596  |
| Total         |           |           | 81499070 | 430757 | 100.000 | 100.000 |

### Racemic ( $\pm$ )-**9p**:

mAU

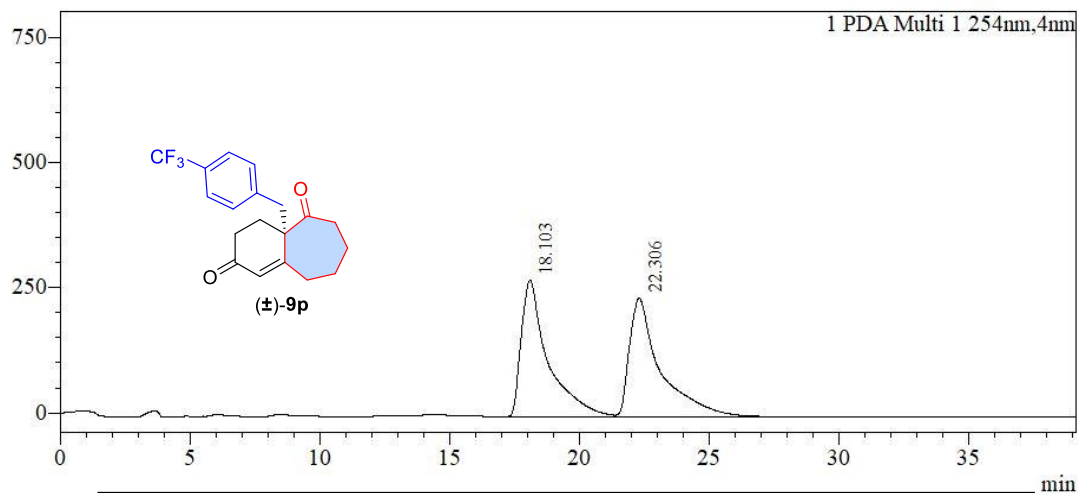

| Peak Table    |           |           |          |        |         |         |
|---------------|-----------|-----------|----------|--------|---------|---------|
| PDA Ch1 254nm |           |           |          |        |         |         |
| Peak#         | Name      | Ret. Time | Area     | Height | Area%   | Height% |
| 1             | RT:18.103 | 18.103    | 19372333 | 272329 | 49.887  | 53.538  |
| 2             | RT:22.306 | 22.306    | 19459930 | 236338 | 50.113  | 46.462  |
| Total         |           |           | 38832263 | 508667 | 100.000 | 100.000 |

### Chiral (-)-**9p** (96% *ee*)

mAU

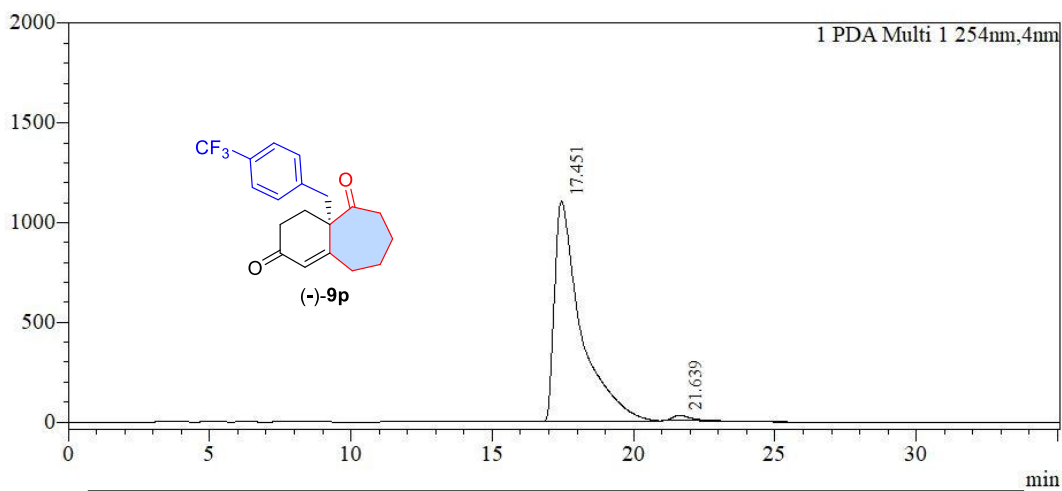

| Peak Table    |           |           |          |         |         |         |
|---------------|-----------|-----------|----------|---------|---------|---------|
| PDA Ch1 254nm |           |           |          |         |         |         |
| Peak#         | Name      | Ret. Time | Area     | Height  | Area%   | Height% |
| 1             | RT:17.451 | 17.451    | 72112855 | 1105872 | 97.845  | 97.515  |
| 2             | RT:21.639 | 21.639    | 1588420  | 28187   | 2.155   | 2.485   |
| Total         |           |           | 73701275 | 1134059 | 100.000 | 100.000 |

### Racemic ( $\pm$ )-**9r**:

mAU

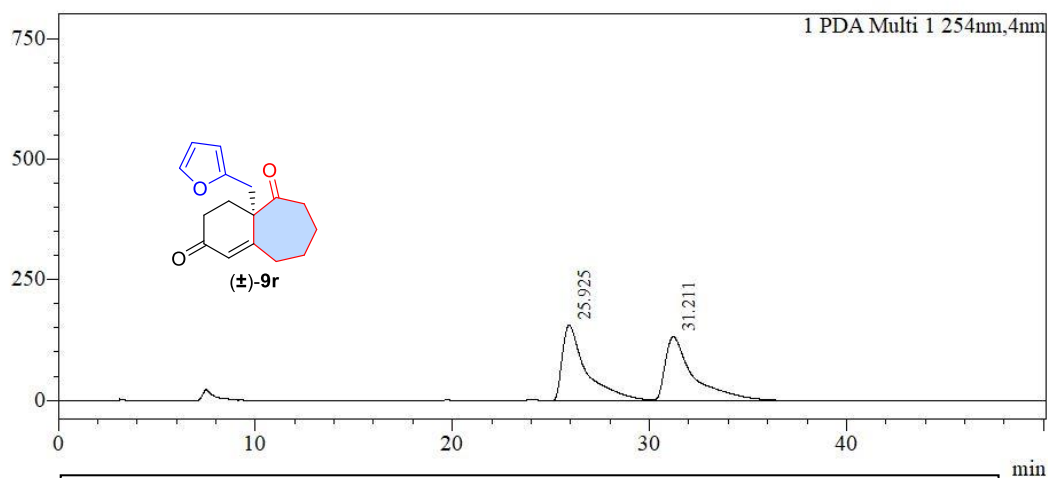

Chiralpak IC-3, Hexane/*i*-PrOH = 90:10, mL/Min, Flow Rate 1.0 mL/min, 254 nm

| Peak Table    |           |           |          |        |         |         |
|---------------|-----------|-----------|----------|--------|---------|---------|
| PDA Ch1 254nm |           |           |          |        |         |         |
| Peak#         | Name      | Ret. Time | Area     | Height | Area%   | Height% |
| 1             | RT:25.925 | 25.925    | 13233611 | 156198 | 50.018  | 54.108  |
| 2             | RT:31.211 | 31.211    | 13224114 | 132481 | 49.982  | 45.892  |
| Total         |           |           | 26457725 | 288679 | 100.000 | 100.000 |

### Chiral (-)-**9r** (95% *ee*)

mAU

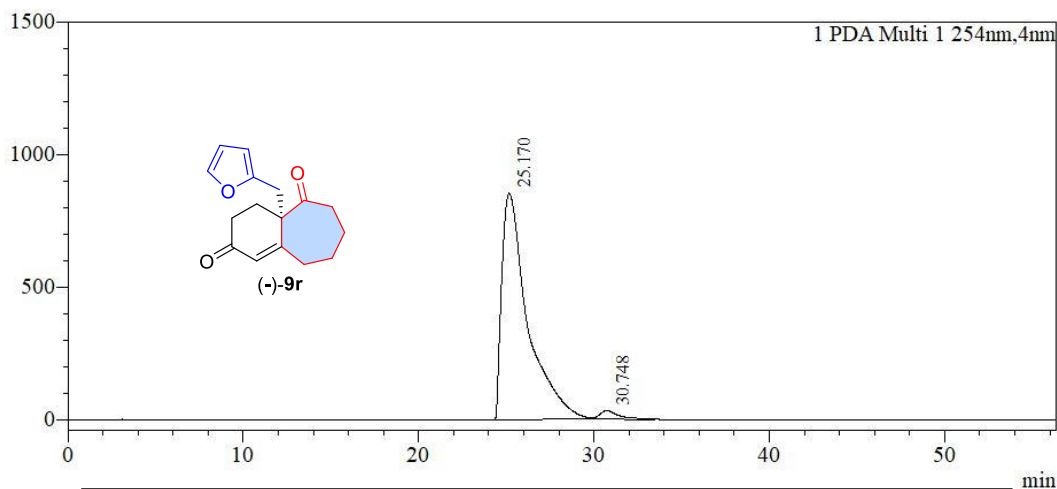

Chiralpak IC-3, Hexane/*i*-PrOH = 90:10, mL/Min, Flow Rate 1.0 mL/min, 254 nm

| Peak Table    |           |           |          |        |         |         |
|---------------|-----------|-----------|----------|--------|---------|---------|
| PDA Ch1 254nm |           |           |          |        |         |         |
| Peak#         | Name      | Ret. Time | Area     | Height | Area%   | Height% |
| 1             | RT:25.170 | 25.170    | 87273352 | 854342 | 97.325  | 96.471  |
| 2             | RT:30.748 | 30.748    | 2398404  | 31255  | 2.675   | 3.529   |
| Total         |           |           | 89671756 | 885597 | 100.000 | 100.000 |



Chiral (-)-**9r** (>99% *ee*, single crystal used for X-ray structure analysis)

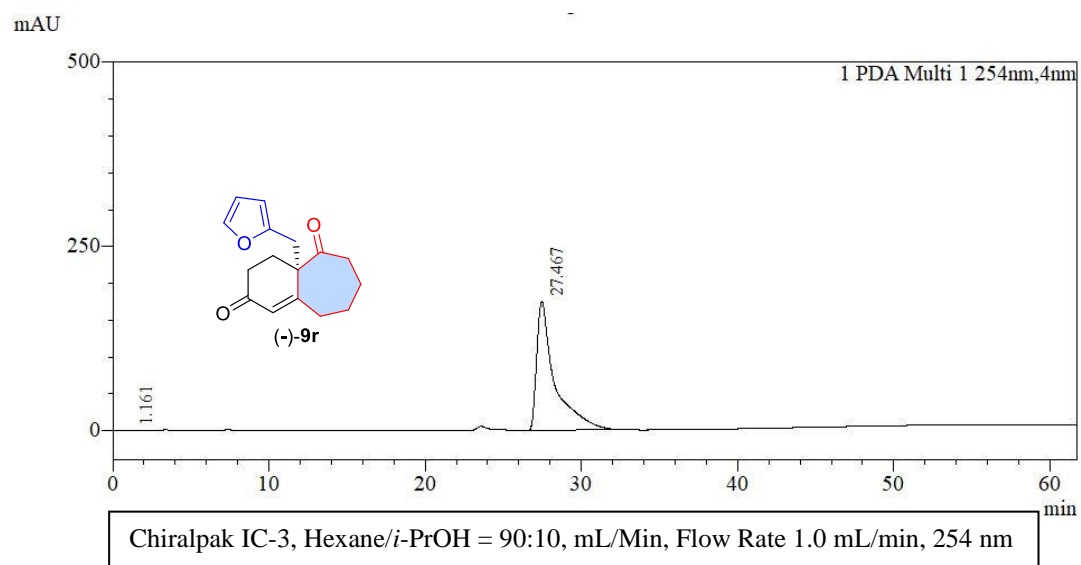

| Peak Table |           |           |          |        |         |         |
|------------|-----------|-----------|----------|--------|---------|---------|
| Peak#      | Name      | Ret. Time | Area     | Height | Area%   | Height% |
| 1          |           | 1.161     | -37      | 4      | -0.000  | 0.003   |
| 2          | RT:27.467 | 27.467    | 14073218 | 174961 | 100.000 | 99.997  |
| Total      |           |           | 14073181 | 174966 | 100.000 | 100.000 |

Racemic ( $\pm$ )-**9s**:

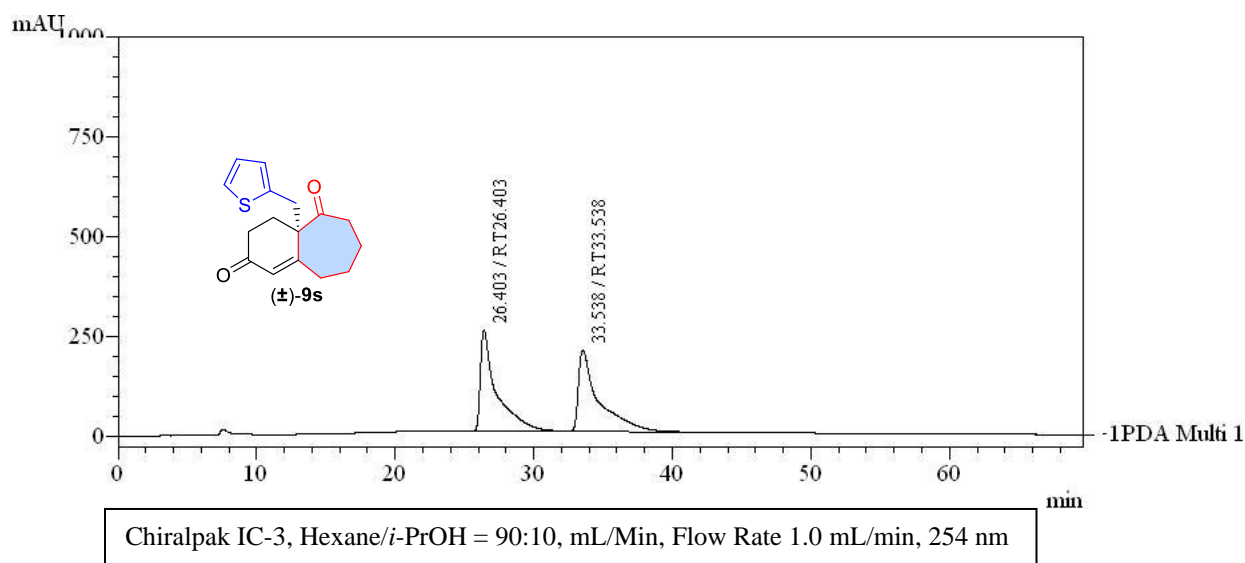

| PeakTable |          |           |          |        |         |          |
|-----------|----------|-----------|----------|--------|---------|----------|
| Peak#     | Name     | Ret. Time | Area     | Height | Area %  | Height % |
| 1         | RT26.403 | 26.403    | 20403064 | 252935 | 49.927  | 55.474   |
| 2         | RT33.538 | 33.538    | 20462787 | 203014 | 50.073  | 44.526   |
| Total     |          |           | 40865850 | 455949 | 100.000 | 100.000  |

Chiral (-)-**9s** (92% *ee*)

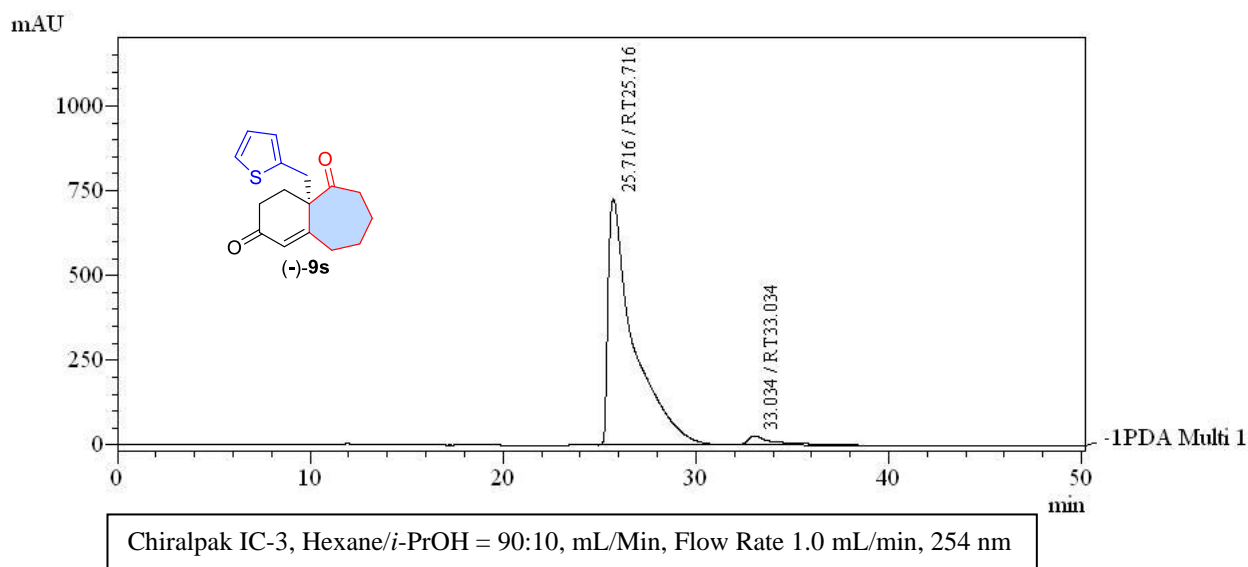

| PeakTable |          |           |          |        |         |          |
|-----------|----------|-----------|----------|--------|---------|----------|
| Peak#     | Name     | Ret. Time | Area     | Height | Area %  | Height % |
| 1         | RT25.716 | 25.716    | 66462936 | 724879 | 96.138  | 96.404   |
| 2         | RT33.034 | 33.034    | 2669579  | 27039  | 3.862   | 3.596    |
| Total     |          |           | 69132515 | 751919 | 100.000 | 100.000  |

Racemic ( $\pm$ )-**9u**:

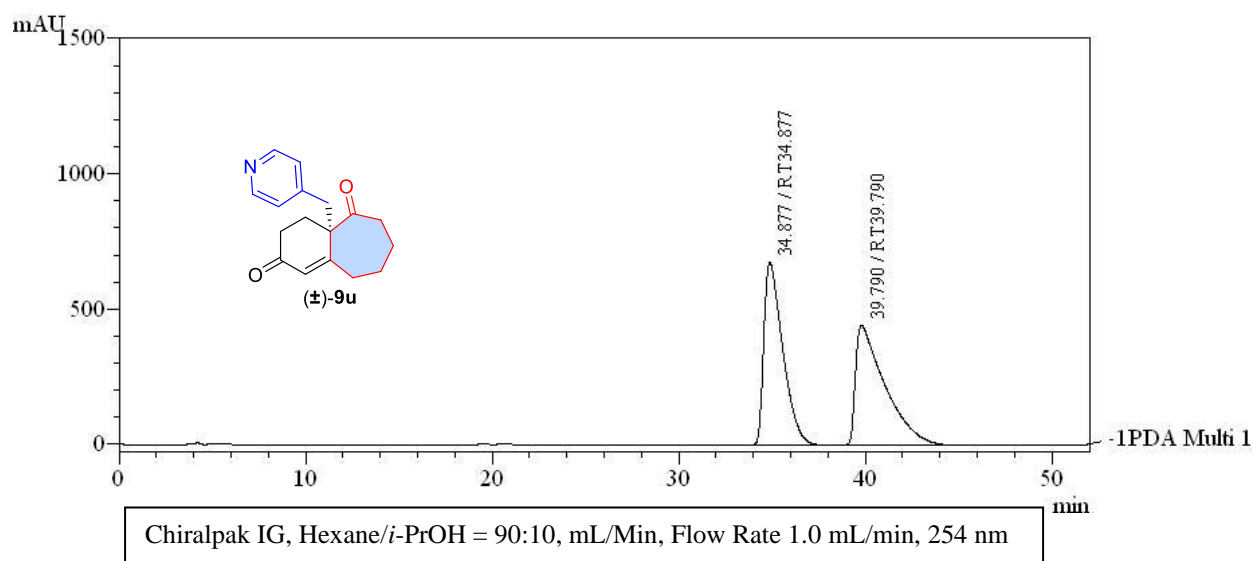

| PeakTable         |          |           |          |         |         |          |
|-------------------|----------|-----------|----------|---------|---------|----------|
| PDA Ch1 254nm 4nm |          |           |          |         |         |          |
| Peak#             | Name     | Ret. Time | Area     | Height  | Area %  | Height % |
| 1                 | RT34.877 | 34.877    | 47678484 | 675287  | 49.692  | 60.430   |
| 2                 | RT39.790 | 39.790    | 48269863 | 442181  | 50.308  | 39.570   |
| Total             |          |           | 95948346 | 1117467 | 100.000 | 100.000  |

Chiral (-)-**9u** (93% *ee*)

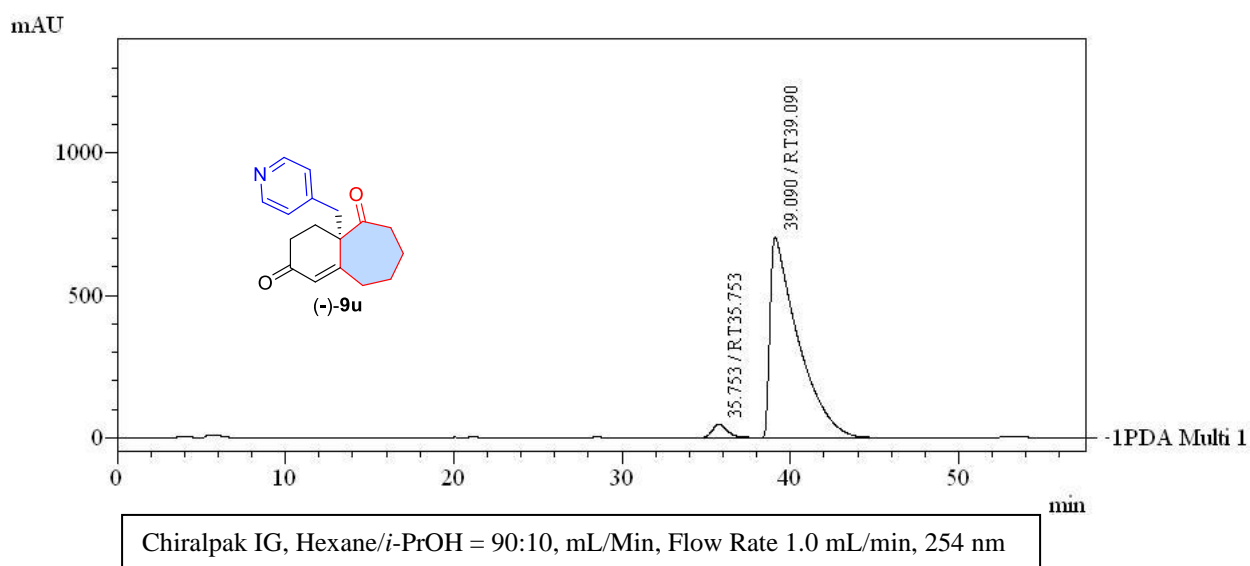

| PeakTable         |          |           |          |        |         |          |
|-------------------|----------|-----------|----------|--------|---------|----------|
| PDA Ch1 254nm 4nm |          |           |          |        |         |          |
| Peak#             | Name     | Ret. Time | Area     | Height | Area %  | Height % |
| 1                 | RT35.753 | 35.753    | 2976790  | 47076  | 3.532   | 6.269    |
| 2                 | RT39.090 | 39.090    | 81293073 | 703832 | 96.468  | 93.731   |
| Total             |          |           | 84269863 | 750909 | 100.000 | 100.000  |

### Racemic ( $\pm$ )-**9x**:

mAU

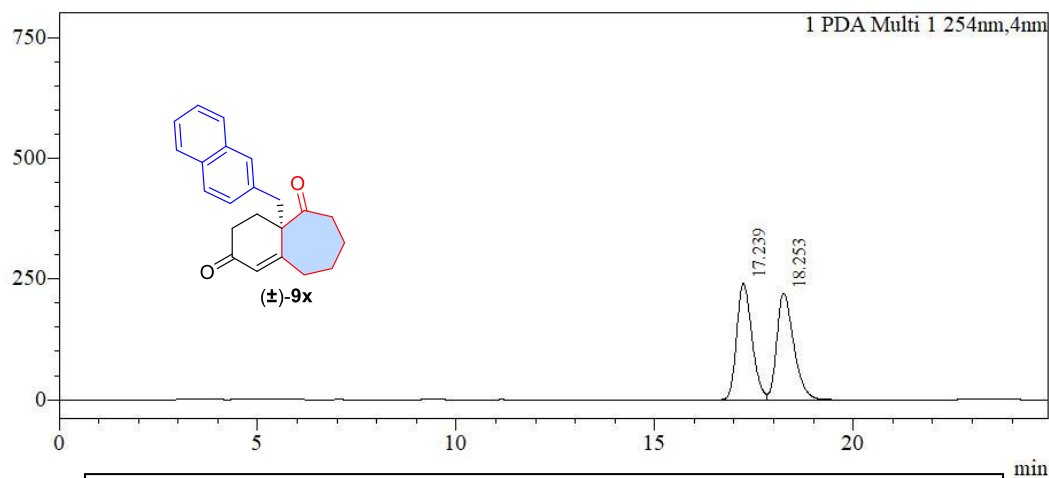

| Peak Table    |           |           |          |        |         |         |
|---------------|-----------|-----------|----------|--------|---------|---------|
| PDA Ch1 254nm |           |           |          |        |         |         |
| Peak#         | Name      | Ret. Time | Area     | Height | Area%   | Height% |
| 1             | RT:17.239 | 17.239    | 6457933  | 240880 | 49.639  | 52.218  |
| 2             | RT:18.253 | 18.253    | 6551766  | 220415 | 50.361  | 47.782  |
| Total         |           |           | 13009699 | 461295 | 100.000 | 100.000 |

### Chiral (-)-**9x** (91% *ee*)

mAU

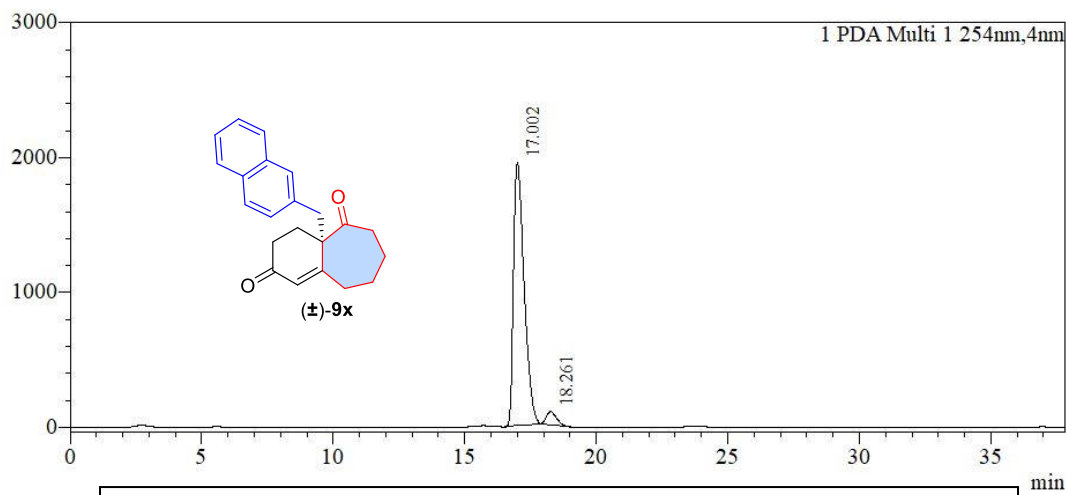

| Peak Table    |           |           |          |         |         |         |
|---------------|-----------|-----------|----------|---------|---------|---------|
| PDA Ch1 254nm |           |           |          |         |         |         |
| Peak#         | Name      | Ret. Time | Area     | Height  | Area%   | Height% |
| 1             | RT:17.002 | 17.002    | 54684325 | 1950804 | 95.542  | 95.218  |
| 2             | RT:18.261 | 18.261    | 2551521  | 97967   | 4.458   | 4.782   |
| Total         |           |           | 57235847 | 2048771 | 100.000 | 100.000 |

### Racemic ( $\pm$ )-**9oo**:

mAU

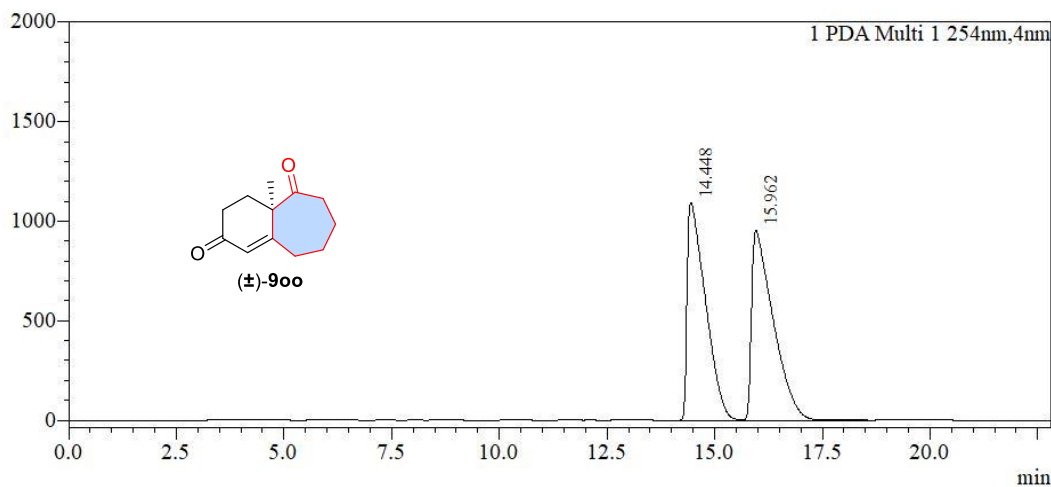

PDA Ch1 254nm

Peak Table

| Peak# | Name      | Ret. Time | Area     | Height  | Area%   | Height% |
|-------|-----------|-----------|----------|---------|---------|---------|
| 1     | RT:14.448 | 14.448    | 32431820 | 1094791 | 49.304  | 53.502  |
| 2     | RT:15.962 | 15.962    | 33347605 | 951467  | 50.696  | 46.498  |
| Total |           |           | 65779425 | 2046258 | 100.000 | 100.000 |

### Chiral (-)-**9oo** (59% *ee*)

mAU

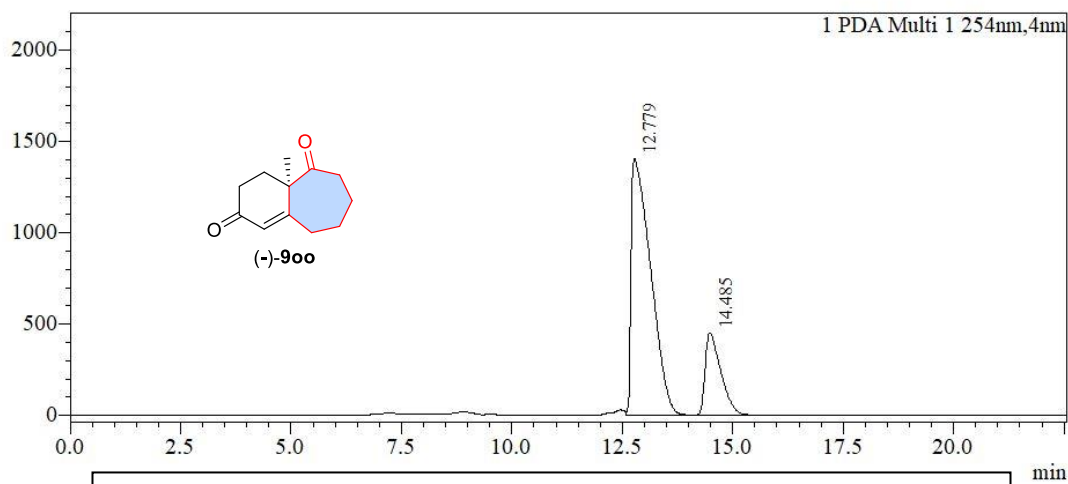

PDA Ch1 254nm

Peak Table

| Peak# | Name      | Ret. Time | Area     | Height  | Area%   | Height% |
|-------|-----------|-----------|----------|---------|---------|---------|
| 1     | RT:12.779 | 12.779    | 43585722 | 1406369 | 79.434  | 75.679  |
| 2     | RT:14.485 | 14.485    | 11284423 | 451975  | 20.566  | 24.321  |
| Total |           |           | 54870145 | 1858344 | 100.000 | 100.000 |

Racemic ( $\pm$ )-**9y**:

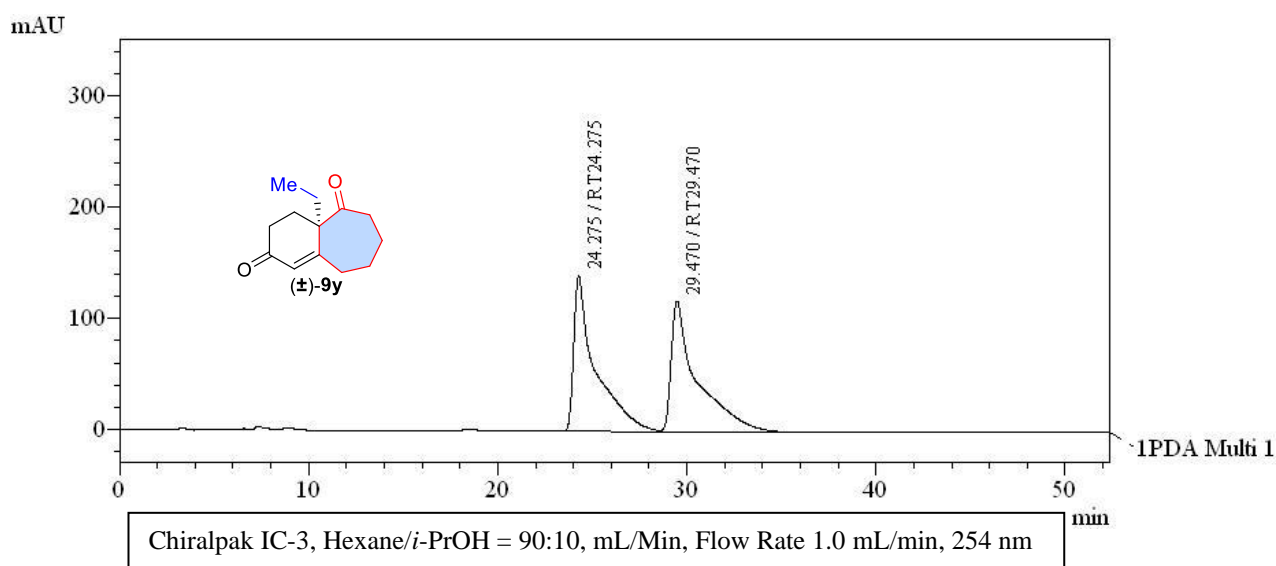

| PeakTable         |          |           |          |        |         |          |
|-------------------|----------|-----------|----------|--------|---------|----------|
| PDA Ch1 254nm 4nm |          |           |          |        |         |          |
| Peak#             | Name     | Ret. Time | Area     | Height | Area %  | Height % |
| 1                 | RT24.275 | 24.275    | 11131445 | 139400 | 50.023  | 54.299   |
| 2                 | RT29.470 | 29.470    | 11121054 | 117327 | 49.977  | 45.701   |
| Total             |          |           | 22252499 | 256728 | 100.000 | 100.000  |

Chiral (-)-**9y** (88% *ee*)

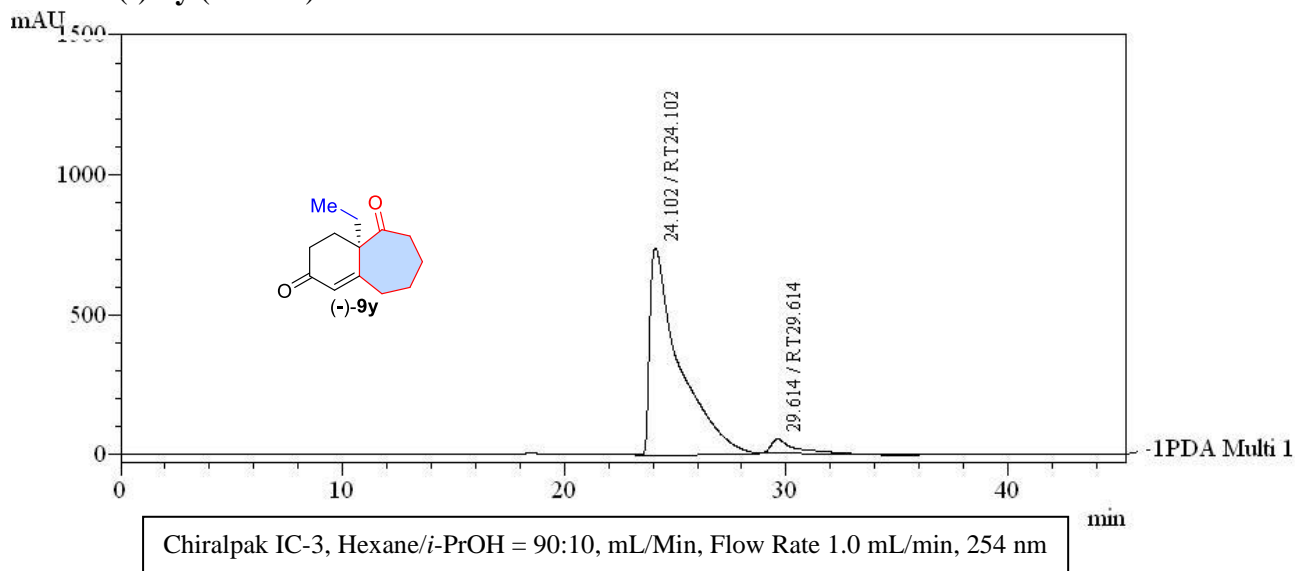

| PeakTable         |          |           |          |        |         |          |
|-------------------|----------|-----------|----------|--------|---------|----------|
| PDA Ch1 254nm 4nm |          |           |          |        |         |          |
| Peak#             | Name     | Ret. Time | Area     | Height | Area %  | Height % |
| 1                 | RT24.102 | 24.102    | 68812069 | 737997 | 94.186  | 93.498   |
| 2                 | RT29.614 | 29.614    | 4247577  | 51322  | 5.814   | 6.502    |
| Total             |          |           | 73059646 | 789319 | 100.000 | 100.000  |

Racemic ( $\pm$ )-**9aa**:

mAU

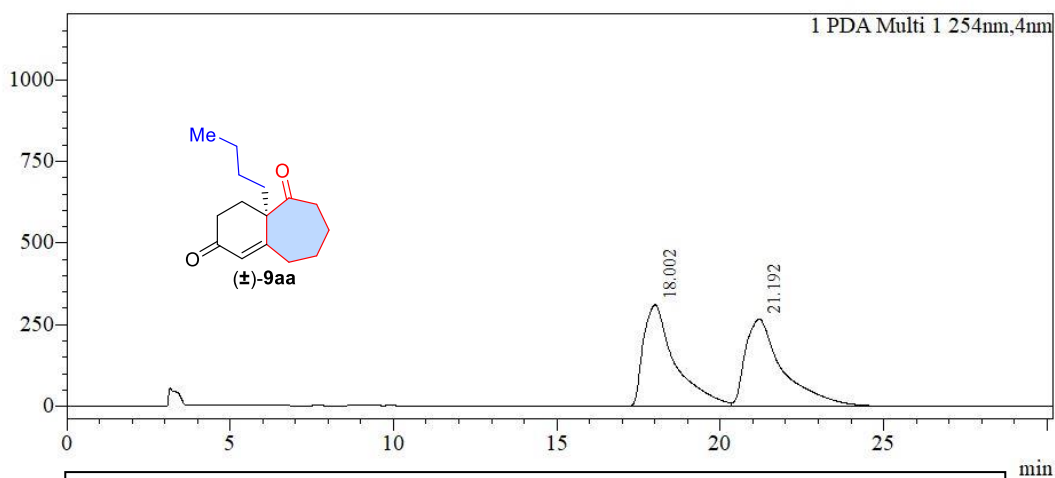

Chiralpak IC-3, Hexane/*i*-PrOH = 90:10, mL/Min, Flow Rate 1.0 mL/min, 254 nm

| Peak Table |           |           |          |        |         |         |
|------------|-----------|-----------|----------|--------|---------|---------|
| Peak#      | Name      | Ret. Time | Area     | Height | Area%   | Height% |
| 1          | RT:18.002 | 18.002    | 20921320 | 310113 | 49.473  | 53.767  |
| 2          | RT:21.192 | 21.192    | 21367423 | 266663 | 50.527  | 46.233  |
| Total      |           |           | 42288744 | 576776 | 100.000 | 100.000 |

Chiral (-)-**9aa** (86% *ee*)

mAU

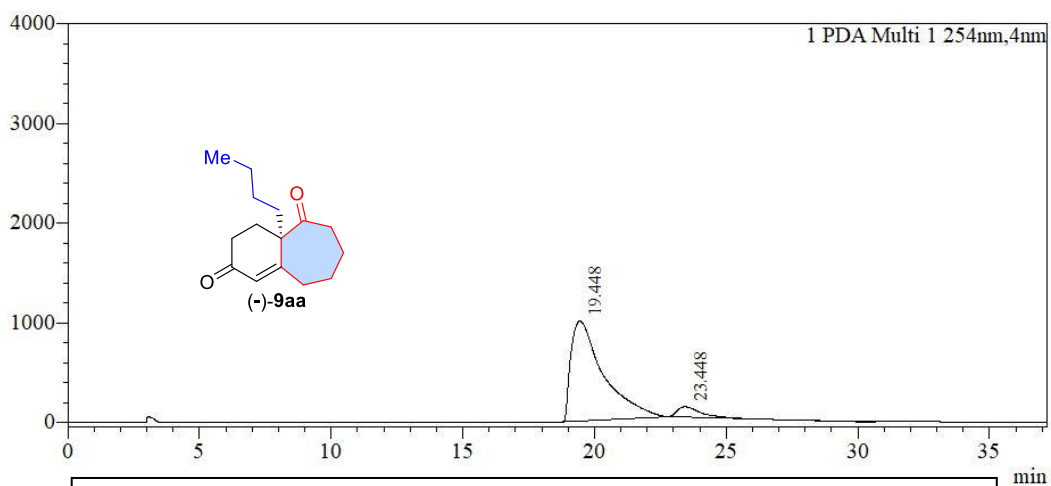

Chiralpak IC-3, Hexane/*i*-PrOH = 90:10, mL/Min, Flow Rate 1.0 mL/min, 254 nm

| Peak Table |           |           |          |         |         |         |
|------------|-----------|-----------|----------|---------|---------|---------|
| Peak#      | Name      | Ret. Time | Area     | Height  | Area%   | Height% |
| 1          | RT:19.448 | 19.448    | 85862984 | 1002047 | 92.972  | 90.702  |
| 2          | RT:23.448 | 23.448    | 6490944  | 102727  | 7.028   | 9.298   |
| Total      |           |           | 92353927 | 1104775 | 100.000 | 100.000 |

### Racemic ( $\pm$ )-9dd:

mAU

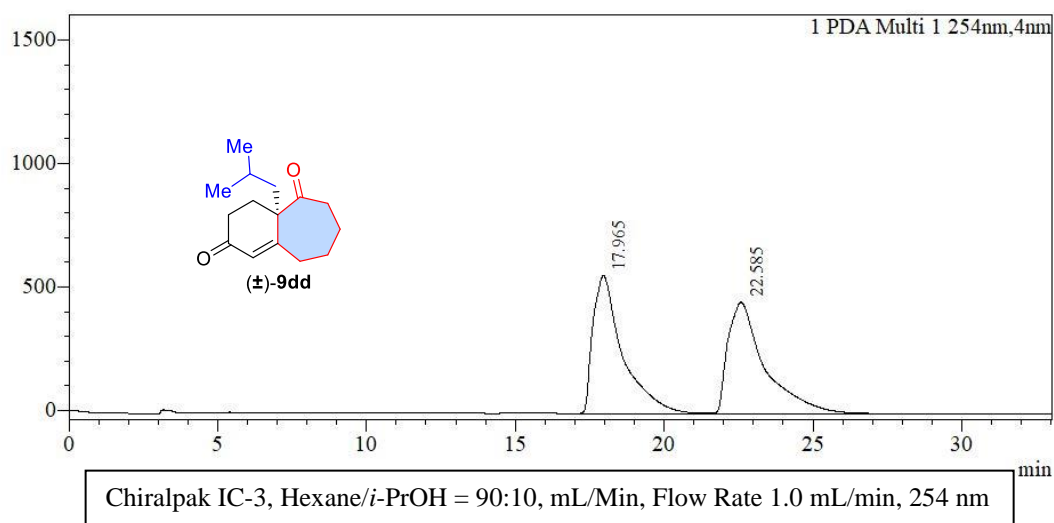

| Peak Table    |           |           |          |         |         |         |
|---------------|-----------|-----------|----------|---------|---------|---------|
| PDA Ch1 254nm |           |           |          |         |         |         |
| Peak#         | Name      | Ret. Time | Area     | Height  | Area%   | Height% |
| 1             | RT:17.965 | 17.965    | 38627409 | 558297  | 49.945  | 55.364  |
| 2             | RT:22.585 | 22.585    | 38712861 | 450108  | 50.055  | 44.636  |
| Total         |           |           | 77340269 | 1008404 | 100.000 | 100.000 |

### Chiral (-)-9dd (71% ee)

mAU

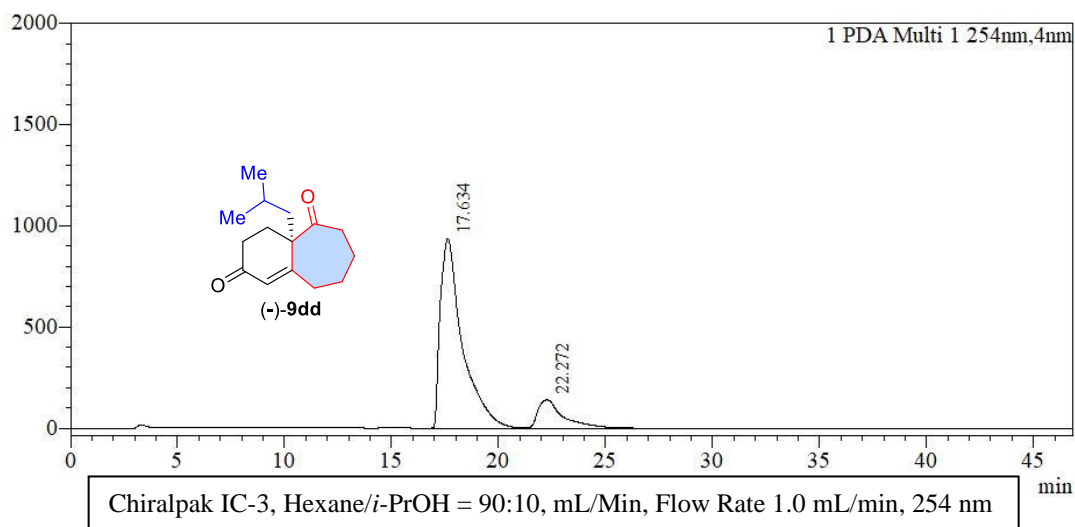

| Peak Table    |           |           |          |         |         |         |
|---------------|-----------|-----------|----------|---------|---------|---------|
| PDA Ch1 254nm |           |           |          |         |         |         |
| Peak#         | Name      | Ret. Time | Area     | Height  | Area%   | Height% |
| 1             | RT:17.634 | 17.634    | 67256576 | 938511  | 85.464  | 87.053  |
| 2             | RT:22.272 | 22.272    | 11438822 | 139584  | 14.536  | 12.947  |
| Total         |           |           | 78695398 | 1078095 | 100.000 | 100.000 |



Racemic ( $\pm$ )-**9gg**:

mAU

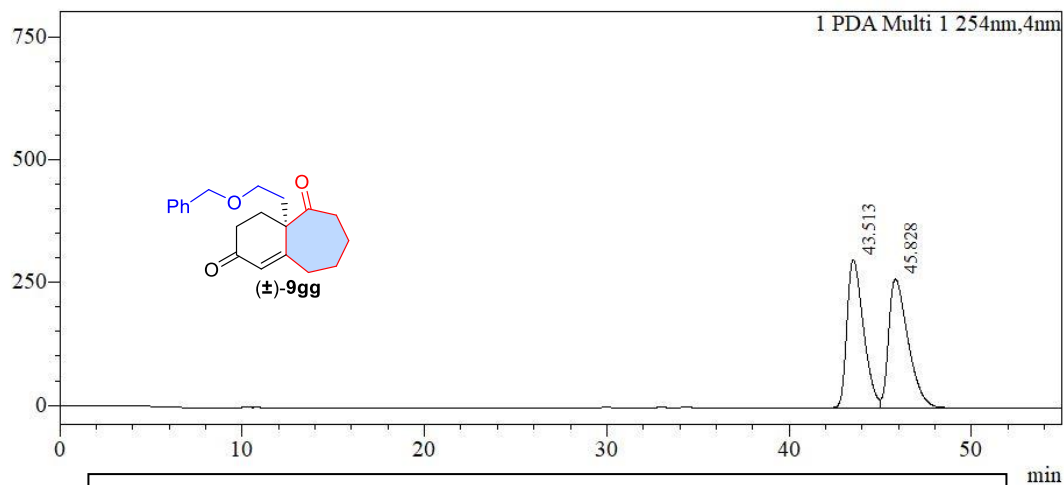

| Peak Table    |           |           |          |        |         |         |
|---------------|-----------|-----------|----------|--------|---------|---------|
| PDA Ch1 254nm |           |           |          |        |         |         |
| Peak#         | Name      | Ret. Time | Area     | Height | Area%   | Height% |
| 1             | RT:43.513 | 43.513    | 19009236 | 301361 | 49.689  | 53.512  |
| 2             | RT:45.828 | 45.828    | 19246972 | 261805 | 50.311  | 46.488  |
| Total         |           |           | 38256208 | 563166 | 100.000 | 100.000 |

Chiral (-)-**9gg** (87% *ee*)

mAU

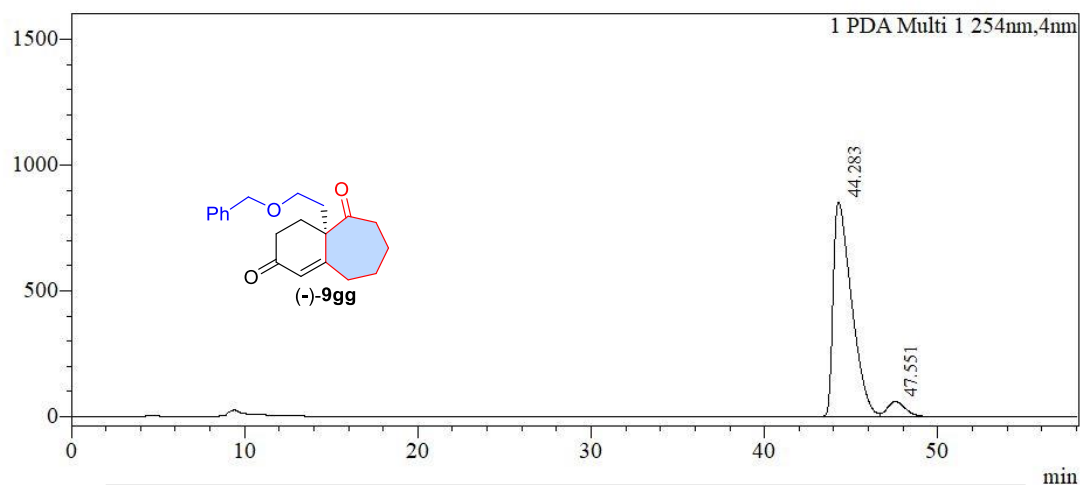

| Peak Table    |           |           |          |        |         |         |
|---------------|-----------|-----------|----------|--------|---------|---------|
| PDA Ch1 254nm |           |           |          |        |         |         |
| Peak#         | Name      | Ret. Time | Area     | Height | Area%   | Height% |
| 1             | RT:44.283 | 44.283    | 63190445 | 853864 | 93.557  | 93.417  |
| 2             | RT:47.551 | 47.551    | 4351469  | 60170  | 6.443   | 6.583   |
| Total         |           |           | 67541913 | 914034 | 100.000 | 100.000 |

### Racemic ( $\pm$ )-9hh:

mAU

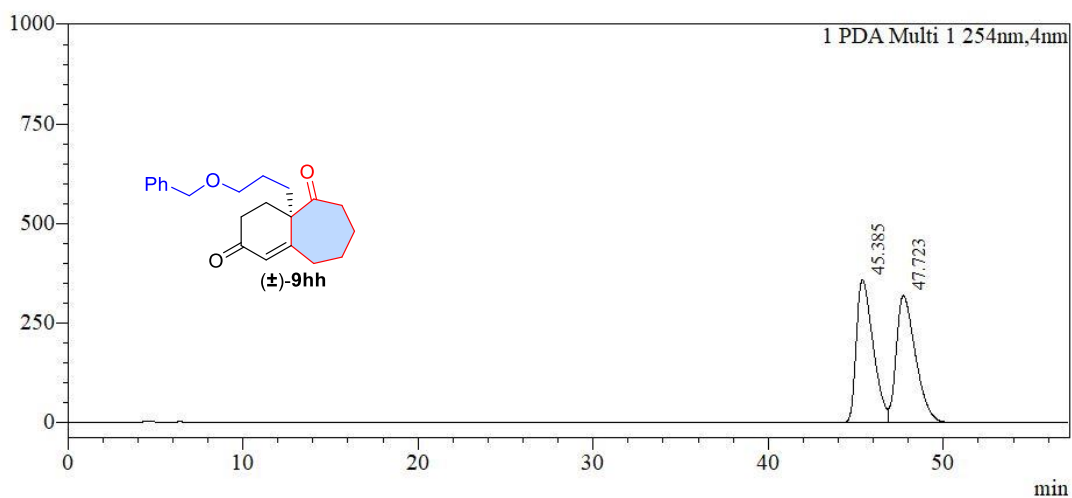

| Peak Table    |           |           |          |        |         |         |
|---------------|-----------|-----------|----------|--------|---------|---------|
| PDA Ch1 254nm |           |           |          |        |         |         |
| Peak#         | Name      | Ret. Time | Area     | Height | Area%   | Height% |
| 1             | RT:45.385 | 45.385    | 23914563 | 359072 | 49.392  | 52.900  |
| 2             | RT:47.723 | 47.723    | 24503212 | 319698 | 50.608  | 47.100  |
| Total         |           |           | 48417775 | 678770 | 100.000 | 100.000 |

### Chiral (-)-9hh (82% ee)

mAU

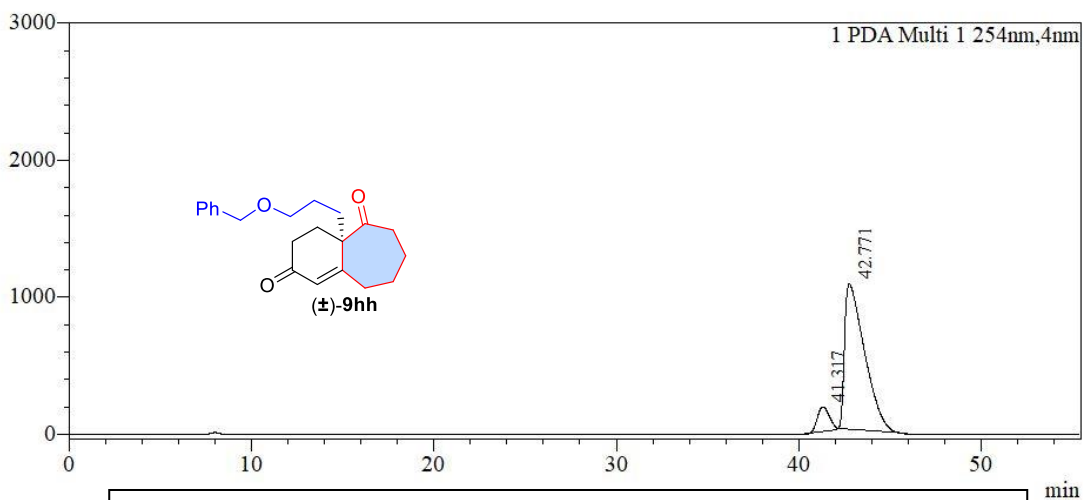

| Peak Table    |           |           |          |         |         |         |
|---------------|-----------|-----------|----------|---------|---------|---------|
| PDA Ch1 254nm |           |           |          |         |         |         |
| Peak#         | Name      | Ret. Time | Area     | Height  | Area%   | Height% |
| 1             | RT:41.317 | 41.317    | 7974392  | 177293  | 9.001   | 14.345  |
| 2             | RT:42.771 | 42.771    | 80618744 | 1058667 | 90.999  | 85.655  |
| Total         |           |           | 88593136 | 1235961 | 100.000 | 100.000 |

Racemic ( $\pm$ )-**9pp**:

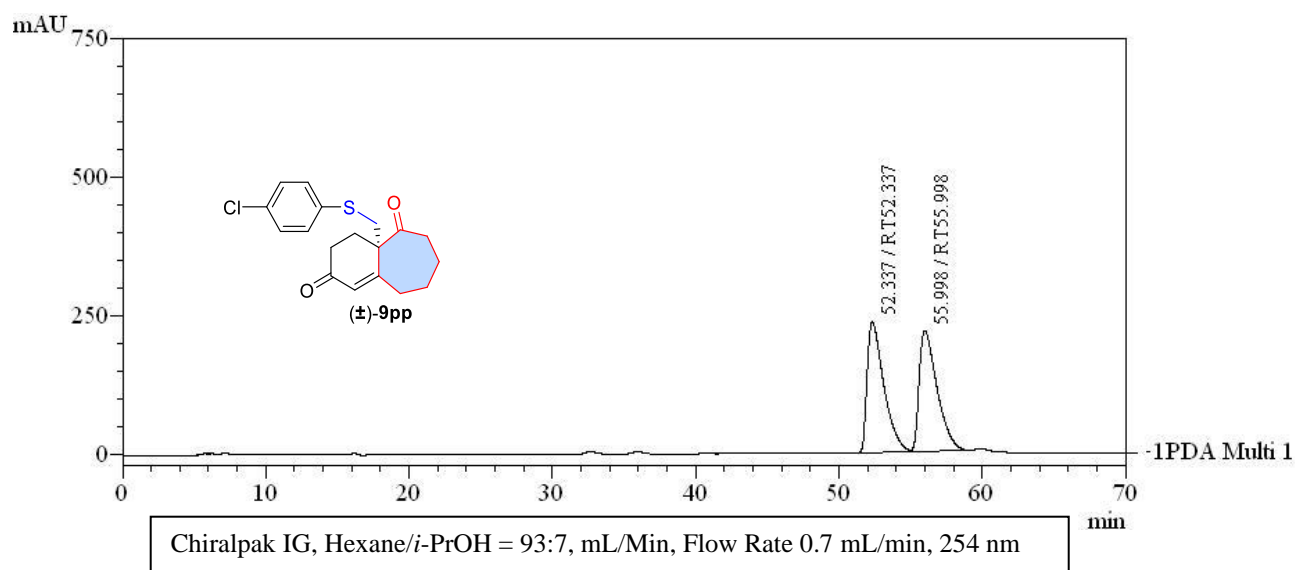

| PeakTable         |          |           |          |        |         |          |
|-------------------|----------|-----------|----------|--------|---------|----------|
| PDA Ch1 254nm 4nm |          |           |          |        |         |          |
| Peak#             | Name     | Ret. Time | Area     | Height | Area %  | Height % |
| 1                 | RT52.337 | 52.337    | 19256715 | 236522 | 50.320  | 51.981   |
| 2                 | RT55.998 | 55.998    | 19011717 | 218490 | 49.680  | 48.019   |
| Total             |          |           | 38268432 | 455013 | 100.000 | 100.000  |

Chiral (-)-**9pp** (92.7% *ee*)

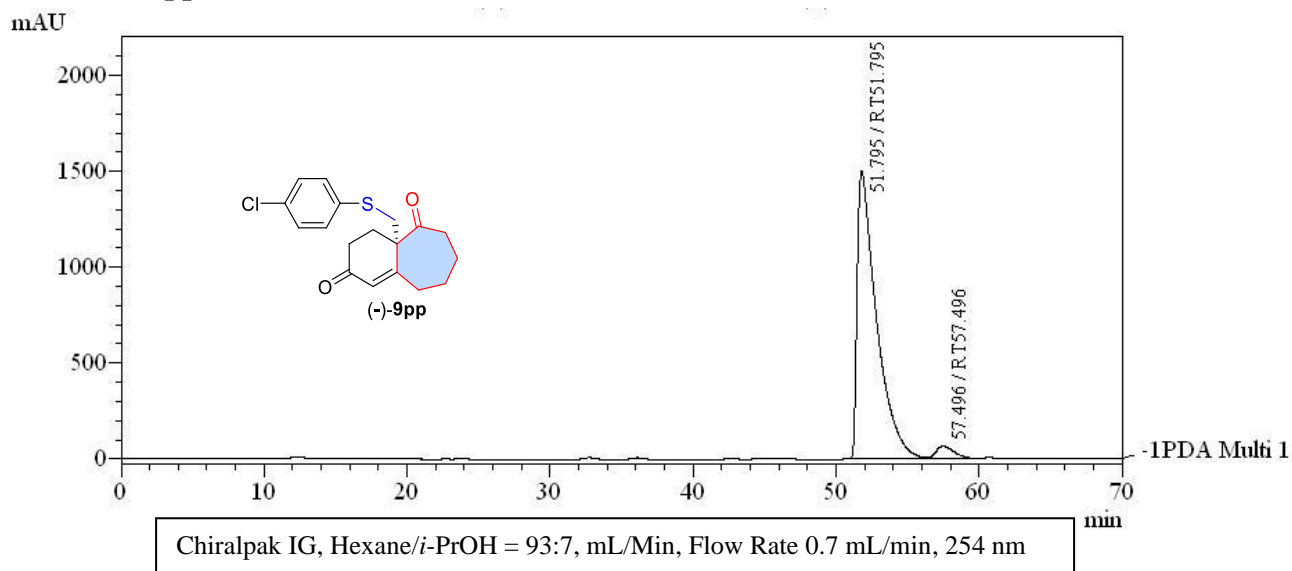

| PeakTable         |          |           |           |         |         |          |
|-------------------|----------|-----------|-----------|---------|---------|----------|
| PDA Ch1 254nm 4nm |          |           |           |         |         |          |
| Peak#             | Name     | Ret. Time | Area      | Height  | Area %  | Height % |
| 1                 | RT51.795 | 51.795    | 140768619 | 1498966 | 96.351  | 95.991   |
| 2                 | RT57.496 | 57.496    | 5331269   | 62599   | 3.649   | 4.009    |
| Total             |          |           | 146099888 | 1561565 | 100.000 | 100.000  |

Racemic ( $\pm$ )-**9oo**:

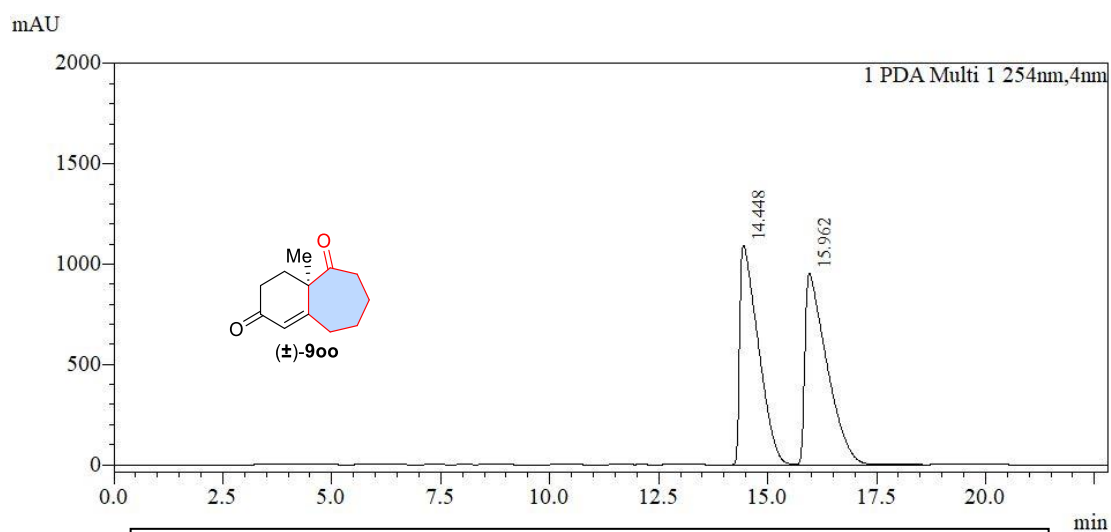

Chiralpak ID, Hexane/*i*-PrOH = 90:10, mL/Min, Flow Rate 1.0 mL/min, 254 nm

| Peak Table |           |           |          |         |         |         |
|------------|-----------|-----------|----------|---------|---------|---------|
| Peak#      | Name      | Ret. Time | Area     | Height  | Area%   | Height% |
| 1          | RT:14.448 | 14.448    | 32431820 | 1094791 | 49.304  | 53.502  |
| 2          | RT:15.962 | 15.962    | 33347605 | 951467  | 50.696  | 46.498  |
| Total      |           |           | 65779425 | 2046258 | 100.000 | 100.000 |

Chiral (-)-**9oo** (92% *ee*)

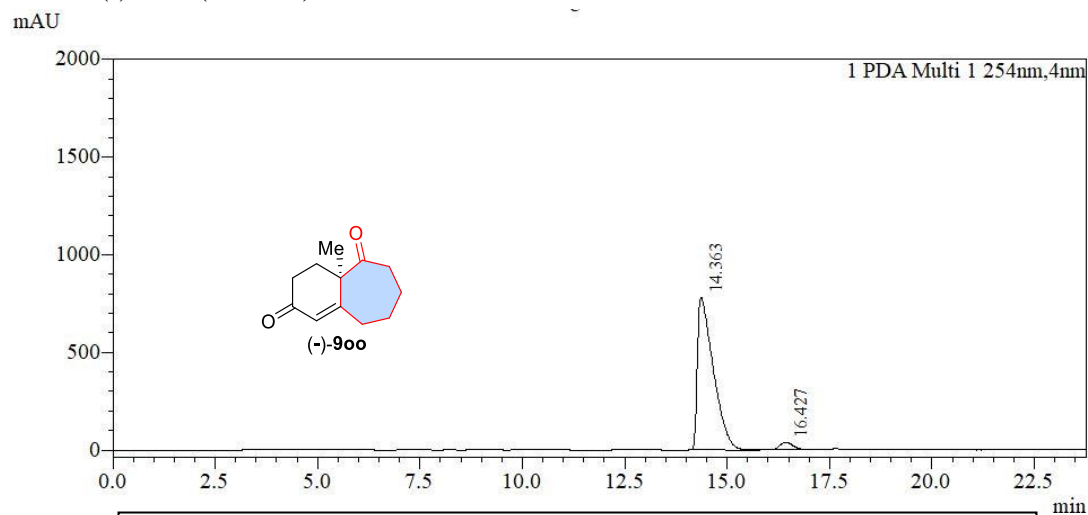

Chiralpak ID, Hexane/*i*-PrOH = 90:10, mL/Min, Flow Rate 1.0 mL/min, 254 nm

| Peak Table |           |           |          |        |         |         |
|------------|-----------|-----------|----------|--------|---------|---------|
| Peak#      | Name      | Ret. Time | Area     | Height | Area%   | Height% |
| 1          | RT:14.363 | 14.363    | 21232006 | 782667 | 96.111  | 95.427  |
| 2          | RT:16.427 | 16.427    | 859196   | 37507  | 3.889   | 4.573   |
| Total      |           |           | 22091202 | 820174 | 100.000 | 100.000 |

Racemic ( $\pm$ )-**9'a**:

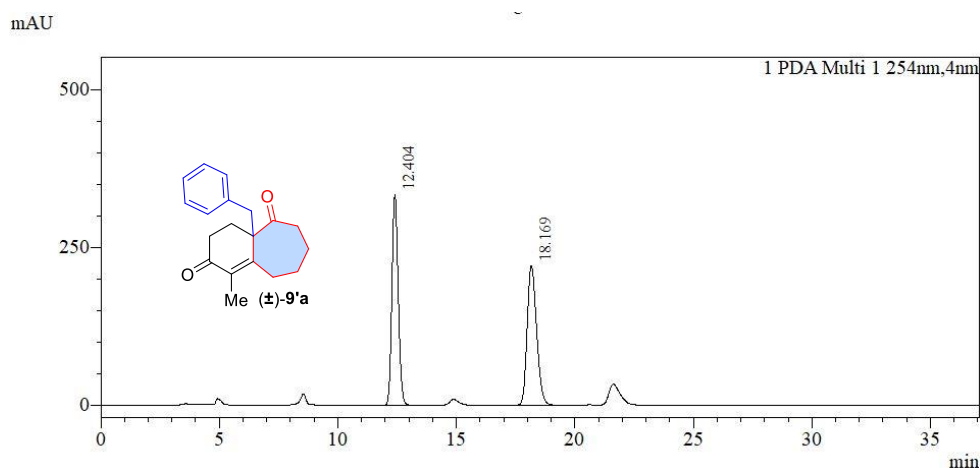

Chiralpak IG, Hexane/*i*-PrOH = 90:10, mL/Min, Flow Rate 1.0 mL/min,

| Peak Table |           |           |          |        |         |         |
|------------|-----------|-----------|----------|--------|---------|---------|
| Peak#      | Name      | Ret. Time | Area     | Height | Area%   | Height% |
| 1          | RT:12.404 | 12.404    | 6108026  | 333233 | 50.027  | 60.160  |
| 2          | RT:18.169 | 18.169    | 6101543  | 220681 | 49.973  | 39.840  |
| Total      |           |           | 12209569 | 553914 | 100.000 | 100.000 |

Chiral **9'a** (19% *ee*):

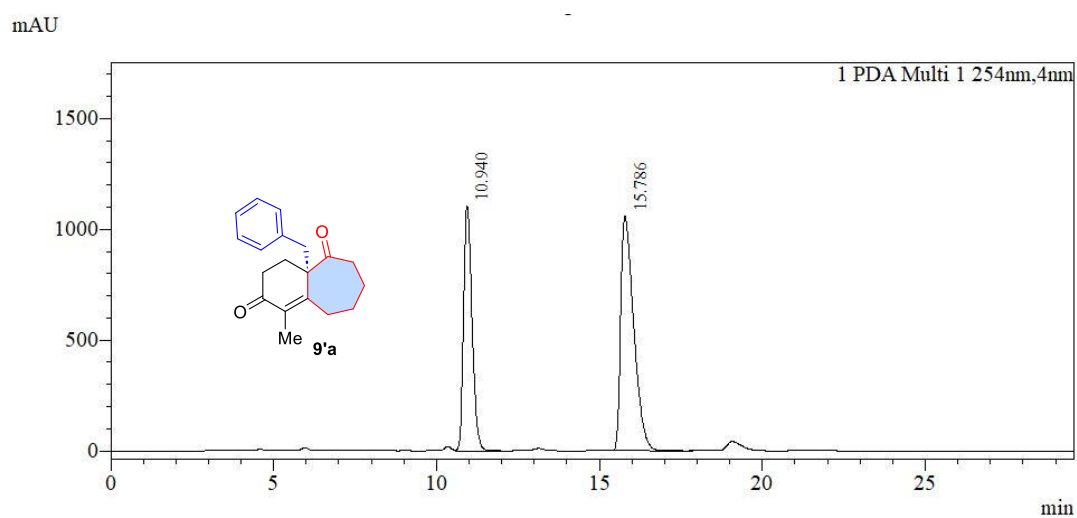

Chiralpak IG, Hexane/*i*-PrOH = 90:10, mL/Min, Flow Rate 1.0 mL/min, 254 nm

| Peak Table |           |           |          |         |         |         |
|------------|-----------|-----------|----------|---------|---------|---------|
| Peak#      | Name      | Ret. Time | Area     | Height  | Area%   | Height% |
| 1          | RT:10.940 | 10.940    | 20064698 | 1107029 | 40.551  | 51.060  |
| 2          | RT:15.786 | 15.786    | 29415907 | 1061073 | 59.449  | 48.940  |
| Total      |           |           | 49480605 | 2168102 | 100.000 | 100.000 |
